# Supplementary material for: Protein evidence of unannotated ORFs in Drosophila reveals unappreciated diversity in the evolution of young proteins
Source: bioRxiv preprint, doi:10.1101/2022.04.04.486978, version 2 (2022-08-08)
Supplement: Figure 1 - Source Data File 2 [file 486978_file03.csv]

	sequence_pep	EBZ_ID	length_pep	datasets	bestPEP	InFbpp_translation	blastp_hit	Var1	intergenic	antisense	sense	exonic	intronic	fiveUTR	threeUTR	EBZ_IDnew	annot	sequence_prot	length_prot	ATG
0	NLIFSTAFTLQHK	2	13	embryo.dev-embryo.PL	0.003331	0	False	EBZ_2.1_sets_embryo.dev-embryo	1.0	0.0	0.0	0.0	0.0	0.0	0.0	2.1	intergenic;	VFCINTKKHSKNLIFSTAFTLQHKLISFEI	30	-1
1	LHSFHFRFRHFR	4	12	embryo.dev-embryo.dev-adult	0.00033174	0	False	EBZ_4.1_sets_embryo.dev-embryo	0.0	1.0	0.0	0.0	0.0	0.0	0.0	4.1	antisense;	LHSFHFRFRHFRRRSAAQTARWRTLSLHF	29	-1
2	SAAQTARWRTLSLHF	4	15	dev-adult	3.2895	0	False	EBZ_4.1_sets_embryo.dev-embryo	0.0	1.0	0.0	0.0	0.0	0.0	0.0	4.1	antisense;	LHSFHFRFRHFRRRSAAQTARWRTLSLHF	29	-1
3	SAAQTARWR	4	9	dev-embryo	0.20685	0	False	EBZ_4.1_sets_embryo.dev-embryo	0.0	1.0	0.0	0.0	0.0	0.0	0.0	4.1	antisense;	LHSFHFRFRHFRRRSAAQTARWRTLSLHF	29	-1
4	EMHVTFRR	9	8	embryo	0.17670999999999998	0	False	EBZ_9.1_sets_embryo	1.0	0.0	0.0	0.0	0.0	0.0	0.0	9.1	intergenic;	QLFWSTIVEREMHVTFRRTTCPLCRGMRYADKPT	34	11
5	QLFWSTIVEREMHVTFR	9	17	dev-adult.embryo.PL	0.0047175	0	False	EBZ_9.1_sets_embryo	1.0	0.0	0.0	0.0	0.0	0.0	0.0	9.1	intergenic;	QLFWSTIVEREMHVTFRRTTCPLCRGMRYADKPT	34	11
6	RTTCPLCR	9	8	dev-adult.PL	0.1694	0	False	EBZ_9.1_sets_embryo	1.0	0.0	0.0	0.0	0.0	0.0	0.0	9.1	intergenic;	QLFWSTIVEREMHVTFRRTTCPLCRGMRYADKPT	34	11
7	GSIIKSDKNMSR	10	12	embryo	0.0061334	0	False	EBZ_10.1_sets_embryo	0.0	1.0	0.0	0.0	0.0	0.0	0.0	10.1	antisense;	GSIIKSDKNMSRIRIP	16	9
8	IAALCLVFGVTR	20	12	embryo	0.0036414	0	False	EBZ_20.1_sets_embryo	0.0	1.0	0.0	0.0	0.0	0.0	0.0	20.1	antisense;	RWLEVGHAKMQVRIAALCLVFGVTRVEGFPLNIQV	35	9
9	RWLEVGHAK	20	9	embryo	0.12311	0	False	EBZ_20.1_sets_embryo	0.0	1.0	0.0	0.0	0.0	0.0	0.0	20.1	antisense;	RWLEVGHAKMQVRIAALCLVFGVTRVEGFPLNIQV	35	9
10	WLEVGHAKMQVRIAALCLVFGVTR	20	24	embryo	0.4159100000000001	0	False	EBZ_20.1_sets_embryo	0.0	1.0	0.0	0.0	0.0	0.0	0.0	20.1	antisense;	RWLEVGHAKMQVRIAALCLVFGVTRVEGFPLNIQV	35	9
11	QYTLLVAAKLR	22	11	dev-adult.embryo.PL	0.0016574	0	False	EBZ_22.1_sets_embryo	1.0	0.0	0.0	0.0	0.0	0.0	0.0	22.1	intergenic;	MQYTLLVAAKLRNTLAIWRKLIRKTA	26	0
12	CRWTTLR	23	7	PL	0.20164	0	False	EBZ_23.1_sets_embryo.dev-embryo	0.0	0.0	1.0	0.0	1.0	0.0	0.0	23.1	sense;intronic;	SRSKFMIHTWQREGKCRWTTLRNHLSSECPTTYRFARAELCNAHLGILGAINKTGNCCRRCQVSKTA	67	5
13	CRWTTLRNHLSSECPTTYR	23	19	PL	0.14071	0	False	EBZ_23.1_sets_embryo.dev-embryo	0.0	0.0	1.0	0.0	1.0	0.0	0.0	23.1	sense;intronic;	SRSKFMIHTWQREGKCRWTTLRNHLSSECPTTYRFARAELCNAHLGILGAINKTGNCCRRCQVSKTA	67	5
14	FMIHTWQREGKCR	23	13	dev-adult.dev-embryo.PL	0.0056398	0	False	EBZ_23.1_sets_embryo.dev-embryo	0.0	0.0	1.0	0.0	1.0	0.0	0.0	23.1	sense;intronic;	SRSKFMIHTWQREGKCRWTTLRNHLSSECPTTYRFARAELCNAHLGILGAINKTGNCCRRCQVSKTA	67	5
15	NHLSSECPTTYRFARAELCNAHLGILGAINK	23	31	PL	0.40023	0	False	EBZ_23.1_sets_embryo.dev-embryo	0.0	0.0	1.0	0.0	1.0	0.0	0.0	23.1	sense;intronic;	SRSKFMIHTWQREGKCRWTTLRNHLSSECPTTYRFARAELCNAHLGILGAINKTGNCCRRCQVSKTA	67	5
16	EAAHCCWHCFLSPR	31	14	embryo	0.22193	0	False	EBZ_31.1_sets_embryo	0.0	0.0	1.0	0.0	1.0	0.0	0.0	31.1	sense;intronic;	VPLIFASRLAGVSGIGAEMGMEILCVPMSAHLKWLMGKEAAHCCWHCFLSPRISDREIQNHASSSGAQNVKMRTQCHKIA	80	18
17	EIQNHASSSGAQNVK	31	15	dev-adult.embryo.dev-embryo.PL	0.00051057	0	False	EBZ_31.1_sets_embryo	0.0	0.0	1.0	0.0	1.0	0.0	0.0	31.1	sense;intronic;	VPLIFASRLAGVSGIGAEMGMEILCVPMSAHLKWLMGKEAAHCCWHCFLSPRISDREIQNHASSSGAQNVKMRTQCHKIA	80	18
18	VPLIFASR	31	8	embryo.PL	0.3846	0	False	EBZ_31.1_sets_embryo	0.0	0.0	1.0	0.0	1.0	0.0	0.0	31.1	sense;intronic;	VPLIFASRLAGVSGIGAEMGMEILCVPMSAHLKWLMGKEAAHCCWHCFLSPRISDREIQNHASSSGAQNVKMRTQCHKIA	80	18
19	ISDREIQNHASSSGAQNVK	31	19	PL	0.13677999999999998	0	False	EBZ_31.1_sets_embryo	0.0	0.0	1.0	0.0	1.0	0.0	0.0	31.1	sense;intronic;	VPLIFASRLAGVSGIGAEMGMEILCVPMSAHLKWLMGKEAAHCCWHCFLSPRISDREIQNHASSSGAQNVKMRTQCHKIA	80	18
20	ISDREIQNHASSSGAQNVKMR	31	21	PL	2.8444	0	False	EBZ_31.1_sets_embryo	0.0	0.0	1.0	0.0	1.0	0.0	0.0	31.1	sense;intronic;	VPLIFASRLAGVSGIGAEMGMEILCVPMSAHLKWLMGKEAAHCCWHCFLSPRISDREIQNHASSSGAQNVKMRTQCHKIA	80	18
21	LAGVSGIGAEMGMEILCVPMSAHLK	31	25	PL	0.18448	0	False	EBZ_31.1_sets_embryo	0.0	0.0	1.0	0.0	1.0	0.0	0.0	31.1	sense;intronic;	VPLIFASRLAGVSGIGAEMGMEILCVPMSAHLKWLMGKEAAHCCWHCFLSPRISDREIQNHASSSGAQNVKMRTQCHKIA	80	18
22	WLMGKEAAHCCWHCFLSPR	31	19	PL	0.12449	0	False	EBZ_31.1_sets_embryo	0.0	0.0	1.0	0.0	1.0	0.0	0.0	31.1	sense;intronic;	VPLIFASRLAGVSGIGAEMGMEILCVPMSAHLKWLMGKEAAHCCWHCFLSPRISDREIQNHASSSGAQNVKMRTQCHKIA	80	18
23	EIQNHASSSGAQNVKMRTQCHK	31	22	dev-embryo	0.15621	0	False	EBZ_31.1_sets_embryo	0.0	0.0	1.0	0.0	1.0	0.0	0.0	31.1	sense;intronic;	VPLIFASRLAGVSGIGAEMGMEILCVPMSAHLKWLMGKEAAHCCWHCFLSPRISDREIQNHASSSGAQNVKMRTQCHKIA	80	18
24	AANCIYK	32	7	embryo	0.18853	0	False	EBZ_32.1_sets_embryo.dev-embryo	105.0	60.0	74.0	4.0	74.0	1.0	1.0	32.1	intergenic;antisense;sense;exonic;intronic;fiveUTR;threeUTR;	TINVDQKKWKNFKLADPDFNKPGRIDLIIGADVYTHILQNGVIKIDGLLGQKTDFGWIVSGCKKSKGKETIVATTIEIKELDRYWEVEEEEKDDIESEICENKFIKTTKKDSDGRYIVSIPFKEDVTLGDSKKQAIARYMNLEKKLKRNEKLKVDYTKFMNEYMDLGHMIEVSDEGKYFLPHQAVIRDSSLTTKLRVVFDASAKTTNNKSLNDIMWVGPRVQKDIFDIIIKWRKWEFVVSADIEKMYRQIKIDNNDQKYQYILWRNSPKEKIKTYKLTTVTYGTASAPYLATRVLVDIADKCKNQVISAIIRNDFYMDDLMTGADSVEEANKLITLIPHELQKVGFNLRKWISNNSKILTTVEDTGDNKVLNIIENECVKTLGLKWEPQKDLFKFSVNC…	1748	139
25	ATSGMSK	32	7	embryo	2.3727	0	False	EBZ_32.1_sets_embryo.dev-embryo	105.0	60.0	74.0	4.0	74.0	1.0	1.0	32.1	intergenic;antisense;sense;exonic;intronic;fiveUTR;threeUTR;	TINVDQKKWKNFKLADPDFNKPGRIDLIIGADVYTHILQNGVIKIDGLLGQKTDFGWIVSGCKKSKGKETIVATTIEIKELDRYWEVEEEEKDDIESEICENKFIKTTKKDSDGRYIVSIPFKEDVTLGDSKKQAIARYMNLEKKLKRNEKLKVDYTKFMNEYMDLGHMIEVSDEGKYFLPHQAVIRDSSLTTKLRVVFDASAKTTNNKSLNDIMWVGPRVQKDIFDIIIKWRKWEFVVSADIEKMYRQIKIDNNDQKYQYILWRNSPKEKIKTYKLTTVTYGTASAPYLATRVLVDIADKCKNQVISAIIRNDFYMDDLMTGADSVEEANKLITLIPHELQKVGFNLRKWISNNSKILTTVEDTGDNKVLNIIENECVKTLGLKWEPQKDLFKFSVNC…	1748	139
26	AYAAVVYAK	32	9	embryo.dev-embryo	0.019722	0	False	EBZ_32.1_sets_embryo.dev-embryo	105.0	60.0	74.0	4.0	74.0	1.0	1.0	32.1	intergenic;antisense;sense;exonic;intronic;fiveUTR;threeUTR;	TINVDQKKWKNFKLADPDFNKPGRIDLIIGADVYTHILQNGVIKIDGLLGQKTDFGWIVSGCKKSKGKETIVATTIEIKELDRYWEVEEEEKDDIESEICENKFIKTTKKDSDGRYIVSIPFKEDVTLGDSKKQAIARYMNLEKKLKRNEKLKVDYTKFMNEYMDLGHMIEVSDEGKYFLPHQAVIRDSSLTTKLRVVFDASAKTTNNKSLNDIMWVGPRVQKDIFDIIIKWRKWEFVVSADIEKMYRQIKIDNNDQKYQYILWRNSPKEKIKTYKLTTVTYGTASAPYLATRVLVDIADKCKNQVISAIIRNDFYMDDLMTGADSVEEANKLITLIPHELQKVGFNLRKWISNNSKILTTVEDTGDNKVLNIIENECVKTLGLKWEPQKDLFKFSVNC…	1748	139
27	CHLTSLLIK	32	9	embryo	0.01697	0	False	EBZ_32.1_sets_embryo.dev-embryo	105.0	60.0	74.0	4.0	74.0	1.0	1.0	32.1	intergenic;antisense;sense;exonic;intronic;fiveUTR;threeUTR;	TINVDQKKWKNFKLADPDFNKPGRIDLIIGADVYTHILQNGVIKIDGLLGQKTDFGWIVSGCKKSKGKETIVATTIEIKELDRYWEVEEEEKDDIESEICENKFIKTTKKDSDGRYIVSIPFKEDVTLGDSKKQAIARYMNLEKKLKRNEKLKVDYTKFMNEYMDLGHMIEVSDEGKYFLPHQAVIRDSSLTTKLRVVFDASAKTTNNKSLNDIMWVGPRVQKDIFDIIIKWRKWEFVVSADIEKMYRQIKIDNNDQKYQYILWRNSPKEKIKTYKLTTVTYGTASAPYLATRVLVDIADKCKNQVISAIIRNDFYMDDLMTGADSVEEANKLITLIPHELQKVGFNLRKWISNNSKILTTVEDTGDNKVLNIIENECVKTLGLKWEPQKDLFKFSVNC…	1748	139
28	CKNQVISAIIRNDFYMDDLMTGADSVEEANK	32	31	embryo	0.40806	0	False	EBZ_32.1_sets_embryo.dev-embryo	105.0	60.0	74.0	4.0	74.0	1.0	1.0	32.1	intergenic;antisense;sense;exonic;intronic;fiveUTR;threeUTR;	TINVDQKKWKNFKLADPDFNKPGRIDLIIGADVYTHILQNGVIKIDGLLGQKTDFGWIVSGCKKSKGKETIVATTIEIKELDRYWEVEEEEKDDIESEICENKFIKTTKKDSDGRYIVSIPFKEDVTLGDSKKQAIARYMNLEKKLKRNEKLKVDYTKFMNEYMDLGHMIEVSDEGKYFLPHQAVIRDSSLTTKLRVVFDASAKTTNNKSLNDIMWVGPRVQKDIFDIIIKWRKWEFVVSADIEKMYRQIKIDNNDQKYQYILWRNSPKEKIKTYKLTTVTYGTASAPYLATRVLVDIADKCKNQVISAIIRNDFYMDDLMTGADSVEEANKLITLIPHELQKVGFNLRKWISNNSKILTTVEDTGDNKVLNIIENECVKTLGLKWEPQKDLFKFSVNC…	1748	139
29	DIAPRYSIDK	32	10	embryo.dev-embryo	0.36912	0	False	EBZ_32.1_sets_embryo.dev-embryo	105.0	60.0	74.0	4.0	74.0	1.0	1.0	32.1	intergenic;antisense;sense;exonic;intronic;fiveUTR;threeUTR;	TINVDQKKWKNFKLADPDFNKPGRIDLIIGADVYTHILQNGVIKIDGLLGQKTDFGWIVSGCKKSKGKETIVATTIEIKELDRYWEVEEEEKDDIESEICENKFIKTTKKDSDGRYIVSIPFKEDVTLGDSKKQAIARYMNLEKKLKRNEKLKVDYTKFMNEYMDLGHMIEVSDEGKYFLPHQAVIRDSSLTTKLRVVFDASAKTTNNKSLNDIMWVGPRVQKDIFDIIIKWRKWEFVVSADIEKMYRQIKIDNNDQKYQYILWRNSPKEKIKTYKLTTVTYGTASAPYLATRVLVDIADKCKNQVISAIIRNDFYMDDLMTGADSVEEANKLITLIPHELQKVGFNLRKWISNNSKILTTVEDTGDNKVLNIIENECVKTLGLKWEPQKDLFKFSVNC…	1748	139
30	DIAPRYSIDKINK	32	13	embryo	0.26617	0	False	EBZ_32.1_sets_embryo.dev-embryo	105.0	60.0	74.0	4.0	74.0	1.0	1.0	32.1	intergenic;antisense;sense;exonic;intronic;fiveUTR;threeUTR;	TINVDQKKWKNFKLADPDFNKPGRIDLIIGADVYTHILQNGVIKIDGLLGQKTDFGWIVSGCKKSKGKETIVATTIEIKELDRYWEVEEEEKDDIESEICENKFIKTTKKDSDGRYIVSIPFKEDVTLGDSKKQAIARYMNLEKKLKRNEKLKVDYTKFMNEYMDLGHMIEVSDEGKYFLPHQAVIRDSSLTTKLRVVFDASAKTTNNKSLNDIMWVGPRVQKDIFDIIIKWRKWEFVVSADIEKMYRQIKIDNNDQKYQYILWRNSPKEKIKTYKLTTVTYGTASAPYLATRVLVDIADKCKNQVISAIIRNDFYMDDLMTGADSVEEANKLITLIPHELQKVGFNLRKWISNNSKILTTVEDTGDNKVLNIIENECVKTLGLKWEPQKDLFKFSVNC…	1748	139
31	DIFDIIIK	32	8	embryo.dev-embryo	0.0039421	0	False	EBZ_32.1_sets_embryo.dev-embryo	105.0	60.0	74.0	4.0	74.0	1.0	1.0	32.1	intergenic;antisense;sense;exonic;intronic;fiveUTR;threeUTR;	TINVDQKKWKNFKLADPDFNKPGRIDLIIGADVYTHILQNGVIKIDGLLGQKTDFGWIVSGCKKSKGKETIVATTIEIKELDRYWEVEEEEKDDIESEICENKFIKTTKKDSDGRYIVSIPFKEDVTLGDSKKQAIARYMNLEKKLKRNEKLKVDYTKFMNEYMDLGHMIEVSDEGKYFLPHQAVIRDSSLTTKLRVVFDASAKTTNNKSLNDIMWVGPRVQKDIFDIIIKWRKWEFVVSADIEKMYRQIKIDNNDQKYQYILWRNSPKEKIKTYKLTTVTYGTASAPYLATRVLVDIADKCKNQVISAIIRNDFYMDDLMTGADSVEEANKLITLIPHELQKVGFNLRKWISNNSKILTTVEDTGDNKVLNIIENECVKTLGLKWEPQKDLFKFSVNC…	1748	139
32	DLHFHHISGHAGLIIALILMIVLIIYFIRK	32	30	embryo.dev-embryo	0.18247	0	False	EBZ_32.1_sets_embryo.dev-embryo	105.0	60.0	74.0	4.0	74.0	1.0	1.0	32.1	intergenic;antisense;sense;exonic;intronic;fiveUTR;threeUTR;	TINVDQKKWKNFKLADPDFNKPGRIDLIIGADVYTHILQNGVIKIDGLLGQKTDFGWIVSGCKKSKGKETIVATTIEIKELDRYWEVEEEEKDDIESEICENKFIKTTKKDSDGRYIVSIPFKEDVTLGDSKKQAIARYMNLEKKLKRNEKLKVDYTKFMNEYMDLGHMIEVSDEGKYFLPHQAVIRDSSLTTKLRVVFDASAKTTNNKSLNDIMWVGPRVQKDIFDIIIKWRKWEFVVSADIEKMYRQIKIDNNDQKYQYILWRNSPKEKIKTYKLTTVTYGTASAPYLATRVLVDIADKCKNQVISAIIRNDFYMDDLMTGADSVEEANKLITLIPHELQKVGFNLRKWISNNSKILTTVEDTGDNKVLNIIENECVKTLGLKWEPQKDLFKFSVNC…	1748	139
33	DQQEVLTPGHFLIGRPPLEIVEPMEDEKIGNLDR	32	34	embryo	0.14067000000000002	0	False	EBZ_32.1_sets_embryo.dev-embryo	105.0	60.0	74.0	4.0	74.0	1.0	1.0	32.1	intergenic;antisense;sense;exonic;intronic;fiveUTR;threeUTR;	TINVDQKKWKNFKLADPDFNKPGRIDLIIGADVYTHILQNGVIKIDGLLGQKTDFGWIVSGCKKSKGKETIVATTIEIKELDRYWEVEEEEKDDIESEICENKFIKTTKKDSDGRYIVSIPFKEDVTLGDSKKQAIARYMNLEKKLKRNEKLKVDYTKFMNEYMDLGHMIEVSDEGKYFLPHQAVIRDSSLTTKLRVVFDASAKTTNNKSLNDIMWVGPRVQKDIFDIIIKWRKWEFVVSADIEKMYRQIKIDNNDQKYQYILWRNSPKEKIKTYKLTTVTYGTASAPYLATRVLVDIADKCKNQVISAIIRNDFYMDDLMTGADSVEEANKLITLIPHELQKVGFNLRKWISNNSKILTTVEDTGDNKVLNIIENECVKTLGLKWEPQKDLFKFSVNC…	1748	139
34	EDVTLGDSKKQAIAR	32	15	embryo	0.1544	0	False	EBZ_32.1_sets_embryo.dev-embryo	105.0	60.0	74.0	4.0	74.0	1.0	1.0	32.1	intergenic;antisense;sense;exonic;intronic;fiveUTR;threeUTR;	TINVDQKKWKNFKLADPDFNKPGRIDLIIGADVYTHILQNGVIKIDGLLGQKTDFGWIVSGCKKSKGKETIVATTIEIKELDRYWEVEEEEKDDIESEICENKFIKTTKKDSDGRYIVSIPFKEDVTLGDSKKQAIARYMNLEKKLKRNEKLKVDYTKFMNEYMDLGHMIEVSDEGKYFLPHQAVIRDSSLTTKLRVVFDASAKTTNNKSLNDIMWVGPRVQKDIFDIIIKWRKWEFVVSADIEKMYRQIKIDNNDQKYQYILWRNSPKEKIKTYKLTTVTYGTASAPYLATRVLVDIADKCKNQVISAIIRNDFYMDDLMTGADSVEEANKLITLIPHELQKVGFNLRKWISNNSKILTTVEDTGDNKVLNIIENECVKTLGLKWEPQKDLFKFSVNC…	1748	139
35	EIPNIEEGQIVLLKDENCHPAR	32	22	embryo	0.19135	0	False	EBZ_32.1_sets_embryo.dev-embryo	105.0	60.0	74.0	4.0	74.0	1.0	1.0	32.1	intergenic;antisense;sense;exonic;intronic;fiveUTR;threeUTR;	TINVDQKKWKNFKLADPDFNKPGRIDLIIGADVYTHILQNGVIKIDGLLGQKTDFGWIVSGCKKSKGKETIVATTIEIKELDRYWEVEEEEKDDIESEICENKFIKTTKKDSDGRYIVSIPFKEDVTLGDSKKQAIARYMNLEKKLKRNEKLKVDYTKFMNEYMDLGHMIEVSDEGKYFLPHQAVIRDSSLTTKLRVVFDASAKTTNNKSLNDIMWVGPRVQKDIFDIIIKWRKWEFVVSADIEKMYRQIKIDNNDQKYQYILWRNSPKEKIKTYKLTTVTYGTASAPYLATRVLVDIADKCKNQVISAIIRNDFYMDDLMTGADSVEEANKLITLIPHELQKVGFNLRKWISNNSKILTTVEDTGDNKVLNIIENECVKTLGLKWEPQKDLFKFSVNC…	1748	139
36	ENLLLLENIR	32	10	embryo	0.16362000000000002	0	False	EBZ_32.1_sets_embryo.dev-embryo	105.0	60.0	74.0	4.0	74.0	1.0	1.0	32.1	intergenic;antisense;sense;exonic;intronic;fiveUTR;threeUTR;	TINVDQKKWKNFKLADPDFNKPGRIDLIIGADVYTHILQNGVIKIDGLLGQKTDFGWIVSGCKKSKGKETIVATTIEIKELDRYWEVEEEEKDDIESEICENKFIKTTKKDSDGRYIVSIPFKEDVTLGDSKKQAIARYMNLEKKLKRNEKLKVDYTKFMNEYMDLGHMIEVSDEGKYFLPHQAVIRDSSLTTKLRVVFDASAKTTNNKSLNDIMWVGPRVQKDIFDIIIKWRKWEFVVSADIEKMYRQIKIDNNDQKYQYILWRNSPKEKIKTYKLTTVTYGTASAPYLATRVLVDIADKCKNQVISAIIRNDFYMDDLMTGADSVEEANKLITLIPHELQKVGFNLRKWISNNSKILTTVEDTGDNKVLNIIENECVKTLGLKWEPQKDLFKFSVNC…	1748	139
37	ENYYVYKESIK	32	11	embryo	1.0019	0	False	EBZ_32.1_sets_embryo.dev-embryo	105.0	60.0	74.0	4.0	74.0	1.0	1.0	32.1	intergenic;antisense;sense;exonic;intronic;fiveUTR;threeUTR;	TINVDQKKWKNFKLADPDFNKPGRIDLIIGADVYTHILQNGVIKIDGLLGQKTDFGWIVSGCKKSKGKETIVATTIEIKELDRYWEVEEEEKDDIESEICENKFIKTTKKDSDGRYIVSIPFKEDVTLGDSKKQAIARYMNLEKKLKRNEKLKVDYTKFMNEYMDLGHMIEVSDEGKYFLPHQAVIRDSSLTTKLRVVFDASAKTTNNKSLNDIMWVGPRVQKDIFDIIIKWRKWEFVVSADIEKMYRQIKIDNNDQKYQYILWRNSPKEKIKTYKLTTVTYGTASAPYLATRVLVDIADKCKNQVISAIIRNDFYMDDLMTGADSVEEANKLITLIPHELQKVGFNLRKWISNNSKILTTVEDTGDNKVLNIIENECVKTLGLKWEPQKDLFKFSVNC…	1748	139
38	EQLEENMK	32	8	embryo	0.45637	0	False	EBZ_32.1_sets_embryo.dev-embryo	105.0	60.0	74.0	4.0	74.0	1.0	1.0	32.1	intergenic;antisense;sense;exonic;intronic;fiveUTR;threeUTR;	TINVDQKKWKNFKLADPDFNKPGRIDLIIGADVYTHILQNGVIKIDGLLGQKTDFGWIVSGCKKSKGKETIVATTIEIKELDRYWEVEEEEKDDIESEICENKFIKTTKKDSDGRYIVSIPFKEDVTLGDSKKQAIARYMNLEKKLKRNEKLKVDYTKFMNEYMDLGHMIEVSDEGKYFLPHQAVIRDSSLTTKLRVVFDASAKTTNNKSLNDIMWVGPRVQKDIFDIIIKWRKWEFVVSADIEKMYRQIKIDNNDQKYQYILWRNSPKEKIKTYKLTTVTYGTASAPYLATRVLVDIADKCKNQVISAIIRNDFYMDDLMTGADSVEEANKLITLIPHELQKVGFNLRKWISNNSKILTTVEDTGDNKVLNIIENECVKTLGLKWEPQKDLFKFSVNC…	1748	139
39	EQLEENMKNLLDNQNNLDKLIQK	32	23	embryo	0.097509	0	False	EBZ_32.1_sets_embryo.dev-embryo	105.0	60.0	74.0	4.0	74.0	1.0	1.0	32.1	intergenic;antisense;sense;exonic;intronic;fiveUTR;threeUTR;	TINVDQKKWKNFKLADPDFNKPGRIDLIIGADVYTHILQNGVIKIDGLLGQKTDFGWIVSGCKKSKGKETIVATTIEIKELDRYWEVEEEEKDDIESEICENKFIKTTKKDSDGRYIVSIPFKEDVTLGDSKKQAIARYMNLEKKLKRNEKLKVDYTKFMNEYMDLGHMIEVSDEGKYFLPHQAVIRDSSLTTKLRVVFDASAKTTNNKSLNDIMWVGPRVQKDIFDIIIKWRKWEFVVSADIEKMYRQIKIDNNDQKYQYILWRNSPKEKIKTYKLTTVTYGTASAPYLATRVLVDIADKCKNQVISAIIRNDFYMDDLMTGADSVEEANKLITLIPHELQKVGFNLRKWISNNSKILTTVEDTGDNKVLNIIENECVKTLGLKWEPQKDLFKFSVNC…	1748	139
40	ETLHGGINLMR	32	11	embryo	0.0015009	0	False	EBZ_32.1_sets_embryo.dev-embryo	105.0	60.0	74.0	4.0	74.0	1.0	1.0	32.1	intergenic;antisense;sense;exonic;intronic;fiveUTR;threeUTR;	TINVDQKKWKNFKLADPDFNKPGRIDLIIGADVYTHILQNGVIKIDGLLGQKTDFGWIVSGCKKSKGKETIVATTIEIKELDRYWEVEEEEKDDIESEICENKFIKTTKKDSDGRYIVSIPFKEDVTLGDSKKQAIARYMNLEKKLKRNEKLKVDYTKFMNEYMDLGHMIEVSDEGKYFLPHQAVIRDSSLTTKLRVVFDASAKTTNNKSLNDIMWVGPRVQKDIFDIIIKWRKWEFVVSADIEKMYRQIKIDNNDQKYQYILWRNSPKEKIKTYKLTTVTYGTASAPYLATRVLVDIADKCKNQVISAIIRNDFYMDDLMTGADSVEEANKLITLIPHELQKVGFNLRKWISNNSKILTTVEDTGDNKVLNIIENECVKTLGLKWEPQKDLFKFSVNC…	1748	139
41	FIKTTKK	32	7	embryo	4.1266	0	False	EBZ_32.1_sets_embryo.dev-embryo	105.0	60.0	74.0	4.0	74.0	1.0	1.0	32.1	intergenic;antisense;sense;exonic;intronic;fiveUTR;threeUTR;	TINVDQKKWKNFKLADPDFNKPGRIDLIIGADVYTHILQNGVIKIDGLLGQKTDFGWIVSGCKKSKGKETIVATTIEIKELDRYWEVEEEEKDDIESEICENKFIKTTKKDSDGRYIVSIPFKEDVTLGDSKKQAIARYMNLEKKLKRNEKLKVDYTKFMNEYMDLGHMIEVSDEGKYFLPHQAVIRDSSLTTKLRVVFDASAKTTNNKSLNDIMWVGPRVQKDIFDIIIKWRKWEFVVSADIEKMYRQIKIDNNDQKYQYILWRNSPKEKIKTYKLTTVTYGTASAPYLATRVLVDIADKCKNQVISAIIRNDFYMDDLMTGADSVEEANKLITLIPHELQKVGFNLRKWISNNSKILTTVEDTGDNKVLNIIENECVKTLGLKWEPQKDLFKFSVNC…	1748	139
42	FSVNCNDESK	32	10	embryo	0.18891	0	False	EBZ_32.1_sets_embryo.dev-embryo	105.0	60.0	74.0	4.0	74.0	1.0	1.0	32.1	intergenic;antisense;sense;exonic;intronic;fiveUTR;threeUTR;	TINVDQKKWKNFKLADPDFNKPGRIDLIIGADVYTHILQNGVIKIDGLLGQKTDFGWIVSGCKKSKGKETIVATTIEIKELDRYWEVEEEEKDDIESEICENKFIKTTKKDSDGRYIVSIPFKEDVTLGDSKKQAIARYMNLEKKLKRNEKLKVDYTKFMNEYMDLGHMIEVSDEGKYFLPHQAVIRDSSLTTKLRVVFDASAKTTNNKSLNDIMWVGPRVQKDIFDIIIKWRKWEFVVSADIEKMYRQIKIDNNDQKYQYILWRNSPKEKIKTYKLTTVTYGTASAPYLATRVLVDIADKCKNQVISAIIRNDFYMDDLMTGADSVEEANKLITLIPHELQKVGFNLRKWISNNSKILTTVEDTGDNKVLNIIENECVKTLGLKWEPQKDLFKFSVNC…	1748	139
43	FSVNCNDESKNINKR	32	15	embryo.dev-embryo	0.26478	0	False	EBZ_32.1_sets_embryo.dev-embryo	105.0	60.0	74.0	4.0	74.0	1.0	1.0	32.1	intergenic;antisense;sense;exonic;intronic;fiveUTR;threeUTR;	TINVDQKKWKNFKLADPDFNKPGRIDLIIGADVYTHILQNGVIKIDGLLGQKTDFGWIVSGCKKSKGKETIVATTIEIKELDRYWEVEEEEKDDIESEICENKFIKTTKKDSDGRYIVSIPFKEDVTLGDSKKQAIARYMNLEKKLKRNEKLKVDYTKFMNEYMDLGHMIEVSDEGKYFLPHQAVIRDSSLTTKLRVVFDASAKTTNNKSLNDIMWVGPRVQKDIFDIIIKWRKWEFVVSADIEKMYRQIKIDNNDQKYQYILWRNSPKEKIKTYKLTTVTYGTASAPYLATRVLVDIADKCKNQVISAIIRNDFYMDDLMTGADSVEEANKLITLIPHELQKVGFNLRKWISNNSKILTTVEDTGDNKVLNIIENECVKTLGLKWEPQKDLFKFSVNC…	1748	139
44	FVQMKTRNR	32	9	embryo	0.3804	0	False	EBZ_32.1_sets_embryo.dev-embryo	105.0	60.0	74.0	4.0	74.0	1.0	1.0	32.1	intergenic;antisense;sense;exonic;intronic;fiveUTR;threeUTR;	TINVDQKKWKNFKLADPDFNKPGRIDLIIGADVYTHILQNGVIKIDGLLGQKTDFGWIVSGCKKSKGKETIVATTIEIKELDRYWEVEEEEKDDIESEICENKFIKTTKKDSDGRYIVSIPFKEDVTLGDSKKQAIARYMNLEKKLKRNEKLKVDYTKFMNEYMDLGHMIEVSDEGKYFLPHQAVIRDSSLTTKLRVVFDASAKTTNNKSLNDIMWVGPRVQKDIFDIIIKWRKWEFVVSADIEKMYRQIKIDNNDQKYQYILWRNSPKEKIKTYKLTTVTYGTASAPYLATRVLVDIADKCKNQVISAIIRNDFYMDDLMTGADSVEEANKLITLIPHELQKVGFNLRKWISNNSKILTTVEDTGDNKVLNIIENECVKTLGLKWEPQKDLFKFSVNC…	1748	139
45	GLFIDDK	32	7	embryo	0.44443	0	False	EBZ_32.1_sets_embryo.dev-embryo	105.0	60.0	74.0	4.0	74.0	1.0	1.0	32.1	intergenic;antisense;sense;exonic;intronic;fiveUTR;threeUTR;	TINVDQKKWKNFKLADPDFNKPGRIDLIIGADVYTHILQNGVIKIDGLLGQKTDFGWIVSGCKKSKGKETIVATTIEIKELDRYWEVEEEEKDDIESEICENKFIKTTKKDSDGRYIVSIPFKEDVTLGDSKKQAIARYMNLEKKLKRNEKLKVDYTKFMNEYMDLGHMIEVSDEGKYFLPHQAVIRDSSLTTKLRVVFDASAKTTNNKSLNDIMWVGPRVQKDIFDIIIKWRKWEFVVSADIEKMYRQIKIDNNDQKYQYILWRNSPKEKIKTYKLTTVTYGTASAPYLATRVLVDIADKCKNQVISAIIRNDFYMDDLMTGADSVEEANKLITLIPHELQKVGFNLRKWISNNSKILTTVEDTGDNKVLNIIENECVKTLGLKWEPQKDLFKFSVNC…	1748	139
46	GLFIDDKLIISAK	32	13	embryo	0.091268	0	False	EBZ_32.1_sets_embryo.dev-embryo	105.0	60.0	74.0	4.0	74.0	1.0	1.0	32.1	intergenic;antisense;sense;exonic;intronic;fiveUTR;threeUTR;	TINVDQKKWKNFKLADPDFNKPGRIDLIIGADVYTHILQNGVIKIDGLLGQKTDFGWIVSGCKKSKGKETIVATTIEIKELDRYWEVEEEEKDDIESEICENKFIKTTKKDSDGRYIVSIPFKEDVTLGDSKKQAIARYMNLEKKLKRNEKLKVDYTKFMNEYMDLGHMIEVSDEGKYFLPHQAVIRDSSLTTKLRVVFDASAKTTNNKSLNDIMWVGPRVQKDIFDIIIKWRKWEFVVSADIEKMYRQIKIDNNDQKYQYILWRNSPKEKIKTYKLTTVTYGTASAPYLATRVLVDIADKCKNQVISAIIRNDFYMDDLMTGADSVEEANKLITLIPHELQKVGFNLRKWISNNSKILTTVEDTGDNKVLNIIENECVKTLGLKWEPQKDLFKFSVNC…	1748	139
47	GNALIQSMR	32	9	embryo.dev-embryo	0.0016259	0	False	EBZ_32.1_sets_embryo.dev-embryo	105.0	60.0	74.0	4.0	74.0	1.0	1.0	32.1	intergenic;antisense;sense;exonic;intronic;fiveUTR;threeUTR;	TINVDQKKWKNFKLADPDFNKPGRIDLIIGADVYTHILQNGVIKIDGLLGQKTDFGWIVSGCKKSKGKETIVATTIEIKELDRYWEVEEEEKDDIESEICENKFIKTTKKDSDGRYIVSIPFKEDVTLGDSKKQAIARYMNLEKKLKRNEKLKVDYTKFMNEYMDLGHMIEVSDEGKYFLPHQAVIRDSSLTTKLRVVFDASAKTTNNKSLNDIMWVGPRVQKDIFDIIIKWRKWEFVVSADIEKMYRQIKIDNNDQKYQYILWRNSPKEKIKTYKLTTVTYGTASAPYLATRVLVDIADKCKNQVISAIIRNDFYMDDLMTGADSVEEANKLITLIPHELQKVGFNLRKWISNNSKILTTVEDTGDNKVLNIIENECVKTLGLKWEPQKDLFKFSVNC…	1748	139
48	GSWPWNSANDNACEIQPLKPDK	32	22	embryo.dev-embryo	4.8963e-07	0	False	EBZ_32.1_sets_embryo.dev-embryo	105.0	60.0	74.0	4.0	74.0	1.0	1.0	32.1	intergenic;antisense;sense;exonic;intronic;fiveUTR;threeUTR;	TINVDQKKWKNFKLADPDFNKPGRIDLIIGADVYTHILQNGVIKIDGLLGQKTDFGWIVSGCKKSKGKETIVATTIEIKELDRYWEVEEEEKDDIESEICENKFIKTTKKDSDGRYIVSIPFKEDVTLGDSKKQAIARYMNLEKKLKRNEKLKVDYTKFMNEYMDLGHMIEVSDEGKYFLPHQAVIRDSSLTTKLRVVFDASAKTTNNKSLNDIMWVGPRVQKDIFDIIIKWRKWEFVVSADIEKMYRQIKIDNNDQKYQYILWRNSPKEKIKTYKLTTVTYGTASAPYLATRVLVDIADKCKNQVISAIIRNDFYMDDLMTGADSVEEANKLITLIPHELQKVGFNLRKWISNNSKILTTVEDTGDNKVLNIIENECVKTLGLKWEPQKDLFKFSVNC…	1748	139
49	GVDSNQLINCDFWWK	32	15	embryo	9.4451e-13	0	False	EBZ_32.1_sets_embryo.dev-embryo	105.0	60.0	74.0	4.0	74.0	1.0	1.0	32.1	intergenic;antisense;sense;exonic;intronic;fiveUTR;threeUTR;	TINVDQKKWKNFKLADPDFNKPGRIDLIIGADVYTHILQNGVIKIDGLLGQKTDFGWIVSGCKKSKGKETIVATTIEIKELDRYWEVEEEEKDDIESEICENKFIKTTKKDSDGRYIVSIPFKEDVTLGDSKKQAIARYMNLEKKLKRNEKLKVDYTKFMNEYMDLGHMIEVSDEGKYFLPHQAVIRDSSLTTKLRVVFDASAKTTNNKSLNDIMWVGPRVQKDIFDIIIKWRKWEFVVSADIEKMYRQIKIDNNDQKYQYILWRNSPKEKIKTYKLTTVTYGTASAPYLATRVLVDIADKCKNQVISAIIRNDFYMDDLMTGADSVEEANKLITLIPHELQKVGFNLRKWISNNSKILTTVEDTGDNKVLNIIENECVKTLGLKWEPQKDLFKFSVNC…	1748	139
50	GVDSNQLINCDFWWKGPK	32	18	embryo.dev-embryo	0.19559	0	False	EBZ_32.1_sets_embryo.dev-embryo	105.0	60.0	74.0	4.0	74.0	1.0	1.0	32.1	intergenic;antisense;sense;exonic;intronic;fiveUTR;threeUTR;	TINVDQKKWKNFKLADPDFNKPGRIDLIIGADVYTHILQNGVIKIDGLLGQKTDFGWIVSGCKKSKGKETIVATTIEIKELDRYWEVEEEEKDDIESEICENKFIKTTKKDSDGRYIVSIPFKEDVTLGDSKKQAIARYMNLEKKLKRNEKLKVDYTKFMNEYMDLGHMIEVSDEGKYFLPHQAVIRDSSLTTKLRVVFDASAKTTNNKSLNDIMWVGPRVQKDIFDIIIKWRKWEFVVSADIEKMYRQIKIDNNDQKYQYILWRNSPKEKIKTYKLTTVTYGTASAPYLATRVLVDIADKCKNQVISAIIRNDFYMDDLMTGADSVEEANKLITLIPHELQKVGFNLRKWISNNSKILTTVEDTGDNKVLNIIENECVKTLGLKWEPQKDLFKFSVNC…	1748	139
51	GYVAVFVCMATK	32	12	embryo	0.16305999999999998	0	False	EBZ_32.1_sets_embryo.dev-embryo	105.0	60.0	74.0	4.0	74.0	1.0	1.0	32.1	intergenic;antisense;sense;exonic;intronic;fiveUTR;threeUTR;	TINVDQKKWKNFKLADPDFNKPGRIDLIIGADVYTHILQNGVIKIDGLLGQKTDFGWIVSGCKKSKGKETIVATTIEIKELDRYWEVEEEEKDDIESEICENKFIKTTKKDSDGRYIVSIPFKEDVTLGDSKKQAIARYMNLEKKLKRNEKLKVDYTKFMNEYMDLGHMIEVSDEGKYFLPHQAVIRDSSLTTKLRVVFDASAKTTNNKSLNDIMWVGPRVQKDIFDIIIKWRKWEFVVSADIEKMYRQIKIDNNDQKYQYILWRNSPKEKIKTYKLTTVTYGTASAPYLATRVLVDIADKCKNQVISAIIRNDFYMDDLMTGADSVEEANKLITLIPHELQKVGFNLRKWISNNSKILTTVEDTGDNKVLNIIENECVKTLGLKWEPQKDLFKFSVNC…	1748	139
52	HPIILEK	32	7	embryo.dev-embryo	0.018036	0	False	EBZ_32.1_sets_embryo.dev-embryo	105.0	60.0	74.0	4.0	74.0	1.0	1.0	32.1	intergenic;antisense;sense;exonic;intronic;fiveUTR;threeUTR;	TINVDQKKWKNFKLADPDFNKPGRIDLIIGADVYTHILQNGVIKIDGLLGQKTDFGWIVSGCKKSKGKETIVATTIEIKELDRYWEVEEEEKDDIESEICENKFIKTTKKDSDGRYIVSIPFKEDVTLGDSKKQAIARYMNLEKKLKRNEKLKVDYTKFMNEYMDLGHMIEVSDEGKYFLPHQAVIRDSSLTTKLRVVFDASAKTTNNKSLNDIMWVGPRVQKDIFDIIIKWRKWEFVVSADIEKMYRQIKIDNNDQKYQYILWRNSPKEKIKTYKLTTVTYGTASAPYLATRVLVDIADKCKNQVISAIIRNDFYMDDLMTGADSVEEANKLITLIPHELQKVGFNLRKWISNNSKILTTVEDTGDNKVLNIIENECVKTLGLKWEPQKDLFKFSVNC…	1748	139
53	HPSKLFR	32	7	embryo	0.11352	0	False	EBZ_32.1_sets_embryo.dev-embryo	105.0	60.0	74.0	4.0	74.0	1.0	1.0	32.1	intergenic;antisense;sense;exonic;intronic;fiveUTR;threeUTR;	TINVDQKKWKNFKLADPDFNKPGRIDLIIGADVYTHILQNGVIKIDGLLGQKTDFGWIVSGCKKSKGKETIVATTIEIKELDRYWEVEEEEKDDIESEICENKFIKTTKKDSDGRYIVSIPFKEDVTLGDSKKQAIARYMNLEKKLKRNEKLKVDYTKFMNEYMDLGHMIEVSDEGKYFLPHQAVIRDSSLTTKLRVVFDASAKTTNNKSLNDIMWVGPRVQKDIFDIIIKWRKWEFVVSADIEKMYRQIKIDNNDQKYQYILWRNSPKEKIKTYKLTTVTYGTASAPYLATRVLVDIADKCKNQVISAIIRNDFYMDDLMTGADSVEEANKLITLIPHELQKVGFNLRKWISNNSKILTTVEDTGDNKVLNIIENECVKTLGLKWEPQKDLFKFSVNC…	1748	139
54	IAETVVIKK	32	9	embryo	0.11359	0	False	EBZ_32.1_sets_embryo.dev-embryo	105.0	60.0	74.0	4.0	74.0	1.0	1.0	32.1	intergenic;antisense;sense;exonic;intronic;fiveUTR;threeUTR;	TINVDQKKWKNFKLADPDFNKPGRIDLIIGADVYTHILQNGVIKIDGLLGQKTDFGWIVSGCKKSKGKETIVATTIEIKELDRYWEVEEEEKDDIESEICENKFIKTTKKDSDGRYIVSIPFKEDVTLGDSKKQAIARYMNLEKKLKRNEKLKVDYTKFMNEYMDLGHMIEVSDEGKYFLPHQAVIRDSSLTTKLRVVFDASAKTTNNKSLNDIMWVGPRVQKDIFDIIIKWRKWEFVVSADIEKMYRQIKIDNNDQKYQYILWRNSPKEKIKTYKLTTVTYGTASAPYLATRVLVDIADKCKNQVISAIIRNDFYMDDLMTGADSVEEANKLITLIPHELQKVGFNLRKWISNNSKILTTVEDTGDNKVLNIIENECVKTLGLKWEPQKDLFKFSVNC…	1748	139
55	ICKGSWPWNSANDNACEIQPLKPDK	32	25	embryo	0.40127	0	False	EBZ_32.1_sets_embryo.dev-embryo	105.0	60.0	74.0	4.0	74.0	1.0	1.0	32.1	intergenic;antisense;sense;exonic;intronic;fiveUTR;threeUTR;	TINVDQKKWKNFKLADPDFNKPGRIDLIIGADVYTHILQNGVIKIDGLLGQKTDFGWIVSGCKKSKGKETIVATTIEIKELDRYWEVEEEEKDDIESEICENKFIKTTKKDSDGRYIVSIPFKEDVTLGDSKKQAIARYMNLEKKLKRNEKLKVDYTKFMNEYMDLGHMIEVSDEGKYFLPHQAVIRDSSLTTKLRVVFDASAKTTNNKSLNDIMWVGPRVQKDIFDIIIKWRKWEFVVSADIEKMYRQIKIDNNDQKYQYILWRNSPKEKIKTYKLTTVTYGTASAPYLATRVLVDIADKCKNQVISAIIRNDFYMDDLMTGADSVEEANKLITLIPHELQKVGFNLRKWISNNSKILTTVEDTGDNKVLNIIENECVKTLGLKWEPQKDLFKFSVNC…	1748	139
56	IDDPIYELIER	32	11	embryo	0.42274	0	False	EBZ_32.1_sets_embryo.dev-embryo	105.0	60.0	74.0	4.0	74.0	1.0	1.0	32.1	intergenic;antisense;sense;exonic;intronic;fiveUTR;threeUTR;	TINVDQKKWKNFKLADPDFNKPGRIDLIIGADVYTHILQNGVIKIDGLLGQKTDFGWIVSGCKKSKGKETIVATTIEIKELDRYWEVEEEEKDDIESEICENKFIKTTKKDSDGRYIVSIPFKEDVTLGDSKKQAIARYMNLEKKLKRNEKLKVDYTKFMNEYMDLGHMIEVSDEGKYFLPHQAVIRDSSLTTKLRVVFDASAKTTNNKSLNDIMWVGPRVQKDIFDIIIKWRKWEFVVSADIEKMYRQIKIDNNDQKYQYILWRNSPKEKIKTYKLTTVTYGTASAPYLATRVLVDIADKCKNQVISAIIRNDFYMDDLMTGADSVEEANKLITLIPHELQKVGFNLRKWISNNSKILTTVEDTGDNKVLNIIENECVKTLGLKWEPQKDLFKFSVNC…	1748	139
57	IDDPIYELIERYSSIEKLIR	32	20	embryo	0.16012	0	False	EBZ_32.1_sets_embryo.dev-embryo	105.0	60.0	74.0	4.0	74.0	1.0	1.0	32.1	intergenic;antisense;sense;exonic;intronic;fiveUTR;threeUTR;	TINVDQKKWKNFKLADPDFNKPGRIDLIIGADVYTHILQNGVIKIDGLLGQKTDFGWIVSGCKKSKGKETIVATTIEIKELDRYWEVEEEEKDDIESEICENKFIKTTKKDSDGRYIVSIPFKEDVTLGDSKKQAIARYMNLEKKLKRNEKLKVDYTKFMNEYMDLGHMIEVSDEGKYFLPHQAVIRDSSLTTKLRVVFDASAKTTNNKSLNDIMWVGPRVQKDIFDIIIKWRKWEFVVSADIEKMYRQIKIDNNDQKYQYILWRNSPKEKIKTYKLTTVTYGTASAPYLATRVLVDIADKCKNQVISAIIRNDFYMDDLMTGADSVEEANKLITLIPHELQKVGFNLRKWISNNSKILTTVEDTGDNKVLNIIENECVKTLGLKWEPQKDLFKFSVNC…	1748	139
58	IDGLLGQK	32	8	embryo.dev-embryo	0.0013125	0	False	EBZ_32.1_sets_embryo.dev-embryo	105.0	60.0	74.0	4.0	74.0	1.0	1.0	32.1	intergenic;antisense;sense;exonic;intronic;fiveUTR;threeUTR;	TINVDQKKWKNFKLADPDFNKPGRIDLIIGADVYTHILQNGVIKIDGLLGQKTDFGWIVSGCKKSKGKETIVATTIEIKELDRYWEVEEEEKDDIESEICENKFIKTTKKDSDGRYIVSIPFKEDVTLGDSKKQAIARYMNLEKKLKRNEKLKVDYTKFMNEYMDLGHMIEVSDEGKYFLPHQAVIRDSSLTTKLRVVFDASAKTTNNKSLNDIMWVGPRVQKDIFDIIIKWRKWEFVVSADIEKMYRQIKIDNNDQKYQYILWRNSPKEKIKTYKLTTVTYGTASAPYLATRVLVDIADKCKNQVISAIIRNDFYMDDLMTGADSVEEANKLITLIPHELQKVGFNLRKWISNNSKILTTVEDTGDNKVLNIIENECVKTLGLKWEPQKDLFKFSVNC…	1748	139
59	IDNNDQKYQYILWRNSPK	32	18	embryo	0.40802	0	False	EBZ_32.1_sets_embryo.dev-embryo	105.0	60.0	74.0	4.0	74.0	1.0	1.0	32.1	intergenic;antisense;sense;exonic;intronic;fiveUTR;threeUTR;	TINVDQKKWKNFKLADPDFNKPGRIDLIIGADVYTHILQNGVIKIDGLLGQKTDFGWIVSGCKKSKGKETIVATTIEIKELDRYWEVEEEEKDDIESEICENKFIKTTKKDSDGRYIVSIPFKEDVTLGDSKKQAIARYMNLEKKLKRNEKLKVDYTKFMNEYMDLGHMIEVSDEGKYFLPHQAVIRDSSLTTKLRVVFDASAKTTNNKSLNDIMWVGPRVQKDIFDIIIKWRKWEFVVSADIEKMYRQIKIDNNDQKYQYILWRNSPKEKIKTYKLTTVTYGTASAPYLATRVLVDIADKCKNQVISAIIRNDFYMDDLMTGADSVEEANKLITLIPHELQKVGFNLRKWISNNSKILTTVEDTGDNKVLNIIENECVKTLGLKWEPQKDLFKFSVNC…	1748	139
60	IDWHFIPPAGPHFGGIWEAGVK	32	22	embryo	0.25035	0	False	EBZ_32.1_sets_embryo.dev-embryo	105.0	60.0	74.0	4.0	74.0	1.0	1.0	32.1	intergenic;antisense;sense;exonic;intronic;fiveUTR;threeUTR;	TINVDQKKWKNFKLADPDFNKPGRIDLIIGADVYTHILQNGVIKIDGLLGQKTDFGWIVSGCKKSKGKETIVATTIEIKELDRYWEVEEEEKDDIESEICENKFIKTTKKDSDGRYIVSIPFKEDVTLGDSKKQAIARYMNLEKKLKRNEKLKVDYTKFMNEYMDLGHMIEVSDEGKYFLPHQAVIRDSSLTTKLRVVFDASAKTTNNKSLNDIMWVGPRVQKDIFDIIIKWRKWEFVVSADIEKMYRQIKIDNNDQKYQYILWRNSPKEKIKTYKLTTVTYGTASAPYLATRVLVDIADKCKNQVISAIIRNDFYMDDLMTGADSVEEANKLITLIPHELQKVGFNLRKWISNNSKILTTVEDTGDNKVLNIIENECVKTLGLKWEPQKDLFKFSVNC…	1748	139
61	IFDPLGWLAPVTVSGK	32	16	embryo.dev-embryo	7.8858e-06	0	False	EBZ_32.1_sets_embryo.dev-embryo	105.0	60.0	74.0	4.0	74.0	1.0	1.0	32.1	intergenic;antisense;sense;exonic;intronic;fiveUTR;threeUTR;	TINVDQKKWKNFKLADPDFNKPGRIDLIIGADVYTHILQNGVIKIDGLLGQKTDFGWIVSGCKKSKGKETIVATTIEIKELDRYWEVEEEEKDDIESEICENKFIKTTKKDSDGRYIVSIPFKEDVTLGDSKKQAIARYMNLEKKLKRNEKLKVDYTKFMNEYMDLGHMIEVSDEGKYFLPHQAVIRDSSLTTKLRVVFDASAKTTNNKSLNDIMWVGPRVQKDIFDIIIKWRKWEFVVSADIEKMYRQIKIDNNDQKYQYILWRNSPKEKIKTYKLTTVTYGTASAPYLATRVLVDIADKCKNQVISAIIRNDFYMDDLMTGADSVEEANKLITLIPHELQKVGFNLRKWISNNSKILTTVEDTGDNKVLNIIENECVKTLGLKWEPQKDLFKFSVNC…	1748	139
62	IGNLDRWR	32	8	embryo	0.97071	0	False	EBZ_32.1_sets_embryo.dev-embryo	105.0	60.0	74.0	4.0	74.0	1.0	1.0	32.1	intergenic;antisense;sense;exonic;intronic;fiveUTR;threeUTR;	TINVDQKKWKNFKLADPDFNKPGRIDLIIGADVYTHILQNGVIKIDGLLGQKTDFGWIVSGCKKSKGKETIVATTIEIKELDRYWEVEEEEKDDIESEICENKFIKTTKKDSDGRYIVSIPFKEDVTLGDSKKQAIARYMNLEKKLKRNEKLKVDYTKFMNEYMDLGHMIEVSDEGKYFLPHQAVIRDSSLTTKLRVVFDASAKTTNNKSLNDIMWVGPRVQKDIFDIIIKWRKWEFVVSADIEKMYRQIKIDNNDQKYQYILWRNSPKEKIKTYKLTTVTYGTASAPYLATRVLVDIADKCKNQVISAIIRNDFYMDDLMTGADSVEEANKLITLIPHELQKVGFNLRKWISNNSKILTTVEDTGDNKVLNIIENECVKTLGLKWEPQKDLFKFSVNC…	1748	139
63	IGNLDRWRLIQK	32	12	embryo	0.36961	0	False	EBZ_32.1_sets_embryo.dev-embryo	105.0	60.0	74.0	4.0	74.0	1.0	1.0	32.1	intergenic;antisense;sense;exonic;intronic;fiveUTR;threeUTR;	TINVDQKKWKNFKLADPDFNKPGRIDLIIGADVYTHILQNGVIKIDGLLGQKTDFGWIVSGCKKSKGKETIVATTIEIKELDRYWEVEEEEKDDIESEICENKFIKTTKKDSDGRYIVSIPFKEDVTLGDSKKQAIARYMNLEKKLKRNEKLKVDYTKFMNEYMDLGHMIEVSDEGKYFLPHQAVIRDSSLTTKLRVVFDASAKTTNNKSLNDIMWVGPRVQKDIFDIIIKWRKWEFVVSADIEKMYRQIKIDNNDQKYQYILWRNSPKEKIKTYKLTTVTYGTASAPYLATRVLVDIADKCKNQVISAIIRNDFYMDDLMTGADSVEEANKLITLIPHELQKVGFNLRKWISNNSKILTTVEDTGDNKVLNIIENECVKTLGLKWEPQKDLFKFSVNC…	1748	139
64	IIAYINR	32	7	embryo.dev-embryo	0.0099087	0	False	EBZ_32.1_sets_embryo.dev-embryo	105.0	60.0	74.0	4.0	74.0	1.0	1.0	32.1	intergenic;antisense;sense;exonic;intronic;fiveUTR;threeUTR;	TINVDQKKWKNFKLADPDFNKPGRIDLIIGADVYTHILQNGVIKIDGLLGQKTDFGWIVSGCKKSKGKETIVATTIEIKELDRYWEVEEEEKDDIESEICENKFIKTTKKDSDGRYIVSIPFKEDVTLGDSKKQAIARYMNLEKKLKRNEKLKVDYTKFMNEYMDLGHMIEVSDEGKYFLPHQAVIRDSSLTTKLRVVFDASAKTTNNKSLNDIMWVGPRVQKDIFDIIIKWRKWEFVVSADIEKMYRQIKIDNNDQKYQYILWRNSPKEKIKTYKLTTVTYGTASAPYLATRVLVDIADKCKNQVISAIIRNDFYMDDLMTGADSVEEANKLITLIPHELQKVGFNLRKWISNNSKILTTVEDTGDNKVLNIIENECVKTLGLKWEPQKDLFKFSVNC…	1748	139
65	IIAYINRFVQMK	32	12	embryo	1.0987	0	False	EBZ_32.1_sets_embryo.dev-embryo	105.0	60.0	74.0	4.0	74.0	1.0	1.0	32.1	intergenic;antisense;sense;exonic;intronic;fiveUTR;threeUTR;	TINVDQKKWKNFKLADPDFNKPGRIDLIIGADVYTHILQNGVIKIDGLLGQKTDFGWIVSGCKKSKGKETIVATTIEIKELDRYWEVEEEEKDDIESEICENKFIKTTKKDSDGRYIVSIPFKEDVTLGDSKKQAIARYMNLEKKLKRNEKLKVDYTKFMNEYMDLGHMIEVSDEGKYFLPHQAVIRDSSLTTKLRVVFDASAKTTNNKSLNDIMWVGPRVQKDIFDIIIKWRKWEFVVSADIEKMYRQIKIDNNDQKYQYILWRNSPKEKIKTYKLTTVTYGTASAPYLATRVLVDIADKCKNQVISAIIRNDFYMDDLMTGADSVEEANKLITLIPHELQKVGFNLRKWISNNSKILTTVEDTGDNKVLNIIENECVKTLGLKWEPQKDLFKFSVNC…	1748	139
66	IIWDPLK	32	7	embryo.dev-embryo	0.036224	0	False	EBZ_32.1_sets_embryo.dev-embryo	105.0	60.0	74.0	4.0	74.0	1.0	1.0	32.1	intergenic;antisense;sense;exonic;intronic;fiveUTR;threeUTR;	TINVDQKKWKNFKLADPDFNKPGRIDLIIGADVYTHILQNGVIKIDGLLGQKTDFGWIVSGCKKSKGKETIVATTIEIKELDRYWEVEEEEKDDIESEICENKFIKTTKKDSDGRYIVSIPFKEDVTLGDSKKQAIARYMNLEKKLKRNEKLKVDYTKFMNEYMDLGHMIEVSDEGKYFLPHQAVIRDSSLTTKLRVVFDASAKTTNNKSLNDIMWVGPRVQKDIFDIIIKWRKWEFVVSADIEKMYRQIKIDNNDQKYQYILWRNSPKEKIKTYKLTTVTYGTASAPYLATRVLVDIADKCKNQVISAIIRNDFYMDDLMTGADSVEEANKLITLIPHELQKVGFNLRKWISNNSKILTTVEDTGDNKVLNIIENECVKTLGLKWEPQKDLFKFSVNC…	1748	139
67	ILSLNPFLDK	32	10	embryo	0.43189	0	False	EBZ_32.1_sets_embryo.dev-embryo	105.0	60.0	74.0	4.0	74.0	1.0	1.0	32.1	intergenic;antisense;sense;exonic;intronic;fiveUTR;threeUTR;	TINVDQKKWKNFKLADPDFNKPGRIDLIIGADVYTHILQNGVIKIDGLLGQKTDFGWIVSGCKKSKGKETIVATTIEIKELDRYWEVEEEEKDDIESEICENKFIKTTKKDSDGRYIVSIPFKEDVTLGDSKKQAIARYMNLEKKLKRNEKLKVDYTKFMNEYMDLGHMIEVSDEGKYFLPHQAVIRDSSLTTKLRVVFDASAKTTNNKSLNDIMWVGPRVQKDIFDIIIKWRKWEFVVSADIEKMYRQIKIDNNDQKYQYILWRNSPKEKIKTYKLTTVTYGTASAPYLATRVLVDIADKCKNQVISAIIRNDFYMDDLMTGADSVEEANKLITLIPHELQKVGFNLRKWISNNSKILTTVEDTGDNKVLNIIENECVKTLGLKWEPQKDLFKFSVNC…	1748	139
68	ILSLNPFLDKDGVLR	32	15	embryo.dev-embryo	3.0958e-07	0	False	EBZ_32.1_sets_embryo.dev-embryo	105.0	60.0	74.0	4.0	74.0	1.0	1.0	32.1	intergenic;antisense;sense;exonic;intronic;fiveUTR;threeUTR;	TINVDQKKWKNFKLADPDFNKPGRIDLIIGADVYTHILQNGVIKIDGLLGQKTDFGWIVSGCKKSKGKETIVATTIEIKELDRYWEVEEEEKDDIESEICENKFIKTTKKDSDGRYIVSIPFKEDVTLGDSKKQAIARYMNLEKKLKRNEKLKVDYTKFMNEYMDLGHMIEVSDEGKYFLPHQAVIRDSSLTTKLRVVFDASAKTTNNKSLNDIMWVGPRVQKDIFDIIIKWRKWEFVVSADIEKMYRQIKIDNNDQKYQYILWRNSPKEKIKTYKLTTVTYGTASAPYLATRVLVDIADKCKNQVISAIIRNDFYMDDLMTGADSVEEANKLITLIPHELQKVGFNLRKWISNNSKILTTVEDTGDNKVLNIIENECVKTLGLKWEPQKDLFKFSVNC…	1748	139
69	ILTTVEDTGDNK	32	12	embryo	4.5966000000000014e-05	0	False	EBZ_32.1_sets_embryo.dev-embryo	105.0	60.0	74.0	4.0	74.0	1.0	1.0	32.1	intergenic;antisense;sense;exonic;intronic;fiveUTR;threeUTR;	TINVDQKKWKNFKLADPDFNKPGRIDLIIGADVYTHILQNGVIKIDGLLGQKTDFGWIVSGCKKSKGKETIVATTIEIKELDRYWEVEEEEKDDIESEICENKFIKTTKKDSDGRYIVSIPFKEDVTLGDSKKQAIARYMNLEKKLKRNEKLKVDYTKFMNEYMDLGHMIEVSDEGKYFLPHQAVIRDSSLTTKLRVVFDASAKTTNNKSLNDIMWVGPRVQKDIFDIIIKWRKWEFVVSADIEKMYRQIKIDNNDQKYQYILWRNSPKEKIKTYKLTTVTYGTASAPYLATRVLVDIADKCKNQVISAIIRNDFYMDDLMTGADSVEEANKLITLIPHELQKVGFNLRKWISNNSKILTTVEDTGDNKVLNIIENECVKTLGLKWEPQKDLFKFSVNC…	1748	139
70	ILTTVEDTGDNKVLNIIENECVK	32	23	embryo.dev-embryo	7.1586e-05	0	False	EBZ_32.1_sets_embryo.dev-embryo	105.0	60.0	74.0	4.0	74.0	1.0	1.0	32.1	intergenic;antisense;sense;exonic;intronic;fiveUTR;threeUTR;	TINVDQKKWKNFKLADPDFNKPGRIDLIIGADVYTHILQNGVIKIDGLLGQKTDFGWIVSGCKKSKGKETIVATTIEIKELDRYWEVEEEEKDDIESEICENKFIKTTKKDSDGRYIVSIPFKEDVTLGDSKKQAIARYMNLEKKLKRNEKLKVDYTKFMNEYMDLGHMIEVSDEGKYFLPHQAVIRDSSLTTKLRVVFDASAKTTNNKSLNDIMWVGPRVQKDIFDIIIKWRKWEFVVSADIEKMYRQIKIDNNDQKYQYILWRNSPKEKIKTYKLTTVTYGTASAPYLATRVLVDIADKCKNQVISAIIRNDFYMDDLMTGADSVEEANKLITLIPHELQKVGFNLRKWISNNSKILTTVEDTGDNKVLNIIENECVKTLGLKWEPQKDLFKFSVNC…	1748	139
71	IPRWINSNSSSVIQIHGFADASEK	32	24	embryo	0.13982999999999998	0	False	EBZ_32.1_sets_embryo.dev-embryo	105.0	60.0	74.0	4.0	74.0	1.0	1.0	32.1	intergenic;antisense;sense;exonic;intronic;fiveUTR;threeUTR;	TINVDQKKWKNFKLADPDFNKPGRIDLIIGADVYTHILQNGVIKIDGLLGQKTDFGWIVSGCKKSKGKETIVATTIEIKELDRYWEVEEEEKDDIESEICENKFIKTTKKDSDGRYIVSIPFKEDVTLGDSKKQAIARYMNLEKKLKRNEKLKVDYTKFMNEYMDLGHMIEVSDEGKYFLPHQAVIRDSSLTTKLRVVFDASAKTTNNKSLNDIMWVGPRVQKDIFDIIIKWRKWEFVVSADIEKMYRQIKIDNNDQKYQYILWRNSPKEKIKTYKLTTVTYGTASAPYLATRVLVDIADKCKNQVISAIIRNDFYMDDLMTGADSVEEANKLITLIPHELQKVGFNLRKWISNNSKILTTVEDTGDNKVLNIIENECVKTLGLKWEPQKDLFKFSVNC…	1748	139
72	IQAGIISLLIDINHGR	32	16	embryo.dev-embryo	0.00022809	0	False	EBZ_32.1_sets_embryo.dev-embryo	105.0	60.0	74.0	4.0	74.0	1.0	1.0	32.1	intergenic;antisense;sense;exonic;intronic;fiveUTR;threeUTR;	TINVDQKKWKNFKLADPDFNKPGRIDLIIGADVYTHILQNGVIKIDGLLGQKTDFGWIVSGCKKSKGKETIVATTIEIKELDRYWEVEEEEKDDIESEICENKFIKTTKKDSDGRYIVSIPFKEDVTLGDSKKQAIARYMNLEKKLKRNEKLKVDYTKFMNEYMDLGHMIEVSDEGKYFLPHQAVIRDSSLTTKLRVVFDASAKTTNNKSLNDIMWVGPRVQKDIFDIIIKWRKWEFVVSADIEKMYRQIKIDNNDQKYQYILWRNSPKEKIKTYKLTTVTYGTASAPYLATRVLVDIADKCKNQVISAIIRNDFYMDDLMTGADSVEEANKLITLIPHELQKVGFNLRKWISNNSKILTTVEDTGDNKVLNIIENECVKTLGLKWEPQKDLFKFSVNC…	1748	139
73	IQQSLSENLVIPGK	32	14	embryo	0.0010889	0	False	EBZ_32.1_sets_embryo.dev-embryo	105.0	60.0	74.0	4.0	74.0	1.0	1.0	32.1	intergenic;antisense;sense;exonic;intronic;fiveUTR;threeUTR;	TINVDQKKWKNFKLADPDFNKPGRIDLIIGADVYTHILQNGVIKIDGLLGQKTDFGWIVSGCKKSKGKETIVATTIEIKELDRYWEVEEEEKDDIESEICENKFIKTTKKDSDGRYIVSIPFKEDVTLGDSKKQAIARYMNLEKKLKRNEKLKVDYTKFMNEYMDLGHMIEVSDEGKYFLPHQAVIRDSSLTTKLRVVFDASAKTTNNKSLNDIMWVGPRVQKDIFDIIIKWRKWEFVVSADIEKMYRQIKIDNNDQKYQYILWRNSPKEKIKTYKLTTVTYGTASAPYLATRVLVDIADKCKNQVISAIIRNDFYMDDLMTGADSVEEANKLITLIPHELQKVGFNLRKWISNNSKILTTVEDTGDNKVLNIIENECVKTLGLKWEPQKDLFKFSVNC…	1748	139
74	IQQSLSENLVIPGKR	32	15	embryo.dev-embryo	6.8936e-12	0	False	EBZ_32.1_sets_embryo.dev-embryo	105.0	60.0	74.0	4.0	74.0	1.0	1.0	32.1	intergenic;antisense;sense;exonic;intronic;fiveUTR;threeUTR;	TINVDQKKWKNFKLADPDFNKPGRIDLIIGADVYTHILQNGVIKIDGLLGQKTDFGWIVSGCKKSKGKETIVATTIEIKELDRYWEVEEEEKDDIESEICENKFIKTTKKDSDGRYIVSIPFKEDVTLGDSKKQAIARYMNLEKKLKRNEKLKVDYTKFMNEYMDLGHMIEVSDEGKYFLPHQAVIRDSSLTTKLRVVFDASAKTTNNKSLNDIMWVGPRVQKDIFDIIIKWRKWEFVVSADIEKMYRQIKIDNNDQKYQYILWRNSPKEKIKTYKLTTVTYGTASAPYLATRVLVDIADKCKNQVISAIIRNDFYMDDLMTGADSVEEANKLITLIPHELQKVGFNLRKWISNNSKILTTVEDTGDNKVLNIIENECVKTLGLKWEPQKDLFKFSVNC…	1748	139
75	KDFWVKWK	32	8	embryo	0.29234	0	False	EBZ_32.1_sets_embryo.dev-embryo	105.0	60.0	74.0	4.0	74.0	1.0	1.0	32.1	intergenic;antisense;sense;exonic;intronic;fiveUTR;threeUTR;	TINVDQKKWKNFKLADPDFNKPGRIDLIIGADVYTHILQNGVIKIDGLLGQKTDFGWIVSGCKKSKGKETIVATTIEIKELDRYWEVEEEEKDDIESEICENKFIKTTKKDSDGRYIVSIPFKEDVTLGDSKKQAIARYMNLEKKLKRNEKLKVDYTKFMNEYMDLGHMIEVSDEGKYFLPHQAVIRDSSLTTKLRVVFDASAKTTNNKSLNDIMWVGPRVQKDIFDIIIKWRKWEFVVSADIEKMYRQIKIDNNDQKYQYILWRNSPKEKIKTYKLTTVTYGTASAPYLATRVLVDIADKCKNQVISAIIRNDFYMDDLMTGADSVEEANKLITLIPHELQKVGFNLRKWISNNSKILTTVEDTGDNKVLNIIENECVKTLGLKWEPQKDLFKFSVNC…	1748	139
76	KLDQELFNAIQENITIAAQLEKDR	32	24	embryo	0.14686	0	False	EBZ_32.1_sets_embryo.dev-embryo	105.0	60.0	74.0	4.0	74.0	1.0	1.0	32.1	intergenic;antisense;sense;exonic;intronic;fiveUTR;threeUTR;	TINVDQKKWKNFKLADPDFNKPGRIDLIIGADVYTHILQNGVIKIDGLLGQKTDFGWIVSGCKKSKGKETIVATTIEIKELDRYWEVEEEEKDDIESEICENKFIKTTKKDSDGRYIVSIPFKEDVTLGDSKKQAIARYMNLEKKLKRNEKLKVDYTKFMNEYMDLGHMIEVSDEGKYFLPHQAVIRDSSLTTKLRVVFDASAKTTNNKSLNDIMWVGPRVQKDIFDIIIKWRKWEFVVSADIEKMYRQIKIDNNDQKYQYILWRNSPKEKIKTYKLTTVTYGTASAPYLATRVLVDIADKCKNQVISAIIRNDFYMDDLMTGADSVEEANKLITLIPHELQKVGFNLRKWISNNSKILTTVEDTGDNKVLNIIENECVKTLGLKWEPQKDLFKFSVNC…	1748	139
77	KLKNTEWNHVK	32	11	embryo	0.35225	0	False	EBZ_32.1_sets_embryo.dev-embryo	105.0	60.0	74.0	4.0	74.0	1.0	1.0	32.1	intergenic;antisense;sense;exonic;intronic;fiveUTR;threeUTR;	TINVDQKKWKNFKLADPDFNKPGRIDLIIGADVYTHILQNGVIKIDGLLGQKTDFGWIVSGCKKSKGKETIVATTIEIKELDRYWEVEEEEKDDIESEICENKFIKTTKKDSDGRYIVSIPFKEDVTLGDSKKQAIARYMNLEKKLKRNEKLKVDYTKFMNEYMDLGHMIEVSDEGKYFLPHQAVIRDSSLTTKLRVVFDASAKTTNNKSLNDIMWVGPRVQKDIFDIIIKWRKWEFVVSADIEKMYRQIKIDNNDQKYQYILWRNSPKEKIKTYKLTTVTYGTASAPYLATRVLVDIADKCKNQVISAIIRNDFYMDDLMTGADSVEEANKLITLIPHELQKVGFNLRKWISNNSKILTTVEDTGDNKVLNIIENECVKTLGLKWEPQKDLFKFSVNC…	1748	139
78	KQQEYQFR	32	8	embryo.dev-embryo	0.17857	0	False	EBZ_32.1_sets_embryo.dev-embryo	105.0	60.0	74.0	4.0	74.0	1.0	1.0	32.1	intergenic;antisense;sense;exonic;intronic;fiveUTR;threeUTR;	TINVDQKKWKNFKLADPDFNKPGRIDLIIGADVYTHILQNGVIKIDGLLGQKTDFGWIVSGCKKSKGKETIVATTIEIKELDRYWEVEEEEKDDIESEICENKFIKTTKKDSDGRYIVSIPFKEDVTLGDSKKQAIARYMNLEKKLKRNEKLKVDYTKFMNEYMDLGHMIEVSDEGKYFLPHQAVIRDSSLTTKLRVVFDASAKTTNNKSLNDIMWVGPRVQKDIFDIIIKWRKWEFVVSADIEKMYRQIKIDNNDQKYQYILWRNSPKEKIKTYKLTTVTYGTASAPYLATRVLVDIADKCKNQVISAIIRNDFYMDDLMTGADSVEEANKLITLIPHELQKVGFNLRKWISNNSKILTTVEDTGDNKVLNIIENECVKTLGLKWEPQKDLFKFSVNC…	1748	139
79	KSSWLFK	32	7	embryo.dev-embryo	0.5522	0	False	EBZ_32.1_sets_embryo.dev-embryo	105.0	60.0	74.0	4.0	74.0	1.0	1.0	32.1	intergenic;antisense;sense;exonic;intronic;fiveUTR;threeUTR;	TINVDQKKWKNFKLADPDFNKPGRIDLIIGADVYTHILQNGVIKIDGLLGQKTDFGWIVSGCKKSKGKETIVATTIEIKELDRYWEVEEEEKDDIESEICENKFIKTTKKDSDGRYIVSIPFKEDVTLGDSKKQAIARYMNLEKKLKRNEKLKVDYTKFMNEYMDLGHMIEVSDEGKYFLPHQAVIRDSSLTTKLRVVFDASAKTTNNKSLNDIMWVGPRVQKDIFDIIIKWRKWEFVVSADIEKMYRQIKIDNNDQKYQYILWRNSPKEKIKTYKLTTVTYGTASAPYLATRVLVDIADKCKNQVISAIIRNDFYMDDLMTGADSVEEANKLITLIPHELQKVGFNLRKWISNNSKILTTVEDTGDNKVLNIIENECVKTLGLKWEPQKDLFKFSVNC…	1748	139
80	KTIPKLELCAAHLLSELIQR	32	20	embryo	0.15222	0	False	EBZ_32.1_sets_embryo.dev-embryo	105.0	60.0	74.0	4.0	74.0	1.0	1.0	32.1	intergenic;antisense;sense;exonic;intronic;fiveUTR;threeUTR;	TINVDQKKWKNFKLADPDFNKPGRIDLIIGADVYTHILQNGVIKIDGLLGQKTDFGWIVSGCKKSKGKETIVATTIEIKELDRYWEVEEEEKDDIESEICENKFIKTTKKDSDGRYIVSIPFKEDVTLGDSKKQAIARYMNLEKKLKRNEKLKVDYTKFMNEYMDLGHMIEVSDEGKYFLPHQAVIRDSSLTTKLRVVFDASAKTTNNKSLNDIMWVGPRVQKDIFDIIIKWRKWEFVVSADIEKMYRQIKIDNNDQKYQYILWRNSPKEKIKTYKLTTVTYGTASAPYLATRVLVDIADKCKNQVISAIIRNDFYMDDLMTGADSVEEANKLITLIPHELQKVGFNLRKWISNNSKILTTVEDTGDNKVLNIIENECVKTLGLKWEPQKDLFKFSVNC…	1748	139
81	KVCERLHSFEEQCSLVLDNMQSQLSELEENNK	32	32	embryo	0.16555999999999998	0	False	EBZ_32.1_sets_embryo.dev-embryo	105.0	60.0	74.0	4.0	74.0	1.0	1.0	32.1	intergenic;antisense;sense;exonic;intronic;fiveUTR;threeUTR;	TINVDQKKWKNFKLADPDFNKPGRIDLIIGADVYTHILQNGVIKIDGLLGQKTDFGWIVSGCKKSKGKETIVATTIEIKELDRYWEVEEEEKDDIESEICENKFIKTTKKDSDGRYIVSIPFKEDVTLGDSKKQAIARYMNLEKKLKRNEKLKVDYTKFMNEYMDLGHMIEVSDEGKYFLPHQAVIRDSSLTTKLRVVFDASAKTTNNKSLNDIMWVGPRVQKDIFDIIIKWRKWEFVVSADIEKMYRQIKIDNNDQKYQYILWRNSPKEKIKTYKLTTVTYGTASAPYLATRVLVDIADKCKNQVISAIIRNDFYMDDLMTGADSVEEANKLITLIPHELQKVGFNLRKWISNNSKILTTVEDTGDNKVLNIIENECVKTLGLKWEPQKDLFKFSVNC…	1748	139
82	KYLRECVTCAR	32	11	embryo	3.7841	0	False	EBZ_32.1_sets_embryo.dev-embryo	105.0	60.0	74.0	4.0	74.0	1.0	1.0	32.1	intergenic;antisense;sense;exonic;intronic;fiveUTR;threeUTR;	TINVDQKKWKNFKLADPDFNKPGRIDLIIGADVYTHILQNGVIKIDGLLGQKTDFGWIVSGCKKSKGKETIVATTIEIKELDRYWEVEEEEKDDIESEICENKFIKTTKKDSDGRYIVSIPFKEDVTLGDSKKQAIARYMNLEKKLKRNEKLKVDYTKFMNEYMDLGHMIEVSDEGKYFLPHQAVIRDSSLTTKLRVVFDASAKTTNNKSLNDIMWVGPRVQKDIFDIIIKWRKWEFVVSADIEKMYRQIKIDNNDQKYQYILWRNSPKEKIKTYKLTTVTYGTASAPYLATRVLVDIADKCKNQVISAIIRNDFYMDDLMTGADSVEEANKLITLIPHELQKVGFNLRKWISNNSKILTTVEDTGDNKVLNIIENECVKTLGLKWEPQKDLFKFSVNC…	1748	139
83	KYWIFGLK	32	8	embryo	0.0067791	0	False	EBZ_32.1_sets_embryo.dev-embryo	105.0	60.0	74.0	4.0	74.0	1.0	1.0	32.1	intergenic;antisense;sense;exonic;intronic;fiveUTR;threeUTR;	TINVDQKKWKNFKLADPDFNKPGRIDLIIGADVYTHILQNGVIKIDGLLGQKTDFGWIVSGCKKSKGKETIVATTIEIKELDRYWEVEEEEKDDIESEICENKFIKTTKKDSDGRYIVSIPFKEDVTLGDSKKQAIARYMNLEKKLKRNEKLKVDYTKFMNEYMDLGHMIEVSDEGKYFLPHQAVIRDSSLTTKLRVVFDASAKTTNNKSLNDIMWVGPRVQKDIFDIIIKWRKWEFVVSADIEKMYRQIKIDNNDQKYQYILWRNSPKEKIKTYKLTTVTYGTASAPYLATRVLVDIADKCKNQVISAIIRNDFYMDDLMTGADSVEEANKLITLIPHELQKVGFNLRKWISNNSKILTTVEDTGDNKVLNIIENECVKTLGLKWEPQKDLFKFSVNC…	1748	139
84	LADPDFNKPGR	32	11	embryo.dev-embryo	7.1587e-05	0	False	EBZ_32.1_sets_embryo.dev-embryo	105.0	60.0	74.0	4.0	74.0	1.0	1.0	32.1	intergenic;antisense;sense;exonic;intronic;fiveUTR;threeUTR;	TINVDQKKWKNFKLADPDFNKPGRIDLIIGADVYTHILQNGVIKIDGLLGQKTDFGWIVSGCKKSKGKETIVATTIEIKELDRYWEVEEEEKDDIESEICENKFIKTTKKDSDGRYIVSIPFKEDVTLGDSKKQAIARYMNLEKKLKRNEKLKVDYTKFMNEYMDLGHMIEVSDEGKYFLPHQAVIRDSSLTTKLRVVFDASAKTTNNKSLNDIMWVGPRVQKDIFDIIIKWRKWEFVVSADIEKMYRQIKIDNNDQKYQYILWRNSPKEKIKTYKLTTVTYGTASAPYLATRVLVDIADKCKNQVISAIIRNDFYMDDLMTGADSVEEANKLITLIPHELQKVGFNLRKWISNNSKILTTVEDTGDNKVLNIIENECVKTLGLKWEPQKDLFKFSVNC…	1748	139
85	LELCAAHLLSELIQR	32	15	embryo.dev-embryo	6.315100000000001e-35	0	False	EBZ_32.1_sets_embryo.dev-embryo	105.0	60.0	74.0	4.0	74.0	1.0	1.0	32.1	intergenic;antisense;sense;exonic;intronic;fiveUTR;threeUTR;	TINVDQKKWKNFKLADPDFNKPGRIDLIIGADVYTHILQNGVIKIDGLLGQKTDFGWIVSGCKKSKGKETIVATTIEIKELDRYWEVEEEEKDDIESEICENKFIKTTKKDSDGRYIVSIPFKEDVTLGDSKKQAIARYMNLEKKLKRNEKLKVDYTKFMNEYMDLGHMIEVSDEGKYFLPHQAVIRDSSLTTKLRVVFDASAKTTNNKSLNDIMWVGPRVQKDIFDIIIKWRKWEFVVSADIEKMYRQIKIDNNDQKYQYILWRNSPKEKIKTYKLTTVTYGTASAPYLATRVLVDIADKCKNQVISAIIRNDFYMDDLMTGADSVEEANKLITLIPHELQKVGFNLRKWISNNSKILTTVEDTGDNKVLNIIENECVKTLGLKWEPQKDLFKFSVNC…	1748	139
86	LFMIQSR	32	7	embryo	0.058587	0	False	EBZ_32.1_sets_embryo.dev-embryo	105.0	60.0	74.0	4.0	74.0	1.0	1.0	32.1	intergenic;antisense;sense;exonic;intronic;fiveUTR;threeUTR;	TINVDQKKWKNFKLADPDFNKPGRIDLIIGADVYTHILQNGVIKIDGLLGQKTDFGWIVSGCKKSKGKETIVATTIEIKELDRYWEVEEEEKDDIESEICENKFIKTTKKDSDGRYIVSIPFKEDVTLGDSKKQAIARYMNLEKKLKRNEKLKVDYTKFMNEYMDLGHMIEVSDEGKYFLPHQAVIRDSSLTTKLRVVFDASAKTTNNKSLNDIMWVGPRVQKDIFDIIIKWRKWEFVVSADIEKMYRQIKIDNNDQKYQYILWRNSPKEKIKTYKLTTVTYGTASAPYLATRVLVDIADKCKNQVISAIIRNDFYMDDLMTGADSVEEANKLITLIPHELQKVGFNLRKWISNNSKILTTVEDTGDNKVLNIIENECVKTLGLKWEPQKDLFKFSVNC…	1748	139
87	LFMIQSRSRSK	32	11	embryo	1.032	0	False	EBZ_32.1_sets_embryo.dev-embryo	105.0	60.0	74.0	4.0	74.0	1.0	1.0	32.1	intergenic;antisense;sense;exonic;intronic;fiveUTR;threeUTR;	TINVDQKKWKNFKLADPDFNKPGRIDLIIGADVYTHILQNGVIKIDGLLGQKTDFGWIVSGCKKSKGKETIVATTIEIKELDRYWEVEEEEKDDIESEICENKFIKTTKKDSDGRYIVSIPFKEDVTLGDSKKQAIARYMNLEKKLKRNEKLKVDYTKFMNEYMDLGHMIEVSDEGKYFLPHQAVIRDSSLTTKLRVVFDASAKTTNNKSLNDIMWVGPRVQKDIFDIIIKWRKWEFVVSADIEKMYRQIKIDNNDQKYQYILWRNSPKEKIKTYKLTTVTYGTASAPYLATRVLVDIADKCKNQVISAIIRNDFYMDDLMTGADSVEEANKLITLIPHELQKVGFNLRKWISNNSKILTTVEDTGDNKVLNIIENECVKTLGLKWEPQKDLFKFSVNC…	1748	139
88	LHSFEEQCSLVLDNMQSQLSELEENNKLFMIQSR	32	34	embryo	0.14705	0	False	EBZ_32.1_sets_embryo.dev-embryo	105.0	60.0	74.0	4.0	74.0	1.0	1.0	32.1	intergenic;antisense;sense;exonic;intronic;fiveUTR;threeUTR;	TINVDQKKWKNFKLADPDFNKPGRIDLIIGADVYTHILQNGVIKIDGLLGQKTDFGWIVSGCKKSKGKETIVATTIEIKELDRYWEVEEEEKDDIESEICENKFIKTTKKDSDGRYIVSIPFKEDVTLGDSKKQAIARYMNLEKKLKRNEKLKVDYTKFMNEYMDLGHMIEVSDEGKYFLPHQAVIRDSSLTTKLRVVFDASAKTTNNKSLNDIMWVGPRVQKDIFDIIIKWRKWEFVVSADIEKMYRQIKIDNNDQKYQYILWRNSPKEKIKTYKLTTVTYGTASAPYLATRVLVDIADKCKNQVISAIIRNDFYMDDLMTGADSVEEANKLITLIPHELQKVGFNLRKWISNNSKILTTVEDTGDNKVLNIIENECVKTLGLKWEPQKDLFKFSVNC…	1748	139
89	LIPVPIR	32	7	embryo.dev-embryo	0.041987	0	False	EBZ_32.1_sets_embryo.dev-embryo	105.0	60.0	74.0	4.0	74.0	1.0	1.0	32.1	intergenic;antisense;sense;exonic;intronic;fiveUTR;threeUTR;	TINVDQKKWKNFKLADPDFNKPGRIDLIIGADVYTHILQNGVIKIDGLLGQKTDFGWIVSGCKKSKGKETIVATTIEIKELDRYWEVEEEEKDDIESEICENKFIKTTKKDSDGRYIVSIPFKEDVTLGDSKKQAIARYMNLEKKLKRNEKLKVDYTKFMNEYMDLGHMIEVSDEGKYFLPHQAVIRDSSLTTKLRVVFDASAKTTNNKSLNDIMWVGPRVQKDIFDIIIKWRKWEFVVSADIEKMYRQIKIDNNDQKYQYILWRNSPKEKIKTYKLTTVTYGTASAPYLATRVLVDIADKCKNQVISAIIRNDFYMDDLMTGADSVEEANKLITLIPHELQKVGFNLRKWISNNSKILTTVEDTGDNKVLNIIENECVKTLGLKWEPQKDLFKFSVNC…	1748	139
90	LIPVPIRNEDR	32	11	embryo.dev-embryo	0.0014454	0	False	EBZ_32.1_sets_embryo.dev-embryo	105.0	60.0	74.0	4.0	74.0	1.0	1.0	32.1	intergenic;antisense;sense;exonic;intronic;fiveUTR;threeUTR;	TINVDQKKWKNFKLADPDFNKPGRIDLIIGADVYTHILQNGVIKIDGLLGQKTDFGWIVSGCKKSKGKETIVATTIEIKELDRYWEVEEEEKDDIESEICENKFIKTTKKDSDGRYIVSIPFKEDVTLGDSKKQAIARYMNLEKKLKRNEKLKVDYTKFMNEYMDLGHMIEVSDEGKYFLPHQAVIRDSSLTTKLRVVFDASAKTTNNKSLNDIMWVGPRVQKDIFDIIIKWRKWEFVVSADIEKMYRQIKIDNNDQKYQYILWRNSPKEKIKTYKLTTVTYGTASAPYLATRVLVDIADKCKNQVISAIIRNDFYMDDLMTGADSVEEANKLITLIPHELQKVGFNLRKWISNNSKILTTVEDTGDNKVLNIIENECVKTLGLKWEPQKDLFKFSVNC…	1748	139
91	LIQKQTSVVDSTSNLLKR	32	18	embryo	0.38486	0	False	EBZ_32.1_sets_embryo.dev-embryo	105.0	60.0	74.0	4.0	74.0	1.0	1.0	32.1	intergenic;antisense;sense;exonic;intronic;fiveUTR;threeUTR;	TINVDQKKWKNFKLADPDFNKPGRIDLIIGADVYTHILQNGVIKIDGLLGQKTDFGWIVSGCKKSKGKETIVATTIEIKELDRYWEVEEEEKDDIESEICENKFIKTTKKDSDGRYIVSIPFKEDVTLGDSKKQAIARYMNLEKKLKRNEKLKVDYTKFMNEYMDLGHMIEVSDEGKYFLPHQAVIRDSSLTTKLRVVFDASAKTTNNKSLNDIMWVGPRVQKDIFDIIIKWRKWEFVVSADIEKMYRQIKIDNNDQKYQYILWRNSPKEKIKTYKLTTVTYGTASAPYLATRVLVDIADKCKNQVISAIIRNDFYMDDLMTGADSVEEANKLITLIPHELQKVGFNLRKWISNNSKILTTVEDTGDNKVLNIIENECVKTLGLKWEPQKDLFKFSVNC…	1748	139
92	LITLIPHELQK	32	11	embryo.dev-embryo	0.00026567	0	False	EBZ_32.1_sets_embryo.dev-embryo	105.0	60.0	74.0	4.0	74.0	1.0	1.0	32.1	intergenic;antisense;sense;exonic;intronic;fiveUTR;threeUTR;	TINVDQKKWKNFKLADPDFNKPGRIDLIIGADVYTHILQNGVIKIDGLLGQKTDFGWIVSGCKKSKGKETIVATTIEIKELDRYWEVEEEEKDDIESEICENKFIKTTKKDSDGRYIVSIPFKEDVTLGDSKKQAIARYMNLEKKLKRNEKLKVDYTKFMNEYMDLGHMIEVSDEGKYFLPHQAVIRDSSLTTKLRVVFDASAKTTNNKSLNDIMWVGPRVQKDIFDIIIKWRKWEFVVSADIEKMYRQIKIDNNDQKYQYILWRNSPKEKIKTYKLTTVTYGTASAPYLATRVLVDIADKCKNQVISAIIRNDFYMDDLMTGADSVEEANKLITLIPHELQKVGFNLRKWISNNSKILTTVEDTGDNKVLNIIENECVKTLGLKWEPQKDLFKFSVNC…	1748	139
93	LITLIPHELQKVGFNLRK	32	18	embryo	4.0727	0	False	EBZ_32.1_sets_embryo.dev-embryo	105.0	60.0	74.0	4.0	74.0	1.0	1.0	32.1	intergenic;antisense;sense;exonic;intronic;fiveUTR;threeUTR;	TINVDQKKWKNFKLADPDFNKPGRIDLIIGADVYTHILQNGVIKIDGLLGQKTDFGWIVSGCKKSKGKETIVATTIEIKELDRYWEVEEEEKDDIESEICENKFIKTTKKDSDGRYIVSIPFKEDVTLGDSKKQAIARYMNLEKKLKRNEKLKVDYTKFMNEYMDLGHMIEVSDEGKYFLPHQAVIRDSSLTTKLRVVFDASAKTTNNKSLNDIMWVGPRVQKDIFDIIIKWRKWEFVVSADIEKMYRQIKIDNNDQKYQYILWRNSPKEKIKTYKLTTVTYGTASAPYLATRVLVDIADKCKNQVISAIIRNDFYMDDLMTGADSVEEANKLITLIPHELQKVGFNLRKWISNNSKILTTVEDTGDNKVLNIIENECVKTLGLKWEPQKDLFKFSVNC…	1748	139
94	LKNTEWNHVK	32	10	embryo.dev-embryo	0.40517	0	False	EBZ_32.1_sets_embryo.dev-embryo	105.0	60.0	74.0	4.0	74.0	1.0	1.0	32.1	intergenic;antisense;sense;exonic;intronic;fiveUTR;threeUTR;	TINVDQKKWKNFKLADPDFNKPGRIDLIIGADVYTHILQNGVIKIDGLLGQKTDFGWIVSGCKKSKGKETIVATTIEIKELDRYWEVEEEEKDDIESEICENKFIKTTKKDSDGRYIVSIPFKEDVTLGDSKKQAIARYMNLEKKLKRNEKLKVDYTKFMNEYMDLGHMIEVSDEGKYFLPHQAVIRDSSLTTKLRVVFDASAKTTNNKSLNDIMWVGPRVQKDIFDIIIKWRKWEFVVSADIEKMYRQIKIDNNDQKYQYILWRNSPKEKIKTYKLTTVTYGTASAPYLATRVLVDIADKCKNQVISAIIRNDFYMDDLMTGADSVEEANKLITLIPHELQKVGFNLRKWISNNSKILTTVEDTGDNKVLNIIENECVKTLGLKWEPQKDLFKFSVNC…	1748	139
95	LNTNILRPNQLK	32	12	embryo.dev-embryo	8.483699999999999e-18	0	False	EBZ_32.1_sets_embryo.dev-embryo	105.0	60.0	74.0	4.0	74.0	1.0	1.0	32.1	intergenic;antisense;sense;exonic;intronic;fiveUTR;threeUTR;	TINVDQKKWKNFKLADPDFNKPGRIDLIIGADVYTHILQNGVIKIDGLLGQKTDFGWIVSGCKKSKGKETIVATTIEIKELDRYWEVEEEEKDDIESEICENKFIKTTKKDSDGRYIVSIPFKEDVTLGDSKKQAIARYMNLEKKLKRNEKLKVDYTKFMNEYMDLGHMIEVSDEGKYFLPHQAVIRDSSLTTKLRVVFDASAKTTNNKSLNDIMWVGPRVQKDIFDIIIKWRKWEFVVSADIEKMYRQIKIDNNDQKYQYILWRNSPKEKIKTYKLTTVTYGTASAPYLATRVLVDIADKCKNQVISAIIRNDFYMDDLMTGADSVEEANKLITLIPHELQKVGFNLRKWISNNSKILTTVEDTGDNKVLNIIENECVKTLGLKWEPQKDLFKFSVNC…	1748	139
96	LNTNILRPNQLKK	32	13	embryo.dev-embryo	0.012085	0	False	EBZ_32.1_sets_embryo.dev-embryo	105.0	60.0	74.0	4.0	74.0	1.0	1.0	32.1	intergenic;antisense;sense;exonic;intronic;fiveUTR;threeUTR;	TINVDQKKWKNFKLADPDFNKPGRIDLIIGADVYTHILQNGVIKIDGLLGQKTDFGWIVSGCKKSKGKETIVATTIEIKELDRYWEVEEEEKDDIESEICENKFIKTTKKDSDGRYIVSIPFKEDVTLGDSKKQAIARYMNLEKKLKRNEKLKVDYTKFMNEYMDLGHMIEVSDEGKYFLPHQAVIRDSSLTTKLRVVFDASAKTTNNKSLNDIMWVGPRVQKDIFDIIIKWRKWEFVVSADIEKMYRQIKIDNNDQKYQYILWRNSPKEKIKTYKLTTVTYGTASAPYLATRVLVDIADKCKNQVISAIIRNDFYMDDLMTGADSVEEANKLITLIPHELQKVGFNLRKWISNNSKILTTVEDTGDNKVLNIIENECVKTLGLKWEPQKDLFKFSVNC…	1748	139
97	LQCTGSQIELFDLPQQGVLSIAPYCTAR	32	28	embryo	0.00010241	0	False	EBZ_32.1_sets_embryo.dev-embryo	105.0	60.0	74.0	4.0	74.0	1.0	1.0	32.1	intergenic;antisense;sense;exonic;intronic;fiveUTR;threeUTR;	TINVDQKKWKNFKLADPDFNKPGRIDLIIGADVYTHILQNGVIKIDGLLGQKTDFGWIVSGCKKSKGKETIVATTIEIKELDRYWEVEEEEKDDIESEICENKFIKTTKKDSDGRYIVSIPFKEDVTLGDSKKQAIARYMNLEKKLKRNEKLKVDYTKFMNEYMDLGHMIEVSDEGKYFLPHQAVIRDSSLTTKLRVVFDASAKTTNNKSLNDIMWVGPRVQKDIFDIIIKWRKWEFVVSADIEKMYRQIKIDNNDQKYQYILWRNSPKEKIKTYKLTTVTYGTASAPYLATRVLVDIADKCKNQVISAIIRNDFYMDDLMTGADSVEEANKLITLIPHELQKVGFNLRKWISNNSKILTTVEDTGDNKVLNIIENECVKTLGLKWEPQKDLFKFSVNC…	1748	139
98	LQNSNAEFNVK	32	11	embryo.dev-embryo	0.00021818	0	False	EBZ_32.1_sets_embryo.dev-embryo	105.0	60.0	74.0	4.0	74.0	1.0	1.0	32.1	intergenic;antisense;sense;exonic;intronic;fiveUTR;threeUTR;	TINVDQKKWKNFKLADPDFNKPGRIDLIIGADVYTHILQNGVIKIDGLLGQKTDFGWIVSGCKKSKGKETIVATTIEIKELDRYWEVEEEEKDDIESEICENKFIKTTKKDSDGRYIVSIPFKEDVTLGDSKKQAIARYMNLEKKLKRNEKLKVDYTKFMNEYMDLGHMIEVSDEGKYFLPHQAVIRDSSLTTKLRVVFDASAKTTNNKSLNDIMWVGPRVQKDIFDIIIKWRKWEFVVSADIEKMYRQIKIDNNDQKYQYILWRNSPKEKIKTYKLTTVTYGTASAPYLATRVLVDIADKCKNQVISAIIRNDFYMDDLMTGADSVEEANKLITLIPHELQKVGFNLRKWISNNSKILTTVEDTGDNKVLNIIENECVKTLGLKWEPQKDLFKFSVNC…	1748	139
99	LSILNHTEEFER	32	12	embryo	0.42404	0	False	EBZ_32.1_sets_embryo.dev-embryo	105.0	60.0	74.0	4.0	74.0	1.0	1.0	32.1	intergenic;antisense;sense;exonic;intronic;fiveUTR;threeUTR;	TINVDQKKWKNFKLADPDFNKPGRIDLIIGADVYTHILQNGVIKIDGLLGQKTDFGWIVSGCKKSKGKETIVATTIEIKELDRYWEVEEEEKDDIESEICENKFIKTTKKDSDGRYIVSIPFKEDVTLGDSKKQAIARYMNLEKKLKRNEKLKVDYTKFMNEYMDLGHMIEVSDEGKYFLPHQAVIRDSSLTTKLRVVFDASAKTTNNKSLNDIMWVGPRVQKDIFDIIIKWRKWEFVVSADIEKMYRQIKIDNNDQKYQYILWRNSPKEKIKTYKLTTVTYGTASAPYLATRVLVDIADKCKNQVISAIIRNDFYMDDLMTGADSVEEANKLITLIPHELQKVGFNLRKWISNNSKILTTVEDTGDNKVLNIIENECVKTLGLKWEPQKDLFKFSVNC…	1748	139
100	LTTVTYGTASAPYLATR	32	17	embryo	0.00034551	0	False	EBZ_32.1_sets_embryo.dev-embryo	105.0	60.0	74.0	4.0	74.0	1.0	1.0	32.1	intergenic;antisense;sense;exonic;intronic;fiveUTR;threeUTR;	TINVDQKKWKNFKLADPDFNKPGRIDLIIGADVYTHILQNGVIKIDGLLGQKTDFGWIVSGCKKSKGKETIVATTIEIKELDRYWEVEEEEKDDIESEICENKFIKTTKKDSDGRYIVSIPFKEDVTLGDSKKQAIARYMNLEKKLKRNEKLKVDYTKFMNEYMDLGHMIEVSDEGKYFLPHQAVIRDSSLTTKLRVVFDASAKTTNNKSLNDIMWVGPRVQKDIFDIIIKWRKWEFVVSADIEKMYRQIKIDNNDQKYQYILWRNSPKEKIKTYKLTTVTYGTASAPYLATRVLVDIADKCKNQVISAIIRNDFYMDDLMTGADSVEEANKLITLIPHELQKVGFNLRKWISNNSKILTTVEDTGDNKVLNIIENECVKTLGLKWEPQKDLFKFSVNC…	1748	139
101	MQAITFAGPLPVL	32	13	embryo.dev-embryo	9.1377e-06	0	False	EBZ_32.1_sets_embryo.dev-embryo	105.0	60.0	74.0	4.0	74.0	1.0	1.0	32.1	intergenic;antisense;sense;exonic;intronic;fiveUTR;threeUTR;	TINVDQKKWKNFKLADPDFNKPGRIDLIIGADVYTHILQNGVIKIDGLLGQKTDFGWIVSGCKKSKGKETIVATTIEIKELDRYWEVEEEEKDDIESEICENKFIKTTKKDSDGRYIVSIPFKEDVTLGDSKKQAIARYMNLEKKLKRNEKLKVDYTKFMNEYMDLGHMIEVSDEGKYFLPHQAVIRDSSLTTKLRVVFDASAKTTNNKSLNDIMWVGPRVQKDIFDIIIKWRKWEFVVSADIEKMYRQIKIDNNDQKYQYILWRNSPKEKIKTYKLTTVTYGTASAPYLATRVLVDIADKCKNQVISAIIRNDFYMDDLMTGADSVEEANKLITLIPHELQKVGFNLRKWISNNSKILTTVEDTGDNKVLNIIENECVKTLGLKWEPQKDLFKFSVNC…	1748	139
102	MQEGYITRPITK	32	12	embryo	2.5844e-06	0	False	EBZ_32.1_sets_embryo.dev-embryo	105.0	60.0	74.0	4.0	74.0	1.0	1.0	32.1	intergenic;antisense;sense;exonic;intronic;fiveUTR;threeUTR;	TINVDQKKWKNFKLADPDFNKPGRIDLIIGADVYTHILQNGVIKIDGLLGQKTDFGWIVSGCKKSKGKETIVATTIEIKELDRYWEVEEEEKDDIESEICENKFIKTTKKDSDGRYIVSIPFKEDVTLGDSKKQAIARYMNLEKKLKRNEKLKVDYTKFMNEYMDLGHMIEVSDEGKYFLPHQAVIRDSSLTTKLRVVFDASAKTTNNKSLNDIMWVGPRVQKDIFDIIIKWRKWEFVVSADIEKMYRQIKIDNNDQKYQYILWRNSPKEKIKTYKLTTVTYGTASAPYLATRVLVDIADKCKNQVISAIIRNDFYMDDLMTGADSVEEANKLITLIPHELQKVGFNLRKWISNNSKILTTVEDTGDNKVLNIIENECVKTLGLKWEPQKDLFKFSVNC…	1748	139
103	NFKLADPDFNK	32	11	embryo	9.9639	0	False	EBZ_32.1_sets_embryo.dev-embryo	105.0	60.0	74.0	4.0	74.0	1.0	1.0	32.1	intergenic;antisense;sense;exonic;intronic;fiveUTR;threeUTR;	TINVDQKKWKNFKLADPDFNKPGRIDLIIGADVYTHILQNGVIKIDGLLGQKTDFGWIVSGCKKSKGKETIVATTIEIKELDRYWEVEEEEKDDIESEICENKFIKTTKKDSDGRYIVSIPFKEDVTLGDSKKQAIARYMNLEKKLKRNEKLKVDYTKFMNEYMDLGHMIEVSDEGKYFLPHQAVIRDSSLTTKLRVVFDASAKTTNNKSLNDIMWVGPRVQKDIFDIIIKWRKWEFVVSADIEKMYRQIKIDNNDQKYQYILWRNSPKEKIKTYKLTTVTYGTASAPYLATRVLVDIADKCKNQVISAIIRNDFYMDDLMTGADSVEEANKLITLIPHELQKVGFNLRKWISNNSKILTTVEDTGDNKVLNIIENECVKTLGLKWEPQKDLFKFSVNC…	1748	139
104	NLLDNQNNLDK	32	11	embryo.dev-embryo	1.5949000000000004e-06	0	False	EBZ_32.1_sets_embryo.dev-embryo	105.0	60.0	74.0	4.0	74.0	1.0	1.0	32.1	intergenic;antisense;sense;exonic;intronic;fiveUTR;threeUTR;	TINVDQKKWKNFKLADPDFNKPGRIDLIIGADVYTHILQNGVIKIDGLLGQKTDFGWIVSGCKKSKGKETIVATTIEIKELDRYWEVEEEEKDDIESEICENKFIKTTKKDSDGRYIVSIPFKEDVTLGDSKKQAIARYMNLEKKLKRNEKLKVDYTKFMNEYMDLGHMIEVSDEGKYFLPHQAVIRDSSLTTKLRVVFDASAKTTNNKSLNDIMWVGPRVQKDIFDIIIKWRKWEFVVSADIEKMYRQIKIDNNDQKYQYILWRNSPKEKIKTYKLTTVTYGTASAPYLATRVLVDIADKCKNQVISAIIRNDFYMDDLMTGADSVEEANKLITLIPHELQKVGFNLRKWISNNSKILTTVEDTGDNKVLNIIENECVKTLGLKWEPQKDLFKFSVNC…	1748	139
105	NLLDNQNNLDKLIQK	32	15	embryo.dev-embryo	6.407300000000001e-05	0	False	EBZ_32.1_sets_embryo.dev-embryo	105.0	60.0	74.0	4.0	74.0	1.0	1.0	32.1	intergenic;antisense;sense;exonic;intronic;fiveUTR;threeUTR;	TINVDQKKWKNFKLADPDFNKPGRIDLIIGADVYTHILQNGVIKIDGLLGQKTDFGWIVSGCKKSKGKETIVATTIEIKELDRYWEVEEEEKDDIESEICENKFIKTTKKDSDGRYIVSIPFKEDVTLGDSKKQAIARYMNLEKKLKRNEKLKVDYTKFMNEYMDLGHMIEVSDEGKYFLPHQAVIRDSSLTTKLRVVFDASAKTTNNKSLNDIMWVGPRVQKDIFDIIIKWRKWEFVVSADIEKMYRQIKIDNNDQKYQYILWRNSPKEKIKTYKLTTVTYGTASAPYLATRVLVDIADKCKNQVISAIIRNDFYMDDLMTGADSVEEANKLITLIPHELQKVGFNLRKWISNNSKILTTVEDTGDNKVLNIIENECVKTLGLKWEPQKDLFKFSVNC…	1748	139
106	NQVISAIIR	32	9	embryo.dev-embryo	0.0034422	0	False	EBZ_32.1_sets_embryo.dev-embryo	105.0	60.0	74.0	4.0	74.0	1.0	1.0	32.1	intergenic;antisense;sense;exonic;intronic;fiveUTR;threeUTR;	TINVDQKKWKNFKLADPDFNKPGRIDLIIGADVYTHILQNGVIKIDGLLGQKTDFGWIVSGCKKSKGKETIVATTIEIKELDRYWEVEEEEKDDIESEICENKFIKTTKKDSDGRYIVSIPFKEDVTLGDSKKQAIARYMNLEKKLKRNEKLKVDYTKFMNEYMDLGHMIEVSDEGKYFLPHQAVIRDSSLTTKLRVVFDASAKTTNNKSLNDIMWVGPRVQKDIFDIIIKWRKWEFVVSADIEKMYRQIKIDNNDQKYQYILWRNSPKEKIKTYKLTTVTYGTASAPYLATRVLVDIADKCKNQVISAIIRNDFYMDDLMTGADSVEEANKLITLIPHELQKVGFNLRKWISNNSKILTTVEDTGDNKVLNIIENECVKTLGLKWEPQKDLFKFSVNC…	1748	139
107	NTEWNHVK	32	8	embryo	0.017749	0	False	EBZ_32.1_sets_embryo.dev-embryo	105.0	60.0	74.0	4.0	74.0	1.0	1.0	32.1	intergenic;antisense;sense;exonic;intronic;fiveUTR;threeUTR;	TINVDQKKWKNFKLADPDFNKPGRIDLIIGADVYTHILQNGVIKIDGLLGQKTDFGWIVSGCKKSKGKETIVATTIEIKELDRYWEVEEEEKDDIESEICENKFIKTTKKDSDGRYIVSIPFKEDVTLGDSKKQAIARYMNLEKKLKRNEKLKVDYTKFMNEYMDLGHMIEVSDEGKYFLPHQAVIRDSSLTTKLRVVFDASAKTTNNKSLNDIMWVGPRVQKDIFDIIIKWRKWEFVVSADIEKMYRQIKIDNNDQKYQYILWRNSPKEKIKTYKLTTVTYGTASAPYLATRVLVDIADKCKNQVISAIIRNDFYMDDLMTGADSVEEANKLITLIPHELQKVGFNLRKWISNNSKILTTVEDTGDNKVLNIIENECVKTLGLKWEPQKDLFKFSVNC…	1748	139
108	NTEWNHVKSEDNPADLASRGVDSNQLINCDFWWK	32	34	embryo	0.41235	0	False	EBZ_32.1_sets_embryo.dev-embryo	105.0	60.0	74.0	4.0	74.0	1.0	1.0	32.1	intergenic;antisense;sense;exonic;intronic;fiveUTR;threeUTR;	TINVDQKKWKNFKLADPDFNKPGRIDLIIGADVYTHILQNGVIKIDGLLGQKTDFGWIVSGCKKSKGKETIVATTIEIKELDRYWEVEEEEKDDIESEICENKFIKTTKKDSDGRYIVSIPFKEDVTLGDSKKQAIARYMNLEKKLKRNEKLKVDYTKFMNEYMDLGHMIEVSDEGKYFLPHQAVIRDSSLTTKLRVVFDASAKTTNNKSLNDIMWVGPRVQKDIFDIIIKWRKWEFVVSADIEKMYRQIKIDNNDQKYQYILWRNSPKEKIKTYKLTTVTYGTASAPYLATRVLVDIADKCKNQVISAIIRNDFYMDDLMTGADSVEEANKLITLIPHELQKVGFNLRKWISNNSKILTTVEDTGDNKVLNIIENECVKTLGLKWEPQKDLFKFSVNC…	1748	139
109	PITKICPLEGIKSVDK	32	16	embryo	0.36835	0	False	EBZ_32.1_sets_embryo.dev-embryo	105.0	60.0	74.0	4.0	74.0	1.0	1.0	32.1	intergenic;antisense;sense;exonic;intronic;fiveUTR;threeUTR;	TINVDQKKWKNFKLADPDFNKPGRIDLIIGADVYTHILQNGVIKIDGLLGQKTDFGWIVSGCKKSKGKETIVATTIEIKELDRYWEVEEEEKDDIESEICENKFIKTTKKDSDGRYIVSIPFKEDVTLGDSKKQAIARYMNLEKKLKRNEKLKVDYTKFMNEYMDLGHMIEVSDEGKYFLPHQAVIRDSSLTTKLRVVFDASAKTTNNKSLNDIMWVGPRVQKDIFDIIIKWRKWEFVVSADIEKMYRQIKIDNNDQKYQYILWRNSPKEKIKTYKLTTVTYGTASAPYLATRVLVDIADKCKNQVISAIIRNDFYMDDLMTGADSVEEANKLITLIPHELQKVGFNLRKWISNNSKILTTVEDTGDNKVLNIIENECVKTLGLKWEPQKDLFKFSVNC…	1748	139
110	PLYTIVSEK	32	9	embryo	0.36972	0	False	EBZ_32.1_sets_embryo.dev-embryo	105.0	60.0	74.0	4.0	74.0	1.0	1.0	32.1	intergenic;antisense;sense;exonic;intronic;fiveUTR;threeUTR;	TINVDQKKWKNFKLADPDFNKPGRIDLIIGADVYTHILQNGVIKIDGLLGQKTDFGWIVSGCKKSKGKETIVATTIEIKELDRYWEVEEEEKDDIESEICENKFIKTTKKDSDGRYIVSIPFKEDVTLGDSKKQAIARYMNLEKKLKRNEKLKVDYTKFMNEYMDLGHMIEVSDEGKYFLPHQAVIRDSSLTTKLRVVFDASAKTTNNKSLNDIMWVGPRVQKDIFDIIIKWRKWEFVVSADIEKMYRQIKIDNNDQKYQYILWRNSPKEKIKTYKLTTVTYGTASAPYLATRVLVDIADKCKNQVISAIIRNDFYMDDLMTGADSVEEANKLITLIPHELQKVGFNLRKWISNNSKILTTVEDTGDNKVLNIIENECVKTLGLKWEPQKDLFKFSVNC…	1748	139
111	PLYTIVSEKDQQEVLTPGHFLIGR	32	24	embryo	0.14123	0	False	EBZ_32.1_sets_embryo.dev-embryo	105.0	60.0	74.0	4.0	74.0	1.0	1.0	32.1	intergenic;antisense;sense;exonic;intronic;fiveUTR;threeUTR;	TINVDQKKWKNFKLADPDFNKPGRIDLIIGADVYTHILQNGVIKIDGLLGQKTDFGWIVSGCKKSKGKETIVATTIEIKELDRYWEVEEEEKDDIESEICENKFIKTTKKDSDGRYIVSIPFKEDVTLGDSKKQAIARYMNLEKKLKRNEKLKVDYTKFMNEYMDLGHMIEVSDEGKYFLPHQAVIRDSSLTTKLRVVFDASAKTTNNKSLNDIMWVGPRVQKDIFDIIIKWRKWEFVVSADIEKMYRQIKIDNNDQKYQYILWRNSPKEKIKTYKLTTVTYGTASAPYLATRVLVDIADKCKNQVISAIIRNDFYMDDLMTGADSVEEANKLITLIPHELQKVGFNLRKWISNNSKILTTVEDTGDNKVLNIIENECVKTLGLKWEPQKDLFKFSVNC…	1748	139
112	QLHSLIEEGEK	32	11	embryo	0.35038	0	False	EBZ_32.1_sets_embryo.dev-embryo	105.0	60.0	74.0	4.0	74.0	1.0	1.0	32.1	intergenic;antisense;sense;exonic;intronic;fiveUTR;threeUTR;	TINVDQKKWKNFKLADPDFNKPGRIDLIIGADVYTHILQNGVIKIDGLLGQKTDFGWIVSGCKKSKGKETIVATTIEIKELDRYWEVEEEEKDDIESEICENKFIKTTKKDSDGRYIVSIPFKEDVTLGDSKKQAIARYMNLEKKLKRNEKLKVDYTKFMNEYMDLGHMIEVSDEGKYFLPHQAVIRDSSLTTKLRVVFDASAKTTNNKSLNDIMWVGPRVQKDIFDIIIKWRKWEFVVSADIEKMYRQIKIDNNDQKYQYILWRNSPKEKIKTYKLTTVTYGTASAPYLATRVLVDIADKCKNQVISAIIRNDFYMDDLMTGADSVEEANKLITLIPHELQKVGFNLRKWISNNSKILTTVEDTGDNKVLNIIENECVKTLGLKWEPQKDLFKFSVNC…	1748	139
113	QNTAQQIMGNLPK	32	13	embryo	0.12316	0	False	EBZ_32.1_sets_embryo.dev-embryo	105.0	60.0	74.0	4.0	74.0	1.0	1.0	32.1	intergenic;antisense;sense;exonic;intronic;fiveUTR;threeUTR;	TINVDQKKWKNFKLADPDFNKPGRIDLIIGADVYTHILQNGVIKIDGLLGQKTDFGWIVSGCKKSKGKETIVATTIEIKELDRYWEVEEEEKDDIESEICENKFIKTTKKDSDGRYIVSIPFKEDVTLGDSKKQAIARYMNLEKKLKRNEKLKVDYTKFMNEYMDLGHMIEVSDEGKYFLPHQAVIRDSSLTTKLRVVFDASAKTTNNKSLNDIMWVGPRVQKDIFDIIIKWRKWEFVVSADIEKMYRQIKIDNNDQKYQYILWRNSPKEKIKTYKLTTVTYGTASAPYLATRVLVDIADKCKNQVISAIIRNDFYMDDLMTGADSVEEANKLITLIPHELQKVGFNLRKWISNNSKILTTVEDTGDNKVLNIIENECVKTLGLKWEPQKDLFKFSVNC…	1748	139
114	QQSVEEPVLINTVLNDKIDDPIYELIER	32	28	embryo	6.1124e-42	0	False	EBZ_32.1_sets_embryo.dev-embryo	105.0	60.0	74.0	4.0	74.0	1.0	1.0	32.1	intergenic;antisense;sense;exonic;intronic;fiveUTR;threeUTR;	TINVDQKKWKNFKLADPDFNKPGRIDLIIGADVYTHILQNGVIKIDGLLGQKTDFGWIVSGCKKSKGKETIVATTIEIKELDRYWEVEEEEKDDIESEICENKFIKTTKKDSDGRYIVSIPFKEDVTLGDSKKQAIARYMNLEKKLKRNEKLKVDYTKFMNEYMDLGHMIEVSDEGKYFLPHQAVIRDSSLTTKLRVVFDASAKTTNNKSLNDIMWVGPRVQKDIFDIIIKWRKWEFVVSADIEKMYRQIKIDNNDQKYQYILWRNSPKEKIKTYKLTTVTYGTASAPYLATRVLVDIADKCKNQVISAIIRNDFYMDDLMTGADSVEEANKLITLIPHELQKVGFNLRKWISNNSKILTTVEDTGDNKVLNIIENECVKTLGLKWEPQKDLFKFSVNC…	1748	139
115	QTSVVDSTSNLLK	32	13	embryo.dev-embryo	6.586600000000001e-05	0	False	EBZ_32.1_sets_embryo.dev-embryo	105.0	60.0	74.0	4.0	74.0	1.0	1.0	32.1	intergenic;antisense;sense;exonic;intronic;fiveUTR;threeUTR;	TINVDQKKWKNFKLADPDFNKPGRIDLIIGADVYTHILQNGVIKIDGLLGQKTDFGWIVSGCKKSKGKETIVATTIEIKELDRYWEVEEEEKDDIESEICENKFIKTTKKDSDGRYIVSIPFKEDVTLGDSKKQAIARYMNLEKKLKRNEKLKVDYTKFMNEYMDLGHMIEVSDEGKYFLPHQAVIRDSSLTTKLRVVFDASAKTTNNKSLNDIMWVGPRVQKDIFDIIIKWRKWEFVVSADIEKMYRQIKIDNNDQKYQYILWRNSPKEKIKTYKLTTVTYGTASAPYLATRVLVDIADKCKNQVISAIIRNDFYMDDLMTGADSVEEANKLITLIPHELQKVGFNLRKWISNNSKILTTVEDTGDNKVLNIIENECVKTLGLKWEPQKDLFKFSVNC…	1748	139
116	QTSVVDSTSNLLKR	32	14	embryo.dev-embryo	5.0903e-09	0	False	EBZ_32.1_sets_embryo.dev-embryo	105.0	60.0	74.0	4.0	74.0	1.0	1.0	32.1	intergenic;antisense;sense;exonic;intronic;fiveUTR;threeUTR;	TINVDQKKWKNFKLADPDFNKPGRIDLIIGADVYTHILQNGVIKIDGLLGQKTDFGWIVSGCKKSKGKETIVATTIEIKELDRYWEVEEEEKDDIESEICENKFIKTTKKDSDGRYIVSIPFKEDVTLGDSKKQAIARYMNLEKKLKRNEKLKVDYTKFMNEYMDLGHMIEVSDEGKYFLPHQAVIRDSSLTTKLRVVFDASAKTTNNKSLNDIMWVGPRVQKDIFDIIIKWRKWEFVVSADIEKMYRQIKIDNNDQKYQYILWRNSPKEKIKTYKLTTVTYGTASAPYLATRVLVDIADKCKNQVISAIIRNDFYMDDLMTGADSVEEANKLITLIPHELQKVGFNLRKWISNNSKILTTVEDTGDNKVLNIIENECVKTLGLKWEPQKDLFKFSVNC…	1748	139
117	QTSVVDSTSNLLKRTTEDVNSNFR	32	24	embryo	0.15924000000000002	0	False	EBZ_32.1_sets_embryo.dev-embryo	105.0	60.0	74.0	4.0	74.0	1.0	1.0	32.1	intergenic;antisense;sense;exonic;intronic;fiveUTR;threeUTR;	TINVDQKKWKNFKLADPDFNKPGRIDLIIGADVYTHILQNGVIKIDGLLGQKTDFGWIVSGCKKSKGKETIVATTIEIKELDRYWEVEEEEKDDIESEICENKFIKTTKKDSDGRYIVSIPFKEDVTLGDSKKQAIARYMNLEKKLKRNEKLKVDYTKFMNEYMDLGHMIEVSDEGKYFLPHQAVIRDSSLTTKLRVVFDASAKTTNNKSLNDIMWVGPRVQKDIFDIIIKWRKWEFVVSADIEKMYRQIKIDNNDQKYQYILWRNSPKEKIKTYKLTTVTYGTASAPYLATRVLVDIADKCKNQVISAIIRNDFYMDDLMTGADSVEEANKLITLIPHELQKVGFNLRKWISNNSKILTTVEDTGDNKVLNIIENECVKTLGLKWEPQKDLFKFSVNC…	1748	139
118	RAPFEFMGSLYHILFGIMDEDDR	32	23	embryo	0.1519	0	False	EBZ_32.1_sets_embryo.dev-embryo	105.0	60.0	74.0	4.0	74.0	1.0	1.0	32.1	intergenic;antisense;sense;exonic;intronic;fiveUTR;threeUTR;	TINVDQKKWKNFKLADPDFNKPGRIDLIIGADVYTHILQNGVIKIDGLLGQKTDFGWIVSGCKKSKGKETIVATTIEIKELDRYWEVEEEEKDDIESEICENKFIKTTKKDSDGRYIVSIPFKEDVTLGDSKKQAIARYMNLEKKLKRNEKLKVDYTKFMNEYMDLGHMIEVSDEGKYFLPHQAVIRDSSLTTKLRVVFDASAKTTNNKSLNDIMWVGPRVQKDIFDIIIKWRKWEFVVSADIEKMYRQIKIDNNDQKYQYILWRNSPKEKIKTYKLTTVTYGTASAPYLATRVLVDIADKCKNQVISAIIRNDFYMDDLMTGADSVEEANKLITLIPHELQKVGFNLRKWISNNSKILTTVEDTGDNKVLNIIENECVKTLGLKWEPQKDLFKFSVNC…	1748	139
119	RSGTELK	32	7	embryo	0.45665	0	False	EBZ_32.1_sets_embryo.dev-embryo	105.0	60.0	74.0	4.0	74.0	1.0	1.0	32.1	intergenic;antisense;sense;exonic;intronic;fiveUTR;threeUTR;	TINVDQKKWKNFKLADPDFNKPGRIDLIIGADVYTHILQNGVIKIDGLLGQKTDFGWIVSGCKKSKGKETIVATTIEIKELDRYWEVEEEEKDDIESEICENKFIKTTKKDSDGRYIVSIPFKEDVTLGDSKKQAIARYMNLEKKLKRNEKLKVDYTKFMNEYMDLGHMIEVSDEGKYFLPHQAVIRDSSLTTKLRVVFDASAKTTNNKSLNDIMWVGPRVQKDIFDIIIKWRKWEFVVSADIEKMYRQIKIDNNDQKYQYILWRNSPKEKIKTYKLTTVTYGTASAPYLATRVLVDIADKCKNQVISAIIRNDFYMDDLMTGADSVEEANKLITLIPHELQKVGFNLRKWISNNSKILTTVEDTGDNKVLNIIENECVKTLGLKWEPQKDLFKFSVNC…	1748	139
120	SEDNPADLASR	32	11	embryo.dev-embryo	0.00046076	0	False	EBZ_32.1_sets_embryo.dev-embryo	105.0	60.0	74.0	4.0	74.0	1.0	1.0	32.1	intergenic;antisense;sense;exonic;intronic;fiveUTR;threeUTR;	TINVDQKKWKNFKLADPDFNKPGRIDLIIGADVYTHILQNGVIKIDGLLGQKTDFGWIVSGCKKSKGKETIVATTIEIKELDRYWEVEEEEKDDIESEICENKFIKTTKKDSDGRYIVSIPFKEDVTLGDSKKQAIARYMNLEKKLKRNEKLKVDYTKFMNEYMDLGHMIEVSDEGKYFLPHQAVIRDSSLTTKLRVVFDASAKTTNNKSLNDIMWVGPRVQKDIFDIIIKWRKWEFVVSADIEKMYRQIKIDNNDQKYQYILWRNSPKEKIKTYKLTTVTYGTASAPYLATRVLVDIADKCKNQVISAIIRNDFYMDDLMTGADSVEEANKLITLIPHELQKVGFNLRKWISNNSKILTTVEDTGDNKVLNIIENECVKTLGLKWEPQKDLFKFSVNC…	1748	139
121	SEWDQELSIEDK	32	12	embryo	0.39705	0	False	EBZ_32.1_sets_embryo.dev-embryo	105.0	60.0	74.0	4.0	74.0	1.0	1.0	32.1	intergenic;antisense;sense;exonic;intronic;fiveUTR;threeUTR;	TINVDQKKWKNFKLADPDFNKPGRIDLIIGADVYTHILQNGVIKIDGLLGQKTDFGWIVSGCKKSKGKETIVATTIEIKELDRYWEVEEEEKDDIESEICENKFIKTTKKDSDGRYIVSIPFKEDVTLGDSKKQAIARYMNLEKKLKRNEKLKVDYTKFMNEYMDLGHMIEVSDEGKYFLPHQAVIRDSSLTTKLRVVFDASAKTTNNKSLNDIMWVGPRVQKDIFDIIIKWRKWEFVVSADIEKMYRQIKIDNNDQKYQYILWRNSPKEKIKTYKLTTVTYGTASAPYLATRVLVDIADKCKNQVISAIIRNDFYMDDLMTGADSVEEANKLITLIPHELQKVGFNLRKWISNNSKILTTVEDTGDNKVLNIIENECVKTLGLKWEPQKDLFKFSVNC…	1748	139
122	SEWDQELSIEDKNYWEK	32	17	embryo	0.11193	0	False	EBZ_32.1_sets_embryo.dev-embryo	105.0	60.0	74.0	4.0	74.0	1.0	1.0	32.1	intergenic;antisense;sense;exonic;intronic;fiveUTR;threeUTR;	TINVDQKKWKNFKLADPDFNKPGRIDLIIGADVYTHILQNGVIKIDGLLGQKTDFGWIVSGCKKSKGKETIVATTIEIKELDRYWEVEEEEKDDIESEICENKFIKTTKKDSDGRYIVSIPFKEDVTLGDSKKQAIARYMNLEKKLKRNEKLKVDYTKFMNEYMDLGHMIEVSDEGKYFLPHQAVIRDSSLTTKLRVVFDASAKTTNNKSLNDIMWVGPRVQKDIFDIIIKWRKWEFVVSADIEKMYRQIKIDNNDQKYQYILWRNSPKEKIKTYKLTTVTYGTASAPYLATRVLVDIADKCKNQVISAIIRNDFYMDDLMTGADSVEEANKLITLIPHELQKVGFNLRKWISNNSKILTTVEDTGDNKVLNIIENECVKTLGLKWEPQKDLFKFSVNC…	1748	139
123	SEWDQELSIEDKNYWEKYK	32	19	embryo	0.21802	0	False	EBZ_32.1_sets_embryo.dev-embryo	105.0	60.0	74.0	4.0	74.0	1.0	1.0	32.1	intergenic;antisense;sense;exonic;intronic;fiveUTR;threeUTR;	TINVDQKKWKNFKLADPDFNKPGRIDLIIGADVYTHILQNGVIKIDGLLGQKTDFGWIVSGCKKSKGKETIVATTIEIKELDRYWEVEEEEKDDIESEICENKFIKTTKKDSDGRYIVSIPFKEDVTLGDSKKQAIARYMNLEKKLKRNEKLKVDYTKFMNEYMDLGHMIEVSDEGKYFLPHQAVIRDSSLTTKLRVVFDASAKTTNNKSLNDIMWVGPRVQKDIFDIIIKWRKWEFVVSADIEKMYRQIKIDNNDQKYQYILWRNSPKEKIKTYKLTTVTYGTASAPYLATRVLVDIADKCKNQVISAIIRNDFYMDDLMTGADSVEEANKLITLIPHELQKVGFNLRKWISNNSKILTTVEDTGDNKVLNIIENECVKTLGLKWEPQKDLFKFSVNC…	1748	139
124	SGTELKEVYTLLTAR	32	15	embryo.dev-embryo	1.197e-12	0	False	EBZ_32.1_sets_embryo.dev-embryo	105.0	60.0	74.0	4.0	74.0	1.0	1.0	32.1	intergenic;antisense;sense;exonic;intronic;fiveUTR;threeUTR;	TINVDQKKWKNFKLADPDFNKPGRIDLIIGADVYTHILQNGVIKIDGLLGQKTDFGWIVSGCKKSKGKETIVATTIEIKELDRYWEVEEEEKDDIESEICENKFIKTTKKDSDGRYIVSIPFKEDVTLGDSKKQAIARYMNLEKKLKRNEKLKVDYTKFMNEYMDLGHMIEVSDEGKYFLPHQAVIRDSSLTTKLRVVFDASAKTTNNKSLNDIMWVGPRVQKDIFDIIIKWRKWEFVVSADIEKMYRQIKIDNNDQKYQYILWRNSPKEKIKTYKLTTVTYGTASAPYLATRVLVDIADKCKNQVISAIIRNDFYMDDLMTGADSVEEANKLITLIPHELQKVGFNLRKWISNNSKILTTVEDTGDNKVLNIIENECVKTLGLKWEPQKDLFKFSVNC…	1748	139
125	SGTELKEVYTLLTARGLFIDDK	32	22	embryo.dev-embryo	0.38885	0	False	EBZ_32.1_sets_embryo.dev-embryo	105.0	60.0	74.0	4.0	74.0	1.0	1.0	32.1	intergenic;antisense;sense;exonic;intronic;fiveUTR;threeUTR;	TINVDQKKWKNFKLADPDFNKPGRIDLIIGADVYTHILQNGVIKIDGLLGQKTDFGWIVSGCKKSKGKETIVATTIEIKELDRYWEVEEEEKDDIESEICENKFIKTTKKDSDGRYIVSIPFKEDVTLGDSKKQAIARYMNLEKKLKRNEKLKVDYTKFMNEYMDLGHMIEVSDEGKYFLPHQAVIRDSSLTTKLRVVFDASAKTTNNKSLNDIMWVGPRVQKDIFDIIIKWRKWEFVVSADIEKMYRQIKIDNNDQKYQYILWRNSPKEKIKTYKLTTVTYGTASAPYLATRVLVDIADKCKNQVISAIIRNDFYMDDLMTGADSVEEANKLITLIPHELQKVGFNLRKWISNNSKILTTVEDTGDNKVLNIIENECVKTLGLKWEPQKDLFKFSVNC…	1748	139
126	SLNDIMWVGPR	32	11	embryo.dev-embryo	0.00019777	0	False	EBZ_32.1_sets_embryo.dev-embryo	105.0	60.0	74.0	4.0	74.0	1.0	1.0	32.1	intergenic;antisense;sense;exonic;intronic;fiveUTR;threeUTR;	TINVDQKKWKNFKLADPDFNKPGRIDLIIGADVYTHILQNGVIKIDGLLGQKTDFGWIVSGCKKSKGKETIVATTIEIKELDRYWEVEEEEKDDIESEICENKFIKTTKKDSDGRYIVSIPFKEDVTLGDSKKQAIARYMNLEKKLKRNEKLKVDYTKFMNEYMDLGHMIEVSDEGKYFLPHQAVIRDSSLTTKLRVVFDASAKTTNNKSLNDIMWVGPRVQKDIFDIIIKWRKWEFVVSADIEKMYRQIKIDNNDQKYQYILWRNSPKEKIKTYKLTTVTYGTASAPYLATRVLVDIADKCKNQVISAIIRNDFYMDDLMTGADSVEEANKLITLIPHELQKVGFNLRKWISNNSKILTTVEDTGDNKVLNIIENECVKTLGLKWEPQKDLFKFSVNC…	1748	139
127	SLNDIMWVGPRVQK	32	14	embryo	0.19114	0	False	EBZ_32.1_sets_embryo.dev-embryo	105.0	60.0	74.0	4.0	74.0	1.0	1.0	32.1	intergenic;antisense;sense;exonic;intronic;fiveUTR;threeUTR;	TINVDQKKWKNFKLADPDFNKPGRIDLIIGADVYTHILQNGVIKIDGLLGQKTDFGWIVSGCKKSKGKETIVATTIEIKELDRYWEVEEEEKDDIESEICENKFIKTTKKDSDGRYIVSIPFKEDVTLGDSKKQAIARYMNLEKKLKRNEKLKVDYTKFMNEYMDLGHMIEVSDEGKYFLPHQAVIRDSSLTTKLRVVFDASAKTTNNKSLNDIMWVGPRVQKDIFDIIIKWRKWEFVVSADIEKMYRQIKIDNNDQKYQYILWRNSPKEKIKTYKLTTVTYGTASAPYLATRVLVDIADKCKNQVISAIIRNDFYMDDLMTGADSVEEANKLITLIPHELQKVGFNLRKWISNNSKILTTVEDTGDNKVLNIIENECVKTLGLKWEPQKDLFKFSVNC…	1748	139
128	SMQIRIENMTEVLKENYYVYK	32	21	embryo	0.39649	0	False	EBZ_32.1_sets_embryo.dev-embryo	105.0	60.0	74.0	4.0	74.0	1.0	1.0	32.1	intergenic;antisense;sense;exonic;intronic;fiveUTR;threeUTR;	TINVDQKKWKNFKLADPDFNKPGRIDLIIGADVYTHILQNGVIKIDGLLGQKTDFGWIVSGCKKSKGKETIVATTIEIKELDRYWEVEEEEKDDIESEICENKFIKTTKKDSDGRYIVSIPFKEDVTLGDSKKQAIARYMNLEKKLKRNEKLKVDYTKFMNEYMDLGHMIEVSDEGKYFLPHQAVIRDSSLTTKLRVVFDASAKTTNNKSLNDIMWVGPRVQKDIFDIIIKWRKWEFVVSADIEKMYRQIKIDNNDQKYQYILWRNSPKEKIKTYKLTTVTYGTASAPYLATRVLVDIADKCKNQVISAIIRNDFYMDDLMTGADSVEEANKLITLIPHELQKVGFNLRKWISNNSKILTTVEDTGDNKVLNIIENECVKTLGLKWEPQKDLFKFSVNC…	1748	139
129	SYWVELEK	32	8	embryo	0.0056233	0	False	EBZ_32.1_sets_embryo.dev-embryo	105.0	60.0	74.0	4.0	74.0	1.0	1.0	32.1	intergenic;antisense;sense;exonic;intronic;fiveUTR;threeUTR;	TINVDQKKWKNFKLADPDFNKPGRIDLIIGADVYTHILQNGVIKIDGLLGQKTDFGWIVSGCKKSKGKETIVATTIEIKELDRYWEVEEEEKDDIESEICENKFIKTTKKDSDGRYIVSIPFKEDVTLGDSKKQAIARYMNLEKKLKRNEKLKVDYTKFMNEYMDLGHMIEVSDEGKYFLPHQAVIRDSSLTTKLRVVFDASAKTTNNKSLNDIMWVGPRVQKDIFDIIIKWRKWEFVVSADIEKMYRQIKIDNNDQKYQYILWRNSPKEKIKTYKLTTVTYGTASAPYLATRVLVDIADKCKNQVISAIIRNDFYMDDLMTGADSVEEANKLITLIPHELQKVGFNLRKWISNNSKILTTVEDTGDNKVLNIIENECVKTLGLKWEPQKDLFKFSVNC…	1748	139
130	SYWVELEKK	32	9	embryo	0.0053836000000000005	0	False	EBZ_32.1_sets_embryo.dev-embryo	105.0	60.0	74.0	4.0	74.0	1.0	1.0	32.1	intergenic;antisense;sense;exonic;intronic;fiveUTR;threeUTR;	TINVDQKKWKNFKLADPDFNKPGRIDLIIGADVYTHILQNGVIKIDGLLGQKTDFGWIVSGCKKSKGKETIVATTIEIKELDRYWEVEEEEKDDIESEICENKFIKTTKKDSDGRYIVSIPFKEDVTLGDSKKQAIARYMNLEKKLKRNEKLKVDYTKFMNEYMDLGHMIEVSDEGKYFLPHQAVIRDSSLTTKLRVVFDASAKTTNNKSLNDIMWVGPRVQKDIFDIIIKWRKWEFVVSADIEKMYRQIKIDNNDQKYQYILWRNSPKEKIKTYKLTTVTYGTASAPYLATRVLVDIADKCKNQVISAIIRNDFYMDDLMTGADSVEEANKLITLIPHELQKVGFNLRKWISNNSKILTTVEDTGDNKVLNIIENECVKTLGLKWEPQKDLFKFSVNC…	1748	139
131	TDDKILVAHHNIQSESEELLSTPYIGEVSEAPK	32	33	embryo	1.0821e-05	0	False	EBZ_32.1_sets_embryo.dev-embryo	105.0	60.0	74.0	4.0	74.0	1.0	1.0	32.1	intergenic;antisense;sense;exonic;intronic;fiveUTR;threeUTR;	TINVDQKKWKNFKLADPDFNKPGRIDLIIGADVYTHILQNGVIKIDGLLGQKTDFGWIVSGCKKSKGKETIVATTIEIKELDRYWEVEEEEKDDIESEICENKFIKTTKKDSDGRYIVSIPFKEDVTLGDSKKQAIARYMNLEKKLKRNEKLKVDYTKFMNEYMDLGHMIEVSDEGKYFLPHQAVIRDSSLTTKLRVVFDASAKTTNNKSLNDIMWVGPRVQKDIFDIIIKWRKWEFVVSADIEKMYRQIKIDNNDQKYQYILWRNSPKEKIKTYKLTTVTYGTASAPYLATRVLVDIADKCKNQVISAIIRNDFYMDDLMTGADSVEEANKLITLIPHELQKVGFNLRKWISNNSKILTTVEDTGDNKVLNIIENECVKTLGLKWEPQKDLFKFSVNC…	1748	139
132	TDFGWIVSGCK	32	11	embryo.dev-embryo	0.00010247	0	False	EBZ_32.1_sets_embryo.dev-embryo	105.0	60.0	74.0	4.0	74.0	1.0	1.0	32.1	intergenic;antisense;sense;exonic;intronic;fiveUTR;threeUTR;	TINVDQKKWKNFKLADPDFNKPGRIDLIIGADVYTHILQNGVIKIDGLLGQKTDFGWIVSGCKKSKGKETIVATTIEIKELDRYWEVEEEEKDDIESEICENKFIKTTKKDSDGRYIVSIPFKEDVTLGDSKKQAIARYMNLEKKLKRNEKLKVDYTKFMNEYMDLGHMIEVSDEGKYFLPHQAVIRDSSLTTKLRVVFDASAKTTNNKSLNDIMWVGPRVQKDIFDIIIKWRKWEFVVSADIEKMYRQIKIDNNDQKYQYILWRNSPKEKIKTYKLTTVTYGTASAPYLATRVLVDIADKCKNQVISAIIRNDFYMDDLMTGADSVEEANKLITLIPHELQKVGFNLRKWISNNSKILTTVEDTGDNKVLNIIENECVKTLGLKWEPQKDLFKFSVNC…	1748	139
133	TDFGWIVSGCKK	32	12	embryo.dev-embryo	0.002449	0	False	EBZ_32.1_sets_embryo.dev-embryo	105.0	60.0	74.0	4.0	74.0	1.0	1.0	32.1	intergenic;antisense;sense;exonic;intronic;fiveUTR;threeUTR;	TINVDQKKWKNFKLADPDFNKPGRIDLIIGADVYTHILQNGVIKIDGLLGQKTDFGWIVSGCKKSKGKETIVATTIEIKELDRYWEVEEEEKDDIESEICENKFIKTTKKDSDGRYIVSIPFKEDVTLGDSKKQAIARYMNLEKKLKRNEKLKVDYTKFMNEYMDLGHMIEVSDEGKYFLPHQAVIRDSSLTTKLRVVFDASAKTTNNKSLNDIMWVGPRVQKDIFDIIIKWRKWEFVVSADIEKMYRQIKIDNNDQKYQYILWRNSPKEKIKTYKLTTVTYGTASAPYLATRVLVDIADKCKNQVISAIIRNDFYMDDLMTGADSVEEANKLITLIPHELQKVGFNLRKWISNNSKILTTVEDTGDNKVLNIIENECVKTLGLKWEPQKDLFKFSVNC…	1748	139
134	TINVDQK	32	7	embryo	0.4379	0	False	EBZ_32.1_sets_embryo.dev-embryo	105.0	60.0	74.0	4.0	74.0	1.0	1.0	32.1	intergenic;antisense;sense;exonic;intronic;fiveUTR;threeUTR;	TINVDQKKWKNFKLADPDFNKPGRIDLIIGADVYTHILQNGVIKIDGLLGQKTDFGWIVSGCKKSKGKETIVATTIEIKELDRYWEVEEEEKDDIESEICENKFIKTTKKDSDGRYIVSIPFKEDVTLGDSKKQAIARYMNLEKKLKRNEKLKVDYTKFMNEYMDLGHMIEVSDEGKYFLPHQAVIRDSSLTTKLRVVFDASAKTTNNKSLNDIMWVGPRVQKDIFDIIIKWRKWEFVVSADIEKMYRQIKIDNNDQKYQYILWRNSPKEKIKTYKLTTVTYGTASAPYLATRVLVDIADKCKNQVISAIIRNDFYMDDLMTGADSVEEANKLITLIPHELQKVGFNLRKWISNNSKILTTVEDTGDNKVLNIIENECVKTLGLKWEPQKDLFKFSVNC…	1748	139
135	TINVDQKK	32	8	embryo	0.1305	0	False	EBZ_32.1_sets_embryo.dev-embryo	105.0	60.0	74.0	4.0	74.0	1.0	1.0	32.1	intergenic;antisense;sense;exonic;intronic;fiveUTR;threeUTR;	TINVDQKKWKNFKLADPDFNKPGRIDLIIGADVYTHILQNGVIKIDGLLGQKTDFGWIVSGCKKSKGKETIVATTIEIKELDRYWEVEEEEKDDIESEICENKFIKTTKKDSDGRYIVSIPFKEDVTLGDSKKQAIARYMNLEKKLKRNEKLKVDYTKFMNEYMDLGHMIEVSDEGKYFLPHQAVIRDSSLTTKLRVVFDASAKTTNNKSLNDIMWVGPRVQKDIFDIIIKWRKWEFVVSADIEKMYRQIKIDNNDQKYQYILWRNSPKEKIKTYKLTTVTYGTASAPYLATRVLVDIADKCKNQVISAIIRNDFYMDDLMTGADSVEEANKLITLIPHELQKVGFNLRKWISNNSKILTTVEDTGDNKVLNIIENECVKTLGLKWEPQKDLFKFSVNC…	1748	139
136	TRATSGMSKIGIIMAMLFQVSSALPK	32	26	embryo.dev-embryo	0.42371	0	False	EBZ_32.1_sets_embryo.dev-embryo	105.0	60.0	74.0	4.0	74.0	1.0	1.0	32.1	intergenic;antisense;sense;exonic;intronic;fiveUTR;threeUTR;	TINVDQKKWKNFKLADPDFNKPGRIDLIIGADVYTHILQNGVIKIDGLLGQKTDFGWIVSGCKKSKGKETIVATTIEIKELDRYWEVEEEEKDDIESEICENKFIKTTKKDSDGRYIVSIPFKEDVTLGDSKKQAIARYMNLEKKLKRNEKLKVDYTKFMNEYMDLGHMIEVSDEGKYFLPHQAVIRDSSLTTKLRVVFDASAKTTNNKSLNDIMWVGPRVQKDIFDIIIKWRKWEFVVSADIEKMYRQIKIDNNDQKYQYILWRNSPKEKIKTYKLTTVTYGTASAPYLATRVLVDIADKCKNQVISAIIRNDFYMDDLMTGADSVEEANKLITLIPHELQKVGFNLRKWISNNSKILTTVEDTGDNKVLNIIENECVKTLGLKWEPQKDLFKFSVNC…	1748	139
137	TTEDVNSNFR	32	10	embryo	4.4728e-06	0	False	EBZ_32.1_sets_embryo.dev-embryo	105.0	60.0	74.0	4.0	74.0	1.0	1.0	32.1	intergenic;antisense;sense;exonic;intronic;fiveUTR;threeUTR;	TINVDQKKWKNFKLADPDFNKPGRIDLIIGADVYTHILQNGVIKIDGLLGQKTDFGWIVSGCKKSKGKETIVATTIEIKELDRYWEVEEEEKDDIESEICENKFIKTTKKDSDGRYIVSIPFKEDVTLGDSKKQAIARYMNLEKKLKRNEKLKVDYTKFMNEYMDLGHMIEVSDEGKYFLPHQAVIRDSSLTTKLRVVFDASAKTTNNKSLNDIMWVGPRVQKDIFDIIIKWRKWEFVVSADIEKMYRQIKIDNNDQKYQYILWRNSPKEKIKTYKLTTVTYGTASAPYLATRVLVDIADKCKNQVISAIIRNDFYMDDLMTGADSVEEANKLITLIPHELQKVGFNLRKWISNNSKILTTVEDTGDNKVLNIIENECVKTLGLKWEPQKDLFKFSVNC…	1748	139
138	VGFNLRK	32	7	embryo.dev-embryo	0.17027	0	False	EBZ_32.1_sets_embryo.dev-embryo	105.0	60.0	74.0	4.0	74.0	1.0	1.0	32.1	intergenic;antisense;sense;exonic;intronic;fiveUTR;threeUTR;	TINVDQKKWKNFKLADPDFNKPGRIDLIIGADVYTHILQNGVIKIDGLLGQKTDFGWIVSGCKKSKGKETIVATTIEIKELDRYWEVEEEEKDDIESEICENKFIKTTKKDSDGRYIVSIPFKEDVTLGDSKKQAIARYMNLEKKLKRNEKLKVDYTKFMNEYMDLGHMIEVSDEGKYFLPHQAVIRDSSLTTKLRVVFDASAKTTNNKSLNDIMWVGPRVQKDIFDIIIKWRKWEFVVSADIEKMYRQIKIDNNDQKYQYILWRNSPKEKIKTYKLTTVTYGTASAPYLATRVLVDIADKCKNQVISAIIRNDFYMDDLMTGADSVEEANKLITLIPHELQKVGFNLRKWISNNSKILTTVEDTGDNKVLNIIENECVKTLGLKWEPQKDLFKFSVNC…	1748	139
139	VGFNLRKWISNNSK	32	14	embryo.dev-embryo	0.36892	0	False	EBZ_32.1_sets_embryo.dev-embryo	105.0	60.0	74.0	4.0	74.0	1.0	1.0	32.1	intergenic;antisense;sense;exonic;intronic;fiveUTR;threeUTR;	TINVDQKKWKNFKLADPDFNKPGRIDLIIGADVYTHILQNGVIKIDGLLGQKTDFGWIVSGCKKSKGKETIVATTIEIKELDRYWEVEEEEKDDIESEICENKFIKTTKKDSDGRYIVSIPFKEDVTLGDSKKQAIARYMNLEKKLKRNEKLKVDYTKFMNEYMDLGHMIEVSDEGKYFLPHQAVIRDSSLTTKLRVVFDASAKTTNNKSLNDIMWVGPRVQKDIFDIIIKWRKWEFVVSADIEKMYRQIKIDNNDQKYQYILWRNSPKEKIKTYKLTTVTYGTASAPYLATRVLVDIADKCKNQVISAIIRNDFYMDDLMTGADSVEEANKLITLIPHELQKVGFNLRKWISNNSKILTTVEDTGDNKVLNIIENECVKTLGLKWEPQKDLFKFSVNC…	1748	139
140	VGGRLQNSNAEFNVK	32	15	embryo	0.18615	0	False	EBZ_32.1_sets_embryo.dev-embryo	105.0	60.0	74.0	4.0	74.0	1.0	1.0	32.1	intergenic;antisense;sense;exonic;intronic;fiveUTR;threeUTR;	TINVDQKKWKNFKLADPDFNKPGRIDLIIGADVYTHILQNGVIKIDGLLGQKTDFGWIVSGCKKSKGKETIVATTIEIKELDRYWEVEEEEKDDIESEICENKFIKTTKKDSDGRYIVSIPFKEDVTLGDSKKQAIARYMNLEKKLKRNEKLKVDYTKFMNEYMDLGHMIEVSDEGKYFLPHQAVIRDSSLTTKLRVVFDASAKTTNNKSLNDIMWVGPRVQKDIFDIIIKWRKWEFVVSADIEKMYRQIKIDNNDQKYQYILWRNSPKEKIKTYKLTTVTYGTASAPYLATRVLVDIADKCKNQVISAIIRNDFYMDDLMTGADSVEEANKLITLIPHELQKVGFNLRKWISNNSKILTTVEDTGDNKVLNIIENECVKTLGLKWEPQKDLFKFSVNC…	1748	139
141	VGPHVNIIASK	32	11	embryo	0.00051651	0	False	EBZ_32.1_sets_embryo.dev-embryo	105.0	60.0	74.0	4.0	74.0	1.0	1.0	32.1	intergenic;antisense;sense;exonic;intronic;fiveUTR;threeUTR;	TINVDQKKWKNFKLADPDFNKPGRIDLIIGADVYTHILQNGVIKIDGLLGQKTDFGWIVSGCKKSKGKETIVATTIEIKELDRYWEVEEEEKDDIESEICENKFIKTTKKDSDGRYIVSIPFKEDVTLGDSKKQAIARYMNLEKKLKRNEKLKVDYTKFMNEYMDLGHMIEVSDEGKYFLPHQAVIRDSSLTTKLRVVFDASAKTTNNKSLNDIMWVGPRVQKDIFDIIIKWRKWEFVVSADIEKMYRQIKIDNNDQKYQYILWRNSPKEKIKTYKLTTVTYGTASAPYLATRVLVDIADKCKNQVISAIIRNDFYMDDLMTGADSVEEANKLITLIPHELQKVGFNLRKWISNNSKILTTVEDTGDNKVLNIIENECVKTLGLKWEPQKDLFKFSVNC…	1748	139
142	VHKGNDDK	32	8	embryo.dev-embryo	0.8993	0	False	EBZ_32.1_sets_embryo.dev-embryo	105.0	60.0	74.0	4.0	74.0	1.0	1.0	32.1	intergenic;antisense;sense;exonic;intronic;fiveUTR;threeUTR;	TINVDQKKWKNFKLADPDFNKPGRIDLIIGADVYTHILQNGVIKIDGLLGQKTDFGWIVSGCKKSKGKETIVATTIEIKELDRYWEVEEEEKDDIESEICENKFIKTTKKDSDGRYIVSIPFKEDVTLGDSKKQAIARYMNLEKKLKRNEKLKVDYTKFMNEYMDLGHMIEVSDEGKYFLPHQAVIRDSSLTTKLRVVFDASAKTTNNKSLNDIMWVGPRVQKDIFDIIIKWRKWEFVVSADIEKMYRQIKIDNNDQKYQYILWRNSPKEKIKTYKLTTVTYGTASAPYLATRVLVDIADKCKNQVISAIIRNDFYMDDLMTGADSVEEANKLITLIPHELQKVGFNLRKWISNNSKILTTVEDTGDNKVLNIIENECVKTLGLKWEPQKDLFKFSVNC…	1748	139
143	VLNIIENECVK	32	11	embryo.dev-embryo	0.00028388	0	False	EBZ_32.1_sets_embryo.dev-embryo	105.0	60.0	74.0	4.0	74.0	1.0	1.0	32.1	intergenic;antisense;sense;exonic;intronic;fiveUTR;threeUTR;	TINVDQKKWKNFKLADPDFNKPGRIDLIIGADVYTHILQNGVIKIDGLLGQKTDFGWIVSGCKKSKGKETIVATTIEIKELDRYWEVEEEEKDDIESEICENKFIKTTKKDSDGRYIVSIPFKEDVTLGDSKKQAIARYMNLEKKLKRNEKLKVDYTKFMNEYMDLGHMIEVSDEGKYFLPHQAVIRDSSLTTKLRVVFDASAKTTNNKSLNDIMWVGPRVQKDIFDIIIKWRKWEFVVSADIEKMYRQIKIDNNDQKYQYILWRNSPKEKIKTYKLTTVTYGTASAPYLATRVLVDIADKCKNQVISAIIRNDFYMDDLMTGADSVEEANKLITLIPHELQKVGFNLRKWISNNSKILTTVEDTGDNKVLNIIENECVKTLGLKWEPQKDLFKFSVNC…	1748	139
144	VLVDIADK	32	8	embryo.dev-embryo	0.15252000000000002	0	False	EBZ_32.1_sets_embryo.dev-embryo	105.0	60.0	74.0	4.0	74.0	1.0	1.0	32.1	intergenic;antisense;sense;exonic;intronic;fiveUTR;threeUTR;	TINVDQKKWKNFKLADPDFNKPGRIDLIIGADVYTHILQNGVIKIDGLLGQKTDFGWIVSGCKKSKGKETIVATTIEIKELDRYWEVEEEEKDDIESEICENKFIKTTKKDSDGRYIVSIPFKEDVTLGDSKKQAIARYMNLEKKLKRNEKLKVDYTKFMNEYMDLGHMIEVSDEGKYFLPHQAVIRDSSLTTKLRVVFDASAKTTNNKSLNDIMWVGPRVQKDIFDIIIKWRKWEFVVSADIEKMYRQIKIDNNDQKYQYILWRNSPKEKIKTYKLTTVTYGTASAPYLATRVLVDIADKCKNQVISAIIRNDFYMDDLMTGADSVEEANKLITLIPHELQKVGFNLRKWISNNSKILTTVEDTGDNKVLNIIENECVKTLGLKWEPQKDLFKFSVNC…	1748	139
145	VPLFSRHPSK	32	10	embryo	1.0857	0	False	EBZ_32.1_sets_embryo.dev-embryo	105.0	60.0	74.0	4.0	74.0	1.0	1.0	32.1	intergenic;antisense;sense;exonic;intronic;fiveUTR;threeUTR;	TINVDQKKWKNFKLADPDFNKPGRIDLIIGADVYTHILQNGVIKIDGLLGQKTDFGWIVSGCKKSKGKETIVATTIEIKELDRYWEVEEEEKDDIESEICENKFIKTTKKDSDGRYIVSIPFKEDVTLGDSKKQAIARYMNLEKKLKRNEKLKVDYTKFMNEYMDLGHMIEVSDEGKYFLPHQAVIRDSSLTTKLRVVFDASAKTTNNKSLNDIMWVGPRVQKDIFDIIIKWRKWEFVVSADIEKMYRQIKIDNNDQKYQYILWRNSPKEKIKTYKLTTVTYGTASAPYLATRVLVDIADKCKNQVISAIIRNDFYMDDLMTGADSVEEANKLITLIPHELQKVGFNLRKWISNNSKILTTVEDTGDNKVLNIIENECVKTLGLKWEPQKDLFKFSVNC…	1748	139
146	VTMTFPFLNTGIDYAGPYYVK	32	21	embryo	2.8775e-07	0	False	EBZ_32.1_sets_embryo.dev-embryo	105.0	60.0	74.0	4.0	74.0	1.0	1.0	32.1	intergenic;antisense;sense;exonic;intronic;fiveUTR;threeUTR;	TINVDQKKWKNFKLADPDFNKPGRIDLIIGADVYTHILQNGVIKIDGLLGQKTDFGWIVSGCKKSKGKETIVATTIEIKELDRYWEVEEEEKDDIESEICENKFIKTTKKDSDGRYIVSIPFKEDVTLGDSKKQAIARYMNLEKKLKRNEKLKVDYTKFMNEYMDLGHMIEVSDEGKYFLPHQAVIRDSSLTTKLRVVFDASAKTTNNKSLNDIMWVGPRVQKDIFDIIIKWRKWEFVVSADIEKMYRQIKIDNNDQKYQYILWRNSPKEKIKTYKLTTVTYGTASAPYLATRVLVDIADKCKNQVISAIIRNDFYMDDLMTGADSVEEANKLITLIPHELQKVGFNLRKWISNNSKILTTVEDTGDNKVLNIIENECVKTLGLKWEPQKDLFKFSVNC…	1748	139
147	VVFDASAK	32	8	embryo	0.021097	0	False	EBZ_32.1_sets_embryo.dev-embryo	105.0	60.0	74.0	4.0	74.0	1.0	1.0	32.1	intergenic;antisense;sense;exonic;intronic;fiveUTR;threeUTR;	TINVDQKKWKNFKLADPDFNKPGRIDLIIGADVYTHILQNGVIKIDGLLGQKTDFGWIVSGCKKSKGKETIVATTIEIKELDRYWEVEEEEKDDIESEICENKFIKTTKKDSDGRYIVSIPFKEDVTLGDSKKQAIARYMNLEKKLKRNEKLKVDYTKFMNEYMDLGHMIEVSDEGKYFLPHQAVIRDSSLTTKLRVVFDASAKTTNNKSLNDIMWVGPRVQKDIFDIIIKWRKWEFVVSADIEKMYRQIKIDNNDQKYQYILWRNSPKEKIKTYKLTTVTYGTASAPYLATRVLVDIADKCKNQVISAIIRNDFYMDDLMTGADSVEEANKLITLIPHELQKVGFNLRKWISNNSKILTTVEDTGDNKVLNIIENECVKTLGLKWEPQKDLFKFSVNC…	1748	139
148	VVFDASAKTTNNK	32	13	embryo	0.7589199999999999	0	False	EBZ_32.1_sets_embryo.dev-embryo	105.0	60.0	74.0	4.0	74.0	1.0	1.0	32.1	intergenic;antisense;sense;exonic;intronic;fiveUTR;threeUTR;	TINVDQKKWKNFKLADPDFNKPGRIDLIIGADVYTHILQNGVIKIDGLLGQKTDFGWIVSGCKKSKGKETIVATTIEIKELDRYWEVEEEEKDDIESEICENKFIKTTKKDSDGRYIVSIPFKEDVTLGDSKKQAIARYMNLEKKLKRNEKLKVDYTKFMNEYMDLGHMIEVSDEGKYFLPHQAVIRDSSLTTKLRVVFDASAKTTNNKSLNDIMWVGPRVQKDIFDIIIKWRKWEFVVSADIEKMYRQIKIDNNDQKYQYILWRNSPKEKIKTYKLTTVTYGTASAPYLATRVLVDIADKCKNQVISAIIRNDFYMDDLMTGADSVEEANKLITLIPHELQKVGFNLRKWISNNSKILTTVEDTGDNKVLNIIENECVKTLGLKWEPQKDLFKFSVNC…	1748	139
149	VVLSTLAK	32	8	embryo.dev-embryo	0.064326	0	False	EBZ_32.1_sets_embryo.dev-embryo	105.0	60.0	74.0	4.0	74.0	1.0	1.0	32.1	intergenic;antisense;sense;exonic;intronic;fiveUTR;threeUTR;	TINVDQKKWKNFKLADPDFNKPGRIDLIIGADVYTHILQNGVIKIDGLLGQKTDFGWIVSGCKKSKGKETIVATTIEIKELDRYWEVEEEEKDDIESEICENKFIKTTKKDSDGRYIVSIPFKEDVTLGDSKKQAIARYMNLEKKLKRNEKLKVDYTKFMNEYMDLGHMIEVSDEGKYFLPHQAVIRDSSLTTKLRVVFDASAKTTNNKSLNDIMWVGPRVQKDIFDIIIKWRKWEFVVSADIEKMYRQIKIDNNDQKYQYILWRNSPKEKIKTYKLTTVTYGTASAPYLATRVLVDIADKCKNQVISAIIRNDFYMDDLMTGADSVEEANKLITLIPHELQKVGFNLRKWISNNSKILTTVEDTGDNKVLNIIENECVKTLGLKWEPQKDLFKFSVNC…	1748	139
150	WEPQKDLFK	32	9	embryo	0.031048000000000006	0	False	EBZ_32.1_sets_embryo.dev-embryo	105.0	60.0	74.0	4.0	74.0	1.0	1.0	32.1	intergenic;antisense;sense;exonic;intronic;fiveUTR;threeUTR;	TINVDQKKWKNFKLADPDFNKPGRIDLIIGADVYTHILQNGVIKIDGLLGQKTDFGWIVSGCKKSKGKETIVATTIEIKELDRYWEVEEEEKDDIESEICENKFIKTTKKDSDGRYIVSIPFKEDVTLGDSKKQAIARYMNLEKKLKRNEKLKVDYTKFMNEYMDLGHMIEVSDEGKYFLPHQAVIRDSSLTTKLRVVFDASAKTTNNKSLNDIMWVGPRVQKDIFDIIIKWRKWEFVVSADIEKMYRQIKIDNNDQKYQYILWRNSPKEKIKTYKLTTVTYGTASAPYLATRVLVDIADKCKNQVISAIIRNDFYMDDLMTGADSVEEANKLITLIPHELQKVGFNLRKWISNNSKILTTVEDTGDNKVLNIIENECVKTLGLKWEPQKDLFKFSVNC…	1748	139
151	WISNNSKILTTVEDTGDNKVLNIIENECVK	32	30	embryo	0.41762	0	False	EBZ_32.1_sets_embryo.dev-embryo	105.0	60.0	74.0	4.0	74.0	1.0	1.0	32.1	intergenic;antisense;sense;exonic;intronic;fiveUTR;threeUTR;	TINVDQKKWKNFKLADPDFNKPGRIDLIIGADVYTHILQNGVIKIDGLLGQKTDFGWIVSGCKKSKGKETIVATTIEIKELDRYWEVEEEEKDDIESEICENKFIKTTKKDSDGRYIVSIPFKEDVTLGDSKKQAIARYMNLEKKLKRNEKLKVDYTKFMNEYMDLGHMIEVSDEGKYFLPHQAVIRDSSLTTKLRVVFDASAKTTNNKSLNDIMWVGPRVQKDIFDIIIKWRKWEFVVSADIEKMYRQIKIDNNDQKYQYILWRNSPKEKIKTYKLTTVTYGTASAPYLATRVLVDIADKCKNQVISAIIRNDFYMDDLMTGADSVEEANKLITLIPHELQKVGFNLRKWISNNSKILTTVEDTGDNKVLNIIENECVKTLGLKWEPQKDLFKFSVNC…	1748	139
152	WKNFKLADPDFNK	32	13	embryo	3.8045	0	False	EBZ_32.1_sets_embryo.dev-embryo	105.0	60.0	74.0	4.0	74.0	1.0	1.0	32.1	intergenic;antisense;sense;exonic;intronic;fiveUTR;threeUTR;	TINVDQKKWKNFKLADPDFNKPGRIDLIIGADVYTHILQNGVIKIDGLLGQKTDFGWIVSGCKKSKGKETIVATTIEIKELDRYWEVEEEEKDDIESEICENKFIKTTKKDSDGRYIVSIPFKEDVTLGDSKKQAIARYMNLEKKLKRNEKLKVDYTKFMNEYMDLGHMIEVSDEGKYFLPHQAVIRDSSLTTKLRVVFDASAKTTNNKSLNDIMWVGPRVQKDIFDIIIKWRKWEFVVSADIEKMYRQIKIDNNDQKYQYILWRNSPKEKIKTYKLTTVTYGTASAPYLATRVLVDIADKCKNQVISAIIRNDFYMDDLMTGADSVEEANKLITLIPHELQKVGFNLRKWISNNSKILTTVEDTGDNKVLNIIENECVKTLGLKWEPQKDLFKFSVNC…	1748	139
153	WLADPKELWPR	32	11	embryo	0.18815	0	False	EBZ_32.1_sets_embryo.dev-embryo	105.0	60.0	74.0	4.0	74.0	1.0	1.0	32.1	intergenic;antisense;sense;exonic;intronic;fiveUTR;threeUTR;	TINVDQKKWKNFKLADPDFNKPGRIDLIIGADVYTHILQNGVIKIDGLLGQKTDFGWIVSGCKKSKGKETIVATTIEIKELDRYWEVEEEEKDDIESEICENKFIKTTKKDSDGRYIVSIPFKEDVTLGDSKKQAIARYMNLEKKLKRNEKLKVDYTKFMNEYMDLGHMIEVSDEGKYFLPHQAVIRDSSLTTKLRVVFDASAKTTNNKSLNDIMWVGPRVQKDIFDIIIKWRKWEFVVSADIEKMYRQIKIDNNDQKYQYILWRNSPKEKIKTYKLTTVTYGTASAPYLATRVLVDIADKCKNQVISAIIRNDFYMDDLMTGADSVEEANKLITLIPHELQKVGFNLRKWISNNSKILTTVEDTGDNKVLNIIENECVKTLGLKWEPQKDLFKFSVNC…	1748	139
154	WPLGKVEK	32	8	embryo	0.2751	0	False	EBZ_32.1_sets_embryo.dev-embryo	105.0	60.0	74.0	4.0	74.0	1.0	1.0	32.1	intergenic;antisense;sense;exonic;intronic;fiveUTR;threeUTR;	TINVDQKKWKNFKLADPDFNKPGRIDLIIGADVYTHILQNGVIKIDGLLGQKTDFGWIVSGCKKSKGKETIVATTIEIKELDRYWEVEEEEKDDIESEICENKFIKTTKKDSDGRYIVSIPFKEDVTLGDSKKQAIARYMNLEKKLKRNEKLKVDYTKFMNEYMDLGHMIEVSDEGKYFLPHQAVIRDSSLTTKLRVVFDASAKTTNNKSLNDIMWVGPRVQKDIFDIIIKWRKWEFVVSADIEKMYRQIKIDNNDQKYQYILWRNSPKEKIKTYKLTTVTYGTASAPYLATRVLVDIADKCKNQVISAIIRNDFYMDDLMTGADSVEEANKLITLIPHELQKVGFNLRKWISNNSKILTTVEDTGDNKVLNIIENECVKTLGLKWEPQKDLFKFSVNC…	1748	139
155	YFLPHQAVIR	32	10	embryo.dev-embryo	0.0006893	0	False	EBZ_32.1_sets_embryo.dev-embryo	105.0	60.0	74.0	4.0	74.0	1.0	1.0	32.1	intergenic;antisense;sense;exonic;intronic;fiveUTR;threeUTR;	TINVDQKKWKNFKLADPDFNKPGRIDLIIGADVYTHILQNGVIKIDGLLGQKTDFGWIVSGCKKSKGKETIVATTIEIKELDRYWEVEEEEKDDIESEICENKFIKTTKKDSDGRYIVSIPFKEDVTLGDSKKQAIARYMNLEKKLKRNEKLKVDYTKFMNEYMDLGHMIEVSDEGKYFLPHQAVIRDSSLTTKLRVVFDASAKTTNNKSLNDIMWVGPRVQKDIFDIIIKWRKWEFVVSADIEKMYRQIKIDNNDQKYQYILWRNSPKEKIKTYKLTTVTYGTASAPYLATRVLVDIADKCKNQVISAIIRNDFYMDDLMTGADSVEEANKLITLIPHELQKVGFNLRKWISNNSKILTTVEDTGDNKVLNIIENECVKTLGLKWEPQKDLFKFSVNC…	1748	139
156	YIVSIPFKEDVTLGDSK	32	17	embryo	0.00048464	0	False	EBZ_32.1_sets_embryo.dev-embryo	105.0	60.0	74.0	4.0	74.0	1.0	1.0	32.1	intergenic;antisense;sense;exonic;intronic;fiveUTR;threeUTR;	TINVDQKKWKNFKLADPDFNKPGRIDLIIGADVYTHILQNGVIKIDGLLGQKTDFGWIVSGCKKSKGKETIVATTIEIKELDRYWEVEEEEKDDIESEICENKFIKTTKKDSDGRYIVSIPFKEDVTLGDSKKQAIARYMNLEKKLKRNEKLKVDYTKFMNEYMDLGHMIEVSDEGKYFLPHQAVIRDSSLTTKLRVVFDASAKTTNNKSLNDIMWVGPRVQKDIFDIIIKWRKWEFVVSADIEKMYRQIKIDNNDQKYQYILWRNSPKEKIKTYKLTTVTYGTASAPYLATRVLVDIADKCKNQVISAIIRNDFYMDDLMTGADSVEEANKLITLIPHELQKVGFNLRKWISNNSKILTTVEDTGDNKVLNIIENECVKTLGLKWEPQKDLFKFSVNC…	1748	139
157	YIVSIPFKEDVTLGDSKK	32	18	embryo.dev-embryo	0.0003751	0	False	EBZ_32.1_sets_embryo.dev-embryo	105.0	60.0	74.0	4.0	74.0	1.0	1.0	32.1	intergenic;antisense;sense;exonic;intronic;fiveUTR;threeUTR;	TINVDQKKWKNFKLADPDFNKPGRIDLIIGADVYTHILQNGVIKIDGLLGQKTDFGWIVSGCKKSKGKETIVATTIEIKELDRYWEVEEEEKDDIESEICENKFIKTTKKDSDGRYIVSIPFKEDVTLGDSKKQAIARYMNLEKKLKRNEKLKVDYTKFMNEYMDLGHMIEVSDEGKYFLPHQAVIRDSSLTTKLRVVFDASAKTTNNKSLNDIMWVGPRVQKDIFDIIIKWRKWEFVVSADIEKMYRQIKIDNNDQKYQYILWRNSPKEKIKTYKLTTVTYGTASAPYLATRVLVDIADKCKNQVISAIIRNDFYMDDLMTGADSVEEANKLITLIPHELQKVGFNLRKWISNNSKILTTVEDTGDNKVLNIIENECVKTLGLKWEPQKDLFKFSVNC…	1748	139
158	YKENLLLLENIR	32	12	embryo.dev-embryo	4.4479e-06	0	False	EBZ_32.1_sets_embryo.dev-embryo	105.0	60.0	74.0	4.0	74.0	1.0	1.0	32.1	intergenic;antisense;sense;exonic;intronic;fiveUTR;threeUTR;	TINVDQKKWKNFKLADPDFNKPGRIDLIIGADVYTHILQNGVIKIDGLLGQKTDFGWIVSGCKKSKGKETIVATTIEIKELDRYWEVEEEEKDDIESEICENKFIKTTKKDSDGRYIVSIPFKEDVTLGDSKKQAIARYMNLEKKLKRNEKLKVDYTKFMNEYMDLGHMIEVSDEGKYFLPHQAVIRDSSLTTKLRVVFDASAKTTNNKSLNDIMWVGPRVQKDIFDIIIKWRKWEFVVSADIEKMYRQIKIDNNDQKYQYILWRNSPKEKIKTYKLTTVTYGTASAPYLATRVLVDIADKCKNQVISAIIRNDFYMDDLMTGADSVEEANKLITLIPHELQKVGFNLRKWISNNSKILTTVEDTGDNKVLNIIENECVKTLGLKWEPQKDLFKFSVNC…	1748	139
159	YLRECVTCARYK	32	12	embryo.dev-embryo	3.4239	0	False	EBZ_32.1_sets_embryo.dev-embryo	105.0	60.0	74.0	4.0	74.0	1.0	1.0	32.1	intergenic;antisense;sense;exonic;intronic;fiveUTR;threeUTR;	TINVDQKKWKNFKLADPDFNKPGRIDLIIGADVYTHILQNGVIKIDGLLGQKTDFGWIVSGCKKSKGKETIVATTIEIKELDRYWEVEEEEKDDIESEICENKFIKTTKKDSDGRYIVSIPFKEDVTLGDSKKQAIARYMNLEKKLKRNEKLKVDYTKFMNEYMDLGHMIEVSDEGKYFLPHQAVIRDSSLTTKLRVVFDASAKTTNNKSLNDIMWVGPRVQKDIFDIIIKWRKWEFVVSADIEKMYRQIKIDNNDQKYQYILWRNSPKEKIKTYKLTTVTYGTASAPYLATRVLVDIADKCKNQVISAIIRNDFYMDDLMTGADSVEEANKLITLIPHELQKVGFNLRKWISNNSKILTTVEDTGDNKVLNIIENECVKTLGLKWEPQKDLFKFSVNC…	1748	139
160	YQYILWR	32	7	embryo.dev-embryo	0.0055453	0	False	EBZ_32.1_sets_embryo.dev-embryo	105.0	60.0	74.0	4.0	74.0	1.0	1.0	32.1	intergenic;antisense;sense;exonic;intronic;fiveUTR;threeUTR;	TINVDQKKWKNFKLADPDFNKPGRIDLIIGADVYTHILQNGVIKIDGLLGQKTDFGWIVSGCKKSKGKETIVATTIEIKELDRYWEVEEEEKDDIESEICENKFIKTTKKDSDGRYIVSIPFKEDVTLGDSKKQAIARYMNLEKKLKRNEKLKVDYTKFMNEYMDLGHMIEVSDEGKYFLPHQAVIRDSSLTTKLRVVFDASAKTTNNKSLNDIMWVGPRVQKDIFDIIIKWRKWEFVVSADIEKMYRQIKIDNNDQKYQYILWRNSPKEKIKTYKLTTVTYGTASAPYLATRVLVDIADKCKNQVISAIIRNDFYMDDLMTGADSVEEANKLITLIPHELQKVGFNLRKWISNNSKILTTVEDTGDNKVLNIIENECVKTLGLKWEPQKDLFKFSVNC…	1748	139
161	YWIFGLK	32	7	embryo.dev-embryo	0.02626	0	False	EBZ_32.1_sets_embryo.dev-embryo	105.0	60.0	74.0	4.0	74.0	1.0	1.0	32.1	intergenic;antisense;sense;exonic;intronic;fiveUTR;threeUTR;	TINVDQKKWKNFKLADPDFNKPGRIDLIIGADVYTHILQNGVIKIDGLLGQKTDFGWIVSGCKKSKGKETIVATTIEIKELDRYWEVEEEEKDDIESEICENKFIKTTKKDSDGRYIVSIPFKEDVTLGDSKKQAIARYMNLEKKLKRNEKLKVDYTKFMNEYMDLGHMIEVSDEGKYFLPHQAVIRDSSLTTKLRVVFDASAKTTNNKSLNDIMWVGPRVQKDIFDIIIKWRKWEFVVSADIEKMYRQIKIDNNDQKYQYILWRNSPKEKIKTYKLTTVTYGTASAPYLATRVLVDIADKCKNQVISAIIRNDFYMDDLMTGADSVEEANKLITLIPHELQKVGFNLRKWISNNSKILTTVEDTGDNKVLNIIENECVKTLGLKWEPQKDLFKFSVNC…	1748	139
162	DSDGRYIVSIPFKEDVTLGDSK	32	22	dev-embryo	0.15411	0	False	EBZ_32.1_sets_embryo.dev-embryo	105.0	60.0	74.0	4.0	74.0	1.0	1.0	32.1	intergenic;antisense;sense;exonic;intronic;fiveUTR;threeUTR;	TINVDQKKWKNFKLADPDFNKPGRIDLIIGADVYTHILQNGVIKIDGLLGQKTDFGWIVSGCKKSKGKETIVATTIEIKELDRYWEVEEEEKDDIESEICENKFIKTTKKDSDGRYIVSIPFKEDVTLGDSKKQAIARYMNLEKKLKRNEKLKVDYTKFMNEYMDLGHMIEVSDEGKYFLPHQAVIRDSSLTTKLRVVFDASAKTTNNKSLNDIMWVGPRVQKDIFDIIIKWRKWEFVVSADIEKMYRQIKIDNNDQKYQYILWRNSPKEKIKTYKLTTVTYGTASAPYLATRVLVDIADKCKNQVISAIIRNDFYMDDLMTGADSVEEANKLITLIPHELQKVGFNLRKWISNNSKILTTVEDTGDNKVLNIIENECVKTLGLKWEPQKDLFKFSVNC…	1748	139
163	EIAKIQQSLSENLVIPGK	32	18	dev-embryo	0.20816	0	False	EBZ_32.1_sets_embryo.dev-embryo	105.0	60.0	74.0	4.0	74.0	1.0	1.0	32.1	intergenic;antisense;sense;exonic;intronic;fiveUTR;threeUTR;	TINVDQKKWKNFKLADPDFNKPGRIDLIIGADVYTHILQNGVIKIDGLLGQKTDFGWIVSGCKKSKGKETIVATTIEIKELDRYWEVEEEEKDDIESEICENKFIKTTKKDSDGRYIVSIPFKEDVTLGDSKKQAIARYMNLEKKLKRNEKLKVDYTKFMNEYMDLGHMIEVSDEGKYFLPHQAVIRDSSLTTKLRVVFDASAKTTNNKSLNDIMWVGPRVQKDIFDIIIKWRKWEFVVSADIEKMYRQIKIDNNDQKYQYILWRNSPKEKIKTYKLTTVTYGTASAPYLATRVLVDIADKCKNQVISAIIRNDFYMDDLMTGADSVEEANKLITLIPHELQKVGFNLRKWISNNSKILTTVEDTGDNKVLNIIENECVKTLGLKWEPQKDLFKFSVNC…	1748	139
164	ESIKFFMITK	32	10	dev-embryo	0.19687	0	False	EBZ_32.1_sets_embryo.dev-embryo	105.0	60.0	74.0	4.0	74.0	1.0	1.0	32.1	intergenic;antisense;sense;exonic;intronic;fiveUTR;threeUTR;	TINVDQKKWKNFKLADPDFNKPGRIDLIIGADVYTHILQNGVIKIDGLLGQKTDFGWIVSGCKKSKGKETIVATTIEIKELDRYWEVEEEEKDDIESEICENKFIKTTKKDSDGRYIVSIPFKEDVTLGDSKKQAIARYMNLEKKLKRNEKLKVDYTKFMNEYMDLGHMIEVSDEGKYFLPHQAVIRDSSLTTKLRVVFDASAKTTNNKSLNDIMWVGPRVQKDIFDIIIKWRKWEFVVSADIEKMYRQIKIDNNDQKYQYILWRNSPKEKIKTYKLTTVTYGTASAPYLATRVLVDIADKCKNQVISAIIRNDFYMDDLMTGADSVEEANKLITLIPHELQKVGFNLRKWISNNSKILTTVEDTGDNKVLNIIENECVKTLGLKWEPQKDLFKFSVNC…	1748	139
165	EVYTLLTARGLFIDDK	32	16	dev-embryo	0.19783	0	False	EBZ_32.1_sets_embryo.dev-embryo	105.0	60.0	74.0	4.0	74.0	1.0	1.0	32.1	intergenic;antisense;sense;exonic;intronic;fiveUTR;threeUTR;	TINVDQKKWKNFKLADPDFNKPGRIDLIIGADVYTHILQNGVIKIDGLLGQKTDFGWIVSGCKKSKGKETIVATTIEIKELDRYWEVEEEEKDDIESEICENKFIKTTKKDSDGRYIVSIPFKEDVTLGDSKKQAIARYMNLEKKLKRNEKLKVDYTKFMNEYMDLGHMIEVSDEGKYFLPHQAVIRDSSLTTKLRVVFDASAKTTNNKSLNDIMWVGPRVQKDIFDIIIKWRKWEFVVSADIEKMYRQIKIDNNDQKYQYILWRNSPKEKIKTYKLTTVTYGTASAPYLATRVLVDIADKCKNQVISAIIRNDFYMDDLMTGADSVEEANKLITLIPHELQKVGFNLRKWISNNSKILTTVEDTGDNKVLNIIENECVKTLGLKWEPQKDLFKFSVNC…	1748	139
166	LFIQKLWINKSEWDQELSIEDK	32	22	dev-embryo	0.37279	0	False	EBZ_32.1_sets_embryo.dev-embryo	105.0	60.0	74.0	4.0	74.0	1.0	1.0	32.1	intergenic;antisense;sense;exonic;intronic;fiveUTR;threeUTR;	TINVDQKKWKNFKLADPDFNKPGRIDLIIGADVYTHILQNGVIKIDGLLGQKTDFGWIVSGCKKSKGKETIVATTIEIKELDRYWEVEEEEKDDIESEICENKFIKTTKKDSDGRYIVSIPFKEDVTLGDSKKQAIARYMNLEKKLKRNEKLKVDYTKFMNEYMDLGHMIEVSDEGKYFLPHQAVIRDSSLTTKLRVVFDASAKTTNNKSLNDIMWVGPRVQKDIFDIIIKWRKWEFVVSADIEKMYRQIKIDNNDQKYQYILWRNSPKEKIKTYKLTTVTYGTASAPYLATRVLVDIADKCKNQVISAIIRNDFYMDDLMTGADSVEEANKLITLIPHELQKVGFNLRKWISNNSKILTTVEDTGDNKVLNIIENECVKTLGLKWEPQKDLFKFSVNC…	1748	139
167	LIQKQTSVVDSTSNLLK	32	17	dev-embryo	0.21207	0	False	EBZ_32.1_sets_embryo.dev-embryo	105.0	60.0	74.0	4.0	74.0	1.0	1.0	32.1	intergenic;antisense;sense;exonic;intronic;fiveUTR;threeUTR;	TINVDQKKWKNFKLADPDFNKPGRIDLIIGADVYTHILQNGVIKIDGLLGQKTDFGWIVSGCKKSKGKETIVATTIEIKELDRYWEVEEEEKDDIESEICENKFIKTTKKDSDGRYIVSIPFKEDVTLGDSKKQAIARYMNLEKKLKRNEKLKVDYTKFMNEYMDLGHMIEVSDEGKYFLPHQAVIRDSSLTTKLRVVFDASAKTTNNKSLNDIMWVGPRVQKDIFDIIIKWRKWEFVVSADIEKMYRQIKIDNNDQKYQYILWRNSPKEKIKTYKLTTVTYGTASAPYLATRVLVDIADKCKNQVISAIIRNDFYMDDLMTGADSVEEANKLITLIPHELQKVGFNLRKWISNNSKILTTVEDTGDNKVLNIIENECVKTLGLKWEPQKDLFKFSVNC…	1748	139
168	LNNEIKFMK	32	9	dev-embryo	0.98852	0	False	EBZ_32.1_sets_embryo.dev-embryo	105.0	60.0	74.0	4.0	74.0	1.0	1.0	32.1	intergenic;antisense;sense;exonic;intronic;fiveUTR;threeUTR;	TINVDQKKWKNFKLADPDFNKPGRIDLIIGADVYTHILQNGVIKIDGLLGQKTDFGWIVSGCKKSKGKETIVATTIEIKELDRYWEVEEEEKDDIESEICENKFIKTTKKDSDGRYIVSIPFKEDVTLGDSKKQAIARYMNLEKKLKRNEKLKVDYTKFMNEYMDLGHMIEVSDEGKYFLPHQAVIRDSSLTTKLRVVFDASAKTTNNKSLNDIMWVGPRVQKDIFDIIIKWRKWEFVVSADIEKMYRQIKIDNNDQKYQYILWRNSPKEKIKTYKLTTVTYGTASAPYLATRVLVDIADKCKNQVISAIIRNDFYMDDLMTGADSVEEANKLITLIPHELQKVGFNLRKWISNNSKILTTVEDTGDNKVLNIIENECVKTLGLKWEPQKDLFKFSVNC…	1748	139
169	LQNSNAEFNVKHPIILEKCHLTSLLIK	32	27	dev-embryo	0.16598	0	False	EBZ_32.1_sets_embryo.dev-embryo	105.0	60.0	74.0	4.0	74.0	1.0	1.0	32.1	intergenic;antisense;sense;exonic;intronic;fiveUTR;threeUTR;	TINVDQKKWKNFKLADPDFNKPGRIDLIIGADVYTHILQNGVIKIDGLLGQKTDFGWIVSGCKKSKGKETIVATTIEIKELDRYWEVEEEEKDDIESEICENKFIKTTKKDSDGRYIVSIPFKEDVTLGDSKKQAIARYMNLEKKLKRNEKLKVDYTKFMNEYMDLGHMIEVSDEGKYFLPHQAVIRDSSLTTKLRVVFDASAKTTNNKSLNDIMWVGPRVQKDIFDIIIKWRKWEFVVSADIEKMYRQIKIDNNDQKYQYILWRNSPKEKIKTYKLTTVTYGTASAPYLATRVLVDIADKCKNQVISAIIRNDFYMDDLMTGADSVEEANKLITLIPHELQKVGFNLRKWISNNSKILTTVEDTGDNKVLNIIENECVKTLGLKWEPQKDLFKFSVNC…	1748	139
170	LWINKSEWDQELSIEDKNYWEK	32	22	dev-embryo	0.16086	0	False	EBZ_32.1_sets_embryo.dev-embryo	105.0	60.0	74.0	4.0	74.0	1.0	1.0	32.1	intergenic;antisense;sense;exonic;intronic;fiveUTR;threeUTR;	TINVDQKKWKNFKLADPDFNKPGRIDLIIGADVYTHILQNGVIKIDGLLGQKTDFGWIVSGCKKSKGKETIVATTIEIKELDRYWEVEEEEKDDIESEICENKFIKTTKKDSDGRYIVSIPFKEDVTLGDSKKQAIARYMNLEKKLKRNEKLKVDYTKFMNEYMDLGHMIEVSDEGKYFLPHQAVIRDSSLTTKLRVVFDASAKTTNNKSLNDIMWVGPRVQKDIFDIIIKWRKWEFVVSADIEKMYRQIKIDNNDQKYQYILWRNSPKEKIKTYKLTTVTYGTASAPYLATRVLVDIADKCKNQVISAIIRNDFYMDDLMTGADSVEEANKLITLIPHELQKVGFNLRKWISNNSKILTTVEDTGDNKVLNIIENECVKTLGLKWEPQKDLFKFSVNC…	1748	139
171	NINKRVVLSTLAK	32	13	dev-embryo	3.2304	0	False	EBZ_32.1_sets_embryo.dev-embryo	105.0	60.0	74.0	4.0	74.0	1.0	1.0	32.1	intergenic;antisense;sense;exonic;intronic;fiveUTR;threeUTR;	TINVDQKKWKNFKLADPDFNKPGRIDLIIGADVYTHILQNGVIKIDGLLGQKTDFGWIVSGCKKSKGKETIVATTIEIKELDRYWEVEEEEKDDIESEICENKFIKTTKKDSDGRYIVSIPFKEDVTLGDSKKQAIARYMNLEKKLKRNEKLKVDYTKFMNEYMDLGHMIEVSDEGKYFLPHQAVIRDSSLTTKLRVVFDASAKTTNNKSLNDIMWVGPRVQKDIFDIIIKWRKWEFVVSADIEKMYRQIKIDNNDQKYQYILWRNSPKEKIKTYKLTTVTYGTASAPYLATRVLVDIADKCKNQVISAIIRNDFYMDDLMTGADSVEEANKLITLIPHELQKVGFNLRKWISNNSKILTTVEDTGDNKVLNIIENECVKTLGLKWEPQKDLFKFSVNC…	1748	139
172	NTEWNHVKSEDNPADLASR	32	19	dev-embryo	0.26966	0	False	EBZ_32.1_sets_embryo.dev-embryo	105.0	60.0	74.0	4.0	74.0	1.0	1.0	32.1	intergenic;antisense;sense;exonic;intronic;fiveUTR;threeUTR;	TINVDQKKWKNFKLADPDFNKPGRIDLIIGADVYTHILQNGVIKIDGLLGQKTDFGWIVSGCKKSKGKETIVATTIEIKELDRYWEVEEEEKDDIESEICENKFIKTTKKDSDGRYIVSIPFKEDVTLGDSKKQAIARYMNLEKKLKRNEKLKVDYTKFMNEYMDLGHMIEVSDEGKYFLPHQAVIRDSSLTTKLRVVFDASAKTTNNKSLNDIMWVGPRVQKDIFDIIIKWRKWEFVVSADIEKMYRQIKIDNNDQKYQYILWRNSPKEKIKTYKLTTVTYGTASAPYLATRVLVDIADKCKNQVISAIIRNDFYMDDLMTGADSVEEANKLITLIPHELQKVGFNLRKWISNNSKILTTVEDTGDNKVLNIIENECVKTLGLKWEPQKDLFKFSVNC…	1748	139
173	PITKICPLEGIK	32	12	dev-embryo	0.8267899999999999	0	False	EBZ_32.1_sets_embryo.dev-embryo	105.0	60.0	74.0	4.0	74.0	1.0	1.0	32.1	intergenic;antisense;sense;exonic;intronic;fiveUTR;threeUTR;	TINVDQKKWKNFKLADPDFNKPGRIDLIIGADVYTHILQNGVIKIDGLLGQKTDFGWIVSGCKKSKGKETIVATTIEIKELDRYWEVEEEEKDDIESEICENKFIKTTKKDSDGRYIVSIPFKEDVTLGDSKKQAIARYMNLEKKLKRNEKLKVDYTKFMNEYMDLGHMIEVSDEGKYFLPHQAVIRDSSLTTKLRVVFDASAKTTNNKSLNDIMWVGPRVQKDIFDIIIKWRKWEFVVSADIEKMYRQIKIDNNDQKYQYILWRNSPKEKIKTYKLTTVTYGTASAPYLATRVLVDIADKCKNQVISAIIRNDFYMDDLMTGADSVEEANKLITLIPHELQKVGFNLRKWISNNSKILTTVEDTGDNKVLNIIENECVKTLGLKWEPQKDLFKFSVNC…	1748	139
174	RICKGSWPWNSANDNACEIQPLK	32	23	dev-embryo	0.40303	0	False	EBZ_32.1_sets_embryo.dev-embryo	105.0	60.0	74.0	4.0	74.0	1.0	1.0	32.1	intergenic;antisense;sense;exonic;intronic;fiveUTR;threeUTR;	TINVDQKKWKNFKLADPDFNKPGRIDLIIGADVYTHILQNGVIKIDGLLGQKTDFGWIVSGCKKSKGKETIVATTIEIKELDRYWEVEEEEKDDIESEICENKFIKTTKKDSDGRYIVSIPFKEDVTLGDSKKQAIARYMNLEKKLKRNEKLKVDYTKFMNEYMDLGHMIEVSDEGKYFLPHQAVIRDSSLTTKLRVVFDASAKTTNNKSLNDIMWVGPRVQKDIFDIIIKWRKWEFVVSADIEKMYRQIKIDNNDQKYQYILWRNSPKEKIKTYKLTTVTYGTASAPYLATRVLVDIADKCKNQVISAIIRNDFYMDDLMTGADSVEEANKLITLIPHELQKVGFNLRKWISNNSKILTTVEDTGDNKVLNIIENECVKTLGLKWEPQKDLFKFSVNC…	1748	139
175	SKRAPFEFMGSLYHILFGIMDEDDR	32	25	dev-embryo	0.38863	0	False	EBZ_32.1_sets_embryo.dev-embryo	105.0	60.0	74.0	4.0	74.0	1.0	1.0	32.1	intergenic;antisense;sense;exonic;intronic;fiveUTR;threeUTR;	TINVDQKKWKNFKLADPDFNKPGRIDLIIGADVYTHILQNGVIKIDGLLGQKTDFGWIVSGCKKSKGKETIVATTIEIKELDRYWEVEEEEKDDIESEICENKFIKTTKKDSDGRYIVSIPFKEDVTLGDSKKQAIARYMNLEKKLKRNEKLKVDYTKFMNEYMDLGHMIEVSDEGKYFLPHQAVIRDSSLTTKLRVVFDASAKTTNNKSLNDIMWVGPRVQKDIFDIIIKWRKWEFVVSADIEKMYRQIKIDNNDQKYQYILWRNSPKEKIKTYKLTTVTYGTASAPYLATRVLVDIADKCKNQVISAIIRNDFYMDDLMTGADSVEEANKLITLIPHELQKVGFNLRKWISNNSKILTTVEDTGDNKVLNIIENECVKTLGLKWEPQKDLFKFSVNC…	1748	139
176	TINVDQKKWK	32	10	dev-embryo	0.34983000000000003	0	False	EBZ_32.1_sets_embryo.dev-embryo	105.0	60.0	74.0	4.0	74.0	1.0	1.0	32.1	intergenic;antisense;sense;exonic;intronic;fiveUTR;threeUTR;	TINVDQKKWKNFKLADPDFNKPGRIDLIIGADVYTHILQNGVIKIDGLLGQKTDFGWIVSGCKKSKGKETIVATTIEIKELDRYWEVEEEEKDDIESEICENKFIKTTKKDSDGRYIVSIPFKEDVTLGDSKKQAIARYMNLEKKLKRNEKLKVDYTKFMNEYMDLGHMIEVSDEGKYFLPHQAVIRDSSLTTKLRVVFDASAKTTNNKSLNDIMWVGPRVQKDIFDIIIKWRKWEFVVSADIEKMYRQIKIDNNDQKYQYILWRNSPKEKIKTYKLTTVTYGTASAPYLATRVLVDIADKCKNQVISAIIRNDFYMDDLMTGADSVEEANKLITLIPHELQKVGFNLRKWISNNSKILTTVEDTGDNKVLNIIENECVKTLGLKWEPQKDLFKFSVNC…	1748	139
177	TNNKILSLNPFLDK	32	14	dev-embryo	0.87421	0	False	EBZ_32.1_sets_embryo.dev-embryo	105.0	60.0	74.0	4.0	74.0	1.0	1.0	32.1	intergenic;antisense;sense;exonic;intronic;fiveUTR;threeUTR;	TINVDQKKWKNFKLADPDFNKPGRIDLIIGADVYTHILQNGVIKIDGLLGQKTDFGWIVSGCKKSKGKETIVATTIEIKELDRYWEVEEEEKDDIESEICENKFIKTTKKDSDGRYIVSIPFKEDVTLGDSKKQAIARYMNLEKKLKRNEKLKVDYTKFMNEYMDLGHMIEVSDEGKYFLPHQAVIRDSSLTTKLRVVFDASAKTTNNKSLNDIMWVGPRVQKDIFDIIIKWRKWEFVVSADIEKMYRQIKIDNNDQKYQYILWRNSPKEKIKTYKLTTVTYGTASAPYLATRVLVDIADKCKNQVISAIIRNDFYMDDLMTGADSVEEANKLITLIPHELQKVGFNLRKWISNNSKILTTVEDTGDNKVLNIIENECVKTLGLKWEPQKDLFKFSVNC…	1748	139
178	TVVDSKSYWVELEK	32	14	dev-embryo	0.20972	0	False	EBZ_32.1_sets_embryo.dev-embryo	105.0	60.0	74.0	4.0	74.0	1.0	1.0	32.1	intergenic;antisense;sense;exonic;intronic;fiveUTR;threeUTR;	TINVDQKKWKNFKLADPDFNKPGRIDLIIGADVYTHILQNGVIKIDGLLGQKTDFGWIVSGCKKSKGKETIVATTIEIKELDRYWEVEEEEKDDIESEICENKFIKTTKKDSDGRYIVSIPFKEDVTLGDSKKQAIARYMNLEKKLKRNEKLKVDYTKFMNEYMDLGHMIEVSDEGKYFLPHQAVIRDSSLTTKLRVVFDASAKTTNNKSLNDIMWVGPRVQKDIFDIIIKWRKWEFVVSADIEKMYRQIKIDNNDQKYQYILWRNSPKEKIKTYKLTTVTYGTASAPYLATRVLVDIADKCKNQVISAIIRNDFYMDDLMTGADSVEEANKLITLIPHELQKVGFNLRKWISNNSKILTTVEDTGDNKVLNIIENECVKTLGLKWEPQKDLFKFSVNC…	1748	139
179	TYKLTTVTYGTASAPYLATR	32	20	dev-embryo	0.19259	0	False	EBZ_32.1_sets_embryo.dev-embryo	105.0	60.0	74.0	4.0	74.0	1.0	1.0	32.1	intergenic;antisense;sense;exonic;intronic;fiveUTR;threeUTR;	TINVDQKKWKNFKLADPDFNKPGRIDLIIGADVYTHILQNGVIKIDGLLGQKTDFGWIVSGCKKSKGKETIVATTIEIKELDRYWEVEEEEKDDIESEICENKFIKTTKKDSDGRYIVSIPFKEDVTLGDSKKQAIARYMNLEKKLKRNEKLKVDYTKFMNEYMDLGHMIEVSDEGKYFLPHQAVIRDSSLTTKLRVVFDASAKTTNNKSLNDIMWVGPRVQKDIFDIIIKWRKWEFVVSADIEKMYRQIKIDNNDQKYQYILWRNSPKEKIKTYKLTTVTYGTASAPYLATRVLVDIADKCKNQVISAIIRNDFYMDDLMTGADSVEEANKLITLIPHELQKVGFNLRKWISNNSKILTTVEDTGDNKVLNIIENECVKTLGLKWEPQKDLFKFSVNC…	1748	139
180	VPANSKVR	32	8	dev-embryo	0.7784399999999999	0	False	EBZ_32.1_sets_embryo.dev-embryo	105.0	60.0	74.0	4.0	74.0	1.0	1.0	32.1	intergenic;antisense;sense;exonic;intronic;fiveUTR;threeUTR;	TINVDQKKWKNFKLADPDFNKPGRIDLIIGADVYTHILQNGVIKIDGLLGQKTDFGWIVSGCKKSKGKETIVATTIEIKELDRYWEVEEEEKDDIESEICENKFIKTTKKDSDGRYIVSIPFKEDVTLGDSKKQAIARYMNLEKKLKRNEKLKVDYTKFMNEYMDLGHMIEVSDEGKYFLPHQAVIRDSSLTTKLRVVFDASAKTTNNKSLNDIMWVGPRVQKDIFDIIIKWRKWEFVVSADIEKMYRQIKIDNNDQKYQYILWRNSPKEKIKTYKLTTVTYGTASAPYLATRVLVDIADKCKNQVISAIIRNDFYMDDLMTGADSVEEANKLITLIPHELQKVGFNLRKWISNNSKILTTVEDTGDNKVLNIIENECVKTLGLKWEPQKDLFKFSVNC…	1748	139
181	FRTGPAYFSQPVCRQMQPVT	39	20	embryo	0.24403	0	False	EBZ_39.1_sets_embryo	0.0	1.0	0.0	0.0	0.0	0.0	0.0	39.1	antisense;	MRTRIFEVSCYLKLKFRTGPAYFSQPVCRQMQPVT	35	0
182	MRTRIFEVSCYLK	39	13	embryo.dev-embryo.PL	0.001469	0	False	EBZ_39.1_sets_embryo	0.0	1.0	0.0	0.0	0.0	0.0	0.0	39.1	antisense;	MRTRIFEVSCYLKLKFRTGPAYFSQPVCRQMQPVT	35	0
183	FRTGPAYFSQPVCR	39	14	PL	0.20877	0	False	EBZ_39.1_sets_embryo	0.0	1.0	0.0	0.0	0.0	0.0	0.0	39.1	antisense;	MRTRIFEVSCYLKLKFRTGPAYFSQPVCRQMQPVT	35	0
184	IFEVSCYLK	39	9	dev-embryo.PL	0.11115	0	False	EBZ_39.1_sets_embryo	0.0	1.0	0.0	0.0	0.0	0.0	0.0	39.1	antisense;	MRTRIFEVSCYLKLKFRTGPAYFSQPVCRQMQPVT	35	0
185	IFEVSCYLKLK	39	11	PL	0.16082	0	False	EBZ_39.1_sets_embryo	0.0	1.0	0.0	0.0	0.0	0.0	0.0	39.1	antisense;	MRTRIFEVSCYLKLKFRTGPAYFSQPVCRQMQPVT	35	0
186	IFEVSCYLKLKFR	39	13	PL	0.37627	0	False	EBZ_39.1_sets_embryo	0.0	1.0	0.0	0.0	0.0	0.0	0.0	39.1	antisense;	MRTRIFEVSCYLKLKFRTGPAYFSQPVCRQMQPVT	35	0
187	TRIFEVSCYLKLK	39	13	PL	0.20722	0	False	EBZ_39.1_sets_embryo	0.0	1.0	0.0	0.0	0.0	0.0	0.0	39.1	antisense;	MRTRIFEVSCYLKLKFRTGPAYFSQPVCRQMQPVT	35	0
188	EFWHFFRVHQVNGASRQVGMLAR	41	23	embryo.PL	0.22862	0	False	EBZ_41.1_sets_embryo	0.0	1.0	0.0	0.0	0.0	0.0	0.0	41.1	antisense;	ASLTSIKREFWHFFRVHQVNGASRQVGMLARVPLKQC	37	27
189	QVGMLAR	41	7	embryo	0.14140999999999998	0	False	EBZ_41.1_sets_embryo	0.0	1.0	0.0	0.0	0.0	0.0	0.0	41.1	antisense;	ASLTSIKREFWHFFRVHQVNGASRQVGMLARVPLKQC	37	27
190	VHQVNGASRQVGMLAR	41	16	embryo	0.0060827	0	False	EBZ_41.1_sets_embryo	0.0	1.0	0.0	0.0	0.0	0.0	0.0	41.1	antisense;	ASLTSIKREFWHFFRVHQVNGASRQVGMLARVPLKQC	37	27
191	REFWHFFR	41	8	PL	0.048139	0	False	EBZ_41.1_sets_embryo	0.0	1.0	0.0	0.0	0.0	0.0	0.0	41.1	antisense;	ASLTSIKREFWHFFRVHQVNGASRQVGMLARVPLKQC	37	27
192	AINTTTLAEVP	45	11	dev-adult.embryo.dev-embryo.PL	0.00049184	0	False	EBZ_45.1_sets_PL.embryo	0.0	1.0	0.0	0.0	0.0	0.0	0.0	45.1	antisense;	YSRCINNHQMGPSQIHTYVYCGDPAIEKRGIRNRNCFTRAINTTTLAEVP	50	9
193	NRNCFTR	45	7	embryo.dev-embryo	0.4669100000000001	0	False	EBZ_45.1_sets_PL.embryo	0.0	1.0	0.0	0.0	0.0	0.0	0.0	45.1	antisense;	YSRCINNHQMGPSQIHTYVYCGDPAIEKRGIRNRNCFTRAINTTTLAEVP	50	9
194	NRNCFTRAINTTTLAEVP	45	18	embryo	0.37583	0	False	EBZ_45.1_sets_PL.embryo	0.0	1.0	0.0	0.0	0.0	0.0	0.0	45.1	antisense;	YSRCINNHQMGPSQIHTYVYCGDPAIEKRGIRNRNCFTRAINTTTLAEVP	50	9
195	HAWQSRVRTK	46	10	embryo.dev-embryo.PL	0.00079179	0	False	EBZ_46.1_sets_embryo	0.0	0.0	1.0	0.0	1.0	0.0	0.0	46.1	sense;intronic;	IMSVRASRHAWQSRVRTKHALYMHVCETHWILLFSSIAMIPSISYIQIYTRIRAICTMLRAFTYTCTYARVAHNGSLRLRTIIKANAYDFPIVPRLNGKPLRCFRLSLFGFWNLFRCPKLRITESLC	127	1
196	IMSVRASRHAWQSR	46	14	embryo.PL	0.031024	0	False	EBZ_46.1_sets_embryo	0.0	0.0	1.0	0.0	1.0	0.0	0.0	46.1	sense;intronic;	IMSVRASRHAWQSRVRTKHALYMHVCETHWILLFSSIAMIPSISYIQIYTRIRAICTMLRAFTYTCTYARVAHNGSLRLRTIIKANAYDFPIVPRLNGKPLRCFRLSLFGFWNLFRCPKLRITESLC	127	1
197	LNGKPLR	46	7	embryo.dev-embryo	0.41327	0	False	EBZ_46.1_sets_embryo	0.0	0.0	1.0	0.0	1.0	0.0	0.0	46.1	sense;intronic;	IMSVRASRHAWQSRVRTKHALYMHVCETHWILLFSSIAMIPSISYIQIYTRIRAICTMLRAFTYTCTYARVAHNGSLRLRTIIKANAYDFPIVPRLNGKPLRCFRLSLFGFWNLFRCPKLRITESLC	127	1
198	LNGKPLRCFR	46	10	embryo.PL	0.32341	0	False	EBZ_46.1_sets_embryo	0.0	0.0	1.0	0.0	1.0	0.0	0.0	46.1	sense;intronic;	IMSVRASRHAWQSRVRTKHALYMHVCETHWILLFSSIAMIPSISYIQIYTRIRAICTMLRAFTYTCTYARVAHNGSLRLRTIIKANAYDFPIVPRLNGKPLRCFRLSLFGFWNLFRCPKLRITESLC	127	1
199	LRTIIKANAYDFPIVPR	46	17	embryo	0.16571	0	False	EBZ_46.1_sets_embryo	0.0	0.0	1.0	0.0	1.0	0.0	0.0	46.1	sense;intronic;	IMSVRASRHAWQSRVRTKHALYMHVCETHWILLFSSIAMIPSISYIQIYTRIRAICTMLRAFTYTCTYARVAHNGSLRLRTIIKANAYDFPIVPRLNGKPLRCFRLSLFGFWNLFRCPKLRITESLC	127	1
200	LSLFGFWNLFR	46	11	embryo.PL	0.14267	0	False	EBZ_46.1_sets_embryo	0.0	0.0	1.0	0.0	1.0	0.0	0.0	46.1	sense;intronic;	IMSVRASRHAWQSRVRTKHALYMHVCETHWILLFSSIAMIPSISYIQIYTRIRAICTMLRAFTYTCTYARVAHNGSLRLRTIIKANAYDFPIVPRLNGKPLRCFRLSLFGFWNLFRCPKLRITESLC	127	1
201	LSLFGFWNLFRCPK	46	14	embryo	1.099	0	False	EBZ_46.1_sets_embryo	0.0	0.0	1.0	0.0	1.0	0.0	0.0	46.1	sense;intronic;	IMSVRASRHAWQSRVRTKHALYMHVCETHWILLFSSIAMIPSISYIQIYTRIRAICTMLRAFTYTCTYARVAHNGSLRLRTIIKANAYDFPIVPRLNGKPLRCFRLSLFGFWNLFRCPKLRITESLC	127	1
202	TKHALYMHVCETHWILLFSSIAMIPSISYIQIYTR	46	35	embryo	0.18586	0	False	EBZ_46.1_sets_embryo	0.0	0.0	1.0	0.0	1.0	0.0	0.0	46.1	sense;intronic;	IMSVRASRHAWQSRVRTKHALYMHVCETHWILLFSSIAMIPSISYIQIYTRIRAICTMLRAFTYTCTYARVAHNGSLRLRTIIKANAYDFPIVPRLNGKPLRCFRLSLFGFWNLFRCPKLRITESLC	127	1
203	ATDNLDRGPR	51	10	embryo.dev-embryo	0.0021555	0	False	EBZ_51.1_sets_embryo	0.0	1.0	0.0	0.0	0.0	0.0	0.0	51.1	antisense;	RATDNLDRGPRISMVFTIKMLLNILERYLKVTCWTRGWLFLN	42	13
204	ISMVFTIKMLLNILERYLK	51	19	embryo	0.18727	0	False	EBZ_51.1_sets_embryo	0.0	1.0	0.0	0.0	0.0	0.0	0.0	51.1	antisense;	RATDNLDRGPRISMVFTIKMLLNILERYLKVTCWTRGWLFLN	42	13
205	FVIIVNELHGVPFEK	61	15	dev-adult.embryo.dev-embryo.PL	1.1419e-05	0	False	EBZ_61.1_sets_embryo	0.0	1.0	0.0	0.0	0.0	0.0	0.0	61.1	antisense;	FVIIVNELHGVPFEKIRNYCG	21	-1
206	ATGAGGAGGAGVQPFVAGGR	64	20	embryo	0.00078576	0	False	EBZ_64.1_sets_embryo	0.0	0.0	1.0	0.0	0.0	0.0	1.0	64.1	sense;threeUTR;	ATGAGGAGGAGVQPFVAGGRWT	22	-1
208	VMVTGRGTKAECK	69	13	dev-adult.embryo.dev-embryo.PL	0.00075651	0	False	EBZ_69.1_sets_PL.embryo.dev-embryo	0.0	0.0	1.0	0.0	0.0	0.0	0.0	69.1	sense;	VMVTGRGTKAECKCNPQAHKKKIYICTHTHKK	32	1
209	LTTYANSSYKR	70	11	embryo	0.24071	0	False	EBZ_70.1_sets_PL.embryo	0.0	0.0	1.0	0.0	1.0	0.0	0.0	70.1	sense;intronic;	LTTYANSSYKRSAPVLFNRCTTLSAHKSRVFATTQQLWTLSTFTTS	46	-1
210	LTTYANSSYKRSAPVLFNR	70	19	embryo.PL	0.00034807	0	False	EBZ_70.1_sets_PL.embryo	0.0	0.0	1.0	0.0	1.0	0.0	0.0	70.1	sense;intronic;	LTTYANSSYKRSAPVLFNRCTTLSAHKSRVFATTQQLWTLSTFTTS	46	-1
211	LTTYANSSYK	70	10	PL	0.47315	0	False	EBZ_70.1_sets_PL.embryo	0.0	0.0	1.0	0.0	1.0	0.0	0.0	70.1	sense;intronic;	LTTYANSSYKRSAPVLFNRCTTLSAHKSRVFATTQQLWTLSTFTTS	46	-1
212	VFATTQQLWTLSTFTTS	70	17	PL	0.15324000000000002	0	False	EBZ_70.1_sets_PL.embryo	0.0	0.0	1.0	0.0	1.0	0.0	0.0	70.1	sense;intronic;	LTTYANSSYKRSAPVLFNRCTTLSAHKSRVFATTQQLWTLSTFTTS	46	-1
213	SNDLLAAEWPNK	75	12	embryo.dev-embryo.dev-adult	0.00079959	0	False	EBZ_75.1_sets_embryo	0.0	1.0	0.0	0.0	0.0	0.0	0.0	75.1	antisense;	SNDLLAAEWPNKRSSRSDGFPGFEMVECVQLPAWK	35	24
214	SNDLLAAEWPNKRSSR	75	16	embryo	0.38597	0	False	EBZ_75.1_sets_embryo	0.0	1.0	0.0	0.0	0.0	0.0	0.0	75.1	antisense;	SNDLLAAEWPNKRSSRSDGFPGFEMVECVQLPAWK	35	24
215	SNDLLAAEWPNKR	75	13	dev-embryo	0.51747	0	False	EBZ_75.1_sets_embryo	0.0	1.0	0.0	0.0	0.0	0.0	0.0	75.1	antisense;	SNDLLAAEWPNKRSSRSDGFPGFEMVECVQLPAWK	35	24
216	SLVLELEDFWVFHR	76	14	embryo	0.08126699999999999	0	False	EBZ_76.1_sets_embryo	0.0	1.0	0.0	0.0	0.0	0.0	0.0	76.1	antisense;	SLVLELEDFWVFHRIM	16	15
217	SLVLELEDFWVFHRIM	76	16	embryo	0.0022572	0	False	EBZ_76.1_sets_embryo	0.0	1.0	0.0	0.0	0.0	0.0	0.0	76.1	antisense;	SLVLELEDFWVFHRIM	16	15
218	SLEESGKFANIYLSGK	78	16	dev-adult.embryo.dev-embryo.PL	0.00023988	0	False	EBZ_78.1_sets_embryo.dev-embryo	0.0	0.0	1.0	0.0	1.0	0.0	0.0	78.1	sense;intronic;	TSKSLEESGKFANIYLSGKTR	21	-1
221	FTNKQSNNTQNK	84	12	embryo	0.18333	0	False	EBZ_84.1_sets_PL.embryo	0.0	0.0	1.0	0.0	1.0	1.0	0.0	84.1	sense;intronic;fiveUTR;	AAVHRSQPGRYKQLKQLQSKFTNKQSNNTQNKCTKSIQNYKY	42	-1
224	QSNNTQNKCTK	84	11	dev-adult.embryo.PL	0.0002976	0	False	EBZ_84.1_sets_PL.embryo	0.0	0.0	1.0	0.0	1.0	1.0	0.0	84.1	sense;intronic;fiveUTR;	AAVHRSQPGRYKQLKQLQSKFTNKQSNNTQNKCTKSIQNYKY	42	-1
227	SIQNYKY	84	7	embryo	0.5566800000000001	0	False	EBZ_84.1_sets_PL.embryo	0.0	0.0	1.0	0.0	1.0	1.0	0.0	84.1	sense;intronic;fiveUTR;	AAVHRSQPGRYKQLKQLQSKFTNKQSNNTQNKCTKSIQNYKY	42	-1
228	FDSVTKTLIKPSFMAR	88	16	embryo	0.0050732	0	False	EBZ_88.1_sets_embryo	0.0	0.0	1.0	0.0	1.0	0.0	0.0	88.1	sense;intronic;	KSFKFDSVTKTLIKPSFMARNF	22	17
229	SFKFDSVTK	88	9	embryo	0.18254	0	False	EBZ_88.1_sets_embryo	0.0	0.0	1.0	0.0	1.0	0.0	0.0	88.1	sense;intronic;	KSFKFDSVTKTLIKPSFMARNF	22	17
230	IHSLRCTQR	90	9	dev-adult.PL	0.0017957	0	False	EBZ_90.1_sets_embryo.dev-adult	0.0	0.0	1.0	1.0	1.0	0.0	0.0	90.1	sense;exonic;intronic;	LLIRIRFRIHSLRCTQRRQLERLPSRPWKCPNRRLE	36	-1
231	CTQRRQLER	90	9	dev-adult	0.32535	0	False	EBZ_90.1_sets_embryo.dev-adult	0.0	0.0	1.0	1.0	1.0	0.0	0.0	90.1	sense;exonic;intronic;	LLIRIRFRIHSLRCTQRRQLERLPSRPWKCPNRRLE	36	-1
232	IESEFANISNVSCAPLIK	95	18	embryo.dev-embryo	7.0247e-05	0	False	EBZ_95.1_sets_embryo	1.0	0.0	0.0	0.0	0.0	0.0	0.0	95.1	intergenic;	YQRFMGPKIESEFANISNVSCAPLIKRCHTNRST	34	4
233	IESEFANISNVSCAPLIKR	95	19	embryo	0.1578	0	False	EBZ_95.1_sets_embryo	1.0	0.0	0.0	0.0	0.0	0.0	0.0	95.1	intergenic;	YQRFMGPKIESEFANISNVSCAPLIKRCHTNRST	34	4
234	FNANAGDKLTK	96	11	embryo.dev-embryo.PL	0.00084098	0	False	EBZ_96.1_sets_embryo	0.0	1.0	0.0	0.0	0.0	0.0	0.0	96.1	antisense;	RKDEKRFICLLLVKHNEFFKFNANAGDKLTKSAS	34	-1
235	DEKRFICLLLVK	96	12	PL	0.13343	0	False	EBZ_96.1_sets_embryo	0.0	1.0	0.0	0.0	0.0	0.0	0.0	96.1	antisense;	RKDEKRFICLLLVKHNEFFKFNANAGDKLTKSAS	34	-1
236	FICLLLVK	96	8	dev-adult	0.026813	0	False	EBZ_96.1_sets_embryo	0.0	1.0	0.0	0.0	0.0	0.0	0.0	96.1	antisense;	RKDEKRFICLLLVKHNEFFKFNANAGDKLTKSAS	34	-1
237	EEEAATERNILPK	99	13	dev-adult.embryo.dev-embryo.PL	0.00083025	0	False	EBZ_99.1_sets_embryo	0.0	1.0	0.0	0.0	0.0	0.0	0.0	99.1	antisense;	QEESEKIETAKEEEAATERNILPKN	25	-1
238	IETAKEEEAATER	99	13	dev-embryo.PL	0.7720899999999999	0	False	EBZ_99.1_sets_embryo	0.0	1.0	0.0	0.0	0.0	0.0	0.0	99.1	antisense;	QEESEKIETAKEEEAATERNILPKN	25	-1
239	IETAKEEEAATERNILPK	99	18	PL	0.36595	0	False	EBZ_99.1_sets_embryo	0.0	1.0	0.0	0.0	0.0	0.0	0.0	99.1	antisense;	QEESEKIETAKEEEAATERNILPKN	25	-1
240	APEARSSQEFLIRR	100	14	embryo	3.954	0	False	EBZ_100.1_sets_embryo	0.0	0.0	1.0	0.0	0.0	1.0	0.0	100.1	sense;fiveUTR;	QQAKKSHAKLFSLPVFSNNLANFVRIFVVERFIVRQITVCRQLAASVNRTCCPLARTRTRAPEARSSQEFLIRRIPQPWDHIG	83	-1
241	IFVVERFIVRQITVCR	100	16	embryo	0.41233	0	False	EBZ_100.1_sets_embryo	0.0	0.0	1.0	0.0	0.0	1.0	0.0	100.1	sense;fiveUTR;	QQAKKSHAKLFSLPVFSNNLANFVRIFVVERFIVRQITVCRQLAASVNRTCCPLARTRTRAPEARSSQEFLIRRIPQPWDHIG	83	-1
242	IPQPWDHIG	100	9	embryo.dev-embryo	0.002455	0	False	EBZ_100.1_sets_embryo	0.0	0.0	1.0	0.0	0.0	1.0	0.0	100.1	sense;fiveUTR;	QQAKKSHAKLFSLPVFSNNLANFVRIFVVERFIVRQITVCRQLAASVNRTCCPLARTRTRAPEARSSQEFLIRRIPQPWDHIG	83	-1
243	SHAKLFSLPVFSNNLANFVRIFVVER	100	26	embryo	0.16188	0	False	EBZ_100.1_sets_embryo	0.0	0.0	1.0	0.0	0.0	1.0	0.0	100.1	sense;fiveUTR;	QQAKKSHAKLFSLPVFSNNLANFVRIFVVERFIVRQITVCRQLAASVNRTCCPLARTRTRAPEARSSQEFLIRRIPQPWDHIG	83	-1
244	QLAASVNRTCCPLARTR	100	17	PL	0.016651	0	False	EBZ_100.1_sets_embryo	0.0	0.0	1.0	0.0	0.0	1.0	0.0	100.1	sense;fiveUTR;	QQAKKSHAKLFSLPVFSNNLANFVRIFVVERFIVRQITVCRQLAASVNRTCCPLARTRTRAPEARSSQEFLIRRIPQPWDHIG	83	-1
245	SHAKLFSLPVFSNNLANFVR	100	20	PL	0.21194	0	False	EBZ_100.1_sets_embryo	0.0	0.0	1.0	0.0	0.0	1.0	0.0	100.1	sense;fiveUTR;	QQAKKSHAKLFSLPVFSNNLANFVRIFVVERFIVRQITVCRQLAASVNRTCCPLARTRTRAPEARSSQEFLIRRIPQPWDHIG	83	-1
246	SSQEFLIR	100	8	PL	0.4437100000000001	0	False	EBZ_100.1_sets_embryo	0.0	0.0	1.0	0.0	0.0	1.0	0.0	100.1	sense;fiveUTR;	QQAKKSHAKLFSLPVFSNNLANFVRIFVVERFIVRQITVCRQLAASVNRTCCPLARTRTRAPEARSSQEFLIRRIPQPWDHIG	83	-1
247	LFSLPVFSNNLANFVR	100	16	dev-embryo	0.17390999999999998	0	False	EBZ_100.1_sets_embryo	0.0	0.0	1.0	0.0	0.0	1.0	0.0	100.1	sense;fiveUTR;	QQAKKSHAKLFSLPVFSNNLANFVRIFVVERFIVRQITVCRQLAASVNRTCCPLARTRTRAPEARSSQEFLIRRIPQPWDHIG	83	-1
248	LDQLDQVGAHCCDLVYGDEQR	101	21	dev-adult.embryo.dev-embryo.PL	0.00010936	0	False	EBZ_101.1_sets_PL.embryo	0.0	0.0	1.0	0.0	1.0	0.0	0.0	101.1	sense;intronic;	GENPAERLDQLDQVGAHCCDLVYGDEQRTGGVSASGYIVRNVVGHAHQVNSGCRVATGAFLASRLALLL	69	-1
249	NVVGHAHQVNSGCR	101	14	embryo.PL	0.15974000000000002	0	False	EBZ_101.1_sets_PL.embryo	0.0	0.0	1.0	0.0	1.0	0.0	0.0	101.1	sense;intronic;	GENPAERLDQLDQVGAHCCDLVYGDEQRTGGVSASGYIVRNVVGHAHQVNSGCRVATGAFLASRLALLL	69	-1
250	NVVGHAHQVNSGCRVATGAFLASR	101	24	embryo	0.13581	0	False	EBZ_101.1_sets_PL.embryo	0.0	0.0	1.0	0.0	1.0	0.0	0.0	101.1	sense;intronic;	GENPAERLDQLDQVGAHCCDLVYGDEQRTGGVSASGYIVRNVVGHAHQVNSGCRVATGAFLASRLALLL	69	-1
251	TGGVSASGYIVR	101	12	embryo	0.14115	0	False	EBZ_101.1_sets_PL.embryo	0.0	0.0	1.0	0.0	1.0	0.0	0.0	101.1	sense;intronic;	GENPAERLDQLDQVGAHCCDLVYGDEQRTGGVSASGYIVRNVVGHAHQVNSGCRVATGAFLASRLALLL	69	-1
252	KQTFINLK	114	8	embryo	0.10122	0	False	EBZ_114.1_sets_embryo	0.0	0.0	1.0	0.0	1.0	0.0	0.0	114.1	sense;intronic;	FIGLYLCVIVIKFRLIKCFKKQTFINLKLIINLQASNPKNGCPV	44	-1
253	LIINLQASNPK	114	11	embryo.dev-embryo	0.00011296	0	False	EBZ_114.1_sets_embryo	0.0	0.0	1.0	0.0	1.0	0.0	0.0	114.1	sense;intronic;	FIGLYLCVIVIKFRLIKCFKKQTFINLKLIINLQASNPKNGCPV	44	-1
254	QTFINLKLIINLQASNPK	114	18	dev-embryo	0.19332	0	False	EBZ_114.1_sets_embryo	0.0	0.0	1.0	0.0	1.0	0.0	0.0	114.1	sense;intronic;	FIGLYLCVIVIKFRLIKCFKKQTFINLKLIINLQASNPKNGCPV	44	-1
255	LFTVMQMNANLR	119	12	dev-adult.embryo.dev-embryo.PL	0.0029942	0	False	EBZ_119.1_sets_embryo	0.0	1.0	0.0	0.0	0.0	0.0	0.0	119.1	antisense;	LFTVMQMNANLRAETFPTFNQPTSLPANRICQANLQLPR	39	4
256	LFTVMQMNANLRAETFPTFNQPTSLPANRICQANLQLPR	119	39	embryo	0.17492	0	False	EBZ_119.1_sets_embryo	0.0	1.0	0.0	0.0	0.0	0.0	0.0	119.1	antisense;	LFTVMQMNANLRAETFPTFNQPTSLPANRICQANLQLPR	39	4
257	KVQNNISTIYKVHNTPQIGLDR	127	22	embryo	0.21566	0	False	EBZ_127.1_sets_embryo	0.0	0.0	1.0	0.0	1.0	0.0	0.0	127.1	sense;intronic;	ILSTRKVQNNISTIYKVHNTPQIGLDRLRMATPISAKPEINHFATKPSNLMPLPVPSFISARYHTISLLALRCVLCAVRM	80	29
258	PEINHFATK	127	9	embryo	0.39511	0	False	EBZ_127.1_sets_embryo	0.0	0.0	1.0	0.0	1.0	0.0	0.0	127.1	sense;intronic;	ILSTRKVQNNISTIYKVHNTPQIGLDRLRMATPISAKPEINHFATKPSNLMPLPVPSFISARYHTISLLALRCVLCAVRM	80	29
259	VQNNISTIYK	127	10	embryo.dev-embryo	0.004065999999999999	0	False	EBZ_127.1_sets_embryo	0.0	0.0	1.0	0.0	1.0	0.0	0.0	127.1	sense;intronic;	ILSTRKVQNNISTIYKVHNTPQIGLDRLRMATPISAKPEINHFATKPSNLMPLPVPSFISARYHTISLLALRCVLCAVRM	80	29
260	VQNNISTIYKVHNTPQIGLDR	127	21	dev-embryo	0.18169	0	False	EBZ_127.1_sets_embryo	0.0	0.0	1.0	0.0	1.0	0.0	0.0	127.1	sense;intronic;	ILSTRKVQNNISTIYKVHNTPQIGLDRLRMATPISAKPEINHFATKPSNLMPLPVPSFISARYHTISLLALRCVLCAVRM	80	29
261	DVMGQGVSSTGEATLGLRPPLLTTDPVR	130	28	dev-adult.embryo.dev-embryo.PL	0.00015226	0	False	EBZ_130.1_sets_embryo.dev-adult	51.0	29.0	8.0	0.0	8.0	0.0	0.0	130.1	intergenic;antisense;sense;intronic;	DVMGQGVSSTGEATLGLRPPLLTTDPVRHARFFFSTPGSLFTFSVRPSES	50	2
262	FFFSTPGSLFTFSVR	130	15	PL	0.52365	0	False	EBZ_130.1_sets_embryo.dev-adult	51.0	29.0	8.0	0.0	8.0	0.0	0.0	130.1	intergenic;antisense;sense;intronic;	DVMGQGVSSTGEATLGLRPPLLTTDPVRHARFFFSTPGSLFTFSVRPSES	50	2
263	NIQKEMKQTK	133	10	embryo.dev-adult	0.0031504	0	False	EBZ_133.1_sets_embryo.dev-adult	1.0	0.0	0.0	0.0	0.0	0.0	0.0	133.1	intergenic;	RSSKDRSKKNIQKEMKQTKSFM	22	14
264	SSKDRSK	133	7	embryo	0.20499	0	False	EBZ_133.1_sets_embryo.dev-adult	1.0	0.0	0.0	0.0	0.0	0.0	0.0	133.1	intergenic;	RSSKDRSKKNIQKEMKQTKSFM	22	14
265	NIQKEMK	133	7	dev-adult	1.2494	0	False	EBZ_133.1_sets_embryo.dev-adult	1.0	0.0	0.0	0.0	0.0	0.0	0.0	133.1	intergenic;	RSSKDRSKKNIQKEMKQTKSFM	22	14
266	FIALCPKNGK	136	10	embryo	0.99389	0	False	EBZ_136.1_sets_embryo.dev-embryo	0.0	0.0	1.0	0.0	1.0	0.0	0.0	136.1	sense;intronic;	FIALCPKNGKIHESHKVCERWKVCSAKMKPGWYGRVMGVEKDGAWGREGKNSKVAYQNVKLL	62	27
267	IHESHKVCER	136	10	embryo	0.17321	0	False	EBZ_136.1_sets_embryo.dev-embryo	0.0	0.0	1.0	0.0	1.0	0.0	0.0	136.1	sense;intronic;	FIALCPKNGKIHESHKVCERWKVCSAKMKPGWYGRVMGVEKDGAWGREGKNSKVAYQNVKLL	62	27
268	IHESHKVCERWK	136	12	embryo	2.935	0	False	EBZ_136.1_sets_embryo.dev-embryo	0.0	0.0	1.0	0.0	1.0	0.0	0.0	136.1	sense;intronic;	FIALCPKNGKIHESHKVCERWKVCSAKMKPGWYGRVMGVEKDGAWGREGKNSKVAYQNVKLL	62	27
269	MKPGWYGR	136	8	embryo	0.93237	0	False	EBZ_136.1_sets_embryo.dev-embryo	0.0	0.0	1.0	0.0	1.0	0.0	0.0	136.1	sense;intronic;	FIALCPKNGKIHESHKVCERWKVCSAKMKPGWYGRVMGVEKDGAWGREGKNSKVAYQNVKLL	62	27
270	MKPGWYGRVMGVEK	136	14	embryo	3.9634	0	False	EBZ_136.1_sets_embryo.dev-embryo	0.0	0.0	1.0	0.0	1.0	0.0	0.0	136.1	sense;intronic;	FIALCPKNGKIHESHKVCERWKVCSAKMKPGWYGRVMGVEKDGAWGREGKNSKVAYQNVKLL	62	27
271	VCERWKVCSAK	136	11	embryo	3.6556	0	False	EBZ_136.1_sets_embryo.dev-embryo	0.0	0.0	1.0	0.0	1.0	0.0	0.0	136.1	sense;intronic;	FIALCPKNGKIHESHKVCERWKVCSAKMKPGWYGRVMGVEKDGAWGREGKNSKVAYQNVKLL	62	27
272	VMGVEKDGAWGR	136	12	embryo.dev-embryo	0.003926099999999999	0	False	EBZ_136.1_sets_embryo.dev-embryo	0.0	0.0	1.0	0.0	1.0	0.0	0.0	136.1	sense;intronic;	FIALCPKNGKIHESHKVCERWKVCSAKMKPGWYGRVMGVEKDGAWGREGKNSKVAYQNVKLL	62	27
273	VMGVEKDGAWGREGK	136	15	dev-embryo	0.20396	0	False	EBZ_136.1_sets_embryo.dev-embryo	0.0	0.0	1.0	0.0	1.0	0.0	0.0	136.1	sense;intronic;	FIALCPKNGKIHESHKVCERWKVCSAKMKPGWYGRVMGVEKDGAWGREGKNSKVAYQNVKLL	62	27
274	LSHSCGLEQFMK	141	12	embryo	0.0030096	0	False	EBZ_141.1_sets_embryo	0.0	1.0	0.0	0.0	0.0	0.0	0.0	141.1	antisense;	LSHSCGLEQFMKIASDLVYSMWIGYHFIKVLR	32	10
277	INSIHNAFWIPMAMLSEPT	142	19	embryo.dev-embryo.PL	0.0029079	0	False	EBZ_142.1_sets_embryo	0.0	1.0	0.0	0.0	0.0	0.0	0.0	142.1	antisense;	YYRPYPYVMHAGVDVMGGSRQVTIIAVERAVVAARVKVSAPERINSIHNAFWIPMAMLSEPT	62	8
280	QVTIIAVER	142	9	embryo	0.13192	0	False	EBZ_142.1_sets_embryo	0.0	1.0	0.0	0.0	0.0	0.0	0.0	142.1	antisense;	YYRPYPYVMHAGVDVMGGSRQVTIIAVERAVVAARVKVSAPERINSIHNAFWIPMAMLSEPT	62	8
283	VMHAGVDVMGGSR	142	13	embryo.PL	0.14237	0	False	EBZ_142.1_sets_embryo	0.0	1.0	0.0	0.0	0.0	0.0	0.0	142.1	antisense;	YYRPYPYVMHAGVDVMGGSRQVTIIAVERAVVAARVKVSAPERINSIHNAFWIPMAMLSEPT	62	8
286	VMHAGVDVMGGSRQVTIIAVER	142	22	dev-embryo.PL	0.19455	0	False	EBZ_142.1_sets_embryo	0.0	1.0	0.0	0.0	0.0	0.0	0.0	142.1	antisense;	YYRPYPYVMHAGVDVMGGSRQVTIIAVERAVVAARVKVSAPERINSIHNAFWIPMAMLSEPT	62	8
287	IENEHQTELK	148	10	embryo.dev-embryo.dev-adult	0.00044405	0	False	EBZ_148.1_sets_embryo	0.0	1.0	0.0	0.0	0.0	0.0	0.0	148.1	antisense;	CPKMVIITLHLRCIRIYVAQTHADDHSISTSPQKIENEHQTELKIHLKRYLAACPH	56	3
288	IYVAQTHADDHSISTSPQKIENEHQTELKIHLK	148	33	embryo	0.40965	0	False	EBZ_148.1_sets_embryo	0.0	1.0	0.0	0.0	0.0	0.0	0.0	148.1	antisense;	CPKMVIITLHLRCIRIYVAQTHADDHSISTSPQKIENEHQTELKIHLKRYLAACPH	56	3
289	MVIITLHLRCIR	148	12	embryo	1.0398	0	False	EBZ_148.1_sets_embryo	0.0	1.0	0.0	0.0	0.0	0.0	0.0	148.1	antisense;	CPKMVIITLHLRCIRIYVAQTHADDHSISTSPQKIENEHQTELKIHLKRYLAACPH	56	3
290	IWKSGDFFTLVSTWK	153	15	embryo	0.1591	0	False	EBZ_153.1_sets_embryo	0.0	1.0	0.0	0.0	0.0	0.0	0.0	153.1	antisense;	VISITTLELHMEVSCALRAAPLGIRRRIWKSGDFFTLVSTWKMWCPGANFDGSMMPFSYSRFFSHMISSLAARSGKVN	78	10
291	VISITTLELHMEVSCALRAAPLGIRR	153	26	embryo.dev-embryo	0.003653	0	False	EBZ_153.1_sets_embryo	0.0	1.0	0.0	0.0	0.0	0.0	0.0	153.1	antisense;	VISITTLELHMEVSCALRAAPLGIRRRIWKSGDFFTLVSTWKMWCPGANFDGSMMPFSYSRFFSHMISSLAARSGKVN	78	10
292	PSLVDQVTR	155	9	dev-embryo.PL	0.0011495	0	False	EBZ_155.1_sets_embryo	1.0	0.0	0.0	0.0	0.0	0.0	0.0	155.1	intergenic;	QISVISTGAGVKSWQKNGNGSAKKKETNDLCSHRKRKHRQDSVHPPRPSLVDQVTRTF	58	-1
293	ETNDLCSHRKR	155	11	dev-embryo	3.2436	0	False	EBZ_155.1_sets_embryo	1.0	0.0	0.0	0.0	0.0	0.0	0.0	155.1	intergenic;	QISVISTGAGVKSWQKNGNGSAKKKETNDLCSHRKRKHRQDSVHPPRPSLVDQVTRTF	58	-1
294	KETNDLCSHR	155	10	dev-embryo	0.58152	0	False	EBZ_155.1_sets_embryo	1.0	0.0	0.0	0.0	0.0	0.0	0.0	155.1	intergenic;	QISVISTGAGVKSWQKNGNGSAKKKETNDLCSHRKRKHRQDSVHPPRPSLVDQVTRTF	58	-1
295	KFDLHTMTGWPSAVAFR	161	17	dev-adult.embryo.dev-embryo.PL	0.00077235	0	False	EBZ_161.1_sets_PL.embryo.dev-embryo	0.0	0.0	1.0	1.0	0.0	0.0	0.0	161.1	sense;exonic;	RTPNGCRLLRNHLRLWPNSMHCVTNSKRKFDLHTMTGWPSAVAFREIFASVWIVI	55	19
296	LWPNSMHCVTNSKR	161	14	embryo	0.51384	0	False	EBZ_161.1_sets_PL.embryo.dev-embryo	0.0	0.0	1.0	1.0	0.0	0.0	0.0	161.1	sense;exonic;	RTPNGCRLLRNHLRLWPNSMHCVTNSKRKFDLHTMTGWPSAVAFREIFASVWIVI	55	19
297	TPNGCRLLR	161	9	embryo	1.1644	0	False	EBZ_161.1_sets_PL.embryo.dev-embryo	0.0	0.0	1.0	1.0	0.0	0.0	0.0	161.1	sense;exonic;	RTPNGCRLLRNHLRLWPNSMHCVTNSKRKFDLHTMTGWPSAVAFREIFASVWIVI	55	19
298	FDLHTMTGWPSAVAFR	161	16	PL	0.29671	0	False	EBZ_161.1_sets_PL.embryo.dev-embryo	0.0	0.0	1.0	1.0	0.0	0.0	0.0	161.1	sense;exonic;	RTPNGCRLLRNHLRLWPNSMHCVTNSKRKFDLHTMTGWPSAVAFREIFASVWIVI	55	19
299	FDLHTMTGWPSAVAFREIFASVWIVI	161	26	PL	0.14161	0	False	EBZ_161.1_sets_PL.embryo.dev-embryo	0.0	0.0	1.0	1.0	0.0	0.0	0.0	161.1	sense;exonic;	RTPNGCRLLRNHLRLWPNSMHCVTNSKRKFDLHTMTGWPSAVAFREIFASVWIVI	55	19
300	RKFDLHTMTGWPSAVAFR	161	18	PL	0.20673	0	False	EBZ_161.1_sets_PL.embryo.dev-embryo	0.0	0.0	1.0	1.0	0.0	0.0	0.0	161.1	sense;exonic;	RTPNGCRLLRNHLRLWPNSMHCVTNSKRKFDLHTMTGWPSAVAFREIFASVWIVI	55	19
301	LLRNHLR	161	7	dev-embryo	0.25356	0	False	EBZ_161.1_sets_PL.embryo.dev-embryo	0.0	0.0	1.0	1.0	0.0	0.0	0.0	161.1	sense;exonic;	RTPNGCRLLRNHLRLWPNSMHCVTNSKRKFDLHTMTGWPSAVAFREIFASVWIVI	55	19
302	IPVIGRLQPMI	162	11	dev-adult.embryo.dev-embryo.PL	0.0032804	0	False	EBZ_162.1_sets_embryo.dev-embryo	0.0	0.0	1.0	1.0	0.0	0.0	0.0	162.1	sense;exonic;	LESIRIPVIGRLQPMI	16	14
303	EVANTNPVGGK	164	11	embryo	0.26678	0	False	EBZ_164.1_sets_embryo	0.0	0.0	1.0	0.0	1.0	0.0	0.0	164.1	sense;intronic;	EVLTDADCHQIPGSSRSKRESEGVKSSPGSWQVFLQPLHVSRIEQVIQKGCKEVANTNPVGGKQATKPSQQVSCYPLCKGHDSILSMALKCSN	93	86
304	EVLTDADCHQIPGSSR	164	16	embryo	0.15605	0	False	EBZ_164.1_sets_embryo	0.0	0.0	1.0	0.0	1.0	0.0	0.0	164.1	sense;intronic;	EVLTDADCHQIPGSSRSKRESEGVKSSPGSWQVFLQPLHVSRIEQVIQKGCKEVANTNPVGGKQATKPSQQVSCYPLCKGHDSILSMALKCSN	93	86
305	PSQQVSCYPLCK	164	12	embryo	2.4635e-06	0	False	EBZ_164.1_sets_embryo	0.0	0.0	1.0	0.0	1.0	0.0	0.0	164.1	sense;intronic;	EVLTDADCHQIPGSSRSKRESEGVKSSPGSWQVFLQPLHVSRIEQVIQKGCKEVANTNPVGGKQATKPSQQVSCYPLCKGHDSILSMALKCSN	93	86
306	PSQQVSCYPLCKGHDSILSMALK	164	23	embryo	0.20881	0	False	EBZ_164.1_sets_embryo	0.0	0.0	1.0	0.0	1.0	0.0	0.0	164.1	sense;intronic;	EVLTDADCHQIPGSSRSKRESEGVKSSPGSWQVFLQPLHVSRIEQVIQKGCKEVANTNPVGGKQATKPSQQVSCYPLCKGHDSILSMALKCSN	93	86
307	CLASLLSLVNLIGESKSVSIRCIEIFE	168	27	embryo	0.4362	0	False	EBZ_168.1_sets_embryo	0.0	1.0	0.0	0.0	0.0	0.0	0.0	168.1	antisense;	LSSAGLMQLWIKCLASLLSLVNLIGESKSVSIRCIEIFE	39	6
308	LSSAGLMQLWIK	168	12	embryo	0.0012001	0	False	EBZ_168.1_sets_embryo	0.0	1.0	0.0	0.0	0.0	0.0	0.0	168.1	antisense;	LSSAGLMQLWIKCLASLLSLVNLIGESKSVSIRCIEIFE	39	6
309	CLASLLSLVNLIGESK	168	16	PL	0.16515	0	False	EBZ_168.1_sets_embryo	0.0	1.0	0.0	0.0	0.0	0.0	0.0	168.1	antisense;	LSSAGLMQLWIKCLASLLSLVNLIGESKSVSIRCIEIFE	39	6
310	INKSNVEFRMTTEYLYHSLR	169	20	dev-adult.embryo.dev-embryo.PL	0.0034642	0	False	EBZ_169.1_sets_embryo.dev-adult	0.0	1.0	0.0	0.0	0.0	0.0	0.0	169.1	antisense;	INKSNVEFRMTTEYLYHSLRC	21	9
311	MTTEYLYHSLR	169	11	embryo	0.44829	0	False	EBZ_169.1_sets_embryo.dev-adult	0.0	1.0	0.0	0.0	0.0	0.0	0.0	169.1	antisense;	INKSNVEFRMTTEYLYHSLRC	21	9
312	SNVEFRMTTEYLYHSLR	169	17	PL	0.20972	0	False	EBZ_169.1_sets_embryo.dev-adult	0.0	1.0	0.0	0.0	0.0	0.0	0.0	169.1	antisense;	INKSNVEFRMTTEYLYHSLRC	21	9
313	SNVEFRMTTEYLYHSLRC	169	18	PL	0.38684	0	False	EBZ_169.1_sets_embryo.dev-adult	0.0	1.0	0.0	0.0	0.0	0.0	0.0	169.1	antisense;	INKSNVEFRMTTEYLYHSLRC	21	9
314	APGGHPCIHSHPVTNATLK	172	19	embryo.PL	0.0021776	0	False	EBZ_172.1_sets_embryo	0.0	0.0	1.0	0.0	0.0	0.0	1.0	172.1	sense;threeUTR;	APGGHPCIHSHPVTNATLKLFISIAFHNVVLCVVIII	37	-1
316	AQDLLIPAAR	184	10	embryo.PL	0.4451100000000001	0	False	EBZ_184.1_sets_embryo.dev-embryo	0.0	0.0	1.0	0.0	0.0	0.0	0.0	184.1	sense;	FFVTVLIRIVLKSTVDRISGIGITKKDAGHHSKAQDLLIPAAR	43	-1
318	KDAGHHSK	184	8	embryo	1.7443	0	False	EBZ_184.1_sets_embryo.dev-embryo	0.0	0.0	1.0	0.0	0.0	0.0	0.0	184.1	sense;	FFVTVLIRIVLKSTVDRISGIGITKKDAGHHSKAQDLLIPAAR	43	-1
320	STVDRISGIGITK	184	13	embryo.dev-embryo.PL	0.00020836	0	False	EBZ_184.1_sets_embryo.dev-embryo	0.0	0.0	1.0	0.0	0.0	0.0	0.0	184.1	sense;	FFVTVLIRIVLKSTVDRISGIGITKKDAGHHSKAQDLLIPAAR	43	-1
322	ISGIGITK	184	8	PL	0.010436	0	False	EBZ_184.1_sets_embryo.dev-embryo	0.0	0.0	1.0	0.0	0.0	0.0	0.0	184.1	sense;	FFVTVLIRIVLKSTVDRISGIGITKKDAGHHSKAQDLLIPAAR	43	-1
323	FKFNFSLNVSK	186	11	embryo	0.18184	0	False	EBZ_186.1_sets_embryo	0.0	0.0	1.0	0.0	1.0	0.0	0.0	186.1	sense;intronic;	KFKFNFSLNVSKQSNEAIHSPAHMHSITLLSGAVWRSGIYTRRRWAEGAGQVGLGSGCIVCNCTERKLVVHT	72	23
324	QSNEAIHSPAHMHSITLLSGAVWR	186	24	embryo.dev-embryo.PL	5.8287e-05	0	False	EBZ_186.1_sets_embryo	0.0	0.0	1.0	0.0	1.0	0.0	0.0	186.1	sense;intronic;	KFKFNFSLNVSKQSNEAIHSPAHMHSITLLSGAVWRSGIYTRRRWAEGAGQVGLGSGCIVCNCTERKLVVHT	72	23
325	LPMMGHGR	193	8	embryo.dev-embryo.dev-adult	0.13226	0	False	EBZ_193.1_sets_embryo.dev-adult	0.0	1.0	0.0	0.0	0.0	0.0	0.0	193.1	antisense;	RLPMMGHGRGPGAWVYF	17	3
326	RLPMMGHGR	193	9	dev-adult.embryo.dev-embryo.PL	0.00049461	0	False	EBZ_193.1_sets_embryo.dev-adult	0.0	1.0	0.0	0.0	0.0	0.0	0.0	193.1	antisense;	RLPMMGHGRGPGAWVYF	17	3
327	GPGAWVYF	193	8	dev-adult.PL	0.39236	0	False	EBZ_193.1_sets_embryo.dev-adult	0.0	1.0	0.0	0.0	0.0	0.0	0.0	193.1	antisense;	RLPMMGHGRGPGAWVYF	17	3
328	SAGQLYFRFLR	196	11	embryo	0.00060721	0	False	EBZ_196.5_sets_embryo	0.0	1.0	0.0	0.0	0.0	0.0	0.0	196.5	antisense;	SAGQLYFRFLRFSKRRDRSSKSISSSSFFFSAPAPGISGRSLGTLGSEGKSNAGGALGSVGLPGGSLDRGCGFGLLAFCEG	81	-1
333	SLGTLGSEGK	196	10	embryo	0.21828000000000006	0	False	EBZ_196.5_sets_embryo	0.0	1.0	0.0	0.0	0.0	0.0	0.0	196.5	antisense;	SAGQLYFRFLRFSKRRDRSSKSISSSSFFFSAPAPGISGRSLGTLGSEGKSNAGGALGSVGLPGGSLDRGCGFGLLAFCEG	81	-1
339	IQLNEFFFSLIHDGTTQNRSIVYILR	197	26	embryo	0.14832	0	False	EBZ_197.1_sets_embryo	0.0	0.0	1.0	0.0	0.0	0.0	1.0	197.1	sense;threeUTR;	PNHQLENVIRIQLNEFFFSLIHDGTTQNRSIVYILRNIQSWERTKW	46	-1
341	NIQSWERT	197	8	embryo	0.085165	0	False	EBZ_197.1_sets_embryo	0.0	0.0	1.0	0.0	0.0	0.0	1.0	197.1	sense;threeUTR;	PNHQLENVIRIQLNEFFFSLIHDGTTQNRSIVYILRNIQSWERTKW	46	-1
343	PNHQLENVIR	197	10	embryo	0.00090171	0	False	EBZ_197.1_sets_embryo	0.0	0.0	1.0	0.0	0.0	0.0	1.0	197.1	sense;threeUTR;	PNHQLENVIRIQLNEFFFSLIHDGTTQNRSIVYILRNIQSWERTKW	46	-1
345	SIVYILRNIQSWER	197	14	embryo	0.99911	0	False	EBZ_197.1_sets_embryo	0.0	0.0	1.0	0.0	0.0	0.0	1.0	197.1	sense;threeUTR;	PNHQLENVIRIQLNEFFFSLIHDGTTQNRSIVYILRNIQSWERTKW	46	-1
346	LENNNSPAK	199	9	embryo.dev-embryo.dev-adult	0.00024693	0	False	EBZ_199.1_sets_embryo.dev-embryo	0.0	0.0	1.0	0.0	1.0	0.0	0.0	199.1	sense;intronic;	LENNNSPAKVAGPLPLFGCMPRVAPCCTMIYFRVESSESSGMKR	44	19
347	VAGPLPLFGCMPRVAPCCTMIYFR	199	24	embryo.dev-adult	0.20895	0	False	EBZ_199.1_sets_embryo.dev-embryo	0.0	0.0	1.0	0.0	1.0	0.0	0.0	199.1	sense;intronic;	LENNNSPAKVAGPLPLFGCMPRVAPCCTMIYFRVESSESSGMKR	44	19
348	VAPCCTMIYFR	199	11	embryo.dev-embryo	0.43322	0	False	EBZ_199.1_sets_embryo.dev-embryo	0.0	0.0	1.0	0.0	1.0	0.0	0.0	199.1	sense;intronic;	LENNNSPAKVAGPLPLFGCMPRVAPCCTMIYFRVESSESSGMKR	44	19
349	FEALCSMQQQYAVVRLPNILTGSVIKLLC	201	29	dev-embryo	0.1546	0	False	EBZ_201.1_sets_embryo.dev-embryo	0.0	1.0	0.0	0.0	0.0	0.0	0.0	201.1	antisense;	HRACFAKRLNTLFFWSRSNSRKFEALCSMQQQYAVVRLPNILTGSVIKLLC	51	28
350	KFEALCSMQQQYAVVRLPNILTGSVIK	201	27	dev-embryo	0.15689	0	False	EBZ_201.1_sets_embryo.dev-embryo	0.0	1.0	0.0	0.0	0.0	0.0	0.0	201.1	antisense;	HRACFAKRLNTLFFWSRSNSRKFEALCSMQQQYAVVRLPNILTGSVIKLLC	51	28
351	LNTLFFWSRSNSRK	201	14	dev-embryo	3.305	0	False	EBZ_201.1_sets_embryo.dev-embryo	0.0	1.0	0.0	0.0	0.0	0.0	0.0	201.1	antisense;	HRACFAKRLNTLFFWSRSNSRKFEALCSMQQQYAVVRLPNILTGSVIKLLC	51	28
352	LPNILTGSVIK	201	11	dev-embryo	0.00011231	0	False	EBZ_201.1_sets_embryo.dev-embryo	0.0	1.0	0.0	0.0	0.0	0.0	0.0	201.1	antisense;	HRACFAKRLNTLFFWSRSNSRKFEALCSMQQQYAVVRLPNILTGSVIKLLC	51	28
353	NELLCNGERR	203	10	dev-adult.embryo.PL	0.00055949	0	False	EBZ_203.1_sets_PL.embryo	0.0	1.0	0.0	0.0	0.0	0.0	0.0	203.1	antisense;	REAGSSCFSLDLRNELLCNGERRSIELNANAN	32	-1
354	NELLCNGERRSIELNANAN	203	19	embryo.PL	0.12049	0	False	EBZ_203.1_sets_PL.embryo	0.0	1.0	0.0	0.0	0.0	0.0	0.0	203.1	antisense;	REAGSSCFSLDLRNELLCNGERRSIELNANAN	32	-1
355	SIELNANAN	203	9	embryo.PL	0.12559	0	False	EBZ_203.1_sets_PL.embryo	0.0	1.0	0.0	0.0	0.0	0.0	0.0	203.1	antisense;	REAGSSCFSLDLRNELLCNGERRSIELNANAN	32	-1
356	REAGSSCFSLDLR	203	13	PL	0.45446	0	False	EBZ_203.1_sets_PL.embryo	0.0	1.0	0.0	0.0	0.0	0.0	0.0	203.1	antisense;	REAGSSCFSLDLRNELLCNGERRSIELNANAN	32	-1
357	HPITVGIAVVSK	207	12	embryo	0.15514	0	False	EBZ_207.1_sets_embryo	0.0	0.0	1.0	0.0	1.0	0.0	0.0	207.1	sense;intronic;	PRGLWRICILNVACHRRHRHPITVGIAVVSKS	32	-1
358	ICILNVACHRRHR	207	13	embryo	0.01379	0	False	EBZ_207.1_sets_embryo	0.0	0.0	1.0	0.0	1.0	0.0	0.0	207.1	sense;intronic;	PRGLWRICILNVACHRRHRHPITVGIAVVSKS	32	-1
359	LSGSPEMRTR	210	10	dev-adult.embryo.dev-embryo.PL	0.00060175	0	False	EBZ_210.1_sets_PL.embryo	0.0	1.0	0.0	0.0	0.0	0.0	0.0	210.1	antisense;	LSGSPEMRTRSSFVTYAHEVITTREKCFKFYLIFKG	36	6
360	LSGSPEMRTRSSFVTYAHEVITTR	210	24	embryo.dev-embryo	0.23133	0	False	EBZ_210.1_sets_PL.embryo	0.0	1.0	0.0	0.0	0.0	0.0	0.0	210.1	antisense;	LSGSPEMRTRSSFVTYAHEVITTREKCFKFYLIFKG	36	6
361	PLSTMSVSEAKDSPNGKPMR	211	20	embryo.dev-adult	0.015482	0	False	EBZ_211.1_sets_embryo.dev-adult	0.0	0.0	1.0	0.0	1.0	0.0	0.0	211.1	sense;intronic;	PLSTMSVSEAKDSPNGKPMRTADS	24	4
362	PASTELK	216	7	embryo	0.43357	0	False	EBZ_216.1_sets_embryo	1.0	0.0	0.0	0.0	0.0	0.0	0.0	216.1	intergenic;	NCSSVARPSEKHFSIWRPASTELKPSELDSRRSAFTFQLILVAAELWYFI	50	-1
363	PASTELKPSELDSRR	216	15	embryo	0.15435	0	False	EBZ_216.1_sets_embryo	1.0	0.0	0.0	0.0	0.0	0.0	0.0	216.1	intergenic;	NCSSVARPSEKHFSIWRPASTELKPSELDSRRSAFTFQLILVAAELWYFI	50	-1
364	PSEKHFSIWR	216	10	dev-adult.embryo.dev-embryo.PL	0.0093457	0	False	EBZ_216.1_sets_embryo	1.0	0.0	0.0	0.0	0.0	0.0	0.0	216.1	intergenic;	NCSSVARPSEKHFSIWRPASTELKPSELDSRRSAFTFQLILVAAELWYFI	50	-1
365	LNSENYECLAQR	229	12	dev-adult.embryo.dev-embryo.PL	0.0023392	0	False	EBZ_229.1_sets_embryo	10.0	2.0	2.0	0.0	2.0	0.0	0.0	229.1	intergenic;antisense;sense;intronic;	HVSTVWFCQFASRTGRLNSENYECLAQR	28	-1
367	HVSTVWFCQFASRTGR	229	16	dev-adult	0.20314	0	False	EBZ_229.1_sets_embryo	10.0	2.0	2.0	0.0	2.0	0.0	0.0	229.1	intergenic;antisense;sense;intronic;	HVSTVWFCQFASRTGRLNSENYECLAQR	28	-1
369	FNMYTFLIIHR	235	11	dev-adult.embryo.dev-embryo.PL	0.00072432	0	False	EBZ_235.1_sets_embryo	0.0	1.0	0.0	0.0	0.0	0.0	0.0	235.1	antisense;	FNMYTFLIIHRFYIECEHERHLAAEYPSVDLRNLRVLH	38	2
370	FNMYTFLIIHRFYIECEHERHLAAEYPSVDLR	235	32	embryo	0.40689	0	False	EBZ_235.1_sets_embryo	0.0	1.0	0.0	0.0	0.0	0.0	0.0	235.1	antisense;	FNMYTFLIIHRFYIECEHERHLAAEYPSVDLRNLRVLH	38	2
371	FNMYTFLIIHRFYIECEHER	235	20	dev-adult.PL	0.21543	0	False	EBZ_235.1_sets_embryo	0.0	1.0	0.0	0.0	0.0	0.0	0.0	235.1	antisense;	FNMYTFLIIHRFYIECEHERHLAAEYPSVDLRNLRVLH	38	2
372	FYIECEHER	235	9	dev-adult.PL	0.13884000000000002	0	False	EBZ_235.1_sets_embryo	0.0	1.0	0.0	0.0	0.0	0.0	0.0	235.1	antisense;	FNMYTFLIIHRFYIECEHERHLAAEYPSVDLRNLRVLH	38	2
373	HLAAEYPSVDLR	235	12	dev-embryo	0.19423	0	False	EBZ_235.1_sets_embryo	0.0	1.0	0.0	0.0	0.0	0.0	0.0	235.1	antisense;	FNMYTFLIIHRFYIECEHERHLAAEYPSVDLRNLRVLH	38	2
374	LSNMYLCTYMHCFGPSRTENAFKSISEICLER	245	32	embryo	0.24027	0	False	EBZ_245.1_sets_embryo	0.0	0.0	1.0	0.0	1.0	0.0	1.0	245.1	sense;intronic;threeUTR;	NAADVGQKLRLSNMYLCTYMHCFGPSRTENAFKSISEICLERFRRVSKLRRYRT	54	13
375	SISEICLER	245	9	embryo	0.042948	0	False	EBZ_245.1_sets_embryo	0.0	0.0	1.0	0.0	1.0	0.0	1.0	245.1	sense;intronic;threeUTR;	NAADVGQKLRLSNMYLCTYMHCFGPSRTENAFKSISEICLERFRRVSKLRRYRT	54	13
376	SISEICLERFR	245	11	embryo	3.5358000000000003e-11	0	False	EBZ_245.1_sets_embryo	0.0	0.0	1.0	0.0	1.0	0.0	1.0	245.1	sense;intronic;threeUTR;	NAADVGQKLRLSNMYLCTYMHCFGPSRTENAFKSISEICLERFRRVSKLRRYRT	54	13
377	SISEICLERFRR	245	12	embryo	1.9578	0	False	EBZ_245.1_sets_embryo	0.0	0.0	1.0	0.0	1.0	0.0	1.0	245.1	sense;intronic;threeUTR;	NAADVGQKLRLSNMYLCTYMHCFGPSRTENAFKSISEICLERFRRVSKLRRYRT	54	13
378	VSADQLSSHRLATDWKSSQR	247	20	dev-adult.embryo.PL	0.00052658	0	False	EBZ_247.1_sets_embryo	0.0	0.0	1.0	0.0	1.0	0.0	0.0	247.1	sense;intronic;	VSADQLSSHRLATDWKSSQRFAIFYSEG	28	-1
379	LATDWKSSQR	247	10	dev-adult.PL	0.19192	0	False	EBZ_247.1_sets_embryo	0.0	0.0	1.0	0.0	1.0	0.0	0.0	247.1	sense;intronic;	VSADQLSSHRLATDWKSSQRFAIFYSEG	28	-1
380	GVSIPMAPR	248	9	embryo	0.37331	0	False	EBZ_248.1_sets_embryo	0.0	1.0	0.0	0.0	0.0	0.0	0.0	248.1	antisense;	GVSIPMAPRFSRGGF	15	5
381	GVSIPMAPRFSR	248	12	embryo	0.0031295000000000003	0	False	EBZ_248.1_sets_embryo	0.0	1.0	0.0	0.0	0.0	0.0	0.0	248.1	antisense;	GVSIPMAPRFSRGGF	15	5
382	GVSIPMAPRFSRGGF	248	15	embryo	0.38915	0	False	EBZ_248.1_sets_embryo	0.0	1.0	0.0	0.0	0.0	0.0	0.0	248.1	antisense;	GVSIPMAPRFSRGGF	15	5
383	IELDIRSRER	249	10	embryo.dev-embryo.PL	0.1001	0	False	EBZ_249.1_sets_embryo	0.0	0.0	1.0	0.0	0.0	0.0	1.0	249.1	sense;threeUTR;	NDKQIKSIKCQTPDPLLARLRRMITKIELDIRSRERIPNDSDATHMRNVFN	51	22
384	MITKIELDIR	249	10	embryo.dev-embryo.PL	0.0015044	0	False	EBZ_249.1_sets_embryo	0.0	0.0	1.0	0.0	0.0	0.0	1.0	249.1	sense;threeUTR;	NDKQIKSIKCQTPDPLLARLRRMITKIELDIRSRERIPNDSDATHMRNVFN	51	22
386	TAKKMEEDNAK	250	11	embryo.PL	0.0021997	0	False	EBZ_250.1_sets_embryo	0.0	0.0	1.0	0.0	0.0	1.0	0.0	250.1	sense;fiveUTR;	TAKKMEEDNAKVLSNNNKNNRNNNKGRQQLQGHAHSSATAHASVDIFIFDL	51	4
387	QLAESLMSLLGLSHMR	252	16	embryo.dev-embryo.dev-adult	0.0072143	0	False	EBZ_252.1_sets_PL.embryo.dev-embryo	1.0	0.0	0.0	0.0	0.0	0.0	0.0	252.1	intergenic;	QLAESLMSLLGLSHMRSRIARIIKRITI	28	6
388	QLAESLMSLLGLSHMRSR	252	18	dev-adult.embryo.dev-embryo.PL	0.02924	0	False	EBZ_252.1_sets_PL.embryo.dev-embryo	1.0	0.0	0.0	0.0	0.0	0.0	0.0	252.1	intergenic;	QLAESLMSLLGLSHMRSRIARIIKRITI	28	6
389	LLGALKGMGMRNILR	255	15	embryo.dev-embryo.dev-adult	0.0046858	0	False	EBZ_255.1_sets_embryo.dev-embryo	0.0	1.0	0.0	0.0	0.0	0.0	0.0	255.1	antisense;	LLGALKGMGMRNILRFLAWAPT	22	7
390	ISIFYTLHSLLTWK	257	14	embryo.PL	0.00015747	0	False	EBZ_257.1_sets_PL.embryo	0.0	0.0	1.0	1.0	0.0	1.0	0.0	257.1	sense;exonic;fiveUTR;	ISIFYTLHSLLTWKKVLFLSTHLSIAGRRRFAALFFSFALTNQMFCFPAQICRIP	55	43
391	KVLFLSTHLSIAGR	257	14	embryo	0.13783	0	False	EBZ_257.1_sets_PL.embryo	0.0	0.0	1.0	1.0	0.0	1.0	0.0	257.1	sense;exonic;fiveUTR;	ISIFYTLHSLLTWKKVLFLSTHLSIAGRRRFAALFFSFALTNQMFCFPAQICRIP	55	43
392	RFAALFFSFALTNQMFCFPAQICR	257	24	embryo	0.20077	0	False	EBZ_257.1_sets_PL.embryo	0.0	0.0	1.0	1.0	0.0	1.0	0.0	257.1	sense;exonic;fiveUTR;	ISIFYTLHSLLTWKKVLFLSTHLSIAGRRRFAALFFSFALTNQMFCFPAQICRIP	55	43
393	ALSIPISFQFRVFMK	266	15	dev-adult.embryo.dev-embryo.PL	0.0069346	0	False	EBZ_266.1_sets_embryo.dev-embryo	1.0	0.0	0.0	0.0	0.0	0.0	0.0	266.1	intergenic;	ALSIPISFQFRVFMKRQMTRLVF	23	13
394	HAHRSQCFALR	272	11	embryo	0.17488	0	False	EBZ_272.1_sets_embryo.dev-embryo	0.0	1.0	0.0	0.0	0.0	0.0	0.0	272.1	antisense;	RMMQLEGTEITYHNPRRHAHRSQCFALRAGCSPLVR	36	1
395	RMMQLEGTEITYHNPR	272	16	embryo.dev-embryo	0.17305	0	False	EBZ_272.1_sets_embryo.dev-embryo	0.0	1.0	0.0	0.0	0.0	0.0	0.0	272.1	antisense;	RMMQLEGTEITYHNPRRHAHRSQCFALRAGCSPLVR	36	1
396	RMMQLEGTEITYHNPRR	272	17	embryo.dev-embryo	0.00081123	0	False	EBZ_272.1_sets_embryo.dev-embryo	0.0	1.0	0.0	0.0	0.0	0.0	0.0	272.1	antisense;	RMMQLEGTEITYHNPRRHAHRSQCFALRAGCSPLVR	36	1
398	HPNPAPAAGSETSKK	273	15	embryo.dev-embryo.dev-adult	1.7227e-06	0	False	EBZ_273.1_sets_embryo.dev-embryo	0.0	0.0	1.0	0.0	1.0	1.0	1.0	273.1	sense;intronic;fiveUTR;threeUTR;	QLKNNVDGGVSDTTSGVISNSNPAAGSASLSSKHPNPAPAAGSETSKKNVDTNVKRIENDGASNSSQSSTKALEQKFL	78	-1
400	NNVDGGVSDTTSGVISNSNPAAGSASLSSK	273	30	embryo.dev-adult	2.8475e-16	0	False	EBZ_273.1_sets_embryo.dev-embryo	0.0	0.0	1.0	0.0	1.0	1.0	1.0	273.1	sense;intronic;fiveUTR;threeUTR;	QLKNNVDGGVSDTTSGVISNSNPAAGSASLSSKHPNPAPAAGSETSKKNVDTNVKRIENDGASNSSQSSTKALEQKFL	78	-1
402	HPNPAPAAGSETSK	273	14	dev-embryo	0.43087	0	False	EBZ_273.1_sets_embryo.dev-embryo	0.0	0.0	1.0	0.0	1.0	1.0	1.0	273.1	sense;intronic;fiveUTR;threeUTR;	QLKNNVDGGVSDTTSGVISNSNPAAGSASLSSKHPNPAPAAGSETSKKNVDTNVKRIENDGASNSSQSSTKALEQKFL	78	-1
403	ENDELLKIQLIQK	275	13	embryo.dev-embryo	7.8096e-05	0	False	EBZ_275.1_sets_embryo	0.0	1.0	0.0	0.0	0.0	0.0	0.0	275.1	antisense;	KHKSRDPFGAQTAGAGLNPWHVFYFQIPQRMGLVLCTYKKENDELLKIQLIQKIPYGFKTTSPT	64	30
404	KENDELLKIQLIQK	275	14	embryo	0.084642	0	False	EBZ_275.1_sets_embryo	0.0	1.0	0.0	0.0	0.0	0.0	0.0	275.1	antisense;	KHKSRDPFGAQTAGAGLNPWHVFYFQIPQRMGLVLCTYKKENDELLKIQLIQKIPYGFKTTSPT	64	30
405	MGLVLCTYKKENDELLK	275	17	embryo.dev-embryo	2.4579	0	False	EBZ_275.1_sets_embryo	0.0	1.0	0.0	0.0	0.0	0.0	0.0	275.1	antisense;	KHKSRDPFGAQTAGAGLNPWHVFYFQIPQRMGLVLCTYKKENDELLKIQLIQKIPYGFKTTSPT	64	30
406	MGLVLCTYK	275	9	dev-embryo	0.42307	0	False	EBZ_275.1_sets_embryo	0.0	1.0	0.0	0.0	0.0	0.0	0.0	275.1	antisense;	KHKSRDPFGAQTAGAGLNPWHVFYFQIPQRMGLVLCTYKKENDELLKIQLIQKIPYGFKTTSPT	64	30
407	INGTMTLDEFEK	276	12	embryo.PL	0.20188	0	False	EBZ_276.1_sets_embryo	0.0	0.0	1.0	0.0	1.0	0.0	0.0	276.1	sense;intronic;	INGTMTLDEFEKSSAKVLDMKTIFKKMLYEVYTYTNNKINNL	42	4
408	SSAKVLDMK	276	9	dev-adult.embryo.PL	0.00094119	0	False	EBZ_276.1_sets_embryo	0.0	0.0	1.0	0.0	1.0	0.0	0.0	276.1	sense;intronic;	INGTMTLDEFEKSSAKVLDMKTIFKKMLYEVYTYTNNKINNL	42	4
409	TIFKKMLYEVYTYTNNK	276	17	dev-adult.embryo.PL	0.14072	0	False	EBZ_276.1_sets_embryo	0.0	0.0	1.0	0.0	1.0	0.0	0.0	276.1	sense;intronic;	INGTMTLDEFEKSSAKVLDMKTIFKKMLYEVYTYTNNKINNL	42	4
410	MLYEVYTYTNNK	276	12	PL	0.12036	0	False	EBZ_276.1_sets_embryo	0.0	0.0	1.0	0.0	1.0	0.0	0.0	276.1	sense;intronic;	INGTMTLDEFEKSSAKVLDMKTIFKKMLYEVYTYTNNKINNL	42	4
411	VLDMKTIFK	276	9	PL	0.85611	0	False	EBZ_276.1_sets_embryo	0.0	0.0	1.0	0.0	1.0	0.0	0.0	276.1	sense;intronic;	INGTMTLDEFEKSSAKVLDMKTIFKKMLYEVYTYTNNKINNL	42	4
412	IVFCKFLLQELK	277	12	PL	0.19888	0	False	EBZ_277.1_sets_embryo	0.0	0.0	2.0	2.0	1.0	0.0	0.0	277.1	sense;exonic;intronic;	IVFCKFLLQELKPQGRENQSLAGCGPMVCSVFLISPSSPLLFLQASHSGKCGCLGRNSLAAELLERLLGHSADGQRIPRLLATAVRAQLPAELPHWRGLCALGLPPGQQSAPLRRHGSGGAGGAHPPGLRVGSPGRRRALRRPPDPHGGGGRSGGTGGPRRLRLLPAHVPQLLAAHEVARVRRSAPVAGPWSHFDPGCSRPTLQGDGYYGASGLCPLRRDARSQRTGGQGN	231	26
413	LLATAVR	277	7	dev-adult.dev-embryo.PL	0.023373	0	False	EBZ_277.1_sets_embryo	0.0	0.0	2.0	2.0	1.0	0.0	0.0	277.1	sense;exonic;intronic;	IVFCKFLLQELKPQGRENQSLAGCGPMVCSVFLISPSSPLLFLQASHSGKCGCLGRNSLAAELLERLLGHSADGQRIPRLLATAVRAQLPAELPHWRGLCALGLPPGQQSAPLRRHGSGGAGGAHPPGLRVGSPGRRRALRRPPDPHGGGGRSGGTGGPRRLRLLPAHVPQLLAAHEVARVRRSAPVAGPWSHFDPGCSRPTLQGDGYYGASGLCPLRRDARSQRTGGQGN	231	26
414	LLGHSADGQR	277	10	dev-embryo.PL	0.13752	0	False	EBZ_277.1_sets_embryo	0.0	0.0	2.0	2.0	1.0	0.0	0.0	277.1	sense;exonic;intronic;	IVFCKFLLQELKPQGRENQSLAGCGPMVCSVFLISPSSPLLFLQASHSGKCGCLGRNSLAAELLERLLGHSADGQRIPRLLATAVRAQLPAELPHWRGLCALGLPPGQQSAPLRRHGSGGAGGAHPPGLRVGSPGRRRALRRPPDPHGGGGRSGGTGGPRRLRLLPAHVPQLLAAHEVARVRRSAPVAGPWSHFDPGCSRPTLQGDGYYGASGLCPLRRDARSQRTGGQGN	231	26
415	NSLAAELLER	277	10	dev-embryo.PL	0.0040207	0	False	EBZ_277.1_sets_embryo	0.0	0.0	2.0	2.0	1.0	0.0	0.0	277.1	sense;exonic;intronic;	IVFCKFLLQELKPQGRENQSLAGCGPMVCSVFLISPSSPLLFLQASHSGKCGCLGRNSLAAELLERLLGHSADGQRIPRLLATAVRAQLPAELPHWRGLCALGLPPGQQSAPLRRHGSGGAGGAHPPGLRVGSPGRRRALRRPPDPHGGGGRSGGTGGPRRLRLLPAHVPQLLAAHEVARVRRSAPVAGPWSHFDPGCSRPTLQGDGYYGASGLCPLRRDARSQRTGGQGN	231	26
416	PTLQGDGYYGASGLCPLR	277	18	PL	0.52622	0	False	EBZ_277.1_sets_embryo	0.0	0.0	2.0	2.0	1.0	0.0	0.0	277.1	sense;exonic;intronic;	IVFCKFLLQELKPQGRENQSLAGCGPMVCSVFLISPSSPLLFLQASHSGKCGCLGRNSLAAELLERLLGHSADGQRIPRLLATAVRAQLPAELPHWRGLCALGLPPGQQSAPLRRHGSGGAGGAHPPGLRVGSPGRRRALRRPPDPHGGGGRSGGTGGPRRLRLLPAHVPQLLAAHEVARVRRSAPVAGPWSHFDPGCSRPTLQGDGYYGASGLCPLRRDARSQRTGGQGN	231	26
417	RHGSGGAGGAHPPGLR	277	16	PL	0.127	0	False	EBZ_277.1_sets_embryo	0.0	0.0	2.0	2.0	1.0	0.0	0.0	277.1	sense;exonic;intronic;	IVFCKFLLQELKPQGRENQSLAGCGPMVCSVFLISPSSPLLFLQASHSGKCGCLGRNSLAAELLERLLGHSADGQRIPRLLATAVRAQLPAELPHWRGLCALGLPPGQQSAPLRRHGSGGAGGAHPPGLRVGSPGRRRALRRPPDPHGGGGRSGGTGGPRRLRLLPAHVPQLLAAHEVARVRRSAPVAGPWSHFDPGCSRPTLQGDGYYGASGLCPLRRDARSQRTGGQGN	231	26
418	VGSPGRR	277	7	dev-adult.dev-embryo.PL	0.24959	0	False	EBZ_277.1_sets_embryo	0.0	0.0	2.0	2.0	1.0	0.0	0.0	277.1	sense;exonic;intronic;	IVFCKFLLQELKPQGRENQSLAGCGPMVCSVFLISPSSPLLFLQASHSGKCGCLGRNSLAAELLERLLGHSADGQRIPRLLATAVRAQLPAELPHWRGLCALGLPPGQQSAPLRRHGSGGAGGAHPPGLRVGSPGRRRALRRPPDPHGGGGRSGGTGGPRRLRLLPAHVPQLLAAHEVARVRRSAPVAGPWSHFDPGCSRPTLQGDGYYGASGLCPLRRDARSQRTGGQGN	231	26
419	FLLQELK	277	7	dev-embryo	0.33194	0	False	EBZ_277.1_sets_embryo	0.0	0.0	2.0	2.0	1.0	0.0	0.0	277.1	sense;exonic;intronic;	IVFCKFLLQELKPQGRENQSLAGCGPMVCSVFLISPSSPLLFLQASHSGKCGCLGRNSLAAELLERLLGHSADGQRIPRLLATAVRAQLPAELPHWRGLCALGLPPGQQSAPLRRHGSGGAGGAHPPGLRVGSPGRRRALRRPPDPHGGGGRSGGTGGPRRLRLLPAHVPQLLAAHEVARVRRSAPVAGPWSHFDPGCSRPTLQGDGYYGASGLCPLRRDARSQRTGGQGN	231	26
420	SGGTGGPR	277	8	dev-embryo	3.4209	0	False	EBZ_277.1_sets_embryo	0.0	0.0	2.0	2.0	1.0	0.0	0.0	277.1	sense;exonic;intronic;	IVFCKFLLQELKPQGRENQSLAGCGPMVCSVFLISPSSPLLFLQASHSGKCGCLGRNSLAAELLERLLGHSADGQRIPRLLATAVRAQLPAELPHWRGLCALGLPPGQQSAPLRRHGSGGAGGAHPPGLRVGSPGRRRALRRPPDPHGGGGRSGGTGGPRRLRLLPAHVPQLLAAHEVARVRRSAPVAGPWSHFDPGCSRPTLQGDGYYGASGLCPLRRDARSQRTGGQGN	231	26
421	TVVGPPK	280	7	embryo	0.39893	0	False	EBZ_280.1_sets_embryo	0.0	0.0	1.0	0.0	1.0	0.0	0.0	280.1	sense;intronic;	TVVGPPKSMGVAKYNLGAGEIRLKEQIINTSQIKSINN	38	8
422	TVVGPPKSMGVAKYNLGAGEIR	280	22	embryo	0.00030936	0	False	EBZ_280.1_sets_embryo	0.0	0.0	1.0	0.0	1.0	0.0	0.0	280.1	sense;intronic;	TVVGPPKSMGVAKYNLGAGEIRLKEQIINTSQIKSINN	38	8
423	IECWLEK	281	7	dev-adult.embryo.PL	0.23058	0	False	EBZ_281.1_sets_embryo	0.0	0.0	1.0	0.0	1.0	0.0	0.0	281.1	sense;intronic;	KGNVTEMFVKIECWLEKQHSQSLSQTDKINTKCTEKNVLT	40	6
424	IECWLEKQHSQSLSQTDKINTK	281	22	embryo	0.40129	0	False	EBZ_281.1_sets_embryo	0.0	0.0	1.0	0.0	1.0	0.0	0.0	281.1	sense;intronic;	KGNVTEMFVKIECWLEKQHSQSLSQTDKINTKCTEKNVLT	40	6
425	INTKCTEK	281	8	embryo	0.31487	0	False	EBZ_281.1_sets_embryo	0.0	0.0	1.0	0.0	1.0	0.0	0.0	281.1	sense;intronic;	KGNVTEMFVKIECWLEKQHSQSLSQTDKINTKCTEKNVLT	40	6
426	KGNVTEMFVK	281	10	dev-adult.embryo.dev-embryo.PL	0.0044774	0	False	EBZ_281.1_sets_embryo	0.0	0.0	1.0	0.0	1.0	0.0	0.0	281.1	sense;intronic;	KGNVTEMFVKIECWLEKQHSQSLSQTDKINTKCTEKNVLT	40	6
427	KGNVTEMFVKIECWLEK	281	17	PL	0.34908	0	False	EBZ_281.1_sets_embryo	0.0	0.0	1.0	0.0	1.0	0.0	0.0	281.1	sense;intronic;	KGNVTEMFVKIECWLEKQHSQSLSQTDKINTKCTEKNVLT	40	6
428	QHSQSLSQTDK	281	11	PL	0.47449	0	False	EBZ_281.1_sets_embryo	0.0	0.0	1.0	0.0	1.0	0.0	0.0	281.1	sense;intronic;	KGNVTEMFVKIECWLEKQHSQSLSQTDKINTKCTEKNVLT	40	6
429	QHSQSLSQTDKINTKCTEK	281	19	PL	3.2396	0	False	EBZ_281.1_sets_embryo	0.0	0.0	1.0	0.0	1.0	0.0	0.0	281.1	sense;intronic;	KGNVTEMFVKIECWLEKQHSQSLSQTDKINTKCTEKNVLT	40	6
430	IECWLEKQHSQSLSQTDK	281	18	dev-adult	0.20446	0	False	EBZ_281.1_sets_embryo	0.0	0.0	1.0	0.0	1.0	0.0	0.0	281.1	sense;intronic;	KGNVTEMFVKIECWLEKQHSQSLSQTDKINTKCTEKNVLT	40	6
431	INTKCTEKNVLT	281	12	dev-embryo	0.32156	0	False	EBZ_281.1_sets_embryo	0.0	0.0	1.0	0.0	1.0	0.0	0.0	281.1	sense;intronic;	KGNVTEMFVKIECWLEKQHSQSLSQTDKINTKCTEKNVLT	40	6
432	NYRPDWVQFE	285	10	embryo	1.0523	0	False	EBZ_285.1_sets_embryo	0.0	0.0	1.0	0.0	1.0	0.0	0.0	285.1	sense;intronic;	FVNLLVCKWKSLTIDPAICMSNWLLNRNYRPDWVQFE	37	19
433	SLTIDPAICMSNWLLNRNYR	285	20	dev-adult.embryo.dev-embryo.PL	0.0016222	0	False	EBZ_285.1_sets_embryo	0.0	0.0	1.0	0.0	1.0	0.0	0.0	285.1	sense;intronic;	FVNLLVCKWKSLTIDPAICMSNWLLNRNYRPDWVQFE	37	19
434	WKSLTIDPAICMSNWLLNRNYR	285	22	dev-embryo	0.38995	0	False	EBZ_285.1_sets_embryo	0.0	0.0	1.0	0.0	1.0	0.0	0.0	285.1	sense;intronic;	FVNLLVCKWKSLTIDPAICMSNWLLNRNYRPDWVQFE	37	19
435	NATNVGTKNVMK	301	12	dev-adult.embryo.PL	0.00093703	0	False	EBZ_301.1_sets_embryo	0.0	1.0	0.0	0.0	0.0	0.0	0.0	301.1	antisense;	SFTSYGASKSCKNATNVGTKNVMKMNTVKYITIMQIFTINFGGHII	46	22
436	NVMKMNTVK	301	9	embryo	1.0176	0	False	EBZ_301.1_sets_embryo	0.0	1.0	0.0	0.0	0.0	0.0	0.0	301.1	antisense;	SFTSYGASKSCKNATNVGTKNVMKMNTVKYITIMQIFTINFGGHII	46	22
437	HCQEEHFA	308	8	embryo	0.48087	0	False	EBZ_308.1_sets_embryo	0.0	0.0	1.0	0.0	0.0	1.0	0.0	308.1	sense;fiveUTR;	LNHYRTHLFSKFSKQLWQAAVINYNNRLKFVAVCCHCCWCCTFHISLATTPATGWPALVGLAQTGYKSNLVPNAEPHSVRHCQEEHFA	88	-1
438	LNHYRTHLFSK	308	11	embryo.dev-embryo	0.00025956	0	False	EBZ_308.1_sets_embryo	0.0	0.0	1.0	0.0	0.0	1.0	0.0	308.1	sense;fiveUTR;	LNHYRTHLFSKFSKQLWQAAVINYNNRLKFVAVCCHCCWCCTFHISLATTPATGWPALVGLAQTGYKSNLVPNAEPHSVRHCQEEHFA	88	-1
439	QLWQAAVINYNNR	308	13	embryo	0.4534	0	False	EBZ_308.1_sets_embryo	0.0	0.0	1.0	0.0	0.0	1.0	0.0	308.1	sense;fiveUTR;	LNHYRTHLFSKFSKQLWQAAVINYNNRLKFVAVCCHCCWCCTFHISLATTPATGWPALVGLAQTGYKSNLVPNAEPHSVRHCQEEHFA	88	-1
440	PKLNVPK	316	7	embryo	0.98783	0	False	EBZ_316.1_sets_embryo	0.0	0.0	1.0	0.0	1.0	0.0	0.0	316.1	sense;intronic;	QGQTQESNVPKTLNMLISFNARRPQKPKLNVPKFVTKHPKKRKKKKQDFKCRWSR	55	14
441	QGQTQESNVPK	316	11	embryo.dev-embryo.dev-adult	0.00026899	0	False	EBZ_316.1_sets_embryo	0.0	0.0	1.0	0.0	1.0	0.0	0.0	316.1	sense;intronic;	QGQTQESNVPKTLNMLISFNARRPQKPKLNVPKFVTKHPKKRKKKKQDFKCRWSR	55	14
442	TLNMLISFNARR	316	12	embryo	0.5148	0	False	EBZ_316.1_sets_embryo	0.0	0.0	1.0	0.0	1.0	0.0	0.0	316.1	sense;intronic;	QGQTQESNVPKTLNMLISFNARRPQKPKLNVPKFVTKHPKKRKKKKQDFKCRWSR	55	14
443	QDFKCRWSR	316	9	dev-embryo	3.3632	0	False	EBZ_316.1_sets_embryo	0.0	0.0	1.0	0.0	1.0	0.0	0.0	316.1	sense;intronic;	QGQTQESNVPKTLNMLISFNARRPQKPKLNVPKFVTKHPKKRKKKKQDFKCRWSR	55	14
444	ASLVPDVARQAWPAR	318	15	dev-adult.embryo.dev-embryo.PL	0.0031002	0	False	EBZ_318.1_sets_embryo	0.0	0.0	1.0	0.0	1.0	0.0	0.0	318.1	sense;intronic;	ASLVPDVARQAWPARRGRVLANQSRLRLVCWSSSSVV	37	-1
445	PLSANYIGR	322	9	dev-adult.embryo.PL	0.00033983	0	False	EBZ_322.1_sets_embryo	0.0	1.0	0.0	0.0	0.0	0.0	0.0	322.1	antisense;	IMRAKGFASLPLLPAIAKESAERPLSANYIGRKSVVNCQTNDWPRC	46	1
446	PLSANYIGRKSVVNCQTNDWPR	322	22	dev-adult	0.39962	0	False	EBZ_322.1_sets_embryo	0.0	1.0	0.0	0.0	0.0	0.0	0.0	322.1	antisense;	IMRAKGFASLPLLPAIAKESAERPLSANYIGRKSVVNCQTNDWPRC	46	1
447	PCTPVSARRAPLR	329	13	embryo.dev-embryo.PL	0.0065422	0	False	EBZ_329.1_sets_embryo	0.0	0.0	1.0	1.0	0.0	0.0	0.0	329.1	sense;exonic;	PCTPVSARRAPLRWPCRRTRSGSACGRPAPICASTTTSTC	40	-1
448	PAPICASTTTSTC	329	13	PL	0.16067	0	False	EBZ_329.1_sets_embryo	0.0	0.0	1.0	1.0	0.0	0.0	0.0	329.1	sense;exonic;	PCTPVSARRAPLRWPCRRTRSGSACGRPAPICASTTTSTC	40	-1
449	ATILACKIWPK	335	11	dev-adult.embryo.dev-embryo.PL	0.00017583	0	False	EBZ_335.1_sets_embryo.dev-embryo	0.0	0.0	1.0	0.0	1.0	0.0	0.0	335.1	sense;intronic;	ATILACKIWPKGIYIFIYFLISQLFDTRKAAAKRSMWQAKEQARPFRAFCHMWKYIYFRCSCTARKCTARCGSSTLL	77	35
450	PFRAFCHMWK	335	10	embryo.PL	0.17046	0	False	EBZ_335.1_sets_embryo.dev-embryo	0.0	0.0	1.0	0.0	1.0	0.0	0.0	335.1	sense;intronic;	ATILACKIWPKGIYIFIYFLISQLFDTRKAAAKRSMWQAKEQARPFRAFCHMWKYIYFRCSCTARKCTARCGSSTLL	77	35
451	RSMWQAK	335	7	embryo	2.029	0	False	EBZ_335.1_sets_embryo.dev-embryo	0.0	0.0	1.0	0.0	1.0	0.0	0.0	335.1	sense;intronic;	ATILACKIWPKGIYIFIYFLISQLFDTRKAAAKRSMWQAKEQARPFRAFCHMWKYIYFRCSCTARKCTARCGSSTLL	77	35
452	YIYFRCSCTAR	335	11	embryo	1.107	0	False	EBZ_335.1_sets_embryo.dev-embryo	0.0	0.0	1.0	0.0	1.0	0.0	0.0	335.1	sense;intronic;	ATILACKIWPKGIYIFIYFLISQLFDTRKAAAKRSMWQAKEQARPFRAFCHMWKYIYFRCSCTARKCTARCGSSTLL	77	35
453	PFRAFCHMWKYIYFR	335	15	PL	0.3723	0	False	EBZ_335.1_sets_embryo.dev-embryo	0.0	0.0	1.0	0.0	1.0	0.0	0.0	335.1	sense;intronic;	ATILACKIWPKGIYIFIYFLISQLFDTRKAAAKRSMWQAKEQARPFRAFCHMWKYIYFRCSCTARKCTARCGSSTLL	77	35
454	YIYFRCSCTARK	335	12	PL	0.30694	0	False	EBZ_335.1_sets_embryo.dev-embryo	0.0	0.0	1.0	0.0	1.0	0.0	0.0	335.1	sense;intronic;	ATILACKIWPKGIYIFIYFLISQLFDTRKAAAKRSMWQAKEQARPFRAFCHMWKYIYFRCSCTARKCTARCGSSTLL	77	35
455	AFCHMWKYIYFR	335	12	dev-adult	0.20753	0	False	EBZ_335.1_sets_embryo.dev-embryo	0.0	0.0	1.0	0.0	1.0	0.0	0.0	335.1	sense;intronic;	ATILACKIWPKGIYIFIYFLISQLFDTRKAAAKRSMWQAKEQARPFRAFCHMWKYIYFRCSCTARKCTARCGSSTLL	77	35
456	ATILACK	335	7	dev-adult	0.4098100000000001	0	False	EBZ_335.1_sets_embryo.dev-embryo	0.0	0.0	1.0	0.0	1.0	0.0	0.0	335.1	sense;intronic;	ATILACKIWPKGIYIFIYFLISQLFDTRKAAAKRSMWQAKEQARPFRAFCHMWKYIYFRCSCTARKCTARCGSSTLL	77	35
457	GIYIFIYFLISQLFDTRKAAAK	335	22	dev-adult.dev-embryo	0.40514	0	False	EBZ_335.1_sets_embryo.dev-embryo	0.0	0.0	1.0	0.0	1.0	0.0	0.0	335.1	sense;intronic;	ATILACKIWPKGIYIFIYFLISQLFDTRKAAAKRSMWQAKEQARPFRAFCHMWKYIYFRCSCTARKCTARCGSSTLL	77	35
458	HHYLNVH	337	7	PL	0.28742	0	False	EBZ_337.1_sets_embryo.dev-embryo	0.0	1.0	0.0	0.0	0.0	0.0	0.0	337.1	antisense;	SNKSLFDQLNMKKHHYLNVH	20	10
459	SLFDQLNMK	337	9	PL	0.073108	0	False	EBZ_337.1_sets_embryo.dev-embryo	0.0	1.0	0.0	0.0	0.0	0.0	0.0	337.1	antisense;	SNKSLFDQLNMKKHHYLNVH	20	10
460	SLFDQLNMKKHHYLNVH	337	17	dev-embryo.PL	0.16113	0	False	EBZ_337.1_sets_embryo.dev-embryo	0.0	1.0	0.0	0.0	0.0	0.0	0.0	337.1	antisense;	SNKSLFDQLNMKKHHYLNVH	20	10
461	SNKSLFDQLNMKK	337	13	dev-embryo.PL	0.0042726000000000005	0	False	EBZ_337.1_sets_embryo.dev-embryo	0.0	1.0	0.0	0.0	0.0	0.0	0.0	337.1	antisense;	SNKSLFDQLNMKKHHYLNVH	20	10
462	KNGIEEFSWR	340	10	embryo.PL	0.13169	0	False	EBZ_340.1_sets_PL.embryo.dev-embryo	1.0	0.0	0.0	0.0	0.0	0.0	0.0	340.1	intergenic;	KSQTFETNLQKYKKKNGIEEFSWRNKNLKLIKVIVLFSLLSSKLFGQLHFCQAKLIFKFIVMRK	64	61
463	KSQTFETNLQK	340	11	dev-adult.embryo.PL	0.040332	0	False	EBZ_340.1_sets_PL.embryo.dev-embryo	1.0	0.0	0.0	0.0	0.0	0.0	0.0	340.1	intergenic;	KSQTFETNLQKYKKKNGIEEFSWRNKNLKLIKVIVLFSLLSSKLFGQLHFCQAKLIFKFIVMRK	64	61
464	LFGQLHFCQAK	340	11	embryo.PL	0.093926	0	False	EBZ_340.1_sets_PL.embryo.dev-embryo	1.0	0.0	0.0	0.0	0.0	0.0	0.0	340.1	intergenic;	KSQTFETNLQKYKKKNGIEEFSWRNKNLKLIKVIVLFSLLSSKLFGQLHFCQAKLIFKFIVMRK	64	61
465	LFGQLHFCQAKLIFK	340	15	embryo.PL	0.18668	0	False	EBZ_340.1_sets_PL.embryo.dev-embryo	1.0	0.0	0.0	0.0	0.0	0.0	0.0	340.1	intergenic;	KSQTFETNLQKYKKKNGIEEFSWRNKNLKLIKVIVLFSLLSSKLFGQLHFCQAKLIFKFIVMRK	64	61
466	NGIEEFSWRNK	340	11	embryo	1.0112	0	False	EBZ_340.1_sets_PL.embryo.dev-embryo	1.0	0.0	0.0	0.0	0.0	0.0	0.0	340.1	intergenic;	KSQTFETNLQKYKKKNGIEEFSWRNKNLKLIKVIVLFSLLSSKLFGQLHFCQAKLIFKFIVMRK	64	61
467	NLKLIKVIVLFSLLSSK	340	17	embryo.dev-embryo.PL	0.0030342	0	False	EBZ_340.1_sets_PL.embryo.dev-embryo	1.0	0.0	0.0	0.0	0.0	0.0	0.0	340.1	intergenic;	KSQTFETNLQKYKKKNGIEEFSWRNKNLKLIKVIVLFSLLSSKLFGQLHFCQAKLIFKFIVMRK	64	61
468	SQTFETNLQK	340	10	embryo.dev-adult	0.12684	0	False	EBZ_340.1_sets_PL.embryo.dev-embryo	1.0	0.0	0.0	0.0	0.0	0.0	0.0	340.1	intergenic;	KSQTFETNLQKYKKKNGIEEFSWRNKNLKLIKVIVLFSLLSSKLFGQLHFCQAKLIFKFIVMRK	64	61
469	SQTFETNLQKYK	340	12	embryo	0.17776	0	False	EBZ_340.1_sets_PL.embryo.dev-embryo	1.0	0.0	0.0	0.0	0.0	0.0	0.0	340.1	intergenic;	KSQTFETNLQKYKKKNGIEEFSWRNKNLKLIKVIVLFSLLSSKLFGQLHFCQAKLIFKFIVMRK	64	61
470	LIFKFIVMRK	340	10	PL	0.21076	0	False	EBZ_340.1_sets_PL.embryo.dev-embryo	1.0	0.0	0.0	0.0	0.0	0.0	0.0	340.1	intergenic;	KSQTFETNLQKYKKKNGIEEFSWRNKNLKLIKVIVLFSLLSSKLFGQLHFCQAKLIFKFIVMRK	64	61
472	ALAFEEVDGFRLMTILEGQR	344	20	embryo	0.99628	0	False	EBZ_344.2_sets_embryo	0.0	1.0	0.0	0.0	0.0	0.0	0.0	344.2	antisense;	TIPSNISWLMMPIRLLGVPLLTFPAVLPLPLPSPLPLPFPLPLPFPPMMLPLWLPALLIPSPLPPSLPPPLPPPTLLPLALAFEEVDGFRLMTILEGQRFGISMRQISNAAN	112	9
475	LMTILEGQR	344	9	dev-adult.embryo.PL	0.0011868	0	False	EBZ_344.2_sets_embryo	0.0	1.0	0.0	0.0	0.0	0.0	0.0	344.2	antisense;	TIPSNISWLMMPIRLLGVPLLTFPAVLPLPLPSPLPLPFPLPLPFPPMMLPLWLPALLIPSPLPPSLPPPLPPPTLLPLALAFEEVDGFRLMTILEGQRFGISMRQISNAAN	112	9
478	QISNAAN	344	7	dev-adult.PL	0.24017	0	False	EBZ_344.2_sets_embryo	0.0	1.0	0.0	0.0	0.0	0.0	0.0	344.2	antisense;	TIPSNISWLMMPIRLLGVPLLTFPAVLPLPLPSPLPLPFPLPLPFPPMMLPLWLPALLIPSPLPPSLPPPLPPPTLLPLALAFEEVDGFRLMTILEGQRFGISMRQISNAAN	112	9
480	CNCLWLSNSWALWNCMLQMLQ	348	21	embryo	0.25547	0	False	EBZ_348.1_sets_embryo	0.0	1.0	0.0	0.0	0.0	0.0	0.0	348.1	antisense;	LAFSRKLAVHNSQLNLISVTPPKCNCLWLSNSWALWNCMLQMLQ	44	38
481	LAVHNSQLNLISVTPPK	348	17	embryo	0.0004377	0	False	EBZ_348.1_sets_embryo	0.0	1.0	0.0	0.0	0.0	0.0	0.0	348.1	antisense;	LAFSRKLAVHNSQLNLISVTPPKCNCLWLSNSWALWNCMLQMLQ	44	38
482	LQECMIIVDLKYSAFLSRLWC	350	21	embryo.dev-embryo	0.011584	0	False	EBZ_350.1_sets_embryo	1.0	0.0	0.0	0.0	0.0	0.0	0.0	350.1	intergenic;	LQECMIIVDLKYSAFLSRLWC	21	4
483	LQECMIIVDLK	350	11	dev-embryo	0.12012	0	False	EBZ_350.1_sets_embryo	1.0	0.0	0.0	0.0	0.0	0.0	0.0	350.1	intergenic;	LQECMIIVDLKYSAFLSRLWC	21	4
484	HLEMSGMENVSCHRLEEHK	351	19	embryo	0.14585	0	False	EBZ_351.1_sets_embryo.dev-embryo	0.0	1.0	0.0	0.0	0.0	0.0	0.0	351.1	antisense;	RRHLEMSGMENVSCHRLEEHKIVTKVVNSISSFENN	36	5
485	RRHLEMSGMENVSCHR	351	16	embryo.dev-embryo	0.0020291	0	False	EBZ_351.1_sets_embryo.dev-embryo	0.0	1.0	0.0	0.0	0.0	0.0	0.0	351.1	antisense;	RRHLEMSGMENVSCHRLEEHKIVTKVVNSISSFENN	36	5
486	VVNSISSFENN	351	11	embryo.dev-adult	0.1427	0	False	EBZ_351.1_sets_embryo.dev-embryo	0.0	1.0	0.0	0.0	0.0	0.0	0.0	351.1	antisense;	RRHLEMSGMENVSCHRLEEHKIVTKVVNSISSFENN	36	5
487	GSGDKGMTIVVVELMTAPVWMS	360	22	embryo	0.0010743	0	False	EBZ_360.1_sets_embryo	0.0	1.0	0.0	0.0	0.0	0.0	0.0	360.1	antisense;	GSGDKGMTIVVVELMTAPVWMS	22	6
488	INFSTSDMIFKK	365	12	embryo	0.018692	0	False	EBZ_365.1_sets_embryo	1.0	0.0	0.0	0.0	0.0	0.0	0.0	365.1	intergenic;	FRINFSTSDMIFKKPQIT	18	9
489	INFSTSDMIFKKPQIT	365	16	embryo	0.13748	0	False	EBZ_365.1_sets_embryo	1.0	0.0	0.0	0.0	0.0	0.0	0.0	365.1	intergenic;	FRINFSTSDMIFKKPQIT	18	9
490	DGHRVREFSGVAQDDQLPAGSHTFQAL	368	27	embryo	0.0090939	0	False	EBZ_368.1_sets_embryo	0.0	0.0	1.0	1.0	1.0	0.0	0.0	368.1	sense;exonic;intronic;	DGHRVREFSGVAQDDQLPAGSHTFQAL	27	-1
491	ASFLMNFIVGPD	380	12	embryo.dev-embryo	0.0020039000000000003	0	False	EBZ_380.1_sets_embryo	0.0	1.0	0.0	0.0	0.0	0.0	0.0	380.1	antisense;	TFKYLSSLAVCEACKLKFKGRASFLMNFIVGPD	33	25
492	YLSSLAVCEACK	380	12	embryo	0.45032	0	False	EBZ_380.1_sets_embryo	0.0	1.0	0.0	0.0	0.0	0.0	0.0	380.1	antisense;	TFKYLSSLAVCEACKLKFKGRASFLMNFIVGPD	33	25
493	LTLLRMCRR	385	9	embryo.PL	0.0054594	0	False	EBZ_385.1_sets_embryo	0.0	0.0	1.0	0.0	1.0	0.0	0.0	385.1	sense;intronic;	LTLLRMCRRITLSKKGSELAP	21	5
494	GAADHIVAR	386	9	embryo	0.0016695	0	False	EBZ_386.2_sets_embryo	0.0	1.0	0.0	0.0	0.0	0.0	0.0	386.2	antisense;	GAADHIVARRCGMGNQPGIHGLTCGFPVGNRR	32	12
496	GAADHIVARR	386	10	embryo	0.19144	0	False	EBZ_386.2_sets_embryo	0.0	1.0	0.0	0.0	0.0	0.0	0.0	386.2	antisense;	GAADHIVARRCGMGNQPGIHGLTCGFPVGNRR	32	12
498	CGMGNQPGIHGLTCGFPVGNR	386	21	PL	0.16828	0	False	EBZ_386.2_sets_embryo	0.0	1.0	0.0	0.0	0.0	0.0	0.0	386.2	antisense;	GAADHIVARRCGMGNQPGIHGLTCGFPVGNRR	32	12
500	CGMGNQPGIHGLTCGFPVGNRR	386	22	PL	0.14499	0	False	EBZ_386.2_sets_embryo	0.0	1.0	0.0	0.0	0.0	0.0	0.0	386.2	antisense;	GAADHIVARRCGMGNQPGIHGLTCGFPVGNRR	32	12
502	DTQKCVSKLR	388	10	embryo	0.20625	0	False	EBZ_388.1_sets_embryo	0.0	1.0	0.0	0.0	0.0	0.0	0.0	388.1	antisense;	RSVMSIYAKVIKDTQKCVSKLRNVSPGLETCQYFNVLLRLLLCLL	45	3
503	LRNVSPGLETCQYFNVLLRLLLCLL	388	25	embryo	0.17687	0	False	EBZ_388.1_sets_embryo	0.0	1.0	0.0	0.0	0.0	0.0	0.0	388.1	antisense;	RSVMSIYAKVIKDTQKCVSKLRNVSPGLETCQYFNVLLRLLLCLL	45	3
504	NVSPGLETCQYFNVLLR	388	17	embryo	0.12177	0	False	EBZ_388.1_sets_embryo	0.0	1.0	0.0	0.0	0.0	0.0	0.0	388.1	antisense;	RSVMSIYAKVIKDTQKCVSKLRNVSPGLETCQYFNVLLRLLLCLL	45	3
505	SVMSIYAK	388	8	embryo	0.2256	0	False	EBZ_388.1_sets_embryo	0.0	1.0	0.0	0.0	0.0	0.0	0.0	388.1	antisense;	RSVMSIYAKVIKDTQKCVSKLRNVSPGLETCQYFNVLLRLLLCLL	45	3
506	VIKDTQKCVSK	388	11	embryo.dev-embryo	0.0037763000000000007	0	False	EBZ_388.1_sets_embryo	0.0	1.0	0.0	0.0	0.0	0.0	0.0	388.1	antisense;	RSVMSIYAKVIKDTQKCVSKLRNVSPGLETCQYFNVLLRLLLCLL	45	3
507	KNEVSCPETTRMR	395	13	embryo	0.00061879	0	False	EBZ_395.1_sets_embryo	0.0	0.0	1.0	1.0	1.0	0.0	0.0	395.1	sense;exonic;intronic;	KNEVSCPETTRMRQESSTAWMP	22	11
508	NEVSCPETTR	395	10	embryo	0.40668	0	False	EBZ_395.1_sets_embryo	0.0	0.0	1.0	1.0	1.0	0.0	0.0	395.1	sense;exonic;intronic;	KNEVSCPETTRMRQESSTAWMP	22	11
509	KDISPNLSDFAK	396	12	dev-adult.embryo.dev-embryo.PL	0.00028371	0	False	EBZ_396.1_sets_PL.embryo.dev-adult.dev-embryo	0.0	1.0	0.0	0.0	0.0	0.0	0.0	396.1	antisense;	SEWKSVNGCDGTFDTTSCRKDISPNLSDFAKCNFVKKIL	39	-1
510	SVNGCDGTFDTTSCRK	396	16	PL	0.15118	0	False	EBZ_396.1_sets_PL.embryo.dev-adult.dev-embryo	0.0	1.0	0.0	0.0	0.0	0.0	0.0	396.1	antisense;	SEWKSVNGCDGTFDTTSCRKDISPNLSDFAKCNFVKKIL	39	-1
511	EWWRANLAVMKK	400	12	embryo	0.046362	0	False	EBZ_400.1_sets_embryo	0.0	0.0	1.0	0.0	1.0	0.0	0.0	400.1	sense;intronic;	VVYTAPGWMDIRIFVWRCREWWRANLAVMKKNAGCLYP	38	8
512	IFVWRCR	400	7	embryo.dev-embryo.dev-adult	0.89266	0	False	EBZ_400.1_sets_embryo	0.0	0.0	1.0	0.0	1.0	0.0	0.0	400.1	sense;intronic;	VVYTAPGWMDIRIFVWRCREWWRANLAVMKKNAGCLYP	38	8
513	VVYTAPGWMDIR	400	12	dev-adult.embryo.dev-embryo.PL	0.00074868	0	False	EBZ_400.1_sets_embryo	0.0	0.0	1.0	0.0	1.0	0.0	0.0	400.1	sense;intronic;	VVYTAPGWMDIRIFVWRCREWWRANLAVMKKNAGCLYP	38	8
514	IFVWRCREWWR	400	11	dev-embryo.PL	0.26322	0	False	EBZ_400.1_sets_embryo	0.0	0.0	1.0	0.0	1.0	0.0	0.0	400.1	sense;intronic;	VVYTAPGWMDIRIFVWRCREWWRANLAVMKKNAGCLYP	38	8
515	VVYTAPGWMDIRIFVWRCR	400	19	PL	0.38939	0	False	EBZ_400.1_sets_embryo	0.0	0.0	1.0	0.0	1.0	0.0	0.0	400.1	sense;intronic;	VVYTAPGWMDIRIFVWRCREWWRANLAVMKKNAGCLYP	38	8
516	NDSFVNLAGSVSQPSSCK	403	18	embryo	0.15680999999999998	0	False	EBZ_403.1_sets_embryo	0.0	1.0	0.0	0.0	0.0	0.0	0.0	403.1	antisense;	NDSFVNLAGSVSQPSSCKRLAA	22	-1
517	NDSFVNLAGSVSQPSSCKRLAA	403	22	embryo.dev-embryo	0.00012884	0	False	EBZ_403.1_sets_embryo	0.0	1.0	0.0	0.0	0.0	0.0	0.0	403.1	antisense;	NDSFVNLAGSVSQPSSCKRLAA	22	-1
518	FALSQIAHWTQCTLAKR	408	17	embryo	0.0079597	0	False	EBZ_408.1_sets_embryo	0.0	0.0	1.0	0.0	1.0	0.0	0.0	408.1	sense;intronic;	FALSQIAHWTQCTLAKRFVVKSFMV	25	23
519	KCPENDSAYYIK	412	12	embryo	0.00071228	0	False	EBZ_412.1_sets_embryo	0.0	1.0	0.0	0.0	0.0	0.0	0.0	412.1	antisense;	KCPENDSAYYIKLLQMTSSRNGLLV	25	15
520	LLQMTSSR	412	8	embryo.dev-embryo	0.11732	0	False	EBZ_412.1_sets_embryo	0.0	1.0	0.0	0.0	0.0	0.0	0.0	412.1	antisense;	KCPENDSAYYIKLLQMTSSRNGLLV	25	15
521	CVGQWTANQVANWESGK	417	17	dev-adult.embryo.dev-embryo.PL	0.00073967	0	False	EBZ_417.1_sets_PL.embryo	1.0	0.0	0.0	0.0	0.0	0.0	0.0	417.1	intergenic;	CVGQWTANQVANWESGKFVFFFCIFIMVIECFERQPIVDSRF	42	26
522	FVFFFCIFIMVIECFERQPIVDSR	417	24	embryo	0.21204	0	False	EBZ_417.1_sets_PL.embryo	1.0	0.0	0.0	0.0	0.0	0.0	0.0	417.1	intergenic;	CVGQWTANQVANWESGKFVFFFCIFIMVIECFERQPIVDSRF	42	26
523	FVFFFCIFIMVIECFER	417	17	PL	0.12924000000000002	0	False	EBZ_417.1_sets_PL.embryo	1.0	0.0	0.0	0.0	0.0	0.0	0.0	417.1	intergenic;	CVGQWTANQVANWESGKFVFFFCIFIMVIECFERQPIVDSRF	42	26
524	IEYAFCVRACACVR	419	14	embryo.dev-embryo	0.20006	0	False	EBZ_419.1_sets_embryo	0.0	1.0	0.0	0.0	0.0	0.0	0.0	419.1	antisense;	NTGYVHKCWVRLSVRIEYAFCVRACACVRLTVLDWCIFISCFL	43	-1
525	LSVRIEYAFCVR	419	12	embryo	0.17652	0	False	EBZ_419.1_sets_embryo	0.0	1.0	0.0	0.0	0.0	0.0	0.0	419.1	antisense;	NTGYVHKCWVRLSVRIEYAFCVRACACVRLTVLDWCIFISCFL	43	-1
526	LSVRIEYAFCVRACACVR	419	18	embryo	0.39062	0	False	EBZ_419.1_sets_embryo	0.0	1.0	0.0	0.0	0.0	0.0	0.0	419.1	antisense;	NTGYVHKCWVRLSVRIEYAFCVRACACVRLTVLDWCIFISCFL	43	-1
527	LTVLDWCIFISCFL	419	14	embryo.dev-embryo	0.0011461	0	False	EBZ_419.1_sets_embryo	0.0	1.0	0.0	0.0	0.0	0.0	0.0	419.1	antisense;	NTGYVHKCWVRLSVRIEYAFCVRACACVRLTVLDWCIFISCFL	43	-1
528	NTGYVHK	419	7	embryo	2.3184	0	False	EBZ_419.1_sets_embryo	0.0	1.0	0.0	0.0	0.0	0.0	0.0	419.1	antisense;	NTGYVHKCWVRLSVRIEYAFCVRACACVRLTVLDWCIFISCFL	43	-1
529	SPMLKMLESRWMLSTTPSMNL	420	21	dev-adult.embryo.PL	0.010992	0	False	EBZ_420.1_sets_embryo	1.0	0.0	0.0	0.0	0.0	0.0	0.0	420.1	intergenic;	SPMLKMLESRWMLSTTPSMNL	21	2
530	NLFTLHSMRMFWFR	428	14	embryo	0.0030216	0	False	EBZ_428.1_sets_embryo	0.0	1.0	0.0	0.0	0.0	0.0	0.0	428.1	antisense;	VGGFWVILGWEESAARNLFTLHSMRMFWFRINGRGFLGVLPPFRGRSTPPVWAE	54	23
531	MFWFRINGR	428	9	dev-adult	0.062572	0	False	EBZ_428.1_sets_embryo	0.0	1.0	0.0	0.0	0.0	0.0	0.0	428.1	antisense;	VGGFWVILGWEESAARNLFTLHSMRMFWFRINGRGFLGVLPPFRGRSTPPVWAE	54	23
532	VGGFWVILGWEESAARNLFTLHSMRMFWFR	428	30	dev-adult	0.20848000000000005	0	False	EBZ_428.1_sets_embryo	0.0	1.0	0.0	0.0	0.0	0.0	0.0	428.1	antisense;	VGGFWVILGWEESAARNLFTLHSMRMFWFRINGRGFLGVLPPFRGRSTPPVWAE	54	23
533	INGRGFLGVLPPFRGR	428	16	dev-embryo	0.1454	0	False	EBZ_428.1_sets_embryo	0.0	1.0	0.0	0.0	0.0	0.0	0.0	428.1	antisense;	VGGFWVILGWEESAARNLFTLHSMRMFWFRINGRGFLGVLPPFRGRSTPPVWAE	54	23
534	ADASLALGIWHNIEVIGVFCSTIFLAGR	434	28	embryo	0.0038511	0	False	EBZ_434.1_sets_embryo	1.0	0.0	0.0	0.0	0.0	0.0	0.0	434.1	intergenic;	ADASLALGIWHNIEVIGVFCSTIFLAGRRRYHLSATLPLPQSTSQSAGYTRISPIKSPFALHLNFSGIVFIVFVVMAMSTPLYTLHKSPKTRSNSADNLMIRWRVIAPDTQAKMEFI	117	75
535	AENKSRVGWLNANANQGAHQFIK	438	23	embryo	0.41845	0	False	EBZ_438.1_sets_embryo.dev-embryo	0.0	0.0	1.0	0.0	0.0	0.0	1.0	438.1	sense;threeUTR;	KCFYKSELQERAENKSRVGWLNANANQGAHQFIKTIIYINSIYQIVKRTKQATYTNYFSLLARHAKSLNRIISNNLETTENRKTHENLSLGPWNRAMHNFLYLKKPFQNTTYIYFSNYIEYFR	123	96
536	CFYKSELQER	438	10	embryo.dev-adult	0.1889	0	False	EBZ_438.1_sets_embryo.dev-embryo	0.0	0.0	1.0	0.0	0.0	0.0	1.0	438.1	sense;threeUTR;	KCFYKSELQERAENKSRVGWLNANANQGAHQFIKTIIYINSIYQIVKRTKQATYTNYFSLLARHAKSLNRIISNNLETTENRKTHENLSLGPWNRAMHNFLYLKKPFQNTTYIYFSNYIEYFR	123	96
537	IISNNLETTENRK	438	13	embryo.dev-adult	0.0018846	0	False	EBZ_438.1_sets_embryo.dev-embryo	0.0	0.0	1.0	0.0	0.0	0.0	1.0	438.1	sense;threeUTR;	KCFYKSELQERAENKSRVGWLNANANQGAHQFIKTIIYINSIYQIVKRTKQATYTNYFSLLARHAKSLNRIISNNLETTENRKTHENLSLGPWNRAMHNFLYLKKPFQNTTYIYFSNYIEYFR	123	96
538	KPFQNTTYIYFSNYIEYFR	438	19	embryo	0.16005999999999998	0	False	EBZ_438.1_sets_embryo.dev-embryo	0.0	0.0	1.0	0.0	0.0	0.0	1.0	438.1	sense;threeUTR;	KCFYKSELQERAENKSRVGWLNANANQGAHQFIKTIIYINSIYQIVKRTKQATYTNYFSLLARHAKSLNRIISNNLETTENRKTHENLSLGPWNRAMHNFLYLKKPFQNTTYIYFSNYIEYFR	123	96
539	QATYTNYFSLLAR	438	13	embryo	0.24585	0	False	EBZ_438.1_sets_embryo.dev-embryo	0.0	0.0	1.0	0.0	0.0	0.0	1.0	438.1	sense;threeUTR;	KCFYKSELQERAENKSRVGWLNANANQGAHQFIKTIIYINSIYQIVKRTKQATYTNYFSLLARHAKSLNRIISNNLETTENRKTHENLSLGPWNRAMHNFLYLKKPFQNTTYIYFSNYIEYFR	123	96
540	SLNRIISNNLETTENRK	438	17	embryo	0.1605	0	False	EBZ_438.1_sets_embryo.dev-embryo	0.0	0.0	1.0	0.0	0.0	0.0	1.0	438.1	sense;threeUTR;	KCFYKSELQERAENKSRVGWLNANANQGAHQFIKTIIYINSIYQIVKRTKQATYTNYFSLLARHAKSLNRIISNNLETTENRKTHENLSLGPWNRAMHNFLYLKKPFQNTTYIYFSNYIEYFR	123	96
541	THENLSLGPWNR	438	12	embryo.dev-adult	0.17448	0	False	EBZ_438.1_sets_embryo.dev-embryo	0.0	0.0	1.0	0.0	0.0	0.0	1.0	438.1	sense;threeUTR;	KCFYKSELQERAENKSRVGWLNANANQGAHQFIKTIIYINSIYQIVKRTKQATYTNYFSLLARHAKSLNRIISNNLETTENRKTHENLSLGPWNRAMHNFLYLKKPFQNTTYIYFSNYIEYFR	123	96
542	AMHNFLYLKKPFQNTTYIYFSNYIEYFR	438	28	dev-adult	0.16298	0	False	EBZ_438.1_sets_embryo.dev-embryo	0.0	0.0	1.0	0.0	0.0	0.0	1.0	438.1	sense;threeUTR;	KCFYKSELQERAENKSRVGWLNANANQGAHQFIKTIIYINSIYQIVKRTKQATYTNYFSLLARHAKSLNRIISNNLETTENRKTHENLSLGPWNRAMHNFLYLKKPFQNTTYIYFSNYIEYFR	123	96
543	TIIYINSIYQIVK	438	13	dev-adult	0.18157	0	False	EBZ_438.1_sets_embryo.dev-embryo	0.0	0.0	1.0	0.0	0.0	0.0	1.0	438.1	sense;threeUTR;	KCFYKSELQERAENKSRVGWLNANANQGAHQFIKTIIYINSIYQIVKRTKQATYTNYFSLLARHAKSLNRIISNNLETTENRKTHENLSLGPWNRAMHNFLYLKKPFQNTTYIYFSNYIEYFR	123	96
544	VGWLNANANQGAHQFIKTIIYINSIYQIVK	438	30	dev-adult	0.17159000000000002	0	False	EBZ_438.1_sets_embryo.dev-embryo	0.0	0.0	1.0	0.0	0.0	0.0	1.0	438.1	sense;threeUTR;	KCFYKSELQERAENKSRVGWLNANANQGAHQFIKTIIYINSIYQIVKRTKQATYTNYFSLLARHAKSLNRIISNNLETTENRKTHENLSLGPWNRAMHNFLYLKKPFQNTTYIYFSNYIEYFR	123	96
545	VLHSPTFVQCDK	440	12	dev-adult.embryo.PL	0.001932	0	False	EBZ_440.1_sets_embryo	1.0	0.0	0.0	0.0	0.0	0.0	0.0	440.1	intergenic;	NPRRGNTCPMQDKNTADIRMLQRVLHSPTFVQCDKSFERASLKYPSDIEILY	52	9
546	GNTCPMQDKNTADIRMLQR	440	19	PL	0.13352999999999998	0	False	EBZ_440.1_sets_embryo	1.0	0.0	0.0	0.0	0.0	0.0	0.0	440.1	intergenic;	NPRRGNTCPMQDKNTADIRMLQRVLHSPTFVQCDKSFERASLKYPSDIEILY	52	9
547	MLQRVLHSPTFVQCDKSFER	440	20	PL	0.3605	0	False	EBZ_440.1_sets_embryo	1.0	0.0	0.0	0.0	0.0	0.0	0.0	440.1	intergenic;	NPRRGNTCPMQDKNTADIRMLQRVLHSPTFVQCDKSFERASLKYPSDIEILY	52	9
548	NPRRGNTCPMQDK	440	13	PL	0.36056	0	False	EBZ_440.1_sets_embryo	1.0	0.0	0.0	0.0	0.0	0.0	0.0	440.1	intergenic;	NPRRGNTCPMQDKNTADIRMLQRVLHSPTFVQCDKSFERASLKYPSDIEILY	52	9
549	SFERASLKYPSDIEILY	440	17	PL	0.37113	0	False	EBZ_440.1_sets_embryo	1.0	0.0	0.0	0.0	0.0	0.0	0.0	440.1	intergenic;	NPRRGNTCPMQDKNTADIRMLQRVLHSPTFVQCDKSFERASLKYPSDIEILY	52	9
550	VLHSPTFVQCDKSFER	440	16	dev-adult	0.20287	0	False	EBZ_440.1_sets_embryo	1.0	0.0	0.0	0.0	0.0	0.0	0.0	440.1	intergenic;	NPRRGNTCPMQDKNTADIRMLQRVLHSPTFVQCDKSFERASLKYPSDIEILY	52	9
551	DFNIISNDIR	444	10	embryo.dev-adult	0.20152	0	False	EBZ_444.1_sets_embryo	1.0	0.0	0.0	0.0	0.0	0.0	0.0	444.1	intergenic;	ISTWGLLQLPPRSSVVHQLFGQGCPASLRRAYLKISQHPVHRSQIKIEQHTQSSFRLLPHKLISENNKDFNIISNDIRSNAAPNLAESSHFAELHIWAVRITIT	104	-1
552	IEQHTQSSFR	444	10	embryo.dev-adult	0.0042415	0	False	EBZ_444.1_sets_embryo	1.0	0.0	0.0	0.0	0.0	0.0	0.0	444.1	intergenic;	ISTWGLLQLPPRSSVVHQLFGQGCPASLRRAYLKISQHPVHRSQIKIEQHTQSSFRLLPHKLISENNKDFNIISNDIRSNAAPNLAESSHFAELHIWAVRITIT	104	-1
553	ISQHPVHR	444	8	embryo.dev-adult	0.090612	0	False	EBZ_444.1_sets_embryo	1.0	0.0	0.0	0.0	0.0	0.0	0.0	444.1	intergenic;	ISTWGLLQLPPRSSVVHQLFGQGCPASLRRAYLKISQHPVHRSQIKIEQHTQSSFRLLPHKLISENNKDFNIISNDIRSNAAPNLAESSHFAELHIWAVRITIT	104	-1
554	ISQHPVHRSQIK	444	12	embryo	0.16549	0	False	EBZ_444.1_sets_embryo	1.0	0.0	0.0	0.0	0.0	0.0	0.0	444.1	intergenic;	ISTWGLLQLPPRSSVVHQLFGQGCPASLRRAYLKISQHPVHRSQIKIEQHTQSSFRLLPHKLISENNKDFNIISNDIRSNAAPNLAESSHFAELHIWAVRITIT	104	-1
555	LISENNK	444	7	embryo	0.057330999999999986	0	False	EBZ_444.1_sets_embryo	1.0	0.0	0.0	0.0	0.0	0.0	0.0	444.1	intergenic;	ISTWGLLQLPPRSSVVHQLFGQGCPASLRRAYLKISQHPVHRSQIKIEQHTQSSFRLLPHKLISENNKDFNIISNDIRSNAAPNLAESSHFAELHIWAVRITIT	104	-1
556	ILIFHMK	446	7	embryo	0.22576	0	False	EBZ_446.1_sets_embryo.dev-embryo	0.0	1.0	0.0	0.0	0.0	0.0	0.0	446.1	antisense;	SEAYFCSPGKKKTCPEMTKGNFALQNSRQISAGRRAKAKRSQSKILIFHMKACKNHK	57	16
557	ILIFHMKACK	446	10	embryo.dev-embryo.PL	0.23384	0	False	EBZ_446.1_sets_embryo.dev-embryo	0.0	1.0	0.0	0.0	0.0	0.0	0.0	446.1	antisense;	SEAYFCSPGKKKTCPEMTKGNFALQNSRQISAGRRAKAKRSQSKILIFHMKACKNHK	57	16
558	ILIFHMKACKNHK	446	13	embryo	0.38498	0	False	EBZ_446.1_sets_embryo.dev-embryo	0.0	1.0	0.0	0.0	0.0	0.0	0.0	446.1	antisense;	SEAYFCSPGKKKTCPEMTKGNFALQNSRQISAGRRAKAKRSQSKILIFHMKACKNHK	57	16
559	KKTCPEMTK	446	9	embryo	0.36511	0	False	EBZ_446.1_sets_embryo.dev-embryo	0.0	1.0	0.0	0.0	0.0	0.0	0.0	446.1	antisense;	SEAYFCSPGKKKTCPEMTKGNFALQNSRQISAGRRAKAKRSQSKILIFHMKACKNHK	57	16
560	KTCPEMTK	446	8	embryo	0.53252	0	False	EBZ_446.1_sets_embryo.dev-embryo	0.0	1.0	0.0	0.0	0.0	0.0	0.0	446.1	antisense;	SEAYFCSPGKKKTCPEMTKGNFALQNSRQISAGRRAKAKRSQSKILIFHMKACKNHK	57	16
561	SEAYFCSPGK	446	10	embryo.PL	0.0095714	0	False	EBZ_446.1_sets_embryo.dev-embryo	0.0	1.0	0.0	0.0	0.0	0.0	0.0	446.1	antisense;	SEAYFCSPGKKKTCPEMTKGNFALQNSRQISAGRRAKAKRSQSKILIFHMKACKNHK	57	16
562	SEAYFCSPGKK	446	11	embryo.dev-embryo	0.0012766	0	False	EBZ_446.1_sets_embryo.dev-embryo	0.0	1.0	0.0	0.0	0.0	0.0	0.0	446.1	antisense;	SEAYFCSPGKKKTCPEMTKGNFALQNSRQISAGRRAKAKRSQSKILIFHMKACKNHK	57	16
563	GNFALQNSRQISAGR	446	15	PL	0.18133	0	False	EBZ_446.1_sets_embryo.dev-embryo	0.0	1.0	0.0	0.0	0.0	0.0	0.0	446.1	antisense;	SEAYFCSPGKKKTCPEMTKGNFALQNSRQISAGRRAKAKRSQSKILIFHMKACKNHK	57	16
564	AICQFVLAHTASITANYRIAMGI	447	23	embryo.dev-embryo.dev-adult	0.0042473	0	False	EBZ_447.1_sets_embryo.dev-adult	0.0	0.0	1.0	0.0	1.0	0.0	0.0	447.1	sense;intronic;	MPARAICQFVLAHTASITANYRIAMGI	27	0
565	FYYYYVYLFK	450	10	embryo	0.0045977	0	False	EBZ_450.1_sets_embryo	0.0	1.0	0.0	0.0	0.0	0.0	0.0	450.1	antisense;	QISLYLPKINLIYKFYYYYVYLFKP	25	-1
566	QISLYLPK	450	8	embryo	0.21972	0	False	EBZ_450.1_sets_embryo	0.0	1.0	0.0	0.0	0.0	0.0	0.0	450.1	antisense;	QISLYLPKINLIYKFYYYYVYLFKP	25	-1
567	NILVNFR	452	7	embryo	0.15905999999999998	0	False	EBZ_452.1_sets_embryo	0.0	0.0	1.0	1.0	1.0	0.0	0.0	452.1	sense;exonic;intronic;	NILVNFRNNPPSLMSST	17	13
568	NILVNFRNNPPSLMSST	452	17	embryo	0.0032666	0	False	EBZ_452.1_sets_embryo	0.0	0.0	1.0	1.0	1.0	0.0	0.0	452.1	sense;exonic;intronic;	NILVNFRNNPPSLMSST	17	13
569	INDGTAASEWR	453	11	embryo	0.14285	0	False	EBZ_453.1_sets_embryo	0.0	1.0	0.0	0.0	0.0	0.0	0.0	453.1	antisense;	INDGTAASEWRMEIENA	17	11
570	INDGTAASEWRMEIENA	453	17	embryo	0.003983400000000001	0	False	EBZ_453.1_sets_embryo	0.0	1.0	0.0	0.0	0.0	0.0	0.0	453.1	antisense;	INDGTAASEWRMEIENA	17	11
571	MQGSPSLIFFLYACLGR	456	17	embryo	0.00015806	0	False	EBZ_456.1_sets_embryo	0.0	0.0	1.0	0.0	1.0	0.0	0.0	456.1	sense;intronic;	IYIYACVVSRQCDLCWKMQGSPSLIFFLYACLGRCNRQMKKKKTEKSMFKYKNLCVSNLSWLK	63	17
572	NLCVSNLSWLK	456	11	embryo	0.12494	0	False	EBZ_456.1_sets_embryo	0.0	0.0	1.0	0.0	1.0	0.0	0.0	456.1	sense;intronic;	IYIYACVVSRQCDLCWKMQGSPSLIFFLYACLGRCNRQMKKKKTEKSMFKYKNLCVSNLSWLK	63	17
573	ALDSNINPTLTPFNPYLNQVKLHPPVNR	464	28	embryo	0.1482	0	False	EBZ_464.1_sets_embryo	0.0	0.0	1.0	0.0	1.0	0.0	0.0	464.1	sense;intronic;	SPLSGLCVRVLQNGLPNATKRALDSNINPTLTPFNPYLNQVKLHPPVNRAVGTFSPADNSTWLSSAQLGAIAECQPAQNCSRLDVKIHTILAGHKKM	97	96
574	LDVKIHTILAGHK	464	13	embryo	1.0761	0	False	EBZ_464.1_sets_embryo	0.0	0.0	1.0	0.0	1.0	0.0	0.0	464.1	sense;intronic;	SPLSGLCVRVLQNGLPNATKRALDSNINPTLTPFNPYLNQVKLHPPVNRAVGTFSPADNSTWLSSAQLGAIAECQPAQNCSRLDVKIHTILAGHKKM	97	96
575	SPLSGLCVR	464	9	embryo	0.0011847	0	False	EBZ_464.1_sets_embryo	0.0	0.0	1.0	0.0	1.0	0.0	0.0	464.1	sense;intronic;	SPLSGLCVRVLQNGLPNATKRALDSNINPTLTPFNPYLNQVKLHPPVNRAVGTFSPADNSTWLSSAQLGAIAECQPAQNCSRLDVKIHTILAGHKKM	97	96
576	VLQNGLPNATK	464	11	embryo	0.41057	0	False	EBZ_464.1_sets_embryo	0.0	0.0	1.0	0.0	1.0	0.0	0.0	464.1	sense;intronic;	SPLSGLCVRVLQNGLPNATKRALDSNINPTLTPFNPYLNQVKLHPPVNRAVGTFSPADNSTWLSSAQLGAIAECQPAQNCSRLDVKIHTILAGHKKM	97	96
577	AWIWCAR	466	7	embryo	0.14756	0	False	EBZ_466.1_sets_embryo	0.0	0.0	1.0	1.0	0.0	0.0	0.0	466.1	sense;exonic;	RMWWPMFRSLKRAWIWCARRPSCE	24	1
578	RMWWPMFR	466	8	embryo	0.10754	0	False	EBZ_466.1_sets_embryo	0.0	0.0	1.0	1.0	0.0	0.0	0.0	466.1	sense;exonic;	RMWWPMFRSLKRAWIWCARRPSCE	24	1
579	RMWWPMFRSLK	466	11	embryo	0.016676	0	False	EBZ_466.1_sets_embryo	0.0	0.0	1.0	1.0	0.0	0.0	0.0	466.1	sense;exonic;	RMWWPMFRSLKRAWIWCARRPSCE	24	1
580	MWWPMFR	466	7	dev-adult	0.15737	0	False	EBZ_466.1_sets_embryo	0.0	0.0	1.0	1.0	0.0	0.0	0.0	466.1	sense;exonic;	RMWWPMFRSLKRAWIWCARRPSCE	24	1
581	DEGTGEKWPK	475	10	embryo	0.86219	0	False	EBZ_475.1_sets_embryo.dev-embryo	1.0	0.0	0.0	0.0	0.0	0.0	0.0	475.1	intergenic;	KEHVPVFIQFGIKIKPCSLANWQIFVVCSAQLWRENETLICRPKKDEGTGEKWPKDPTKNSEKKKTKEPVRKWAR	75	-1
582	EHVPVFIQFGIKIKPCSLANWQIFVVCSAQLWR	475	33	embryo	0.16714	0	False	EBZ_475.1_sets_embryo.dev-embryo	1.0	0.0	0.0	0.0	0.0	0.0	0.0	475.1	intergenic;	KEHVPVFIQFGIKIKPCSLANWQIFVVCSAQLWRENETLICRPKKDEGTGEKWPKDPTKNSEKKKTKEPVRKWAR	75	-1
583	IKPCSLANWQIFVVCSAQLWR	475	21	embryo	0.19826	0	False	EBZ_475.1_sets_embryo.dev-embryo	1.0	0.0	0.0	0.0	0.0	0.0	0.0	475.1	intergenic;	KEHVPVFIQFGIKIKPCSLANWQIFVVCSAQLWRENETLICRPKKDEGTGEKWPKDPTKNSEKKKTKEPVRKWAR	75	-1
584	KDEGTGEKWPK	475	11	embryo.dev-embryo	0.0075408	0	False	EBZ_475.1_sets_embryo.dev-embryo	1.0	0.0	0.0	0.0	0.0	0.0	0.0	475.1	intergenic;	KEHVPVFIQFGIKIKPCSLANWQIFVVCSAQLWRENETLICRPKKDEGTGEKWPKDPTKNSEKKKTKEPVRKWAR	75	-1
585	FVVPHEWNFNDLR	478	13	embryo	0.10717	0	False	EBZ_478.1_sets_embryo	1.0	0.0	0.0	0.0	0.0	0.0	0.0	478.1	intergenic;	SEAAPFLERAPDGTCKKTFQTKTYFSTKKFHLQMVEMPIFKVLKFVVPHEWNFNDLRCVRQVVLCTKTIFSSMLAGCLSSESGPCSPLDSS	91	33
586	FVVPHEWNFNDLRCVR	478	16	embryo	0.20519	0	False	EBZ_478.1_sets_embryo	1.0	0.0	0.0	0.0	0.0	0.0	0.0	478.1	intergenic;	SEAAPFLERAPDGTCKKTFQTKTYFSTKKFHLQMVEMPIFKVLKFVVPHEWNFNDLRCVRQVVLCTKTIFSSMLAGCLSSESGPCSPLDSS	91	33
587	KFHLQMVEMPIFK	478	13	dev-adult.embryo.PL	0.0016297	0	False	EBZ_478.1_sets_embryo	1.0	0.0	0.0	0.0	0.0	0.0	0.0	478.1	intergenic;	SEAAPFLERAPDGTCKKTFQTKTYFSTKKFHLQMVEMPIFKVLKFVVPHEWNFNDLRCVRQVVLCTKTIFSSMLAGCLSSESGPCSPLDSS	91	33
588	VLKFVVPHEWNFNDLR	478	16	embryo	0.17673	0	False	EBZ_478.1_sets_embryo	1.0	0.0	0.0	0.0	0.0	0.0	0.0	478.1	intergenic;	SEAAPFLERAPDGTCKKTFQTKTYFSTKKFHLQMVEMPIFKVLKFVVPHEWNFNDLRCVRQVVLCTKTIFSSMLAGCLSSESGPCSPLDSS	91	33
589	VLKFVVPHEWNFNDLRCVR	478	19	embryo	0.39286	0	False	EBZ_478.1_sets_embryo	1.0	0.0	0.0	0.0	0.0	0.0	0.0	478.1	intergenic;	SEAAPFLERAPDGTCKKTFQTKTYFSTKKFHLQMVEMPIFKVLKFVVPHEWNFNDLRCVRQVVLCTKTIFSSMLAGCLSSESGPCSPLDSS	91	33
590	SEAAPFLERAPDGTCK	478	16	dev-adult.PL	0.18253	0	False	EBZ_478.1_sets_embryo	1.0	0.0	0.0	0.0	0.0	0.0	0.0	478.1	intergenic;	SEAAPFLERAPDGTCKKTFQTKTYFSTKKFHLQMVEMPIFKVLKFVVPHEWNFNDLRCVRQVVLCTKTIFSSMLAGCLSSESGPCSPLDSS	91	33
591	MVTVWQQCLR	479	10	embryo.dev-embryo	0.00035879	0	False	EBZ_479.1_sets_embryo	1.0	0.0	0.0	0.0	0.0	0.0	0.0	479.1	intergenic;	QPSPPVLLALARSHCAALCRMVTVWQQCLRSWSQPDSRLAIKCHRSSLVLPDRDCD	56	20
592	IISIIGIIKIYS	481	12	embryo.dev-embryo	0.90656	0	False	EBZ_481.1_sets_embryo	1.0	0.0	0.0	0.0	0.0	0.0	0.0	481.1	intergenic;	VPHPHPVIKIISIIGIIKIYS	21	-1
593	VPHPHPVIK	481	9	dev-adult.embryo.dev-embryo.PL	0.0013911	0	False	EBZ_481.1_sets_embryo	1.0	0.0	0.0	0.0	0.0	0.0	0.0	481.1	intergenic;	VPHPHPVIKIISIIGIIKIYS	21	-1
594	SNEKPMFMR	485	9	embryo	0.005132899999999999	0	False	EBZ_485.1_sets_embryo	0.0	0.0	1.0	0.0	1.0	0.0	0.0	485.1	sense;intronic;	SNEKPMFMRLIIVKKL	16	5
595	ITFQWCTWK	486	9	dev-adult.embryo.PL	0.00062638	0	False	EBZ_486.1_sets_embryo	1.0	0.0	0.0	0.0	0.0	0.0	0.0	486.1	intergenic;	ITFQWCTWKYRLLRWHTFARRPEILRLCSLRSTASVLGVHFFRPSSIPVRRFRCSQFQESKLLVGANFGGPRQRLSVPSRFRKV	84	-1
596	ITFQWCTWKYR	486	11	embryo	0.1975	0	False	EBZ_486.1_sets_embryo	1.0	0.0	0.0	0.0	0.0	0.0	0.0	486.1	intergenic;	ITFQWCTWKYRLLRWHTFARRPEILRLCSLRSTASVLGVHFFRPSSIPVRRFRCSQFQESKLLVGANFGGPRQRLSVPSRFRKV	84	-1
597	ITFQWCTWKYRLLR	486	14	embryo	0.34253	0	False	EBZ_486.1_sets_embryo	1.0	0.0	0.0	0.0	0.0	0.0	0.0	486.1	intergenic;	ITFQWCTWKYRLLRWHTFARRPEILRLCSLRSTASVLGVHFFRPSSIPVRRFRCSQFQESKLLVGANFGGPRQRLSVPSRFRKV	84	-1
598	LCSLRSTASVLGVHFFRPSSIPVR	486	24	embryo	0.38299	0	False	EBZ_486.1_sets_embryo	1.0	0.0	0.0	0.0	0.0	0.0	0.0	486.1	intergenic;	ITFQWCTWKYRLLRWHTFARRPEILRLCSLRSTASVLGVHFFRPSSIPVRRFRCSQFQESKLLVGANFGGPRQRLSVPSRFRKV	84	-1
599	LLRWHTFARR	486	10	embryo	0.35692	0	False	EBZ_486.1_sets_embryo	1.0	0.0	0.0	0.0	0.0	0.0	0.0	486.1	intergenic;	ITFQWCTWKYRLLRWHTFARRPEILRLCSLRSTASVLGVHFFRPSSIPVRRFRCSQFQESKLLVGANFGGPRQRLSVPSRFRKV	84	-1
600	LSVPSRFRK	486	9	embryo	3.9191	0	False	EBZ_486.1_sets_embryo	1.0	0.0	0.0	0.0	0.0	0.0	0.0	486.1	intergenic;	ITFQWCTWKYRLLRWHTFARRPEILRLCSLRSTASVLGVHFFRPSSIPVRRFRCSQFQESKLLVGANFGGPRQRLSVPSRFRKV	84	-1
601	PSSIPVR	486	7	embryo	0.28344	0	False	EBZ_486.1_sets_embryo	1.0	0.0	0.0	0.0	0.0	0.0	0.0	486.1	intergenic;	ITFQWCTWKYRLLRWHTFARRPEILRLCSLRSTASVLGVHFFRPSSIPVRRFRCSQFQESKLLVGANFGGPRQRLSVPSRFRKV	84	-1
602	CSQFQESKLLVGANFGGPRQR	486	21	PL	0.14404	0	False	EBZ_486.1_sets_embryo	1.0	0.0	0.0	0.0	0.0	0.0	0.0	486.1	intergenic;	ITFQWCTWKYRLLRWHTFARRPEILRLCSLRSTASVLGVHFFRPSSIPVRRFRCSQFQESKLLVGANFGGPRQRLSVPSRFRKV	84	-1
603	LLRWHTFAR	486	9	PL	1.0379	0	False	EBZ_486.1_sets_embryo	1.0	0.0	0.0	0.0	0.0	0.0	0.0	486.1	intergenic;	ITFQWCTWKYRLLRWHTFARRPEILRLCSLRSTASVLGVHFFRPSSIPVRRFRCSQFQESKLLVGANFGGPRQRLSVPSRFRKV	84	-1
604	VIGFPTMLDNAR	490	12	embryo	0.14274	0	False	EBZ_490.1_sets_embryo	0.0	1.0	0.0	0.0	0.0	0.0	0.0	490.1	antisense;	LVALKIKNHVVYKTRQLFAGVLAQFSRLNKVIGFPTMLDNARR	43	36
605	VIGFPTMLDNARR	490	13	embryo	0.0034145000000000004	0	False	EBZ_490.1_sets_embryo	0.0	1.0	0.0	0.0	0.0	0.0	0.0	490.1	antisense;	LVALKIKNHVVYKTRQLFAGVLAQFSRLNKVIGFPTMLDNARR	43	36
607	IYIDFTGLSGVQDLR	504	15	embryo	0.00063463	0	False	EBZ_504.1_sets_embryo	0.0	1.0	0.0	0.0	0.0	0.0	0.0	504.1	antisense;	IYIDFTGLSGVQDLRSEFENAENIAARGRFHN	32	-1
608	LELTQMCLPR	508	10	embryo.dev-embryo	0.00010202	0	False	EBZ_508.1_sets_embryo	0.0	1.0	0.0	0.0	0.0	0.0	0.0	508.1	antisense;	LIFHLMDASRLELTQMCLPRGINHSWAEKYAKCARCRTFVI	41	5
609	LELTQMCLPRGINHSWAEKYAK	508	22	embryo	0.41981	0	False	EBZ_508.1_sets_embryo	0.0	1.0	0.0	0.0	0.0	0.0	0.0	508.1	antisense;	LIFHLMDASRLELTQMCLPRGINHSWAEKYAKCARCRTFVI	41	5
610	LIFHLMDASRLELTQMCLPR	508	20	embryo	0.19114	0	False	EBZ_508.1_sets_embryo	0.0	1.0	0.0	0.0	0.0	0.0	0.0	508.1	antisense;	LIFHLMDASRLELTQMCLPRGINHSWAEKYAKCARCRTFVI	41	5
611	GINHSWAEK	508	9	dev-embryo	0.44506	0	False	EBZ_508.1_sets_embryo	0.0	1.0	0.0	0.0	0.0	0.0	0.0	508.1	antisense;	LIFHLMDASRLELTQMCLPRGINHSWAEKYAKCARCRTFVI	41	5
612	LELTQMCLPRGINHSWAEK	508	19	dev-embryo	0.19834	0	False	EBZ_508.1_sets_embryo	0.0	1.0	0.0	0.0	0.0	0.0	0.0	508.1	antisense;	LIFHLMDASRLELTQMCLPRGINHSWAEKYAKCARCRTFVI	41	5
613	IVWSAIHNNNR	512	11	embryo	0.41569	0	False	EBZ_512.1_sets_PL.embryo.dev-embryo	0.0	1.0	0.0	0.0	0.0	0.0	0.0	512.1	antisense;	IVWSAIHNNNRNSCSSVDGMKTIGMYRAFGGK	32	19
614	NSCSSVDGMKTIGMYR	512	16	embryo	0.19114	0	False	EBZ_512.1_sets_PL.embryo.dev-embryo	0.0	1.0	0.0	0.0	0.0	0.0	0.0	512.1	antisense;	IVWSAIHNNNRNSCSSVDGMKTIGMYRAFGGK	32	19
615	NSCSSVDGMKTIGMYRAFGGK	512	21	embryo	0.0037537	0	False	EBZ_512.1_sets_PL.embryo.dev-embryo	0.0	1.0	0.0	0.0	0.0	0.0	0.0	512.1	antisense;	IVWSAIHNNNRNSCSSVDGMKTIGMYRAFGGK	32	19
616	TIGMYRAFGGK	512	11	embryo.dev-adult	0.11266	0	False	EBZ_512.1_sets_PL.embryo.dev-embryo	0.0	1.0	0.0	0.0	0.0	0.0	0.0	512.1	antisense;	IVWSAIHNNNRNSCSSVDGMKTIGMYRAFGGK	32	19
617	IVWSAIHNNNRNSCSSVDGMKTIGMYR	512	27	dev-adult	0.20657	0	False	EBZ_512.1_sets_PL.embryo.dev-embryo	0.0	1.0	0.0	0.0	0.0	0.0	0.0	512.1	antisense;	IVWSAIHNNNRNSCSSVDGMKTIGMYRAFGGK	32	19
618	AADASRQWR	513	9	dev-adult.embryo.dev-embryo.PL	0.00093087	0	False	EBZ_513.1_sets_embryo.dev-adult	0.0	1.0	0.0	0.0	0.0	0.0	0.0	513.1	antisense;	KQASRAADASRQWRFPTVFEIHQAHPRTWAALYPDGQTLLWHRFLYDLSSGHASPTLNAPAPVPQNKFQNAG	72	-1
619	AADASRQWRFPTVFEIHQAHPR	513	22	embryo	0.40571	0	False	EBZ_513.1_sets_embryo.dev-adult	0.0	1.0	0.0	0.0	0.0	0.0	0.0	513.1	antisense;	KQASRAADASRQWRFPTVFEIHQAHPRTWAALYPDGQTLLWHRFLYDLSSGHASPTLNAPAPVPQNKFQNAG	72	-1
620	ALENILLLYTFHRC	514	14	embryo.PL	1.4952000000000002e-10	0	False	EBZ_514.1_sets_embryo	0.0	1.0	0.0	0.0	0.0	0.0	0.0	514.1	antisense;	KPSKAYILKSVVSFKALENILLLYTFHRC	29	-1
621	KSTLFAPALR	515	10	embryo	0.21275	0	False	EBZ_515.1_sets_embryo	0.0	1.0	0.0	0.0	0.0	0.0	0.0	515.1	antisense;	SISQATSMSLLRKSTLFAPALRCLNLHLA	29	7
622	SISQATSMSLLR	515	12	embryo.dev-embryo	0.0034129	0	False	EBZ_515.1_sets_embryo	0.0	1.0	0.0	0.0	0.0	0.0	0.0	515.1	antisense;	SISQATSMSLLRKSTLFAPALRCLNLHLA	29	7
623	SISQATSMSLLRKSTLFAPALR	515	22	embryo	0.42022	0	False	EBZ_515.1_sets_embryo	0.0	1.0	0.0	0.0	0.0	0.0	0.0	515.1	antisense;	SISQATSMSLLRKSTLFAPALRCLNLHLA	29	7
624	ILLNHTFDWSPYAEQLARIMGEIEMTVEFMTPRR	524	34	embryo	0.010836	0	False	EBZ_524.1_sets_embryo	1.0	0.0	0.0	0.0	0.0	0.0	0.0	524.1	intergenic;	NYGIRILLNHTFDWSPYAEQLARIMGEIEMTVEFMTPRRGS	41	24
625	IMGEIEMTVEFMTPRR	524	16	embryo.dev-embryo.PL	0.11821	0	False	EBZ_524.1_sets_embryo	1.0	0.0	0.0	0.0	0.0	0.0	0.0	524.1	intergenic;	NYGIRILLNHTFDWSPYAEQLARIMGEIEMTVEFMTPRRGS	41	24
626	NYGIRILLNHTFDWSPYAEQLARIMGEIEMTVEFMTPR	524	38	embryo	0.24019	0	False	EBZ_524.1_sets_embryo	1.0	0.0	0.0	0.0	0.0	0.0	0.0	524.1	intergenic;	NYGIRILLNHTFDWSPYAEQLARIMGEIEMTVEFMTPRRGS	41	24
627	IMGEIEMTVEFMTPR	524	15	PL	0.16435	0	False	EBZ_524.1_sets_embryo	1.0	0.0	0.0	0.0	0.0	0.0	0.0	524.1	intergenic;	NYGIRILLNHTFDWSPYAEQLARIMGEIEMTVEFMTPRRGS	41	24
628	ILLNHTFDWSPYAEQLAR	524	18	dev-embryo	0.15302000000000002	0	False	EBZ_524.1_sets_embryo	1.0	0.0	0.0	0.0	0.0	0.0	0.0	524.1	intergenic;	NYGIRILLNHTFDWSPYAEQLARIMGEIEMTVEFMTPRRGS	41	24
629	ILLNHTFDWSPYAEQLARIMGEIEMTVEFMTPR	524	33	dev-embryo	0.1372	0	False	EBZ_524.1_sets_embryo	1.0	0.0	0.0	0.0	0.0	0.0	0.0	524.1	intergenic;	NYGIRILLNHTFDWSPYAEQLARIMGEIEMTVEFMTPRRGS	41	24
630	QCYCDYGAVRADHQREQR	525	18	embryo	0.011532	0	False	EBZ_525.1_sets_embryo	0.0	0.0	1.0	1.0	0.0	0.0	0.0	525.1	sense;exonic;	QCYCDYGAVRADHQREQRKQRH	22	-1
631	APATYWVVNLCFPLFISNNIKALKVCLSAHCLV	528	33	embryo	0.0031121	0	False	EBZ_528.1_sets_embryo	1.0	0.0	0.0	0.0	0.0	0.0	0.0	528.1	intergenic;	APATYWVVNLCFPLFISNNIKALKVCLSAHCLV	33	-1
632	NTMTRSRIMMATSSR	532	15	embryo.PL	0.0016897	0	False	EBZ_532.1_sets_PL.embryo	0.0	0.0	1.0	1.0	0.0	0.0	0.0	532.1	sense;exonic;	NTMTRSRIMMATSSRTPTMMLRRKWTAMRRHRCIRQSLQGHNCAN	45	2
633	TPTMMLRR	532	8	embryo	0.13330999999999998	0	False	EBZ_532.1_sets_PL.embryo	0.0	0.0	1.0	1.0	0.0	0.0	0.0	532.1	sense;exonic;	NTMTRSRIMMATSSRTPTMMLRRKWTAMRRHRCIRQSLQGHNCAN	45	2
634	SRIMMATSSRTPTMMLR	532	17	PL	0.14044	0	False	EBZ_532.1_sets_PL.embryo	0.0	0.0	1.0	1.0	0.0	0.0	0.0	532.1	sense;exonic;	NTMTRSRIMMATSSRTPTMMLRRKWTAMRRHRCIRQSLQGHNCAN	45	2
635	SQRNQVSFFR	543	10	embryo	0.0056971	0	False	EBZ_543.1_sets_embryo	0.0	1.0	0.0	0.0	0.0	0.0	0.0	543.1	antisense;	SQRNQVSFFRSHLGKRSTRHLFHFDEQSLTPPEHVVLLLNLPQDGGHKQQQ	51	-1
636	SQRNQVSFFRSHLGK	543	15	embryo	0.38347	0	False	EBZ_543.1_sets_embryo	0.0	1.0	0.0	0.0	0.0	0.0	0.0	543.1	antisense;	SQRNQVSFFRSHLGKRSTRHLFHFDEQSLTPPEHVVLLLNLPQDGGHKQQQ	51	-1
637	STRHLFHFDEQSLTPPEHVVLLLNLPQDGGHKQQQ	543	35	embryo	0.16249	0	False	EBZ_543.1_sets_embryo	0.0	1.0	0.0	0.0	0.0	0.0	0.0	543.1	antisense;	SQRNQVSFFRSHLGKRSTRHLFHFDEQSLTPPEHVVLLLNLPQDGGHKQQQ	51	-1
638	HLFHFDEQSLTPPEHVVLLLNLPQDGGHK	543	29	dev-adult	0.16967000000000002	0	False	EBZ_543.1_sets_embryo	0.0	1.0	0.0	0.0	0.0	0.0	0.0	543.1	antisense;	SQRNQVSFFRSHLGKRSTRHLFHFDEQSLTPPEHVVLLLNLPQDGGHKQQQ	51	-1
640	AGEGQSSR	548	8	embryo.dev-embryo.dev-adult	0.35174	0	False	EBZ_548.1_sets_PL.embryo	0.0	3.0	0.0	0.0	0.0	0.0	0.0	548.1	antisense;	SAIWQGGGLVREIVHGVGNQVGGHGHRLLELAPYVVGEGFMWLGFLLGHVAYSRILLMISKGNHERSLEIGLIKAGEGQSSRCRFKLGNRDPFGKIGHGILVGAAVIALKLSVQVGGEGHVQLVGVAGQKFLAGVEDVEVMGWIHRRGGHAVLLLALSADLAQGDLGLIDGQILGVQRYVLGVFQGFDQDLYGTGKTQVLRILQQCQNAEMVLLRAQRCGQAVVVVGGLDGVGG	234	40
642	AGEGQSSRCRFK	548	12	embryo.dev-embryo	0.36395	0	False	EBZ_548.1_sets_PL.embryo	0.0	3.0	0.0	0.0	0.0	0.0	0.0	548.1	antisense;	SAIWQGGGLVREIVHGVGNQVGGHGHRLLELAPYVVGEGFMWLGFLLGHVAYSRILLMISKGNHERSLEIGLIKAGEGQSSRCRFKLGNRDPFGKIGHGILVGAAVIALKLSVQVGGEGHVQLVGVAGQKFLAGVEDVEVMGWIHRRGGHAVLLLALSADLAQGDLGLIDGQILGVQRYVLGVFQGFDQDLYGTGKTQVLRILQQCQNAEMVLLRAQRCGQAVVVVGGLDGVGG	234	40
644	ILLMISKGNHERSLEIGLIK	548	20	dev-adult.embryo.dev-embryo.PL	0.0016177	0	False	EBZ_548.1_sets_PL.embryo	0.0	3.0	0.0	0.0	0.0	0.0	0.0	548.1	antisense;	SAIWQGGGLVREIVHGVGNQVGGHGHRLLELAPYVVGEGFMWLGFLLGHVAYSRILLMISKGNHERSLEIGLIKAGEGQSSRCRFKLGNRDPFGKIGHGILVGAAVIALKLSVQVGGEGHVQLVGVAGQKFLAGVEDVEVMGWIHRRGGHAVLLLALSADLAQGDLGLIDGQILGVQRYVLGVFQGFDQDLYGTGKTQVLRILQQCQNAEMVLLRAQRCGQAVVVVGGLDGVGG	234	40
646	ILLMISKGNHER	548	12	dev-embryo	0.26882	0	False	EBZ_548.1_sets_PL.embryo	0.0	3.0	0.0	0.0	0.0	0.0	0.0	548.1	antisense;	SAIWQGGGLVREIVHGVGNQVGGHGHRLLELAPYVVGEGFMWLGFLLGHVAYSRILLMISKGNHERSLEIGLIKAGEGQSSRCRFKLGNRDPFGKIGHGILVGAAVIALKLSVQVGGEGHVQLVGVAGQKFLAGVEDVEVMGWIHRRGGHAVLLLALSADLAQGDLGLIDGQILGVQRYVLGVFQGFDQDLYGTGKTQVLRILQQCQNAEMVLLRAQRCGQAVVVVGGLDGVGG	234	40
647	MELLGYLNLK	550	10	embryo.dev-embryo.PL	0.00054277	0	False	EBZ_550.1_sets_PL.embryo	0.0	0.0	1.0	0.0	0.0	0.0	1.0	550.1	sense;threeUTR;	MELLGYLNLKYSVNT	15	0
648	SHSAGRPSKHGQMESQR	552	17	embryo	0.010379	0	False	EBZ_552.1_sets_embryo	1.0	0.0	0.0	0.0	0.0	0.0	0.0	552.1	intergenic;	SHSAGRPSKHGQMESQR	17	12
649	LFAEFCVFMKTISGR	553	15	embryo	0.0078914	0	False	EBZ_553.1_sets_embryo	0.0	0.0	1.0	0.0	1.0	0.0	0.0	553.1	sense;intronic;	LFAEFCVFMKTISGRQ	16	8
650	AATGITNRDDSGK	555	13	dev-adult.embryo.dev-embryo.PL	0.00031715	0	False	EBZ_555.1_sets_PL.embryo	0.0	1.0	0.0	0.0	0.0	0.0	0.0	555.1	antisense;	SIPSILQPICDQPEFRFQFRSLPQTSLPFPKDILAWQCTCRDQCLFRAATGITNRDDSGKLTEPRA	66	-1
651	DILAWQCTCR	555	10	dev-adult.embryo.PL	0.34881	0	False	EBZ_555.1_sets_PL.embryo	0.0	1.0	0.0	0.0	0.0	0.0	0.0	555.1	antisense;	SIPSILQPICDQPEFRFQFRSLPQTSLPFPKDILAWQCTCRDQCLFRAATGITNRDDSGKLTEPRA	66	-1
652	DILAWQCTCRDQCLFR	555	16	embryo	0.1438	0	False	EBZ_555.1_sets_PL.embryo	0.0	1.0	0.0	0.0	0.0	0.0	0.0	555.1	antisense;	SIPSILQPICDQPEFRFQFRSLPQTSLPFPKDILAWQCTCRDQCLFRAATGITNRDDSGKLTEPRA	66	-1
653	DILAWQCTCRDQCLFRAATGITNR	555	24	embryo	0.17142000000000002	0	False	EBZ_555.1_sets_PL.embryo	0.0	1.0	0.0	0.0	0.0	0.0	0.0	555.1	antisense;	SIPSILQPICDQPEFRFQFRSLPQTSLPFPKDILAWQCTCRDQCLFRAATGITNRDDSGKLTEPRA	66	-1
654	FQFRSLPQTSLPFPK	555	15	embryo	0.8981299999999999	0	False	EBZ_555.1_sets_PL.embryo	0.0	1.0	0.0	0.0	0.0	0.0	0.0	555.1	antisense;	SIPSILQPICDQPEFRFQFRSLPQTSLPFPKDILAWQCTCRDQCLFRAATGITNRDDSGKLTEPRA	66	-1
655	SLPQTSLPFPKDILAWQCTCR	555	21	embryo.dev-adult	0.19897	0	False	EBZ_555.1_sets_PL.embryo	0.0	1.0	0.0	0.0	0.0	0.0	0.0	555.1	antisense;	SIPSILQPICDQPEFRFQFRSLPQTSLPFPKDILAWQCTCRDQCLFRAATGITNRDDSGKLTEPRA	66	-1
656	AATGITNRDDSGKLTEPR	555	18	PL	0.36319	0	False	EBZ_555.1_sets_PL.embryo	0.0	1.0	0.0	0.0	0.0	0.0	0.0	555.1	antisense;	SIPSILQPICDQPEFRFQFRSLPQTSLPFPKDILAWQCTCRDQCLFRAATGITNRDDSGKLTEPRA	66	-1
657	DQCLFRAATGITNR	555	14	PL	0.94717	0	False	EBZ_555.1_sets_PL.embryo	0.0	1.0	0.0	0.0	0.0	0.0	0.0	555.1	antisense;	SIPSILQPICDQPEFRFQFRSLPQTSLPFPKDILAWQCTCRDQCLFRAATGITNRDDSGKLTEPRA	66	-1
658	FQFRSLPQTSLPFPKDILAWQCTCR	555	25	PL	0.14745999999999998	0	False	EBZ_555.1_sets_PL.embryo	0.0	1.0	0.0	0.0	0.0	0.0	0.0	555.1	antisense;	SIPSILQPICDQPEFRFQFRSLPQTSLPFPKDILAWQCTCRDQCLFRAATGITNRDDSGKLTEPRA	66	-1
659	SIPSILQPICDQPEFRFQFR	555	20	dev-adult	0.20541	0	False	EBZ_555.1_sets_PL.embryo	0.0	1.0	0.0	0.0	0.0	0.0	0.0	555.1	antisense;	SIPSILQPICDQPEFRFQFRSLPQTSLPFPKDILAWQCTCRDQCLFRAATGITNRDDSGKLTEPRA	66	-1
660	KLNYGPIQR	559	9	embryo.dev-embryo	0.0065589	0	False	EBZ_559.1_sets_embryo	0.0	0.0	1.0	0.0	1.0	0.0	0.0	559.1	sense;intronic;	CLKKLNYGPIQRQTKRCTGHFAR	23	-1
661	LNYGPIQR	559	8	embryo	0.13448	0	False	EBZ_559.1_sets_embryo	0.0	0.0	1.0	0.0	1.0	0.0	0.0	559.1	sense;intronic;	CLKKLNYGPIQRQTKRCTGHFAR	23	-1
662	LNYGPIQRQTK	559	11	dev-adult	0.12968	0	False	EBZ_559.1_sets_embryo	0.0	0.0	1.0	0.0	1.0	0.0	0.0	559.1	sense;intronic;	CLKKLNYGPIQRQTKRCTGHFAR	23	-1
663	FQPSKVGYTFCHLMGEGNFAWISDLRVSCTQ	560	31	embryo	0.41488	0	False	EBZ_560.1_sets_embryo.dev-embryo	1.0	0.0	0.0	0.0	0.0	0.0	0.0	560.1	intergenic;	RITTIRPCFCKFLRLSRVSGLLKFQPSKVGYTFCHLMGEGNFAWISDLRVSCTQ	54	36
664	ITTIRPCFCKFLR	560	13	dev-adult.embryo.dev-embryo.PL	7.8104e-05	0	False	EBZ_560.1_sets_embryo.dev-embryo	1.0	0.0	0.0	0.0	0.0	0.0	0.0	560.1	intergenic;	RITTIRPCFCKFLRLSRVSGLLKFQPSKVGYTFCHLMGEGNFAWISDLRVSCTQ	54	36
665	PCFCKFLRLSR	560	11	embryo	0.20973000000000006	0	False	EBZ_560.1_sets_embryo.dev-embryo	1.0	0.0	0.0	0.0	0.0	0.0	0.0	560.1	intergenic;	RITTIRPCFCKFLRLSRVSGLLKFQPSKVGYTFCHLMGEGNFAWISDLRVSCTQ	54	36
666	RITTIRPCFCK	560	11	dev-adult.embryo.PL	0.33709	0	False	EBZ_560.1_sets_embryo.dev-embryo	1.0	0.0	0.0	0.0	0.0	0.0	0.0	560.1	intergenic;	RITTIRPCFCKFLRLSRVSGLLKFQPSKVGYTFCHLMGEGNFAWISDLRVSCTQ	54	36
667	VGYTFCHLMGEGNFAWISDLR	560	21	embryo	0.20001	0	False	EBZ_560.1_sets_embryo.dev-embryo	1.0	0.0	0.0	0.0	0.0	0.0	0.0	560.1	intergenic;	RITTIRPCFCKFLRLSRVSGLLKFQPSKVGYTFCHLMGEGNFAWISDLRVSCTQ	54	36
668	FQPSKVGYTFCHLMGEGNFAWISDLR	560	26	dev-embryo	0.27087	0	False	EBZ_560.1_sets_embryo.dev-embryo	1.0	0.0	0.0	0.0	0.0	0.0	0.0	560.1	intergenic;	RITTIRPCFCKFLRLSRVSGLLKFQPSKVGYTFCHLMGEGNFAWISDLRVSCTQ	54	36
669	VSGLLKFQPSK	560	11	dev-embryo	0.19973	0	False	EBZ_560.1_sets_embryo.dev-embryo	1.0	0.0	0.0	0.0	0.0	0.0	0.0	560.1	intergenic;	RITTIRPCFCKFLRLSRVSGLLKFQPSKVGYTFCHLMGEGNFAWISDLRVSCTQ	54	36
670	LQKGRLNEK	564	9	embryo.dev-embryo.dev-adult	0.0019692	0	False	EBZ_564.1_sets_embryo	1.0	0.0	0.0	0.0	0.0	0.0	0.0	564.1	intergenic;	LQKGRLNEKVSGKDGAPLAEMKGRSRVGRSWELETHAVFALVESFDIARVSGADGTKSTLLLSTPKLGVFLR	72	20
671	SWELETHAVFALVESFDIAR	564	20	embryo	0.23374	0	False	EBZ_564.1_sets_embryo	1.0	0.0	0.0	0.0	0.0	0.0	0.0	564.1	intergenic;	LQKGRLNEKVSGKDGAPLAEMKGRSRVGRSWELETHAVFALVESFDIARVSGADGTKSTLLLSTPKLGVFLR	72	20
672	VSGADGTK	564	8	dev-embryo	3.4954	0	False	EBZ_564.1_sets_embryo	1.0	0.0	0.0	0.0	0.0	0.0	0.0	564.1	intergenic;	LQKGRLNEKVSGKDGAPLAEMKGRSRVGRSWELETHAVFALVESFDIARVSGADGTKSTLLLSTPKLGVFLR	72	20
673	DSITVNAIFER	565	11	embryo.dev-adult	0.00017372	0	False	EBZ_565.1_sets_embryo	0.0	0.0	1.0	0.0	0.0	0.0	0.0	565.1	sense;	IDVFISLSFARKQSEYKSYNNCKVSRIKDSITVNAIFERSDYYIPVYSAKRSAIHLKIDNQHKE	64	-1
674	DSITVNAIFERSDYYIPVYSAKR	565	23	embryo	0.40851	0	False	EBZ_565.1_sets_embryo	0.0	0.0	1.0	0.0	0.0	0.0	0.0	565.1	sense;	IDVFISLSFARKQSEYKSYNNCKVSRIKDSITVNAIFERSDYYIPVYSAKRSAIHLKIDNQHKE	64	-1
675	IKDSITVNAIFERSDYYIPVYSAK	565	24	embryo	0.43238	0	False	EBZ_565.1_sets_embryo	0.0	0.0	1.0	0.0	0.0	0.0	0.0	565.1	sense;	IDVFISLSFARKQSEYKSYNNCKVSRIKDSITVNAIFERSDYYIPVYSAKRSAIHLKIDNQHKE	64	-1
676	SAIHLKIDNQHK	565	12	embryo	0.1782	0	False	EBZ_565.1_sets_embryo	0.0	0.0	1.0	0.0	0.0	0.0	0.0	565.1	sense;	IDVFISLSFARKQSEYKSYNNCKVSRIKDSITVNAIFERSDYYIPVYSAKRSAIHLKIDNQHKE	64	-1
677	VSRIKDSITVNAIFER	565	16	embryo	0.094488	0	False	EBZ_565.1_sets_embryo	0.0	0.0	1.0	0.0	0.0	0.0	0.0	565.1	sense;	IDVFISLSFARKQSEYKSYNNCKVSRIKDSITVNAIFERSDYYIPVYSAKRSAIHLKIDNQHKE	64	-1
678	CLSPFEIR	570	8	embryo.dev-embryo	0.14622000000000002	0	False	EBZ_570.1_sets_embryo	0.0	0.0	1.0	0.0	1.0	0.0	0.0	570.1	sense;intronic;	CLSPFEIRISWVFSPLFFSFGPLANHR	27	-1
679	CLSPFEIRISWVFSPLFFSFGPLANHR	570	27	embryo.dev-embryo	0.13785	0	False	EBZ_570.1_sets_embryo	0.0	0.0	1.0	0.0	1.0	0.0	0.0	570.1	sense;intronic;	CLSPFEIRISWVFSPLFFSFGPLANHR	27	-1
680	ISWVFSPLFFSFGPLANHR	570	19	embryo.dev-embryo	0.001569	0	False	EBZ_570.1_sets_embryo	0.0	0.0	1.0	0.0	1.0	0.0	0.0	570.1	sense;intronic;	CLSPFEIRISWVFSPLFFSFGPLANHR	27	-1
681	HASNQKK	571	7	embryo.PL	0.32237	0	False	EBZ_571.1_sets_PL.embryo	0.0	0.0	1.0	0.0	1.0	0.0	0.0	571.1	sense;intronic;	HFNMNAQKHASNQKKIQIIMPNSFFICSIHIREHVL	36	3
682	IQIIMPNSFFICSIHIR	571	17	embryo.PL	0.0020254	0	False	EBZ_571.1_sets_PL.embryo	0.0	0.0	1.0	0.0	1.0	0.0	0.0	571.1	sense;intronic;	HFNMNAQKHASNQKKIQIIMPNSFFICSIHIREHVL	36	3
683	HFNMNAQKHASNQK	571	14	PL	0.98361	0	False	EBZ_571.1_sets_PL.embryo	0.0	0.0	1.0	0.0	1.0	0.0	0.0	571.1	sense;intronic;	HFNMNAQKHASNQKKIQIIMPNSFFICSIHIREHVL	36	3
684	IVSQPTKRMAR	572	11	embryo	0.012774	0	False	EBZ_572.1_sets_embryo	0.0	0.0	1.0	0.0	1.0	0.0	0.0	572.1	sense;intronic;	RKIVSQPTKRMARKIEN	17	10
685	VSLALAFFLSMR	574	12	embryo.dev-embryo.PL	0.001401	0	False	EBZ_574.1_sets_embryo	0.0	0.0	1.0	0.0	0.0	1.0	0.0	574.1	sense;fiveUTR;	VSLALAFFLSMRVCVVA	17	10
686	QTEGGDKIITGLK	576	13	embryo.dev-adult	0.00051291	0	False	EBZ_576.1_sets_embryo	0.0	0.0	1.0	0.0	1.0	0.0	0.0	576.1	sense;intronic;	QTEGGDKIITGLKITRWGGVGGCDFPAPYKNSRQIVC	37	-1
687	WGGVGGCDFPAPYK	576	14	embryo.dev-adult	0.40344	0	False	EBZ_576.1_sets_embryo	0.0	0.0	1.0	0.0	1.0	0.0	0.0	576.1	sense;intronic;	QTEGGDKIITGLKITRWGGVGGCDFPAPYKNSRQIVC	37	-1
688	ITTLYSSYFNWLSSK	580	15	embryo	0.00066124	0	False	EBZ_580.1_sets_embryo	0.0	1.0	0.0	0.0	0.0	0.0	0.0	580.1	antisense;	ITTLYSSYFNWLSSKLLFAALLREQK	26	-1
689	FSFRNKLLNENGEMFGSR	590	18	embryo	0.15029	0	False	EBZ_590.1_sets_embryo.dev-embryo	0.0	0.0	1.0	0.0	0.0	0.0	1.0	590.1	sense;threeUTR;	WAWSLESPVSFSSCCCSSRFSFRNKLLNENGEMFGSRRHAS	41	32
690	LLNENGEMFGSRR	590	13	dev-adult.embryo.dev-embryo.PL	0.0016545000000000002	0	False	EBZ_590.1_sets_embryo.dev-embryo	0.0	0.0	1.0	0.0	0.0	0.0	1.0	590.1	sense;threeUTR;	WAWSLESPVSFSSCCCSSRFSFRNKLLNENGEMFGSRRHAS	41	32
691	LLNENGEMFGSRRHAS	590	16	PL	0.37981	0	False	EBZ_590.1_sets_embryo.dev-embryo	0.0	0.0	1.0	0.0	0.0	0.0	1.0	590.1	sense;threeUTR;	WAWSLESPVSFSSCCCSSRFSFRNKLLNENGEMFGSRRHAS	41	32
692	WAWSLESPVSFSSCCCSSRFSFRNK	590	25	dev-embryo	0.17079	0	False	EBZ_590.1_sets_embryo.dev-embryo	0.0	0.0	1.0	0.0	0.0	0.0	1.0	590.1	sense;threeUTR;	WAWSLESPVSFSSCCCSSRFSFRNKLLNENGEMFGSRRHAS	41	32
693	LLCMYKSTITISFICLFGVIRNK	592	23	embryo.PL	0.00301	0	False	EBZ_592.1_sets_PL.embryo	0.0	0.0	1.0	0.0	1.0	0.0	0.0	592.1	sense;intronic;	QITLKLLCMYKSTITISFICLFGVIRNKTLN	31	8
694	QITLKLLCMYK	592	11	embryo	0.15093	0	False	EBZ_592.1_sets_PL.embryo	0.0	0.0	1.0	0.0	1.0	0.0	0.0	592.1	sense;intronic;	QITLKLLCMYKSTITISFICLFGVIRNKTLN	31	8
695	ASSSASATIRCTAAGNLSMSRR	593	22	embryo.dev-embryo.dev-adult	0.0088134	0	False	EBZ_593.1_sets_PL.embryo.dev-adult	0.0	1.0	0.0	0.0	0.0	0.0	0.0	593.1	antisense;	VAMLQPMGGERRASSSASATIRCTAAGNLSMSRRVKRMARSSCNI	45	2
696	VAMLQPMGGERR	593	12	dev-adult.embryo.PL	0.12399	0	False	EBZ_593.1_sets_PL.embryo.dev-adult	0.0	1.0	0.0	0.0	0.0	0.0	0.0	593.1	antisense;	VAMLQPMGGERRASSSASATIRCTAAGNLSMSRRVKRMARSSCNI	45	2
697	VAMLQPMGGER	593	11	dev-adult	0.35715	0	False	EBZ_593.1_sets_PL.embryo.dev-adult	0.0	1.0	0.0	0.0	0.0	0.0	0.0	593.1	antisense;	VAMLQPMGGERRASSSASATIRCTAAGNLSMSRRVKRMARSSCNI	45	2
699	FSDALGEHLQR	598	11	dev-adult.embryo.dev-embryo.PL	0.071301	0	False	EBZ_598.1_sets_embryo.dev-embryo	0.0	1.0	0.0	0.0	0.0	0.0	0.0	598.1	antisense;	SGHHPKMVKYRYYLLLMLSYSLFYAHLEADNQRFQSFELTEQRVVDGHHVADFVDQRFSDALGEHLQRLLYACVRSHDSGGWRSCSRSLIFILSELLLLLAGHRIEILMQMGKVPDRF	118	6
701	IEILMQMGKVPDR	598	13	embryo.dev-embryo.PL	0.0073233	0	False	EBZ_598.1_sets_embryo.dev-embryo	0.0	1.0	0.0	0.0	0.0	0.0	0.0	598.1	antisense;	SGHHPKMVKYRYYLLLMLSYSLFYAHLEADNQRFQSFELTEQRVVDGHHVADFVDQRFSDALGEHLQRLLYACVRSHDSGGWRSCSRSLIFILSELLLLLAGHRIEILMQMGKVPDRF	118	6
703	SHDSGGWRSCSR	598	12	embryo	0.17535	0	False	EBZ_598.1_sets_embryo.dev-embryo	0.0	1.0	0.0	0.0	0.0	0.0	0.0	598.1	antisense;	SGHHPKMVKYRYYLLLMLSYSLFYAHLEADNQRFQSFELTEQRVVDGHHVADFVDQRFSDALGEHLQRLLYACVRSHDSGGWRSCSRSLIFILSELLLLLAGHRIEILMQMGKVPDRF	118	6
705	VVDGHHVADFVDQR	598	14	embryo	0.13464	0	False	EBZ_598.1_sets_embryo.dev-embryo	0.0	1.0	0.0	0.0	0.0	0.0	0.0	598.1	antisense;	SGHHPKMVKYRYYLLLMLSYSLFYAHLEADNQRFQSFELTEQRVVDGHHVADFVDQRFSDALGEHLQRLLYACVRSHDSGGWRSCSRSLIFILSELLLLLAGHRIEILMQMGKVPDRF	118	6
707	FQSFELTEQR	598	10	PL	0.45205	0	False	EBZ_598.1_sets_embryo.dev-embryo	0.0	1.0	0.0	0.0	0.0	0.0	0.0	598.1	antisense;	SGHHPKMVKYRYYLLLMLSYSLFYAHLEADNQRFQSFELTEQRVVDGHHVADFVDQRFSDALGEHLQRLLYACVRSHDSGGWRSCSRSLIFILSELLLLLAGHRIEILMQMGKVPDRF	118	6
709	IEILMQMGK	598	9	PL	0.14647000000000002	0	False	EBZ_598.1_sets_embryo.dev-embryo	0.0	1.0	0.0	0.0	0.0	0.0	0.0	598.1	antisense;	SGHHPKMVKYRYYLLLMLSYSLFYAHLEADNQRFQSFELTEQRVVDGHHVADFVDQRFSDALGEHLQRLLYACVRSHDSGGWRSCSRSLIFILSELLLLLAGHRIEILMQMGKVPDRF	118	6
711	LLYACVRSHDSGGWR	598	15	PL	1.0303	0	False	EBZ_598.1_sets_embryo.dev-embryo	0.0	1.0	0.0	0.0	0.0	0.0	0.0	598.1	antisense;	SGHHPKMVKYRYYLLLMLSYSLFYAHLEADNQRFQSFELTEQRVVDGHHVADFVDQRFSDALGEHLQRLLYACVRSHDSGGWRSCSRSLIFILSELLLLLAGHRIEILMQMGKVPDRF	118	6
713	FQSFELTEQRVVDGHHVADFVDQRFSDALGEHLQR	598	35	dev-embryo	0.14889000000000002	0	False	EBZ_598.1_sets_embryo.dev-embryo	0.0	1.0	0.0	0.0	0.0	0.0	0.0	598.1	antisense;	SGHHPKMVKYRYYLLLMLSYSLFYAHLEADNQRFQSFELTEQRVVDGHHVADFVDQRFSDALGEHLQRLLYACVRSHDSGGWRSCSRSLIFILSELLLLLAGHRIEILMQMGKVPDRF	118	6
715	LLYACVRSHDSGGWRSCSR	598	19	dev-embryo	0.15348	0	False	EBZ_598.1_sets_embryo.dev-embryo	0.0	1.0	0.0	0.0	0.0	0.0	0.0	598.1	antisense;	SGHHPKMVKYRYYLLLMLSYSLFYAHLEADNQRFQSFELTEQRVVDGHHVADFVDQRFSDALGEHLQRLLYACVRSHDSGGWRSCSRSLIFILSELLLLLAGHRIEILMQMGKVPDRF	118	6
716	DKIPLSNTFDGK	601	12	dev-adult.embryo.dev-embryo.PL	0.00040374	0	False	EBZ_601.1_sets_embryo.dev-embryo	0.0	0.0	1.0	0.0	0.0	0.0	0.0	601.1	sense;	TTLMASLMTLTELCRTLSKDKIPLSNTFDGKHHPIRSN	38	3
717	DKIPLSNTFDGKHHPIR	601	17	embryo	0.37546	0	False	EBZ_601.1_sets_embryo.dev-embryo	0.0	0.0	1.0	0.0	0.0	0.0	0.0	601.1	sense;	TTLMASLMTLTELCRTLSKDKIPLSNTFDGKHHPIRSN	38	3
718	IPLSNTFDGK	601	10	embryo.dev-adult	0.11851	0	False	EBZ_601.1_sets_embryo.dev-embryo	0.0	0.0	1.0	0.0	0.0	0.0	0.0	601.1	sense;	TTLMASLMTLTELCRTLSKDKIPLSNTFDGKHHPIRSN	38	3
719	TLSKDKIPLSNTFDGK	601	16	embryo	3.7854	0	False	EBZ_601.1_sets_embryo.dev-embryo	0.0	0.0	1.0	0.0	0.0	0.0	0.0	601.1	sense;	TTLMASLMTLTELCRTLSKDKIPLSNTFDGKHHPIRSN	38	3
720	TTLMASLMTLTELCR	601	15	embryo.PL	0.15415	0	False	EBZ_601.1_sets_embryo.dev-embryo	0.0	0.0	1.0	0.0	0.0	0.0	0.0	601.1	sense;	TTLMASLMTLTELCRTLSKDKIPLSNTFDGKHHPIRSN	38	3
721	NLLDCYLKMVEYK	602	13	embryo.dev-embryo	0.013287	0	False	EBZ_602.1_sets_embryo	0.0	1.0	0.0	0.0	0.0	0.0	0.0	602.1	antisense;	NLLDCYLKMVEYKVI	15	8
722	NLLDCYLK	602	8	dev-embryo	0.39653	0	False	EBZ_602.1_sets_embryo	0.0	1.0	0.0	0.0	0.0	0.0	0.0	602.1	antisense;	NLLDCYLKMVEYKVI	15	8
723	ECQFFWVIPER	603	11	embryo.dev-embryo.PL	0.13948	0	False	EBZ_603.1_sets_embryo	0.0	0.0	1.0	0.0	1.0	0.0	0.0	603.1	sense;intronic;	GAHSLTFPECHLRFSAVKVPVVAVSHRECQFFWVIPERWPLLRSAVHVKFKCVHCSNPDHSHHPP	65	-1
724	ECQFFWVIPERWPLLR	603	16	embryo	0.17003	0	False	EBZ_603.1_sets_embryo	0.0	0.0	1.0	0.0	1.0	0.0	0.0	603.1	sense;intronic;	GAHSLTFPECHLRFSAVKVPVVAVSHRECQFFWVIPERWPLLRSAVHVKFKCVHCSNPDHSHHPP	65	-1
725	GAHSLTFPECHLR	603	13	embryo	0.001473	0	False	EBZ_603.1_sets_embryo	0.0	0.0	1.0	0.0	1.0	0.0	0.0	603.1	sense;intronic;	GAHSLTFPECHLRFSAVKVPVVAVSHRECQFFWVIPERWPLLRSAVHVKFKCVHCSNPDHSHHPP	65	-1
726	GAHSLTFPECHLRFSAVK	603	18	embryo	1.0767	0	False	EBZ_603.1_sets_embryo	0.0	0.0	1.0	0.0	1.0	0.0	0.0	603.1	sense;intronic;	GAHSLTFPECHLRFSAVKVPVVAVSHRECQFFWVIPERWPLLRSAVHVKFKCVHCSNPDHSHHPP	65	-1
727	VPVVAVSHR	603	9	embryo	0.16046	0	False	EBZ_603.1_sets_embryo	0.0	0.0	1.0	0.0	1.0	0.0	0.0	603.1	sense;intronic;	GAHSLTFPECHLRFSAVKVPVVAVSHRECQFFWVIPERWPLLRSAVHVKFKCVHCSNPDHSHHPP	65	-1
728	WPLLRSAVHVK	603	11	embryo	0.20103	0	False	EBZ_603.1_sets_embryo	0.0	0.0	1.0	0.0	1.0	0.0	0.0	603.1	sense;intronic;	GAHSLTFPECHLRFSAVKVPVVAVSHRECQFFWVIPERWPLLRSAVHVKFKCVHCSNPDHSHHPP	65	-1
729	VPVVAVSHRECQFFWVIPERWPLLR	603	25	PL	0.14756	0	False	EBZ_603.1_sets_embryo	0.0	0.0	1.0	0.0	1.0	0.0	0.0	603.1	sense;intronic;	GAHSLTFPECHLRFSAVKVPVVAVSHRECQFFWVIPERWPLLRSAVHVKFKCVHCSNPDHSHHPP	65	-1
730	IYYGCYLLLMITK	616	13	embryo.dev-embryo.PL	0.00084036	0	False	EBZ_616.1_sets_embryo	0.0	0.0	1.0	0.0	1.0	0.0	0.0	616.1	sense;intronic;	KIYYGCYLLLMITKK	15	10
731	VGRQHEAYAQYG	619	12	embryo	1.1087	0	False	EBZ_619.1_sets_PL.embryo	0.0	1.0	0.0	0.0	0.0	0.0	0.0	619.1	antisense;	YFILLDILNCFLIRVGRQHEAYAQYG	26	-1
732	YFILLDILNCFLIR	619	14	dev-adult.embryo.PL	0.00026554	0	False	EBZ_619.1_sets_PL.embryo	0.0	1.0	0.0	0.0	0.0	0.0	0.0	619.1	antisense;	YFILLDILNCFLIRVGRQHEAYAQYG	26	-1
733	LGPIFLEPSDHYFFELK	620	17	embryo	0.15365	0	False	EBZ_620.1_sets_embryo	0.0	2.0	2.0	0.0	2.0	0.0	0.0	620.1	antisense;sense;intronic;	NFRYFVDELSFQSFLNTRAAKKKLVIFGRANKLGPIFLEPSDHYFFELKEKTNFIQVPPRFELGSQDSES	70	-1
734	LGPIFLEPSDHYFFELKEK	620	19	embryo	0.18564	0	False	EBZ_620.1_sets_embryo	0.0	2.0	2.0	0.0	2.0	0.0	0.0	620.1	antisense;sense;intronic;	NFRYFVDELSFQSFLNTRAAKKKLVIFGRANKLGPIFLEPSDHYFFELKEKTNFIQVPPRFELGSQDSES	70	-1
735	YFVDELSFQSFLNTR	620	15	embryo	0.0037169	0	False	EBZ_620.1_sets_embryo	0.0	2.0	2.0	0.0	2.0	0.0	0.0	620.1	antisense;sense;intronic;	NFRYFVDELSFQSFLNTRAAKKKLVIFGRANKLGPIFLEPSDHYFFELKEKTNFIQVPPRFELGSQDSES	70	-1
736	QFIANFSCQK	628	10	dev-adult.embryo.PL	0.00036094	0	False	EBZ_628.1_sets_embryo	0.0	0.0	1.0	0.0	1.0	0.0	0.0	628.1	sense;intronic;	SADMQVWHSERQFIANFSCQKLGHFIKKQRHQHCQQNYFECQ	42	3
737	HQHCQQNYFECQ	628	12	PL	0.14513	0	False	EBZ_628.1_sets_embryo	0.0	0.0	1.0	0.0	1.0	0.0	0.0	628.1	sense;intronic;	SADMQVWHSERQFIANFSCQKLGHFIKKQRHQHCQQNYFECQ	42	3
738	QRHQHCQQNYFECQ	628	14	PL	0.20932	0	False	EBZ_628.1_sets_embryo	0.0	0.0	1.0	0.0	1.0	0.0	0.0	628.1	sense;intronic;	SADMQVWHSERQFIANFSCQKLGHFIKKQRHQHCQQNYFECQ	42	3
739	CLHLGVLLSER	630	11	embryo	0.17477	0	False	EBZ_630.1_sets_embryo	0.0	1.0	0.0	0.0	0.0	0.0	0.0	630.1	antisense;	VAAGCRGPGFRCLHLGVLLSERRSRQIVGIDLRSIFLLRQPDDTASAHDLNWRHFILADEAVDIDELHGTRGCHGRTSSFFH	82	-1
740	CLHLGVLLSERR	630	12	embryo.dev-embryo	0.010048	0	False	EBZ_630.1_sets_embryo	0.0	1.0	0.0	0.0	0.0	0.0	0.0	630.1	antisense;	VAAGCRGPGFRCLHLGVLLSERRSRQIVGIDLRSIFLLRQPDDTASAHDLNWRHFILADEAVDIDELHGTRGCHGRTSSFFH	82	-1
741	CLHLGVLLSERRSR	630	14	embryo	2.8941	0	False	EBZ_630.1_sets_embryo	0.0	1.0	0.0	0.0	0.0	0.0	0.0	630.1	antisense;	VAAGCRGPGFRCLHLGVLLSERRSRQIVGIDLRSIFLLRQPDDTASAHDLNWRHFILADEAVDIDELHGTRGCHGRTSSFFH	82	-1
742	QIVGIDLR	630	8	embryo.dev-embryo	0.026718	0	False	EBZ_630.1_sets_embryo	0.0	1.0	0.0	0.0	0.0	0.0	0.0	630.1	antisense;	VAAGCRGPGFRCLHLGVLLSERRSRQIVGIDLRSIFLLRQPDDTASAHDLNWRHFILADEAVDIDELHGTRGCHGRTSSFFH	82	-1
743	RSRQIVGIDLR	630	11	embryo	0.33827	0	False	EBZ_630.1_sets_embryo	0.0	1.0	0.0	0.0	0.0	0.0	0.0	630.1	antisense;	VAAGCRGPGFRCLHLGVLLSERRSRQIVGIDLRSIFLLRQPDDTASAHDLNWRHFILADEAVDIDELHGTRGCHGRTSSFFH	82	-1
744	TMETVLANNMDLVERRQK	633	18	embryo	0.0057575000000000005	0	False	EBZ_633.1_sets_embryo	1.0	0.0	0.0	0.0	0.0	0.0	0.0	633.1	intergenic;	TMETVLANNMDLVERRQKPMYTQSCQLEGIFLVMVKF	37	1
745	AEFVFMASLMK	636	11	embryo	0.45534	0	False	EBZ_636.1_sets_embryo	0.0	1.0	0.0	0.0	0.0	0.0	0.0	636.1	antisense;	SLRAKRRANFLPAQRTKWKKAEFVFMASLMKIKVN	35	25
746	KAEFVFMASLMK	636	12	embryo.dev-adult	0.00063622	0	False	EBZ_636.1_sets_embryo	0.0	1.0	0.0	0.0	0.0	0.0	0.0	636.1	antisense;	SLRAKRRANFLPAQRTKWKKAEFVFMASLMKIKVN	35	25
747	RRANFLPAQR	636	10	embryo	0.36222	0	False	EBZ_636.1_sets_embryo	0.0	1.0	0.0	0.0	0.0	0.0	0.0	636.1	antisense;	SLRAKRRANFLPAQRTKWKKAEFVFMASLMKIKVN	35	25
748	TICLADFEVK	638	10	dev-adult.embryo.PL	0.0041089	0	False	EBZ_638.1_sets_embryo	0.0	0.0	1.0	0.0	1.0	0.0	0.0	638.1	sense;intronic;	TMHFGKTICLADFEVKTAPRCFSFIAG	27	1
749	TICLADFEVKTAPR	638	14	embryo	0.11162	0	False	EBZ_638.1_sets_embryo	0.0	0.0	1.0	0.0	1.0	0.0	0.0	638.1	sense;intronic;	TMHFGKTICLADFEVKTAPRCFSFIAG	27	1
750	TICLADFEVKTAPRCFSFIAG	638	21	embryo	0.41326	0	False	EBZ_638.1_sets_embryo	0.0	0.0	1.0	0.0	1.0	0.0	0.0	638.1	sense;intronic;	TMHFGKTICLADFEVKTAPRCFSFIAG	27	1
751	AAVTAIADGNEGSAGAEKPFYGLSVSGR	642	28	embryo.PL	0.14309000000000002	0	False	EBZ_642.1_sets_embryo	1.0	0.0	0.0	0.0	0.0	0.0	0.0	642.1	intergenic;	KAAVTAIADGNEGSAGAEKPFYGLSVSGRK	30	-1
752	KAAVTAIADGNEGSAGAEK	642	19	embryo	0.00015166	0	False	EBZ_642.1_sets_embryo	1.0	0.0	0.0	0.0	0.0	0.0	0.0	642.1	intergenic;	KAAVTAIADGNEGSAGAEKPFYGLSVSGRK	30	-1
753	PFYGLSVSGR	642	10	embryo	0.40588	0	False	EBZ_642.1_sets_embryo	1.0	0.0	0.0	0.0	0.0	0.0	0.0	642.1	intergenic;	KAAVTAIADGNEGSAGAEKPFYGLSVSGRK	30	-1
754	LGIYSALTGPSGDPCARK	645	18	embryo.dev-embryo	0.008148	0	False	EBZ_645.1_sets_embryo	0.0	0.0	1.0	1.0	0.0	0.0	0.0	645.1	sense;exonic;	LGIYSALTGPSGDPCARKCPPPLPQLR	27	-1
755	DKRSDCVIGAVADHR	646	15	embryo	0.020513	0	False	EBZ_646.1_sets_embryo	1.0	0.0	0.0	0.0	0.0	0.0	0.0	646.1	intergenic;	LRQKTFGLTRDKRSDCVIGAVADHRPT	27	-1
756	LRQKTFGLTR	646	10	embryo	0.35841	0	False	EBZ_646.1_sets_embryo	1.0	0.0	0.0	0.0	0.0	0.0	0.0	646.1	intergenic;	LRQKTFGLTRDKRSDCVIGAVADHRPT	27	-1
757	QKTFGLTR	646	8	embryo	0.19423	0	False	EBZ_646.1_sets_embryo	1.0	0.0	0.0	0.0	0.0	0.0	0.0	646.1	intergenic;	LRQKTFGLTRDKRSDCVIGAVADHRPT	27	-1
758	RSDCVIGAVADHR	646	13	embryo.dev-embryo	2.6094e-05	0	False	EBZ_646.1_sets_embryo	1.0	0.0	0.0	0.0	0.0	0.0	0.0	646.1	intergenic;	LRQKTFGLTRDKRSDCVIGAVADHRPT	27	-1
759	SDCVIGAVADHR	646	12	embryo	0.14642	0	False	EBZ_646.1_sets_embryo	1.0	0.0	0.0	0.0	0.0	0.0	0.0	646.1	intergenic;	LRQKTFGLTRDKRSDCVIGAVADHRPT	27	-1
760	FVNIMMLYLYALTH	649	14	embryo	0.0063643	0	False	EBZ_649.1_sets_embryo	0.0	0.0	1.0	0.0	1.0	0.0	0.0	649.1	sense;intronic;	VCGFCHKFVNIMMLYLYALTH	21	11
761	SNLEMVPQHTCSNR	654	14	embryo	4.4419e-05	0	False	EBZ_654.1_sets_embryo	0.0	1.0	0.0	0.0	0.0	0.0	0.0	654.1	antisense;	SNLEMVPQHTCSNRTYVSSALCWMSWPPG	29	4
762	EFLMIYVRI	657	9	embryo.dev-embryo	0.0018927	0	False	EBZ_657.1_sets_embryo	0.0	1.0	0.0	0.0	0.0	0.0	0.0	657.1	antisense;	NANISYFKEFLMIYVRI	17	11
763	VELLVSEKVNPMK	658	13	dev-adult.embryo.PL	0.00095123	0	False	EBZ_658.1_sets_PL.embryo	0.0	1.0	0.0	0.0	0.0	0.0	0.0	658.1	antisense;	TESTGVSELLLGRMANWGLLMVSKVSSPKPELWFFFESKVELLVSEKVNPMKGK	54	13
764	VNPMKGK	658	7	embryo.PL	1.1433	0	False	EBZ_658.1_sets_PL.embryo	0.0	1.0	0.0	0.0	0.0	0.0	0.0	658.1	antisense;	TESTGVSELLLGRMANWGLLMVSKVSSPKPELWFFFESKVELLVSEKVNPMKGK	54	13
765	MANWGLLMVSKVSSPK	658	16	PL	0.97204	0	False	EBZ_658.1_sets_PL.embryo	0.0	1.0	0.0	0.0	0.0	0.0	0.0	658.1	antisense;	TESTGVSELLLGRMANWGLLMVSKVSSPKPELWFFFESKVELLVSEKVNPMKGK	54	13
766	PELWFFFESK	658	10	dev-adult.PL	0.090258	0	False	EBZ_658.1_sets_PL.embryo	0.0	1.0	0.0	0.0	0.0	0.0	0.0	658.1	antisense;	TESTGVSELLLGRMANWGLLMVSKVSSPKPELWFFFESKVELLVSEKVNPMKGK	54	13
767	MANWGLLMVSK	658	11	dev-adult	0.36796	0	False	EBZ_658.1_sets_PL.embryo	0.0	1.0	0.0	0.0	0.0	0.0	0.0	658.1	antisense;	TESTGVSELLLGRMANWGLLMVSKVSSPKPELWFFFESKVELLVSEKVNPMKGK	54	13
768	ASQFSGMRVTR	662	11	dev-adult.embryo.dev-embryo.PL	0.0013995999999999998	0	False	EBZ_662.1_sets_embryo.dev-embryo	0.0	0.0	1.0	0.0	1.0	0.0	0.0	662.1	sense;intronic;	ASQFSGMRVTRASPPVNKVLMEPWQ	25	6
769	VLMEPWQ	662	7	embryo	2.5706	0	False	EBZ_662.1_sets_embryo.dev-embryo	0.0	0.0	1.0	0.0	1.0	0.0	0.0	662.1	sense;intronic;	ASQFSGMRVTRASPPVNKVLMEPWQ	25	6
770	VTRASPPVNKVLMEPWQ	662	17	PL	0.35815	0	False	EBZ_662.1_sets_embryo.dev-embryo	0.0	0.0	1.0	0.0	1.0	0.0	0.0	662.1	sense;intronic;	ASQFSGMRVTRASPPVNKVLMEPWQ	25	6
771	VEQPYKSGWASGFK	665	14	embryo	0.006213499999999999	0	False	EBZ_665.1_sets_embryo	0.0	0.0	1.0	0.0	1.0	0.0	0.0	665.1	sense;intronic;	VEQPYKSGWASGFKGMWVLCL	21	15
772	CFASLIFHLSSNGGGIIRCLIGTCR	669	25	embryo	0.21116	0	False	EBZ_669.1_sets_PL.embryo.dev-embryo	1.0	0.0	0.0	0.0	0.0	0.0	0.0	669.1	intergenic;	RIGQLNTSFTFNYRLKDKIDKLHQGCRVLRNRGQKQAKSAPADKSLYYGQEMKSFRLAVGGVEVEIITRRLNVLICGKCFASLIFHLSSNGGGIIRCLIGTCRAIYMLYKC	111	51
773	IDKLHQGCR	669	9	embryo.PL	0.19562	0	False	EBZ_669.1_sets_PL.embryo.dev-embryo	1.0	0.0	0.0	0.0	0.0	0.0	0.0	669.1	intergenic;	RIGQLNTSFTFNYRLKDKIDKLHQGCRVLRNRGQKQAKSAPADKSLYYGQEMKSFRLAVGGVEVEIITRRLNVLICGKCFASLIFHLSSNGGGIIRCLIGTCRAIYMLYKC	111	51
774	IDKLHQGCRVLR	669	12	embryo	2.8502	0	False	EBZ_669.1_sets_PL.embryo.dev-embryo	1.0	0.0	0.0	0.0	0.0	0.0	0.0	669.1	intergenic;	RIGQLNTSFTFNYRLKDKIDKLHQGCRVLRNRGQKQAKSAPADKSLYYGQEMKSFRLAVGGVEVEIITRRLNVLICGKCFASLIFHLSSNGGGIIRCLIGTCRAIYMLYKC	111	51
775	IGQLNTSFTFNYR	669	13	dev-adult.embryo.PL	6.7207e-05	0	False	EBZ_669.1_sets_PL.embryo.dev-embryo	1.0	0.0	0.0	0.0	0.0	0.0	0.0	669.1	intergenic;	RIGQLNTSFTFNYRLKDKIDKLHQGCRVLRNRGQKQAKSAPADKSLYYGQEMKSFRLAVGGVEVEIITRRLNVLICGKCFASLIFHLSSNGGGIIRCLIGTCRAIYMLYKC	111	51
776	LAVGGVEVEIITR	669	13	embryo	0.18603	0	False	EBZ_669.1_sets_PL.embryo.dev-embryo	1.0	0.0	0.0	0.0	0.0	0.0	0.0	669.1	intergenic;	RIGQLNTSFTFNYRLKDKIDKLHQGCRVLRNRGQKQAKSAPADKSLYYGQEMKSFRLAVGGVEVEIITRRLNVLICGKCFASLIFHLSSNGGGIIRCLIGTCRAIYMLYKC	111	51
777	LAVGGVEVEIITRRLNVLICGK	669	22	embryo.PL	0.22454	0	False	EBZ_669.1_sets_PL.embryo.dev-embryo	1.0	0.0	0.0	0.0	0.0	0.0	0.0	669.1	intergenic;	RIGQLNTSFTFNYRLKDKIDKLHQGCRVLRNRGQKQAKSAPADKSLYYGQEMKSFRLAVGGVEVEIITRRLNVLICGKCFASLIFHLSSNGGGIIRCLIGTCRAIYMLYKC	111	51
778	LHQGCRVLR	669	9	embryo	0.11836	0	False	EBZ_669.1_sets_PL.embryo.dev-embryo	1.0	0.0	0.0	0.0	0.0	0.0	0.0	669.1	intergenic;	RIGQLNTSFTFNYRLKDKIDKLHQGCRVLRNRGQKQAKSAPADKSLYYGQEMKSFRLAVGGVEVEIITRRLNVLICGKCFASLIFHLSSNGGGIIRCLIGTCRAIYMLYKC	111	51
779	RIGQLNTSFTFNYR	669	14	embryo	0.20269	0	False	EBZ_669.1_sets_PL.embryo.dev-embryo	1.0	0.0	0.0	0.0	0.0	0.0	0.0	669.1	intergenic;	RIGQLNTSFTFNYRLKDKIDKLHQGCRVLRNRGQKQAKSAPADKSLYYGQEMKSFRLAVGGVEVEIITRRLNVLICGKCFASLIFHLSSNGGGIIRCLIGTCRAIYMLYKC	111	51
780	RLNVLICGKCFASLIFHLSSNGGGIIR	669	27	embryo	0.43621	0	False	EBZ_669.1_sets_PL.embryo.dev-embryo	1.0	0.0	0.0	0.0	0.0	0.0	0.0	669.1	intergenic;	RIGQLNTSFTFNYRLKDKIDKLHQGCRVLRNRGQKQAKSAPADKSLYYGQEMKSFRLAVGGVEVEIITRRLNVLICGKCFASLIFHLSSNGGGIIRCLIGTCRAIYMLYKC	111	51
781	SAPADKSLYYGQEMK	669	15	embryo	0.079191	0	False	EBZ_669.1_sets_PL.embryo.dev-embryo	1.0	0.0	0.0	0.0	0.0	0.0	0.0	669.1	intergenic;	RIGQLNTSFTFNYRLKDKIDKLHQGCRVLRNRGQKQAKSAPADKSLYYGQEMKSFRLAVGGVEVEIITRRLNVLICGKCFASLIFHLSSNGGGIIRCLIGTCRAIYMLYKC	111	51
782	LNVLICGK	669	8	PL	0.083514	0	False	EBZ_669.1_sets_PL.embryo.dev-embryo	1.0	0.0	0.0	0.0	0.0	0.0	0.0	669.1	intergenic;	RIGQLNTSFTFNYRLKDKIDKLHQGCRVLRNRGQKQAKSAPADKSLYYGQEMKSFRLAVGGVEVEIITRRLNVLICGKCFASLIFHLSSNGGGIIRCLIGTCRAIYMLYKC	111	51
783	AIYMLYK	669	7	dev-adult	0.40347	0	False	EBZ_669.1_sets_PL.embryo.dev-embryo	1.0	0.0	0.0	0.0	0.0	0.0	0.0	669.1	intergenic;	RIGQLNTSFTFNYRLKDKIDKLHQGCRVLRNRGQKQAKSAPADKSLYYGQEMKSFRLAVGGVEVEIITRRLNVLICGKCFASLIFHLSSNGGGIIRCLIGTCRAIYMLYKC	111	51
784	CLIGTCRAIYMLYK	669	14	dev-adult	1.1558	0	False	EBZ_669.1_sets_PL.embryo.dev-embryo	1.0	0.0	0.0	0.0	0.0	0.0	0.0	669.1	intergenic;	RIGQLNTSFTFNYRLKDKIDKLHQGCRVLRNRGQKQAKSAPADKSLYYGQEMKSFRLAVGGVEVEIITRRLNVLICGKCFASLIFHLSSNGGGIIRCLIGTCRAIYMLYKC	111	51
785	VAVSAPNSLCAK	671	12	embryo	0.0053662	0	False	EBZ_671.1_sets_embryo	0.0	1.0	0.0	0.0	0.0	0.0	0.0	671.1	antisense;	VAVSAPNSLCAKLLQQVEQANSKEG	25	-1
786	DQICFWHHWHFDDPNHLQIGWQDTK	676	25	dev-adult.embryo.dev-embryo.PL	0.15458	0	False	EBZ_676.1_sets_PL.embryo	1.0	0.0	0.0	0.0	0.0	0.0	0.0	676.1	intergenic;	GSETRTCHEFILHTLPARDQICFWHHWHFDDPNHLQIGWQDTKLQIIFQLMPKNSIHAPVINEMIT	66	50
787	LQIIFQLMPKNSIHAPVINEMIT	676	23	dev-adult.embryo.dev-embryo.PL	0.00034918	0	False	EBZ_676.1_sets_PL.embryo	1.0	0.0	0.0	0.0	0.0	0.0	0.0	676.1	intergenic;	GSETRTCHEFILHTLPARDQICFWHHWHFDDPNHLQIGWQDTKLQIIFQLMPKNSIHAPVINEMIT	66	50
788	NSIHAPVINEMIT	676	13	PL	0.4674100000000001	0	False	EBZ_676.1_sets_PL.embryo	1.0	0.0	0.0	0.0	0.0	0.0	0.0	676.1	intergenic;	GSETRTCHEFILHTLPARDQICFWHHWHFDDPNHLQIGWQDTKLQIIFQLMPKNSIHAPVINEMIT	66	50
789	IKTIETPTR	683	9	embryo	0.11148	0	False	EBZ_683.1_sets_embryo	0.0	1.0	0.0	0.0	0.0	0.0	0.0	683.1	antisense;	SIVSYVFQNPSRIKTIETPTRQISITNALWALDGHPGAEAWQ	42	-1
790	SIVSYVFQNPSR	683	12	embryo	0.00071461	0	False	EBZ_683.1_sets_embryo	0.0	1.0	0.0	0.0	0.0	0.0	0.0	683.1	antisense;	SIVSYVFQNPSRIKTIETPTRQISITNALWALDGHPGAEAWQ	42	-1
791	SIVSYVFQNPSRIKTIETPTR	683	21	embryo	0.41307	0	False	EBZ_683.1_sets_embryo	0.0	1.0	0.0	0.0	0.0	0.0	0.0	683.1	antisense;	SIVSYVFQNPSRIKTIETPTRQISITNALWALDGHPGAEAWQ	42	-1
792	TIETPTR	683	7	embryo.dev-embryo	0.14488	0	False	EBZ_683.1_sets_embryo	0.0	1.0	0.0	0.0	0.0	0.0	0.0	683.1	antisense;	SIVSYVFQNPSRIKTIETPTRQISITNALWALDGHPGAEAWQ	42	-1
793	LTYTYGTMTAK	687	11	embryo	0.29137	0	False	EBZ_687.1_sets_embryo	0.0	1.0	0.0	0.0	0.0	0.0	0.0	687.1	antisense;	QISSTITPTDNKYQANSLCLASPKRQRLTYTYGTMTAKATHAHTFKVT	48	34
794	LTYTYGTMTAKATHAHTFKVT	687	21	embryo	0.3911	0	False	EBZ_687.1_sets_embryo	0.0	1.0	0.0	0.0	0.0	0.0	0.0	687.1	antisense;	QISSTITPTDNKYQANSLCLASPKRQRLTYTYGTMTAKATHAHTFKVT	48	34
795	QISSTITPTDNK	687	12	embryo	0.41001	0	False	EBZ_687.1_sets_embryo	0.0	1.0	0.0	0.0	0.0	0.0	0.0	687.1	antisense;	QISSTITPTDNKYQANSLCLASPKRQRLTYTYGTMTAKATHAHTFKVT	48	34
796	QISSTITPTDNKYQANSLCLASPK	687	24	dev-adult.embryo.dev-embryo.PL	0.00017596	0	False	EBZ_687.1_sets_embryo	0.0	1.0	0.0	0.0	0.0	0.0	0.0	687.1	antisense;	QISSTITPTDNKYQANSLCLASPKRQRLTYTYGTMTAKATHAHTFKVT	48	34
797	YQANSLCLASPK	687	12	embryo	0.21053	0	False	EBZ_687.1_sets_embryo	0.0	1.0	0.0	0.0	0.0	0.0	0.0	687.1	antisense;	QISSTITPTDNKYQANSLCLASPKRQRLTYTYGTMTAKATHAHTFKVT	48	34
798	VMMVMVLVMR	690	10	embryo.dev-embryo.PL	0.010953	0	False	EBZ_690.1_sets_PL.embryo	0.0	0.0	1.0	1.0	1.0	0.0	0.0	690.1	sense;exonic;intronic;	VMMVMVLVMRLHFKRLLTLAAGSSHTHHNYAPPLTFSLAIYLYPYLERCSTTCICKI	57	1
799	VMMVMVLVMRLHFK	690	14	PL	0.12904000000000002	0	False	EBZ_690.1_sets_PL.embryo	0.0	0.0	1.0	1.0	1.0	0.0	0.0	690.1	sense;exonic;intronic;	VMMVMVLVMRLHFKRLLTLAAGSSHTHHNYAPPLTFSLAIYLYPYLERCSTTCICKI	57	1
800	CSTTCICKI	690	9	dev-embryo	0.54369	0	False	EBZ_690.1_sets_PL.embryo	0.0	0.0	1.0	1.0	1.0	0.0	0.0	690.1	sense;exonic;intronic;	VMMVMVLVMRLHFKRLLTLAAGSSHTHHNYAPPLTFSLAIYLYPYLERCSTTCICKI	57	1
801	ISVNFFNSTR	695	10	embryo	0.15289	0	False	EBZ_695.1_sets_embryo	0.0	1.0	0.0	0.0	0.0	0.0	0.0	695.1	antisense;	KVGLFWSTLVVKYLRLTLACACANTNKISVNFFNSTRTHTLIAMSVRP	48	43
802	THTLIAMSVRP	695	11	embryo	0.0033673	0	False	EBZ_695.1_sets_embryo	0.0	1.0	0.0	0.0	0.0	0.0	0.0	695.1	antisense;	KVGLFWSTLVVKYLRLTLACACANTNKISVNFFNSTRTHTLIAMSVRP	48	43
803	VGLFWSTLVVK	695	11	embryo	0.14425	0	False	EBZ_695.1_sets_embryo	0.0	1.0	0.0	0.0	0.0	0.0	0.0	695.1	antisense;	KVGLFWSTLVVKYLRLTLACACANTNKISVNFFNSTRTHTLIAMSVRP	48	43
804	VGLFWSTLVVKYLRLTLACACANTNK	695	26	embryo	0.35248	0	False	EBZ_695.1_sets_embryo	0.0	1.0	0.0	0.0	0.0	0.0	0.0	695.1	antisense;	KVGLFWSTLVVKYLRLTLACACANTNKISVNFFNSTRTHTLIAMSVRP	48	43
805	FKWHTESLK	697	9	embryo.dev-embryo	0.42714	0	False	EBZ_697.1_sets_embryo.dev-embryo	0.0	1.0	0.0	0.0	0.0	0.0	0.0	697.1	antisense;	NPVSGFLPRQFALTHVLQFPKHFNSSLKQRQHENSGSSVKFKWHTESLKSKHTCDIKNIMSQLLAASRL	69	59
806	FKWHTESLKSK	697	11	embryo.PL	0.12912	0	False	EBZ_697.1_sets_embryo.dev-embryo	0.0	1.0	0.0	0.0	0.0	0.0	0.0	697.1	antisense;	NPVSGFLPRQFALTHVLQFPKHFNSSLKQRQHENSGSSVKFKWHTESLKSKHTCDIKNIMSQLLAASRL	69	59
807	NIMSQLLAASR	697	11	embryo.dev-embryo.PL	5.3995000000000006e-06	0	False	EBZ_697.1_sets_embryo.dev-embryo	0.0	1.0	0.0	0.0	0.0	0.0	0.0	697.1	antisense;	NPVSGFLPRQFALTHVLQFPKHFNSSLKQRQHENSGSSVKFKWHTESLKSKHTCDIKNIMSQLLAASRL	69	59
808	QRQHENSGSSVK	697	12	embryo	1.0279	0	False	EBZ_697.1_sets_embryo.dev-embryo	0.0	1.0	0.0	0.0	0.0	0.0	0.0	697.1	antisense;	NPVSGFLPRQFALTHVLQFPKHFNSSLKQRQHENSGSSVKFKWHTESLKSKHTCDIKNIMSQLLAASRL	69	59
809	SKHTCDIK	697	8	embryo.dev-embryo	0.87728	0	False	EBZ_697.1_sets_embryo.dev-embryo	0.0	1.0	0.0	0.0	0.0	0.0	0.0	697.1	antisense;	NPVSGFLPRQFALTHVLQFPKHFNSSLKQRQHENSGSSVKFKWHTESLKSKHTCDIKNIMSQLLAASRL	69	59
810	SKHTCDIKNIMSQLLAASR	697	19	embryo	0.34843	0	False	EBZ_697.1_sets_embryo.dev-embryo	0.0	1.0	0.0	0.0	0.0	0.0	0.0	697.1	antisense;	NPVSGFLPRQFALTHVLQFPKHFNSSLKQRQHENSGSSVKFKWHTESLKSKHTCDIKNIMSQLLAASRL	69	59
811	WHTESLKSKHTCDIK	697	15	embryo.PL	0.15875	0	False	EBZ_697.1_sets_embryo.dev-embryo	0.0	1.0	0.0	0.0	0.0	0.0	0.0	697.1	antisense;	NPVSGFLPRQFALTHVLQFPKHFNSSLKQRQHENSGSSVKFKWHTESLKSKHTCDIKNIMSQLLAASRL	69	59
812	HTCDIKNIMSQLLAASR	697	17	PL	0.1924	0	False	EBZ_697.1_sets_embryo.dev-embryo	0.0	1.0	0.0	0.0	0.0	0.0	0.0	697.1	antisense;	NPVSGFLPRQFALTHVLQFPKHFNSSLKQRQHENSGSSVKFKWHTESLKSKHTCDIKNIMSQLLAASRL	69	59
813	FSYMLYR	699	7	embryo	0.44128	0	False	EBZ_699.1_sets_embryo.dev-embryo	1.0	0.0	0.0	0.0	0.0	0.0	0.0	699.1	intergenic;	FTLHIIIKKFSYMLYRVLLHNIYSNLAFS	29	12
814	FTLHIIIKKFSYMLYR	699	16	embryo.dev-embryo.dev-adult	0.00041174	0	False	EBZ_699.1_sets_embryo.dev-embryo	1.0	0.0	0.0	0.0	0.0	0.0	0.0	699.1	intergenic;	FTLHIIIKKFSYMLYRVLLHNIYSNLAFS	29	12
815	KFSYMLYR	699	8	dev-adult	0.5202600000000001	0	False	EBZ_699.1_sets_embryo.dev-embryo	1.0	0.0	0.0	0.0	0.0	0.0	0.0	699.1	intergenic;	FTLHIIIKKFSYMLYRVLLHNIYSNLAFS	29	12
816	IEGALLEEGAR	704	11	dev-adult.embryo.PL	0.00045758	0	False	EBZ_704.2_sets_embryo	0.0	1.0	0.0	0.0	0.0	0.0	0.0	704.2	antisense;	CHIYLEARLEIRVYVDGVRPGHENLQERIEGALLEEGARCIVLPLMCTI	49	45
818	LEIRVYVDGVRPGHENLQER	704	20	dev-adult	0.40705	0	False	EBZ_704.2_sets_embryo	0.0	1.0	0.0	0.0	0.0	0.0	0.0	704.2	antisense;	CHIYLEARLEIRVYVDGVRPGHENLQERIEGALLEEGARCIVLPLMCTI	49	45
820	IVSYRSNYYVSNR	706	13	embryo	0.17694	0	False	EBZ_706.1_sets_embryo	1.0	0.0	0.0	0.0	0.0	0.0	0.0	706.1	intergenic;	LGDITMTYVVLVRKIVSYRSNYYVSNRRLAYFGKCFDSRSSFCRDMKELLDIT	53	5
821	LGDITMTYVVLVRKIVSYR	706	19	embryo.dev-embryo	0.012866	0	False	EBZ_706.1_sets_embryo	1.0	0.0	0.0	0.0	0.0	0.0	0.0	706.1	intergenic;	LGDITMTYVVLVRKIVSYRSNYYVSNRRLAYFGKCFDSRSSFCRDMKELLDIT	53	5
822	SNYYVSNR	706	8	embryo	0.4288	0	False	EBZ_706.1_sets_embryo	1.0	0.0	0.0	0.0	0.0	0.0	0.0	706.1	intergenic;	LGDITMTYVVLVRKIVSYRSNYYVSNRRLAYFGKCFDSRSSFCRDMKELLDIT	53	5
823	AHSCEDLIR	709	9	embryo.PL	0.39676	0	False	EBZ_709.1_sets_embryo	0.0	1.0	0.0	0.0	0.0	0.0	0.0	709.1	antisense;	LYIFFMSHLHYKVMFTHQHGFGELAAILGNTGYDQRTYVVPLAVLDQQWLLVVRSVDSKAHSCEDLIRLLFISIKLNAFLEVYC	84	5
824	LYIFFMSHLHYK	709	12	dev-adult.embryo.dev-embryo.PL	0.00031583	0	False	EBZ_709.1_sets_embryo	0.0	1.0	0.0	0.0	0.0	0.0	0.0	709.1	antisense;	LYIFFMSHLHYKVMFTHQHGFGELAAILGNTGYDQRTYVVPLAVLDQQWLLVVRSVDSKAHSCEDLIRLLFISIKLNAFLEVYC	84	5
825	SVDSKAHSCEDLIR	709	14	embryo.PL	0.20852	0	False	EBZ_709.1_sets_embryo	0.0	1.0	0.0	0.0	0.0	0.0	0.0	709.1	antisense;	LYIFFMSHLHYKVMFTHQHGFGELAAILGNTGYDQRTYVVPLAVLDQQWLLVVRSVDSKAHSCEDLIRLLFISIKLNAFLEVYC	84	5
826	VMFTHQHGFGELAAILGNTGYDQR	709	24	dev-adult.PL	0.1668	0	False	EBZ_709.1_sets_embryo	0.0	1.0	0.0	0.0	0.0	0.0	0.0	709.1	antisense;	LYIFFMSHLHYKVMFTHQHGFGELAAILGNTGYDQRTYVVPLAVLDQQWLLVVRSVDSKAHSCEDLIRLLFISIKLNAFLEVYC	84	5
827	LIMYPSIHRK	711	10	embryo	0.010635	0	False	EBZ_711.1_sets_embryo	1.0	0.0	0.0	0.0	0.0	0.0	0.0	711.1	intergenic;	LIMYPSIHRKTHNNIPFN	18	2
828	SILMSWHRCPK	713	11	embryo	0.0056278	0	False	EBZ_713.1_sets_embryo	1.0	0.0	0.0	0.0	0.0	0.0	0.0	713.1	intergenic;	SVSFYWRLIHTASLHRLFFYVIPHFLASVSDTPQRSILMSWHRCPKDNCQALPVIRLLLFVSGCWPHAAAQFLN	74	38
829	SVSFYWRLIHTASLHRLFFYVIPHFLASVSDTPQR	713	35	embryo	0.41162	0	False	EBZ_713.1_sets_embryo	1.0	0.0	0.0	0.0	0.0	0.0	0.0	713.1	intergenic;	SVSFYWRLIHTASLHRLFFYVIPHFLASVSDTPQRSILMSWHRCPKDNCQALPVIRLLLFVSGCWPHAAAQFLN	74	38
830	SQITMRPSLHPTAK	716	14	dev-adult.embryo.dev-embryo.PL	0.0037742	0	False	EBZ_716.1_sets_PL.embryo.dev-embryo	0.0	1.0	0.0	0.0	0.0	0.0	0.0	716.1	antisense;	PFLVQLRLQTGCTWAEIILAMPLVRKSQITMRPSLHPTAKRVPYLLKAHVTANEMQSSEPSNSSG	65	20
831	PFLVQLRLQTGCTWAEIILAMPLVR	716	25	PL	0.2158	0	False	EBZ_716.1_sets_PL.embryo.dev-embryo	0.0	1.0	0.0	0.0	0.0	0.0	0.0	716.1	antisense;	PFLVQLRLQTGCTWAEIILAMPLVRKSQITMRPSLHPTAKRVPYLLKAHVTANEMQSSEPSNSSG	65	20
832	PSLHPTAKRVPYLLK	716	15	dev-embryo.PL	0.12550999999999998	0	False	EBZ_716.1_sets_PL.embryo.dev-embryo	0.0	1.0	0.0	0.0	0.0	0.0	0.0	716.1	antisense;	PFLVQLRLQTGCTWAEIILAMPLVRKSQITMRPSLHPTAKRVPYLLKAHVTANEMQSSEPSNSSG	65	20
833	CAALCSSPLNLSSR	718	14	embryo	0.2489	0	False	EBZ_718.1_sets_embryo	1.0	0.0	0.0	0.0	0.0	0.0	0.0	718.1	intergenic;	PDSMGNLPTCASELFLFAIFEGGKCAALCSSPLNLSSRLSAKWQSENYSLCLRIRAQNRKPTKTERQTERNLERGVTSKWARDCQFP	87	3
834	GVTSKWAR	718	8	embryo.dev-adult	0.17582	0	False	EBZ_718.1_sets_embryo	1.0	0.0	0.0	0.0	0.0	0.0	0.0	718.1	intergenic;	PDSMGNLPTCASELFLFAIFEGGKCAALCSSPLNLSSRLSAKWQSENYSLCLRIRAQNRKPTKTERQTERNLERGVTSKWARDCQFP	87	3
835	GVTSKWARDCQFP	718	13	embryo	0.16663	0	False	EBZ_718.1_sets_embryo	1.0	0.0	0.0	0.0	0.0	0.0	0.0	718.1	intergenic;	PDSMGNLPTCASELFLFAIFEGGKCAALCSSPLNLSSRLSAKWQSENYSLCLRIRAQNRKPTKTERQTERNLERGVTSKWARDCQFP	87	3
836	LSAKWQSENYSLCLRIR	718	17	embryo	0.34005	0	False	EBZ_718.1_sets_embryo	1.0	0.0	0.0	0.0	0.0	0.0	0.0	718.1	intergenic;	PDSMGNLPTCASELFLFAIFEGGKCAALCSSPLNLSSRLSAKWQSENYSLCLRIRAQNRKPTKTERQTERNLERGVTSKWARDCQFP	87	3
837	NLERGVTSK	718	9	embryo	0.21052	0	False	EBZ_718.1_sets_embryo	1.0	0.0	0.0	0.0	0.0	0.0	0.0	718.1	intergenic;	PDSMGNLPTCASELFLFAIFEGGKCAALCSSPLNLSSRLSAKWQSENYSLCLRIRAQNRKPTKTERQTERNLERGVTSKWARDCQFP	87	3
838	QTERNLERGVTSK	718	13	embryo.dev-adult	0.019754	0	False	EBZ_718.1_sets_embryo	1.0	0.0	0.0	0.0	0.0	0.0	0.0	718.1	intergenic;	PDSMGNLPTCASELFLFAIFEGGKCAALCSSPLNLSSRLSAKWQSENYSLCLRIRAQNRKPTKTERQTERNLERGVTSKWARDCQFP	87	3
839	WQSENYSLCLR	718	11	embryo	0.14527	0	False	EBZ_718.1_sets_embryo	1.0	0.0	0.0	0.0	0.0	0.0	0.0	718.1	intergenic;	PDSMGNLPTCASELFLFAIFEGGKCAALCSSPLNLSSRLSAKWQSENYSLCLRIRAQNRKPTKTERQTERNLERGVTSKWARDCQFP	87	3
840	PGLESVGRR	720	9	dev-adult.embryo.dev-embryo.PL	0.016481	0	False	EBZ_720.1_sets_embryo	1.0	0.0	0.0	0.0	0.0	0.0	0.0	720.1	intergenic;	GCRPGLESVGRRRMVYG	17	13
841	ALMGWTTRR	725	9	dev-embryo	0.13993	0	False	EBZ_725.1_sets_embryo	0.0	1.0	0.0	0.0	0.0	0.0	0.0	725.1	antisense;	PPPVCGRSPRSPAWTFWARSVRALMGWTTRRRNLMIQGAASRALISGGCLPRSRRVSCVEAGYRLYLSVGSTAVP	75	24
842	NLMIQGAASR	725	10	dev-embryo	0.017197	0	False	EBZ_725.1_sets_embryo	0.0	1.0	0.0	0.0	0.0	0.0	0.0	725.1	antisense;	PPPVCGRSPRSPAWTFWARSVRALMGWTTRRRNLMIQGAASRALISGGCLPRSRRVSCVEAGYRLYLSVGSTAVP	75	24
843	ACHFTSDQNLDKMQEK	727	16	embryo	0.12503	0	False	EBZ_727.1_sets_embryo	1.0	0.0	0.0	0.0	0.0	0.0	0.0	727.1	intergenic;	FFLFMFNMRRACHFTSDQNLDKMQEKKAATYAK	33	4
844	FFLFMFNMRR	727	10	embryo	0.0056782	0	False	EBZ_727.1_sets_embryo	1.0	0.0	0.0	0.0	0.0	0.0	0.0	727.1	intergenic;	FFLFMFNMRRACHFTSDQNLDKMQEKKAATYAK	33	4
845	GVGSKQQIK	729	9	dev-adult.embryo.dev-embryo.PL	0.003892	0	False	EBZ_729.1_sets_embryo	0.0	1.0	0.0	0.0	0.0	0.0	0.0	729.1	antisense;	GVGSKQQIKQDITYHNCRAYGPALSPDNSNCTPPHWS	37	-1
846	QDITYHNCR	729	9	embryo	0.4252	0	False	EBZ_729.1_sets_embryo	0.0	1.0	0.0	0.0	0.0	0.0	0.0	729.1	antisense;	GVGSKQQIKQDITYHNCRAYGPALSPDNSNCTPPHWS	37	-1
847	QDITYHNCRAYGPALSPDNSNCTPPHWS	729	28	embryo	0.21503000000000005	0	False	EBZ_729.1_sets_embryo	0.0	1.0	0.0	0.0	0.0	0.0	0.0	729.1	antisense;	GVGSKQQIKQDITYHNCRAYGPALSPDNSNCTPPHWS	37	-1
848	EIILGSLTPSNCFFGVAPIL	731	20	dev-adult.embryo.dev-embryo.PL	1.3743e-06	0	False	EBZ_731.1_sets_embryo	0.0	1.0	0.0	0.0	0.0	0.0	0.0	731.1	antisense;	RPNCTFSMFLMTFTFASSFSFWTSLFSLSIVSWRWRSSTLLLALVCNKEIILGSLTPSNCFFGVAPIL	68	7
849	SSTLLLALVCNK	731	12	embryo	0.44295	0	False	EBZ_731.1_sets_embryo	0.0	1.0	0.0	0.0	0.0	0.0	0.0	731.1	antisense;	RPNCTFSMFLMTFTFASSFSFWTSLFSLSIVSWRWRSSTLLLALVCNKEIILGSLTPSNCFFGVAPIL	68	7
850	SSTLLLALVCNKEIILGSLTPSNCFFGVAPIL	731	32	dev-adult	0.13482	0	False	EBZ_731.1_sets_embryo	0.0	1.0	0.0	0.0	0.0	0.0	0.0	731.1	antisense;	RPNCTFSMFLMTFTFASSFSFWTSLFSLSIVSWRWRSSTLLLALVCNKEIILGSLTPSNCFFGVAPIL	68	7
851	KAATHLR	738	7	embryo	0.5676100000000001	0	False	EBZ_738.1_sets_embryo	0.0	0.0	1.0	0.0	1.0	0.0	0.0	738.1	sense;intronic;	RSHSGVPCRWAKMRLKVEKSALFFCWQKMKKAATHLRPKNGDKEGLSKVCREARVSK	57	12
852	SALFFCWQKMK	738	11	embryo	0.18051	0	False	EBZ_738.1_sets_embryo	0.0	0.0	1.0	0.0	1.0	0.0	0.0	738.1	sense;intronic;	RSHSGVPCRWAKMRLKVEKSALFFCWQKMKKAATHLRPKNGDKEGLSKVCREARVSK	57	12
853	VEKSALFFCWQK	738	12	embryo	0.0014323	0	False	EBZ_738.1_sets_embryo	0.0	0.0	1.0	0.0	1.0	0.0	0.0	738.1	sense;intronic;	RSHSGVPCRWAKMRLKVEKSALFFCWQKMKKAATHLRPKNGDKEGLSKVCREARVSK	57	12
854	MPKNLNSTPMNISVKHFN	741	18	dev-adult.embryo.PL	0.0080387	0	False	EBZ_741.1_sets_embryo	0.0	1.0	0.0	0.0	0.0	0.0	0.0	741.1	antisense;	MPKNLNSTPMNISVKHFN	18	0
855	TFNRTLIMLMKTHFECK	745	17	embryo.PL	0.0038925	0	False	EBZ_745.1_sets_PL.embryo	1.0	0.0	0.0	0.0	0.0	0.0	0.0	745.1	intergenic;	TFNRTLIMLMKTHFECKN	18	7
856	TFNRTLIMLMK	745	11	PL	0.19924	0	False	EBZ_745.1_sets_PL.embryo	1.0	0.0	0.0	0.0	0.0	0.0	0.0	745.1	intergenic;	TFNRTLIMLMKTHFECKN	18	7
857	TLIMLMKTHFECKN	745	14	PL	0.17732	0	False	EBZ_745.1_sets_PL.embryo	1.0	0.0	0.0	0.0	0.0	0.0	0.0	745.1	intergenic;	TFNRTLIMLMKTHFECKN	18	7
858	AFSLITFRWR	746	10	embryo	0.12919	0	False	EBZ_746.2_sets_PL.embryo	0.0	0.0	1.0	1.0	1.0	0.0	0.0	746.2	sense;exonic;intronic;	SPQLWFTAIVVARRPWSAIYRTSFCTNKVRRANTPPGLNDSRAFSLITFRWRLAFGRSPISHSEERAGWHL	71	-1
859	AFSLITFRWR	746	10	embryo	0.12919	0	False	EBZ_746.2_sets_PL.embryo	0.0	0.0	1.0	1.0	1.0	0.0	0.0	746.2	sense;exonic;intronic;	RLWRGSHRQRTGGANSGHFRQGGGPLCAQRHHGKSTGNYGSLPSSWHGGPGRRFIAHLSVRTRWRLAFGRSPISHSEERAGWHL	84	-1
860	LAFGRSPISHSEER	746	14	embryo	0.1853	0	False	EBZ_746.1_sets_PL.embryo	0.0	0.0	1.0	1.0	1.0	0.0	0.0	746.1	sense;exonic;intronic;	SPQLWFTAIVVARRPWSAIYRTSFCTNKVRRANTPPGLNDSRAFSLITFRWRLAFGRSPISHSEERAGWHL	71	-1
861	LAFGRSPISHSEER	746	14	embryo	0.1853	0	False	EBZ_746.1_sets_PL.embryo	0.0	0.0	1.0	1.0	1.0	0.0	0.0	746.1	sense;exonic;intronic;	RLWRGSHRQRTGGANSGHFRQGGGPLCAQRHHGKSTGNYGSLPSSWHGGPGRRFIAHLSVRTRWRLAFGRSPISHSEERAGWHL	84	-1
862	LAFGRSPISHSEER	746	14	embryo	0.1853	0	False	EBZ_746.2_sets_PL.embryo	0.0	0.0	1.0	1.0	1.0	0.0	0.0	746.2	sense;exonic;intronic;	SPQLWFTAIVVARRPWSAIYRTSFCTNKVRRANTPPGLNDSRAFSLITFRWRLAFGRSPISHSEERAGWHL	71	-1
863	LAFGRSPISHSEER	746	14	embryo	0.1853	0	False	EBZ_746.2_sets_PL.embryo	0.0	0.0	1.0	1.0	1.0	0.0	0.0	746.2	sense;exonic;intronic;	RLWRGSHRQRTGGANSGHFRQGGGPLCAQRHHGKSTGNYGSLPSSWHGGPGRRFIAHLSVRTRWRLAFGRSPISHSEERAGWHL	84	-1
864	RPWSAIYR	746	8	embryo	0.23345	0	False	EBZ_746.2_sets_PL.embryo	0.0	0.0	1.0	1.0	1.0	0.0	0.0	746.2	sense;exonic;intronic;	SPQLWFTAIVVARRPWSAIYRTSFCTNKVRRANTPPGLNDSRAFSLITFRWRLAFGRSPISHSEERAGWHL	71	-1
865	RPWSAIYR	746	8	embryo	0.23345	0	False	EBZ_746.2_sets_PL.embryo	0.0	0.0	1.0	1.0	1.0	0.0	0.0	746.2	sense;exonic;intronic;	RLWRGSHRQRTGGANSGHFRQGGGPLCAQRHHGKSTGNYGSLPSSWHGGPGRRFIAHLSVRTRWRLAFGRSPISHSEERAGWHL	84	-1
866	SPISHSEERAGWHL	746	14	embryo.dev-embryo.PL	0.0033963	0	False	EBZ_746.1_sets_PL.embryo	0.0	0.0	1.0	1.0	1.0	0.0	0.0	746.1	sense;exonic;intronic;	SPQLWFTAIVVARRPWSAIYRTSFCTNKVRRANTPPGLNDSRAFSLITFRWRLAFGRSPISHSEERAGWHL	71	-1
867	SPISHSEERAGWHL	746	14	embryo.dev-embryo.PL	0.0033963	0	False	EBZ_746.1_sets_PL.embryo	0.0	0.0	1.0	1.0	1.0	0.0	0.0	746.1	sense;exonic;intronic;	RLWRGSHRQRTGGANSGHFRQGGGPLCAQRHHGKSTGNYGSLPSSWHGGPGRRFIAHLSVRTRWRLAFGRSPISHSEERAGWHL	84	-1
868	SPISHSEERAGWHL	746	14	embryo.dev-embryo.PL	0.0033963	0	False	EBZ_746.2_sets_PL.embryo	0.0	0.0	1.0	1.0	1.0	0.0	0.0	746.2	sense;exonic;intronic;	SPQLWFTAIVVARRPWSAIYRTSFCTNKVRRANTPPGLNDSRAFSLITFRWRLAFGRSPISHSEERAGWHL	71	-1
869	SPISHSEERAGWHL	746	14	embryo.dev-embryo.PL	0.0033963	0	False	EBZ_746.2_sets_PL.embryo	0.0	0.0	1.0	1.0	1.0	0.0	0.0	746.2	sense;exonic;intronic;	RLWRGSHRQRTGGANSGHFRQGGGPLCAQRHHGKSTGNYGSLPSSWHGGPGRRFIAHLSVRTRWRLAFGRSPISHSEERAGWHL	84	-1
870	ISATATAAAIATR	752	13	embryo	0.00056109	0	False	EBZ_752.1_sets_embryo	0.0	1.0	0.0	0.0	0.0	0.0	0.0	752.1	antisense;	ISATATAAAIATRLGFHAINALNQF	25	-1
871	LNPQLGFHICR	758	11	embryo	0.00032582	0	False	EBZ_758.1_sets_embryo	0.0	1.0	0.0	0.0	0.0	0.0	0.0	758.1	antisense;	LLLPIQPISLQFKSAAKTPLKLNPQLGFHICRLSLLIIP	39	-1
872	TPLKLNPQLGFHICR	758	15	embryo	0.20379	0	False	EBZ_758.1_sets_embryo	0.0	1.0	0.0	0.0	0.0	0.0	0.0	758.1	antisense;	LLLPIQPISLQFKSAAKTPLKLNPQLGFHICRLSLLIIP	39	-1
873	AITECKNQANGNK	759	13	dev-adult.dev-embryo.PL	0.0018736	0	False	EBZ_759.1_sets_embryo.dev-embryo	1.0	0.0	0.0	0.0	0.0	0.0	0.0	759.1	intergenic;	KMHAVPKDGEIERERFVGRMWQCKVRAITECKNQANGNKN	40	1
874	KMHAVPK	759	7	PL	0.26878	0	False	EBZ_759.1_sets_embryo.dev-embryo	1.0	0.0	0.0	0.0	0.0	0.0	0.0	759.1	intergenic;	KMHAVPKDGEIERERFVGRMWQCKVRAITECKNQANGNKN	40	1
875	IFPDASLYR	764	9	embryo.dev-embryo.PL	0.14433	0	False	EBZ_764.1_sets_embryo	0.0	0.0	1.0	0.0	1.0	0.0	0.0	764.1	sense;intronic;	LAEQQLGVWMISLGANGNWFFRSVRKIFPDASLYRGCFSDSNSDFWYARAARRTCLVTQAG	61	9
876	KIFPDASLYR	764	10	embryo.dev-embryo.PL	0.060136	0	False	EBZ_764.1_sets_embryo	0.0	0.0	1.0	0.0	1.0	0.0	0.0	764.1	sense;intronic;	LAEQQLGVWMISLGANGNWFFRSVRKIFPDASLYRGCFSDSNSDFWYARAARRTCLVTQAG	61	9
877	LAEQQLGVWMISLGANGNWFFR	764	22	embryo.dev-embryo	0.00083018	0	False	EBZ_764.1_sets_embryo	0.0	0.0	1.0	0.0	1.0	0.0	0.0	764.1	sense;intronic;	LAEQQLGVWMISLGANGNWFFRSVRKIFPDASLYRGCFSDSNSDFWYARAARRTCLVTQAG	61	9
878	ATYIVVSPPYIADIYGS	765	17	embryo.dev-embryo	0.0004186	0	False	EBZ_765.1_sets_embryo	1.0	0.0	0.0	0.0	0.0	0.0	0.0	765.1	intergenic;	ICYLSALYFRFSLCILQRYRATYIVVSPPYIADIYGS	37	-1
879	ICYLSALYFRFSLCILQR	765	18	embryo.dev-embryo	0.1958	0	False	EBZ_765.1_sets_embryo	1.0	0.0	0.0	0.0	0.0	0.0	0.0	765.1	intergenic;	ICYLSALYFRFSLCILQRYRATYIVVSPPYIADIYGS	37	-1
880	LFSSPVTGTR	766	10	embryo	0.0020553	0	False	EBZ_766.1_sets_embryo	0.0	0.0	1.0	1.0	1.0	0.0	0.0	766.1	sense;exonic;intronic;	LFSSPVTGTRLLEYPMSRYWNA	22	15
881	LLEYPMSRYWNA	766	12	embryo	1.028	0	False	EBZ_766.1_sets_embryo	0.0	0.0	1.0	1.0	1.0	0.0	0.0	766.1	sense;exonic;intronic;	LFSSPVTGTRLLEYPMSRYWNA	22	15
882	AFSFAGPFSTK	772	11	embryo.dev-embryo.PL	0.00053713	0	False	EBZ_772.1_sets_PL.embryo	1.0	0.0	0.0	0.0	0.0	0.0	0.0	772.1	intergenic;	AFSFAGPFSTKSPVKLVKYAPTAIFEIFVPFGSDFKGDPNSIWAGPPKN	49	-1
883	AFSFAGPFSTKSPVK	772	15	embryo	1.1332	0	False	EBZ_772.1_sets_PL.embryo	1.0	0.0	0.0	0.0	0.0	0.0	0.0	772.1	intergenic;	AFSFAGPFSTKSPVKLVKYAPTAIFEIFVPFGSDFKGDPNSIWAGPPKN	49	-1
884	GDPNSIWAGPPK	772	12	embryo	0.4413	0	False	EBZ_772.1_sets_PL.embryo	1.0	0.0	0.0	0.0	0.0	0.0	0.0	772.1	intergenic;	AFSFAGPFSTKSPVKLVKYAPTAIFEIFVPFGSDFKGDPNSIWAGPPKN	49	-1
885	LLSQIYISL	774	9	embryo.dev-embryo.PL	0.40419	0	False	EBZ_774.1_sets_embryo	0.0	0.0	1.0	0.0	1.0	0.0	0.0	774.1	sense;intronic;	VIEIYFLAMVIKLLSQIYISL	21	8
886	VIEIYFLAMVIK	774	12	dev-adult.embryo.dev-embryo.PL	0.00015489	0	False	EBZ_774.1_sets_embryo	0.0	0.0	1.0	0.0	1.0	0.0	0.0	774.1	sense;intronic;	VIEIYFLAMVIKLLSQIYISL	21	8
887	ISWRSASSWSFLR	778	13	embryo.dev-adult	0.13835999999999998	0	False	EBZ_778.1_sets_PL.embryo.dev-adult	0.0	1.0	0.0	0.0	0.0	0.0	0.0	778.1	antisense;	ISWRSASSWSFLRSMSLCFWTKSLNSWLY	29	14
888	ISWRSASSWSFLRSMSLCFWTK	778	22	dev-adult.embryo.PL	0.00056394	0	False	EBZ_778.1_sets_PL.embryo.dev-adult	0.0	1.0	0.0	0.0	0.0	0.0	0.0	778.1	antisense;	ISWRSASSWSFLRSMSLCFWTKSLNSWLY	29	14
889	SASSWSFLRSMSLCFWTK	778	18	PL	0.20714	0	False	EBZ_778.1_sets_PL.embryo.dev-adult	0.0	1.0	0.0	0.0	0.0	0.0	0.0	778.1	antisense;	ISWRSASSWSFLRSMSLCFWTKSLNSWLY	29	14
890	SLNSWLY	778	7	PL	0.52575	0	False	EBZ_778.1_sets_PL.embryo.dev-adult	0.0	1.0	0.0	0.0	0.0	0.0	0.0	778.1	antisense;	ISWRSASSWSFLRSMSLCFWTKSLNSWLY	29	14
891	AITNQTSQYLFK	779	12	dev-adult.embryo.dev-embryo.PL	0.00041731	0	False	EBZ_779.1_sets_embryo	0.0	0.0	1.0	0.0	1.0	0.0	0.0	779.1	sense;intronic;	AITNQTSQYLFKCSNCYFNCPSRSSYTWQPWPIRT	35	-1
892	SSYTWQPWPIRT	779	12	PL	0.12511	0	False	EBZ_779.1_sets_embryo	0.0	0.0	1.0	0.0	1.0	0.0	0.0	779.1	sense;intronic;	AITNQTSQYLFKCSNCYFNCPSRSSYTWQPWPIRT	35	-1
893	YLHLGFHFPPLLASSLK	782	17	embryo.dev-embryo.PL	0.00054453	0	False	EBZ_782.1_sets_embryo	0.0	0.0	1.0	0.0	1.0	0.0	0.0	782.1	sense;intronic;	YLHLGFHFPPLLASSLKAPLMRL	23	20
894	ETPEAHARLHAK	783	12	embryo	0.0012577	0	False	EBZ_783.1_sets_embryo	1.0	0.0	0.0	0.0	0.0	0.0	0.0	783.1	intergenic;	ETPEAHARLHAKLRNLHVSMHENCL	25	19
895	LRNLHVSMHENCL	783	13	embryo	1.1275	0	False	EBZ_783.1_sets_embryo	1.0	0.0	0.0	0.0	0.0	0.0	0.0	783.1	intergenic;	ETPEAHARLHAKLRNLHVSMHENCL	25	19
896	LLQSGQDLSSDSRR	786	14	embryo	0.1834	0	False	EBZ_786.1_sets_embryo	0.0	0.0	1.0	0.0	1.0	0.0	0.0	786.1	sense;intronic;	CQIMVNSRLLQSGQDLSSDSRRRSPAARNSTGQNPFSKCHSYSFPVRFFFV	51	3
897	LLQSGQDLSSDSRRR	786	15	embryo	0.0025177	0	False	EBZ_786.1_sets_embryo	0.0	0.0	1.0	0.0	1.0	0.0	0.0	786.1	sense;intronic;	CQIMVNSRLLQSGQDLSSDSRRRSPAARNSTGQNPFSKCHSYSFPVRFFFV	51	3
898	TLERYIYIYWENLR	787	14	embryo.PL	0.13915	0	False	EBZ_787.1_sets_embryo	1.0	0.0	0.0	0.0	0.0	0.0	0.0	787.1	intergenic;	TLERYIYIYWENLRITSHLNKMFMGRIDQ	29	21
899	TLERYIYIYWENLRITSHLNK	787	21	embryo.PL	0.13510999999999998	0	False	EBZ_787.1_sets_embryo	1.0	0.0	0.0	0.0	0.0	0.0	0.0	787.1	intergenic;	TLERYIYIYWENLRITSHLNKMFMGRIDQ	29	21
900	YIYIYWENLR	787	10	dev-adult.embryo.PL	0.0039994	0	False	EBZ_787.1_sets_embryo	1.0	0.0	0.0	0.0	0.0	0.0	0.0	787.1	intergenic;	TLERYIYIYWENLRITSHLNKMFMGRIDQ	29	21
901	ITSHLNK	787	7	dev-adult.PL	0.006184	0	False	EBZ_787.1_sets_embryo	1.0	0.0	0.0	0.0	0.0	0.0	0.0	787.1	intergenic;	TLERYIYIYWENLRITSHLNKMFMGRIDQ	29	21
902	RTVQFPPVCACHTGRHLEELPLNCTIK	788	27	embryo	0.0018564	0	False	EBZ_788.1_sets_embryo	1.0	0.0	0.0	0.0	0.0	0.0	0.0	788.1	intergenic;	RTVQFPPVCACHTGRHLEELPLNCTIKIKIKPLNAVAVNATALRPDADLQVFPPPSGLI	59	-1
903	TVQFPPVCACHTGR	788	14	embryo	0.43018	0	False	EBZ_788.1_sets_embryo	1.0	0.0	0.0	0.0	0.0	0.0	0.0	788.1	intergenic;	RTVQFPPVCACHTGRHLEELPLNCTIKIKIKPLNAVAVNATALRPDADLQVFPPPSGLI	59	-1
904	AKEEGPITLK	790	10	embryo.dev-embryo	4.6675e-06	0	False	EBZ_790.1_sets_embryo.dev-embryo	0.0	2.0	0.0	0.0	0.0	0.0	0.0	790.1	antisense;	AKEEGPITLKTPAFIDIPTSC	21	-1
905	AKEEGPITLKTPAFIDIPTSC	790	21	embryo	0.34149	0	False	EBZ_790.1_sets_embryo.dev-embryo	0.0	2.0	0.0	0.0	0.0	0.0	0.0	790.1	antisense;	AKEEGPITLKTPAFIDIPTSC	21	-1
907	IKHEIPTCTLQK	791	12	embryo	0.17715	0	False	EBZ_791.1_sets_embryo.dev-embryo	0.0	3.0	0.0	0.0	0.0	0.0	0.0	791.1	antisense;	MQVLSTQYSCFKYTSKNINKDYCMASKIKHEIPTCTLQKYRKPFYIQYNKTRKKNNKTKKTMNTFLLKITKL	72	0
909	PFYIQYNK	791	8	embryo.PL	0.26112	0	False	EBZ_791.1_sets_embryo.dev-embryo	0.0	3.0	0.0	0.0	0.0	0.0	0.0	791.1	antisense;	MQVLSTQYSCFKYTSKNINKDYCMASKIKHEIPTCTLQKYRKPFYIQYNKTRKKNNKTKKTMNTFLLKITKL	72	0
911	TKKTMNTFLLK	791	11	embryo.dev-embryo.PL	0.0028006	0	False	EBZ_791.1_sets_embryo.dev-embryo	0.0	3.0	0.0	0.0	0.0	0.0	0.0	791.1	antisense;	MQVLSTQYSCFKYTSKNINKDYCMASKIKHEIPTCTLQKYRKPFYIQYNKTRKKNNKTKKTMNTFLLKITKL	72	0
913	YRKPFYIQYNK	791	11	embryo.PL	0.36335	0	False	EBZ_791.1_sets_embryo.dev-embryo	0.0	3.0	0.0	0.0	0.0	0.0	0.0	791.1	antisense;	MQVLSTQYSCFKYTSKNINKDYCMASKIKHEIPTCTLQKYRKPFYIQYNKTRKKNNKTKKTMNTFLLKITKL	72	0
915	DYCMASKIK	791	9	PL	0.19583	0	False	EBZ_791.1_sets_embryo.dev-embryo	0.0	3.0	0.0	0.0	0.0	0.0	0.0	791.1	antisense;	MQVLSTQYSCFKYTSKNINKDYCMASKIKHEIPTCTLQKYRKPFYIQYNKTRKKNNKTKKTMNTFLLKITKL	72	0
917	HEIPTCTLQK	791	10	PL	0.11723	0	False	EBZ_791.1_sets_embryo.dev-embryo	0.0	3.0	0.0	0.0	0.0	0.0	0.0	791.1	antisense;	MQVLSTQYSCFKYTSKNINKDYCMASKIKHEIPTCTLQKYRKPFYIQYNKTRKKNNKTKKTMNTFLLKITKL	72	0
919	KPFYIQYNKTR	791	11	dev-embryo	3.508	0	False	EBZ_791.1_sets_embryo.dev-embryo	0.0	3.0	0.0	0.0	0.0	0.0	0.0	791.1	antisense;	MQVLSTQYSCFKYTSKNINKDYCMASKIKHEIPTCTLQKYRKPFYIQYNKTRKKNNKTKKTMNTFLLKITKL	72	0
920	IRSMCQRLYIQK	793	12	embryo.dev-embryo.dev-adult	0.0053598	0	False	EBZ_793.1_sets_embryo.dev-embryo	1.0	0.0	0.0	0.0	0.0	0.0	0.0	793.1	intergenic;	TVYQARACTCMLPESTTLYTHRFLHKIRSMCQRLYIQKHPHYVKQRS	47	10
921	SMCQRLYIQKHPHYVK	793	16	embryo	0.40743	0	False	EBZ_793.1_sets_embryo.dev-embryo	1.0	0.0	0.0	0.0	0.0	0.0	0.0	793.1	intergenic;	TVYQARACTCMLPESTTLYTHRFLHKIRSMCQRLYIQKHPHYVKQRS	47	10
922	FLHKIRSMCQR	793	11	dev-adult	0.381	0	False	EBZ_793.1_sets_embryo.dev-embryo	1.0	0.0	0.0	0.0	0.0	0.0	0.0	793.1	intergenic;	TVYQARACTCMLPESTTLYTHRFLHKIRSMCQRLYIQKHPHYVKQRS	47	10
923	IRSMCQR	793	7	dev-adult	1.1762	0	False	EBZ_793.1_sets_embryo.dev-embryo	1.0	0.0	0.0	0.0	0.0	0.0	0.0	793.1	intergenic;	TVYQARACTCMLPESTTLYTHRFLHKIRSMCQRLYIQKHPHYVKQRS	47	10
924	FGLALSDTFFFKMPQNAK	797	18	dev-adult.embryo.PL	0.00046536	0	False	EBZ_797.1_sets_embryo	1.0	0.0	0.0	0.0	0.0	0.0	0.0	797.1	intergenic;	MFGLALSDTFFFKMPQNAKYMFLTFNMSIFGQNSLAKSQCTWPKRSTRHSCKQC	54	0
925	FGLALSDTFFFKMPQNAKYMFLTFNMSIFGQNSLAK	797	36	embryo	0.15741	0	False	EBZ_797.1_sets_embryo	1.0	0.0	0.0	0.0	0.0	0.0	0.0	797.1	intergenic;	MFGLALSDTFFFKMPQNAKYMFLTFNMSIFGQNSLAKSQCTWPKRSTRHSCKQC	54	0
926	SQCTWPKR	797	8	embryo	0.51637	0	False	EBZ_797.1_sets_embryo	1.0	0.0	0.0	0.0	0.0	0.0	0.0	797.1	intergenic;	MFGLALSDTFFFKMPQNAKYMFLTFNMSIFGQNSLAKSQCTWPKRSTRHSCKQC	54	0
927	MPQNAKYMFLTFNMSIFGQNSLAKSQCTWPK	797	31	dev-adult	0.43196	0	False	EBZ_797.1_sets_embryo	1.0	0.0	0.0	0.0	0.0	0.0	0.0	797.1	intergenic;	MFGLALSDTFFFKMPQNAKYMFLTFNMSIFGQNSLAKSQCTWPKRSTRHSCKQC	54	0
928	IIFPGTAQAGK	799	11	embryo	0.36956	0	False	EBZ_799.1_sets_embryo	1.0	0.0	0.0	0.0	0.0	0.0	0.0	799.1	intergenic;	SDEKYAFLRIIFPGTAQAGKVNKFQQIRS	29	-1
929	IIFPGTAQAGKVNK	799	14	embryo	0.0013481	0	False	EBZ_799.1_sets_embryo	1.0	0.0	0.0	0.0	0.0	0.0	0.0	799.1	intergenic;	SDEKYAFLRIIFPGTAQAGKVNKFQQIRS	29	-1
930	SDEKYAFLRIIFPGTAQAGK	799	20	embryo	0.39883	0	False	EBZ_799.1_sets_embryo	1.0	0.0	0.0	0.0	0.0	0.0	0.0	799.1	intergenic;	SDEKYAFLRIIFPGTAQAGKVNKFQQIRS	29	-1
931	QVFDIIAITTMCLLYMPPV	803	19	dev-adult.embryo.PL	0.00093835	0	False	EBZ_803.1_sets_embryo	0.0	1.0	0.0	0.0	0.0	0.0	0.0	803.1	antisense;	QVFDIIAITTMCLLYMPPV	19	10
932	PTNVDLKTR	813	9	embryo.dev-embryo	0.006625	0	False	EBZ_813.1_sets_embryo	0.0	1.0	0.0	0.0	0.0	0.0	0.0	813.1	antisense;	HSQIDNQQTNYKPTNVDLKTRKYIFVFI	28	-1
933	KYIFVFI	813	7	dev-embryo	0.57404	0	False	EBZ_813.1_sets_embryo	0.0	1.0	0.0	0.0	0.0	0.0	0.0	813.1	antisense;	HSQIDNQQTNYKPTNVDLKTRKYIFVFI	28	-1
934	HDFYTLVRPKPTFHSK	814	16	embryo.dev-embryo	0.10018	0	False	EBZ_814.1_sets_embryo	1.0	0.0	0.0	0.0	0.0	0.0	0.0	814.1	intergenic;	RDCVPLDSIAQEQQKLCYNSCMKHDFYTLVRPKPTFHSKPQAWK	44	21
935	PKPTFHSKPQAWK	814	13	embryo	0.36498	0	False	EBZ_814.1_sets_embryo	1.0	0.0	0.0	0.0	0.0	0.0	0.0	814.1	intergenic;	RDCVPLDSIAQEQQKLCYNSCMKHDFYTLVRPKPTFHSKPQAWK	44	21
936	RDCVPLDSIAQEQQK	814	15	embryo.dev-adult	0.0029548	0	False	EBZ_814.1_sets_embryo	1.0	0.0	0.0	0.0	0.0	0.0	0.0	814.1	intergenic;	RDCVPLDSIAQEQQKLCYNSCMKHDFYTLVRPKPTFHSKPQAWK	44	21
937	RDCVPLDSIAQEQQKLCYNSCMK	814	23	embryo	0.16684000000000002	0	False	EBZ_814.1_sets_embryo	1.0	0.0	0.0	0.0	0.0	0.0	0.0	814.1	intergenic;	RDCVPLDSIAQEQQKLCYNSCMKHDFYTLVRPKPTFHSKPQAWK	44	21
938	LCYNSCMKHDFYTLVR	814	16	dev-adult	0.20714	0	False	EBZ_814.1_sets_embryo	1.0	0.0	0.0	0.0	0.0	0.0	0.0	814.1	intergenic;	RDCVPLDSIAQEQQKLCYNSCMKHDFYTLVRPKPTFHSKPQAWK	44	21
939	ECQSILLDGQK	815	11	embryo	0.0019574	0	False	EBZ_815.1_sets_embryo	0.0	1.0	0.0	0.0	0.0	0.0	0.0	815.1	antisense;	RFRLWRQPGSFDICMCIMRGPVGMCLCMASFPHPRECQSILLDGQKSFKVQKQNNRQQNHRHIAFFLKLFCSIFVRFES	79	14
940	GPVGMCLCMASFPHPR	815	16	embryo	0.36472	0	False	EBZ_815.1_sets_embryo	0.0	1.0	0.0	0.0	0.0	0.0	0.0	815.1	antisense;	RFRLWRQPGSFDICMCIMRGPVGMCLCMASFPHPRECQSILLDGQKSFKVQKQNNRQQNHRHIAFFLKLFCSIFVRFES	79	14
941	GPVGMCLCMASFPHPRECQSILLDGQK	815	27	embryo	0.20645	0	False	EBZ_815.1_sets_embryo	0.0	1.0	0.0	0.0	0.0	0.0	0.0	815.1	antisense;	RFRLWRQPGSFDICMCIMRGPVGMCLCMASFPHPRECQSILLDGQKSFKVQKQNNRQQNHRHIAFFLKLFCSIFVRFES	79	14
942	LFCSIFVRFES	815	11	embryo	0.15449000000000002	0	False	EBZ_815.1_sets_embryo	0.0	1.0	0.0	0.0	0.0	0.0	0.0	815.1	antisense;	RFRLWRQPGSFDICMCIMRGPVGMCLCMASFPHPRECQSILLDGQKSFKVQKQNNRQQNHRHIAFFLKLFCSIFVRFES	79	14
943	EICMYDIQSEIK	817	12	embryo	0.0021692	0	False	EBZ_817.1_sets_embryo	1.0	0.0	0.0	0.0	0.0	0.0	0.0	817.1	intergenic;	ETTKPGREICMYDIQSEIKTNPAGLSIS	28	10
944	ETTKPGREICMYDIQSEIK	817	19	embryo	0.14385	0	False	EBZ_817.1_sets_embryo	1.0	0.0	0.0	0.0	0.0	0.0	0.0	817.1	intergenic;	ETTKPGREICMYDIQSEIKTNPAGLSIS	28	10
945	CTVFGSEFYVPSCIFIRKEK	818	20	embryo	0.0027911	0	False	EBZ_818.1_sets_embryo	0.0	1.0	0.0	0.0	0.0	0.0	0.0	818.1	antisense;	CTVFGSEFYVPSCIFIRKEKRVRVEA	26	-1
947	LFICNIYFITINIGQSK	820	17	embryo.dev-embryo.PL	0.0013876	0	False	EBZ_820.1_sets_embryo.dev-embryo	0.0	1.0	0.0	0.0	0.0	0.0	0.0	820.1	antisense;	LFICNIYFITINIGQSKNYRYIDVTGCRTKIRTFTPDKISERFEHLVRCR	50	-1
949	LFICNIYFITINIGQSKNYRYIDVT	820	25	embryo	0.4346600000000001	0	False	EBZ_820.1_sets_embryo.dev-embryo	0.0	1.0	0.0	0.0	0.0	0.0	0.0	820.1	antisense;	LFICNIYFITINIGQSKNYRYIDVTGCRTKIRTFTPDKISERFEHLVRCR	50	-1
950	VYISAMNSLNFK	824	12	embryo.dev-embryo	0.00035039999999999995	0	False	EBZ_824.1_sets_embryo.dev-embryo	1.0	0.0	0.0	0.0	0.0	0.0	0.0	824.1	intergenic;	VYISAMNSLNFKEFLLLAYN	20	5
951	AQNKSPEER	829	9	embryo	0.0021534	0	False	EBZ_829.1_sets_embryo	0.0	1.0	0.0	0.0	0.0	0.0	0.0	829.1	antisense;	KGTKTKKAQNKSPEERCEKHNLLMLIAQHYAKYSHTGSTGEQQQQDNIEWVELVGRIEMENL	62	23
952	HNLLMLIAQHYAK	829	13	embryo	0.13906	0	False	EBZ_829.1_sets_embryo	0.0	1.0	0.0	0.0	0.0	0.0	0.0	829.1	antisense;	KGTKTKKAQNKSPEERCEKHNLLMLIAQHYAKYSHTGSTGEQQQQDNIEWVELVGRIEMENL	62	23
953	ETTTHAHSLEKK	830	12	embryo.dev-embryo	0.13537000000000002	0	False	EBZ_830.1_sets_PL.embryo.dev-adult.dev-embryo	0.0	0.0	1.0	0.0	1.0	0.0	0.0	830.1	sense;intronic;	VAFPLDKPRRAGGLKSPAIKIKLLSPRRKGVVAAGSVTPHPLPPPPLAIPLAPPYSTFAFDCVARETTTHAHSLEKKEENGRKTERQQRVCHTELVTVPPQQLAGVAPKTAELYIHTRISVYICGISFACTCFPSQSNLA	140	-1
954	VAFPLDK	830	7	dev-adult.embryo.dev-embryo.PL	0.17552	0	False	EBZ_830.1_sets_PL.embryo.dev-adult.dev-embryo	0.0	0.0	1.0	0.0	1.0	0.0	0.0	830.1	sense;intronic;	VAFPLDKPRRAGGLKSPAIKIKLLSPRRKGVVAAGSVTPHPLPPPPLAIPLAPPYSTFAFDCVARETTTHAHSLEKKEENGRKTERQQRVCHTELVTVPPQQLAGVAPKTAELYIHTRISVYICGISFACTCFPSQSNLA	140	-1
955	VAFPLDKPRR	830	10	dev-adult.embryo.dev-embryo.PL	0.00061124	0	False	EBZ_830.1_sets_PL.embryo.dev-adult.dev-embryo	0.0	0.0	1.0	0.0	1.0	0.0	0.0	830.1	sense;intronic;	VAFPLDKPRRAGGLKSPAIKIKLLSPRRKGVVAAGSVTPHPLPPPPLAIPLAPPYSTFAFDCVARETTTHAHSLEKKEENGRKTERQQRVCHTELVTVPPQQLAGVAPKTAELYIHTRISVYICGISFACTCFPSQSNLA	140	-1
956	QQRVCHTELVTVPPQQLAGVAPKTAELYIHTR	830	32	PL	0.14478	0	False	EBZ_830.1_sets_PL.embryo.dev-adult.dev-embryo	0.0	0.0	1.0	0.0	1.0	0.0	0.0	830.1	sense;intronic;	VAFPLDKPRRAGGLKSPAIKIKLLSPRRKGVVAAGSVTPHPLPPPPLAIPLAPPYSTFAFDCVARETTTHAHSLEKKEENGRKTERQQRVCHTELVTVPPQQLAGVAPKTAELYIHTRISVYICGISFACTCFPSQSNLA	140	-1
957	VAFPLDKPR	830	9	dev-adult.PL	0.025263	0	False	EBZ_830.1_sets_PL.embryo.dev-adult.dev-embryo	0.0	0.0	1.0	0.0	1.0	0.0	0.0	830.1	sense;intronic;	VAFPLDKPRRAGGLKSPAIKIKLLSPRRKGVVAAGSVTPHPLPPPPLAIPLAPPYSTFAFDCVARETTTHAHSLEKKEENGRKTERQQRVCHTELVTVPPQQLAGVAPKTAELYIHTRISVYICGISFACTCFPSQSNLA	140	-1
958	VCHTELVTVPPQQLAGVAPK	830	20	PL	0.54657	0	False	EBZ_830.1_sets_PL.embryo.dev-adult.dev-embryo	0.0	0.0	1.0	0.0	1.0	0.0	0.0	830.1	sense;intronic;	VAFPLDKPRRAGGLKSPAIKIKLLSPRRKGVVAAGSVTPHPLPPPPLAIPLAPPYSTFAFDCVARETTTHAHSLEKKEENGRKTERQQRVCHTELVTVPPQQLAGVAPKTAELYIHTRISVYICGISFACTCFPSQSNLA	140	-1
959	QQRVCHTELVTVPPQQLAGVAPK	830	23	dev-embryo	0.26792	0	False	EBZ_830.1_sets_PL.embryo.dev-adult.dev-embryo	0.0	0.0	1.0	0.0	1.0	0.0	0.0	830.1	sense;intronic;	VAFPLDKPRRAGGLKSPAIKIKLLSPRRKGVVAAGSVTPHPLPPPPLAIPLAPPYSTFAFDCVARETTTHAHSLEKKEENGRKTERQQRVCHTELVTVPPQQLAGVAPKTAELYIHTRISVYICGISFACTCFPSQSNLA	140	-1
960	LEINKPQNRTQYVSIYILWGHK	834	22	dev-adult.embryo.PL	7.7574e-05	0	False	EBZ_834.1_sets_PL.embryo	0.0	1.0	0.0	0.0	0.0	0.0	0.0	834.1	antisense;	TKLEINKPQNRTQYVSIYILWGHKSRDRGLLKKLN	35	-1
961	PQNRTQYVSIYILWGHKSR	834	19	embryo	0.39286	0	False	EBZ_834.1_sets_PL.embryo	0.0	1.0	0.0	0.0	0.0	0.0	0.0	834.1	antisense;	TKLEINKPQNRTQYVSIYILWGHKSRDRGLLKKLN	35	-1
962	TQYVSIYILWGHK	834	13	dev-adult.PL	0.15947999999999998	0	False	EBZ_834.1_sets_PL.embryo	0.0	1.0	0.0	0.0	0.0	0.0	0.0	834.1	antisense;	TKLEINKPQNRTQYVSIYILWGHKSRDRGLLKKLN	35	-1
963	KKTFYEWLDK	835	10	dev-adult.embryo.dev-embryo.PL	0.0038274	0	False	EBZ_835.1_sets_embryo	0.0	1.0	0.0	0.0	0.0	0.0	0.0	835.1	antisense;	SVTSLINQLFLATKCDTAVSNHMLTLIKKKTFYEWLDK	38	22
964	SVTSLINQLFLATKCDTAVSNHMLTLIKK	835	29	embryo.dev-embryo	0.15932000000000002	0	False	EBZ_835.1_sets_embryo	0.0	1.0	0.0	0.0	0.0	0.0	0.0	835.1	antisense;	SVTSLINQLFLATKCDTAVSNHMLTLIKKKTFYEWLDK	38	22
965	TFYEWLDK	835	8	embryo.PL	0.18878	0	False	EBZ_835.1_sets_embryo	0.0	1.0	0.0	0.0	0.0	0.0	0.0	835.1	antisense;	SVTSLINQLFLATKCDTAVSNHMLTLIKKKTFYEWLDK	38	22
966	GNDLGDLLRLTQSAQGASLYHLLLYRIGHNR	836	31	embryo	0.41493	0	False	EBZ_836.1_sets_embryo	0.0	1.0	0.0	0.0	0.0	0.0	0.0	836.1	antisense;	RLRGGQKGNDLGDLLRLTQSAQGASLYHLLLYRIGHNRYHGRVYVAWQDAVHTDAKLSELLGGHLREGDHARLGGRIVGLAHVVHLGHDA	90	-1
967	IGHNRYHGR	836	9	embryo	0.95154	0	False	EBZ_836.1_sets_embryo	0.0	1.0	0.0	0.0	0.0	0.0	0.0	836.1	antisense;	RLRGGQKGNDLGDLLRLTQSAQGASLYHLLLYRIGHNRYHGRVYVAWQDAVHTDAKLSELLGGHLREGDHARLGGRIVGLAHVVHLGHDA	90	-1
968	IGHNRYHGRVYVAWQDAVHTDAK	836	23	embryo	0.41452	0	False	EBZ_836.1_sets_embryo	0.0	1.0	0.0	0.0	0.0	0.0	0.0	836.1	antisense;	RLRGGQKGNDLGDLLRLTQSAQGASLYHLLLYRIGHNRYHGRVYVAWQDAVHTDAKLSELLGGHLREGDHARLGGRIVGLAHVVHLGHDA	90	-1
969	LRGGQKGNDLGDLLR	836	15	embryo	0.35038	0	False	EBZ_836.1_sets_embryo	0.0	1.0	0.0	0.0	0.0	0.0	0.0	836.1	antisense;	RLRGGQKGNDLGDLLRLTQSAQGASLYHLLLYRIGHNRYHGRVYVAWQDAVHTDAKLSELLGGHLREGDHARLGGRIVGLAHVVHLGHDA	90	-1
970	LSELLGGHLREGDHARLGGR	836	20	embryo.dev-embryo	2.055e-05	0	False	EBZ_836.1_sets_embryo	0.0	1.0	0.0	0.0	0.0	0.0	0.0	836.1	antisense;	RLRGGQKGNDLGDLLRLTQSAQGASLYHLLLYRIGHNRYHGRVYVAWQDAVHTDAKLSELLGGHLREGDHARLGGRIVGLAHVVHLGHDA	90	-1
971	VYVAWQDAVHTDAK	836	14	embryo	0.42853	0	False	EBZ_836.1_sets_embryo	0.0	1.0	0.0	0.0	0.0	0.0	0.0	836.1	antisense;	RLRGGQKGNDLGDLLRLTQSAQGASLYHLLLYRIGHNRYHGRVYVAWQDAVHTDAKLSELLGGHLREGDHARLGGRIVGLAHVVHLGHDA	90	-1
972	ICSFLLHFIVK	842	11	dev-adult.embryo.dev-embryo.PL	0.00080044	0	False	EBZ_842.1_sets_embryo.dev-embryo	0.0	1.0	0.0	0.0	0.0	0.0	0.0	842.1	antisense;	ICSFLLHFIVKKEHTLMSCMLISGTLGTNLHRPANPRTHTQRLRN	45	16
973	ICSFLLHFIVKK	842	12	dev-adult.embryo.dev-embryo.PL	0.00094127	0	False	EBZ_842.1_sets_embryo.dev-embryo	0.0	1.0	0.0	0.0	0.0	0.0	0.0	842.1	antisense;	ICSFLLHFIVKKEHTLMSCMLISGTLGTNLHRPANPRTHTQRLRN	45	16
974	PANPRTHTQR	842	10	PL	1.0006	0	False	EBZ_842.1_sets_embryo.dev-embryo	0.0	1.0	0.0	0.0	0.0	0.0	0.0	842.1	antisense;	ICSFLLHFIVKKEHTLMSCMLISGTLGTNLHRPANPRTHTQRLRN	45	16
975	THTQRLR	842	7	PL	1.0492	0	False	EBZ_842.1_sets_embryo.dev-embryo	0.0	1.0	0.0	0.0	0.0	0.0	0.0	842.1	antisense;	ICSFLLHFIVKKEHTLMSCMLISGTLGTNLHRPANPRTHTQRLRN	45	16
976	FQTGLDLK	854	8	embryo.dev-adult	0.10919	0	False	EBZ_854.1_sets_embryo	1.0	0.0	0.0	0.0	0.0	0.0	0.0	854.1	intergenic;	INRQLIRHSTVTMDAAQTRNRKRFQTGLDLKSVSKLGNHDLLCLMMQMQIACWLSWVVWLRIEFNRME	68	12
977	INRQLIRHSTVTMDAAQTR	854	19	embryo.dev-adult	0.0013629000000000002	0	False	EBZ_854.1_sets_embryo	1.0	0.0	0.0	0.0	0.0	0.0	0.0	854.1	intergenic;	INRQLIRHSTVTMDAAQTRNRKRFQTGLDLKSVSKLGNHDLLCLMMQMQIACWLSWVVWLRIEFNRME	68	12
978	KRFQTGLDLK	854	10	embryo	3.093	0	False	EBZ_854.1_sets_embryo	1.0	0.0	0.0	0.0	0.0	0.0	0.0	854.1	intergenic;	INRQLIRHSTVTMDAAQTRNRKRFQTGLDLKSVSKLGNHDLLCLMMQMQIACWLSWVVWLRIEFNRME	68	12
979	LGNHDLLCLMMQMQIACWLSWVVWLR	854	26	embryo	0.1539	0	False	EBZ_854.1_sets_embryo	1.0	0.0	0.0	0.0	0.0	0.0	0.0	854.1	intergenic;	INRQLIRHSTVTMDAAQTRNRKRFQTGLDLKSVSKLGNHDLLCLMMQMQIACWLSWVVWLRIEFNRME	68	12
980	SVSKLGNHDLLCLMMQMQIACWLSWVVWLR	854	30	embryo.dev-adult	0.14769000000000002	0	False	EBZ_854.1_sets_embryo	1.0	0.0	0.0	0.0	0.0	0.0	0.0	854.1	intergenic;	INRQLIRHSTVTMDAAQTRNRKRFQTGLDLKSVSKLGNHDLLCLMMQMQIACWLSWVVWLRIEFNRME	68	12
981	HSTVTMDAAQTR	854	12	dev-adult	0.27759	0	False	EBZ_854.1_sets_embryo	1.0	0.0	0.0	0.0	0.0	0.0	0.0	854.1	intergenic;	INRQLIRHSTVTMDAAQTRNRKRFQTGLDLKSVSKLGNHDLLCLMMQMQIACWLSWVVWLRIEFNRME	68	12
982	GLPTNRGIYYVPKR	857	14	embryo	0.16172	0	False	EBZ_857.1_sets_embryo	1.0	0.0	0.0	0.0	0.0	0.0	0.0	857.1	intergenic;	KSTTVHWHSHTRGLPTNRGIYYVPKRSDPV	30	-1
983	KSTTVHWHSHTR	857	12	embryo.dev-embryo	0.009440700000000002	0	False	EBZ_857.1_sets_embryo	1.0	0.0	0.0	0.0	0.0	0.0	0.0	857.1	intergenic;	KSTTVHWHSHTRGLPTNRGIYYVPKRSDPV	30	-1
984	KSTTVHWHSHTRGLPTNR	857	18	dev-embryo	0.36576	0	False	EBZ_857.1_sets_embryo	1.0	0.0	0.0	0.0	0.0	0.0	0.0	857.1	intergenic;	KSTTVHWHSHTRGLPTNRGIYYVPKRSDPV	30	-1
985	ACFGPNGSWWAGGPAPR	859	17	embryo	0.16077	0	False	EBZ_859.1_sets_embryo.dev-adult	0.0	1.0	0.0	0.0	0.0	0.0	0.0	859.1	antisense;	NAVIFSRRTNKNSQLAPMYAIFIHTYTRTFKCKPFKACFGPNGSWWAGGPAPRMLFQP	58	17
986	NSQLAPMYAIFIHTYTR	859	17	embryo	0.18463	0	False	EBZ_859.1_sets_embryo.dev-adult	0.0	1.0	0.0	0.0	0.0	0.0	0.0	859.1	antisense;	NAVIFSRRTNKNSQLAPMYAIFIHTYTRTFKCKPFKACFGPNGSWWAGGPAPRMLFQP	58	17
987	NSQLAPMYAIFIHTYTRTFK	859	20	embryo	0.19833	0	False	EBZ_859.1_sets_embryo.dev-adult	0.0	1.0	0.0	0.0	0.0	0.0	0.0	859.1	antisense;	NAVIFSRRTNKNSQLAPMYAIFIHTYTRTFKCKPFKACFGPNGSWWAGGPAPRMLFQP	58	17
988	PFKACFGPNGSWWAGGPAPRMLFQP	859	25	embryo.dev-embryo	0.00063484	0	False	EBZ_859.1_sets_embryo.dev-adult	0.0	1.0	0.0	0.0	0.0	0.0	0.0	859.1	antisense;	NAVIFSRRTNKNSQLAPMYAIFIHTYTRTFKCKPFKACFGPNGSWWAGGPAPRMLFQP	58	17
989	TNKNSQLAPMYAIFIHTYTRTFK	859	23	embryo	0.3935	0	False	EBZ_859.1_sets_embryo.dev-adult	0.0	1.0	0.0	0.0	0.0	0.0	0.0	859.1	antisense;	NAVIFSRRTNKNSQLAPMYAIFIHTYTRTFKCKPFKACFGPNGSWWAGGPAPRMLFQP	58	17
990	NAVIFSRRTNK	859	11	dev-embryo	0.33325	0	False	EBZ_859.1_sets_embryo.dev-adult	0.0	1.0	0.0	0.0	0.0	0.0	0.0	859.1	antisense;	NAVIFSRRTNKNSQLAPMYAIFIHTYTRTFKCKPFKACFGPNGSWWAGGPAPRMLFQP	58	17
991	YASGALGMANPPK	862	13	dev-adult.embryo.dev-embryo.PL	0.00038245	0	False	EBZ_862.1_sets_embryo	0.0	0.0	1.0	1.0	0.0	0.0	0.0	862.1	sense;exonic;	LRIGESLLCCRYASGALGMANPPK	24	18
992	LRIGESLLCCR	862	11	PL	0.88449	0	False	EBZ_862.1_sets_embryo	0.0	0.0	1.0	1.0	0.0	0.0	0.0	862.1	sense;exonic;	LRIGESLLCCRYASGALGMANPPK	24	18
993	VSCSSAKSSVINDPLTRGMSFLVSR	871	25	embryo.dev-adult	0.0017227999999999998	0	False	EBZ_871.1_sets_embryo.dev-adult	1.0	0.0	0.0	0.0	0.0	0.0	0.0	871.1	intergenic;	VSCSSAKSSVINDPLTRGMSFLVSRYPFTASHKYYLIHSQPWHL	44	18
994	FVGHKNQLFSLAQHYAFRAIIIPATPTFCK	874	30	embryo	0.42435	0	False	EBZ_874.1_sets_embryo	0.0	1.0	0.0	0.0	0.0	0.0	0.0	874.1	antisense;	FVGHKNQLFSLAQHYAFRAIIIPATPTFCKSPCHLNGLGLSHIFWRSKRNQIAHIYSGWISISLQLVAESIGECLLPSSGYLLIRIFSLNGKNRKLLENFYTRKAMCQC	109	105
995	IFSLNGK	874	7	embryo.dev-embryo.PL	0.024141	0	False	EBZ_874.1_sets_embryo	0.0	1.0	0.0	0.0	0.0	0.0	0.0	874.1	antisense;	FVGHKNQLFSLAQHYAFRAIIIPATPTFCKSPCHLNGLGLSHIFWRSKRNQIAHIYSGWISISLQLVAESIGECLLPSSGYLLIRIFSLNGKNRKLLENFYTRKAMCQC	109	105
996	LLENFYTR	874	8	embryo	0.41449	0	False	EBZ_874.1_sets_embryo	0.0	1.0	0.0	0.0	0.0	0.0	0.0	874.1	antisense;	FVGHKNQLFSLAQHYAFRAIIIPATPTFCKSPCHLNGLGLSHIFWRSKRNQIAHIYSGWISISLQLVAESIGECLLPSSGYLLIRIFSLNGKNRKLLENFYTRKAMCQC	109	105
997	LLENFYTRK	874	9	embryo.dev-embryo	0.14532	0	False	EBZ_874.1_sets_embryo	0.0	1.0	0.0	0.0	0.0	0.0	0.0	874.1	antisense;	FVGHKNQLFSLAQHYAFRAIIIPATPTFCKSPCHLNGLGLSHIFWRSKRNQIAHIYSGWISISLQLVAESIGECLLPSSGYLLIRIFSLNGKNRKLLENFYTRKAMCQC	109	105
998	NQLFSLAQHYAFR	874	13	embryo.PL	0.0050036	0	False	EBZ_874.1_sets_embryo	0.0	1.0	0.0	0.0	0.0	0.0	0.0	874.1	antisense;	FVGHKNQLFSLAQHYAFRAIIIPATPTFCKSPCHLNGLGLSHIFWRSKRNQIAHIYSGWISISLQLVAESIGECLLPSSGYLLIRIFSLNGKNRKLLENFYTRKAMCQC	109	105
999	NRKLLENFYTR	874	11	embryo	3.7142	0	False	EBZ_874.1_sets_embryo	0.0	1.0	0.0	0.0	0.0	0.0	0.0	874.1	antisense;	FVGHKNQLFSLAQHYAFRAIIIPATPTFCKSPCHLNGLGLSHIFWRSKRNQIAHIYSGWISISLQLVAESIGECLLPSSGYLLIRIFSLNGKNRKLLENFYTRKAMCQC	109	105
1000	IFSLNGKNR	874	9	PL	0.092269	0	False	EBZ_874.1_sets_embryo	0.0	1.0	0.0	0.0	0.0	0.0	0.0	874.1	antisense;	FVGHKNQLFSLAQHYAFRAIIIPATPTFCKSPCHLNGLGLSHIFWRSKRNQIAHIYSGWISISLQLVAESIGECLLPSSGYLLIRIFSLNGKNRKLLENFYTRKAMCQC	109	105
1001	ANEIYLVGDMR	876	11	dev-adult.embryo.dev-embryo.PL	4.9165e-06	0	False	EBZ_876.1_sets_embryo.dev-embryo	0.0	1.0	0.0	0.0	0.0	0.0	0.0	876.1	antisense;	ANEIYLVGDMRRKLAEIRMAKAMKIGWPNELTIYCAIEIFQQNEKDNVYQIVSWAFESIMLVGILRQ	67	9
1002	ANEIYLVGDMRR	876	12	embryo	0.22994	0	False	EBZ_876.1_sets_embryo.dev-embryo	0.0	1.0	0.0	0.0	0.0	0.0	0.0	876.1	antisense;	ANEIYLVGDMRRKLAEIRMAKAMKIGWPNELTIYCAIEIFQQNEKDNVYQIVSWAFESIMLVGILRQ	67	9
1003	DNVYQIVSWAFESIMLVGILRQ	876	22	embryo	0.13426	0	False	EBZ_876.1_sets_embryo.dev-embryo	0.0	1.0	0.0	0.0	0.0	0.0	0.0	876.1	antisense;	ANEIYLVGDMRRKLAEIRMAKAMKIGWPNELTIYCAIEIFQQNEKDNVYQIVSWAFESIMLVGILRQ	67	9
1004	IGWPNELTIYCAIEIFQQNEK	876	21	PL	0.12025	0	False	EBZ_876.1_sets_embryo.dev-embryo	0.0	1.0	0.0	0.0	0.0	0.0	0.0	876.1	antisense;	ANEIYLVGDMRRKLAEIRMAKAMKIGWPNELTIYCAIEIFQQNEKDNVYQIVSWAFESIMLVGILRQ	67	9
1005	GFIASLLSR	878	9	embryo	0.18222	0	False	EBZ_878.1_sets_embryo	0.0	1.0	0.0	0.0	0.0	0.0	0.0	878.1	antisense;	GIKCRKASPNKPPEAKARSTLRRGFIASLLSRGMIYSSTKGAALIRRVEPIECNQMVLISIRNLGQLGHFKSGSSLITQIRLCLGVPFIVP	91	33
1006	RGFIASLLSR	878	10	embryo	0.21784	0	False	EBZ_878.1_sets_embryo	0.0	1.0	0.0	0.0	0.0	0.0	0.0	878.1	antisense;	GIKCRKASPNKPPEAKARSTLRRGFIASLLSRGMIYSSTKGAALIRRVEPIECNQMVLISIRNLGQLGHFKSGSSLITQIRLCLGVPFIVP	91	33
1007	SGSSLITQIR	878	10	embryo.dev-embryo.dev-adult	0.00020444	0	False	EBZ_878.1_sets_embryo	0.0	1.0	0.0	0.0	0.0	0.0	0.0	878.1	antisense;	GIKCRKASPNKPPEAKARSTLRRGFIASLLSRGMIYSSTKGAALIRRVEPIECNQMVLISIRNLGQLGHFKSGSSLITQIRLCLGVPFIVP	91	33
1008	RVEPIECNQMVLISIR	878	16	dev-adult	0.12443	0	False	EBZ_878.1_sets_embryo	0.0	1.0	0.0	0.0	0.0	0.0	0.0	878.1	antisense;	GIKCRKASPNKPPEAKARSTLRRGFIASLLSRGMIYSSTKGAALIRRVEPIECNQMVLISIRNLGQLGHFKSGSSLITQIRLCLGVPFIVP	91	33
1009	GFIASLLSRGMIYSSTK	878	17	dev-embryo	0.8606600000000001	0	False	EBZ_878.1_sets_embryo	0.0	1.0	0.0	0.0	0.0	0.0	0.0	878.1	antisense;	GIKCRKASPNKPPEAKARSTLRRGFIASLLSRGMIYSSTKGAALIRRVEPIECNQMVLISIRNLGQLGHFKSGSSLITQIRLCLGVPFIVP	91	33
1010	KASPNKPPEAK	878	11	dev-embryo	1.6291	0	False	EBZ_878.1_sets_embryo	0.0	1.0	0.0	0.0	0.0	0.0	0.0	878.1	antisense;	GIKCRKASPNKPPEAKARSTLRRGFIASLLSRGMIYSSTKGAALIRRVEPIECNQMVLISIRNLGQLGHFKSGSSLITQIRLCLGVPFIVP	91	33
1011	LLMHPIAILNRAICQQK	881	17	embryo.dev-embryo	0.006865100000000001	0	False	EBZ_881.1_sets_embryo.dev-embryo	1.0	0.0	0.0	0.0	0.0	0.0	0.0	881.1	intergenic;	MKLLMHPIAILNRAICQQKMFA	22	0
1012	ATETQQHSQAHNNNHR	885	16	embryo	0.15697	0	False	EBZ_885.1_sets_embryo	0.0	0.0	1.0	1.0	1.0	0.0	0.0	885.1	sense;exonic;intronic;	ELIFDTRLKYDKPNVKGSLIKEMFHINNSLPLNNLKITPLKLFTNACSASFHSTTQRHRQSGHLGGHQCQRSGDPRPGQAAEDHKATETQQHSQAHNNNHRSSDNHSENHRGTSEQYRISLIYIILHGSGQ	131	22
1013	ATETQQHSQAHNNNHRSSDNHSENHR	885	26	embryo	0.14149	0	False	EBZ_885.1_sets_embryo	0.0	0.0	1.0	1.0	1.0	0.0	0.0	885.1	sense;exonic;intronic;	ELIFDTRLKYDKPNVKGSLIKEMFHINNSLPLNNLKITPLKLFTNACSASFHSTTQRHRQSGHLGGHQCQRSGDPRPGQAAEDHKATETQQHSQAHNNNHRSSDNHSENHRGTSEQYRISLIYIILHGSGQ	131	22
1014	ELIFDTR	885	7	embryo.dev-adult	0.021661	0	False	EBZ_885.1_sets_embryo	0.0	0.0	1.0	1.0	1.0	0.0	0.0	885.1	sense;exonic;intronic;	ELIFDTRLKYDKPNVKGSLIKEMFHINNSLPLNNLKITPLKLFTNACSASFHSTTQRHRQSGHLGGHQCQRSGDPRPGQAAEDHKATETQQHSQAHNNNHRSSDNHSENHRGTSEQYRISLIYIILHGSGQ	131	22
1015	ELIFDTRLK	885	9	embryo	0.9793	0	False	EBZ_885.1_sets_embryo	0.0	0.0	1.0	1.0	1.0	0.0	0.0	885.1	sense;exonic;intronic;	ELIFDTRLKYDKPNVKGSLIKEMFHINNSLPLNNLKITPLKLFTNACSASFHSTTQRHRQSGHLGGHQCQRSGDPRPGQAAEDHKATETQQHSQAHNNNHRSSDNHSENHRGTSEQYRISLIYIILHGSGQ	131	22
1016	ELIFDTRLKYDK	885	12	embryo.dev-embryo	0.01077	0	False	EBZ_885.1_sets_embryo	0.0	0.0	1.0	1.0	1.0	0.0	0.0	885.1	sense;exonic;intronic;	ELIFDTRLKYDKPNVKGSLIKEMFHINNSLPLNNLKITPLKLFTNACSASFHSTTQRHRQSGHLGGHQCQRSGDPRPGQAAEDHKATETQQHSQAHNNNHRSSDNHSENHRGTSEQYRISLIYIILHGSGQ	131	22
1017	ITPLKLFTNACSASFHSTTQR	885	21	embryo.dev-embryo	0.12704	0	False	EBZ_885.1_sets_embryo	0.0	0.0	1.0	1.0	1.0	0.0	0.0	885.1	sense;exonic;intronic;	ELIFDTRLKYDKPNVKGSLIKEMFHINNSLPLNNLKITPLKLFTNACSASFHSTTQRHRQSGHLGGHQCQRSGDPRPGQAAEDHKATETQQHSQAHNNNHRSSDNHSENHRGTSEQYRISLIYIILHGSGQ	131	22
1018	LFTNACSASFHSTTQRHRQSGHLGGHQCQR	885	30	embryo	0.16449	0	False	EBZ_885.1_sets_embryo	0.0	0.0	1.0	1.0	1.0	0.0	0.0	885.1	sense;exonic;intronic;	ELIFDTRLKYDKPNVKGSLIKEMFHINNSLPLNNLKITPLKLFTNACSASFHSTTQRHRQSGHLGGHQCQRSGDPRPGQAAEDHKATETQQHSQAHNNNHRSSDNHSENHRGTSEQYRISLIYIILHGSGQ	131	22
1019	QSGHLGGHQCQR	885	12	embryo.dev-embryo	0.15371	0	False	EBZ_885.1_sets_embryo	0.0	0.0	1.0	1.0	1.0	0.0	0.0	885.1	sense;exonic;intronic;	ELIFDTRLKYDKPNVKGSLIKEMFHINNSLPLNNLKITPLKLFTNACSASFHSTTQRHRQSGHLGGHQCQRSGDPRPGQAAEDHKATETQQHSQAHNNNHRSSDNHSENHRGTSEQYRISLIYIILHGSGQ	131	22
1020	SSDNHSENHRGTSEQYR	885	17	embryo	0.20677	0	False	EBZ_885.1_sets_embryo	0.0	0.0	1.0	1.0	1.0	0.0	0.0	885.1	sense;exonic;intronic;	ELIFDTRLKYDKPNVKGSLIKEMFHINNSLPLNNLKITPLKLFTNACSASFHSTTQRHRQSGHLGGHQCQRSGDPRPGQAAEDHKATETQQHSQAHNNNHRSSDNHSENHRGTSEQYRISLIYIILHGSGQ	131	22
1021	SGDPRPGQAAEDHK	885	14	dev-embryo	0.70304	0	False	EBZ_885.1_sets_embryo	0.0	0.0	1.0	1.0	1.0	0.0	0.0	885.1	sense;exonic;intronic;	ELIFDTRLKYDKPNVKGSLIKEMFHINNSLPLNNLKITPLKLFTNACSASFHSTTQRHRQSGHLGGHQCQRSGDPRPGQAAEDHKATETQQHSQAHNNNHRSSDNHSENHRGTSEQYRISLIYIILHGSGQ	131	22
1022	SIEISINFFATK	887	12	embryo.dev-embryo	0.00025322	0	False	EBZ_887.1_sets_embryo	0.0	1.0	0.0	0.0	0.0	0.0	0.0	887.1	antisense;	SIEISINFFATKQIIALYKHINLNGNTLHILI	32	-1
1023	QIIALYKHINLNGNTLHILI	887	20	PL	0.12693	0	False	EBZ_887.1_sets_embryo	0.0	1.0	0.0	0.0	0.0	0.0	0.0	887.1	antisense;	SIEISINFFATKQIIALYKHINLNGNTLHILI	32	-1
1024	SIEISINFFATKQIIALYK	887	19	PL	0.21086	0	False	EBZ_887.1_sets_embryo	0.0	1.0	0.0	0.0	0.0	0.0	0.0	887.1	antisense;	SIEISINFFATKQIIALYKHINLNGNTLHILI	32	-1
1025	YILPTILRSGIR	891	12	dev-adult.embryo.dev-embryo.PL	0.0015993	0	False	EBZ_891.1_sets_embryo	0.0	0.0	1.0	0.0	0.0	0.0	1.0	891.1	sense;threeUTR;	YILPTILRSGIRLYHFSPSLANLSQ	25	-1
1026	YILPTILR	891	8	dev-embryo	0.028718	0	False	EBZ_891.1_sets_embryo	0.0	0.0	1.0	0.0	0.0	0.0	1.0	891.1	sense;threeUTR;	YILPTILRSGIRLYHFSPSLANLSQ	25	-1
1027	NFTSTDEKTIFCK	895	13	dev-embryo	0.0022904	0	False	EBZ_895.1_sets_embryo.dev-embryo	1.0	0.0	0.0	0.0	0.0	0.0	0.0	895.1	intergenic;	NFTSTDEKTIFCKKMQLGLQIKLITSDHRER	31	14
1028	NFTSTDEKTIFCKK	895	14	dev-embryo	1.5051	0	False	EBZ_895.1_sets_embryo.dev-embryo	1.0	0.0	0.0	0.0	0.0	0.0	0.0	895.1	intergenic;	NFTSTDEKTIFCKKMQLGLQIKLITSDHRER	31	14
1029	FLQPHKNWNK	900	10	embryo.PL	0.12692	0	False	EBZ_900.1_sets_embryo	1.0	0.0	0.0	0.0	0.0	0.0	0.0	900.1	intergenic;	LSTIAISMHRKAIKHNTKWQQANGNFWRGRVLLIVLDRAAWGQISAKLCPRFLQPHKNWNKFFNRIVPLFMTRSRLCLLHQRHRTFARKLSIYMPRSK	98	7
1030	LSIYMPRSK	900	9	embryo.PL	0.82645	0	False	EBZ_900.1_sets_embryo	1.0	0.0	0.0	0.0	0.0	0.0	0.0	900.1	intergenic;	LSTIAISMHRKAIKHNTKWQQANGNFWRGRVLLIVLDRAAWGQISAKLCPRFLQPHKNWNKFFNRIVPLFMTRSRLCLLHQRHRTFARKLSIYMPRSK	98	7
1031	LSTIAISMHRK	900	11	embryo.PL	6.1448e-05	0	False	EBZ_900.1_sets_embryo	1.0	0.0	0.0	0.0	0.0	0.0	0.0	900.1	intergenic;	LSTIAISMHRKAIKHNTKWQQANGNFWRGRVLLIVLDRAAWGQISAKLCPRFLQPHKNWNKFFNRIVPLFMTRSRLCLLHQRHRTFARKLSIYMPRSK	98	7
1032	KAIKHNTK	900	8	PL	1.6838	0	False	EBZ_900.1_sets_embryo	1.0	0.0	0.0	0.0	0.0	0.0	0.0	900.1	intergenic;	LSTIAISMHRKAIKHNTKWQQANGNFWRGRVLLIVLDRAAWGQISAKLCPRFLQPHKNWNKFFNRIVPLFMTRSRLCLLHQRHRTFARKLSIYMPRSK	98	7
1033	LSIYMPR	900	7	PL	0.51039	0	False	EBZ_900.1_sets_embryo	1.0	0.0	0.0	0.0	0.0	0.0	0.0	900.1	intergenic;	LSTIAISMHRKAIKHNTKWQQANGNFWRGRVLLIVLDRAAWGQISAKLCPRFLQPHKNWNKFFNRIVPLFMTRSRLCLLHQRHRTFARKLSIYMPRSK	98	7
1034	NWNKFFNR	900	8	PL	0.29069	0	False	EBZ_900.1_sets_embryo	1.0	0.0	0.0	0.0	0.0	0.0	0.0	900.1	intergenic;	LSTIAISMHRKAIKHNTKWQQANGNFWRGRVLLIVLDRAAWGQISAKLCPRFLQPHKNWNKFFNRIVPLFMTRSRLCLLHQRHRTFARKLSIYMPRSK	98	7
1035	SRLCLLHQR	900	9	PL	1.0607	0	False	EBZ_900.1_sets_embryo	1.0	0.0	0.0	0.0	0.0	0.0	0.0	900.1	intergenic;	LSTIAISMHRKAIKHNTKWQQANGNFWRGRVLLIVLDRAAWGQISAKLCPRFLQPHKNWNKFFNRIVPLFMTRSRLCLLHQRHRTFARKLSIYMPRSK	98	7
1036	VLLIVLDR	900	8	PL	0.18223	0	False	EBZ_900.1_sets_embryo	1.0	0.0	0.0	0.0	0.0	0.0	0.0	900.1	intergenic;	LSTIAISMHRKAIKHNTKWQQANGNFWRGRVLLIVLDRAAWGQISAKLCPRFLQPHKNWNKFFNRIVPLFMTRSRLCLLHQRHRTFARKLSIYMPRSK	98	7
1037	LVFLLCLHF	903	9	dev-adult.embryo.dev-embryo.PL	0.0013447	0	False	EBZ_903.1_sets_embryo	1.0	0.0	0.0	0.0	0.0	0.0	0.0	903.1	intergenic;	PQLWPNSLHDECVTAASRLGVGRLVFLLCLHF	32	-1
1038	TNLETVFRVMK	905	11	embryo.dev-embryo	0.0024185	0	False	EBZ_905.1_sets_embryo.dev-embryo	0.0	0.0	1.0	1.0	1.0	0.0	0.0	905.1	sense;exonic;intronic;	AYIPPPWQEVCVTSYGKYSEPHAAYIGSKTNLETVFRVMKTFLSYV	46	38
1039	AYIPPPWQEVCVTSYGKYSEPHAAYIGSK	905	29	dev-embryo	0.26914	0	False	EBZ_905.1_sets_embryo.dev-embryo	0.0	0.0	1.0	1.0	1.0	0.0	0.0	905.1	sense;exonic;intronic;	AYIPPPWQEVCVTSYGKYSEPHAAYIGSKTNLETVFRVMKTFLSYV	46	38
1040	LVDLSIIRSCVIPFHMY	910	17	dev-adult.embryo.dev-embryo.PL	0.004137399999999999	0	False	EBZ_910.1_sets_PL.embryo	0.0	0.0	1.0	0.0	1.0	0.0	1.0	910.1	sense;intronic;threeUTR;	LVDLSIIRSCVIPFHMY	17	15
1041	LVDLSIIR	910	8	dev-adult	0.10766	0	False	EBZ_910.1_sets_PL.embryo	0.0	0.0	1.0	0.0	1.0	0.0	1.0	910.1	sense;intronic;threeUTR;	LVDLSIIRSCVIPFHMY	17	15
1042	LTASTGTGPNSTR	912	13	embryo	0.0031386999999999995	0	False	EBZ_912.1_sets_embryo	1.0	0.0	0.0	0.0	0.0	0.0	0.0	912.1	intergenic;	KLTASTGTGPNSTRTQLLLYLYLWVVTMKHAT	32	27
1043	HDFKNDFVMFR	915	11	embryo.dev-embryo	0.16960999999999998	0	False	EBZ_915.1_sets_embryo	1.0	0.0	0.0	0.0	0.0	0.0	0.0	915.1	intergenic;	RHTDNLFVYIKNIVKKTLANIKTYDRHDFKNDFVMFRLEDVEFSNLRKH	49	34
1044	KTLANIKTYDR	915	11	embryo	4.0388	0	False	EBZ_915.1_sets_embryo	1.0	0.0	0.0	0.0	0.0	0.0	0.0	915.1	intergenic;	RHTDNLFVYIKNIVKKTLANIKTYDRHDFKNDFVMFRLEDVEFSNLRKH	49	34
1045	LEDVEFSNLR	915	10	dev-adult.embryo.dev-embryo.PL	0.00057733	0	False	EBZ_915.1_sets_embryo	1.0	0.0	0.0	0.0	0.0	0.0	0.0	915.1	intergenic;	RHTDNLFVYIKNIVKKTLANIKTYDRHDFKNDFVMFRLEDVEFSNLRKH	49	34
1046	LEDVEFSNLRK	915	11	dev-adult.embryo.dev-embryo.PL	0.044072	0	False	EBZ_915.1_sets_embryo	1.0	0.0	0.0	0.0	0.0	0.0	0.0	915.1	intergenic;	RHTDNLFVYIKNIVKKTLANIKTYDRHDFKNDFVMFRLEDVEFSNLRKH	49	34
1047	NDFVMFRLEDVEFSNLRK	915	18	embryo	0.40622	0	False	EBZ_915.1_sets_embryo	1.0	0.0	0.0	0.0	0.0	0.0	0.0	915.1	intergenic;	RHTDNLFVYIKNIVKKTLANIKTYDRHDFKNDFVMFRLEDVEFSNLRKH	49	34
1048	TLANIKTYDR	915	10	dev-adult.embryo.PL	0.17856	0	False	EBZ_915.1_sets_embryo	1.0	0.0	0.0	0.0	0.0	0.0	0.0	915.1	intergenic;	RHTDNLFVYIKNIVKKTLANIKTYDRHDFKNDFVMFRLEDVEFSNLRKH	49	34
1049	RHTDNLFVYIKNIVK	915	15	PL	0.38737	0	False	EBZ_915.1_sets_embryo	1.0	0.0	0.0	0.0	0.0	0.0	0.0	915.1	intergenic;	RHTDNLFVYIKNIVKKTLANIKTYDRHDFKNDFVMFRLEDVEFSNLRKH	49	34
1050	TYDRHDFKNDFVMFR	915	15	dev-adult.PL	0.37609	0	False	EBZ_915.1_sets_embryo	1.0	0.0	0.0	0.0	0.0	0.0	0.0	915.1	intergenic;	RHTDNLFVYIKNIVKKTLANIKTYDRHDFKNDFVMFRLEDVEFSNLRKH	49	34
1051	TYDRHDFK	915	8	dev-embryo	0.85803	0	False	EBZ_915.1_sets_embryo	1.0	0.0	0.0	0.0	0.0	0.0	0.0	915.1	intergenic;	RHTDNLFVYIKNIVKKTLANIKTYDRHDFKNDFVMFRLEDVEFSNLRKH	49	34
1053	GMLLPPA	916	7	embryo	0.50139	0	False	EBZ_916.1_sets_embryo	0.0	1.0	0.0	0.0	0.0	0.0	0.0	916.1	antisense;	VDCGRWRRTRSGCCWVRCEGPRCNMASNLALNGNGSGSGCSPGSGRVSVCDSGRKSAGFLASTICWRFKLGRCLRRLMLLMVLYRTGSNLGGRGMLLPPAAATGAAIGPAPGTGSFEGFPVVVDTSAGTSSALPVSLRSIFSSLMALSIKRRTSVSLFDCFSSGLVLGSSSGTGSSSTSPSTSSDLLATTFTWWALAFIMMWLNRSLNLVECSGSSMVEAWDMMEVCEPKRWNRNTGLEASSSFTDSASPSNLSPFTKGTSLALTFSNCS	270	24
1055	LGRCLRR	916	7	embryo	3.0779	0	False	EBZ_916.1_sets_embryo	0.0	1.0	0.0	0.0	0.0	0.0	0.0	916.1	antisense;	VDCGRWRRTRSGCCWVRCEGPRCNMASNLALNGNGSGSGCSPGSGRVSVCDSGRKSAGFLASTICWRFKLGRCLRRLMLLMVLYRTGSNLGGRGMLLPPAAATGAAIGPAPGTGSFEGFPVVVDTSAGTSSALPVSLRSIFSSLMALSIKRRTSVSLFDCFSSGLVLGSSSGTGSSSTSPSTSSDLLATTFTWWALAFIMMWLNRSLNLVECSGSSMVEAWDMMEVCEPKRWNRNTGLEASSSFTDSASPSNLSPFTKGTSLALTFSNCS	270	24
1057	LMLLMVLYR	916	9	embryo.dev-embryo	0.0010681	0	False	EBZ_916.1_sets_embryo	0.0	1.0	0.0	0.0	0.0	0.0	0.0	916.1	antisense;	VDCGRWRRTRSGCCWVRCEGPRCNMASNLALNGNGSGSGCSPGSGRVSVCDSGRKSAGFLASTICWRFKLGRCLRRLMLLMVLYRTGSNLGGRGMLLPPAAATGAAIGPAPGTGSFEGFPVVVDTSAGTSSALPVSLRSIFSSLMALSIKRRTSVSLFDCFSSGLVLGSSSGTGSSSTSPSTSSDLLATTFTWWALAFIMMWLNRSLNLVECSGSSMVEAWDMMEVCEPKRWNRNTGLEASSSFTDSASPSNLSPFTKGTSLALTFSNCS	270	24
1059	SAGFLASTICWRFK	916	14	embryo	0.18088	0	False	EBZ_916.1_sets_embryo	0.0	1.0	0.0	0.0	0.0	0.0	0.0	916.1	antisense;	VDCGRWRRTRSGCCWVRCEGPRCNMASNLALNGNGSGSGCSPGSGRVSVCDSGRKSAGFLASTICWRFKLGRCLRRLMLLMVLYRTGSNLGGRGMLLPPAAATGAAIGPAPGTGSFEGFPVVVDTSAGTSSALPVSLRSIFSSLMALSIKRRTSVSLFDCFSSGLVLGSSSGTGSSSTSPSTSSDLLATTFTWWALAFIMMWLNRSLNLVECSGSSMVEAWDMMEVCEPKRWNRNTGLEASSSFTDSASPSNLSPFTKGTSLALTFSNCS	270	24
1061	HMATLTSNIGSLR	917	13	dev-adult.embryo.dev-embryo.PL	0.00022509	0	False	EBZ_917.1_sets_PL.embryo.dev-adult.dev-embryo	2.0	5.0	2.0	2.0	1.0	0.0	0.0	917.1	intergenic;antisense;sense;exonic;intronic;	ALLLDATRQGNHLWSRPTHRPAAHQQGRLLLLLLLRRVVVAANLLLLLLLLVQRWLPAEAARLLRWRWQHELLLMMMHRVGQWHRLLVDVVMVVVRGVVDRHMATLTSNIGSLR	114	74
1063	GVVDRHMATLTSNIGSLR	917	18	dev-embryo.PL	0.13627	0	False	EBZ_917.1_sets_PL.embryo.dev-adult.dev-embryo	2.0	5.0	2.0	2.0	1.0	0.0	0.0	917.1	intergenic;antisense;sense;exonic;intronic;	ALLLDATRQGNHLWSRPTHRPAAHQQGRLLLLLLLRRVVVAANLLLLLLLLVQRWLPAEAARLLRWRWQHELLLMMMHRVGQWHRLLVDVVMVVVRGVVDRHMATLTSNIGSLR	114	74
1064	ICLPSEILAK	922	10	embryo.dev-embryo	0.00029706	0	False	EBZ_922.1_sets_embryo	1.0	0.0	0.0	0.0	0.0	0.0	0.0	922.1	intergenic;	RLTHLIAVGKSFRICLPSEILAKISGRARDLSSCW	35	-1
1065	ISGRARDLSSCW	922	12	embryo.dev-embryo	0.38761	0	False	EBZ_922.1_sets_embryo	1.0	0.0	0.0	0.0	0.0	0.0	0.0	922.1	intergenic;	RLTHLIAVGKSFRICLPSEILAKISGRARDLSSCW	35	-1
1066	LTHLIAVGK	922	9	dev-adult	0.13752	0	False	EBZ_922.1_sets_embryo	1.0	0.0	0.0	0.0	0.0	0.0	0.0	922.1	intergenic;	RLTHLIAVGKSFRICLPSEILAKISGRARDLSSCW	35	-1
1067	ASSAATSISHTEMR	929	14	dev-adult.embryo.PL	0.010336	0	False	EBZ_929.1_sets_embryo	1.0	0.0	0.0	0.0	0.0	0.0	0.0	929.1	intergenic;	MNISEHRKNTTGSWPSIIGRSWAENHNFRQTLIPTNLQDKRSGFDNIIRASSAATSISHTEMRLART	67	0
1068	ASSAATSISHTEMRLAR	929	17	dev-adult.embryo.dev-embryo.PL	0.0031266	0	False	EBZ_929.1_sets_embryo	1.0	0.0	0.0	0.0	0.0	0.0	0.0	929.1	intergenic;	MNISEHRKNTTGSWPSIIGRSWAENHNFRQTLIPTNLQDKRSGFDNIIRASSAATSISHTEMRLART	67	0
1069	MNISEHRK	929	8	dev-adult.embryo.dev-embryo.PL	0.022664	0	False	EBZ_929.1_sets_embryo	1.0	0.0	0.0	0.0	0.0	0.0	0.0	929.1	intergenic;	MNISEHRKNTTGSWPSIIGRSWAENHNFRQTLIPTNLQDKRSGFDNIIRASSAATSISHTEMRLART	67	0
1070	MNISEHRKNTTGSWPSIIGR	929	20	embryo	0.37824	0	False	EBZ_929.1_sets_embryo	1.0	0.0	0.0	0.0	0.0	0.0	0.0	929.1	intergenic;	MNISEHRKNTTGSWPSIIGRSWAENHNFRQTLIPTNLQDKRSGFDNIIRASSAATSISHTEMRLART	67	0
1071	QTLIPTNLQDKRSGFDNIIR	929	20	embryo	0.36898	0	False	EBZ_929.1_sets_embryo	1.0	0.0	0.0	0.0	0.0	0.0	0.0	929.1	intergenic;	MNISEHRKNTTGSWPSIIGRSWAENHNFRQTLIPTNLQDKRSGFDNIIRASSAATSISHTEMRLART	67	0
1072	RSGFDNIIR	929	9	embryo	0.4864	0	False	EBZ_929.1_sets_embryo	1.0	0.0	0.0	0.0	0.0	0.0	0.0	929.1	intergenic;	MNISEHRKNTTGSWPSIIGRSWAENHNFRQTLIPTNLQDKRSGFDNIIRASSAATSISHTEMRLART	67	0
1073	SGFDNIIR	929	8	embryo	0.33061	0	False	EBZ_929.1_sets_embryo	1.0	0.0	0.0	0.0	0.0	0.0	0.0	929.1	intergenic;	MNISEHRKNTTGSWPSIIGRSWAENHNFRQTLIPTNLQDKRSGFDNIIRASSAATSISHTEMRLART	67	0
1074	SWAENHNFRQTLIPTNLQDKR	929	21	embryo.dev-embryo.dev-adult	0.36533	0	False	EBZ_929.1_sets_embryo	1.0	0.0	0.0	0.0	0.0	0.0	0.0	929.1	intergenic;	MNISEHRKNTTGSWPSIIGRSWAENHNFRQTLIPTNLQDKRSGFDNIIRASSAATSISHTEMRLART	67	0
1075	QTLIPTNLQDKR	929	12	PL	0.17179	0	False	EBZ_929.1_sets_embryo	1.0	0.0	0.0	0.0	0.0	0.0	0.0	929.1	intergenic;	MNISEHRKNTTGSWPSIIGRSWAENHNFRQTLIPTNLQDKRSGFDNIIRASSAATSISHTEMRLART	67	0
1076	SWAENHNFR	929	9	dev-embryo.PL	0.30636	0	False	EBZ_929.1_sets_embryo	1.0	0.0	0.0	0.0	0.0	0.0	0.0	929.1	intergenic;	MNISEHRKNTTGSWPSIIGRSWAENHNFRQTLIPTNLQDKRSGFDNIIRASSAATSISHTEMRLART	67	0
1077	NISEHRKNTTGSWPSIIGR	929	19	dev-adult	0.41059	0	False	EBZ_929.1_sets_embryo	1.0	0.0	0.0	0.0	0.0	0.0	0.0	929.1	intergenic;	MNISEHRKNTTGSWPSIIGRSWAENHNFRQTLIPTNLQDKRSGFDNIIRASSAATSISHTEMRLART	67	0
1078	QTLIPTNLQDK	929	11	dev-embryo	0.16099000000000002	0	False	EBZ_929.1_sets_embryo	1.0	0.0	0.0	0.0	0.0	0.0	0.0	929.1	intergenic;	MNISEHRKNTTGSWPSIIGRSWAENHNFRQTLIPTNLQDKRSGFDNIIRASSAATSISHTEMRLART	67	0
1079	IFQGFSFWPTQHFPTHGSQK	933	20	embryo.dev-adult	0.0014853	0	False	EBZ_933.1_sets_embryo	0.0	1.0	0.0	0.0	0.0	0.0	0.0	933.1	antisense;	IFQGFSFWPTQHFPTHGSQKTK	22	-1
1080	IFQGFSFWPTQHFPTHGSQKTK	933	22	embryo	0.20281	0	False	EBZ_933.1_sets_embryo	0.0	1.0	0.0	0.0	0.0	0.0	0.0	933.1	antisense;	IFQGFSFWPTQHFPTHGSQKTK	22	-1
1081	YFFQSIEVNAK	944	11	embryo.dev-embryo	0.0046890000000000005	0	False	EBZ_944.1_sets_embryo	1.0	0.0	0.0	0.0	0.0	0.0	0.0	944.1	intergenic;	YFFQSIEVNAKYKKYIYIFHFNGTLLSILHCKIR	34	-1
1082	HHSCASQLHQTHCLDSK	947	17	embryo.dev-adult	0.00069622	0	False	EBZ_947.1_sets_embryo	0.0	0.0	1.0	1.0	0.0	0.0	0.0	947.1	sense;exonic;	HHSCASQLHQTHCLDSKAIDACGAKSQ	27	-1
1083	HHSCASQLHQTHCLDSKAIDACGAK	947	25	embryo	0.21903000000000006	0	False	EBZ_947.1_sets_embryo	0.0	0.0	1.0	1.0	0.0	0.0	0.0	947.1	sense;exonic;	HHSCASQLHQTHCLDSKAIDACGAKSQ	27	-1
1084	SNSIAHTRPHVPLRDNFLHLCVVIAMQ	948	27	dev-adult.embryo.dev-embryo.PL	0.00027906	0	False	EBZ_948.1_sets_embryo.dev-adult	1.0	0.0	0.0	0.0	0.0	0.0	0.0	948.1	intergenic;	SRPLHCTYIHNIRSNSIAHTRPHVPLRDNFLHLCVVIAMQ	40	38
1085	SRPLHCTYIHNIR	948	13	PL	0.12575	0	False	EBZ_948.1_sets_embryo.dev-adult	1.0	0.0	0.0	0.0	0.0	0.0	0.0	948.1	intergenic;	SRPLHCTYIHNIRSNSIAHTRPHVPLRDNFLHLCVVIAMQ	40	38
1086	DNFLHLCVVIAMQ	948	13	dev-adult	0.14736	0	False	EBZ_948.1_sets_embryo.dev-adult	1.0	0.0	0.0	0.0	0.0	0.0	0.0	948.1	intergenic;	SRPLHCTYIHNIRSNSIAHTRPHVPLRDNFLHLCVVIAMQ	40	38
1087	LLFNDRR	950	7	embryo.dev-adult	0.043688	0	False	EBZ_950.1_sets_embryo	0.0	1.0	0.0	0.0	0.0	0.0	0.0	950.1	antisense;	VIVAGIRGHRLLFNDRRSSQLGRSSSIWDRSLRRCGSGRRVQRCGGRILSGVA	53	-1
1088	SSQLGRSSSIWDR	950	13	dev-adult.embryo.PL	0.0067047	0	False	EBZ_950.1_sets_embryo	0.0	1.0	0.0	0.0	0.0	0.0	0.0	950.1	antisense;	VIVAGIRGHRLLFNDRRSSQLGRSSSIWDRSLRRCGSGRRVQRCGGRILSGVA	53	-1
1089	VIVAGIRGHRLLFNDR	950	16	embryo	0.21935	0	False	EBZ_950.1_sets_embryo	0.0	1.0	0.0	0.0	0.0	0.0	0.0	950.1	antisense;	VIVAGIRGHRLLFNDRRSSQLGRSSSIWDRSLRRCGSGRRVQRCGGRILSGVA	53	-1
1090	VQRCGGR	950	7	embryo	11.167	0	False	EBZ_950.1_sets_embryo	0.0	1.0	0.0	0.0	0.0	0.0	0.0	950.1	antisense;	VIVAGIRGHRLLFNDRRSSQLGRSSSIWDRSLRRCGSGRRVQRCGGRILSGVA	53	-1
1091	VIVAGIR	950	7	PL	0.072943	0	False	EBZ_950.1_sets_embryo	0.0	1.0	0.0	0.0	0.0	0.0	0.0	950.1	antisense;	VIVAGIRGHRLLFNDRRSSQLGRSSSIWDRSLRRCGSGRRVQRCGGRILSGVA	53	-1
1092	VIVAGIRGHR	950	10	PL	0.083415	0	False	EBZ_950.1_sets_embryo	0.0	1.0	0.0	0.0	0.0	0.0	0.0	950.1	antisense;	VIVAGIRGHRLLFNDRRSSQLGRSSSIWDRSLRRCGSGRRVQRCGGRILSGVA	53	-1
1093	LYDLTTSMSQRER	954	13	embryo	0.028045	0	False	EBZ_954.2_sets_embryo	0.0	1.0	0.0	0.0	0.0	0.0	0.0	954.2	antisense;	LYDLTTSMSQRERRSKK	17	7
1095	LYDLTTSMSQRERR	954	14	embryo	0.015747	0	False	EBZ_954.2_sets_embryo	0.0	1.0	0.0	0.0	0.0	0.0	0.0	954.2	antisense;	LYDLTTSMSQRERRSKK	17	7
1097	PLGSCLPLR	957	9	embryo.dev-embryo	0.00019296	0	False	EBZ_957.1_sets_embryo.dev-embryo	0.0	0.0	1.0	0.0	1.0	0.0	0.0	957.1	sense;intronic;	TESNERERPLGSCLPLRLKTCFSQLTKSCKECLIKKLNYLHT	42	-1
1098	PLGSCLPLRLKTCFSQLTK	957	19	embryo	0.35954	0	False	EBZ_957.1_sets_embryo.dev-embryo	0.0	0.0	1.0	0.0	1.0	0.0	0.0	957.1	sense;intronic;	TESNERERPLGSCLPLRLKTCFSQLTKSCKECLIKKLNYLHT	42	-1
1099	TESNERER	957	8	dev-embryo	0.8489899999999999	0	False	EBZ_957.1_sets_embryo.dev-embryo	0.0	0.0	1.0	0.0	1.0	0.0	0.0	957.1	sense;intronic;	TESNERERPLGSCLPLRLKTCFSQLTKSCKECLIKKLNYLHT	42	-1
1100	RPEDCQTAQR	961	10	embryo	0.14514000000000002	0	False	EBZ_961.1_sets_embryo	1.0	0.0	0.0	0.0	0.0	0.0	0.0	961.1	intergenic;	VGKTADWWTEDRRPEDCQTAQRPRSEDWFCDPQIVVSQLRFNVAHIIHSVRFYYFMFVLFVILTR	65	55
1101	TADWWTEDRR	961	10	embryo.dev-adult	0.010375	0	False	EBZ_961.1_sets_embryo	1.0	0.0	0.0	0.0	0.0	0.0	0.0	961.1	intergenic;	VGKTADWWTEDRRPEDCQTAQRPRSEDWFCDPQIVVSQLRFNVAHIIHSVRFYYFMFVLFVILTR	65	55
1102	VGKTADWWTEDR	961	12	embryo	0.17935	0	False	EBZ_961.1_sets_embryo	1.0	0.0	0.0	0.0	0.0	0.0	0.0	961.1	intergenic;	VGKTADWWTEDRRPEDCQTAQRPRSEDWFCDPQIVVSQLRFNVAHIIHSVRFYYFMFVLFVILTR	65	55
1103	ITSGRPEGHITHDR	965	14	embryo	1.0205	0	False	EBZ_965.1_sets_embryo	0.0	1.0	0.0	0.0	0.0	0.0	0.0	965.1	antisense;	KITSGRPEGHITHDRIEHAQQNGAL	25	-1
1104	ITSGRPEGHITHDRIEHAQQNGAL	965	24	dev-adult.embryo.dev-embryo.PL	0.00041911	0	False	EBZ_965.1_sets_embryo	0.0	1.0	0.0	0.0	0.0	0.0	0.0	965.1	antisense;	KITSGRPEGHITHDRIEHAQQNGAL	25	-1
1105	PEGHITHDRIEHAQQNGAL	965	19	embryo	0.20165	0	False	EBZ_965.1_sets_embryo	0.0	1.0	0.0	0.0	0.0	0.0	0.0	965.1	antisense;	KITSGRPEGHITHDRIEHAQQNGAL	25	-1
1106	AQAEECKGK	972	9	embryo	1.0233	0	False	EBZ_972.1_sets_embryo.dev-embryo	0.0	1.0	0.0	0.0	0.0	0.0	0.0	972.1	antisense;	KSKAQAEECKGKREQGLLLDFP	22	-1
1107	SKAQAEECK	972	9	embryo.dev-embryo.dev-adult	0.00052955	0	False	EBZ_972.1_sets_embryo.dev-embryo	0.0	1.0	0.0	0.0	0.0	0.0	0.0	972.1	antisense;	KSKAQAEECKGKREQGLLLDFP	22	-1
1108	AIDDRNRTNAVNWENAFR	978	18	embryo	3.552	0	False	EBZ_978.1_sets_PL.embryo	1.0	0.0	0.0	0.0	0.0	0.0	0.0	978.1	intergenic;	NNEVCITKDLMCMFQTNRILFKAIDDRNRTNAVNWENAFRRRIC	44	10
1109	DLMCMFQTNR	978	10	embryo.dev-embryo.PL	0.14993	0	False	EBZ_978.1_sets_PL.embryo	1.0	0.0	0.0	0.0	0.0	0.0	0.0	978.1	intergenic;	NNEVCITKDLMCMFQTNRILFKAIDDRNRTNAVNWENAFRRRIC	44	10
1110	DLMCMFQTNRILFKAIDDR	978	19	embryo.dev-embryo.PL	0.00064673	0	False	EBZ_978.1_sets_PL.embryo	1.0	0.0	0.0	0.0	0.0	0.0	0.0	978.1	intergenic;	NNEVCITKDLMCMFQTNRILFKAIDDRNRTNAVNWENAFRRRIC	44	10
1111	NNEVCITKDLMCMFQTNR	978	18	embryo	0.1291	0	False	EBZ_978.1_sets_PL.embryo	1.0	0.0	0.0	0.0	0.0	0.0	0.0	978.1	intergenic;	NNEVCITKDLMCMFQTNRILFKAIDDRNRTNAVNWENAFRRRIC	44	10
1112	TNAVNWENAFR	978	11	PL	0.47384	0	False	EBZ_978.1_sets_PL.embryo	1.0	0.0	0.0	0.0	0.0	0.0	0.0	978.1	intergenic;	NNEVCITKDLMCMFQTNRILFKAIDDRNRTNAVNWENAFRRRIC	44	10
1113	TNAVNWENAFRR	978	12	PL	0.07858	0	False	EBZ_978.1_sets_PL.embryo	1.0	0.0	0.0	0.0	0.0	0.0	0.0	978.1	intergenic;	NNEVCITKDLMCMFQTNRILFKAIDDRNRTNAVNWENAFRRRIC	44	10
1114	KSLSILKDLTGGMHNLLISSGYCSDR	986	26	embryo.dev-adult	0.0043575	0	False	EBZ_986.1_sets_embryo.dev-adult	0.0	0.0	1.0	0.0	0.0	0.0	0.0	986.1	sense;	KSLSILKDLTGGMHNLLISSGYCSDRVYGRQLRVL	35	12
1115	DLTGGMHNLLISSGYCSDR	986	19	dev-adult	0.15728	0	False	EBZ_986.1_sets_embryo.dev-adult	0.0	0.0	1.0	0.0	0.0	0.0	0.0	986.1	sense;	KSLSILKDLTGGMHNLLISSGYCSDRVYGRQLRVL	35	12
1116	IFISLGF	987	7	embryo.dev-embryo.dev-adult	0.087113	0	False	EBZ_987.1_sets_embryo	0.0	1.0	0.0	0.0	0.0	0.0	0.0	987.1	antisense;	VCRSIAKAHKTIDSGSAEVHQIIMFKTILQNFALISLNSTSFRIFISLGF	50	23
1117	VCRSIAKAHK	987	10	embryo	0.020585	0	False	EBZ_987.1_sets_embryo	0.0	1.0	0.0	0.0	0.0	0.0	0.0	987.1	antisense;	VCRSIAKAHKTIDSGSAEVHQIIMFKTILQNFALISLNSTSFRIFISLGF	50	23
1119	ASSDGRRPAR	993	10	embryo.dev-embryo.dev-adult	0.00058776	0	False	EBZ_993.1_sets_embryo.dev-embryo	0.0	0.0	2.0	2.0	0.0	0.0	1.0	993.1	sense;exonic;threeUTR;	ASSDGRRPARLEHLLRSTLLPLSAGRTHPAQSAQHVPFDAGARAGQDLSLSPTANHKLPSALGRGSL	67	-1
1120	EINVFFFMNAR	995	11	embryo.dev-embryo.PL	0.0024297	0	False	EBZ_995.1_sets_embryo	0.0	0.0	1.0	0.0	1.0	0.0	0.0	995.1	sense;intronic;	TQTGMLGIQIRIQKEINVFFFMNARPIRS	29	4
1121	IQKEINVFFFMNAR	995	14	PL	0.18884	0	False	EBZ_995.1_sets_embryo	0.0	0.0	1.0	0.0	1.0	0.0	0.0	995.1	sense;intronic;	TQTGMLGIQIRIQKEINVFFFMNARPIRS	29	4
1122	EINVFFFMNARPIRS	995	15	dev-embryo	0.1506	0	False	EBZ_995.1_sets_embryo	0.0	0.0	1.0	0.0	1.0	0.0	0.0	995.1	sense;intronic;	TQTGMLGIQIRIQKEINVFFFMNARPIRS	29	4
1123	HSSFCSSHRK	997	10	dev-adult.PL	0.0019875	0	False	EBZ_997.1_sets_embryo	0.0	0.0	1.0	0.0	0.0	0.0	1.0	997.1	sense;threeUTR;	TLPARRPPWNLGTHECTYPCTRTRTASRARRHSSFCSSHRKCATSTSPCRTFDHRSVAAPT	61	-1
1124	HSSFCSSHRKCATSTSPCR	997	19	dev-adult.PL	0.38732	0	False	EBZ_997.1_sets_embryo	0.0	0.0	1.0	0.0	0.0	0.0	1.0	997.1	sense;threeUTR;	TLPARRPPWNLGTHECTYPCTRTRTASRARRHSSFCSSHRKCATSTSPCRTFDHRSVAAPT	61	-1
1125	PPWNLGTHECTYPCTR	997	16	PL	0.15373	0	False	EBZ_997.1_sets_embryo	0.0	0.0	1.0	0.0	0.0	0.0	1.0	997.1	sense;threeUTR;	TLPARRPPWNLGTHECTYPCTRTRTASRARRHSSFCSSHRKCATSTSPCRTFDHRSVAAPT	61	-1
1126	RHSSFCSSHRK	997	11	PL	0.35868	0	False	EBZ_997.1_sets_embryo	0.0	0.0	1.0	0.0	0.0	0.0	1.0	997.1	sense;threeUTR;	TLPARRPPWNLGTHECTYPCTRTRTASRARRHSSFCSSHRKCATSTSPCRTFDHRSVAAPT	61	-1
1127	PPWNLGTHECTYPCTRTR	997	18	dev-adult	0.2238	0	False	EBZ_997.1_sets_embryo	0.0	0.0	1.0	0.0	0.0	0.0	1.0	997.1	sense;threeUTR;	TLPARRPPWNLGTHECTYPCTRTRTASRARRHSSFCSSHRKCATSTSPCRTFDHRSVAAPT	61	-1
1128	TNELRVAAESDI	998	12	dev-adult.embryo.dev-embryo.PL	0.0024507	0	False	EBZ_998.1_sets_embryo	0.0	1.0	0.0	0.0	0.0	0.0	0.0	998.1	antisense;	MAKGRTNELRVAAESDI	17	0
1129	TLAKSELLR	999	9	embryo.dev-embryo	0.16847	0	False	EBZ_999.1_sets_embryo	0.0	0.0	1.0	0.0	1.0	0.0	0.0	999.1	sense;intronic;	DLKSGVEKSPKRRGRQTLTGGKTKCKTLAKSELLRQIRM	39	38
1130	TLAKSELLRQIR	999	12	embryo.dev-embryo.PL	0.0014631	0	False	EBZ_999.1_sets_embryo	0.0	0.0	1.0	0.0	1.0	0.0	0.0	999.1	sense;intronic;	DLKSGVEKSPKRRGRQTLTGGKTKCKTLAKSELLRQIRM	39	38
1131	GRQTLTGGK	999	9	PL	0.95324	0	False	EBZ_999.1_sets_embryo	0.0	0.0	1.0	0.0	1.0	0.0	0.0	999.1	sense;intronic;	DLKSGVEKSPKRRGRQTLTGGKTKCKTLAKSELLRQIRM	39	38
1132	GIVAGQVHASADR	1001	13	embryo.dev-adult	2.3851e-10	0	False	EBZ_1001.1_sets_embryo	0.0	0.0	1.0	0.0	1.0	0.0	0.0	1001.1	sense;intronic;	PHHPSSFSSRGIVAGQVHASADRGGPCFPIEFNLFLLLMSLF	42	38
1133	PHHPSSFSSRGIVAGQVHASADR	1001	23	embryo	0.16627999999999998	0	False	EBZ_1001.1_sets_embryo	0.0	0.0	1.0	0.0	1.0	0.0	0.0	1001.1	sense;intronic;	PHHPSSFSSRGIVAGQVHASADRGGPCFPIEFNLFLLLMSLF	42	38
1134	GYASQILQTR	1004	10	dev-adult.embryo.dev-embryo.PL	1.7168e-16	0	False	EBZ_1004.1_sets_embryo.dev-embryo	0.0	1.0	0.0	0.0	0.0	0.0	0.0	1004.1	antisense;	GYASQILQTRTTISKFEKRSLQYAFAIRIPY	31	-1
1135	RSLQYAFAIR	1004	10	dev-adult.embryo.PL	0.13392	0	False	EBZ_1004.1_sets_embryo.dev-embryo	0.0	1.0	0.0	0.0	0.0	0.0	0.0	1004.1	antisense;	GYASQILQTRTTISKFEKRSLQYAFAIRIPY	31	-1
1136	SLQYAFAIR	1004	9	embryo.dev-adult	0.13192	0	False	EBZ_1004.1_sets_embryo.dev-embryo	0.0	1.0	0.0	0.0	0.0	0.0	0.0	1004.1	antisense;	GYASQILQTRTTISKFEKRSLQYAFAIRIPY	31	-1
1137	SLQYAFAIRIPY	1004	12	embryo	0.192	0	False	EBZ_1004.1_sets_embryo.dev-embryo	0.0	1.0	0.0	0.0	0.0	0.0	0.0	1004.1	antisense;	GYASQILQTRTTISKFEKRSLQYAFAIRIPY	31	-1
1138	TTISKFEKR	1004	9	dev-adult.PL	0.487	0	False	EBZ_1004.1_sets_embryo.dev-embryo	0.0	1.0	0.0	0.0	0.0	0.0	0.0	1004.1	antisense;	GYASQILQTRTTISKFEKRSLQYAFAIRIPY	31	-1
1139	VQIDYRVAPFSR	1011	12	embryo	0.013267	0	False	EBZ_1011.1_sets_embryo	0.0	0.0	1.0	1.0	1.0	0.0	0.0	1011.1	sense;exonic;intronic;	LLMGKVQIDYRVAPFSRSRLRLSLLCRPQVGATFGGRVQSGRHPADADELQWVSAGGDGSHLLRNRFH	68	2
1140	PKSLLYHFHFENR	1013	13	embryo.dev-embryo	0.8044899999999999	0	False	EBZ_1013.1_sets_embryo	0.0	0.0	1.0	0.0	1.0	0.0	0.0	1013.1	sense;intronic;	PKSLLYHFHFENRREHTKHTCENVPGVGIILWPGEGPSGLQAFGQ	45	-1
1141	SLLYHFHFENR	1013	11	dev-adult.embryo.dev-embryo.PL	0.0030341	0	False	EBZ_1013.1_sets_embryo	0.0	0.0	1.0	0.0	1.0	0.0	0.0	1013.1	sense;intronic;	PKSLLYHFHFENRREHTKHTCENVPGVGIILWPGEGPSGLQAFGQ	45	-1
1142	SLLYHFHFENRR	1013	12	embryo	0.12265	0	False	EBZ_1013.1_sets_embryo	0.0	0.0	1.0	0.0	1.0	0.0	0.0	1013.1	sense;intronic;	PKSLLYHFHFENRREHTKHTCENVPGVGIILWPGEGPSGLQAFGQ	45	-1
1143	SLLYHFHFENRREHTK	1013	16	dev-adult.PL	0.33663000000000004	0	False	EBZ_1013.1_sets_embryo	0.0	0.0	1.0	0.0	1.0	0.0	0.0	1013.1	sense;intronic;	PKSLLYHFHFENRREHTKHTCENVPGVGIILWPGEGPSGLQAFGQ	45	-1
1144	SHLSVAEAEAK	1015	11	embryo	0.001225	0	False	EBZ_1015.1_sets_embryo	0.0	0.0	1.0	0.0	1.0	0.0	0.0	1015.1	sense;intronic;	MSPSLGSIPRSHLSVAEAEAKAKDNGLIA	29	0
1145	FCITTAK	1016	7	embryo	2.341	0	False	EBZ_1016.1_sets_embryo	0.0	1.0	0.0	0.0	0.0	0.0	0.0	1016.1	antisense;	ILFYRFCITTAKLFFLKCM	19	18
1146	ILFYRFCITTAK	1016	12	dev-adult.embryo.dev-embryo.PL	0.0015493	0	False	EBZ_1016.1_sets_embryo	0.0	1.0	0.0	0.0	0.0	0.0	0.0	1016.1	antisense;	ILFYRFCITTAKLFFLKCM	19	18
1147	ATVEWLSLGAID	1020	12	embryo.dev-adult	0.004541600000000001	0	False	EBZ_1020.1_sets_embryo	1.0	0.0	0.0	0.0	0.0	0.0	0.0	1020.1	intergenic;	FLIKTKCTLNAQILGKCRVLLILAADFVVRATVEWLSLGAID	42	-1
1148	CTLNAQILGK	1020	10	embryo	0.2145	0	False	EBZ_1020.1_sets_embryo	1.0	0.0	0.0	0.0	0.0	0.0	0.0	1020.1	intergenic;	FLIKTKCTLNAQILGKCRVLLILAADFVVRATVEWLSLGAID	42	-1
1149	CTLNAQILGKCRVLLILAADFVVR	1020	24	embryo	0.43297	0	False	EBZ_1020.1_sets_embryo	1.0	0.0	0.0	0.0	0.0	0.0	0.0	1020.1	intergenic;	FLIKTKCTLNAQILGKCRVLLILAADFVVRATVEWLSLGAID	42	-1
1150	CILNIHCMCKK	1022	11	embryo.dev-embryo.PL	0.00032534	0	False	EBZ_1022.1_sets_PL.embryo.dev-embryo	0.0	1.0	0.0	0.0	0.0	0.0	0.0	1022.1	antisense;	LLNGKCILNIHCMCKKI	17	12
1151	LLNGKCILNIHCMCK	1022	15	embryo.PL	0.18113	0	False	EBZ_1022.1_sets_PL.embryo.dev-embryo	0.0	1.0	0.0	0.0	0.0	0.0	0.0	1022.1	antisense;	LLNGKCILNIHCMCKKI	17	12
1152	MAAQVHIQAENGAGLAGK	1025	18	dev-adult.embryo.dev-embryo.PL	7.5847e-05	0	False	EBZ_1025.1_sets_PL.embryo.dev-embryo	0.0	0.0	1.0	0.0	1.0	0.0	0.0	1025.1	sense;intronic;	MAAQVHIQAENGAGLAGKAARGGENSTKS	29	0
1153	MAAQVHIQAENGAGLAGKAAR	1025	21	embryo.PL	0.19826	0	False	EBZ_1025.1_sets_PL.embryo.dev-embryo	0.0	0.0	1.0	0.0	1.0	0.0	0.0	1025.1	sense;intronic;	MAAQVHIQAENGAGLAGKAARGGENSTKS	29	0
1154	AAQVHIQAENGAGLAGKAARGGENSTK	1025	27	dev-adult	0.4411600000000001	0	False	EBZ_1025.1_sets_PL.embryo.dev-embryo	0.0	0.0	1.0	0.0	1.0	0.0	0.0	1025.1	sense;intronic;	MAAQVHIQAENGAGLAGKAARGGENSTKS	29	0
1155	AGRWWGHR	1030	8	dev-adult	0.048789	0	False	EBZ_1030.1_sets_embryo	0.0	1.0	0.0	0.0	0.0	0.0	0.0	1030.1	antisense;	ATQDRCYKDIRLLGRKNVVQSQTQSKTDRFLVHQQKLVGGWALKRAGRWWGHRVLLLPSDLPTIP	65	-1
1156	ATQDRCYKDIR	1030	11	dev-adult	0.21013	0	False	EBZ_1030.1_sets_embryo	0.0	1.0	0.0	0.0	0.0	0.0	0.0	1030.1	antisense;	ATQDRCYKDIRLLGRKNVVQSQTQSKTDRFLVHQQKLVGGWALKRAGRWWGHRVLLLPSDLPTIP	65	-1
1157	FLVHQQK	1030	7	dev-adult	0.056826	0	False	EBZ_1030.1_sets_embryo	0.0	1.0	0.0	0.0	0.0	0.0	0.0	1030.1	antisense;	ATQDRCYKDIRLLGRKNVVQSQTQSKTDRFLVHQQKLVGGWALKRAGRWWGHRVLLLPSDLPTIP	65	-1
1158	GQAVAKGRWR	1031	10	embryo.dev-embryo	0.0033311	0	False	EBZ_1031.1_sets_embryo	1.0	0.0	0.0	0.0	0.0	0.0	0.0	1031.1	intergenic;	NTWAWLVFAMCVRKRGQAVAKGRWRNGRRTNMQKWQSRFGSELLLIWFCDIKLPPLLVHKI	61	9
1159	LPPLLVHK	1031	8	embryo	0.13922	0	False	EBZ_1031.1_sets_embryo	1.0	0.0	0.0	0.0	0.0	0.0	0.0	1031.1	intergenic;	NTWAWLVFAMCVRKRGQAVAKGRWRNGRRTNMQKWQSRFGSELLLIWFCDIKLPPLLVHKI	61	9
1160	RGQAVAK	1031	7	dev-embryo	0.29158	0	False	EBZ_1031.1_sets_embryo	1.0	0.0	0.0	0.0	0.0	0.0	0.0	1031.1	intergenic;	NTWAWLVFAMCVRKRGQAVAKGRWRNGRRTNMQKWQSRFGSELLLIWFCDIKLPPLLVHKI	61	9
1161	AMCFYHFGFSRR	1033	12	embryo	0.0012938	0	False	EBZ_1033.1_sets_embryo	0.0	1.0	0.0	0.0	0.0	0.0	0.0	1033.1	antisense;	AMCFYHFGFSRRTYQDSQRFAGHSTKLNLNFSLKEEQGAG	40	1
1162	LNLNFSLKEEQGAG	1033	14	embryo	0.99911	0	False	EBZ_1033.1_sets_embryo	0.0	1.0	0.0	0.0	0.0	0.0	0.0	1033.1	antisense;	AMCFYHFGFSRRTYQDSQRFAGHSTKLNLNFSLKEEQGAG	40	1
1163	TYQDSQRFAGHSTK	1033	14	dev-embryo	0.18839	0	False	EBZ_1033.1_sets_embryo	0.0	1.0	0.0	0.0	0.0	0.0	0.0	1033.1	antisense;	AMCFYHFGFSRRTYQDSQRFAGHSTKLNLNFSLKEEQGAG	40	1
1164	AYSIYIYIWEK	1041	11	embryo.dev-embryo	0.18744	0	False	EBZ_1041.1_sets_embryo	0.0	1.0	0.0	0.0	0.0	0.0	0.0	1041.1	antisense;	MLTYIDRYFRAYSIYIYIWEKVFKLRVGEKKTKMVGIQIDRI	42	0
1165	AYSIYIYIWEKVFK	1041	14	embryo	0.18903	0	False	EBZ_1041.1_sets_embryo	0.0	1.0	0.0	0.0	0.0	0.0	0.0	1041.1	antisense;	MLTYIDRYFRAYSIYIYIWEKVFKLRVGEKKTKMVGIQIDRI	42	0
1166	LTYIDRYFR	1041	9	embryo	0.17885	0	False	EBZ_1041.1_sets_embryo	0.0	1.0	0.0	0.0	0.0	0.0	0.0	1041.1	antisense;	MLTYIDRYFRAYSIYIYIWEKVFKLRVGEKKTKMVGIQIDRI	42	0
1167	LTYIDRYFRAYSIYIYIWEK	1041	20	embryo.dev-embryo	0.14384	0	False	EBZ_1041.1_sets_embryo	0.0	1.0	0.0	0.0	0.0	0.0	0.0	1041.1	antisense;	MLTYIDRYFRAYSIYIYIWEKVFKLRVGEKKTKMVGIQIDRI	42	0
1168	MLTYIDRYFRAYSIYIYIWEK	1041	21	embryo.dev-embryo	0.36954	0	False	EBZ_1041.1_sets_embryo	0.0	1.0	0.0	0.0	0.0	0.0	0.0	1041.1	antisense;	MLTYIDRYFRAYSIYIYIWEKVFKLRVGEKKTKMVGIQIDRI	42	0
1169	MVGIQIDR	1041	8	embryo	0.22207	0	False	EBZ_1041.1_sets_embryo	0.0	1.0	0.0	0.0	0.0	0.0	0.0	1041.1	antisense;	MLTYIDRYFRAYSIYIYIWEKVFKLRVGEKKTKMVGIQIDRI	42	0
1170	MVGIQIDRI	1041	9	embryo.dev-embryo	0.0032391	0	False	EBZ_1041.1_sets_embryo	0.0	1.0	0.0	0.0	0.0	0.0	0.0	1041.1	antisense;	MLTYIDRYFRAYSIYIYIWEKVFKLRVGEKKTKMVGIQIDRI	42	0
1171	YFRAYSIYIYIWEKVFK	1041	17	embryo	0.38868	0	False	EBZ_1041.1_sets_embryo	0.0	1.0	0.0	0.0	0.0	0.0	0.0	1041.1	antisense;	MLTYIDRYFRAYSIYIYIWEKVFKLRVGEKKTKMVGIQIDRI	42	0
1172	YFRAYSIYIYIWEK	1041	14	dev-embryo	0.19643	0	False	EBZ_1041.1_sets_embryo	0.0	1.0	0.0	0.0	0.0	0.0	0.0	1041.1	antisense;	MLTYIDRYFRAYSIYIYIWEKVFKLRVGEKKTKMVGIQIDRI	42	0
1173	IVLMPMEPPDLK	1042	12	embryo.dev-embryo.dev-adult	0.0040237	0	False	EBZ_1042.1_sets_embryo	0.0	0.0	1.0	0.0	1.0	0.0	0.0	1042.1	sense;intronic;	KIVLMPMEPPDLKRLSIRSEKKQTKKKSKPGY	32	4
1174	IVLMPMEPPDLKR	1042	13	embryo.dev-embryo	0.054019000000000005	0	False	EBZ_1042.1_sets_embryo	0.0	0.0	1.0	0.0	1.0	0.0	0.0	1042.1	sense;intronic;	KIVLMPMEPPDLKRLSIRSEKKQTKKKSKPGY	32	4
1175	KIVLMPMEPPDLK	1042	13	dev-embryo	0.14723	0	False	EBZ_1042.1_sets_embryo	0.0	0.0	1.0	0.0	1.0	0.0	0.0	1042.1	sense;intronic;	KIVLMPMEPPDLKRLSIRSEKKQTKKKSKPGY	32	4
1176	VECLEILSQNMLMK	1045	14	embryo	0.40704	0	False	EBZ_1045.1_sets_embryo	0.0	1.0	0.0	0.0	0.0	0.0	0.0	1045.1	antisense;	VTEIGKRVECLEILSQNMLMKANCRVMSA	29	17
1177	VECLEILSQNMLMKANCR	1045	18	embryo	0.23978	0	False	EBZ_1045.1_sets_embryo	0.0	1.0	0.0	0.0	0.0	0.0	0.0	1045.1	antisense;	VTEIGKRVECLEILSQNMLMKANCRVMSA	29	17
1178	VTEIGKRVECLEILSQNMLMK	1045	21	embryo	0.0010872	0	False	EBZ_1045.1_sets_embryo	0.0	1.0	0.0	0.0	0.0	0.0	0.0	1045.1	antisense;	VTEIGKRVECLEILSQNMLMKANCRVMSA	29	17
1179	HLFSTFNELAEGK	1086	13	embryo	0.0052216	0	False	EBZ_1086.1_sets_embryo	0.0	0.0	1.0	0.0	1.0	0.0	0.0	1086.1	sense;intronic;	RHASIRHLFSTFNELAEGKLAPHVSCHVI	29	-1
1180	KNAQQNVGENIK	1095	12	embryo.dev-embryo	0.0023284000000000004	0	False	EBZ_1095.1_sets_embryo	1.0	0.0	0.0	0.0	0.0	0.0	0.0	1095.1	intergenic;	SAPGNSPDIIYFKSRPVQSSALNGNHLFMPAFPRLTPPTTKKNAQQNVGENIKNVLHTILN	61	28
1181	LTPPTTKK	1095	8	embryo.dev-embryo	0.21506	0	False	EBZ_1095.1_sets_embryo	1.0	0.0	0.0	0.0	0.0	0.0	0.0	1095.1	intergenic;	SAPGNSPDIIYFKSRPVQSSALNGNHLFMPAFPRLTPPTTKKNAQQNVGENIKNVLHTILN	61	28
1182	SAPGNSPDIIYFK	1095	13	dev-embryo	0.1483	0	False	EBZ_1095.1_sets_embryo	1.0	0.0	0.0	0.0	0.0	0.0	0.0	1095.1	intergenic;	SAPGNSPDIIYFKSRPVQSSALNGNHLFMPAFPRLTPPTTKKNAQQNVGENIKNVLHTILN	61	28
1183	GNLETEKGQQKEVN	1096	14	embryo	0.22846	0	False	EBZ_1096.1_sets_embryo	1.0	0.0	0.0	0.0	0.0	0.0	0.0	1096.1	intergenic;	QQQQEHCLGQKKKKGNLETEKGQQKEVN	28	-1
1184	KGNLETEKGQQK	1096	12	embryo	0.34068000000000004	0	False	EBZ_1096.1_sets_embryo	1.0	0.0	0.0	0.0	0.0	0.0	0.0	1096.1	intergenic;	QQQQEHCLGQKKKKGNLETEKGQQKEVN	28	-1
1185	QQQQEHCLGQKKK	1096	13	embryo.PL	0.0010879000000000002	0	False	EBZ_1096.1_sets_embryo	1.0	0.0	0.0	0.0	0.0	0.0	0.0	1096.1	intergenic;	QQQQEHCLGQKKKKGNLETEKGQQKEVN	28	-1
1186	QQQQEHCLGQKK	1096	12	PL	0.12348	0	False	EBZ_1096.1_sets_embryo	1.0	0.0	0.0	0.0	0.0	0.0	0.0	1096.1	intergenic;	QQQQEHCLGQKKKKGNLETEKGQQKEVN	28	-1
1187	DLGTCKQFK	1097	9	embryo.dev-embryo	0.00331	0	False	EBZ_1097.1_sets_embryo	0.0	0.0	1.0	0.0	1.0	0.0	0.0	1097.1	sense;intronic;	GGKDLPFSEIKKQIYNRDLGTCKQFKLNISTSCASCSCNEKYIKLLEFF	49	-1
1188	DLGTCKQFKLNISTSCASCSCNEK	1097	24	embryo	0.17619	0	False	EBZ_1097.1_sets_embryo	0.0	0.0	1.0	0.0	1.0	0.0	0.0	1097.1	sense;intronic;	GGKDLPFSEIKKQIYNRDLGTCKQFKLNISTSCASCSCNEKYIKLLEFF	49	-1
1189	DLPFSEIK	1097	8	embryo	0.2191	0	False	EBZ_1097.1_sets_embryo	0.0	0.0	1.0	0.0	1.0	0.0	0.0	1097.1	sense;intronic;	GGKDLPFSEIKKQIYNRDLGTCKQFKLNISTSCASCSCNEKYIKLLEFF	49	-1
1190	DLPFSEIKK	1097	9	embryo.dev-embryo	0.11653	0	False	EBZ_1097.1_sets_embryo	0.0	0.0	1.0	0.0	1.0	0.0	0.0	1097.1	sense;intronic;	GGKDLPFSEIKKQIYNRDLGTCKQFKLNISTSCASCSCNEKYIKLLEFF	49	-1
1191	DLPFSEIKKQIYNR	1097	14	embryo	3.0062	0	False	EBZ_1097.1_sets_embryo	0.0	0.0	1.0	0.0	1.0	0.0	0.0	1097.1	sense;intronic;	GGKDLPFSEIKKQIYNRDLGTCKQFKLNISTSCASCSCNEKYIKLLEFF	49	-1
1192	QIYNRDLGTCK	1097	11	dev-embryo	0.20553	0	False	EBZ_1097.1_sets_embryo	0.0	0.0	1.0	0.0	1.0	0.0	0.0	1097.1	sense;intronic;	GGKDLPFSEIKKQIYNRDLGTCKQFKLNISTSCASCSCNEKYIKLLEFF	49	-1
1193	EFIMANQKDK	1105	10	dev-adult.embryo.dev-embryo.PL	0.0026294	0	False	EBZ_1105.1_sets_embryo.dev-adult	1.0	0.0	0.0	0.0	0.0	0.0	0.0	1105.1	intergenic;	EFIMANQKDKEKDKAHVCFFVKLYNIFTFYRRHPSSLYPFVMKRCFR	47	3
1194	EFIMANQKDKEK	1105	12	embryo	3.5823	0	False	EBZ_1105.1_sets_embryo.dev-adult	1.0	0.0	0.0	0.0	0.0	0.0	0.0	1105.1	intergenic;	EFIMANQKDKEKDKAHVCFFVKLYNIFTFYRRHPSSLYPFVMKRCFR	47	3
1195	EKDKAHVCFFVK	1105	12	embryo	3.7265	0	False	EBZ_1105.1_sets_embryo.dev-adult	1.0	0.0	0.0	0.0	0.0	0.0	0.0	1105.1	intergenic;	EFIMANQKDKEKDKAHVCFFVKLYNIFTFYRRHPSSLYPFVMKRCFR	47	3
1196	HPSSLYPFVMKRCFR	1105	15	embryo.dev-embryo.PL	0.36897	0	False	EBZ_1105.1_sets_embryo.dev-adult	1.0	0.0	0.0	0.0	0.0	0.0	0.0	1105.1	intergenic;	EFIMANQKDKEKDKAHVCFFVKLYNIFTFYRRHPSSLYPFVMKRCFR	47	3
1197	LYNIFTFYRR	1105	10	embryo	0.13526	0	False	EBZ_1105.1_sets_embryo.dev-adult	1.0	0.0	0.0	0.0	0.0	0.0	0.0	1105.1	intergenic;	EFIMANQKDKEKDKAHVCFFVKLYNIFTFYRRHPSSLYPFVMKRCFR	47	3
1198	DKAHVCFFVKLYNIFTFYR	1105	19	PL	0.17755	0	False	EBZ_1105.1_sets_embryo.dev-adult	1.0	0.0	0.0	0.0	0.0	0.0	0.0	1105.1	intergenic;	EFIMANQKDKEKDKAHVCFFVKLYNIFTFYRRHPSSLYPFVMKRCFR	47	3
1199	EFIMANQK	1105	8	dev-adult.PL	0.062495	0	False	EBZ_1105.1_sets_embryo.dev-adult	1.0	0.0	0.0	0.0	0.0	0.0	0.0	1105.1	intergenic;	EFIMANQKDKEKDKAHVCFFVKLYNIFTFYRRHPSSLYPFVMKRCFR	47	3
1200	RHPSSLYPFVMK	1105	12	dev-adult	0.5364899999999999	0	False	EBZ_1105.1_sets_embryo.dev-adult	1.0	0.0	0.0	0.0	0.0	0.0	0.0	1105.1	intergenic;	EFIMANQKDKEKDKAHVCFFVKLYNIFTFYRRHPSSLYPFVMKRCFR	47	3
1201	SEILLKGAFK	1116	10	dev-adult.embryo.dev-embryo.PL	8.905399999999999e-05	0	False	EBZ_1116.1_sets_embryo.dev-adult	0.0	0.0	1.0	0.0	1.0	0.0	0.0	1116.1	sense;intronic;	SEILLKGAFKAGSMHL	16	13
1202	LPVLHTPTVFFHQIR	1117	15	embryo	0.0036416	0	False	EBZ_1117.1_sets_embryo	0.0	1.0	2.0	0.0	2.0	0.0	0.0	1117.1	antisense;sense;intronic;	KGRLPVLHTPTVFFHQIRFIGVSSLTVIVSSAILDIPVIEPTCVRTLHPNINASTTHCLF	60	-1
1203	GMEAKLLNLIDFR	1126	13	embryo	0.0011255999999999998	0	False	EBZ_1126.1_sets_embryo	0.0	1.0	0.0	0.0	0.0	0.0	0.0	1126.1	antisense;	QIRRENDGTSAPRGMEAKLLNLIDFR	26	14
1204	IQETTGLQEAVETQR	1129	15	embryo	0.00058311	0	False	EBZ_1129.1_sets_embryo	0.0	0.0	1.0	1.0	0.0	0.0	0.0	1129.1	sense;exonic;	LQCLVQQCTAHFRFAFEDYGAVLHGHEIKYIGGLCGCLLLGFLRIQETTGLQEAVETQRSRRGGRTQVSS	70	-1
1205	IQETTGLQEAVETQRSRR	1129	18	embryo	0.14835	0	False	EBZ_1129.1_sets_embryo	0.0	0.0	1.0	1.0	0.0	0.0	0.0	1129.1	sense;exonic;	LQCLVQQCTAHFRFAFEDYGAVLHGHEIKYIGGLCGCLLLGFLRIQETTGLQEAVETQRSRRGGRTQVSS	70	-1
1206	YIGGLCGCLLLGFLRIQETTGLQEAVETQRSR	1129	32	embryo	0.23762	0	False	EBZ_1129.1_sets_embryo	0.0	0.0	1.0	1.0	0.0	0.0	0.0	1129.1	sense;exonic;	LQCLVQQCTAHFRFAFEDYGAVLHGHEIKYIGGLCGCLLLGFLRIQETTGLQEAVETQRSRRGGRTQVSS	70	-1
1207	ASAQSHIHLSQPATR	1133	15	embryo	0.22738000000000005	0	False	EBZ_1133.1_sets_PL.embryo	0.0	0.0	1.0	0.0	1.0	1.0	0.0	1133.1	sense;intronic;fiveUTR;	ASAQSHIHLSQPATRPTGGGAAASIENSLFRAQ	33	-1
1208	PTGGGAAASIENSLFR	1133	16	dev-adult.embryo.dev-embryo.PL	0.00077058	0	False	EBZ_1133.1_sets_PL.embryo	0.0	0.0	1.0	0.0	1.0	1.0	0.0	1133.1	sense;intronic;fiveUTR;	ASAQSHIHLSQPATRPTGGGAAASIENSLFRAQ	33	-1
1209	PTGGGAAASIENSLFRAQ	1133	18	embryo.dev-adult	0.19068	0	False	EBZ_1133.1_sets_PL.embryo	0.0	0.0	1.0	0.0	1.0	1.0	0.0	1133.1	sense;intronic;fiveUTR;	ASAQSHIHLSQPATRPTGGGAAASIENSLFRAQ	33	-1
1210	VSALAWASVEEELR	1141	14	embryo.dev-adult	0.00030434	0	False	EBZ_1141.1_sets_embryo	0.0	1.0	0.0	0.0	0.0	0.0	0.0	1141.1	antisense;	VSALAWASVEEELRDNYVAHARVSTVV	27	-1
1211	VSALAWASVEEELRDNYVAHAR	1141	22	embryo.dev-adult	0.22722	0	False	EBZ_1141.1_sets_embryo	0.0	1.0	0.0	0.0	0.0	0.0	0.0	1141.1	antisense;	VSALAWASVEEELRDNYVAHARVSTVV	27	-1
1212	KAFWSLYTHLFWNRSR	1144	16	embryo	0.39092	0	False	EBZ_1144.1_sets_embryo	1.0	0.0	0.0	0.0	0.0	0.0	0.0	1144.1	intergenic;	HASLCVYVCVLVPYMAKYKNNIYMLTKIVKKAFWSLYTHLFWNRSRAAEMRNMKNIRATAKIF	63	14
1213	YKNNIYMLTKIVK	1144	13	embryo	0.00028304	0	False	EBZ_1144.1_sets_embryo	1.0	0.0	0.0	0.0	0.0	0.0	0.0	1144.1	intergenic;	HASLCVYVCVLVPYMAKYKNNIYMLTKIVKKAFWSLYTHLFWNRSRAAEMRNMKNIRATAKIF	63	14
1214	GKSEICMLRDFR	1146	12	embryo	0.0022447	0	False	EBZ_1146.1_sets_embryo	0.0	1.0	0.0	0.0	0.0	0.0	0.0	1146.1	antisense;	GKSEICMLRDFRRWMHSSATYCCP	24	6
1215	FPVQGFMFTHKTK	1147	13	embryo.dev-embryo	0.0033085	0	False	EBZ_1147.1_sets_embryo	0.0	1.0	0.0	0.0	0.0	0.0	0.0	1147.1	antisense;	FPVQGFMFTHKTKHRAEHSSINIFGFSALQFVEICIF	37	6
1216	TKHRAEHSSINIFGFSALQFVEICIF	1147	26	embryo	0.17753	0	False	EBZ_1147.1_sets_embryo	0.0	1.0	0.0	0.0	0.0	0.0	0.0	1147.1	antisense;	FPVQGFMFTHKTKHRAEHSSINIFGFSALQFVEICIF	37	6
1217	GAVMKATFGLPDIQWQLGEDGQQER	1153	25	embryo.dev-embryo	0.0016691	0	False	EBZ_1153.1_sets_embryo	1.0	0.0	0.0	0.0	0.0	0.0	0.0	1153.1	intergenic;	GAVMKATFGLPDIQWQLGEDGQQERASPATKVSHSCL	37	3
1218	NENNPNRNDLMR	1158	12	dev-adult.embryo.dev-embryo.PL	0.0015658	0	False	EBZ_1158.1_sets_embryo	0.0	0.0	1.0	0.0	0.0	1.0	0.0	1158.1	sense;fiveUTR;	KMAIRGENKQYLAKRNENNPNRNDLMRLTSLQQKKRT	37	1
1219	RNENNPNR	1158	8	embryo	1.8152	0	False	EBZ_1158.1_sets_embryo	0.0	0.0	1.0	0.0	0.0	1.0	0.0	1158.1	sense;fiveUTR;	KMAIRGENKQYLAKRNENNPNRNDLMRLTSLQQKKRT	37	1
1220	LTSLQQK	1158	7	dev-embryo.PL	0.15675	0	False	EBZ_1158.1_sets_embryo	0.0	0.0	1.0	0.0	0.0	1.0	0.0	1158.1	sense;fiveUTR;	KMAIRGENKQYLAKRNENNPNRNDLMRLTSLQQKKRT	37	1
1221	NENNPNRNDLMRLTSLQQK	1158	19	PL	0.35169	0	False	EBZ_1158.1_sets_embryo	0.0	0.0	1.0	0.0	0.0	1.0	0.0	1158.1	sense;fiveUTR;	KMAIRGENKQYLAKRNENNPNRNDLMRLTSLQQKKRT	37	1
1222	LQEINHKSSWKETISS	1159	16	embryo	3.712	0	False	EBZ_1159.1_sets_embryo.dev-embryo	0.0	1.0	0.0	0.0	0.0	0.0	0.0	1159.1	antisense;	VSDFEIEQNQNKPYLRLTRLQEINHKSSWKETISS	35	-1
1223	VSDFEIEQNQNK	1159	12	embryo.dev-embryo.PL	0.00042004	0	False	EBZ_1159.1_sets_embryo.dev-embryo	0.0	1.0	0.0	0.0	0.0	0.0	0.0	1159.1	antisense;	VSDFEIEQNQNKPYLRLTRLQEINHKSSWKETISS	35	-1
1224	LQEINHKSSWK	1159	11	dev-embryo.PL	0.73542	0	False	EBZ_1159.1_sets_embryo.dev-embryo	0.0	1.0	0.0	0.0	0.0	0.0	0.0	1159.1	antisense;	VSDFEIEQNQNKPYLRLTRLQEINHKSSWKETISS	35	-1
1225	LTRLQEINHK	1159	10	PL	0.1651	0	False	EBZ_1159.1_sets_embryo.dev-embryo	0.0	1.0	0.0	0.0	0.0	0.0	0.0	1159.1	antisense;	VSDFEIEQNQNKPYLRLTRLQEINHKSSWKETISS	35	-1
1226	MQVYPETTIQNK	1162	12	embryo	0.14467	0	False	EBZ_1162.1_sets_embryo	0.0	0.0	1.0	0.0	1.0	0.0	0.0	1162.1	sense;intronic;	TGAVRMQVYPETTIQNKQ	18	5
1227	TGAVRMQVYPETTIQNK	1162	17	embryo.PL	0.014306	0	False	EBZ_1162.1_sets_embryo	0.0	0.0	1.0	0.0	1.0	0.0	0.0	1162.1	sense;intronic;	TGAVRMQVYPETTIQNKQ	18	5
1228	IIFLNHIEVFCK	1188	12	dev-adult.embryo.dev-embryo.PL	9.4983e-05	0	False	EBZ_1188.1_sets_embryo.dev-adult.dev-embryo	0.0	0.0	1.0	0.0	1.0	0.0	0.0	1188.1	sense;intronic;	IIFLNHIEVFCKNTILLRNIRFSYNNKIFENF	32	-1
1229	NIRFSYNNKIFENF	1188	14	embryo	0.3722	0	False	EBZ_1188.1_sets_embryo.dev-adult.dev-embryo	0.0	0.0	1.0	0.0	1.0	0.0	0.0	1188.1	sense;intronic;	IIFLNHIEVFCKNTILLRNIRFSYNNKIFENF	32	-1
1230	FSGCFGSKFICSRR	1197	14	embryo	0.39009	0	False	EBZ_1197.1_sets_embryo	0.0	0.0	1.0	0.0	1.0	0.0	0.0	1197.1	sense;intronic;	SIIISLSRFSGCFGSKFICSRRNESQSHLYSNWNNTGNRRPFTIFAAVNGSPQR	54	-1
1231	NESQSHLYSNWNNTGNR	1197	17	embryo	0.14199	0	False	EBZ_1197.1_sets_embryo	0.0	0.0	1.0	0.0	1.0	0.0	0.0	1197.1	sense;intronic;	SIIISLSRFSGCFGSKFICSRRNESQSHLYSNWNNTGNRRPFTIFAAVNGSPQR	54	-1
1232	PFTIFAAVNGSPQR	1197	14	embryo	0.14648	0	False	EBZ_1197.1_sets_embryo	0.0	0.0	1.0	0.0	1.0	0.0	0.0	1197.1	sense;intronic;	SIIISLSRFSGCFGSKFICSRRNESQSHLYSNWNNTGNRRPFTIFAAVNGSPQR	54	-1
1233	SIIISLSR	1197	8	embryo	0.43621	0	False	EBZ_1197.1_sets_embryo	0.0	0.0	1.0	0.0	1.0	0.0	0.0	1197.1	sense;intronic;	SIIISLSRFSGCFGSKFICSRRNESQSHLYSNWNNTGNRRPFTIFAAVNGSPQR	54	-1
1234	SIIISLSRFSGCFGSK	1197	16	embryo	0.0049992	0	False	EBZ_1197.1_sets_embryo	0.0	0.0	1.0	0.0	1.0	0.0	0.0	1197.1	sense;intronic;	SIIISLSRFSGCFGSKFICSRRNESQSHLYSNWNNTGNRRPFTIFAAVNGSPQR	54	-1
1235	QAILGNTNQYLFK	1199	13	embryo	0.004174100000000001	0	False	EBZ_1199.1_sets_embryo	0.0	0.0	1.0	1.0	0.0	0.0	1.0	1199.1	sense;exonic;threeUTR;	LLNTTKHYPLIYNILMSRKQEKQAILGNTNQYLFKTPQIPQL	42	15
1236	QEKQAILGNTNQYLFKTPQIPQL	1199	23	dev-embryo	0.1645	0	False	EBZ_1199.1_sets_embryo	0.0	0.0	1.0	1.0	0.0	0.0	1.0	1199.1	sense;exonic;threeUTR;	LLNTTKHYPLIYNILMSRKQEKQAILGNTNQYLFKTPQIPQL	42	15
1237	LWIFKCSLRNCDK	1200	13	embryo.dev-embryo	0.34626	0	False	EBZ_1200.1_sets_embryo	0.0	1.0	0.0	0.0	0.0	0.0	0.0	1200.1	antisense;	QTTGSIIIAMPQSSSASKLWIFKCSLRNCDKCR	33	9
1238	QTTGSIIIAMPQSSSASK	1200	18	embryo.dev-embryo	0.0040301	0	False	EBZ_1200.1_sets_embryo	0.0	1.0	0.0	0.0	0.0	0.0	0.0	1200.1	antisense;	QTTGSIIIAMPQSSSASKLWIFKCSLRNCDKCR	33	9
1239	QTTGSIIIAMPQSSSASKLWIFK	1200	23	dev-embryo	0.21109	0	False	EBZ_1200.1_sets_embryo	0.0	1.0	0.0	0.0	0.0	0.0	0.0	1200.1	antisense;	QTTGSIIIAMPQSSSASKLWIFKCSLRNCDKCR	33	9
1240	FVSSETP	1202	7	embryo	2.4906	0	False	EBZ_1202.1_sets_embryo	0.0	0.0	1.0	0.0	1.0	0.0	0.0	1202.1	sense;intronic;	PTTLETVNVCQANLARAPEIFSGDCLTFDGFMHLVIRFVSSETP	44	31
1241	PTTLETVNVCQANLAR	1202	16	embryo.dev-embryo.PL	0.00072916	0	False	EBZ_1202.1_sets_embryo	0.0	0.0	1.0	0.0	1.0	0.0	0.0	1202.1	sense;intronic;	PTTLETVNVCQANLARAPEIFSGDCLTFDGFMHLVIRFVSSETP	44	31
1242	PTTLETVNVCQANLARAPEIFSGDCLTFDGFMHLVIR	1202	37	embryo	0.14981	0	False	EBZ_1202.1_sets_embryo	0.0	0.0	1.0	0.0	1.0	0.0	0.0	1202.1	sense;intronic;	PTTLETVNVCQANLARAPEIFSGDCLTFDGFMHLVIRFVSSETP	44	31
1243	APEIFSGDCLTFDGFMHLVIR	1202	21	PL	0.1674	0	False	EBZ_1202.1_sets_embryo	0.0	0.0	1.0	0.0	1.0	0.0	0.0	1202.1	sense;intronic;	PTTLETVNVCQANLARAPEIFSGDCLTFDGFMHLVIRFVSSETP	44	31
1244	IKLNADFQR	1203	9	embryo.dev-embryo	0.00071642	0	False	EBZ_1203.1_sets_embryo.dev-embryo	0.0	0.0	1.0	0.0	1.0	0.0	0.0	1203.1	sense;intronic;	EKIPNMFIKIKLNADFQRLFYFNSIHCDTKPS	32	5
1245	IKLNADFQRLFYFNSIHCDTK	1203	21	embryo	0.16835999999999998	0	False	EBZ_1203.1_sets_embryo.dev-embryo	0.0	0.0	1.0	0.0	1.0	0.0	0.0	1203.1	sense;intronic;	EKIPNMFIKIKLNADFQRLFYFNSIHCDTKPS	32	5
1246	LFYFNSIHCDTK	1203	12	embryo	0.13457	0	False	EBZ_1203.1_sets_embryo.dev-embryo	0.0	0.0	1.0	0.0	1.0	0.0	0.0	1203.1	sense;intronic;	EKIPNMFIKIKLNADFQRLFYFNSIHCDTKPS	32	5
1247	ADVTGSDRDAK	1205	11	dev-adult.embryo.dev-embryo.PL	6.4543e-05	0	False	EBZ_1205.1_sets_PL.embryo.dev-embryo	1.0	0.0	0.0	0.0	0.0	0.0	0.0	1205.1	intergenic;	ADVTGSDRDAKRSNGADTSAPSKS	24	-1
1248	SNGADTSAPSKS	1205	12	embryo	0.51595	0	False	EBZ_1205.1_sets_PL.embryo.dev-embryo	1.0	0.0	0.0	0.0	0.0	0.0	0.0	1205.1	intergenic;	ADVTGSDRDAKRSNGADTSAPSKS	24	-1
1249	MVGGVISQHQTVKLK	1218	15	embryo	0.17911	0	False	EBZ_1218.1_sets_PL.embryo.dev-embryo	1.0	0.0	0.0	0.0	0.0	0.0	0.0	1218.1	intergenic;	MVGGVISQHQTVKLKN	16	0
1250	VGGVISQHQTVK	1218	12	embryo.dev-embryo.PL	5.158e-05	0	False	EBZ_1218.1_sets_PL.embryo.dev-embryo	1.0	0.0	0.0	0.0	0.0	0.0	0.0	1218.1	intergenic;	MVGGVISQHQTVKLKN	16	0
1251	AFVLAHMHTKHR	1222	12	embryo	0.0033016999999999994	0	False	EBZ_1222.1_sets_embryo	0.0	1.0	0.0	0.0	0.0	0.0	0.0	1222.1	antisense;	AFVLAHMHTKHRHEHTEVFTANYILQLFHAILICRLALAHTLTLWLLT	48	6
1252	HEHTEVFTANYILQLFHAILICR	1222	23	embryo.PL	0.16894	0	False	EBZ_1222.1_sets_embryo	0.0	1.0	0.0	0.0	0.0	0.0	0.0	1222.1	antisense;	AFVLAHMHTKHRHEHTEVFTANYILQLFHAILICRLALAHTLTLWLLT	48	6
1253	AFVLAHMHTK	1222	10	PL	0.12215	0	False	EBZ_1222.1_sets_embryo	0.0	1.0	0.0	0.0	0.0	0.0	0.0	1222.1	antisense;	AFVLAHMHTKHRHEHTEVFTANYILQLFHAILICRLALAHTLTLWLLT	48	6
1254	AAFEQTAR	1256	8	embryo.dev-embryo.dev-adult	0.034512	0	False	EBZ_1256.1_sets_embryo	0.0	0.0	1.0	1.0	0.0	0.0	0.0	1256.1	sense;exonic;	MAAFEQTARLSAVSQLSGHTIGQYIHRRGQ	30	0
1255	LSAVSQLSGHTIGQYIHR	1256	18	embryo.dev-embryo.PL	0.022537	0	False	EBZ_1256.1_sets_embryo	0.0	0.0	1.0	1.0	0.0	0.0	0.0	1256.1	sense;exonic;	MAAFEQTARLSAVSQLSGHTIGQYIHRRGQ	30	0
1256	LSAVSQLSGHTIGQYIHRR	1256	19	embryo.dev-embryo.PL	0.0099526	0	False	EBZ_1256.1_sets_embryo	0.0	0.0	1.0	1.0	0.0	0.0	0.0	1256.1	sense;exonic;	MAAFEQTARLSAVSQLSGHTIGQYIHRRGQ	30	0
1257	MAAFEQTARLSAVSQLSGHTIGQYIHRR	1256	28	PL	0.40536	0	False	EBZ_1256.1_sets_embryo	0.0	0.0	1.0	1.0	0.0	0.0	0.0	1256.1	sense;exonic;	MAAFEQTARLSAVSQLSGHTIGQYIHRRGQ	30	0
1258	CPFFWGHFM	1263	9	embryo	0.15822999999999998	0	False	EBZ_1263.1_sets_embryo	0.0	0.0	1.0	0.0	1.0	0.0	0.0	1263.1	sense;intronic;	IEALMETAETGSRVKKCPFFWGHFM	25	4
1259	IEALMETAETGSR	1263	13	dev-adult.embryo.dev-embryo.PL	0.00020759	0	False	EBZ_1263.1_sets_embryo	0.0	0.0	1.0	0.0	1.0	0.0	0.0	1263.1	sense;intronic;	IEALMETAETGSRVKKCPFFWGHFM	25	4
1260	IEALMETAETGSRVKK	1263	16	embryo.PL	0.35626	0	False	EBZ_1263.1_sets_embryo	0.0	0.0	1.0	0.0	1.0	0.0	0.0	1263.1	sense;intronic;	IEALMETAETGSRVKKCPFFWGHFM	25	4
1261	IEALMETAETGSRVK	1263	15	PL	1.0642	0	False	EBZ_1263.1_sets_embryo	0.0	0.0	1.0	0.0	1.0	0.0	0.0	1263.1	sense;intronic;	IEALMETAETGSRVKKCPFFWGHFM	25	4
1262	VKKCPFFWGHFM	1263	12	PL	2.9287	0	False	EBZ_1263.1_sets_embryo	0.0	0.0	1.0	0.0	1.0	0.0	0.0	1263.1	sense;intronic;	IEALMETAETGSRVKKCPFFWGHFM	25	4
1263	INLTWAAVPTPTPPSYHQR	1271	19	dev-adult.embryo.dev-embryo.PL	5.9803e-05	0	False	EBZ_1271.1_sets_PL.embryo	0.0	0.0	1.0	0.0	1.0	0.0	0.0	1271.1	sense;intronic;	INLTWAAVPTPTPPSYHQRNSTPTLSP	27	-1
1264	QRFTNTSFIIHIASEENTSGEK	1273	22	embryo	0.0012188	0	False	EBZ_1273.1_sets_embryo	0.0	1.0	0.0	0.0	0.0	0.0	0.0	1273.1	antisense;	QRFTNTSFIIHIASEENTSGEK	22	-1
1265	GFNNYILENNR	1289	11	embryo.dev-embryo	0.00042921	0	False	EBZ_1289.1_sets_embryo.dev-embryo	0.0	1.0	0.0	0.0	0.0	0.0	0.0	1289.1	antisense;	GFNNYILENNRLLNVSFYESNFYKADE	27	-1
1266	GFNNYILENNRLLNVSFYESNFYK	1289	24	embryo	0.18266	0	False	EBZ_1289.1_sets_embryo.dev-embryo	0.0	1.0	0.0	0.0	0.0	0.0	0.0	1289.1	antisense;	GFNNYILENNRLLNVSFYESNFYKADE	27	-1
1267	HTQMQYTRLEQGSIWRSTE	1293	19	embryo.PL	0.23813	0	False	EBZ_1293.1_sets_embryo.dev-embryo	0.0	1.0	0.0	0.0	0.0	0.0	0.0	1293.1	antisense;	LYFSPSSRVLGLRHTQMQYTRLEQGSIWRSTE	32	16
1268	LEQGSIWR	1293	8	embryo.PL	0.096668	0	False	EBZ_1293.1_sets_embryo.dev-embryo	0.0	1.0	0.0	0.0	0.0	0.0	0.0	1293.1	antisense;	LYFSPSSRVLGLRHTQMQYTRLEQGSIWRSTE	32	16
1269	LYFSPSSRVLGLRHTQMQYTR	1293	21	embryo	0.36516	0	False	EBZ_1293.1_sets_embryo.dev-embryo	0.0	1.0	0.0	0.0	0.0	0.0	0.0	1293.1	antisense;	LYFSPSSRVLGLRHTQMQYTRLEQGSIWRSTE	32	16
1270	VLGLRHTQMQYTR	1293	13	embryo.dev-embryo.PL	0.0056669	0	False	EBZ_1293.1_sets_embryo.dev-embryo	0.0	1.0	0.0	0.0	0.0	0.0	0.0	1293.1	antisense;	LYFSPSSRVLGLRHTQMQYTRLEQGSIWRSTE	32	16
1271	IECLCHRIEK	1294	10	dev-adult.embryo.dev-embryo.PL	0.00073829	0	False	EBZ_1294.1_sets_embryo	0.0	0.0	1.0	0.0	1.0	0.0	0.0	1294.1	sense;intronic;	IYANLRLISPGYLLGSRLELAMQENPNRIECLCHRIEKQLDCGKKSKTHLEQLAKCQKLRL	61	21
1272	IECLCHRIEKQLDCGK	1294	16	embryo.dev-embryo	0.21935	0	False	EBZ_1294.1_sets_embryo	0.0	0.0	1.0	0.0	1.0	0.0	0.0	1294.1	sense;intronic;	IYANLRLISPGYLLGSRLELAMQENPNRIECLCHRIEKQLDCGKKSKTHLEQLAKCQKLRL	61	21
1273	IYANLRLISPGYLLGSR	1294	17	embryo	0.21115	0	False	EBZ_1294.1_sets_embryo	0.0	0.0	1.0	0.0	1.0	0.0	0.0	1294.1	sense;intronic;	IYANLRLISPGYLLGSRLELAMQENPNRIECLCHRIEKQLDCGKKSKTHLEQLAKCQKLRL	61	21
1274	THLEQLAK	1294	8	embryo	0.12391	0	False	EBZ_1294.1_sets_embryo	0.0	0.0	1.0	0.0	1.0	0.0	0.0	1294.1	sense;intronic;	IYANLRLISPGYLLGSRLELAMQENPNRIECLCHRIEKQLDCGKKSKTHLEQLAKCQKLRL	61	21
1275	LELAMQENPNRIECLCHR	1294	18	PL	0.21125	0	False	EBZ_1294.1_sets_embryo	0.0	0.0	1.0	0.0	1.0	0.0	0.0	1294.1	sense;intronic;	IYANLRLISPGYLLGSRLELAMQENPNRIECLCHRIEKQLDCGKKSKTHLEQLAKCQKLRL	61	21
1276	AFQLIPEHTER	1301	11	dev-adult.embryo.dev-embryo.PL	8.4819e-05	0	False	EBZ_1301.1_sets_embryo.dev-adult.dev-embryo	1.0	0.0	0.0	0.0	0.0	0.0	0.0	1301.1	intergenic;	AFQLIPEHTERNPISCPMVWFFLSHSVSFVLE	32	17
1277	IWLFQMSSFSVCFPCK	1318	16	embryo	0.13230999999999998	0	False	EBZ_1318.1_sets_embryo	0.0	1.0	0.0	0.0	0.0	0.0	0.0	1318.1	antisense;	NGPRIWLFQMSSFSVCFPCKLMSIKAAVAAATSRP	35	9
1278	LMSIKAAVAAATSR	1318	14	embryo	0.009764	0	False	EBZ_1318.1_sets_embryo	0.0	1.0	0.0	0.0	0.0	0.0	0.0	1318.1	antisense;	NGPRIWLFQMSSFSVCFPCKLMSIKAAVAAATSRP	35	9
1279	FPRVPASVR	1330	9	dev-adult.embryo.dev-embryo.PL	0.00096544	0	False	EBZ_1330.1_sets_PL.embryo	0.0	0.0	1.0	0.0	1.0	0.0	0.0	1330.1	sense;intronic;	FPRVPASVRRRKNMLHFGGANSMLFVFVEVSRPN	34	13
1280	KNMLHFGGANSMLFVFVEVSR	1330	21	embryo	0.13733	0	False	EBZ_1330.1_sets_PL.embryo	0.0	0.0	1.0	0.0	1.0	0.0	0.0	1330.1	sense;intronic;	FPRVPASVRRRKNMLHFGGANSMLFVFVEVSRPN	34	13
1281	NMLHFGGANSMLFVFVEVSRPN	1330	22	embryo	0.20725	0	False	EBZ_1330.1_sets_PL.embryo	0.0	0.0	1.0	0.0	1.0	0.0	0.0	1330.1	sense;intronic;	FPRVPASVRRRKNMLHFGGANSMLFVFVEVSRPN	34	13
1282	VPASVRR	1330	7	embryo	1.7729	0	False	EBZ_1330.1_sets_PL.embryo	0.0	0.0	1.0	0.0	1.0	0.0	0.0	1330.1	sense;intronic;	FPRVPASVRRRKNMLHFGGANSMLFVFVEVSRPN	34	13
1283	VPASVRRR	1330	8	dev-embryo	0.53115	0	False	EBZ_1330.1_sets_PL.embryo	0.0	0.0	1.0	0.0	1.0	0.0	0.0	1330.1	sense;intronic;	FPRVPASVRRRKNMLHFGGANSMLFVFVEVSRPN	34	13
1284	TTSCDQKSPIVVMFTLLITLMP	1331	22	embryo	0.0017727	0	False	EBZ_1331.1_sets_embryo	1.0	0.0	0.0	0.0	0.0	0.0	0.0	1331.1	intergenic;	TTSCDQKSPIVVMFTLLITLMP	22	12
1285	HGLMVLNEPSSR	1343	12	embryo.dev-embryo	0.00012606	0	False	EBZ_1343.1_sets_embryo.dev-embryo	0.0	1.0	0.0	0.0	0.0	0.0	0.0	1343.1	antisense;	HGLMVLNEPSSRPSSARLPWILKLQSFSRIL	31	3
1286	PSSARLPWILK	1343	11	embryo	1.0646	0	False	EBZ_1343.1_sets_embryo.dev-embryo	0.0	1.0	0.0	0.0	0.0	0.0	0.0	1343.1	antisense;	HGLMVLNEPSSRPSSARLPWILKLQSFSRIL	31	3
1287	IFLSLWIDSSHWFGLELKMIIKSK	1346	24	embryo	0.17598	0	False	EBZ_1346.1_sets_PL.embryo.dev-adult	1.0	0.0	0.0	0.0	0.0	0.0	0.0	1346.1	intergenic;	LSVVGGMHNTFADRNQNMFTFARRWQKLVLAQGFPSSDGKATGGRVKRIFLSLWIDSSHWFGLELKMIIKSKSSLFLHSFSHY	83	6
1288	LSVVGGMHNTFADRNQNMFTFARR	1346	24	dev-adult.embryo.dev-embryo.PL	0.00061927	0	False	EBZ_1346.1_sets_PL.embryo.dev-adult	1.0	0.0	0.0	0.0	0.0	0.0	0.0	1346.1	intergenic;	LSVVGGMHNTFADRNQNMFTFARRWQKLVLAQGFPSSDGKATGGRVKRIFLSLWIDSSHWFGLELKMIIKSKSSLFLHSFSHY	83	6
1289	LVLAQGFPSSDGK	1346	13	dev-adult.embryo.dev-embryo.PL	0.12949000000000002	0	False	EBZ_1346.1_sets_PL.embryo.dev-adult	1.0	0.0	0.0	0.0	0.0	0.0	0.0	1346.1	intergenic;	LSVVGGMHNTFADRNQNMFTFARRWQKLVLAQGFPSSDGKATGGRVKRIFLSLWIDSSHWFGLELKMIIKSKSSLFLHSFSHY	83	6
1290	NQNMFTFAR	1346	9	embryo	0.41882	0	False	EBZ_1346.1_sets_PL.embryo.dev-adult	1.0	0.0	0.0	0.0	0.0	0.0	0.0	1346.1	intergenic;	LSVVGGMHNTFADRNQNMFTFARRWQKLVLAQGFPSSDGKATGGRVKRIFLSLWIDSSHWFGLELKMIIKSKSSLFLHSFSHY	83	6
1291	NQNMFTFARRWQK	1346	13	embryo	0.36498	0	False	EBZ_1346.1_sets_PL.embryo.dev-adult	1.0	0.0	0.0	0.0	0.0	0.0	0.0	1346.1	intergenic;	LSVVGGMHNTFADRNQNMFTFARRWQKLVLAQGFPSSDGKATGGRVKRIFLSLWIDSSHWFGLELKMIIKSKSSLFLHSFSHY	83	6
1292	LVLAQGFPSSDGKATGGR	1346	18	dev-adult	0.21438	0	False	EBZ_1346.1_sets_PL.embryo.dev-adult	1.0	0.0	0.0	0.0	0.0	0.0	0.0	1346.1	intergenic;	LSVVGGMHNTFADRNQNMFTFARRWQKLVLAQGFPSSDGKATGGRVKRIFLSLWIDSSHWFGLELKMIIKSKSSLFLHSFSHY	83	6
1293	IYFIYVSVIFMTLMSVR	1348	17	embryo	0.467	0	False	EBZ_1348.1_sets_embryo	1.0	0.0	0.0	0.0	0.0	0.0	0.0	1348.1	intergenic;	IYFIYVSVIFMTLMSVRPFSPNVFGYNFQFFDMLILKLEA	40	10
1294	IYFIYVSVIFMTLMSVRPFSPNVFGYNFQFFDMLILK	1348	37	embryo	0.0026857	0	False	EBZ_1348.1_sets_embryo	1.0	0.0	0.0	0.0	0.0	0.0	0.0	1348.1	intergenic;	IYFIYVSVIFMTLMSVRPFSPNVFGYNFQFFDMLILKLEA	40	10
1295	SVEQCTAWDVAKR	1352	13	embryo.PL	0.17949	0	False	EBZ_1352.1_sets_embryo	1.0	0.0	0.0	0.0	0.0	0.0	0.0	1352.1	intergenic;	IGAETKGNRWIYWKFENGFLGRRSKPSKVKSVEQCTAWDVAKRARKTVAVLSMFFLIF	58	52
1296	TVAVLSMFFLIF	1352	12	dev-adult.embryo.PL	0.11776	0	False	EBZ_1352.1_sets_embryo	1.0	0.0	0.0	0.0	0.0	0.0	0.0	1352.1	intergenic;	IGAETKGNRWIYWKFENGFLGRRSKPSKVKSVEQCTAWDVAKRARKTVAVLSMFFLIF	58	52
1297	VKSVEQCTAWDVAK	1352	14	embryo.PL	0.0014691	0	False	EBZ_1352.1_sets_embryo	1.0	0.0	0.0	0.0	0.0	0.0	0.0	1352.1	intergenic;	IGAETKGNRWIYWKFENGFLGRRSKPSKVKSVEQCTAWDVAKRARKTVAVLSMFFLIF	58	52
1298	WIYWKFENGFLGRR	1352	14	embryo	0.36242	0	False	EBZ_1352.1_sets_embryo	1.0	0.0	0.0	0.0	0.0	0.0	0.0	1352.1	intergenic;	IGAETKGNRWIYWKFENGFLGRRSKPSKVKSVEQCTAWDVAKRARKTVAVLSMFFLIF	58	52
1299	IGAETKGNR	1352	9	dev-adult	0.02223	0	False	EBZ_1352.1_sets_embryo	1.0	0.0	0.0	0.0	0.0	0.0	0.0	1352.1	intergenic;	IGAETKGNRWIYWKFENGFLGRRSKPSKVKSVEQCTAWDVAKRARKTVAVLSMFFLIF	58	52
1300	SLFFVCLLNIYHSR	1353	14	embryo.PL	0.08654099999999999	0	False	EBZ_1353.1_sets_embryo	0.0	0.0	1.0	0.0	1.0	0.0	0.0	1353.1	sense;intronic;	TSESQHFFMAPKRSLFFVCLLNIYHSR	27	8
1301	TSESQHFFMAPKR	1353	13	embryo	0.0075366	0	False	EBZ_1353.1_sets_embryo	0.0	0.0	1.0	0.0	1.0	0.0	0.0	1353.1	sense;intronic;	TSESQHFFMAPKRSLFFVCLLNIYHSR	27	8
1302	TSESQHFFMAPKRSLFFVCLLNIYHSR	1353	27	embryo	0.17347	0	False	EBZ_1353.1_sets_embryo	0.0	0.0	1.0	0.0	1.0	0.0	0.0	1353.1	sense;intronic;	TSESQHFFMAPKRSLFFVCLLNIYHSR	27	8
1303	RSLFFVCLLNIYHSR	1353	15	PL	0.15020999999999998	0	False	EBZ_1353.1_sets_embryo	0.0	0.0	1.0	0.0	1.0	0.0	0.0	1353.1	sense;intronic;	TSESQHFFMAPKRSLFFVCLLNIYHSR	27	8
1304	RSIFEIHISR	1356	10	embryo	0.18243	0	False	EBZ_1356.1_sets_embryo	0.0	1.0	0.0	0.0	0.0	0.0	0.0	1356.1	antisense;	NRKRRRRSIFEIHISRHFYKH	21	-1
1305	SIFEIHISRHFYK	1356	13	embryo	0.008893999999999999	0	False	EBZ_1356.1_sets_embryo	0.0	1.0	0.0	0.0	0.0	0.0	0.0	1356.1	antisense;	NRKRRRRSIFEIHISRHFYKH	21	-1
1306	VISALKRMPSSEVSHK	1366	16	embryo.dev-adult	0.0082023	0	False	EBZ_1366.1_sets_embryo	1.0	0.0	0.0	0.0	0.0	0.0	0.0	1366.1	intergenic;	SEAKLARFPALRVCGPQSNEVCISFCANCFHTFLLAFPIVIAKSVKFEWQLLFNHCRVISALKRMPSSEVSHKRQMLSG	79	64
1307	LSILLVCEMSLWLCVLVQKNPK	1369	22	dev-adult.embryo.PL	0.00012032	0	False	EBZ_1369.1_sets_embryo	0.0	1.0	0.0	0.0	0.0	0.0	0.0	1369.1	antisense;	LSILLVCEMSLWLCVLVQKNPKYVSLRNLLVNSSP	35	8
1308	NPKYVSLR	1369	8	embryo.PL	0.32336	0	False	EBZ_1369.1_sets_embryo	0.0	1.0	0.0	0.0	0.0	0.0	0.0	1369.1	antisense;	LSILLVCEMSLWLCVLVQKNPKYVSLRNLLVNSSP	35	8
1309	LSILLVCEMSLWLCVLVQK	1369	19	dev-adult	0.45039	0	False	EBZ_1369.1_sets_embryo	0.0	1.0	0.0	0.0	0.0	0.0	0.0	1369.1	antisense;	LSILLVCEMSLWLCVLVQKNPKYVSLRNLLVNSSP	35	8
1310	RISQVVFESAIFK	1377	13	embryo	0.13137	0	False	EBZ_1377.1_sets_embryo	1.0	0.0	0.0	0.0	0.0	0.0	0.0	1377.1	intergenic;	FNVYCLGSRRAERSIVFSGSGRRISQVVFESAIFK	35	-1
1311	SIVFSGSGRR	1377	10	embryo	0.013900999999999998	0	False	EBZ_1377.1_sets_embryo	1.0	0.0	0.0	0.0	0.0	0.0	0.0	1377.1	intergenic;	FNVYCLGSRRAERSIVFSGSGRRISQVVFESAIFK	35	-1
1312	ACVMAESGTLVNYSKAKHPQQPH	1381	23	embryo	0.41452	0	False	EBZ_1381.1_sets_embryo.dev-embryo	0.0	0.0	1.0	0.0	1.0	0.0	0.0	1381.1	sense;intronic;	RAYSPHTIAHPRTPLPNIRACVMAESGTLVNYSKAKHPQQPH	42	22
1313	RAYSPHTIAHPR	1381	12	dev-adult.embryo.dev-embryo.PL	0.00063099	0	False	EBZ_1381.1_sets_embryo.dev-embryo	0.0	0.0	1.0	0.0	1.0	0.0	0.0	1381.1	sense;intronic;	RAYSPHTIAHPRTPLPNIRACVMAESGTLVNYSKAKHPQQPH	42	22
1314	RAYSPHTIAHPRTPLPNIR	1381	19	embryo.PL	0.17676	0	False	EBZ_1381.1_sets_embryo.dev-embryo	0.0	0.0	1.0	0.0	1.0	0.0	0.0	1381.1	sense;intronic;	RAYSPHTIAHPRTPLPNIRACVMAESGTLVNYSKAKHPQQPH	42	22
1315	AYSPHTIAHPR	1381	11	dev-adult.PL	0.12462	0	False	EBZ_1381.1_sets_embryo.dev-embryo	0.0	0.0	1.0	0.0	1.0	0.0	0.0	1381.1	sense;intronic;	RAYSPHTIAHPRTPLPNIRACVMAESGTLVNYSKAKHPQQPH	42	22
1316	IFGGLYMCSYVVFMVSAGMGLVLR	1385	24	embryo	1.1485e-05	0	False	EBZ_1385.1_sets_embryo	1.0	0.0	0.0	0.0	0.0	0.0	0.0	1385.1	intergenic;	IFGGLYMCSYVVFMVSAGMGLVLRVSPCVYSGLSNLQRCLCVGVFLFPCVRLHGRVCFAFIRPKSCASLAKS	72	6
1317	LHGRVCFAFIR	1385	11	embryo	0.97062	0	False	EBZ_1385.1_sets_embryo	1.0	0.0	0.0	0.0	0.0	0.0	0.0	1385.1	intergenic;	IFGGLYMCSYVVFMVSAGMGLVLRVSPCVYSGLSNLQRCLCVGVFLFPCVRLHGRVCFAFIRPKSCASLAKS	72	6
1318	VCFAFIR	1385	7	embryo	2.4581	0	False	EBZ_1385.1_sets_embryo	1.0	0.0	0.0	0.0	0.0	0.0	0.0	1385.1	intergenic;	IFGGLYMCSYVVFMVSAGMGLVLRVSPCVYSGLSNLQRCLCVGVFLFPCVRLHGRVCFAFIRPKSCASLAKS	72	6
1319	VCFAFIRPK	1385	9	embryo	1.0067	0	False	EBZ_1385.1_sets_embryo	1.0	0.0	0.0	0.0	0.0	0.0	0.0	1385.1	intergenic;	IFGGLYMCSYVVFMVSAGMGLVLRVSPCVYSGLSNLQRCLCVGVFLFPCVRLHGRVCFAFIRPKSCASLAKS	72	6
1320	AVFICTPRRQFHR	1387	13	embryo.dev-embryo.dev-adult	0.018376	0	False	EBZ_1387.1_sets_embryo	1.0	0.0	0.0	0.0	0.0	0.0	0.0	1387.1	intergenic;	AVFICTPRRQFHRFIISLPASIVRLKKENRIY	32	-1
1321	FIISLPASIVR	1387	11	embryo	0.13871	0	False	EBZ_1387.1_sets_embryo	1.0	0.0	0.0	0.0	0.0	0.0	0.0	1387.1	intergenic;	AVFICTPRRQFHRFIISLPASIVRLKKENRIY	32	-1
1322	FIISLPASIVRLK	1387	13	dev-embryo	0.21737	0	False	EBZ_1387.1_sets_embryo	1.0	0.0	0.0	0.0	0.0	0.0	0.0	1387.1	intergenic;	AVFICTPRRQFHRFIISLPASIVRLKKENRIY	32	-1
1323	EGAGSGQGQGGRR	1401	13	embryo.dev-embryo	0.00051825	0	False	EBZ_1401.1_sets_embryo	0.0	0.0	1.0	1.0	0.0	0.0	0.0	1401.1	sense;exonic;	RSGNEWRRREGAGSGQGQGGRRSPWSRSLLAKAKTSQVLLQLVAPSQRQRSSLPLDHSSGHLCTCATPILVLPGSTFGSAGCQPGPRVTQPTAEGTGARAGTRGVRGV	108	-1
1324	REGAGSGQGQGGR	1401	13	embryo.dev-embryo	0.13810999999999998	0	False	EBZ_1401.1_sets_embryo	0.0	0.0	1.0	1.0	0.0	0.0	0.0	1401.1	sense;exonic;	RSGNEWRRREGAGSGQGQGGRRSPWSRSLLAKAKTSQVLLQLVAPSQRQRSSLPLDHSSGHLCTCATPILVLPGSTFGSAGCQPGPRVTQPTAEGTGARAGTRGVRGV	108	-1
1325	REGAGSGQGQGGRR	1401	14	embryo	0.28497	0	False	EBZ_1401.1_sets_embryo	0.0	0.0	1.0	1.0	0.0	0.0	0.0	1401.1	sense;exonic;	RSGNEWRRREGAGSGQGQGGRRSPWSRSLLAKAKTSQVLLQLVAPSQRQRSSLPLDHSSGHLCTCATPILVLPGSTFGSAGCQPGPRVTQPTAEGTGARAGTRGVRGV	108	-1
1326	SGNEWRR	1401	7	embryo	0.74675	0	False	EBZ_1401.1_sets_embryo	0.0	0.0	1.0	1.0	0.0	0.0	0.0	1401.1	sense;exonic;	RSGNEWRRREGAGSGQGQGGRRSPWSRSLLAKAKTSQVLLQLVAPSQRQRSSLPLDHSSGHLCTCATPILVLPGSTFGSAGCQPGPRVTQPTAEGTGARAGTRGVRGV	108	-1
1327	VQNLINFR	1402	8	embryo.dev-embryo.PL	0.015643999999999998	0	False	EBZ_1402.1_sets_PL.embryo	0.0	0.0	1.0	0.0	1.0	1.0	0.0	1402.1	sense;intronic;fiveUTR;	CKKVQNLINFRNQTNTSSVKK	21	-1
1328	VQNLINFRNQTNTSSVKK	1402	18	dev-adult.embryo.dev-embryo.PL	0.00099079	0	False	EBZ_1402.1_sets_PL.embryo	0.0	0.0	1.0	0.0	1.0	1.0	0.0	1402.1	sense;intronic;fiveUTR;	CKKVQNLINFRNQTNTSSVKK	21	-1
1329	FGKCKGGGFPTVGGSGR	1405	17	embryo	0.080791	0	False	EBZ_1405.1_sets_embryo	0.0	0.0	1.0	1.0	1.0	0.0	0.0	1405.1	sense;exonic;intronic;	CRVQGVADITRHIGGDQELRKRVFAKFGKCKGGGFPTVGGSGRSFSGV	48	-1
1330	HIGGDQELR	1405	9	dev-adult.embryo.dev-embryo.PL	0.00050425	0	False	EBZ_1405.1_sets_embryo	0.0	0.0	1.0	1.0	1.0	0.0	0.0	1405.1	sense;exonic;intronic;	CRVQGVADITRHIGGDQELRKRVFAKFGKCKGGGFPTVGGSGRSFSGV	48	-1
1331	HIGGDQELRK	1405	10	embryo.PL	0.20574	0	False	EBZ_1405.1_sets_embryo	0.0	0.0	1.0	1.0	1.0	0.0	0.0	1405.1	sense;exonic;intronic;	CRVQGVADITRHIGGDQELRKRVFAKFGKCKGGGFPTVGGSGRSFSGV	48	-1
1332	HIGGDQELRKR	1405	11	embryo	0.34543	0	False	EBZ_1405.1_sets_embryo	0.0	0.0	1.0	1.0	1.0	0.0	0.0	1405.1	sense;exonic;intronic;	CRVQGVADITRHIGGDQELRKRVFAKFGKCKGGGFPTVGGSGRSFSGV	48	-1
1333	VFAKFGKCK	1405	9	PL	0.32333	0	False	EBZ_1405.1_sets_embryo	0.0	0.0	1.0	1.0	1.0	0.0	0.0	1405.1	sense;exonic;intronic;	CRVQGVADITRHIGGDQELRKRVFAKFGKCKGGGFPTVGGSGRSFSGV	48	-1
1334	VQGVADITRHIGGDQELRK	1405	19	PL	0.12375	0	False	EBZ_1405.1_sets_embryo	0.0	0.0	1.0	1.0	1.0	0.0	0.0	1405.1	sense;exonic;intronic;	CRVQGVADITRHIGGDQELRKRVFAKFGKCKGGGFPTVGGSGRSFSGV	48	-1
1335	CRVQGVADITRHIGGDQELR	1405	20	dev-adult	0.38918	0	False	EBZ_1405.1_sets_embryo	0.0	0.0	1.0	1.0	1.0	0.0	0.0	1405.1	sense;exonic;intronic;	CRVQGVADITRHIGGDQELRKRVFAKFGKCKGGGFPTVGGSGRSFSGV	48	-1
1336	AMPVQRQQQLRR	1407	12	dev-embryo	0.013929	0	False	EBZ_1407.1_sets_embryo.dev-embryo	0.0	0.0	1.0	1.0	0.0	0.0	1.0	1407.1	sense;exonic;threeUTR;	AMPVQRQQQLRRRQLLPLVRPHRRACPPEQRSLNQRHLHQPMQEQRQPLRSIRQ	54	1
1337	FRMVSLAMITAAPAAQLPVASAR	1420	23	embryo.dev-embryo	0.13471	0	False	EBZ_1420.1_sets_embryo	0.0	0.0	1.0	1.0	1.0	0.0	0.0	1420.1	sense;exonic;intronic;	SCSSNTRRISSSNCLPISSSSISSSSNNRFRMVSLAMITAAPAAQLPVASARRSRTCSCSRETVSRSSTIACGCLSILLTARID	84	31
1338	ISSSNCLPISSSSISSSSNNR	1420	21	embryo.dev-adult	0.0006394	0	False	EBZ_1420.1_sets_embryo	0.0	0.0	1.0	1.0	1.0	0.0	0.0	1420.1	sense;exonic;intronic;	SCSSNTRRISSSNCLPISSSSISSSSNNRFRMVSLAMITAAPAAQLPVASARRSRTCSCSRETVSRSSTIACGCLSILLTARID	84	31
1339	TCSCSRETVSR	1420	11	embryo	0.19423	0	False	EBZ_1420.1_sets_embryo	0.0	0.0	1.0	1.0	1.0	0.0	0.0	1420.1	sense;exonic;intronic;	SCSSNTRRISSSNCLPISSSSISSSSNNRFRMVSLAMITAAPAAQLPVASARRSRTCSCSRETVSRSSTIACGCLSILLTARID	84	31
1340	IENVSASCQLLSK	1433	13	embryo	0.0011506	0	False	EBZ_1433.1_sets_embryo	0.0	0.0	1.0	0.0	0.0	1.0	0.0	1433.1	sense;fiveUTR;	IENVSASCQLLSKKIPNALSGKTS	24	-1
1341	IPNALSGK	1433	8	embryo	0.25072	0	False	EBZ_1433.1_sets_embryo	0.0	0.0	1.0	0.0	0.0	1.0	0.0	1433.1	sense;fiveUTR;	IENVSASCQLLSKKIPNALSGKTS	24	-1
1342	LSQISMMWQPEYNR	1445	14	embryo.dev-embryo	0.00045221	0	False	EBZ_1445.1_sets_embryo	6.0	4.0	3.0	0.0	3.0	0.0	0.0	1445.1	intergenic;antisense;sense;intronic;	NSKREGLQFDFIRLSQISMMWQPEYNRKMYLGLCFTVCTAMTCRCQTPAYPGRQ	54	18
1343	LSQISMMWQPEYNRK	1445	15	embryo.dev-embryo	0.20585	0	False	EBZ_1445.1_sets_embryo	6.0	4.0	3.0	0.0	3.0	0.0	0.0	1445.1	intergenic;antisense;sense;intronic;	NSKREGLQFDFIRLSQISMMWQPEYNRKMYLGLCFTVCTAMTCRCQTPAYPGRQ	54	18
1344	NSKREGLQFDFIR	1445	13	embryo	0.38478	0	False	EBZ_1445.1_sets_embryo	6.0	4.0	3.0	0.0	3.0	0.0	0.0	1445.1	intergenic;antisense;sense;intronic;	NSKREGLQFDFIRLSQISMMWQPEYNRKMYLGLCFTVCTAMTCRCQTPAYPGRQ	54	18
1345	ACIQMQIEIR	1446	10	embryo	0.017083	0	False	EBZ_1446.3_sets_embryo.dev-embryo	0.0	1.0	0.0	0.0	0.0	0.0	0.0	1446.3	antisense;	IGFSSFLFDLYWDLQFIFFISTNCLISRTCGKLTCCRACIQMQIEIRYRFRGCCYHLASLVHEYNTKTKIIHTWDNFTTKRDRNTRTQNTSKHKIQGWRLRFSFLFSFTYFLVFALALTFAALSLCRSALTKQTHRYTHTRTEMARSLAISFSLSRPRVSYIHMLLRMRVCVCAGVCMYGFYDDEKCLLLLHRNQVFCSRFSHFFNN	207	41
1349	ACIQMQIEIRYRFR	1446	14	embryo	0.37102	0	False	EBZ_1446.3_sets_embryo.dev-embryo	0.0	1.0	0.0	0.0	0.0	0.0	0.0	1446.3	antisense;	IGFSSFLFDLYWDLQFIFFISTNCLISRTCGKLTCCRACIQMQIEIRYRFRGCCYHLASLVHEYNTKTKIIHTWDNFTTKRDRNTRTQNTSKHKIQGWRLRFSFLFSFTYFLVFALALTFAALSLCRSALTKQTHRYTHTRTEMARSLAISFSLSRPRVSYIHMLLRMRVCVCAGVCMYGFYDDEKCLLLLHRNQVFCSRFSHFFNN	207	41
1353	FSFLFSFTYFLVFALALTFAALSLCRSALTK	1446	31	embryo.dev-embryo	0.20289	0	False	EBZ_1446.3_sets_embryo.dev-embryo	0.0	1.0	0.0	0.0	0.0	0.0	0.0	1446.3	antisense;	IGFSSFLFDLYWDLQFIFFISTNCLISRTCGKLTCCRACIQMQIEIRYRFRGCCYHLASLVHEYNTKTKIIHTWDNFTTKRDRNTRTQNTSKHKIQGWRLRFSFLFSFTYFLVFALALTFAALSLCRSALTKQTHRYTHTRTEMARSLAISFSLSRPRVSYIHMLLRMRVCVCAGVCMYGFYDDEKCLLLLHRNQVFCSRFSHFFNN	207	41
1357	IIHTWDNFTTK	1446	11	embryo.dev-embryo	0.38818	0	False	EBZ_1446.3_sets_embryo.dev-embryo	0.0	1.0	0.0	0.0	0.0	0.0	0.0	1446.3	antisense;	IGFSSFLFDLYWDLQFIFFISTNCLISRTCGKLTCCRACIQMQIEIRYRFRGCCYHLASLVHEYNTKTKIIHTWDNFTTKRDRNTRTQNTSKHKIQGWRLRFSFLFSFTYFLVFALALTFAALSLCRSALTKQTHRYTHTRTEMARSLAISFSLSRPRVSYIHMLLRMRVCVCAGVCMYGFYDDEKCLLLLHRNQVFCSRFSHFFNN	207	41
1361	IIHTWDNFTTKR	1446	12	embryo.dev-embryo.PL	0.00021352	0	False	EBZ_1446.3_sets_embryo.dev-embryo	0.0	1.0	0.0	0.0	0.0	0.0	0.0	1446.3	antisense;	IGFSSFLFDLYWDLQFIFFISTNCLISRTCGKLTCCRACIQMQIEIRYRFRGCCYHLASLVHEYNTKTKIIHTWDNFTTKRDRNTRTQNTSKHKIQGWRLRFSFLFSFTYFLVFALALTFAALSLCRSALTKQTHRYTHTRTEMARSLAISFSLSRPRVSYIHMLLRMRVCVCAGVCMYGFYDDEKCLLLLHRNQVFCSRFSHFFNN	207	41
1365	VCVCAGVCMYGFYDDEK	1446	17	embryo	0.25823	0	False	EBZ_1446.3_sets_embryo.dev-embryo	0.0	1.0	0.0	0.0	0.0	0.0	0.0	1446.3	antisense;	IGFSSFLFDLYWDLQFIFFISTNCLISRTCGKLTCCRACIQMQIEIRYRFRGCCYHLASLVHEYNTKTKIIHTWDNFTTKRDRNTRTQNTSKHKIQGWRLRFSFLFSFTYFLVFALALTFAALSLCRSALTKQTHRYTHTRTEMARSLAISFSLSRPRVSYIHMLLRMRVCVCAGVCMYGFYDDEKCLLLLHRNQVFCSRFSHFFNN	207	41
1369	VSYIHMLLR	1446	9	embryo.PL	0.40392	0	False	EBZ_1446.3_sets_embryo.dev-embryo	0.0	1.0	0.0	0.0	0.0	0.0	0.0	1446.3	antisense;	IGFSSFLFDLYWDLQFIFFISTNCLISRTCGKLTCCRACIQMQIEIRYRFRGCCYHLASLVHEYNTKTKIIHTWDNFTTKRDRNTRTQNTSKHKIQGWRLRFSFLFSFTYFLVFALALTFAALSLCRSALTKQTHRYTHTRTEMARSLAISFSLSRPRVSYIHMLLRMRVCVCAGVCMYGFYDDEKCLLLLHRNQVFCSRFSHFFNN	207	41
1373	YTHTRTEMAR	1446	10	embryo	0.94182	0	False	EBZ_1446.3_sets_embryo.dev-embryo	0.0	1.0	0.0	0.0	0.0	0.0	0.0	1446.3	antisense;	IGFSSFLFDLYWDLQFIFFISTNCLISRTCGKLTCCRACIQMQIEIRYRFRGCCYHLASLVHEYNTKTKIIHTWDNFTTKRDRNTRTQNTSKHKIQGWRLRFSFLFSFTYFLVFALALTFAALSLCRSALTKQTHRYTHTRTEMARSLAISFSLSRPRVSYIHMLLRMRVCVCAGVCMYGFYDDEKCLLLLHRNQVFCSRFSHFFNN	207	41
1377	HKIQGWRLR	1446	9	PL	0.34664	0	False	EBZ_1446.3_sets_embryo.dev-embryo	0.0	1.0	0.0	0.0	0.0	0.0	0.0	1446.3	antisense;	IGFSSFLFDLYWDLQFIFFISTNCLISRTCGKLTCCRACIQMQIEIRYRFRGCCYHLASLVHEYNTKTKIIHTWDNFTTKRDRNTRTQNTSKHKIQGWRLRFSFLFSFTYFLVFALALTFAALSLCRSALTKQTHRYTHTRTEMARSLAISFSLSRPRVSYIHMLLRMRVCVCAGVCMYGFYDDEKCLLLLHRNQVFCSRFSHFFNN	207	41
1381	LTCCRACIQMQIEIR	1446	15	dev-embryo	0.21377	0	False	EBZ_1446.3_sets_embryo.dev-embryo	0.0	1.0	0.0	0.0	0.0	0.0	0.0	1446.3	antisense;	IGFSSFLFDLYWDLQFIFFISTNCLISRTCGKLTCCRACIQMQIEIRYRFRGCCYHLASLVHEYNTKTKIIHTWDNFTTKRDRNTRTQNTSKHKIQGWRLRFSFLFSFTYFLVFALALTFAALSLCRSALTKQTHRYTHTRTEMARSLAISFSLSRPRVSYIHMLLRMRVCVCAGVCMYGFYDDEKCLLLLHRNQVFCSRFSHFFNN	207	41
1386	RNWHWHGNGAGHHGRYK	1458	17	dev-adult.dev-embryo.PL	0.013151	0	False	EBZ_1458.1_sets_PL.embryo	0.0	1.0	1.0	0.0	1.0	0.0	0.0	1458.1	antisense;sense;intronic;	RNWHWHGNGAGHHGRYKSVSNRVWKLAQLISLLSV	35	-1
1387	IQLGRQIQDVQIVGCHHQR	1460	19	embryo.PL	0.13783	0	False	EBZ_1460.1_sets_embryo	0.0	1.0	0.0	0.0	0.0	0.0	0.0	1460.1	antisense;	LRLEFAQGGDDALEGRSHIGKVRNAPSGNQHFAIGMLWRGGHQVENRLCVLVRLLFRWSPTVFAIIGQLGGSTQIADGVRVNDTGATARHHRPDTTITIKDRQLQRSSTLGVQVGDVGLLGICISTKRRWIVNLAPFGTADEISCRIQLGRQIQDVQIVGCHHQRVNLQICEIQVYIGRVQGADKLGNALLGARVLDLLQQLALHVG	207	35
1389	LEFAQGGDDALEGR	1460	14	embryo	0.23886	0	False	EBZ_1460.1_sets_embryo	0.0	1.0	0.0	0.0	0.0	0.0	0.0	1460.1	antisense;	LRLEFAQGGDDALEGRSHIGKVRNAPSGNQHFAIGMLWRGGHQVENRLCVLVRLLFRWSPTVFAIIGQLGGSTQIADGVRVNDTGATARHHRPDTTITIKDRQLQRSSTLGVQVGDVGLLGICISTKRRWIVNLAPFGTADEISCRIQLGRQIQDVQIVGCHHQRVNLQICEIQVYIGRVQGADKLGNALLGARVLDLLQQLALHVG	207	35
1391	LEFAQGGDDALEGRSHIGK	1460	19	embryo	0.17725	0	False	EBZ_1460.1_sets_embryo	0.0	1.0	0.0	0.0	0.0	0.0	0.0	1460.1	antisense;	LRLEFAQGGDDALEGRSHIGKVRNAPSGNQHFAIGMLWRGGHQVENRLCVLVRLLFRWSPTVFAIIGQLGGSTQIADGVRVNDTGATARHHRPDTTITIKDRQLQRSSTLGVQVGDVGLLGICISTKRRWIVNLAPFGTADEISCRIQLGRQIQDVQIVGCHHQRVNLQICEIQVYIGRVQGADKLGNALLGARVLDLLQQLALHVG	207	35
1393	LEFAQGGDDALEGRSHIGKVR	1460	21	embryo	0.022518	0	False	EBZ_1460.1_sets_embryo	0.0	1.0	0.0	0.0	0.0	0.0	0.0	1460.1	antisense;	LRLEFAQGGDDALEGRSHIGKVRNAPSGNQHFAIGMLWRGGHQVENRLCVLVRLLFRWSPTVFAIIGQLGGSTQIADGVRVNDTGATARHHRPDTTITIKDRQLQRSSTLGVQVGDVGLLGICISTKRRWIVNLAPFGTADEISCRIQLGRQIQDVQIVGCHHQRVNLQICEIQVYIGRVQGADKLGNALLGARVLDLLQQLALHVG	207	35
1395	SHIGKVRNAPSGNQHFAIGMLWR	1460	23	embryo	0.40902	0	False	EBZ_1460.1_sets_embryo	0.0	1.0	0.0	0.0	0.0	0.0	0.0	1460.1	antisense;	LRLEFAQGGDDALEGRSHIGKVRNAPSGNQHFAIGMLWRGGHQVENRLCVLVRLLFRWSPTVFAIIGQLGGSTQIADGVRVNDTGATARHHRPDTTITIKDRQLQRSSTLGVQVGDVGLLGICISTKRRWIVNLAPFGTADEISCRIQLGRQIQDVQIVGCHHQRVNLQICEIQVYIGRVQGADKLGNALLGARVLDLLQQLALHVG	207	35
1397	VNDTGATARHHR	1460	12	embryo.dev-embryo.PL	0.00051222	0	False	EBZ_1460.1_sets_embryo	0.0	1.0	0.0	0.0	0.0	0.0	0.0	1460.1	antisense;	LRLEFAQGGDDALEGRSHIGKVRNAPSGNQHFAIGMLWRGGHQVENRLCVLVRLLFRWSPTVFAIIGQLGGSTQIADGVRVNDTGATARHHRPDTTITIKDRQLQRSSTLGVQVGDVGLLGICISTKRRWIVNLAPFGTADEISCRIQLGRQIQDVQIVGCHHQRVNLQICEIQVYIGRVQGADKLGNALLGARVLDLLQQLALHVG	207	35
1399	VRNAPSGNQHFAIGMLWRGGHQVENR	1460	26	embryo	0.15662	0	False	EBZ_1460.1_sets_embryo	0.0	1.0	0.0	0.0	0.0	0.0	0.0	1460.1	antisense;	LRLEFAQGGDDALEGRSHIGKVRNAPSGNQHFAIGMLWRGGHQVENRLCVLVRLLFRWSPTVFAIIGQLGGSTQIADGVRVNDTGATARHHRPDTTITIKDRQLQRSSTLGVQVGDVGLLGICISTKRRWIVNLAPFGTADEISCRIQLGRQIQDVQIVGCHHQRVNLQICEIQVYIGRVQGADKLGNALLGARVLDLLQQLALHVG	207	35
1401	WIVNLAPFGTADEISCR	1460	17	embryo.PL	0.15263	0	False	EBZ_1460.1_sets_embryo	0.0	1.0	0.0	0.0	0.0	0.0	0.0	1460.1	antisense;	LRLEFAQGGDDALEGRSHIGKVRNAPSGNQHFAIGMLWRGGHQVENRLCVLVRLLFRWSPTVFAIIGQLGGSTQIADGVRVNDTGATARHHRPDTTITIKDRQLQRSSTLGVQVGDVGLLGICISTKRRWIVNLAPFGTADEISCRIQLGRQIQDVQIVGCHHQRVNLQICEIQVYIGRVQGADKLGNALLGARVLDLLQQLALHVG	207	35
1403	GGHQVENRLCVLVRLLFR	1460	18	PL	0.38384	0	False	EBZ_1460.1_sets_embryo	0.0	1.0	0.0	0.0	0.0	0.0	0.0	1460.1	antisense;	LRLEFAQGGDDALEGRSHIGKVRNAPSGNQHFAIGMLWRGGHQVENRLCVLVRLLFRWSPTVFAIIGQLGGSTQIADGVRVNDTGATARHHRPDTTITIKDRQLQRSSTLGVQVGDVGLLGICISTKRRWIVNLAPFGTADEISCRIQLGRQIQDVQIVGCHHQRVNLQICEIQVYIGRVQGADKLGNALLGARVLDLLQQLALHVG	207	35
1405	WSPTVFAIIGQLGGSTQIADGVR	1460	23	PL	0.20925	0	False	EBZ_1460.1_sets_embryo	0.0	1.0	0.0	0.0	0.0	0.0	0.0	1460.1	antisense;	LRLEFAQGGDDALEGRSHIGKVRNAPSGNQHFAIGMLWRGGHQVENRLCVLVRLLFRWSPTVFAIIGQLGGSTQIADGVRVNDTGATARHHRPDTTITIKDRQLQRSSTLGVQVGDVGLLGICISTKRRWIVNLAPFGTADEISCRIQLGRQIQDVQIVGCHHQRVNLQICEIQVYIGRVQGADKLGNALLGARVLDLLQQLALHVG	207	35
1407	GGHQVENRLCVLVR	1460	14	dev-embryo	0.21522	0	False	EBZ_1460.1_sets_embryo	0.0	1.0	0.0	0.0	0.0	0.0	0.0	1460.1	antisense;	LRLEFAQGGDDALEGRSHIGKVRNAPSGNQHFAIGMLWRGGHQVENRLCVLVRLLFRWSPTVFAIIGQLGGSTQIADGVRVNDTGATARHHRPDTTITIKDRQLQRSSTLGVQVGDVGLLGICISTKRRWIVNLAPFGTADEISCRIQLGRQIQDVQIVGCHHQRVNLQICEIQVYIGRVQGADKLGNALLGARVLDLLQQLALHVG	207	35
1409	LGNALLGAR	1460	9	dev-embryo	0.14831	0	False	EBZ_1460.1_sets_embryo	0.0	1.0	0.0	0.0	0.0	0.0	0.0	1460.1	antisense;	LRLEFAQGGDDALEGRSHIGKVRNAPSGNQHFAIGMLWRGGHQVENRLCVLVRLLFRWSPTVFAIIGQLGGSTQIADGVRVNDTGATARHHRPDTTITIKDRQLQRSSTLGVQVGDVGLLGICISTKRRWIVNLAPFGTADEISCRIQLGRQIQDVQIVGCHHQRVNLQICEIQVYIGRVQGADKLGNALLGARVLDLLQQLALHVG	207	35
1411	ILAILNSVLLK	1466	11	dev-adult.embryo.dev-embryo.PL	7.7475e-08	0	False	EBZ_1466.1_sets_PL.embryo.dev-embryo	0.0	1.0	0.0	0.0	0.0	0.0	0.0	1466.1	antisense;	ILAILNSVLLKYLDISWYLRDI	22	-1
1412	YLDISWYLR	1466	9	embryo.PL	0.39392	0	False	EBZ_1466.1_sets_PL.embryo.dev-embryo	0.0	1.0	0.0	0.0	0.0	0.0	0.0	1466.1	antisense;	ILAILNSVLLKYLDISWYLRDI	22	-1
1413	LIFAVDGGQIK	1468	11	dev-adult.embryo.dev-embryo.PL	0.00015738	0	False	EBZ_1468.1_sets_embryo.dev-adult.dev-embryo	0.0	0.0	1.0	0.0	0.0	0.0	0.0	1468.1	sense;	LIFAVDGGQIKILVDVAVLGE	21	-1
1414	SLGILGCPLHNR	1475	12	embryo	0.00044171	0	False	EBZ_1475.1_sets_embryo	0.0	0.0	1.0	0.0	0.0	0.0	1.0	1475.1	sense;threeUTR;	LLVLLVKAFAKSLGILGCPLHNRIFVDKN	29	-1
1416	NPILREMNLDLAEK	1480	14	dev-adult.PL	0.20133	0	False	EBZ_1480.1_sets_PL	2.0	1.0	1.0	0.0	1.0	0.0	0.0	1480.1	intergenic;antisense;sense;intronic;	QQKNPILREMNLDLAEKKAPYPQKAPFWQREYTNNKRFKNFVKSIPI	47	9
1418	QQKNPILREMNLDLAEK	1480	17	dev-adult.PL	0.010265	0	False	EBZ_1480.1_sets_PL	2.0	1.0	1.0	0.0	1.0	0.0	0.0	1480.1	intergenic;antisense;sense;intronic;	QQKNPILREMNLDLAEKKAPYPQKAPFWQREYTNNKRFKNFVKSIPI	47	9
1419	NMFLICNLIK	1484	10	PL	0.0017944000000000005	0	False	EBZ_1484.1_sets_PL	1.0	0.0	0.0	0.0	0.0	0.0	0.0	1484.1	intergenic;	NMFLICNLIKIIKFYVFSEN	20	1
1420	SIFDALHNNCFQTIKMKT	1487	18	dev-adult	0.014099	0	False	EBZ_1487.1_sets_PL	0.0	1.0	0.0	0.0	0.0	0.0	0.0	1487.1	antisense;	GKPGNARSIFDALHNNCFQTIKMKT	25	22
1421	SLSFVSASNLLWRINSLIADR	1489	21	embryo.PL	0.12883	0	False	EBZ_1489.1_sets_PL	0.0	0.0	1.0	0.0	1.0	0.0	0.0	1489.1	sense;intronic;	RTRSLSFVSASNLLWRINSLIADRNHFKWKAITASGSHLLSWLSPDGSLHI	51	-1
1422	AITASGSHLLSWLSPDGSLHI	1489	21	dev-adult.PL	0.004206199999999999	0	False	EBZ_1489.1_sets_PL	0.0	0.0	1.0	0.0	1.0	0.0	0.0	1489.1	sense;intronic;	RTRSLSFVSASNLLWRINSLIADRNHFKWKAITASGSHLLSWLSPDGSLHI	51	-1
1423	TRSLSFVSASNLLWR	1489	15	PL	1.005	0	False	EBZ_1489.1_sets_PL	0.0	0.0	1.0	0.0	1.0	0.0	0.0	1489.1	sense;intronic;	RTRSLSFVSASNLLWRINSLIADRNHFKWKAITASGSHLLSWLSPDGSLHI	51	-1
1424	WKAITASGSHLLSWLSPDGSLHI	1489	23	dev-adult	0.22675	0	False	EBZ_1489.1_sets_PL	0.0	0.0	1.0	0.0	1.0	0.0	0.0	1489.1	sense;intronic;	RTRSLSFVSASNLLWRINSLIADRNHFKWKAITASGSHLLSWLSPDGSLHI	51	-1
1425	LVRPPSQWQSIYLETKEAYLDMI	1490	23	embryo.PL	0.14695999999999998	0	False	EBZ_1490.1_sets_PL	0.0	1.0	0.0	0.0	0.0	0.0	0.0	1490.1	antisense;	SCAGRPARWHPTRRLVRPPSQWQSIYLETKEAYLDMI	37	35
1426	PPSQWQSIYLETK	1490	13	PL	0.0020248	0	False	EBZ_1490.1_sets_PL	0.0	1.0	0.0	0.0	0.0	0.0	0.0	1490.1	antisense;	SCAGRPARWHPTRRLVRPPSQWQSIYLETKEAYLDMI	37	35
1427	QTLNKQVTMQQNDPDSNQQEVIQQSLKR	1493	28	PL	0.40671	0	False	EBZ_1493.1_sets_PL	0.0	0.0	1.0	0.0	1.0	0.0	0.0	1493.1	sense;intronic;	QYIHTILLHFCLSRITIKYLSTCRKQTLNKQVTMQQNDPDSNQQEVIQQSLKRPSR	56	33
1428	QVTMQQNDPDSNQQEVIQQSLK	1493	22	dev-adult.PL	0.0055777	0	False	EBZ_1493.1_sets_PL	0.0	0.0	1.0	0.0	1.0	0.0	0.0	1493.1	sense;intronic;	QYIHTILLHFCLSRITIKYLSTCRKQTLNKQVTMQQNDPDSNQQEVIQQSLKRPSR	56	33
1429	QYIHTILLHFCLSR	1493	14	PL	0.14970999999999998	0	False	EBZ_1493.1_sets_PL	0.0	0.0	1.0	0.0	1.0	0.0	0.0	1493.1	sense;intronic;	QYIHTILLHFCLSRITIKYLSTCRKQTLNKQVTMQQNDPDSNQQEVIQQSLKRPSR	56	33
1430	ITIKYLSTCR	1493	10	dev-adult	1.0451	0	False	EBZ_1493.1_sets_PL	0.0	0.0	1.0	0.0	1.0	0.0	0.0	1493.1	sense;intronic;	QYIHTILLHFCLSRITIKYLSTCRKQTLNKQVTMQQNDPDSNQQEVIQQSLKRPSR	56	33
1431	ITIKYLSTCRK	1493	11	dev-adult	0.39874	0	False	EBZ_1493.1_sets_PL	0.0	0.0	1.0	0.0	1.0	0.0	0.0	1493.1	sense;intronic;	QYIHTILLHFCLSRITIKYLSTCRKQTLNKQVTMQQNDPDSNQQEVIQQSLKRPSR	56	33
1432	QVTMQQNDPDSNQQEVIQQSLKR	1493	23	dev-adult	0.18685	0	False	EBZ_1493.1_sets_PL	0.0	0.0	1.0	0.0	1.0	0.0	0.0	1493.1	sense;intronic;	QYIHTILLHFCLSRITIKYLSTCRKQTLNKQVTMQQNDPDSNQQEVIQQSLKRPSR	56	33
1433	DLFEIRPLTVLGGRSIEFIFTCLMR	1496	25	dev-adult.dev-embryo.PL	0.1179	0	False	EBZ_1496.1_sets_PL	1.0	0.0	0.0	0.0	0.0	0.0	0.0	1496.1	intergenic;	VGNTCTSNIVTHINVIFTRIKDLFEIRPLTVLGGRSIEFIFTCLMRSRWVAAY	53	44
1434	PLTVLGGR	1496	8	dev-adult.dev-embryo.PL	0.001161	0	False	EBZ_1496.1_sets_PL	1.0	0.0	0.0	0.0	0.0	0.0	0.0	1496.1	intergenic;	VGNTCTSNIVTHINVIFTRIKDLFEIRPLTVLGGRSIEFIFTCLMRSRWVAAY	53	44
1435	PLTVLGGRSIEFIFTCLMRSR	1496	21	dev-adult.PL	0.3959	0	False	EBZ_1496.1_sets_PL	1.0	0.0	0.0	0.0	0.0	0.0	0.0	1496.1	intergenic;	VGNTCTSNIVTHINVIFTRIKDLFEIRPLTVLGGRSIEFIFTCLMRSRWVAAY	53	44
1436	SIEFIFTCLMRSRWVAAY	1496	18	PL	0.31371	0	False	EBZ_1496.1_sets_PL	1.0	0.0	0.0	0.0	0.0	0.0	0.0	1496.1	intergenic;	VGNTCTSNIVTHINVIFTRIKDLFEIRPLTVLGGRSIEFIFTCLMRSRWVAAY	53	44
1437	VGNTCTSNIVTHINVIFTR	1496	19	PL	0.16489	0	False	EBZ_1496.1_sets_PL	1.0	0.0	0.0	0.0	0.0	0.0	0.0	1496.1	intergenic;	VGNTCTSNIVTHINVIFTRIKDLFEIRPLTVLGGRSIEFIFTCLMRSRWVAAY	53	44
1438	SIEFIFTCLMR	1496	11	dev-adult	0.39927	0	False	EBZ_1496.1_sets_PL	1.0	0.0	0.0	0.0	0.0	0.0	0.0	1496.1	intergenic;	VGNTCTSNIVTHINVIFTRIKDLFEIRPLTVLGGRSIEFIFTCLMRSRWVAAY	53	44
1439	KNFEIAFQMNRR	1497	12	dev-adult.dev-embryo.PL	0.014168	0	False	EBZ_1497.1_sets_PL	0.0	1.0	0.0	0.0	0.0	0.0	0.0	1497.1	antisense;	KNFEIAFQMNRRVTRWTRGGGGQCTEGLFHSGRFALVLATASSE	44	8
1440	WTRGGGGQCTEGLFHSGR	1497	18	PL	0.21107	0	False	EBZ_1497.1_sets_PL	0.0	1.0	0.0	0.0	0.0	0.0	0.0	1497.1	antisense;	KNFEIAFQMNRRVTRWTRGGGGQCTEGLFHSGRFALVLATASSE	44	8
1441	KNFEIAFQMNR	1497	11	dev-embryo	0.097431	0	False	EBZ_1497.1_sets_PL	0.0	1.0	0.0	0.0	0.0	0.0	0.0	1497.1	antisense;	KNFEIAFQMNRRVTRWTRGGGGQCTEGLFHSGRFALVLATASSE	44	8
1442	LFFILRPYIKNGYR	1499	14	PL	0.35599000000000003	0	False	EBZ_1499.1_sets_PL	1.0	0.0	0.0	0.0	0.0	0.0	0.0	1499.1	intergenic;	LFFILRPYIKNGYRLQVISNNLQSY	25	-1
1443	NGYRLQVISNNLQSY	1499	15	PL	0.21085	0	False	EBZ_1499.1_sets_PL	1.0	0.0	0.0	0.0	0.0	0.0	0.0	1499.1	intergenic;	LFFILRPYIKNGYRLQVISNNLQSY	25	-1
1444	PYIKNGYRLQVISNNLQSY	1499	19	PL	0.006653	0	False	EBZ_1499.1_sets_PL	1.0	0.0	0.0	0.0	0.0	0.0	0.0	1499.1	intergenic;	LFFILRPYIKNGYRLQVISNNLQSY	25	-1
1445	IPTSAVEMNSIRLISGECELNGKQLWTR	1502	28	embryo	0.42785	0	False	EBZ_1502.1_sets_PL	1.0	0.0	0.0	0.0	0.0	0.0	0.0	1502.1	intergenic;	ISFIFIAKPYLIMYPFQPCHGMRILRIPTSAVEMNSIRLISGECELNGKQLWTRSEVNYLARGKNG	66	12
1446	ISFIFIAKPYLIMYPFQPCHGMR	1502	23	embryo	0.19295	0	False	EBZ_1502.1_sets_PL	1.0	0.0	0.0	0.0	0.0	0.0	0.0	1502.1	intergenic;	ISFIFIAKPYLIMYPFQPCHGMRILRIPTSAVEMNSIRLISGECELNGKQLWTRSEVNYLARGKNG	66	12
1447	LISGECELNGK	1502	11	embryo.PL	0.0029939	0	False	EBZ_1502.1_sets_PL	1.0	0.0	0.0	0.0	0.0	0.0	0.0	1502.1	intergenic;	ISFIFIAKPYLIMYPFQPCHGMRILRIPTSAVEMNSIRLISGECELNGKQLWTRSEVNYLARGKNG	66	12
1448	PYLIMYPFQPCHGMR	1502	15	embryo	0.14188	0	False	EBZ_1502.1_sets_PL	1.0	0.0	0.0	0.0	0.0	0.0	0.0	1502.1	intergenic;	ISFIFIAKPYLIMYPFQPCHGMRILRIPTSAVEMNSIRLISGECELNGKQLWTRSEVNYLARGKNG	66	12
1449	PYLIMYPFQPCHGMRILR	1502	18	embryo	0.19633	0	False	EBZ_1502.1_sets_PL	1.0	0.0	0.0	0.0	0.0	0.0	0.0	1502.1	intergenic;	ISFIFIAKPYLIMYPFQPCHGMRILRIPTSAVEMNSIRLISGECELNGKQLWTRSEVNYLARGKNG	66	12
1451	LHLPLLFR	1509	8	dev-adult.embryo.dev-embryo.PL	0.00012464	0	False	EBZ_1509.1_sets_PL	0.0	0.0	1.0	1.0	1.0	0.0	0.0	1509.1	sense;exonic;intronic;	GRGDHNAHVIAGNQATQGGDRYRLHLPLLFRSGFSEWHNVDGSRLLPGEHHGRCLRAAKDSEQKHGAGQLQSVQYERL	78	-1
1453	GRGDHNAHVIAGNQATQGGDR	1509	21	PL	0.214	0	False	EBZ_1509.1_sets_PL	0.0	0.0	1.0	1.0	1.0	0.0	0.0	1509.1	sense;exonic;intronic;	GRGDHNAHVIAGNQATQGGDRYRLHLPLLFRSGFSEWHNVDGSRLLPGEHHGRCLRAAKDSEQKHGAGQLQSVQYERL	78	-1
1454	CIAVVHGVLPARK	1517	13	PL	0.18537	0	False	EBZ_1517.1_sets_PL	0.0	0.0	1.0	0.0	0.0	0.0	0.0	1517.1	sense;	VSDSGVGVHTIRCIAVVHGVLPARKAVSITQKISSIDARLHRHYTDSRRMQRYS	54	49
1455	HYTDSRRMQR	1517	10	PL	0.32109	0	False	EBZ_1517.1_sets_PL	0.0	0.0	1.0	0.0	0.0	0.0	0.0	1517.1	sense;	VSDSGVGVHTIRCIAVVHGVLPARKAVSITQKISSIDARLHRHYTDSRRMQRYS	54	49
1456	ISSIDAR	1517	7	PL	0.026311	0	False	EBZ_1517.1_sets_PL	0.0	0.0	1.0	0.0	0.0	0.0	0.0	1517.1	sense;	VSDSGVGVHTIRCIAVVHGVLPARKAVSITQKISSIDARLHRHYTDSRRMQRYS	54	49
1457	VSDSGVGVHTIR	1517	12	PL	0.00047715	0	False	EBZ_1517.1_sets_PL	0.0	0.0	1.0	0.0	0.0	0.0	0.0	1517.1	sense;	VSDSGVGVHTIRCIAVVHGVLPARKAVSITQKISSIDARLHRHYTDSRRMQRYS	54	49
1458	ISSIDARLHR	1517	10	dev-embryo	0.18816	0	False	EBZ_1517.1_sets_PL	0.0	0.0	1.0	0.0	0.0	0.0	0.0	1517.1	sense;	VSDSGVGVHTIRCIAVVHGVLPARKAVSITQKISSIDARLHRHYTDSRRMQRYS	54	49
1460	QSNSHASMPDGRRSPSWFMR	1518	20	PL	0.010479	0	False	EBZ_1518.1_sets_PL	0.0	0.0	1.0	1.0	1.0	0.0	0.0	1518.1	sense;exonic;intronic;	QSNSHASMPDGRRSPSWFMRRQLFSSIYQRSWGSSRSSWLARRVTWTSWKTRYATHQRMQPTQRRSWRSLMIWRTFCARTLRNGWTRFRKLATS	94	7
1462	RQLFSSIYQR	1518	10	PL	0.16634000000000002	0	False	EBZ_1518.1_sets_PL	0.0	0.0	1.0	1.0	1.0	0.0	0.0	1518.1	sense;exonic;intronic;	QSNSHASMPDGRRSPSWFMRRQLFSSIYQRSWGSSRSSWLARRVTWTSWKTRYATHQRMQPTQRRSWRSLMIWRTFCARTLRNGWTRFRKLATS	94	7
1464	SPSWFMRR	1518	8	PL	0.12045	0	False	EBZ_1518.1_sets_PL	0.0	0.0	1.0	1.0	1.0	0.0	0.0	1518.1	sense;exonic;intronic;	QSNSHASMPDGRRSPSWFMRRQLFSSIYQRSWGSSRSSWLARRVTWTSWKTRYATHQRMQPTQRRSWRSLMIWRTFCARTLRNGWTRFRKLATS	94	7
1465	LHLIIAIK	1521	8	embryo.dev-embryo.PL	0.00015681	0	False	EBZ_1521.1_sets_PL	0.0	0.0	1.0	0.0	1.0	0.0	0.0	1521.1	sense;intronic;	LLLQFKLHLIIAIKLEM	17	16
1466	DAWLPGCQLAWPGGALAVK	1524	19	embryo	0.21405	0	False	EBZ_1524.1_sets_PL.dev-embryo	1.0	0.0	0.0	0.0	0.0	0.0	0.0	1524.1	intergenic;	RRRRLQQIVGEKCARYKFMLATSNRRKLRDAWLPGCQLAWPGGALAVKFLA	51	18
1467	LQQIVGEK	1524	8	dev-adult.embryo.dev-embryo.PL	0.00015951	0	False	EBZ_1524.1_sets_PL.dev-embryo	1.0	0.0	0.0	0.0	0.0	0.0	0.0	1524.1	intergenic;	RRRRLQQIVGEKCARYKFMLATSNRRKLRDAWLPGCQLAWPGGALAVKFLA	51	18
1468	EANRAKHIVIYPEPNIHNTQCTYR	1525	24	PL	0.40444	0	False	EBZ_1525.1_sets_PL	0.0	1.0	0.0	0.0	0.0	0.0	0.0	1525.1	antisense;	EPSLSIYSKGCLACCCLSLLPVAQIVFYHIKQFQLLDKRNSTQREANRAKHIVIYPEPNIHNTQCTYRNETKL	73	-1
1469	GCLACCCLSLLPVAQIVFYHIKQFQLLDK	1525	29	PL	0.1313	0	False	EBZ_1525.1_sets_PL	0.0	1.0	0.0	0.0	0.0	0.0	0.0	1525.1	antisense;	EPSLSIYSKGCLACCCLSLLPVAQIVFYHIKQFQLLDKRNSTQREANRAKHIVIYPEPNIHNTQCTYRNETKL	73	-1
1470	HIVIYPEPNIHNTQCTYRNETKL	1525	23	PL	0.0033305999999999995	0	False	EBZ_1525.1_sets_PL	0.0	1.0	0.0	0.0	0.0	0.0	0.0	1525.1	antisense;	EPSLSIYSKGCLACCCLSLLPVAQIVFYHIKQFQLLDKRNSTQREANRAKHIVIYPEPNIHNTQCTYRNETKL	73	-1
1471	ILICICK	1528	7	embryo.PL	0.24116	0	False	EBZ_1528.1_sets_PL	1.0	0.0	0.0	0.0	0.0	0.0	0.0	1528.1	intergenic;	ILRVIGTNSNRYFVTSPSVFRPIQMSVFCYVTFGFVCTRWLMIFVAVKRILICICK	56	24
1472	PIQMSVFCYVTFGFVCTR	1528	18	embryo	0.25476	0	False	EBZ_1528.1_sets_PL	1.0	0.0	0.0	0.0	0.0	0.0	0.0	1528.1	intergenic;	ILRVIGTNSNRYFVTSPSVFRPIQMSVFCYVTFGFVCTRWLMIFVAVKRILICICK	56	24
1473	VIGTNSNRYFVTSPSVFR	1528	18	dev-adult.embryo.PL	0.00030704	0	False	EBZ_1528.1_sets_PL	1.0	0.0	0.0	0.0	0.0	0.0	0.0	1528.1	intergenic;	ILRVIGTNSNRYFVTSPSVFRPIQMSVFCYVTFGFVCTRWLMIFVAVKRILICICK	56	24
1474	VIGTNSNRYFVTSPSVFRPIQMSVFCYVTFGFVCTR	1528	36	embryo	0.16462000000000002	0	False	EBZ_1528.1_sets_PL	1.0	0.0	0.0	0.0	0.0	0.0	0.0	1528.1	intergenic;	ILRVIGTNSNRYFVTSPSVFRPIQMSVFCYVTFGFVCTRWLMIFVAVKRILICICK	56	24
1475	YFVTSPSVFRPIQMSVFCYVTFGFVCTR	1528	28	embryo	0.21538	0	False	EBZ_1528.1_sets_PL	1.0	0.0	0.0	0.0	0.0	0.0	0.0	1528.1	intergenic;	ILRVIGTNSNRYFVTSPSVFRPIQMSVFCYVTFGFVCTRWLMIFVAVKRILICICK	56	24
1476	ILRVIGTNSNR	1528	11	PL	0.10885	0	False	EBZ_1528.1_sets_PL	1.0	0.0	0.0	0.0	0.0	0.0	0.0	1528.1	intergenic;	ILRVIGTNSNRYFVTSPSVFRPIQMSVFCYVTFGFVCTRWLMIFVAVKRILICICK	56	24
1477	WLMIFVAVKRILICICK	1528	17	PL	0.16213	0	False	EBZ_1528.1_sets_PL	1.0	0.0	0.0	0.0	0.0	0.0	0.0	1528.1	intergenic;	ILRVIGTNSNRYFVTSPSVFRPIQMSVFCYVTFGFVCTRWLMIFVAVKRILICICK	56	24
1478	PIQMSVFCYVTFGFVCTRWLMIFVAVKR	1528	28	dev-adult	0.20986	0	False	EBZ_1528.1_sets_PL	1.0	0.0	0.0	0.0	0.0	0.0	0.0	1528.1	intergenic;	ILRVIGTNSNRYFVTSPSVFRPIQMSVFCYVTFGFVCTRWLMIFVAVKRILICICK	56	24
1479	SMFHNEAAEVK	1529	11	PL	0.010253	0	False	EBZ_1529.1_sets_PL	0.0	0.0	1.0	0.0	1.0	0.0	0.0	1529.1	sense;intronic;	CKCTLVGRSMFHNEAAEVKLLNNNIVLVFSVDLYWLENISFSLQLQRGSLKSFF	54	9
1480	QSLIWLMPVGGSQWR	1531	15	PL	0.0013250999999999998	0	False	EBZ_1531.1_sets_PL	1.0	0.0	0.0	0.0	0.0	0.0	0.0	1531.1	intergenic;	QSLIWLMPVGGSQWR	15	6
1481	FSLISQQIHKSRMLILGSNNAAQNNK	1534	26	dev-adult.PL	0.0054492	0	False	EBZ_1534.1_sets_PL	0.0	1.0	0.0	0.0	0.0	0.0	0.0	1534.1	antisense;	FSLISQQIHKSRMLILGSNNAAQNNKSHFALRKCSFNICMKNHSYAELAY	50	12
1482	LLITGVMKSNWSSFHGTSLSTL	1538	22	dev-adult.PL	0.0015317	0	False	EBZ_1538.1_sets_PL	0.0	1.0	0.0	0.0	0.0	0.0	0.0	1538.1	antisense;	LLITGVMKSNWSSFHGTSLSTL	22	6
1483	SNWSSFHGTSLSTL	1538	14	PL	0.15908	0	False	EBZ_1538.1_sets_PL	0.0	1.0	0.0	0.0	0.0	0.0	0.0	1538.1	antisense;	LLITGVMKSNWSSFHGTSLSTL	22	6
1484	HQLMLLPIR	1540	9	PL	0.0043746	0	False	EBZ_1540.1_sets_PL	0.0	0.0	1.0	0.0	1.0	0.0	0.0	1540.1	sense;intronic;	NKFQFNQSNPNGNRYMRHQLMLLPIRFA	28	15
1485	FQFNQSNPNGNRYMR	1540	15	dev-adult	0.12693	0	False	EBZ_1540.1_sets_PL	0.0	0.0	1.0	0.0	1.0	0.0	0.0	1540.1	sense;intronic;	NKFQFNQSNPNGNRYMRHQLMLLPIRFA	28	15
1486	HFFFFWPSLR	1541	10	dev-embryo.PL	0.12141	0	False	EBZ_1541.1_sets_PL	0.0	1.0	0.0	0.0	0.0	0.0	0.0	1541.1	antisense;	HFFFFWPSLREKFTRPVSARLSSNWMLIPNRNPLMFMYLLASRFAGQGNC	50	25
1487	LSSNWMLIPNRNPLMFMYLLASR	1541	23	dev-embryo.PL	0.008934200000000002	0	False	EBZ_1541.1_sets_PL	0.0	1.0	0.0	0.0	0.0	0.0	0.0	1541.1	antisense;	HFFFFWPSLREKFTRPVSARLSSNWMLIPNRNPLMFMYLLASRFAGQGNC	50	25
1488	HFFFFWPSLREK	1541	12	dev-embryo	0.2656	0	False	EBZ_1541.1_sets_PL	0.0	1.0	0.0	0.0	0.0	0.0	0.0	1541.1	antisense;	HFFFFWPSLREKFTRPVSARLSSNWMLIPNRNPLMFMYLLASRFAGQGNC	50	25
1489	LSSNWMLIPNR	1541	11	dev-embryo	0.4356	0	False	EBZ_1541.1_sets_PL	0.0	1.0	0.0	0.0	0.0	0.0	0.0	1541.1	antisense;	HFFFFWPSLREKFTRPVSARLSSNWMLIPNRNPLMFMYLLASRFAGQGNC	50	25
1490	NPLMFMYLLASR	1541	12	dev-embryo	0.14636	0	False	EBZ_1541.1_sets_PL	0.0	1.0	0.0	0.0	0.0	0.0	0.0	1541.1	antisense;	HFFFFWPSLREKFTRPVSARLSSNWMLIPNRNPLMFMYLLASRFAGQGNC	50	25
1491	SNIIAFCR	1544	8	embryo	0.015572999999999997	0	False	EBZ_1544.1_sets_PL	3.0	0.0	0.0	0.0	0.0	0.0	0.0	1544.1	intergenic;	SNIIAFCRMSFEWYKFDTSDERDEN	25	8
1492	SNIIAFCRMSFEWYK	1544	15	dev-adult.embryo.dev-embryo.PL	0.005964100000000001	0	False	EBZ_1544.1_sets_PL	3.0	0.0	0.0	0.0	0.0	0.0	0.0	1544.1	intergenic;	SNIIAFCRMSFEWYKFDTSDERDEN	25	8
1493	SNIIAFCRMSFEWYKFDTSDER	1544	22	embryo	0.22719	0	False	EBZ_1544.1_sets_PL	3.0	0.0	0.0	0.0	0.0	0.0	0.0	1544.1	intergenic;	SNIIAFCRMSFEWYKFDTSDERDEN	25	8
1494	MSFEWYKFDTSDER	1544	14	PL	1.0177	0	False	EBZ_1544.1_sets_PL	3.0	0.0	0.0	0.0	0.0	0.0	0.0	1544.1	intergenic;	SNIIAFCRMSFEWYKFDTSDERDEN	25	8
1495	ISGEKCAINEISFA	1548	14	PL	0.8840399999999999	0	False	EBZ_1548.1_sets_PL	0.0	1.0	0.0	0.0	0.0	0.0	0.0	1548.1	antisense;	NSNILQCISGYPAWKRAMQTEYPRVRRISGEKCAINEISFA	41	17
1496	NSNILQCISGYPAWK	1548	15	dev-adult.PL	0.0015932	0	False	EBZ_1548.1_sets_PL	0.0	1.0	0.0	0.0	0.0	0.0	0.0	1548.1	antisense;	NSNILQCISGYPAWKRAMQTEYPRVRRISGEKCAINEISFA	41	17
1497	MLLNSDTANRR	1549	11	dev-adult.PL	0.0053092	0	False	EBZ_1549.1_sets_PL.dev-embryo	0.0	0.0	1.0	0.0	0.0	0.0	1.0	1549.1	sense;threeUTR;	TTNKSLGLRLQLFFVRLCNPHKMLLNSDTANRRCRYATVTRFAVSISASG	50	22
1498	ISYIKAYAISLYIFDFLYM	1551	19	embryo	0.13982999999999998	0	False	EBZ_1551.1_sets_PL	0.0	0.0	1.0	0.0	1.0	0.0	0.0	1551.1	sense;intronic;	SLLLLLSTELFNDTCHFKISYIKAYAISLYIFDFLYM	37	36
1499	SLLLLLSTELFNDTCHFK	1551	18	dev-adult.dev-embryo.PL	0.0005272	0	False	EBZ_1551.1_sets_PL	0.0	0.0	1.0	0.0	1.0	0.0	0.0	1551.1	sense;intronic;	SLLLLLSTELFNDTCHFKISYIKAYAISLYIFDFLYM	37	36
1500	SLLLLLSTELFNDTCHFKISYIK	1551	23	PL	0.14157999999999998	0	False	EBZ_1551.1_sets_PL	0.0	0.0	1.0	0.0	1.0	0.0	0.0	1551.1	sense;intronic;	SLLLLLSTELFNDTCHFKISYIKAYAISLYIFDFLYM	37	36
1501	AGISGGELELELALGLPLVEDFEMRGCR	1557	28	PL	0.13554000000000002	0	False	EBZ_1557.1_sets_PL	0.0	1.0	0.0	0.0	0.0	0.0	0.0	1557.2	antisense;	PILRHISMRMVSHCRKAGISGGELELELALGLPLVEDFEMRGCRRITTRRHNMQVGFIAADLLFFRSEEYEFDTFLRLVFRFPFL	85	7
1502	HISMRMVSHCRK	1557	12	dev-embryo.PL	0.10833	0	False	EBZ_1557.1_sets_PL	0.0	1.0	0.0	0.0	0.0	0.0	0.0	1557.2	antisense;	PILRHISMRMVSHCRKAGISGGELELELALGLPLVEDFEMRGCRRITTRRHNMQVGFIAADLLFFRSEEYEFDTFLRLVFRFPFL	85	7
1503	HNMQVGFIAADLLFFRSEEYEFDTFLRLVFR	1557	31	PL	0.40165	0	False	EBZ_1557.1_sets_PL	0.0	1.0	0.0	0.0	0.0	0.0	0.0	1557.2	antisense;	PILRHISMRMVSHCRKAGISGGELELELALGLPLVEDFEMRGCRRITTRRHNMQVGFIAADLLFFRSEEYEFDTFLRLVFRFPFL	85	7
1504	RHNMQVGFIAADLLFFR	1557	17	PL	0.0021706	0	False	EBZ_1557.1_sets_PL	0.0	1.0	0.0	0.0	0.0	0.0	0.0	1557.2	antisense;	PILRHISMRMVSHCRKAGISGGELELELALGLPLVEDFEMRGCRRITTRRHNMQVGFIAADLLFFRSEEYEFDTFLRLVFRFPFL	85	7
1505	AGISGGELELELALGLPLVEDFEMRGCRR	1557	29	dev-embryo	0.16323	0	False	EBZ_1557.1_sets_PL	0.0	1.0	0.0	0.0	0.0	0.0	0.0	1557.2	antisense;	PILRHISMRMVSHCRKAGISGGELELELALGLPLVEDFEMRGCRRITTRRHNMQVGFIAADLLFFRSEEYEFDTFLRLVFRFPFL	85	7
1506	KLLQAIK	1560	7	embryo.PL	0.040321	0	False	EBZ_1560.1_sets_PL	0.0	1.0	0.0	0.0	0.0	0.0	0.0	1560.1	antisense;	WFDEFITFDVQTRKLLQAIKQGLQTTNISHFPHRFTSSDFGRVKQMLLKVYMSQLSVKRLVGIKYL	66	45
1507	QGLQTTNISHFPHRFTSSDFGR	1560	22	embryo	0.1699	0	False	EBZ_1560.1_sets_PL	0.0	1.0	0.0	0.0	0.0	0.0	0.0	1560.1	antisense;	WFDEFITFDVQTRKLLQAIKQGLQTTNISHFPHRFTSSDFGRVKQMLLKVYMSQLSVKRLVGIKYL	66	45
1508	QMLLKVYMSQLSVK	1560	14	embryo.PL	0.011002	0	False	EBZ_1560.1_sets_PL	0.0	1.0	0.0	0.0	0.0	0.0	0.0	1560.1	antisense;	WFDEFITFDVQTRKLLQAIKQGLQTTNISHFPHRFTSSDFGRVKQMLLKVYMSQLSVKRLVGIKYL	66	45
1509	VKQMLLKVYMSQLSVK	1560	16	embryo.PL	0.37454	0	False	EBZ_1560.1_sets_PL	0.0	1.0	0.0	0.0	0.0	0.0	0.0	1560.1	antisense;	WFDEFITFDVQTRKLLQAIKQGLQTTNISHFPHRFTSSDFGRVKQMLLKVYMSQLSVKRLVGIKYL	66	45
1510	LVLSHIVYLIK	1561	11	embryo.dev-embryo.PL	0.14481	0	False	EBZ_1561.1_sets_PL.dev-embryo	1.0	0.0	0.0	0.0	0.0	0.0	0.0	1561.1	intergenic;	RKRVGPKVELLCATNMTWHKRKNIIIIIEKGAVFRKPSMVRLVLSHIVYLIKIKQIMLTNKISLLPFVRSLFVAR	75	15
1511	NIIIIIEK	1561	8	embryo.dev-embryo	0.48034	0	False	EBZ_1561.1_sets_PL.dev-embryo	1.0	0.0	0.0	0.0	0.0	0.0	0.0	1561.1	intergenic;	RKRVGPKVELLCATNMTWHKRKNIIIIIEKGAVFRKPSMVRLVLSHIVYLIKIKQIMLTNKISLLPFVRSLFVAR	75	15
1512	VELLCATNMTWHK	1561	13	embryo.dev-embryo.PL	0.00078395	0	False	EBZ_1561.1_sets_PL.dev-embryo	1.0	0.0	0.0	0.0	0.0	0.0	0.0	1561.1	intergenic;	RKRVGPKVELLCATNMTWHKRKNIIIIIEKGAVFRKPSMVRLVLSHIVYLIKIKQIMLTNKISLLPFVRSLFVAR	75	15
1513	VELLCATNMTWHKR	1561	14	embryo.dev-adult	0.12967	0	False	EBZ_1561.1_sets_PL.dev-embryo	1.0	0.0	0.0	0.0	0.0	0.0	0.0	1561.1	intergenic;	RKRVGPKVELLCATNMTWHKRKNIIIIIEKGAVFRKPSMVRLVLSHIVYLIKIKQIMLTNKISLLPFVRSLFVAR	75	15
1514	VGPKVELLCATNMTWHK	1561	17	embryo	0.20436	0	False	EBZ_1561.1_sets_PL.dev-embryo	1.0	0.0	0.0	0.0	0.0	0.0	0.0	1561.1	intergenic;	RKRVGPKVELLCATNMTWHKRKNIIIIIEKGAVFRKPSMVRLVLSHIVYLIKIKQIMLTNKISLLPFVRSLFVAR	75	15
1515	VGPKVELLCATNMTWHKR	1561	18	embryo.dev-adult	0.12485999999999997	0	False	EBZ_1561.1_sets_PL.dev-embryo	1.0	0.0	0.0	0.0	0.0	0.0	0.0	1561.1	intergenic;	RKRVGPKVELLCATNMTWHKRKNIIIIIEKGAVFRKPSMVRLVLSHIVYLIKIKQIMLTNKISLLPFVRSLFVAR	75	15
1516	ISLLPFVR	1561	8	dev-adult.PL	0.15074	0	False	EBZ_1561.1_sets_PL.dev-embryo	1.0	0.0	0.0	0.0	0.0	0.0	0.0	1561.1	intergenic;	RKRVGPKVELLCATNMTWHKRKNIIIIIEKGAVFRKPSMVRLVLSHIVYLIKIKQIMLTNKISLLPFVRSLFVAR	75	15
1517	VELLCATNMTWHKRK	1561	15	PL	0.3584	0	False	EBZ_1561.1_sets_PL.dev-embryo	1.0	0.0	0.0	0.0	0.0	0.0	0.0	1561.1	intergenic;	RKRVGPKVELLCATNMTWHKRKNIIIIIEKGAVFRKPSMVRLVLSHIVYLIKIKQIMLTNKISLLPFVRSLFVAR	75	15
1518	KNVSFSNHIK	1563	10	dev-adult.PL	0.0058008	0	False	EBZ_1563.1_sets_PL	0.0	1.0	0.0	0.0	0.0	0.0	0.0	1563.1	antisense;	KNVSFSNHIKKTRHIFWTFHFEGVKHR	27	-1
1519	HIFWTFHFEGVK	1563	12	dev-adult	0.3856	0	False	EBZ_1563.1_sets_PL	0.0	1.0	0.0	0.0	0.0	0.0	0.0	1563.1	antisense;	KNVSFSNHIKKTRHIFWTFHFEGVKHR	27	-1
1520	LQIEIEFLGHLAGLSCFLALAFPR	1567	24	dev-adult.PL	0.0006116	0	False	EBZ_1567.1_sets_PL.dev-adult	0.0	0.0	1.0	0.0	1.0	0.0	0.0	1567.1	sense;intronic;	ISFVKLQIEIEFLGHLAGLSCFLALAFPRNMEISPSFCVLLCFFPASPLHLSHTP	55	30
1521	ILNVLDFGARMWSHGMGEN	1568	19	dev-adult.embryo.dev-embryo.PL	0.00068485	0	False	EBZ_1568.1_sets_PL	0.0	1.0	0.0	0.0	0.0	0.0	0.0	1568.1	antisense;	RRILNVLDFGARMWSHGMGEN	21	12
1522	MWSHGMGEN	1568	9	PL	0.50854	0	False	EBZ_1568.1_sets_PL	0.0	1.0	0.0	0.0	0.0	0.0	0.0	1568.1	antisense;	RRILNVLDFGARMWSHGMGEN	21	12
1523	ILNVLDFGAR	1568	10	dev-embryo	0.26381	0	False	EBZ_1568.1_sets_PL	0.0	1.0	0.0	0.0	0.0	0.0	0.0	1568.1	antisense;	RRILNVLDFGARMWSHGMGEN	21	12
1524	GYANECELPLKCIMINFYSMHMR	1574	23	PL	0.0017602	0	False	EBZ_1574.1_sets_PL	0.0	0.0	1.0	0.0	1.0	0.0	0.0	1574.1	sense;intronic;	KGYANECELPLKCIMINFYSMHMRTDEIQRMVTN	34	14
1525	FMLTALLMSKYK	1575	12	PL	0.011563	0	False	EBZ_1575.1_sets_PL	0.0	1.0	0.0	0.0	0.0	0.0	0.0	1575.1	antisense;	FMLTALLMSKYKDRGHW	17	1
1526	ILEILLNDCVFGVHFIMYSL	1585	20	PL	0.00047894	0	False	EBZ_1585.1_sets_PL	1.0	0.0	0.0	0.0	0.0	0.0	0.0	1585.1	intergenic;	KILEILLNDCVFGVHFIMYSL	21	17
1527	ATSSSAACLSTKFRTR	1594	16	PL	3.326	0	False	EBZ_1594.1_sets_PL	26.0	0.0	23.0	13.0	0.0	0.0	0.0	1594.1	intergenic;sense;exonic;	VAAGSVGSSGSRATSSSAACLSTKFRTRSTGRA	33	-1
1528	VAAGSVGSSGSRATSSSAACLSTK	1594	24	PL	0.16416	0	False	EBZ_1594.1_sets_PL	26.0	0.0	23.0	13.0	0.0	0.0	0.0	1594.1	intergenic;sense;exonic;	VAAGSVGSSGSRATSSSAACLSTKFRTRSTGRA	33	-1
1529	VAAGSVGSSGSRATSSSAACLSTKFR	1594	26	dev-adult.PL	0.0039988	0	False	EBZ_1594.1_sets_PL	26.0	0.0	23.0	13.0	0.0	0.0	0.0	1594.1	intergenic;sense;exonic;	VAAGSVGSSGSRATSSSAACLSTKFRTRSTGRA	33	-1
1530	FMKCIMIGLLLSLSLTWQCENAAK	1595	24	embryo.PL	0.0024404	0	False	EBZ_1595.1_sets_PL	0.0	1.0	0.0	0.0	0.0	0.0	0.0	1595.1	antisense;	FMKCIMIGLLLSLSLTWQCENAAKG	25	1
1531	CIMIGLLLSLSLTWQCENAAK	1595	21	PL	0.11941	0	False	EBZ_1595.1_sets_PL	0.0	1.0	0.0	0.0	0.0	0.0	0.0	1595.1	antisense;	FMKCIMIGLLLSLSLTWQCENAAKG	25	1
1533	LACQRLVIGGWGLK	1596	14	dev-adult.PL	0.0027225	0	False	EBZ_1596.1_sets_PL	0.0	1.0	0.0	0.0	0.0	0.0	0.0	1596.1	antisense;	LACQRLVIGGWGLKKKRRECKNLWGSHIKWLTEVPARTATFRWHFRL	47	-1
1534	QSAAIKMPSLTKQEM	1599	15	PL	0.01496	0	False	EBZ_1599.1_sets_PL	0.0	0.0	1.0	0.0	1.0	0.0	0.0	1599.1	sense;intronic;	QSAAIKMPSLTKQEM	15	6
1535	ALLSAHISMQQQNAVENR	1604	18	embryo.PL	0.0027193	0	False	EBZ_1604.1_sets_PL	1.0	0.0	0.0	0.0	0.0	0.0	0.0	1604.1	intergenic;	KAHTKALLSAHISMQQQNAVENRCNTFSSII	31	13
1536	EIELGQATR	1606	9	dev-adult.PL	0.00025682	0	False	EBZ_1606.1_sets_PL.dev-adult	0.0	1.0	0.0	0.0	0.0	0.0	0.0	1606.1	antisense;	EIELGQATRCPETSGGPHCQRLLGSSQSSLTSGKEAKILWL	41	-1
1537	LANILFMSNWK	1609	11	dev-adult.embryo.PL	0.0064007000000000005	0	False	EBZ_1609.1_sets_PL	1.0	0.0	0.0	0.0	0.0	0.0	0.0	1609.1	intergenic;	LANILFMSNWKNNSNQNCKSNESSYVNIFNMACLF	35	6
1538	NNSNQNCK	1609	8	embryo	0.41836	0	False	EBZ_1609.1_sets_PL	1.0	0.0	0.0	0.0	0.0	0.0	0.0	1609.1	intergenic;	LANILFMSNWKNNSNQNCKSNESSYVNIFNMACLF	35	6
1539	LILFGTIFFCYK	1613	12	PL	0.13192	0	False	EBZ_1613.1_sets_PL	1.0	0.0	0.0	0.0	0.0	0.0	0.0	1613.1	intergenic;	WNIKLILFGTIFFCYKTGLLNYFIHFVTGMHIFKSTRNKSARNNIFISTFSKC	53	29
1540	NNIFISTFSK	1613	10	PL	0.1849	0	False	EBZ_1613.1_sets_PL	1.0	0.0	0.0	0.0	0.0	0.0	0.0	1613.1	intergenic;	WNIKLILFGTIFFCYKTGLLNYFIHFVTGMHIFKSTRNKSARNNIFISTFSKC	53	29
1541	SARNNIFISTFSK	1613	13	PL	0.18787	0	False	EBZ_1613.1_sets_PL	1.0	0.0	0.0	0.0	0.0	0.0	0.0	1613.1	intergenic;	WNIKLILFGTIFFCYKTGLLNYFIHFVTGMHIFKSTRNKSARNNIFISTFSKC	53	29
1542	TGLLNYFIHFVTGMHIFKSTRNK	1613	23	PL	0.020728	0	False	EBZ_1613.1_sets_PL	1.0	0.0	0.0	0.0	0.0	0.0	0.0	1613.1	intergenic;	WNIKLILFGTIFFCYKTGLLNYFIHFVTGMHIFKSTRNKSARNNIFISTFSKC	53	29
1543	LILFGTIFFCYKTGLLNYFIHFVTGMHIFKSTR	1613	33	dev-adult	0.15736	0	False	EBZ_1613.1_sets_PL	1.0	0.0	0.0	0.0	0.0	0.0	0.0	1613.1	intergenic;	WNIKLILFGTIFFCYKTGLLNYFIHFVTGMHIFKSTRNKSARNNIFISTFSKC	53	29
1544	LILFGTIFFCYKTGLLNYFIHFVTGMHIFK	1613	30	dev-embryo	0.13284	0	False	EBZ_1613.1_sets_PL	1.0	0.0	0.0	0.0	0.0	0.0	0.0	1613.1	intergenic;	WNIKLILFGTIFFCYKTGLLNYFIHFVTGMHIFKSTRNKSARNNIFISTFSKC	53	29
1545	WNIKLILFGTIFFCYK	1613	16	dev-embryo	0.20445	0	False	EBZ_1613.1_sets_PL	1.0	0.0	0.0	0.0	0.0	0.0	0.0	1613.1	intergenic;	WNIKLILFGTIFFCYKTGLLNYFIHFVTGMHIFKSTRNKSARNNIFISTFSKC	53	29
1546	SIFMSQASNK	1615	10	embryo.dev-embryo.PL	0.0056508	0	False	EBZ_1615.1_sets_PL	1.0	0.0	0.0	0.0	0.0	0.0	0.0	1615.1	intergenic;	SIFMSQASNKQQICVLLPASLSLENVAGK	29	3
1547	SIFMSQASNKQQICVLLPASLSLENVAGK	1615	29	PL	0.22131	0	False	EBZ_1615.1_sets_PL	1.0	0.0	0.0	0.0	0.0	0.0	0.0	1615.1	intergenic;	SIFMSQASNKQQICVLLPASLSLENVAGK	29	3
1548	AMKSLEQKFNGELFFFVK	1621	18	PL	0.13098	0	False	EBZ_1621.1_sets_PL	0.0	0.0	1.0	1.0	1.0	1.0	0.0	1621.1	sense;exonic;intronic;fiveUTR;	SSLISPIEEIEIASGLKKIICFRAMKSLEQKFNGELFFFVKKRTTIGSQENGKDTPYLCFSDTRR	65	24
1549	IICFRAMK	1621	8	PL	0.055267	0	False	EBZ_1621.1_sets_PL	0.0	0.0	1.0	1.0	1.0	1.0	0.0	1621.1	sense;exonic;intronic;fiveUTR;	SSLISPIEEIEIASGLKKIICFRAMKSLEQKFNGELFFFVKKRTTIGSQENGKDTPYLCFSDTRR	65	24
1550	IICFRAMKSLEQK	1621	13	PL	0.3314	0	False	EBZ_1621.1_sets_PL	0.0	0.0	1.0	1.0	1.0	1.0	0.0	1621.1	sense;exonic;intronic;fiveUTR;	SSLISPIEEIEIASGLKKIICFRAMKSLEQKFNGELFFFVKKRTTIGSQENGKDTPYLCFSDTRR	65	24
1551	SSLISPIEEIEIASGLK	1621	17	PL	0.0044572	0	False	EBZ_1621.1_sets_PL	0.0	0.0	1.0	1.0	1.0	1.0	0.0	1621.1	sense;exonic;intronic;fiveUTR;	SSLISPIEEIEIASGLKKIICFRAMKSLEQKFNGELFFFVKKRTTIGSQENGKDTPYLCFSDTRR	65	24
1552	TTIGSQENGK	1621	10	PL	0.14806	0	False	EBZ_1621.1_sets_PL	0.0	0.0	1.0	1.0	1.0	1.0	0.0	1621.1	sense;exonic;intronic;fiveUTR;	SSLISPIEEIEIASGLKKIICFRAMKSLEQKFNGELFFFVKKRTTIGSQENGKDTPYLCFSDTRR	65	24
1553	TTIGSQENGKDTPYLCFSDTRR	1621	22	PL	0.14643	0	False	EBZ_1621.1_sets_PL	0.0	0.0	1.0	1.0	1.0	1.0	0.0	1621.1	sense;exonic;intronic;fiveUTR;	SSLISPIEEIEIASGLKKIICFRAMKSLEQKFNGELFFFVKKRTTIGSQENGKDTPYLCFSDTRR	65	24
1554	IIDQTFHGVNYR	1622	12	embryo.PL	0.031318	0	False	EBZ_1622.1_sets_PL	3.0	0.0	0.0	0.0	0.0	0.0	0.0	1622.1	intergenic;	IIDQTFHGVNYRTYMTPPNPVLRHPC	26	14
1555	IIDQTFHGVNYRTYMTPPNPVLR	1622	23	embryo.dev-embryo.PL	0.00027357	0	False	EBZ_1622.1_sets_PL	3.0	0.0	0.0	0.0	0.0	0.0	0.0	1622.1	intergenic;	IIDQTFHGVNYRTYMTPPNPVLRHPC	26	14
1556	IIDQTFHGVNYRTYMTPPNPVLRHPC	1622	26	embryo	0.42284	0	False	EBZ_1622.1_sets_PL	3.0	0.0	0.0	0.0	0.0	0.0	0.0	1622.1	intergenic;	IIDQTFHGVNYRTYMTPPNPVLRHPC	26	14
1557	TYMTPPNPVLRHPC	1622	14	embryo	0.20403	0	False	EBZ_1622.1_sets_PL	3.0	0.0	0.0	0.0	0.0	0.0	0.0	1622.1	intergenic;	IIDQTFHGVNYRTYMTPPNPVLRHPC	26	14
1559	IFHLFYILMR	1624	10	dev-adult.embryo.dev-embryo.PL	0.0048886	0	False	EBZ_1624.1_sets_PL	18.0	7.0	6.0	0.0	6.0	0.0	0.0	1624.1	intergenic;antisense;sense;intronic;	IFHLFYILMRDGWLHLKQTKSFFLQSFSKWVSSPHLKHLRVLLSLLIFLDSEICLSTNDPGLFNDLLELQTCL	73	8
1560	VVFLVMSMPTVLCQR	1628	15	dev-adult.embryo.PL	0.00072221	0	False	EBZ_1628.1_sets_PL	0.0	0.0	1.0	0.0	1.0	0.0	0.0	1628.1	sense;intronic;	VVFLVMSMPTVLCQRL	16	5
1561	VVFLVMSMPTVLCQRL	1628	16	embryo.dev-embryo	0.18493	0	False	EBZ_1628.1_sets_PL	0.0	0.0	1.0	0.0	1.0	0.0	0.0	1628.1	sense;intronic;	VVFLVMSMPTVLCQRL	16	5
1562	SLQICKNSCSTGMKK	1629	15	dev-adult.embryo.PL	0.0031752	0	False	EBZ_1629.1_sets_PL	2.0	0.0	0.0	0.0	0.0	0.0	0.0	1629.1	intergenic;	SLQICKNSCSTGMKKES	17	12
1563	SLQICKNSCSTGMK	1629	14	dev-adult	0.9873	0	False	EBZ_1629.1_sets_PL	2.0	0.0	0.0	0.0	0.0	0.0	0.0	1629.1	intergenic;	SLQICKNSCSTGMKKES	17	12
1564	IAEIDVPMLMPK	1633	12	dev-adult.dev-embryo.PL	9.0625e-05	0	False	EBZ_1633.1_sets_PL.dev-adult.dev-embryo	0.0	1.0	0.0	0.0	0.0	0.0	0.0	1633.1	antisense;	IAEIDVPMLMPKNQYSWKKPIPQRFVKFCSTLSVHFG	37	7
1565	LEIIILHCTPIVNRCTK	1634	17	PL	0.004174300000000001	0	False	EBZ_1634.1_sets_PL	1.0	0.0	0.0	0.0	0.0	0.0	0.0	1634.1	intergenic;	LEIIILHCTPIVNRCTKPLVTNSEH	25	-1
1566	EGGAKDQGQPSDQVSPR	1653	17	dev-adult.embryo.dev-embryo.PL	0.0032495	0	False	EBZ_1653.1_sets_PL	0.0	0.0	1.0	0.0	0.0	0.0	1.0	1653.1	sense;threeUTR;	EGGAKDQGQPSDQVSPRTLDASLFWV	26	-1
1568	CHDPHGR	1656	7	PL	0.53915	0	False	EBZ_1656.1_sets_PL	0.0	0.0	1.0	1.0	1.0	1.0	0.0	1656.1	sense;exonic;intronic;fiveUTR;	IRSERAKYKSPPRVQSPNLKSHSSNSSEPVSSQSPPIPAKHQLQSIEHEAPDKRAKWQWPKWRGCRRCRGRCHDPHGRSLRRLRHVRHRSNGLQKQPAAETGNAQLGAGQQWKRPREVHVPPRPGAGPQAADARGPPSGHGTLVSSTLGRPGRESRSPGTDQDAGAGSQGHAVLHQGLRPESRGCSQWRRFRRGS	195	-1
1570	HQLQSIEHEAPDKR	1656	14	dev-adult.PL	0.17392	0	False	EBZ_1656.1_sets_PL	0.0	0.0	1.0	1.0	1.0	1.0	0.0	1656.1	sense;exonic;intronic;fiveUTR;	IRSERAKYKSPPRVQSPNLKSHSSNSSEPVSSQSPPIPAKHQLQSIEHEAPDKRAKWQWPKWRGCRRCRGRCHDPHGRSLRRLRHVRHRSNGLQKQPAAETGNAQLGAGQQWKRPREVHVPPRPGAGPQAADARGPPSGHGTLVSSTLGRPGRESRSPGTDQDAGAGSQGHAVLHQGLRPESRGCSQWRRFRRGS	195	-1
1572	HRSNGLQKQPAAETGNAQLGAGQQWK	1656	26	PL	0.32931	0	False	EBZ_1656.1_sets_PL	0.0	0.0	1.0	1.0	1.0	1.0	0.0	1656.1	sense;exonic;intronic;fiveUTR;	IRSERAKYKSPPRVQSPNLKSHSSNSSEPVSSQSPPIPAKHQLQSIEHEAPDKRAKWQWPKWRGCRRCRGRCHDPHGRSLRRLRHVRHRSNGLQKQPAAETGNAQLGAGQQWKRPREVHVPPRPGAGPQAADARGPPSGHGTLVSSTLGRPGRESRSPGTDQDAGAGSQGHAVLHQGLRPESRGCSQWRRFRRGS	195	-1
1574	SNGLQKQPAAETGNAQLGAGQQWK	1656	24	dev-adult.dev-embryo.PL	0.0011285	0	False	EBZ_1656.1_sets_PL	0.0	0.0	1.0	1.0	1.0	1.0	0.0	1656.1	sense;exonic;intronic;fiveUTR;	IRSERAKYKSPPRVQSPNLKSHSSNSSEPVSSQSPPIPAKHQLQSIEHEAPDKRAKWQWPKWRGCRRCRGRCHDPHGRSLRRLRHVRHRSNGLQKQPAAETGNAQLGAGQQWKRPREVHVPPRPGAGPQAADARGPPSGHGTLVSSTLGRPGRESRSPGTDQDAGAGSQGHAVLHQGLRPESRGCSQWRRFRRGS	195	-1
1576	HQLQSIEHEAPDK	1656	13	dev-adult	0.41298	0	False	EBZ_1656.1_sets_PL	0.0	0.0	1.0	1.0	1.0	1.0	0.0	1656.1	sense;exonic;intronic;fiveUTR;	IRSERAKYKSPPRVQSPNLKSHSSNSSEPVSSQSPPIPAKHQLQSIEHEAPDKRAKWQWPKWRGCRRCRGRCHDPHGRSLRRLRHVRHRSNGLQKQPAAETGNAQLGAGQQWKRPREVHVPPRPGAGPQAADARGPPSGHGTLVSSTLGRPGRESRSPGTDQDAGAGSQGHAVLHQGLRPESRGCSQWRRFRRGS	195	-1
1578	SNGLQKQPAAETGNAQLGAGQQWKR	1656	25	dev-embryo	0.4028	0	False	EBZ_1656.1_sets_PL	0.0	0.0	1.0	1.0	1.0	1.0	0.0	1656.1	sense;exonic;intronic;fiveUTR;	IRSERAKYKSPPRVQSPNLKSHSSNSSEPVSSQSPPIPAKHQLQSIEHEAPDKRAKWQWPKWRGCRRCRGRCHDPHGRSLRRLRHVRHRSNGLQKQPAAETGNAQLGAGQQWKRPREVHVPPRPGAGPQAADARGPPSGHGTLVSSTLGRPGRESRSPGTDQDAGAGSQGHAVLHQGLRPESRGCSQWRRFRRGS	195	-1
1579	ILTKYKLLLTNSFFEIYFCF	1657	20	dev-adult.embryo.dev-embryo.PL	0.0020715	0	False	EBZ_1657.1_sets_PL	1.0	0.0	0.0	0.0	0.0	0.0	0.0	1657.1	intergenic;	SYKILTKYKLLLTNSFFEIYFCF	23	-1
1580	LLLTNSFFEIYFCF	1657	14	embryo	0.43565	0	False	EBZ_1657.1_sets_PL	1.0	0.0	0.0	0.0	0.0	0.0	0.0	1657.1	intergenic;	SYKILTKYKLLLTNSFFEIYFCF	23	-1
1581	LAVCSRQSAPSK	1658	12	PL	0.50125	0	False	EBZ_1658.1_sets_PL	0.0	1.0	0.0	0.0	0.0	0.0	0.0	1658.1	antisense;	LISGLTCAGTKLAVCSRQSAPSKTNILRTWKTKSEIGISSTLLRFVCESRRREFFLAFQQGAVKHNCAAFTC	72	-1
1582	LISGLTCAGTKLAVCSR	1658	17	dev-adult.PL	0.00045431	0	False	EBZ_1658.1_sets_PL	0.0	1.0	0.0	0.0	0.0	0.0	0.0	1658.1	antisense;	LISGLTCAGTKLAVCSRQSAPSKTNILRTWKTKSEIGISSTLLRFVCESRRREFFLAFQQGAVKHNCAAFTC	72	-1
1583	SEIGISSTLLRFVCESR	1658	17	PL	0.18398	0	False	EBZ_1658.1_sets_PL	0.0	1.0	0.0	0.0	0.0	0.0	0.0	1658.1	antisense;	LISGLTCAGTKLAVCSRQSAPSKTNILRTWKTKSEIGISSTLLRFVCESRRREFFLAFQQGAVKHNCAAFTC	72	-1
1584	TWKTKSEIGISSTLLR	1658	16	dev-adult	0.14737	0	False	EBZ_1658.1_sets_PL	0.0	1.0	0.0	0.0	0.0	0.0	0.0	1658.1	antisense;	LISGLTCAGTKLAVCSRQSAPSKTNILRTWKTKSEIGISSTLLRFVCESRRREFFLAFQQGAVKHNCAAFTC	72	-1
1585	KSLNATGILK	1660	10	dev-adult.embryo.dev-embryo.PL	0.00018469	0	False	EBZ_1660.1_sets_PL.dev-adult	0.0	0.0	1.0	0.0	1.0	0.0	1.0	1660.1	sense;intronic;threeUTR;	KSLNATGILKVRMTLYCVE	19	12
1586	KSLNATGILK	1660	10	dev-adult.embryo.dev-embryo.PL	0.00018469	0	False	EBZ_1660.1_sets_PL.dev-adult	0.0	0.0	1.0	0.0	1.0	0.0	1.0	1660.1	sense;intronic;threeUTR;	KSLNATGILKGKCIQNELFLCENN	24	-1
1587	KSLNATGILK	1660	10	dev-adult.embryo.dev-embryo.PL	0.00018469	0	False	EBZ_1660.2_sets_PL.dev-adult	0.0	0.0	1.0	0.0	1.0	0.0	1.0	1660.2	sense;intronic;threeUTR;	KSLNATGILKVRMTLYCVE	19	12
1588	KSLNATGILK	1660	10	dev-adult.embryo.dev-embryo.PL	0.00018469	0	False	EBZ_1660.2_sets_PL.dev-adult	0.0	0.0	1.0	0.0	1.0	0.0	1.0	1660.2	sense;intronic;threeUTR;	KSLNATGILKGKCIQNELFLCENN	24	-1
1589	MTLYCVE	1660	7	embryo	0.479	0	False	EBZ_1660.2_sets_PL.dev-adult	0.0	0.0	1.0	0.0	1.0	0.0	1.0	1660.2	sense;intronic;threeUTR;	KSLNATGILKVRMTLYCVE	19	12
1590	MTLYCVE	1660	7	embryo	0.479	0	False	EBZ_1660.2_sets_PL.dev-adult	0.0	0.0	1.0	0.0	1.0	0.0	1.0	1660.2	sense;intronic;threeUTR;	KSLNATGILKGKCIQNELFLCENN	24	-1
1591	VRMTLYCVE	1660	9	PL	0.9241	0	False	EBZ_1660.2_sets_PL.dev-adult	0.0	0.0	1.0	0.0	1.0	0.0	1.0	1660.2	sense;intronic;threeUTR;	KSLNATGILKVRMTLYCVE	19	12
1592	VRMTLYCVE	1660	9	PL	0.9241	0	False	EBZ_1660.2_sets_PL.dev-adult	0.0	0.0	1.0	0.0	1.0	0.0	1.0	1660.2	sense;intronic;threeUTR;	KSLNATGILKGKCIQNELFLCENN	24	-1
1593	GLSLSLFPYIFEK	1661	13	dev-embryo.PL	0.0022157	0	False	EBZ_1661.1_sets_PL	1.0	0.0	0.0	0.0	0.0	0.0	0.0	1661.1	intergenic;	GLSLSLFPYIFEKKKTAQSYIPLKTIWRTIYFRQPKKTINL	41	-1
1594	TIYFRQPK	1661	8	dev-embryo.PL	0.14413	0	False	EBZ_1661.1_sets_PL	1.0	0.0	0.0	0.0	0.0	0.0	0.0	1661.1	intergenic;	GLSLSLFPYIFEKKKTAQSYIPLKTIWRTIYFRQPKKTINL	41	-1
1595	TIYFRQPKK	1661	9	PL	0.23106	0	False	EBZ_1661.1_sets_PL	1.0	0.0	0.0	0.0	0.0	0.0	0.0	1661.1	intergenic;	GLSLSLFPYIFEKKKTAQSYIPLKTIWRTIYFRQPKKTINL	41	-1
1596	GLSLSLFPYIFEKK	1661	14	dev-embryo	0.5493	0	False	EBZ_1661.1_sets_PL	1.0	0.0	0.0	0.0	0.0	0.0	0.0	1661.1	intergenic;	GLSLSLFPYIFEKKKTAQSYIPLKTIWRTIYFRQPKKTINL	41	-1
1597	KTAQSYIPLK	1661	10	dev-embryo	0.53538	0	False	EBZ_1661.1_sets_PL	1.0	0.0	0.0	0.0	0.0	0.0	0.0	1661.1	intergenic;	GLSLSLFPYIFEKKKTAQSYIPLKTIWRTIYFRQPKKTINL	41	-1
1598	IIDFDRR	1662	7	PL	0.1341	0	False	EBZ_1662.1_sets_PL	0.0	0.0	1.0	1.0	1.0	0.0	0.0	1662.1	sense;exonic;intronic;	FSHKSILCTKIIDFDRRKIAGASAAGQLHPSAHPGTPSRESQCS	44	-1
1599	RKIAGASAAGQLHPSAHPGTPSR	1662	23	PL	0.14703	0	False	EBZ_1662.1_sets_PL	0.0	0.0	1.0	1.0	1.0	0.0	0.0	1662.1	sense;exonic;intronic;	FSHKSILCTKIIDFDRRKIAGASAAGQLHPSAHPGTPSRESQCS	44	-1
1600	SILCTKIIDFDR	1662	12	PL	0.019714	0	False	EBZ_1662.1_sets_PL	0.0	0.0	1.0	1.0	1.0	0.0	0.0	1662.1	sense;exonic;intronic;	FSHKSILCTKIIDFDRRKIAGASAAGQLHPSAHPGTPSRESQCS	44	-1
1601	LLDSSTAIAHCSYR	1664	14	PL	6.554899999999999e-05	0	False	EBZ_1664.1_sets_PL	1.0	0.0	0.0	0.0	0.0	0.0	0.0	1664.1	intergenic;	QFGHSIEIFKLNCLANWICRPGRNERLDIRLLDSSTAIAHCSYRKPL	47	-1
1602	QFGHSIEIFK	1664	10	PL	0.41989	0	False	EBZ_1664.1_sets_PL	1.0	0.0	0.0	0.0	0.0	0.0	0.0	1664.1	intergenic;	QFGHSIEIFKLNCLANWICRPGRNERLDIRLLDSSTAIAHCSYRKPL	47	-1
1603	LSPSLMPHSIPR	1666	12	embryo	0.065764	0	False	EBZ_1666.1_sets_PL	0.0	0.0	1.0	0.0	1.0	0.0	1.0	1666.1	sense;intronic;threeUTR;	RLSPSLMPHSIPRNQAQRGRYVLGLVTYLLTPQNAES	37	6
1604	LSPSLMPHSIPRNQAQR	1666	17	embryo.PL	0.003582	0	False	EBZ_1666.1_sets_PL	0.0	0.0	1.0	0.0	1.0	0.0	1.0	1666.1	sense;intronic;threeUTR;	RLSPSLMPHSIPRNQAQRGRYVLGLVTYLLTPQNAES	37	6
1605	RLSPSLMPHSIPR	1666	13	embryo.PL	0.5192	0	False	EBZ_1666.1_sets_PL	0.0	0.0	1.0	0.0	1.0	0.0	1.0	1666.1	sense;intronic;threeUTR;	RLSPSLMPHSIPRNQAQRGRYVLGLVTYLLTPQNAES	37	6
1606	ELQVIGISHTLQANGFLR	1667	18	PL	0.0025102	0	False	EBZ_1667.1_sets_PL	0.0	1.0	0.0	0.0	0.0	0.0	0.0	1667.1	antisense;	ELQVIGISHTLQANGFLRENLIFGCPLLLTNIHRRFAFDFLLFEQQELAGLHFQGCFLASIEDFAALRDSPKVIFIAKGTGVSERGAGRNILANGHG	97	-1
1607	ENLIFGCPLLLTNIHRR	1667	17	dev-adult.PL	0.13748	0	False	EBZ_1667.1_sets_PL	0.0	1.0	0.0	0.0	0.0	0.0	0.0	1667.1	antisense;	ELQVIGISHTLQANGFLRENLIFGCPLLLTNIHRRFAFDFLLFEQQELAGLHFQGCFLASIEDFAALRDSPKVIFIAKGTGVSERGAGRNILANGHG	97	-1
1610	TTIGESPHR	1669	9	dev-embryo.PL	0.00033799	0	False	EBZ_1669.1_sets_PL	0.0	1.0	0.0	0.0	0.0	0.0	0.0	1669.1	antisense;	WECTPRKPYKPSPERTTIGESPHRRCPSSDPLWPIQKRFKLHHMILRTICMQN	53	43
1613	WECTPRK	1669	7	PL	0.54427	0	False	EBZ_1669.1_sets_PL	0.0	1.0	0.0	0.0	0.0	0.0	0.0	1669.1	antisense;	WECTPRKPYKPSPERTTIGESPHRRCPSSDPLWPIQKRFKLHHMILRTICMQN	53	43
1616	WECTPRKPYK	1669	10	dev-adult	0.13364	0	False	EBZ_1669.1_sets_PL	0.0	1.0	0.0	0.0	0.0	0.0	0.0	1669.1	antisense;	WECTPRKPYKPSPERTTIGESPHRRCPSSDPLWPIQKRFKLHHMILRTICMQN	53	43
1617	ITSEYIHHTSR	1673	11	dev-adult.embryo.PL	0.008837799999999998	0	False	EBZ_1673.1_sets_PL	0.0	1.0	0.0	0.0	0.0	0.0	0.0	1673.1	antisense;	ITSEYIHHTSRGNQGFNRSSDLLVGNNRDP	30	-1
1618	ITSEYIHHTSRGNQGFNR	1673	18	embryo.PL	0.18248	0	False	EBZ_1673.1_sets_PL	0.0	1.0	0.0	0.0	0.0	0.0	0.0	1673.1	antisense;	ITSEYIHHTSRGNQGFNRSSDLLVGNNRDP	30	-1
1619	GNQGFNRSSDLLVGNNR	1673	17	dev-adult	1.0962	0	False	EBZ_1673.1_sets_PL	0.0	1.0	0.0	0.0	0.0	0.0	0.0	1673.1	antisense;	ITSEYIHHTSRGNQGFNRSSDLLVGNNRDP	30	-1
1620	LIDTFVMSELFIFYLPF	1674	17	dev-adult.embryo.dev-embryo.PL	0.0039912	0	False	EBZ_1674.1_sets_PL	0.0	0.0	1.0	0.0	1.0	0.0	0.0	1674.1	sense;intronic;	KMLKKFGYHINEIMLTNSYGLYPYMRGLYNILNFFIYLYIQHLKLIDTFVMSELFIFYLPF	61	1
1621	FGYHINEIMLTNSYGLYPYMR	1674	21	dev-adult.PL	0.21055	0	False	EBZ_1674.1_sets_PL	0.0	0.0	1.0	0.0	1.0	0.0	0.0	1674.1	sense;intronic;	KMLKKFGYHINEIMLTNSYGLYPYMRGLYNILNFFIYLYIQHLKLIDTFVMSELFIFYLPF	61	1
1622	KFGYHINEIMLTNSYGLYPYMR	1674	22	dev-adult.dev-embryo	0.1514	0	False	EBZ_1674.1_sets_PL	0.0	0.0	1.0	0.0	1.0	0.0	0.0	1674.1	sense;intronic;	KMLKKFGYHINEIMLTNSYGLYPYMRGLYNILNFFIYLYIQHLKLIDTFVMSELFIFYLPF	61	1
1623	ASVIYAWSASIVCWIQAYRGR	1675	21	PL	0.0096087	0	False	EBZ_1675.1_sets_PL	0.0	1.0	0.0	0.0	0.0	0.0	0.0	1675.1	antisense;	ASVIYAWSASIVCWIQAYRGRLAN	24	-1
1624	FCLFCSLLQLPFWHTSINNNSK	1677	22	PL	0.13767	0	False	EBZ_1677.1_sets_PL	1.0	0.0	0.0	0.0	0.0	0.0	0.0	1677.1	intergenic;	KFELSKFCLFCSLLQLPFWHTSINNNSKNINLRMHVSTGCKEKRSQVLQQSFILLMNGLNFSTWKGNGKYGKM	73	33
1625	NINLRMHVSTGCK	1677	13	PL	0.0038399	0	False	EBZ_1677.1_sets_PL	1.0	0.0	0.0	0.0	0.0	0.0	0.0	1677.1	intergenic;	KFELSKFCLFCSLLQLPFWHTSINNNSKNINLRMHVSTGCKEKRSQVLQQSFILLMNGLNFSTWKGNGKYGKM	73	33
1626	SQVLQQSFILLMNGLNFSTWKGNGKYGK	1677	28	PL	0.14855	0	False	EBZ_1677.1_sets_PL	1.0	0.0	0.0	0.0	0.0	0.0	0.0	1677.1	intergenic;	KFELSKFCLFCSLLQLPFWHTSINNNSKNINLRMHVSTGCKEKRSQVLQQSFILLMNGLNFSTWKGNGKYGKM	73	33
1627	TTGGDINIATKPIVWMK	1678	17	PL	0.00515	0	False	EBZ_1678.1_sets_PL.dev-adult	0.0	1.0	0.0	0.0	0.0	0.0	0.0	1678.1	antisense;	TTGGDINIATKPIVWMKATP	20	15
1628	TTGGDINIATKPIVWMKATP	1678	20	PL	0.35995	0	False	EBZ_1678.1_sets_PL.dev-adult	0.0	1.0	0.0	0.0	0.0	0.0	0.0	1678.1	antisense;	TTGGDINIATKPIVWMKATP	20	15
1629	EESLEHNK	1680	8	PL	0.28502	0	False	EBZ_1680.1_sets_PL	0.0	0.0	1.0	0.0	1.0	0.0	0.0	1680.1	sense;intronic;	QTKTHFVEYLRGIKEESLEHNKKGS	25	-1
1630	EESLEHNKK	1680	9	PL	0.0031761	0	False	EBZ_1680.1_sets_PL	0.0	0.0	1.0	0.0	1.0	0.0	0.0	1680.1	sense;intronic;	QTKTHFVEYLRGIKEESLEHNKKGS	25	-1
1631	EESLEHNKKGS	1680	11	PL	0.11887	0	False	EBZ_1680.1_sets_PL	0.0	0.0	1.0	0.0	1.0	0.0	0.0	1680.1	sense;intronic;	QTKTHFVEYLRGIKEESLEHNKKGS	25	-1
1632	THFVEYLR	1680	8	PL	0.17263	0	False	EBZ_1680.1_sets_PL	0.0	0.0	1.0	0.0	1.0	0.0	0.0	1680.1	sense;intronic;	QTKTHFVEYLRGIKEESLEHNKKGS	25	-1
1633	IILDNEIK	1685	8	dev-adult.PL	0.024326	0	False	EBZ_1685.1_sets_PL	0.0	1.0	0.0	0.0	0.0	0.0	0.0	1685.1	antisense;	IILDNEIKYIMQTNKFN	17	10
1634	IILDNEIKYIMQTNK	1685	15	PL	0.0060402	0	False	EBZ_1685.1_sets_PL	0.0	1.0	0.0	0.0	0.0	0.0	0.0	1685.1	antisense;	IILDNEIKYIMQTNKFN	17	10
1635	IILDNEIKYIMQTNKFN	1685	17	PL	0.16113	0	False	EBZ_1685.1_sets_PL	0.0	1.0	0.0	0.0	0.0	0.0	0.0	1685.1	antisense;	IILDNEIKYIMQTNKFN	17	10
1636	YIMQTNK	1685	7	PL	0.16663	0	False	EBZ_1685.1_sets_PL	0.0	1.0	0.0	0.0	0.0	0.0	0.0	1685.1	antisense;	IILDNEIKYIMQTNKFN	17	10
1637	EGNWARVFR	1686	9	embryo	0.1076	0	False	EBZ_1686.1_sets_PL	0.0	0.0	1.0	0.0	1.0	0.0	0.0	1686.1	sense;intronic;	WQSICGSDEGIREGNWARVFRACLITSG	28	-1
1638	WQSICGSDEGIR	1686	12	dev-adult.embryo.PL	0.001207	0	False	EBZ_1686.1_sets_PL	0.0	0.0	1.0	0.0	1.0	0.0	0.0	1686.1	sense;intronic;	WQSICGSDEGIREGNWARVFRACLITSG	28	-1
1639	ACLITSG	1686	7	dev-adult	0.40631	0	False	EBZ_1686.1_sets_PL	0.0	0.0	1.0	0.0	1.0	0.0	0.0	1686.1	sense;intronic;	WQSICGSDEGIREGNWARVFRACLITSG	28	-1
1640	HVRTQTHHLSGTFAHAGPPGMK	1689	22	dev-adult.PL	0.015652000000000003	0	False	EBZ_1689.1_sets_PL	1.0	0.0	0.0	0.0	0.0	0.0	0.0	1689.1	intergenic;	LIFCRHIWMAEHPGGKNLPLITGRHVRTQTHHLSGTFAHAGPPGMKCILRIRMAGICSQVYFLRGRQLQPT	71	8
1641	IRMAGICSQVYFLRGR	1689	16	dev-adult.PL	0.14178	0	False	EBZ_1689.1_sets_PL	1.0	0.0	0.0	0.0	0.0	0.0	0.0	1689.1	intergenic;	LIFCRHIWMAEHPGGKNLPLITGRHVRTQTHHLSGTFAHAGPPGMKCILRIRMAGICSQVYFLRGRQLQPT	71	8
1642	MAGICSQVYFLR	1689	12	dev-adult.PL	0.12693	0	False	EBZ_1689.1_sets_PL	1.0	0.0	0.0	0.0	0.0	0.0	0.0	1689.1	intergenic;	LIFCRHIWMAEHPGGKNLPLITGRHVRTQTHHLSGTFAHAGPPGMKCILRIRMAGICSQVYFLRGRQLQPT	71	8
1643	SLLESNLFVMSQK	1691	13	dev-adult.embryo.dev-embryo.PL	0.00045322	0	False	EBZ_1691.1_sets_PL	0.0	1.0	0.0	0.0	0.0	0.0	0.0	1691.1	antisense;	TILILLFIAIQVALFANVAIIWLSNCGNTTVRRPGNCEKVENNRWRSNSNRNKLAKLVGKSLLESNLFVMSQKSACSGRPAHLTPQTPRILPTI	94	69
1644	VENNRWR	1691	7	embryo.PL	1.0447	0	False	EBZ_1691.1_sets_PL	0.0	1.0	0.0	0.0	0.0	0.0	0.0	1691.1	antisense;	TILILLFIAIQVALFANVAIIWLSNCGNTTVRRPGNCEKVENNRWRSNSNRNKLAKLVGKSLLESNLFVMSQKSACSGRPAHLTPQTPRILPTI	94	69
1645	VENNRWRSNSNR	1691	12	dev-adult.embryo.dev-embryo.PL	0.13432	0	False	EBZ_1691.1_sets_PL	0.0	1.0	0.0	0.0	0.0	0.0	0.0	1691.1	antisense;	TILILLFIAIQVALFANVAIIWLSNCGNTTVRRPGNCEKVENNRWRSNSNRNKLAKLVGKSLLESNLFVMSQKSACSGRPAHLTPQTPRILPTI	94	69
1646	WRSNSNRNK	1691	9	embryo	3.0157	0	False	EBZ_1691.1_sets_PL	0.0	1.0	0.0	0.0	0.0	0.0	0.0	1691.1	antisense;	TILILLFIAIQVALFANVAIIWLSNCGNTTVRRPGNCEKVENNRWRSNSNRNKLAKLVGKSLLESNLFVMSQKSACSGRPAHLTPQTPRILPTI	94	69
1647	SACSGRPAHLTPQTPRILPTI	1691	21	PL	0.39699	0	False	EBZ_1691.1_sets_PL	0.0	1.0	0.0	0.0	0.0	0.0	0.0	1691.1	antisense;	TILILLFIAIQVALFANVAIIWLSNCGNTTVRRPGNCEKVENNRWRSNSNRNKLAKLVGKSLLESNLFVMSQKSACSGRPAHLTPQTPRILPTI	94	69
1648	SLLESNLFVMSQKSACSGRPAHLTPQTPR	1691	29	PL	0.15699000000000002	0	False	EBZ_1691.1_sets_PL	0.0	1.0	0.0	0.0	0.0	0.0	0.0	1691.1	antisense;	TILILLFIAIQVALFANVAIIWLSNCGNTTVRRPGNCEKVENNRWRSNSNRNKLAKLVGKSLLESNLFVMSQKSACSGRPAHLTPQTPRILPTI	94	69
1650	ANVTWSAAAAASTVGK	1692	16	PL	0.011697	0	False	EBZ_1692.1_sets_PL	0.0	0.0	1.0	0.0	0.0	0.0	0.0	1692.1	sense;	TLQLCETVRWIFGFGFTWILCCRLLIAAVVNQKVKFQAAKGAQFVFQLQLRRKANVTWSAAAAASTVGKCNKAIEKMVENAMGSILRIRRVCLSVSGHLI	100	76
1652	ANVTWSAAAAASTVGKCNKAIEK	1692	23	PL	0.14689000000000002	0	False	EBZ_1692.1_sets_PL	0.0	0.0	1.0	0.0	0.0	0.0	0.0	1692.1	sense;	TLQLCETVRWIFGFGFTWILCCRLLIAAVVNQKVKFQAAKGAQFVFQLQLRRKANVTWSAAAAASTVGKCNKAIEKMVENAMGSILRIRRVCLSVSGHLI	100	76
1654	FQAAKGAQFVFQLQLR	1692	16	PL	1.0519	0	False	EBZ_1692.1_sets_PL	0.0	0.0	1.0	0.0	0.0	0.0	0.0	1692.1	sense;	TLQLCETVRWIFGFGFTWILCCRLLIAAVVNQKVKFQAAKGAQFVFQLQLRRKANVTWSAAAAASTVGKCNKAIEKMVENAMGSILRIRRVCLSVSGHLI	100	76
1656	KANVTWSAAAAASTVGKCNK	1692	20	PL	0.13073	0	False	EBZ_1692.1_sets_PL	0.0	0.0	1.0	0.0	0.0	0.0	0.0	1692.1	sense;	TLQLCETVRWIFGFGFTWILCCRLLIAAVVNQKVKFQAAKGAQFVFQLQLRRKANVTWSAAAAASTVGKCNKAIEKMVENAMGSILRIRRVCLSVSGHLI	100	76
1658	MVENAMGSILR	1692	11	PL	0.028278	0	False	EBZ_1692.1_sets_PL	0.0	0.0	1.0	0.0	0.0	0.0	0.0	1692.1	sense;	TLQLCETVRWIFGFGFTWILCCRLLIAAVVNQKVKFQAAKGAQFVFQLQLRRKANVTWSAAAAASTVGKCNKAIEKMVENAMGSILRIRRVCLSVSGHLI	100	76
1659	AGGSPLTAMAR	1695	11	PL	0.0029445	0	False	EBZ_1695.1_sets_PL	1.0	0.0	0.0	0.0	0.0	0.0	0.0	1695.1	intergenic;	FRTRVRGMEFAITPPSAPPTSGPAPLTAELRAGGSPLTAMARVVVRVIYALWVPPASVGNAPRTPNCQDVPGCACCQFLIAFPLTGPQLNY	91	7
1660	AVPSPGAR	1698	8	dev-adult.embryo.dev-embryo.PL	0.021791	0	False	EBZ_1698.1_sets_PL.dev-adult	0.0	1.0	0.0	0.0	0.0	0.0	0.0	1698.1	antisense;	LPELQEQQKAVPSPGARIAPQKNMKC	26	23
1661	LPELQEQQKAVPSPGARIAPQK	1698	22	dev-adult.embryo.dev-embryo.PL	0.00048589	0	False	EBZ_1698.1_sets_PL.dev-adult	0.0	1.0	0.0	0.0	0.0	0.0	0.0	1698.1	antisense;	LPELQEQQKAVPSPGARIAPQKNMKC	26	23
1662	IAPQKNMKC	1698	9	PL	2.6837	0	False	EBZ_1698.1_sets_PL.dev-adult	0.0	1.0	0.0	0.0	0.0	0.0	0.0	1698.1	antisense;	LPELQEQQKAVPSPGARIAPQKNMKC	26	23
1663	LPELQEQQK	1698	9	PL	0.40342	0	False	EBZ_1698.1_sets_PL.dev-adult	0.0	1.0	0.0	0.0	0.0	0.0	0.0	1698.1	antisense;	LPELQEQQKAVPSPGARIAPQKNMKC	26	23
1664	LPELQEQQKAVPSPGAR	1698	17	dev-embryo.PL	0.19357	0	False	EBZ_1698.1_sets_PL.dev-adult	0.0	1.0	0.0	0.0	0.0	0.0	0.0	1698.1	antisense;	LPELQEQQKAVPSPGARIAPQKNMKC	26	23
1665	LFFIVCFTQNR	1699	11	dev-adult.embryo.dev-embryo.PL	0.00098111	0	False	EBZ_1699.1_sets_PL	0.0	1.0	0.0	0.0	0.0	0.0	0.0	1699.1	antisense;	LFFIVCFTQNRYNYSSPWAQLINIQTKL	28	-1
1666	GATENENLENFAKKQAK	1701	17	dev-adult.embryo.dev-embryo.PL	0.010656	0	False	EBZ_1701.1_sets_PL.dev-adult	1.0	0.0	0.0	0.0	0.0	0.0	0.0	1701.1	intergenic;	TLFNIFISHIAQFAAVRGATENENLENFAKKQAKY	35	-1
1667	TLFNIFISHIAQFAAVRGATENENLENFAKK	1701	31	embryo	0.23802	0	False	EBZ_1701.1_sets_PL.dev-adult	1.0	0.0	0.0	0.0	0.0	0.0	0.0	1701.1	intergenic;	TLFNIFISHIAQFAAVRGATENENLENFAKKQAKY	35	-1
1668	TLFNIFISHIAQFAAVR	1701	17	dev-embryo.PL	0.15138	0	False	EBZ_1701.1_sets_PL.dev-adult	1.0	0.0	0.0	0.0	0.0	0.0	0.0	1701.1	intergenic;	TLFNIFISHIAQFAAVRGATENENLENFAKKQAKY	35	-1
1669	ARYAVDVVSQICNQEKR	1709	17	PL	0.35495	0	False	EBZ_1709.1_sets_PL	1.0	0.0	0.0	0.0	0.0	0.0	0.0	1709.1	intergenic;	MKARYAVDVVSQICNQEKRQQLVS	24	0
1670	MKARYAVDVVSQICNQEK	1709	18	dev-adult.PL	0.0017280999999999998	0	False	EBZ_1709.1_sets_PL	1.0	0.0	0.0	0.0	0.0	0.0	0.0	1709.1	intergenic;	MKARYAVDVVSQICNQEKRQQLVS	24	0
1671	YAVDVVSQICNQEK	1709	14	PL	0.50288	0	False	EBZ_1709.1_sets_PL	1.0	0.0	0.0	0.0	0.0	0.0	0.0	1709.1	intergenic;	MKARYAVDVVSQICNQEKRQQLVS	24	0
1672	KFLFPTRGVSTQSQCR	1710	16	PL	0.0073294	0	False	EBZ_1710.1_sets_PL	0.0	1.0	0.0	0.0	0.0	0.0	0.0	1710.1	antisense;	VQVRGRQVAGDRGRWRMKKFLFPTRGVSTQSQCRQVP	37	16
1673	KDVPANSIIWTSSSGDNFSTVFVWR	1714	25	PL	0.0040713	0	False	EBZ_1714.1_sets_PL	1.0	1.0	0.0	0.0	0.0	0.0	0.0	1714.1	intergenic;antisense;	IEHKKDVPANSIIWTSSSGDNFSTVFVWRRLRKSAFPSWDPLR	43	-1
1674	KSAFPSWDPLR	1714	11	PL	0.12847	0	False	EBZ_1714.1_sets_PL	1.0	1.0	0.0	0.0	0.0	0.0	0.0	1714.1	intergenic;antisense;	IEHKKDVPANSIIWTSSSGDNFSTVFVWRRLRKSAFPSWDPLR	43	-1
1675	DVPANSIIWTSSSGDNFSTVFVWRR	1714	25	dev-adult	0.12481	0	False	EBZ_1714.1_sets_PL	1.0	1.0	0.0	0.0	0.0	0.0	0.0	1714.1	intergenic;antisense;	IEHKKDVPANSIIWTSSSGDNFSTVFVWRRLRKSAFPSWDPLR	43	-1
1676	AIFFYMTQFLAMK	1715	13	embryo.PL	0.10815	0	False	EBZ_1715.1_sets_PL	1.0	0.0	0.0	0.0	0.0	0.0	0.0	1715.1	intergenic;	KAIFFYMTQFLAMKTI	16	6
1677	KAIFFYMTQFLAMKTI	1715	16	embryo.dev-embryo.PL	0.0031499	0	False	EBZ_1715.1_sets_PL	1.0	0.0	0.0	0.0	0.0	0.0	0.0	1715.1	intergenic;	KAIFFYMTQFLAMKTI	16	6
1678	QSLVQELEYR	1717	10	dev-embryo.PL	0.0012486	0	False	EBZ_1717.1_sets_PL	1.0	0.0	0.0	0.0	0.0	0.0	0.0	1717.1	intergenic;	QSLVQELEYRNLKRYKKIGSSMT	23	21
1679	QSLVQELEYRNLK	1717	13	dev-embryo.PL	0.2042	0	False	EBZ_1717.1_sets_PL	1.0	0.0	0.0	0.0	0.0	0.0	0.0	1717.1	intergenic;	QSLVQELEYRNLKRYKKIGSSMT	23	21
1680	IEEQRCRHNLQWR	1718	13	embryo.dev-adult	0.0060019	0	False	EBZ_1718.1_sets_PL	2.0	1.0	1.0	0.0	1.0	0.0	0.0	1718.1	intergenic;antisense;sense;intronic;	IEEQRCRHNLQWRLYLLFELSPSDGAGVGGVLYAHMVCGQRSYVFLVFKWILLLRSHLDRTLYTTCL	67	35
1681	LYLLFELSPSDGAGVGGVLYAHMVCGQR	1718	28	embryo	0.25801	0	False	EBZ_1718.1_sets_PL	2.0	1.0	1.0	0.0	1.0	0.0	0.0	1718.1	intergenic;antisense;sense;intronic;	IEEQRCRHNLQWRLYLLFELSPSDGAGVGGVLYAHMVCGQRSYVFLVFKWILLLRSHLDRTLYTTCL	67	35
1682	WILLLRSHLDR	1718	11	embryo	0.18538	0	False	EBZ_1718.1_sets_PL	2.0	1.0	1.0	0.0	1.0	0.0	0.0	1718.1	intergenic;antisense;sense;intronic;	IEEQRCRHNLQWRLYLLFELSPSDGAGVGGVLYAHMVCGQRSYVFLVFKWILLLRSHLDRTLYTTCL	67	35
1683	IEEQRCR	1718	7	dev-adult	0.37066	0	False	EBZ_1718.1_sets_PL	2.0	1.0	1.0	0.0	1.0	0.0	0.0	1718.1	intergenic;antisense;sense;intronic;	IEEQRCRHNLQWRLYLLFELSPSDGAGVGGVLYAHMVCGQRSYVFLVFKWILLLRSHLDRTLYTTCL	67	35
1684	SHLDRTLYTTCL	1718	12	dev-adult	0.01322	0	False	EBZ_1718.1_sets_PL	2.0	1.0	1.0	0.0	1.0	0.0	0.0	1718.1	intergenic;antisense;sense;intronic;	IEEQRCRHNLQWRLYLLFELSPSDGAGVGGVLYAHMVCGQRSYVFLVFKWILLLRSHLDRTLYTTCL	67	35
1685	SYVFLVFK	1718	8	dev-adult	0.12825	0	False	EBZ_1718.1_sets_PL	2.0	1.0	1.0	0.0	1.0	0.0	0.0	1718.1	intergenic;antisense;sense;intronic;	IEEQRCRHNLQWRLYLLFELSPSDGAGVGGVLYAHMVCGQRSYVFLVFKWILLLRSHLDRTLYTTCL	67	35
1686	IEYFGFELSNEK	1719	12	embryo.PL	0.15079	0	False	EBZ_1719.1_sets_PL.dev-adult	0.0	0.0	2.0	0.0	2.0	0.0	0.0	1719.1	sense;intronic;	RKIEYFGFELSNEKSGQTHEKF	22	-1
1687	IEYFGFELSNEKSGQTHEKF	1719	20	dev-adult.embryo.PL	0.0011527000000000002	0	False	EBZ_1719.1_sets_PL.dev-adult	0.0	0.0	2.0	0.0	2.0	0.0	0.0	1719.1	sense;intronic;	RKIEYFGFELSNEKSGQTHEKF	22	-1
1688	SLYVCINMHLLK	1720	12	embryo.PL	0.0038005	0	False	EBZ_1720.1_sets_PL	0.0	0.0	3.0	0.0	3.0	0.0	0.0	1720.1	sense;intronic;	SLYVCINMHLLKHVFRS	17	7
1689	FGGFTAPQNR	1724	10	embryo.PL	0.13563	0	False	EBZ_1724.1_sets_PL	0.0	0.0	1.0	0.0	1.0	0.0	0.0	1724.1	sense;intronic;	IYNNRSSADLRNLHFAMGPEIAKMSRFGGFTAPQNRISFCLCAFREIRRRSALNQTVVV	59	16
1690	FGGFTAPQNRISFCLCAFREIR	1724	22	embryo	0.22712	0	False	EBZ_1724.1_sets_PL	0.0	0.0	1.0	0.0	1.0	0.0	0.0	1724.1	sense;intronic;	IYNNRSSADLRNLHFAMGPEIAKMSRFGGFTAPQNRISFCLCAFREIRRRSALNQTVVV	59	16
1691	ISFCLCAFR	1724	9	embryo.dev-embryo	0.41339	0	False	EBZ_1724.1_sets_PL	0.0	0.0	1.0	0.0	1.0	0.0	0.0	1724.1	sense;intronic;	IYNNRSSADLRNLHFAMGPEIAKMSRFGGFTAPQNRISFCLCAFREIRRRSALNQTVVV	59	16
1692	ISFCLCAFREIR	1724	12	dev-adult.embryo.PL	0.17739000000000002	0	False	EBZ_1724.1_sets_PL	0.0	0.0	1.0	0.0	1.0	0.0	0.0	1724.1	sense;intronic;	IYNNRSSADLRNLHFAMGPEIAKMSRFGGFTAPQNRISFCLCAFREIRRRSALNQTVVV	59	16
1693	IYNNRSSADLR	1724	11	embryo	0.18476	0	False	EBZ_1724.1_sets_PL	0.0	0.0	1.0	0.0	1.0	0.0	0.0	1724.1	sense;intronic;	IYNNRSSADLRNLHFAMGPEIAKMSRFGGFTAPQNRISFCLCAFREIRRRSALNQTVVV	59	16
1694	NLHFAMGPEIAK	1724	12	dev-adult.embryo.dev-embryo.PL	0.0028845	0	False	EBZ_1724.1_sets_PL	0.0	0.0	1.0	0.0	1.0	0.0	0.0	1724.1	sense;intronic;	IYNNRSSADLRNLHFAMGPEIAKMSRFGGFTAPQNRISFCLCAFREIRRRSALNQTVVV	59	16
1695	NLHFAMGPEIAKMSR	1724	15	dev-adult.embryo.dev-embryo.PL	0.10012	0	False	EBZ_1724.1_sets_PL	0.0	0.0	1.0	0.0	1.0	0.0	0.0	1724.1	sense;intronic;	IYNNRSSADLRNLHFAMGPEIAKMSRFGGFTAPQNRISFCLCAFREIRRRSALNQTVVV	59	16
1696	ISFCLCAFREIRR	1724	13	dev-embryo.PL	0.35782	0	False	EBZ_1724.1_sets_PL	0.0	0.0	1.0	0.0	1.0	0.0	0.0	1724.1	sense;intronic;	IYNNRSSADLRNLHFAMGPEIAKMSRFGGFTAPQNRISFCLCAFREIRRRSALNQTVVV	59	16
1697	SSADLRNLHFAMGPEIAK	1724	18	PL	0.96096	0	False	EBZ_1724.1_sets_PL	0.0	0.0	1.0	0.0	1.0	0.0	0.0	1724.1	sense;intronic;	IYNNRSSADLRNLHFAMGPEIAKMSRFGGFTAPQNRISFCLCAFREIRRRSALNQTVVV	59	16
1698	SSADLRNLHFAMGPEIAKMSR	1724	21	PL	0.39269	0	False	EBZ_1724.1_sets_PL	0.0	0.0	1.0	0.0	1.0	0.0	0.0	1724.1	sense;intronic;	IYNNRSSADLRNLHFAMGPEIAKMSRFGGFTAPQNRISFCLCAFREIRRRSALNQTVVV	59	16
1699	ELNSISKNPSNGIDVFLLGHNK	1731	22	PL	0.005421199999999999	0	False	EBZ_1731.1_sets_PL	1.0	0.0	0.0	0.0	0.0	0.0	0.0	1731.1	intergenic;	ELNSISKNPSNGIDVFLLGHNK	22	-1
1700	LLRSIITIMVYHGIKM	1733	16	PL	0.38725	0	False	EBZ_1733.1_sets_PL	0.0	0.0	1.0	0.0	1.0	0.0	0.0	1733.1	sense;intronic;	TTLNATCQLAERKLMLRLLRSIITIMVYHGIKM	33	14
1701	TTLNATCQLAER	1733	12	dev-adult.PL	0.0073576000000000015	0	False	EBZ_1733.1_sets_PL	0.0	0.0	1.0	0.0	1.0	0.0	0.0	1733.1	sense;intronic;	TTLNATCQLAERKLMLRLLRSIITIMVYHGIKM	33	14
1702	TTLNATCQLAERKLMLR	1733	17	PL	0.38083	0	False	EBZ_1733.1_sets_PL	0.0	0.0	1.0	0.0	1.0	0.0	0.0	1733.1	sense;intronic;	TTLNATCQLAERKLMLRLLRSIITIMVYHGIKM	33	14
1703	TTLNATCQLAERK	1733	13	dev-adult	0.11196	0	False	EBZ_1733.1_sets_PL	0.0	0.0	1.0	0.0	1.0	0.0	0.0	1733.1	sense;intronic;	TTLNATCQLAERKLMLRLLRSIITIMVYHGIKM	33	14
1704	LVQNIIFAHTSMFD	1734	14	dev-adult.embryo.PL	0.0013382	0	False	EBZ_1734.1_sets_PL	0.0	1.0	0.0	0.0	0.0	0.0	0.0	1734.1	antisense;	KLVQNIIFAHTSMFD	15	12
1705	HLLDKDKR	1735	8	embryo.PL	0.0015661	0	False	EBZ_1735.1_sets_PL	0.0	1.0	0.0	0.0	0.0	0.0	0.0	1735.1	antisense;	KKIPICQVTFPQLRDITNAFEEGWDDFEKISGCQGLEHWGVKKHLLDKDKRRAGTLKIIIEARTLEPLYLNTYINIYAWGQHYF	84	-1
1706	IIIEARTLEPLYLNTYINIYAWGQHYF	1735	27	embryo	0.15557	0	False	EBZ_1735.1_sets_PL	0.0	1.0	0.0	0.0	0.0	0.0	0.0	1735.1	antisense;	KKIPICQVTFPQLRDITNAFEEGWDDFEKISGCQGLEHWGVKKHLLDKDKRRAGTLKIIIEARTLEPLYLNTYINIYAWGQHYF	84	-1
1707	IPICQVTFPQLR	1735	12	embryo.PL	0.076435	0	False	EBZ_1735.1_sets_PL	0.0	1.0	0.0	0.0	0.0	0.0	0.0	1735.1	antisense;	KKIPICQVTFPQLRDITNAFEEGWDDFEKISGCQGLEHWGVKKHLLDKDKRRAGTLKIIIEARTLEPLYLNTYINIYAWGQHYF	84	-1
1708	ISGCQGLEHWGVK	1735	13	embryo	0.22345	0	False	EBZ_1735.1_sets_PL	0.0	1.0	0.0	0.0	0.0	0.0	0.0	1735.1	antisense;	KKIPICQVTFPQLRDITNAFEEGWDDFEKISGCQGLEHWGVKKHLLDKDKRRAGTLKIIIEARTLEPLYLNTYINIYAWGQHYF	84	-1
1709	TLEPLYLNTYINIYAWGQHYF	1735	21	embryo	0.16319	0	False	EBZ_1735.1_sets_PL	0.0	1.0	0.0	0.0	0.0	0.0	0.0	1735.1	antisense;	KKIPICQVTFPQLRDITNAFEEGWDDFEKISGCQGLEHWGVKKHLLDKDKRRAGTLKIIIEARTLEPLYLNTYINIYAWGQHYF	84	-1
1710	KHLLDKDK	1735	8	PL	0.26857	0	False	EBZ_1735.1_sets_PL	0.0	1.0	0.0	0.0	0.0	0.0	0.0	1735.1	antisense;	KKIPICQVTFPQLRDITNAFEEGWDDFEKISGCQGLEHWGVKKHLLDKDKRRAGTLKIIIEARTLEPLYLNTYINIYAWGQHYF	84	-1
1711	LIEEIMTVFFFK	1742	12	PL	0.0039372	0	False	EBZ_1742.1_sets_PL	0.0	0.0	1.0	0.0	1.0	0.0	0.0	1742.1	sense;intronic;	LIEEIMTVFFFKFPR	15	5
1712	VAVTGLGSSSRVLGPQNMR	1743	19	dev-adult.embryo.PL	0.018575	0	False	EBZ_1743.1_sets_PL	1.0	0.0	0.0	0.0	0.0	0.0	0.0	1743.1	intergenic;	VAVTGLGSSSRVLGPQNMRKTLIFAR	26	17
1713	VLGPQNMR	1743	8	embryo.PL	0.13995	0	False	EBZ_1743.1_sets_PL	1.0	0.0	0.0	0.0	0.0	0.0	0.0	1743.1	intergenic;	VAVTGLGSSSRVLGPQNMRKTLIFAR	26	17
1714	VLGPQNMRK	1743	9	embryo	0.47071	0	False	EBZ_1743.1_sets_PL	1.0	0.0	0.0	0.0	0.0	0.0	0.0	1743.1	intergenic;	VAVTGLGSSSRVLGPQNMRKTLIFAR	26	17
1715	CTLNSAREKR	1749	10	embryo	0.071906	0	False	EBZ_1749.1_sets_PL	0.0	1.0	0.0	0.0	0.0	0.0	0.0	1749.1	antisense;	VINNFRTQLNKVTKCTLNSAREKRKED	27	-1
1716	VTKCTLNSAREK	1749	12	dev-adult.dev-embryo.PL	0.0032659	0	False	EBZ_1749.1_sets_PL	0.0	1.0	0.0	0.0	0.0	0.0	0.0	1749.1	antisense;	VINNFRTQLNKVTKCTLNSAREKRKED	27	-1
1717	VINNFRTQLNK	1749	11	dev-adult	0.92125	0	False	EBZ_1749.1_sets_PL	0.0	1.0	0.0	0.0	0.0	0.0	0.0	1749.1	antisense;	VINNFRTQLNKVTKCTLNSAREKRKED	27	-1
1718	SYWHTNICIPCMFTNR	1750	16	embryo.PL	0.0088049	0	False	EBZ_1750.1_sets_PL	0.0	0.0	1.0	0.0	0.0	0.0	1.0	1750.1	sense;threeUTR;	SYWHTNICIPCMFTNRIPIN	20	11
1719	SYWHTNICIPCMFTNRIPIN	1750	20	PL	0.21545	0	False	EBZ_1750.1_sets_PL	0.0	0.0	1.0	0.0	0.0	0.0	1.0	1750.1	sense;threeUTR;	SYWHTNICIPCMFTNRIPIN	20	11
1720	VQGEVEAVEFPQGAPLFGHAMYLFLK	1753	26	dev-adult.PL	0.0014700999999999998	0	False	EBZ_1753.1_sets_PL	0.0	0.0	2.0	2.0	0.0	0.0	0.0	1753.1	sense;exonic;	GQDRVAGVGHHGNGRVQGEVEAVEFPQGAPLFGHAMYLFLKY	42	35
1721	VQGEVEAVEFPQGAPLFGHAMYLFLKY	1753	27	PL	0.15742	0	False	EBZ_1753.1_sets_PL	0.0	0.0	2.0	2.0	0.0	0.0	0.0	1753.1	sense;exonic;	GQDRVAGVGHHGNGRVQGEVEAVEFPQGAPLFGHAMYLFLKY	42	35
1722	FACESSTRWVLDFCLWK	1756	17	embryo.PL	0.14068	0	False	EBZ_1756.1_sets_PL	0.0	0.0	1.0	0.0	1.0	0.0	0.0	1756.1	sense;intronic;	KHHEIHRIKCDYEICAPQCDGGTIQLTPSVHGKFACESSTRWVLDFCLWKMSVNFVDPRTRELRGRQVSEFPTLFRA	77	50
1723	FACESSTRWVLDFCLWKMSVNFVDPR	1756	26	embryo	0.4361600000000001	0	False	EBZ_1756.1_sets_PL	0.0	0.0	1.0	0.0	1.0	0.0	0.0	1756.1	sense;intronic;	KHHEIHRIKCDYEICAPQCDGGTIQLTPSVHGKFACESSTRWVLDFCLWKMSVNFVDPRTRELRGRQVSEFPTLFRA	77	50
1724	HHEIHRIK	1756	8	embryo.PL	0.16224	0	False	EBZ_1756.1_sets_PL	0.0	0.0	1.0	0.0	1.0	0.0	0.0	1756.1	sense;intronic;	KHHEIHRIKCDYEICAPQCDGGTIQLTPSVHGKFACESSTRWVLDFCLWKMSVNFVDPRTRELRGRQVSEFPTLFRA	77	50
1725	MSVNFVDPR	1756	9	embryo.PL	0.00076523	0	False	EBZ_1756.1_sets_PL	0.0	0.0	1.0	0.0	1.0	0.0	0.0	1756.1	sense;intronic;	KHHEIHRIKCDYEICAPQCDGGTIQLTPSVHGKFACESSTRWVLDFCLWKMSVNFVDPRTRELRGRQVSEFPTLFRA	77	50
1726	MSVNFVDPRTRELR	1756	14	embryo.PL	0.32393	0	False	EBZ_1756.1_sets_PL	0.0	0.0	1.0	0.0	1.0	0.0	0.0	1756.1	sense;intronic;	KHHEIHRIKCDYEICAPQCDGGTIQLTPSVHGKFACESSTRWVLDFCLWKMSVNFVDPRTRELRGRQVSEFPTLFRA	77	50
1727	QVSEFPTLFR	1756	10	embryo	0.14985	0	False	EBZ_1756.1_sets_PL	0.0	0.0	1.0	0.0	1.0	0.0	0.0	1756.1	sense;intronic;	KHHEIHRIKCDYEICAPQCDGGTIQLTPSVHGKFACESSTRWVLDFCLWKMSVNFVDPRTRELRGRQVSEFPTLFRA	77	50
1728	KHHEIHR	1756	7	PL	0.13669	0	False	EBZ_1756.1_sets_PL	0.0	0.0	1.0	0.0	1.0	0.0	0.0	1756.1	sense;intronic;	KHHEIHRIKCDYEICAPQCDGGTIQLTPSVHGKFACESSTRWVLDFCLWKMSVNFVDPRTRELRGRQVSEFPTLFRA	77	50
1729	WVLDFCLWK	1756	9	PL	0.40096	0	False	EBZ_1756.1_sets_PL	0.0	0.0	1.0	0.0	1.0	0.0	0.0	1756.1	sense;intronic;	KHHEIHRIKCDYEICAPQCDGGTIQLTPSVHGKFACESSTRWVLDFCLWKMSVNFVDPRTRELRGRQVSEFPTLFRA	77	50
1730	WVLDFCLWKMSVNFVDPRTR	1756	20	PL	0.3907	0	False	EBZ_1756.1_sets_PL	0.0	0.0	1.0	0.0	1.0	0.0	0.0	1756.1	sense;intronic;	KHHEIHRIKCDYEICAPQCDGGTIQLTPSVHGKFACESSTRWVLDFCLWKMSVNFVDPRTRELRGRQVSEFPTLFRA	77	50
1731	DLNSLAMFLELWSWGLLSANK	1757	21	dev-adult.PL	0.0022316	0	False	EBZ_1757.1_sets_PL	1.0	0.0	0.0	0.0	0.0	0.0	0.0	1757.1	intergenic;	SAKLACRRDCNSSVSTIDPVRGVRQLAATFSGTPPNECERVASVHLHTSPINQRDLNSLAMFLELWSWGLLSANKQKSHLLHR	83	60
1732	SSSKIVFLCFFFSNLLDIPK	1759	20	dev-adult.embryo.dev-embryo.PL	0.0008891	0	False	EBZ_1759.1_sets_PL	1.0	0.0	0.0	0.0	0.0	0.0	0.0	1759.1	intergenic;	SSSKIVFLCFFFSNLLDIPKSFCKIFALSPVISCPTLPISKGNNLNQISSTLNILVQ	57	-1
1733	IFALSPVISCPTLPISK	1759	17	PL	0.53743	0	False	EBZ_1759.1_sets_PL	1.0	0.0	0.0	0.0	0.0	0.0	0.0	1759.1	intergenic;	SSSKIVFLCFFFSNLLDIPKSFCKIFALSPVISCPTLPISKGNNLNQISSTLNILVQ	57	-1
1734	IVFLCFFFSNLLDIPK	1759	16	dev-embryo	0.22229	0	False	EBZ_1759.1_sets_PL	1.0	0.0	0.0	0.0	0.0	0.0	0.0	1759.1	intergenic;	SSSKIVFLCFFFSNLLDIPKSFCKIFALSPVISCPTLPISKGNNLNQISSTLNILVQ	57	-1
1735	FHLVCTAFR	1771	9	embryo.PL	0.00017328	0	False	EBZ_1771.1_sets_PL	0.0	0.0	1.0	0.0	1.0	0.0	0.0	1771.1	sense;intronic;	NYLRILFMKTPFQIDLSVTRRTTPKFHLVCTAFRPVMFIFPAAS	44	7
1736	FHLVCTAFRPVMFIFPAAS	1771	19	embryo	0.20466	0	False	EBZ_1771.1_sets_PL	0.0	0.0	1.0	0.0	1.0	0.0	0.0	1771.1	sense;intronic;	NYLRILFMKTPFQIDLSVTRRTTPKFHLVCTAFRPVMFIFPAAS	44	7
1737	ILFMKTPFQIDLSVTRR	1771	17	embryo	0.3952	0	False	EBZ_1771.1_sets_PL	0.0	0.0	1.0	0.0	1.0	0.0	0.0	1771.1	sense;intronic;	NYLRILFMKTPFQIDLSVTRRTTPKFHLVCTAFRPVMFIFPAAS	44	7
1738	NYLRILFMK	1771	9	embryo	1.0176	0	False	EBZ_1771.1_sets_PL	0.0	0.0	1.0	0.0	1.0	0.0	0.0	1771.1	sense;intronic;	NYLRILFMKTPFQIDLSVTRRTTPKFHLVCTAFRPVMFIFPAAS	44	7
1739	RTTPKFHLVCTAFR	1771	14	embryo	0.12951	0	False	EBZ_1771.1_sets_PL	0.0	0.0	1.0	0.0	1.0	0.0	0.0	1771.1	sense;intronic;	NYLRILFMKTPFQIDLSVTRRTTPKFHLVCTAFRPVMFIFPAAS	44	7
1740	ILFMKTPFQIDLSVTR	1771	16	PL	0.21136	0	False	EBZ_1771.1_sets_PL	0.0	0.0	1.0	0.0	1.0	0.0	0.0	1771.1	sense;intronic;	NYLRILFMKTPFQIDLSVTRRTTPKFHLVCTAFRPVMFIFPAAS	44	7
1741	LLLEIWR	1775	7	PL	0.43801	0	False	EBZ_1775.1_sets_PL	0.0	0.0	1.0	0.0	1.0	0.0	0.0	1775.1	sense;intronic;	QRQLNETAAKKILRTKLRLLLEIWRTTGINSEQAIYCRWKHTSVPF	46	-1
1742	LLLEIWRTTGINSEQAIYCR	1775	20	dev-adult.PL	0.0013868	0	False	EBZ_1775.1_sets_PL	0.0	0.0	1.0	0.0	1.0	0.0	0.0	1775.1	sense;intronic;	QRQLNETAAKKILRTKLRLLLEIWRTTGINSEQAIYCRWKHTSVPF	46	-1
1743	LLLEIWRTTGINSEQAIYCRWK	1775	22	PL	0.39747	0	False	EBZ_1775.1_sets_PL	0.0	0.0	1.0	0.0	1.0	0.0	0.0	1775.1	sense;intronic;	QRQLNETAAKKILRTKLRLLLEIWRTTGINSEQAIYCRWKHTSVPF	46	-1
1744	SIALCCK	1776	7	PL	0.5326	0	False	EBZ_1776.1_sets_PL	0.0	0.0	1.0	0.0	1.0	0.0	0.0	1776.1	sense;intronic;	FRRFKKVNSVLDVHFLCIGTRGLGTGDRKSIALCCKMGSTSTV	43	36
1745	VNSVLDVHFLCIGTR	1776	15	PL	0.0037124	0	False	EBZ_1776.1_sets_PL	0.0	0.0	1.0	0.0	1.0	0.0	0.0	1776.1	sense;intronic;	FRRFKKVNSVLDVHFLCIGTRGLGTGDRKSIALCCKMGSTSTV	43	36
1746	EHESITVWMPLK	1777	12	embryo	0.14592	0	False	EBZ_1777.1_sets_PL	1.0	0.0	0.0	0.0	0.0	0.0	0.0	1777.1	intergenic;	VLNNMLLALNAFFGTQKKSKIMIQRLTIVMSLIPLRQERGAARNLKEHESITVWMPLKISISKQQEKPK	69	4
1747	ISISKQQEK	1777	9	embryo.PL	0.020728	0	False	EBZ_1777.1_sets_PL	1.0	0.0	0.0	0.0	0.0	0.0	0.0	1777.1	intergenic;	VLNNMLLALNAFFGTQKKSKIMIQRLTIVMSLIPLRQERGAARNLKEHESITVWMPLKISISKQQEKPK	69	4
1748	LTIVMSLIPLR	1777	11	embryo	0.21747	0	False	EBZ_1777.1_sets_PL	1.0	0.0	0.0	0.0	0.0	0.0	0.0	1777.1	intergenic;	VLNNMLLALNAFFGTQKKSKIMIQRLTIVMSLIPLRQERGAARNLKEHESITVWMPLKISISKQQEKPK	69	4
1749	NLKEHESITVWMPLK	1777	15	embryo	0.1611	0	False	EBZ_1777.1_sets_PL	1.0	0.0	0.0	0.0	0.0	0.0	0.0	1777.1	intergenic;	VLNNMLLALNAFFGTQKKSKIMIQRLTIVMSLIPLRQERGAARNLKEHESITVWMPLKISISKQQEKPK	69	4
1750	VLNNMLLALNAFFGTQKK	1777	18	embryo	0.13757	0	False	EBZ_1777.1_sets_PL	1.0	0.0	0.0	0.0	0.0	0.0	0.0	1777.1	intergenic;	VLNNMLLALNAFFGTQKKSKIMIQRLTIVMSLIPLRQERGAARNLKEHESITVWMPLKISISKQQEKPK	69	4
1751	VLNNMLLALNAFFGTQKKSK	1777	20	embryo	0.16713	0	False	EBZ_1777.1_sets_PL	1.0	0.0	0.0	0.0	0.0	0.0	0.0	1777.1	intergenic;	VLNNMLLALNAFFGTQKKSKIMIQRLTIVMSLIPLRQERGAARNLKEHESITVWMPLKISISKQQEKPK	69	4
1752	IMIQRLTIVMSLIPLRQER	1777	19	PL	0.35008	0	False	EBZ_1777.1_sets_PL	1.0	0.0	0.0	0.0	0.0	0.0	0.0	1777.1	intergenic;	VLNNMLLALNAFFGTQKKSKIMIQRLTIVMSLIPLRQERGAARNLKEHESITVWMPLKISISKQQEKPK	69	4
1753	ISISKQQEKPK	1777	11	PL	0.010841	0	False	EBZ_1777.1_sets_PL	1.0	0.0	0.0	0.0	0.0	0.0	0.0	1777.1	intergenic;	VLNNMLLALNAFFGTQKKSKIMIQRLTIVMSLIPLRQERGAARNLKEHESITVWMPLKISISKQQEKPK	69	4
1754	HFRWPGQK	1786	8	PL	0.046551	0	False	EBZ_1786.1_sets_PL	0.0	0.0	1.0	0.0	1.0	0.0	0.0	1786.1	sense;intronic;	LDRWFFASFVWVRVRPKAQRHFRWPGQKKKNRLPN	35	-1
1755	LDRWFFASFVWVR	1786	13	dev-adult.PL	0.014804	0	False	EBZ_1786.1_sets_PL	0.0	0.0	1.0	0.0	1.0	0.0	0.0	1786.1	sense;intronic;	LDRWFFASFVWVRVRPKAQRHFRWPGQKKKNRLPN	35	-1
1756	TLQQLLSAFR	1788	10	dev-embryo.PL	0.056884	0	False	EBZ_1788.1_sets_PL	0.0	0.0	1.0	0.0	1.0	0.0	0.0	1788.1	sense;intronic;	TLQQLLSAFRTSHGMGV	17	14
1757	TLQQLLSAFRTSHGMGV	1788	17	PL	0.028615	0	False	EBZ_1788.1_sets_PL	0.0	0.0	1.0	0.0	1.0	0.0	0.0	1788.1	sense;intronic;	TLQQLLSAFRTSHGMGV	17	14
1758	QLQLSTTSNLVAK	1789	13	PL	0.0013137	0	False	EBZ_1789.1_sets_PL	0.0	1.0	0.0	0.0	0.0	0.0	0.0	1789.1	antisense;	FSARRGHSCRQLQLSTTSNLVAKPNPGQKSCTVQVLVQWFSFLGQLRGEVPASALSSCHRVEKVIIFDL	69	-1
1759	QLQLSTTSNLVAKPNPGQK	1789	19	dev-adult.PL	0.0019787	0	False	EBZ_1789.1_sets_PL	0.0	1.0	0.0	0.0	0.0	0.0	0.0	1789.1	antisense;	FSARRGHSCRQLQLSTTSNLVAKPNPGQKSCTVQVLVQWFSFLGQLRGEVPASALSSCHRVEKVIIFDL	69	-1
1760	FIMPTHPKCCK	1790	11	embryo	0.18552	0	False	EBZ_1790.1_sets_PL	0.0	0.0	1.0	0.0	1.0	0.0	0.0	1790.1	sense;intronic;	RRKQSVKFNNQISDKLFDRFIMPTHPKCCKGQRTVQTQHLAESIRSGSLW	50	21
1761	GQRTVQTQHLAESIR	1790	15	embryo	0.19408	0	False	EBZ_1790.1_sets_PL	0.0	0.0	1.0	0.0	1.0	0.0	0.0	1790.1	sense;intronic;	RRKQSVKFNNQISDKLFDRFIMPTHPKCCKGQRTVQTQHLAESIRSGSLW	50	21
1762	GQRTVQTQHLAESIRSGSLW	1790	20	embryo	0.36642	0	False	EBZ_1790.1_sets_PL	0.0	0.0	1.0	0.0	1.0	0.0	0.0	1790.1	sense;intronic;	RRKQSVKFNNQISDKLFDRFIMPTHPKCCKGQRTVQTQHLAESIRSGSLW	50	21
1763	QSVKFNNQISDK	1790	12	dev-adult.embryo.PL	0.0061489	0	False	EBZ_1790.1_sets_PL	0.0	0.0	1.0	0.0	1.0	0.0	0.0	1790.1	sense;intronic;	RRKQSVKFNNQISDKLFDRFIMPTHPKCCKGQRTVQTQHLAESIRSGSLW	50	21
1764	TVQTQHLAESIR	1790	12	embryo	0.21526	0	False	EBZ_1790.1_sets_PL	0.0	0.0	1.0	0.0	1.0	0.0	0.0	1790.1	sense;intronic;	RRKQSVKFNNQISDKLFDRFIMPTHPKCCKGQRTVQTQHLAESIRSGSLW	50	21
1765	IISKHSFSWFCHINIVLK	1793	18	dev-adult.dev-embryo.PL	0.0028559	0	False	EBZ_1793.1_sets_PL.dev-embryo	0.0	1.0	0.0	0.0	0.0	0.0	0.0	1793.1	antisense;	HFHYLYRIISKHSFSWFCHINIVLKTRIWWIKKWFIIIIRLPWVLFSIFIFKVL	54	-1
1766	HFHYLYR	1793	7	dev-embryo	0.34777	0	False	EBZ_1793.1_sets_PL.dev-embryo	0.0	1.0	0.0	0.0	0.0	0.0	0.0	1793.1	antisense;	HFHYLYRIISKHSFSWFCHINIVLKTRIWWIKKWFIIIIRLPWVLFSIFIFKVL	54	-1
1767	YVDALSTLSGVTTSGKQR	1800	18	dev-adult.PL	0.0012699000000000002	0	False	EBZ_1800.1_sets_PL	0.0	1.0	0.0	0.0	0.0	0.0	0.0	1800.1	antisense;	YVDALSTLSGVTTSGKQRAATRSGVAHAASIQNLLVLQRYGTVVGNML	48	46
1768	QKQNYELKQVQNR	1801	13	PL	0.20247	0	False	EBZ_1801.1_sets_PL	1.0	0.0	0.0	0.0	0.0	0.0	0.0	1801.1	intergenic;	QKQNYELKQVQNRLDDREAPLIVWAHS	27	-1
1769	QVQNRLDDR	1801	9	dev-embryo.PL	0.012666	0	False	EBZ_1801.1_sets_PL	1.0	0.0	0.0	0.0	0.0	0.0	0.0	1801.1	intergenic;	QKQNYELKQVQNRLDDREAPLIVWAHS	27	-1
1770	IVNFLCTPTFLLK	1804	13	embryo.PL	0.1283	0	False	EBZ_1804.1_sets_PL	1.0	0.0	0.0	0.0	0.0	0.0	0.0	1804.1	intergenic;	KIVNNFQTLSGQNKINTIMAFTASKPELLTTPKIQAQGQVGRTFVFRIVNFLCTPTFLLKATGSIVLKHR	70	18
1771	IVNFLCTPTFLLKATGSIVLK	1804	21	embryo.PL	0.0023674	0	False	EBZ_1804.1_sets_PL	1.0	0.0	0.0	0.0	0.0	0.0	0.0	1804.1	intergenic;	KIVNNFQTLSGQNKINTIMAFTASKPELLTTPKIQAQGQVGRTFVFRIVNFLCTPTFLLKATGSIVLKHR	70	18
1772	PELLTTPK	1804	8	embryo	0.12187	0	False	EBZ_1804.1_sets_PL	1.0	0.0	0.0	0.0	0.0	0.0	0.0	1804.1	intergenic;	KIVNNFQTLSGQNKINTIMAFTASKPELLTTPKIQAQGQVGRTFVFRIVNFLCTPTFLLKATGSIVLKHR	70	18
1773	PELLTTPKIQAQGQVGR	1804	17	PL	0.20937	0	False	EBZ_1804.1_sets_PL	1.0	0.0	0.0	0.0	0.0	0.0	0.0	1804.1	intergenic;	KIVNNFQTLSGQNKINTIMAFTASKPELLTTPKIQAQGQVGRTFVFRIVNFLCTPTFLLKATGSIVLKHR	70	18
1774	QTAFNLLIR	1807	9	embryo	0.13702	0	False	EBZ_1807.1_sets_PL	0.0	0.0	1.0	0.0	1.0	0.0	0.0	1807.1	sense;intronic;	HFHGFLIVKFQFDQEIFQTISYCLPFSILIKHTMYYYKQTAFNLLIRQAKLFFECN	56	33
1775	HFHGFLIVK	1807	9	PL	0.003997	0	False	EBZ_1807.1_sets_PL	0.0	0.0	1.0	0.0	1.0	0.0	0.0	1807.1	sense;intronic;	HFHGFLIVKFQFDQEIFQTISYCLPFSILIKHTMYYYKQTAFNLLIRQAKLFFECN	56	33
1776	TTTLFVAGMAFLDLINFMHSYKK	1808	23	dev-adult.PL	0.0037169	0	False	EBZ_1808.1_sets_PL.dev-adult	0.0	0.0	1.0	0.0	1.0	0.0	0.0	1808.1	sense;intronic;	EPYFSQNLDEKLKTTTLFVAGMAFLDLINFMHSYKKYICS	40	21
1777	DVEANFNR	1811	8	embryo	0.47412	0	False	EBZ_1811.1_sets_PL	0.0	0.0	1.0	0.0	1.0	0.0	0.0	1811.1	sense;intronic;	INEMNFKKSNCLNVFYDTLLFKVDICRDVEANFNRPSLKI	40	3
1778	DVEANFNRPSLKI	1811	13	embryo.PL	0.0038209	0	False	EBZ_1811.1_sets_PL	0.0	0.0	1.0	0.0	1.0	0.0	0.0	1811.1	sense;intronic;	INEMNFKKSNCLNVFYDTLLFKVDICRDVEANFNRPSLKI	40	3
1779	INEMNFK	1811	7	embryo	0.26765	0	False	EBZ_1811.1_sets_PL	0.0	0.0	1.0	0.0	1.0	0.0	0.0	1811.1	sense;intronic;	INEMNFKKSNCLNVFYDTLLFKVDICRDVEANFNRPSLKI	40	3
1780	INEMNFKKSNCLNVFYDTLLFK	1811	22	embryo	0.22712	0	False	EBZ_1811.1_sets_PL	0.0	0.0	1.0	0.0	1.0	0.0	0.0	1811.1	sense;intronic;	INEMNFKKSNCLNVFYDTLLFKVDICRDVEANFNRPSLKI	40	3
1781	KSNCLNVFYDTLLFK	1811	15	embryo	0.22069	0	False	EBZ_1811.1_sets_PL	0.0	0.0	1.0	0.0	1.0	0.0	0.0	1811.1	sense;intronic;	INEMNFKKSNCLNVFYDTLLFKVDICRDVEANFNRPSLKI	40	3
1782	INEMNFKK	1811	8	PL	0.011672	0	False	EBZ_1811.1_sets_PL	0.0	0.0	1.0	0.0	1.0	0.0	0.0	1811.1	sense;intronic;	INEMNFKKSNCLNVFYDTLLFKVDICRDVEANFNRPSLKI	40	3
1783	SNCLNVFYDTLLFKVDICRDVEANFNR	1811	27	PL	0.37713	0	False	EBZ_1811.1_sets_PL	0.0	0.0	1.0	0.0	1.0	0.0	0.0	1811.1	sense;intronic;	INEMNFKKSNCLNVFYDTLLFKVDICRDVEANFNRPSLKI	40	3
1784	VDICRDVEANFNRPSLK	1811	17	PL	0.041116	0	False	EBZ_1811.1_sets_PL	0.0	0.0	1.0	0.0	1.0	0.0	0.0	1811.1	sense;intronic;	INEMNFKKSNCLNVFYDTLLFKVDICRDVEANFNRPSLKI	40	3
1785	IVSRSQMVPETYDLNIR	1812	17	dev-adult.embryo.dev-embryo.PL	0.0014048	0	False	EBZ_1812.1_sets_PL	1.0	0.0	0.0	0.0	0.0	0.0	0.0	1812.1	intergenic;	IVSRSQMVPETYDLNIR	17	6
1786	FNDTVGHFQYGTSNWSLR	1813	18	PL	0.16397	0	False	EBZ_1813.1_sets_PL	14.0	0.0	0.0	0.0	0.0	0.0	0.0	1813.1	intergenic;	LLLLLGINTLGLEVYCKRPQPLLPFISEDCLVDHLAQKRFNDTVGHFQYGTSNWSLRRKTLLDLRLDL	68	-1
1787	FNDTVGHFQYGTSNWSLRRK	1813	20	PL	0.20563	0	False	EBZ_1813.1_sets_PL	14.0	0.0	0.0	0.0	0.0	0.0	0.0	1813.1	intergenic;	LLLLLGINTLGLEVYCKRPQPLLPFISEDCLVDHLAQKRFNDTVGHFQYGTSNWSLRRKTLLDLRLDL	68	-1
1788	LLLLLGINTLGLEVYCK	1813	17	PL	0.00013999	0	False	EBZ_1813.1_sets_PL	14.0	0.0	0.0	0.0	0.0	0.0	0.0	1813.1	intergenic;	LLLLLGINTLGLEVYCKRPQPLLPFISEDCLVDHLAQKRFNDTVGHFQYGTSNWSLRRKTLLDLRLDL	68	-1
1789	RFNDTVGHFQYGTSNWSLR	1813	19	PL	0.14782	0	False	EBZ_1813.1_sets_PL	14.0	0.0	0.0	0.0	0.0	0.0	0.0	1813.1	intergenic;	LLLLLGINTLGLEVYCKRPQPLLPFISEDCLVDHLAQKRFNDTVGHFQYGTSNWSLRRKTLLDLRLDL	68	-1
1790	GCLQRPGESNAAGSIQK	1814	17	PL	0.005356199999999999	0	False	EBZ_1814.1_sets_PL	0.0	0.0	1.0	1.0	1.0	0.0	0.0	1814.1	sense;exonic;intronic;	NFPGPGQSKDPGSILQCDRHSARGCLQRPGESNAAGSIQK	40	-1
1791	LTGTSCVQLR	1815	10	PL	0.0022654	0	False	EBZ_1815.1_sets_PL	0.0	0.0	1.0	0.0	1.0	0.0	0.0	1815.1	sense;intronic;	PYYCTSIFRLHSAGLVQLMHRLTGTSCVQLRGDGGACDL	39	18
1792	SILLSQFFFYEPSVRVR	1817	17	dev-adult.PL	0.00039878	0	False	EBZ_1817.1_sets_PL	0.0	0.0	1.0	0.0	1.0	0.0	0.0	1817.1	sense;intronic;	SILLSQFFFYEPSVRVRCLNPFVCLAYQNGWQS	33	-1
1793	FLFIFYSNVATK	1818	12	PL	0.0016261	0	False	EBZ_1818.1_sets_PL	1.0	0.0	0.0	0.0	0.0	0.0	0.0	1818.1	intergenic;	PHLRLPSAIQLNAFRFLFIFYSNVATKMAQTQRSYLCNSFFFPADILVALEMQ	53	27
1794	LPSAIQLNAFR	1818	11	PL	0.13798	0	False	EBZ_1818.1_sets_PL	1.0	0.0	0.0	0.0	0.0	0.0	0.0	1818.1	intergenic;	PHLRLPSAIQLNAFRFLFIFYSNVATKMAQTQRSYLCNSFFFPADILVALEMQ	53	27
1795	LPSAIQLNAFRFLFIFYSNVATK	1818	23	PL	0.21932	0	False	EBZ_1818.1_sets_PL	1.0	0.0	0.0	0.0	0.0	0.0	0.0	1818.1	intergenic;	PHLRLPSAIQLNAFRFLFIFYSNVATKMAQTQRSYLCNSFFFPADILVALEMQ	53	27
1796	LPSAIQLNAFRFLFIFYSNVATKMAQTQR	1818	29	PL	0.13658	0	False	EBZ_1818.1_sets_PL	1.0	0.0	0.0	0.0	0.0	0.0	0.0	1818.1	intergenic;	PHLRLPSAIQLNAFRFLFIFYSNVATKMAQTQRSYLCNSFFFPADILVALEMQ	53	27
1797	SYLCNSFFFPADILVALEMQ	1818	20	PL	0.16602999999999998	0	False	EBZ_1818.1_sets_PL	1.0	0.0	0.0	0.0	0.0	0.0	0.0	1818.1	intergenic;	PHLRLPSAIQLNAFRFLFIFYSNVATKMAQTQRSYLCNSFFFPADILVALEMQ	53	27
1798	FLFIFYSNVATKMAQTQRSYLCNSFFFPADILVALEMQ	1818	38	dev-embryo	0.15112	0	False	EBZ_1818.1_sets_PL	1.0	0.0	0.0	0.0	0.0	0.0	0.0	1818.1	intergenic;	PHLRLPSAIQLNAFRFLFIFYSNVATKMAQTQRSYLCNSFFFPADILVALEMQ	53	27
1799	ISLLLAELTFLCMVNAGPK	1821	19	dev-adult.embryo.dev-embryo.PL	9.993e-06	0	False	EBZ_1821.1_sets_PL	1.0	0.0	0.0	0.0	0.0	0.0	0.0	1821.1	intergenic;	ISLLLAELTFLCMVNAGPKRR	21	12
1800	HIAFTPFGPR	1823	10	embryo	0.43894	0	False	EBZ_1823.1_sets_PL	0.0	0.0	1.0	0.0	1.0	0.0	0.0	1823.1	sense;intronic;	IRFLFIFKKNIRILSSHFTIAIMSASAFETFSMWQAYHANFLDIACAGPRLSIFFLDPRHIAFTPFGPRTRPRPLMRYAPGDAVCQSLKMELQSSC	96	22
1801	HIAFTPFGPRTRPR	1823	14	embryo	0.34951	0	False	EBZ_1823.1_sets_PL	0.0	0.0	1.0	0.0	1.0	0.0	0.0	1823.1	sense;intronic;	IRFLFIFKKNIRILSSHFTIAIMSASAFETFSMWQAYHANFLDIACAGPRLSIFFLDPRHIAFTPFGPRTRPRPLMRYAPGDAVCQSLKMELQSSC	96	22
1802	LSIFFLDPRHIAFTPFGPR	1823	19	embryo.PL	0.18053	0	False	EBZ_1823.1_sets_PL	0.0	0.0	1.0	0.0	1.0	0.0	0.0	1823.1	sense;intronic;	IRFLFIFKKNIRILSSHFTIAIMSASAFETFSMWQAYHANFLDIACAGPRLSIFFLDPRHIAFTPFGPRTRPRPLMRYAPGDAVCQSLKMELQSSC	96	22
1803	LSIFFLDPRHIAFTPFGPRTR	1823	21	embryo	0.36337	0	False	EBZ_1823.1_sets_PL	0.0	0.0	1.0	0.0	1.0	0.0	0.0	1823.1	sense;intronic;	IRFLFIFKKNIRILSSHFTIAIMSASAFETFSMWQAYHANFLDIACAGPRLSIFFLDPRHIAFTPFGPRTRPRPLMRYAPGDAVCQSLKMELQSSC	96	22
1804	PLMRYAPGDAVCQSLKMELQSSC	1823	23	embryo	0.17364000000000002	0	False	EBZ_1823.1_sets_PL	0.0	0.0	1.0	0.0	1.0	0.0	0.0	1823.1	sense;intronic;	IRFLFIFKKNIRILSSHFTIAIMSASAFETFSMWQAYHANFLDIACAGPRLSIFFLDPRHIAFTPFGPRTRPRPLMRYAPGDAVCQSLKMELQSSC	96	22
1805	PRPLMRYAPGDAVCQSLK	1823	18	embryo.PL	0.0075545	0	False	EBZ_1823.1_sets_PL	0.0	0.0	1.0	0.0	1.0	0.0	0.0	1823.1	sense;intronic;	IRFLFIFKKNIRILSSHFTIAIMSASAFETFSMWQAYHANFLDIACAGPRLSIFFLDPRHIAFTPFGPRTRPRPLMRYAPGDAVCQSLKMELQSSC	96	22
1806	LSIFFLDPR	1823	9	PL	0.015602	0	False	EBZ_1823.1_sets_PL	0.0	0.0	1.0	0.0	1.0	0.0	0.0	1823.1	sense;intronic;	IRFLFIFKKNIRILSSHFTIAIMSASAFETFSMWQAYHANFLDIACAGPRLSIFFLDPRHIAFTPFGPRTRPRPLMRYAPGDAVCQSLKMELQSSC	96	22
1807	AHIETLLQK	1824	9	dev-adult.PL	0.0014111	0	False	EBZ_1824.1_sets_PL	0.0	1.0	0.0	0.0	0.0	0.0	0.0	1824.1	antisense;	SDRAHIETLLQKGTRGNKLHILSGSSVFVLYLLDQGALINMV	42	40
1808	AHIETLLQKGTR	1824	12	PL	0.19903	0	False	EBZ_1824.1_sets_PL	0.0	1.0	0.0	0.0	0.0	0.0	0.0	1824.1	antisense;	SDRAHIETLLQKGTRGNKLHILSGSSVFVLYLLDQGALINMV	42	40
1809	HLNGISDRHGTPR	1828	13	PL	0.99115	0	False	EBZ_1828.1_sets_PL	0.0	1.0	0.0	0.0	0.0	0.0	0.0	1828.1	antisense;	YNITSVSLSLSPLRRHLNGISDRHGTPRRSWNSSLPSESPECPGRS	46	-1
1810	RSWNSSLPSESPECPGR	1828	17	PL	0.002465	0	False	EBZ_1828.1_sets_PL	0.0	1.0	0.0	0.0	0.0	0.0	0.0	1828.1	antisense;	YNITSVSLSLSPLRRHLNGISDRHGTPRRSWNSSLPSESPECPGRS	46	-1
1811	LTLTERDGSVVFIFYR	1829	16	dev-adult.embryo.dev-embryo.PL	0.0010125	0	False	EBZ_1829.1_sets_PL	0.0	1.0	0.0	0.0	0.0	0.0	0.0	1829.1	antisense;	LRKRDRLTLTERDGSVVFIFYRF	23	-1
1812	DGSVVFIFYR	1829	10	PL	0.4659100000000001	0	False	EBZ_1829.1_sets_PL	0.0	1.0	0.0	0.0	0.0	0.0	0.0	1829.1	antisense;	LRKRDRLTLTERDGSVVFIFYRF	23	-1
1813	MSAPTTAKGIHSMKQPAMK	1833	19	dev-embryo.PL	0.0050286	0	False	EBZ_1833.1_sets_PL.dev-embryo	1.0	0.0	0.0	0.0	0.0	0.0	0.0	1833.1	intergenic;	MSAPTTAKGIHSMKQPAMKQTMPERQLLKVVKKGLRDGRYLYTRWICSL	49	0
1814	SAPTTAK	1833	7	dev-embryo.PL	0.25826	0	False	EBZ_1833.1_sets_PL.dev-embryo	1.0	0.0	0.0	0.0	0.0	0.0	0.0	1833.1	intergenic;	MSAPTTAKGIHSMKQPAMKQTMPERQLLKVVKKGLRDGRYLYTRWICSL	49	0
1815	DGRYLYTR	1833	8	dev-embryo	0.43427	0	False	EBZ_1833.1_sets_PL.dev-embryo	1.0	0.0	0.0	0.0	0.0	0.0	0.0	1833.1	intergenic;	MSAPTTAKGIHSMKQPAMKQTMPERQLLKVVKKGLRDGRYLYTRWICSL	49	0
1816	LQIGQMMVLCSHIK	1838	14	dev-adult.embryo.PL	0.0076806	0	False	EBZ_1838.1_sets_PL	1.0	0.0	0.0	0.0	0.0	0.0	0.0	1838.1	intergenic;	MLQIGQMMVLCSHIKLI	17	0
1817	MLQIGQMMVLCSHIK	1838	15	PL	0.29234	0	False	EBZ_1838.1_sets_PL	1.0	0.0	0.0	0.0	0.0	0.0	0.0	1838.1	intergenic;	MLQIGQMMVLCSHIKLI	17	0
1818	CVDSTRMQGCDPLPRFTEFLILMEFR	1840	26	PL	0.13047	0	False	EBZ_1840.1_sets_PL	0.0	0.0	1.0	0.0	1.0	0.0	0.0	1840.1	sense;intronic;	RCVDSTRMQGCDPLPRFTEFLILMEFRMVENRMLYASLKNISTRSSALFWLWQIENEFQLVGCPH	65	7
1819	FTEFLILMEFRMVENR	1840	16	PL	0.192	0	False	EBZ_1840.1_sets_PL	0.0	0.0	1.0	0.0	1.0	0.0	0.0	1840.1	sense;intronic;	RCVDSTRMQGCDPLPRFTEFLILMEFRMVENRMLYASLKNISTRSSALFWLWQIENEFQLVGCPH	65	7
1820	MVENRMLYASLK	1840	12	PL	0.0021886	0	False	EBZ_1840.1_sets_PL	0.0	0.0	1.0	0.0	1.0	0.0	0.0	1840.1	sense;intronic;	RCVDSTRMQGCDPLPRFTEFLILMEFRMVENRMLYASLKNISTRSSALFWLWQIENEFQLVGCPH	65	7
1821	RCVDSTRMQGCDPLPR	1840	16	PL	0.20222	0	False	EBZ_1840.1_sets_PL	0.0	0.0	1.0	0.0	1.0	0.0	0.0	1840.1	sense;intronic;	RCVDSTRMQGCDPLPRFTEFLILMEFRMVENRMLYASLKNISTRSSALFWLWQIENEFQLVGCPH	65	7
1822	LVTEKHRYAR	1841	10	dev-adult.PL	0.0036754	0	False	EBZ_1841.1_sets_PL	0.0	1.0	0.0	0.0	0.0	0.0	0.0	1841.1	antisense;	LRGGGSGQQRGAPATEVIRKLVTEKHRYARRIGSNFKRCRKVGNTKTRFFIAYF	54	-1
1823	LLPIISPADK	1848	10	dev-adult.dev-embryo.PL	0.17194	0	False	EBZ_1848.1_sets_PL	0.0	0.0	1.0	0.0	1.0	0.0	0.0	1848.1	sense;intronic;	LLPIISPADKNSKWDGCETDSASKLKHY	28	-1
1824	LLPIISPADKNSK	1848	13	dev-adult.PL	0.00021261	0	False	EBZ_1848.1_sets_PL	0.0	0.0	1.0	0.0	1.0	0.0	0.0	1848.1	sense;intronic;	LLPIISPADKNSKWDGCETDSASKLKHY	28	-1
1825	LLCPMTLLVK	1852	10	embryo.dev-embryo.PL	0.00032271	0	False	EBZ_1852.1_sets_PL	0.0	0.0	1.0	1.0	0.0	0.0	0.0	1852.1	sense;exonic;	SMMSLTQQEPHTPPRCTTRSSASGLLWTRSRSLIRKLLCPMTLLVKSRKIIPMLQT	56	1
1826	LLCPMTLLVKSR	1852	12	dev-adult.embryo.PL	0.18224	0	False	EBZ_1852.1_sets_PL	0.0	0.0	1.0	1.0	0.0	0.0	0.0	1852.1	sense;exonic;	SMMSLTQQEPHTPPRCTTRSSASGLLWTRSRSLIRKLLCPMTLLVKSRKIIPMLQT	56	1
1827	SMMSLTQQEPHTPPR	1852	15	PL	0.49614	0	False	EBZ_1852.1_sets_PL	0.0	0.0	1.0	1.0	0.0	0.0	0.0	1852.1	sense;exonic;	SMMSLTQQEPHTPPRCTTRSSASGLLWTRSRSLIRKLLCPMTLLVKSRKIIPMLQT	56	1
1828	GSAVFRWELPETWTHTIMLHLNELYVS	1854	27	PL	0.21834	0	False	EBZ_1854.1_sets_PL	1.0	0.0	0.0	0.0	0.0	0.0	0.0	1854.1	intergenic;	YGGGGQRSGILSELHLNSLPVIAIDMCSRWQLYHPHPPWIHCPIPRGSAVFRWELPETWTHTIMLHLNELYVS	73	25
1829	SGILSELHLNSLPVIAIDMCSR	1854	22	dev-adult.PL	0.0039216	0	False	EBZ_1854.1_sets_PL	1.0	0.0	0.0	0.0	0.0	0.0	0.0	1854.1	intergenic;	YGGGGQRSGILSELHLNSLPVIAIDMCSRWQLYHPHPPWIHCPIPRGSAVFRWELPETWTHTIMLHLNELYVS	73	25
1830	YGGGGQR	1854	7	dev-adult.PL	0.43275	0	False	EBZ_1854.1_sets_PL	1.0	0.0	0.0	0.0	0.0	0.0	0.0	1854.1	intergenic;	YGGGGQRSGILSELHLNSLPVIAIDMCSRWQLYHPHPPWIHCPIPRGSAVFRWELPETWTHTIMLHLNELYVS	73	25
1832	LFPISVGGLK	1857	10	PL	0.41582	0	False	EBZ_1857.1_sets_PL	0.0	1.0	0.0	0.0	0.0	0.0	0.0	1857.1	antisense;	LFPISVGGLKSMQFSKLRTVGIVSLSRLASALVPILLHANQFSHIGFCASVWATNTRASKLNTSVTFISFIGSLICVLSTKRLKIKLS	88	11
1834	LFPISVGGLKSMQFSKLR	1857	18	PL	0.0015517	0	False	EBZ_1857.1_sets_PL	0.0	1.0	0.0	0.0	0.0	0.0	0.0	1857.1	antisense;	LFPISVGGLKSMQFSKLRTVGIVSLSRLASALVPILLHANQFSHIGFCASVWATNTRASKLNTSVTFISFIGSLICVLSTKRLKIKLS	88	11
1835	AQGMNVCVCIKSTEKNHTR	1871	19	PL	0.38732	0	False	EBZ_1871.1_sets_PL	0.0	1.0	0.0	0.0	0.0	0.0	0.0	1871.1	antisense;	SKAQGMNVCVCIKSTEKNHTRAQEITADI	29	5
1836	STEKNHTR	1871	8	dev-adult.PL	0.0046886	0	False	EBZ_1871.1_sets_PL	0.0	1.0	0.0	0.0	0.0	0.0	0.0	1871.1	antisense;	SKAQGMNVCVCIKSTEKNHTRAQEITADI	29	5
1837	SKAQGMNVCVCIKSTEK	1871	17	dev-adult	0.10675	0	False	EBZ_1871.1_sets_PL	0.0	1.0	0.0	0.0	0.0	0.0	0.0	1871.1	antisense;	SKAQGMNVCVCIKSTEKNHTRAQEITADI	29	5
1838	LDGFNLNIK	1872	9	PL	9.1931e-05	0	False	EBZ_1872.1_sets_PL	0.0	1.0	0.0	0.0	0.0	0.0	0.0	1872.1	antisense;	LDGFNLNIKAKSKLKCPRTHTHIYISLSIYTLVESEPHHTQLHIYVAMNRGGMFHIFWEFLSVS	64	47
1839	SEAETYMHIHCGANPENITELHS	1874	23	dev-adult.PL	0.010646	0	False	EBZ_1874.1_sets_PL	1.0	0.0	0.0	0.0	0.0	0.0	0.0	1874.1	intergenic;	SEAETYMHIHCGANPENITELHS	23	6
1840	TELSKLLCECK	1881	11	embryo.PL	0.0045386	0	False	EBZ_1881.1_sets_PL	1.0	0.0	0.0	0.0	0.0	0.0	0.0	1881.1	intergenic;	IVLISFNRQFLISNPLMCKTELSKLLCECKLLGA	34	16
1842	FSVSLIRNAYQR	1882	12	embryo	0.1998	0	False	EBZ_1882.1_sets_PL	0.0	0.0	1.0	1.0	1.0	0.0	0.0	1882.1	sense;exonic;intronic;	RSYAVPLDSFTASPSVNVCLVAFSLHMITWITPISVLNFPLSLWWIVRRFLVLHKHRDSICIPSIAPSMSGAGISRPSLRVVHRGKFSVSLIRNAYQRSSVKDRQIMSNI	110	26
1844	NAYQRSSVK	1882	9	embryo.PL	0.004563899999999999	0	False	EBZ_1882.1_sets_PL	0.0	0.0	1.0	1.0	1.0	0.0	0.0	1882.1	sense;exonic;intronic;	RSYAVPLDSFTASPSVNVCLVAFSLHMITWITPISVLNFPLSLWWIVRRFLVLHKHRDSICIPSIAPSMSGAGISRPSLRVVHRGKFSVSLIRNAYQRSSVKDRQIMSNI	110	26
1846	VVHRGKFSVSLIR	1882	13	embryo	0.40188	0	False	EBZ_1882.1_sets_PL	0.0	0.0	1.0	1.0	1.0	0.0	0.0	1882.1	sense;exonic;intronic;	RSYAVPLDSFTASPSVNVCLVAFSLHMITWITPISVLNFPLSLWWIVRRFLVLHKHRDSICIPSIAPSMSGAGISRPSLRVVHRGKFSVSLIRNAYQRSSVKDRQIMSNI	110	26
1848	FSVSLIR	1882	7	PL	0.43928	0	False	EBZ_1882.1_sets_PL	0.0	0.0	1.0	1.0	1.0	0.0	0.0	1882.1	sense;exonic;intronic;	RSYAVPLDSFTASPSVNVCLVAFSLHMITWITPISVLNFPLSLWWIVRRFLVLHKHRDSICIPSIAPSMSGAGISRPSLRVVHRGKFSVSLIRNAYQRSSVKDRQIMSNI	110	26
1849	ITNINLNYVK	1883	10	dev-adult.embryo.dev-embryo.PL	0.00024582	0	False	EBZ_1883.1_sets_PL.dev-adult	1.0	0.0	0.0	0.0	0.0	0.0	0.0	1883.1	intergenic;	ITNINLNYVKQYTNSRTLAMTFII	24	19
1850	AEWGYKYYYR	1884	10	embryo.PL	0.19715	0	False	EBZ_1884.1_sets_PL	1.0	0.0	0.0	0.0	0.0	0.0	0.0	1884.1	intergenic;	IAGRLILIFNINSRAEWGYKYYYR	24	-1
1851	LILIFNINSR	1884	10	dev-adult.embryo.PL	0.0024704	0	False	EBZ_1884.1_sets_PL	1.0	0.0	0.0	0.0	0.0	0.0	0.0	1884.1	intergenic;	IAGRLILIFNINSRAEWGYKYYYR	24	-1
1852	LILIFNINSRAEWGYKYYYR	1884	20	PL	0.15137	0	False	EBZ_1884.1_sets_PL	1.0	0.0	0.0	0.0	0.0	0.0	0.0	1884.1	intergenic;	IAGRLILIFNINSRAEWGYKYYYR	24	-1
1853	IAGRLILIFNINSR	1884	14	dev-embryo	0.081326	0	False	EBZ_1884.1_sets_PL	1.0	0.0	0.0	0.0	0.0	0.0	0.0	1884.1	intergenic;	IAGRLILIFNINSRAEWGYKYYYR	24	-1
1854	ILMRPVSVLWLLIECVIEPTA	1887	21	PL	0.0035582	0	False	EBZ_1887.1_sets_PL	0.0	1.0	0.0	0.0	0.0	0.0	0.0	1887.1	antisense;	ILMRPVSVLWLLIECVIEPTA	21	2
1855	PVSVLWLLIECVIEPTA	1887	17	PL	0.519	0	False	EBZ_1887.1_sets_PL	0.0	1.0	0.0	0.0	0.0	0.0	0.0	1887.1	antisense;	ILMRPVSVLWLLIECVIEPTA	21	2
1856	LHSSTAPSDLR	1888	11	embryo.dev-embryo.PL	0.0042644	0	False	EBZ_1888.1_sets_PL	1.0	0.0	0.0	0.0	0.0	0.0	0.0	1888.1	intergenic;	TQPNRSTKTKLHSSTAPSDLRLTADARTQSVD	32	-1
1857	TKLHSSTAPSDLRLTADAR	1888	19	dev-embryo	0.15077000000000002	0	False	EBZ_1888.1_sets_PL	1.0	0.0	0.0	0.0	0.0	0.0	0.0	1888.1	intergenic;	TQPNRSTKTKLHSSTAPSDLRLTADARTQSVD	32	-1
1858	FAGPLYL	1896	7	PL	0.52251	0	False	EBZ_1896.1_sets_PL	0.0	0.0	1.0	1.0	0.0	0.0	0.0	1896.1	sense;exonic;	RVGGRSGALTLGDAKQGRICHRKYFWRRRFAGPLYL	36	-1
1859	SGALTLGDAK	1896	10	PL	0.0014569	0	False	EBZ_1896.1_sets_PL	0.0	0.0	1.0	1.0	0.0	0.0	0.0	1896.1	sense;exonic;	RVGGRSGALTLGDAKQGRICHRKYFWRRRFAGPLYL	36	-1
1860	AICMLACLIK	1899	10	PL	0.0058103	0	False	EBZ_1899.1_sets_PL	0.0	1.0	0.0	0.0	0.0	0.0	0.0	1899.1	antisense;	NWKLAVRAICMLACLIK	17	10
1861	ESIRIVSTLSFAFIHSMIAHR	1901	21	PL	0.20386	0	False	EBZ_1901.1_sets_PL	0.0	0.0	1.0	0.0	1.0	1.0	0.0	1901.1	sense;intronic;fiveUTR;	NLCVHTSASKSVCVCFCLLFQLNKLRQSSPVEKESHRESIRIVSTLSFAFIHSMIAHRSPLEFN	64	53
1862	IVSTLSFAFIHSMIAHR	1901	17	PL	0.00051087	0	False	EBZ_1901.1_sets_PL	0.0	0.0	1.0	0.0	1.0	1.0	0.0	1901.1	sense;intronic;fiveUTR;	NLCVHTSASKSVCVCFCLLFQLNKLRQSSPVEKESHRESIRIVSTLSFAFIHSMIAHRSPLEFN	64	53
1863	NLCVHTSASKSVCVCFCLLFQLNK	1901	24	PL	0.22114	0	False	EBZ_1901.1_sets_PL	0.0	0.0	1.0	0.0	1.0	1.0	0.0	1901.1	sense;intronic;fiveUTR;	NLCVHTSASKSVCVCFCLLFQLNKLRQSSPVEKESHRESIRIVSTLSFAFIHSMIAHRSPLEFN	64	53
1864	QSSPVEKESHRESIR	1901	15	PL	2.9581	0	False	EBZ_1901.1_sets_PL	0.0	0.0	1.0	0.0	1.0	1.0	0.0	1901.1	sense;intronic;fiveUTR;	NLCVHTSASKSVCVCFCLLFQLNKLRQSSPVEKESHRESIRIVSTLSFAFIHSMIAHRSPLEFN	64	53
1865	SVCVCFCLLFQLNK	1901	14	PL	0.15993	0	False	EBZ_1901.1_sets_PL	0.0	0.0	1.0	0.0	1.0	1.0	0.0	1901.1	sense;intronic;fiveUTR;	NLCVHTSASKSVCVCFCLLFQLNKLRQSSPVEKESHRESIRIVSTLSFAFIHSMIAHRSPLEFN	64	53
1866	EDNTGYTYMYIK	1905	12	PL	0.47984	0	False	EBZ_1905.1_sets_PL	1.0	0.0	0.0	0.0	0.0	0.0	0.0	1905.1	intergenic;	TCKREDNTGYTYMYIKSQSLYLVFDDNEDRLRNIAKTCATDCRKNGLLAIEI	52	12
1867	TCKREDNTGYTYMYIK	1905	16	PL	0.0035515	0	False	EBZ_1905.1_sets_PL	1.0	0.0	0.0	0.0	0.0	0.0	0.0	1905.1	intergenic;	TCKREDNTGYTYMYIKSQSLYLVFDDNEDRLRNIAKTCATDCRKNGLLAIEI	52	12
1868	FLSTRPTEILSMHR	1906	14	PL	0.014144	0	False	EBZ_1906.1_sets_PL	0.0	1.0	0.0	0.0	0.0	0.0	0.0	1906.1	antisense;	FLSTRPTEILSMHRLLLDQ	19	11
1869	LATLDVR	1907	7	embryo.dev-embryo.dev-adult	0.029252	0	False	EBZ_1907.1_sets_PL	0.0	1.0	0.0	0.0	0.0	0.0	0.0	1907.1	antisense;	LATLDVRTNCHGNGHVKYSQDEVFPLLWALNAYGMFGWS	39	34
1870	LATLDVRTNCHGNGHVK	1907	17	dev-adult.embryo.dev-embryo.PL	0.0023851	0	False	EBZ_1907.1_sets_PL	0.0	1.0	0.0	0.0	0.0	0.0	0.0	1907.1	antisense;	LATLDVRTNCHGNGHVKYSQDEVFPLLWALNAYGMFGWS	39	34
1871	IFSSLCDQR	1911	9	dev-adult.embryo.PL	0.0049165	0	False	EBZ_1911.1_sets_PL	1.0	0.0	0.0	0.0	0.0	0.0	0.0	1911.1	intergenic;	IFSSLCDQRESDLINLLQVLA	21	-1
1872	IFSSLCDQRESDLINLLQVLA	1911	21	dev-adult	0.21728000000000006	0	False	EBZ_1911.1_sets_PL	1.0	0.0	0.0	0.0	0.0	0.0	0.0	1911.1	intergenic;	IFSSLCDQRESDLINLLQVLA	21	-1
1873	FHSEALLR	1920	8	embryo.PL	0.0016922	0	False	EBZ_1920.1_sets_PL	1.0	0.0	0.0	0.0	0.0	0.0	0.0	1920.1	intergenic;	FHSEALLRDSKKKYEFKFIINLKLVVSP	28	-1
1874	FHSEALLRDSK	1920	11	PL	0.62732	0	False	EBZ_1920.1_sets_PL	1.0	0.0	0.0	0.0	0.0	0.0	0.0	1920.1	intergenic;	FHSEALLRDSKKKYEFKFIINLKLVVSP	28	-1
1875	FIINLKLVVSP	1920	11	PL	0.18495	0	False	EBZ_1920.1_sets_PL	1.0	0.0	0.0	0.0	0.0	0.0	0.0	1920.1	intergenic;	FHSEALLRDSKKKYEFKFIINLKLVVSP	28	-1
1876	CRNVFTNKTMHTK	1925	13	PL	0.33013000000000003	0	False	EBZ_1925.1_sets_PL	0.0	0.0	1.0	0.0	0.0	0.0	1.0	1925.1	sense;threeUTR;	KKTFSKCRNVFTNKTMHTKREHFVLLLKFNF	31	15
1877	REHFVLLLK	1925	9	dev-adult.dev-embryo.PL	0.0016658	0	False	EBZ_1925.1_sets_PL	0.0	0.0	1.0	0.0	0.0	0.0	1.0	1925.1	sense;threeUTR;	KKTFSKCRNVFTNKTMHTKREHFVLLLKFNF	31	15
1878	CRNVFTNK	1925	8	dev-embryo	0.79264	0	False	EBZ_1925.1_sets_PL	0.0	0.0	1.0	0.0	0.0	0.0	1.0	1925.1	sense;threeUTR;	KKTFSKCRNVFTNKTMHTKREHFVLLLKFNF	31	15
1879	FQISLSAVTTSHPFQNLGIAR	1927	21	embryo	0.15675999999999998	0	False	EBZ_1927.1_sets_PL	0.0	1.0	0.0	0.0	0.0	0.0	0.0	1927.1	antisense;	LCSSLSENLDHALQSLILHVYGHIIFVAPMGSGLFSHAVGEQVGHVVLHLLDKRYSVLELLFRFTAKAADKIAGQPHVGQKLSDVLHKFQISLSAVTTSHPFQNLGIARLCWQVKLLAHIRVISDDLQNFVGEILRMRRGETDAHVWNSLSHGSEQCCKGSPACFGLVNSAKTGHWSCFQ	180	29
1880	GSPACFGLVNSAK	1927	13	embryo	0.12273	0	False	EBZ_1927.1_sets_PL	0.0	1.0	0.0	0.0	0.0	0.0	0.0	1927.1	antisense;	LCSSLSENLDHALQSLILHVYGHIIFVAPMGSGLFSHAVGEQVGHVVLHLLDKRYSVLELLFRFTAKAADKIAGQPHVGQKLSDVLHKFQISLSAVTTSHPFQNLGIARLCWQVKLLAHIRVISDDLQNFVGEILRMRRGETDAHVWNSLSHGSEQCCKGSPACFGLVNSAKTGHWSCFQ	180	29
1881	IAGQPHVGQK	1927	10	embryo	0.11163	0	False	EBZ_1927.1_sets_PL	0.0	1.0	0.0	0.0	0.0	0.0	0.0	1927.1	antisense;	LCSSLSENLDHALQSLILHVYGHIIFVAPMGSGLFSHAVGEQVGHVVLHLLDKRYSVLELLFRFTAKAADKIAGQPHVGQKLSDVLHKFQISLSAVTTSHPFQNLGIARLCWQVKLLAHIRVISDDLQNFVGEILRMRRGETDAHVWNSLSHGSEQCCKGSPACFGLVNSAKTGHWSCFQ	180	29
1882	LLAHIRVISDDLQNFVGEILR	1927	21	embryo	0.22545	0	False	EBZ_1927.1_sets_PL	0.0	1.0	0.0	0.0	0.0	0.0	0.0	1927.1	antisense;	LCSSLSENLDHALQSLILHVYGHIIFVAPMGSGLFSHAVGEQVGHVVLHLLDKRYSVLELLFRFTAKAADKIAGQPHVGQKLSDVLHKFQISLSAVTTSHPFQNLGIARLCWQVKLLAHIRVISDDLQNFVGEILRMRRGETDAHVWNSLSHGSEQCCKGSPACFGLVNSAKTGHWSCFQ	180	29
[truncated: 1,438 more rows]
