# Supplementary material for: Protein evidence of unannotated ORFs in Drosophila reveals unappreciated diversity in the evolution of young proteins
Source: bioRxiv preprint, doi:10.1101/2022.04.04.486978, version 2 (2022-08-08)
Supplement: Figure 7 - Source Data File 1 [file 486978_file06.xlsx]

## Sheet: all data
			D-mel-embryos-DDA,PRM_re-search-custom DB
Accession	Description	Score	Area	# PSMs	Coverage	# Proteins	# Unique Peptides	# Peptides	# AAs	MW [kDa]	calc. pI
X2JB25	Yolk protein 2, isoform B OS=Drosophila melanogaster OX=7227 GN=Yp2 PE=1 SV=1 - [X2JB25_DROME]	19649.4	1.19648e+11	510	74.89	1	32	34	442	49.63	7.95752
	A2	Sequence	# PSMs	# Proteins	# Protein Groups	Protein Group Accessions	Modifications	ΔCn	Area	q-Value	PEP	IonScore	Exp Value	Charge	MH+ [Da]	ΔM [ppm]	m/z [Da]	RT [min]	# Missed Cleavages
	High	KLQEMSLEEGATLLDK	26	1	1	X2JB25		0	11560304032	0	2.078e-11	155.23	6.22326e-15	2	1804.93	-1.2775	902.971	79.5563	1
	High	SNSLDNVEQPSNWVNPR	13	1	1	X2JB25		0	35576478762	0	4.056e-10	139.94	1.00377e-13	2	1955.92	-1.35739	978.463	39.6268	0
	High	KLQEmSLEEGATLLDK	7	1	1	X2JB25	M5(Oxidation)	0	6.62841e+08	0	2.532e-14	134.75	7.31899e-13	2	1820.93	0.1855	910.969	35.1606	1
	High	TGDLIVIQLGNAIEDFEQYATLNIER	52	1	1	X2JB25		0	1.71548e+09	0	6.21e-14	124.03	6.38517e-12	3	2935.51	2.32347	979.175	70.6587	0
	High	LANVDFFPNGPSTGVPGADNVVEATMR	12	1	1	X2JB25		0	2.32887e+10	0	5.284e-13	118.66	2.01494e-11	2	2775.34	-0.155538	1388.17	115.238	0
	High	GDADFVDAIHTSAYGMGTSQR	11	1	1	X2JB25		0	1.84501e+10	0	3.345e-16	108.88	4.46498e-11	2	2198.97	-1.05512	1099.99	80.9793	0
	High	LQEmSLEEGATLLDK	2	1	1	X2JB25	M4(Oxidation)	0	132555117	0	4.309e-09	98.6	1.91873e-09	2	1692.83	-0.810418	846.921	78.1964	0
	High	LANVDFFPNGPSTGVPGADNVVEATmR	3	1	1	X2JB25	M26(Oxidation)	0	783366624	0	4.269e-13	96.57	3.62381e-09	2	2791.34	1.75452	1396.17	107.099	0
	High	LQEMSLEEGATLLDK	9	1	1	X2JB25		0	1515501720	0	6.181e-09	94.87	5.34372e-09	2	1676.84	-0.210747	838.924	45.8833	0
	High	GQKIEFNLNTLVEK	3	1	1	X2JB25		0	372960528	0	2.356e-08	94.43	4.4892e-09	3	1632.9	0.0635499	544.97	40.289	1
	High	RGYMGIATDFDLQGDYILQVNSK	61	1	1	X2JB25		0	818524745	0	1.401e-11	92.9	9.10329e-09	3	2604.28	2.4958	868.766	66.4965	1
	High	FGDDEVTIFIQGLPETNTQVQK	9	1	1	X2JB25		0	1.0641e+10	0	7.204e-10	91.97	9.0217e-09	3	2479.24	1.54343	827.085	56.7579	0
	High	RSNSLDNVEQPSNWVNPR	8	1	1	X2JB25		0	19004444908	0	1.016e-07	90.58	1.11998e-08	3	2112.02	0.0731401	704.679	34.2766	1
	High	LYHLSQFNHVFKPDYTPEPSQIR	11	1	1	X2JB25		0	47821815912	0	1.677e-14	89.92	1.63993e-08	2	2816.41	-1.2052	1408.71	74.3065	1
	High	IEFNLNTLVEK	65	1	1	X2JB25		0	57766917720	0	4.065e-06	88.51	1.95891e-08	2	1319.72	0.575709	660.364	95.1274	0
	High	QTGYHQVHQPWR	10	1	1	X2JB25		0	21708062216	0	4.13e-08	84.1	4.70745e-08	2	1536.75	2.08461	768.878	18.9512	0
	High	NFPSVAASSYQEYK	41	1	1	X2JB25		0	55354358744	0	4.705e-08	80.5	7.39738e-08	2	1590.74	-0.335554	795.875	36.1679	0
	High	LVELTNTVNVPQEIIHLIGSGPAAHVAGVAGR	32	1	1	X2JB25		0	164515929728	0	6.457e-12	79.57	7.0109e-08	3	3232.78	0.986482	1078.27	121.676	0
	High	LTGLARGDADFVDAIHTSAYGMGTSQR	51	1	1	X2JB25		0	2703528134	0	1.432e-12	72.62	6.75565e-07	3	2810.35	0.370992	937.456	42.4355	1
	High	ITALDPTK	4	1	1	X2JB25		0	31098577696	0	0.002071	69.35	1.45181e-06	2	858.494	0.56798	429.75	25.2077	0
	High	LGEIIGNRLVELTNTVNVPQEIIHLIGSGPAAHVAGVAGR	1	1	1	X2JB25		0	2.2504e+08	0	8.38e-14	65.32	2.93765e-07	4	4085.27	0.974384	1022.07	129.786	1
	High	GDADFVDAIHTSAYGmGTSQR	5	1	1	X2JB25	M16(Oxidation)	0	404429472	0	6.448e-12	63.42	1.06922e-06	3	2214.97	0.553275	738.996	71.2109	0
	High	LGEIIGNR	5	1	1	X2JB25		0	35545464928	0	0.006987	61.08	6.00469e-06	2	871.5	0.326137	436.254	26.5557	0
	High	LVQAYQQR	5	1	1	X2JB25		0	21322146160	0	0.002308	58.84	2.07028e-05	2	1005.55	0.873367	503.278	18.9803	0
	High	KLVQAYQQR	4	1	1	X2JB25		0	5.6352e+08	0	2.317e-05	58.16	1.9171e-05	2	1133.64	-0.301495	567.325	16.1825	1
	High	ATRYFAESVRPGNER	6	2	2	X2JB25;X2JD55		0	5115631337	0	1.035e-05	53.61	5.92296e-05	2	1752.88	-1.01502	876.942	21.38	2
	High	YFAESVRPGNER	22	2	2	X2JB25;X2JD55		0	136274283264	0	7.642e-05	45.14	0.000347533	2	1424.69	0.555335	712.85	23.0109	1
	High	RITALDPTK	7	1	1	X2JB25		0	1795424908	0	0.003961	43.87	0.000615306	2	1014.59	0.0143703	507.801	21.0643	1
	High	IYGKPEER	7	1	1	X2JB25		0	8101355030	0	0.007178	41.69	0.000965639	2	991.52	-0.515435	496.264	13.1252	1
	High	LANVDFFPNGPSTGVPGADNVVEATMRATR	1	1	1	X2JB25		0	0	0	2.019e-09	39.61	0.00235201	3	3103.54	2.82397	1035.18	111.302	1
	High	GYIVGERGQK	2	1	1	X2JB25		0	214041156	0	0.0001415	39.5	0.00152595	2	1106.6	-0.0622246	553.801	16.6315	1
	High	EVEELPNLK	5	1	1	X2JB25		0	58155282404	0	0.0004293	39.44	0.00156993	2	1070.57	0.618946	535.79	32.4989	0
	High	QQKFGDDEVTIFIQGLPETNTQVQK	1	1	1	X2JB25		0	0	0	3.027e-07	22.51	0.0726557	3	2863.46	4.05321	955.158	99.7573	1
	High	LYHLSQFNHVFKPDYTPEPSQIRGYIVGER	3	1	1	X2JB25		0	2495242120	0	1.657e-11	20.34	0.118824	4	3590.82	0.201902	898.46	86.5625	2
	High	QTGYHQVHQPWRQSSSNQGSR	1	1	1	X2JB25		0	2.8442e+06	0	1.374e-05	17.52	0.152229	3	2468.15	-0.847736	823.39	23.7246	1
	High	SNSLDNVEQPSNWVNPREVEELPNLK	1	1	1	X2JB25		0	53781308	0	2.542e-09	15.08	0.538641	3	3007.48	1.61685	1003.17	99.7929	1
	High	PEERLTGLAR	1	1	1	X2JB25		0	4.69735e+06	0	0.001964	3.7	4.18048	3	1141.64	4.32052	381.217	33.7203	1
	High	GYIVGER	3	1	1	X2JB25		0	16474889712	0.003	0.09425	16.13	0.120672	2	793.422	2.64623	397.215	33.8035	0
X2JD55	Yolk protein 1, isoform B OS=Drosophila melanogaster OX=7227 GN=Yp1 PE=1 SV=1 - [X2JD55_DROME]	16975.8	9.76532e+10	599	79.04	1	35	37	439	48.6815	7.69385
	A2	Sequence	# PSMs	# Proteins	# Protein Groups	Protein Group Accessions	Modifications	ΔCn	Area	q-Value	PEP	IonScore	Exp Value	Charge	MH+ [Da]	ΔM [ppm]	m/z [Da]	RT [min]	# Missed Cleavages
	High	PSQWLSGSQLEAIPALDDFTIER	5	1	1	X2JD55		0	7980100272	0	1.578e-14	130.9	1.6094e-12	2	2573.29	0.0180224	1287.15	129.255	0
	High	AYMGIDTAHDLEGDYILQVNPK	6	1	1	X2JD55		0	639887806	0	4.662e-12	120.01	1.35687e-11	2	2463.19	3.14387	1232.1	98.4561	0
	High	GDAEFVDAIHTSVYGMGTPIR	99	1	1	X2JD55		0	1.61609e+10	0	3.456e-11	107.08	2.63465e-10	2	2236.08	2.9295	1118.54	100.016	0
	High	SGDVDFYPNGPAAGVPGASNVVEAAMR	6	1	1	X2JD55		0	24052918512	0	2.875e-12	100.7	8.0007e-10	3	2648.25	1.83272	883.42	52.0229	0
	High	QNFGEDEVTIIVTGLPQTSETVK	38	1	1	X2JD55		0	5839291073	0	2.016e-10	98.63	2.09059e-09	2	2505.28	1.66423	1253.14	110.209	0
	High	QSSYHGVHQAWNTNQDSK	12	1	1	X2JD55		0	1.70669e+10	0	5.133e-08	91.15	3.45313e-09	2	2086.93	-0.320535	1043.97	27.4543	0
	High	RAYMGIDTAHDLEGDYILQVNPK	137	1	1	X2JD55		0	10172138504	0	1.516e-15	89.76	1.46369e-08	3	2619.29	0.766795	873.768	44.0968	1
	High	mDNSVNQALK	6	1	1	X2JD55	M1(Oxidation)	0	540152980	0	4.054e-06	89.48	8.67942e-09	2	1135.54	0.582467	568.275	20.3111	0
	High	TVAPLNEMIQR	6	1	1	X2JD55		0	34522395610	0	9.644e-06	89.38	1.41875e-08	2	1271.68	0.543396	636.343	36.5682	0
	High	TQSGDIIVIDLGSK	109	1	1	X2JD55		0	31364458796	0	1.096e-07	87.01	2.7969e-08	2	1445.79	1.29709	723.397	44.3848	0
	High	GDAEFVDAIHTSVYGmGTPIR	8	1	1	X2JD55	M16(Oxidation)	0	1.39832e+09	0	2.34e-11	84.47	4.14436e-08	2	2252.07	0.0714838	1126.54	85.6703	0
	High	RAYmGIDTAHDLEGDYILQVNPK	7	1	1	X2JD55	M4(Oxidation)	0	682162913	0	2.186e-14	84.43	5.06613e-08	3	2635.29	1.07047	879.1	40.0781	1
	High	SGDVDFYPNGPAAGVPGASNVVEAAmR	4	1	1	X2JD55	M26(Oxidation)	0	557098790	0	6.315e-13	83.21	5.10956e-08	2	2664.23	-0.59443	1332.62	96.0588	0
	High	QNFGEDEVTIIVTGLPQTSETVKK	12	1	1	X2JD55		0	20577699936	0	2.69e-09	74.4	4.39324e-07	2	2633.37	0.656438	1317.19	96.7199	1
	High	TVAPLNEmIQR	6	1	1	X2JD55	M8(Oxidation)	0	1083924276	0	1.592e-05	73.71	8.08637e-07	2	1287.68	4.20122	644.343	28.5965	0
	High	SFPAVPANSLQQYK	8	1	1	X2JD55		0	113421018944	0	2.886e-06	72.92	8.29571e-07	2	1549.8	-0.0919158	775.404	38.3387	0
	High	MDNSVNQALK	2	1	1	X2JD55		0	6.79881e+09	0	0.000168	69.87	1.22101e-06	2	1119.55	0.846333	560.277	23.447	0
	High	NTLTGLARGDAEFVDAIHTSVYGMGTPIR	17	1	1	X2JD55		0	5004585475	0	1.003e-12	61.63	9.72202e-06	3	3062.53	-0.66033	1021.52	104.912	1
	High	LENMNLER	2	1	1	X2JD55		0	3010454272	0	0.001635	60.39	9.50678e-06	2	1018.5	0.881706	509.753	25.4446	0
	High	LVQAYMQR	4	1	1	X2JD55		0	28286534288	0	0.001634	58.53	1.6974e-05	2	1008.53	0.702707	504.769	25.0997	0
	High	YAmLDIEK	8	1	1	X2JD55	M3(Oxidation)	0	2723593991	0	0.0005691	58.34	1.03321e-05	2	998.487	0.87524	499.747	28.9904	0
	High	KLVQAYMQR	4	1	1	X2JD55		0	478531718	0	5.104e-05	58.1	1.64175e-05	2	1136.63	0.892625	568.816	21.1208	1
	High	NTLTGLARGDAEFVDAIHTSVYGmGTPIR	2	1	1	X2JD55	M24(Oxidation)	0	623916904	0	9.613e-10	57.98	2.80229e-05	3	3078.54	1.98616	1026.85	96.4543	1
	High	AYmGIDTAHDLEGDYILQVNPK	1	1	1	X2JD55	M3(Oxidation)	0	6.15438e+07	0	4.342e-09	55.6	3.75952e-05	3	2479.18	-0.320804	827.065	89.9865	0
	High	GAELLQQVYHLSQIHHNVEPNYVPSGIQVYVPKPNGDK	2	1	1	X2JD55		0	1537459968	0	3.652e-16	55.4	2.76867e-05	3	4268.2	1.7077	1423.4	97.2192	1
	High	ATRYFAESVRPGNER	6	2	2	X2JB25;X2JD55		0	5115631337	0	1.035e-05	53.61	5.92296e-05	2	1752.88	-1.01502	876.942	21.38	2
	High	MDNSVNQALKPSQWLSGSQLEAIPALDDFTIER	1	1	1	X2JD55		0	8.16234e+07	0	2.275e-11	53.39	6.29945e-05	4	3673.82	1.38516	919.211	61.0639	1
	High	RVTGLDPSK	1	1	1	X2JD55		0	1286587270	0	0.001691	53.31	6.04324e-05	2	972.548	0.280383	486.777	15.8208	1
	High	LVQAYmQR	8	1	1	X2JD55	M6(Oxidation)	0	8.51742e+08	0	0.002222	50.6	8.97092e-05	2	1024.52	0.233769	512.766	19.7156	0
	High	NTLTGLAR	3	1	1	X2JD55		0	43264281896	0	0.0007045	50.48	0.000113711	2	845.484	0.305379	423.246	24.0944	0
	High	VTGLDPSK	3	1	1	X2JD55		0	4852968949	0	0.003549	49.58	9.74862e-05	2	816.447	0.464821	408.727	19.5141	0
	High	GAELLQQVYHLSQIHHNVEPNYVPSGIQVYVPK	5	1	1	X2JD55		0	11766418722	0	1.085e-11	47.41	0.000203338	3	3756.96	2.57774	1252.99	102.589	0
	High	YNLQQQR	4	1	1	X2JD55		0	7289225316	0	0.005361	46.3	0.000425478	2	949.486	0.976505	475.247	24.6018	0
	High	YAMLDIEK	6	1	1	X2JD55		0	18038939416	0	0.002937	45.92	0.000190615	2	982.492	0.807944	491.75	63.1694	0
	High	PSQWLSGSQLEAIPALDDFTIERLENMNLER	4	1	1	X2JD55		0	7601986114	0	1.874e-13	45.72	0.000296048	3	3572.77	0.850492	1191.6	129.782	1
	High	YFAESVRPGNER	22	2	2	X2JB25;X2JD55		0	136274283264	0	7.642e-05	45.14	0.000347533	2	1424.69	0.555335	712.85	23.0109	1
	High	mDNSVNQALKPSQWLSGSQLEAIPALDDFTIER	1	1	1	X2JD55	M1(Oxidation)	0	85932997	0	4.138e-09	43.09	0.000620998	3	3689.8	-1.98651	1230.61	128.519	1
	High	QKQNFGEDEVTIIVTGLPQTSETVK	1	1	1	X2JD55		0	0	0	3.306e-09	42.09	0.000927025	3	2761.43	2.2175	921.149	94.6782	1
	High	WIVQMVNELDMPFDTIHLIGQNVGAHVAGAAAQEFTR	4	1	1	X2JD55		0	1.15692e+08	0	2.134e-15	41.88	0.000888629	4	4079.03	0.404947	1020.51	129.841	0
	High	KLVQAYmQR	2	1	1	X2JD55	M7(Oxidation)	0	9992552	0	1.999e-05	41.04	0.000991678	2	1152.62	-1.69793	576.812	22.0479	1
	High	QNDGFGK	2	1	1	X2JD55		0	84046205	0	0.002088	35.96	0.000557728	2	765.353	0.101171	383.18	7.14605	0
	High	SKNTLTGLAR	2	1	1	X2JD55		0	86654315	0	0.0001135	32.42	0.00713131	2	1060.61	0.717166	530.81	18.5382	1
	High	PSQWLSGSQLEAIPALDDFTIERLENmNLER	3	1	1	X2JD55	M27(Oxidation)	0	699856306	0	2.634e-10	31.12	0.00977441	3	3588.76	-0.763674	1196.93	128.546	1
	High	PNGRMDNSVNQALKPSQWLSGSQLEAIPALDDFTIER	1	1	1	X2JD55		0	0	0	1.18e-07	21.78	0.0839635	4	4098.05	2.78381	1025.27	115.159	2
	High	SKNTLTGLARGDAEFVDAIHTSVYGMGTPIR	1	1	1	X2JD55		0	2.66534e+07	0	3.101e-10	18.96	0.156916	4	3277.66	0.12809	820.171	93.4755	2
	High	VTGLDPSKIVAK	1	1	1	X2JD55		0	4.22548e+07	0	2.668e-05	16.9	0.228675	3	1227.73	0.419521	409.915	54.9803	1
	High	PNGRMDNSVNQALK	3	1	1	X2JD55		0	5.26106e+09	0	0.001013	16.76	0.231949	3	1543.77	0.903028	515.26	15.8455	1
	High	GDAEFVDAIHTSVYGMGTPIRSGDVDFYPNGPAAGVPGASNVVEAAMR	2	1	1	X2JD55		0	7.34407e+08	0	5.114e-13	15.14	0.244957	4	4865.3	1.69553	1217.08	120.661	1
	High	GDAEFVDAIHTSVYGmGTPIRSGDVDFYPNGPAAGVPGASNVVEAAMR	1	1	1	X2JD55	M16(Oxidation)	0	0	0	4.976e-10	10.61	0.638686	4	4881.27	-3.87036	1221.07	115.311	1
	High	YNLQQQRQHGK	1	1	1	X2JD55		0	7.22595e+06	0.001	0.0422	9.23	1.42085	3	1399.72	-2.21247	467.243	8.70405	1
X2JEX8	Yolk protein 3, isoform B OS=Drosophila melanogaster OX=7227 GN=Yp3 PE=1 SV=1 - [X2JEX8_DROME]	14295	74707699909	532	83.57	5	36	36	420	46.0726	8.49951
	A2	Sequence	# PSMs	# Proteins	# Protein Groups	Protein Group Accessions	Modifications	ΔCn	Area	q-Value	PEP	IonScore	Exp Value	Charge	MH+ [Da]	ΔM [ppm]	m/z [Da]	RT [min]	# Missed Cleavages
	High	cGDVDFYPNGPSTGVPGSENVIEAVAR	9	1	1	X2JEX8	C1(Carbamidomethyl)	0	1.48309e+10	0	4.476e-14	132.45	3.69754e-13	2	2807.29	-1.56478	1404.15	105.878	0
	High	AASGDLIIIDLGSTLTNFK	113	1	1	X2JEX8		0	30403212858	0	2.572e-10	126.19	2.45245e-12	2	1949.06	-1.22781	975.032	71.9622	0
	High	AASGDLIIIDLGSTLTNFKR	4	1	1	X2JEX8		0	888781094	0	9.979e-14	115.41	2.66159e-11	2	2105.16	-0.694625	1053.08	117.513	1
	High	RYAMLDVLNTGAMIGQTLIDLTNK	6	1	1	X2JEX8		0	12455712896	0	2.149e-16	114.12	5.05371e-11	2	2651.39	1.67431	1326.2	129.783	1
	High	RYAMLDVLNTGAmIGQTLIDLTNK	7	1	1	X2JEX8	M13(Oxidation)	0	9.18592e+08	0	2.902e-13	112.46	9.67664e-11	3	2667.39	0.796873	889.8	65.7724	1
	High	AQPGFGEDEVTIVLTGLPK	45	1	1	X2JEX8		0	46124018386	0	2.116e-10	108.5	1.86455e-10	2	1971.05	1.1469	986.026	123.649	0
	High	WLTATELENVPSLNDITWER	6	1	1	X2JEX8		0	6.63749e+09	0	8.529e-13	108.46	2.18118e-10	2	2387.18	-2.79466	1194.09	126.229	0
	High	GVPQEIIHLIGQGISAHVAGAAGNK	50	1	1	X2JEX8		0	76719931858	0	8.38e-17	101.88	5.83771e-10	2	2437.34	2.18767	1219.17	106.075	0
	High	GDADFVDAIHTSTFAMGTPIR	4	1	1	X2JEX8		0	7.10648e+09	0	2.16e-09	77.28	2.27288e-07	3	2222.06	2.48173	741.358	49.4049	0
	High	RYAmLDVLNTGAmIGQTLIDLTNK	2	1	1	X2JEX8	M4(Oxidation); M13(Oxidation)	0	6.6521e+07	0	1.009e-11	77.21	3.79265e-07	3	2683.39	2.11848	895.133	59.1721	1
	High	YAMLDVLNTGAMIGQTLIDLTNK	1	1	1	X2JEX8		0	1.17976e+08	0	8.56e-11	73.08	7.4298e-07	3	2495.29	-1.36334	832.433	70.5535	0
	High	RPQILGGLSR	4	1	1	X2JEX8		0	14849394118	0	0.0006923	72.36	2.32306e-07	2	1096.66	1.11825	548.834	25.4939	1
	High	AYMGLQIDYDLRGDYILEVNAK	2	1	1	X2JEX8		0	145126964	0	1.673e-08	69.09	1.75717e-06	2	2560.28	3.67704	1280.65	129.432	1
	High	GDADFVDAIHTSTFAmGTPIR	3	1	1	X2JEX8	M16(Oxidation)	0	345111827	0	4.855e-10	61.37	6.96632e-06	2	2238.05	-0.139539	1119.53	91.1406	0
	High	YAmLDVLNTGAMIGQTLIDLTNK	1	1	1	X2JEX8	M3(Oxidation)	0	3.47578e+07	0	1.406e-09	60.85	1.25803e-05	3	2511.29	0.937549	837.767	69.8325	0
	High	HDLTPSFVPSPSNVPVWIIK	16	1	1	X2JEX8		0	80222855293	0	1.881e-11	60.38	1.21399e-05	2	2233.2	1.22336	1117.11	112.241	0
	High	LNNYVETAK	10	1	1	X2JEX8		0	15080184224	0	0.0001435	59.21	1.52936e-05	2	1051.54	0.731152	526.275	31.2665	0
	High	NAQEQQQQLK	2	1	1	X2JEX8		0	419707732	0	1.356e-05	57.9	1.33799e-05	2	1214.61	-0.869065	607.809	12.967	0
	High	RAYMGLQIDYDLRGDYILEVNAK	145	1	1	X2JEX8		0	1.51462e+09	0	3.742e-10	57.25	3.3529e-05	3	2716.38	0.590336	906.131	71.0463	2
	High	GDYILEVNAK	4	1	1	X2JEX8		0	702028940	0	1.524e-05	56.58	2.81326e-05	2	1121.59	1.43854	561.296	34.3859	0
	High	LIQAYVQK	7	1	1	X2JEX8		0	41387278016	0	0.0009899	54.5	2.50143e-05	2	962.567	-0.0937131	481.787	41.3998	0
	High	AQPGFGEDEVTIVLTGLPKTSPAQQK	1	1	1	X2JEX8		0	46555949	0	8.719e-11	53.81	6.92491e-05	3	2711.42	-3.49918	904.477	99.4543	1
	High	SPFGQRSPAHK	4	1	1	X2JEX8		0	2.44992e+08	0	1.795e-05	53.11	5.30188e-05	2	1211.63	-0.0445795	606.318	12.8151	1
	High	ITGLDPAK	3	5	1	X2JEX8		0	23180941504	0	0.009757	52.75	3.71619e-05	2	814.467	0.480627	407.737	23.2225	0
	High	QAAYHGMHHAQN	3	1	1	X2JEX8		0	1.64511e+07	0	1.495e-06	52.71	2.19677e-05	2	1364.59	0.122354	682.799	6.56666	0
	High	LENQPLEQGAK	2	1	1	X2JEX8		0	2944571455	0	3.682e-05	51.59	0.000102974	2	1226.64	0.314479	613.823	21.1121	0
	High	YNLQQLQK	4	1	1	X2JEX8		0	40472138944	0	0.006257	49.57	0.000152363	2	1034.56	0.209412	517.785	27.2335	0
	High	RITGLDPAK	2	2	1	X2JEX8		0	1825122280	0	0.002984	47.32	9.54569e-05	2	970.569	0.6077	485.788	18.6449	1
	High	NFPAVPANSLK	7	1	1	X2JEX8		0	67180312576	0	0.000175	47.19	0.000364782	2	1157.63	1.16335	579.32	33.5125	0
	High	DASNDRLKPTK	20	1	1	X2JEX8		0	2474559644	0	0.0004438	45.19	0.000594788	2	1244.66	-0.434034	622.833	8.94337	2
	High	WLTATELENVPSLNDITWERLENQPLEQGAK	7	1	1	X2JEX8		0	61397932045	0	5.813e-14	43.27	0.000847759	3	3594.81	1.07523	1198.94	123.69	1
	High	RLIQAYVQK	4	1	1	X2JEX8		0	4654968634	0	8.149e-05	42.87	0.000374402	2	1118.67	0.369484	559.838	21.7016	1
	High	RPQILGGLSRGDADFVDAIHTSTFAMGTPIR	3	1	1	X2JEX8		0	18951720480	0	1.654e-11	35.03	0.00414547	3	3299.7	-0.0744562	1100.57	98.174	2
	High	IYHVGQIK	7	1	1	X2JEX8		0	35896218720	0	0.0001805	34.99	0.00489698	2	957.553	0.925832	479.28	20.2553	0
	High	YFAESVRPGSER	8	1	1	X2JEX8		0	62129164712	0	8.555e-05	33.52	0.00558012	2	1397.68	1.46502	699.345	36.181	1
	High	IYHVGQIKHDLTPSFVPSPSNVPVWIIK	1	1	1	X2JEX8		0	3.30577e+07	0	4.369e-10	32.87	0.00271119	3	3171.74	0.877458	1057.92	99.0096	1
	High	ATRYFAESVRPGSER	5	1	1	X2JEX8		0	4500665400	0	1.46e-05	31.51	0.0105241	2	1725.87	1.53607	863.438	21.6012	2
	High	QYKEQDGFGKR	1	1	1	X2JEX8		0	1.16978e+06	0	0.003006	31.3	0.00997062	2	1355.67	0.212828	678.339	16.7551	2
	High	RPQILGGLSRGDADFVDAIHTSTFAmGTPIR	5	1	1	X2JEX8	M26(Oxidation)	0	689760402	0	6.894e-07	30.89	0.0110392	3	3315.69	-0.712622	1105.9	91.7475	2
	High	EQDGFGK	2	1	1	X2JEX8		0	158592480	0	0.006961	24.42	0.00686679	2	780.353	0.365682	390.68	13.2344	0
	High	RAYmGLQIDYDLRGDYILEVNAK	1	1	1	X2JEX8	M4(Oxidation)	0	2.03419e+07	0	0.0009581	2.84	9.15193	3	2732.37	0.616201	911.463	129.344	2
	High	LRRITGLDPAK	1	1	1	X2JEX8		0	1.45031e+07	0.009	0.3669	6.84	0.641744	3	1239.76	3.63281	413.924	29.5999	2
A0A0B4LH50	Actin 87E, isoform C OS=Drosophila melanogaster OX=7227 GN=Act87E PE=3 SV=1 - [A0A0B4LH50_DROME]	2243.08	1.98625e+10	102	66.76	2	4	24	376	41.7748	5.47803
	A2	Sequence	# PSMs	# Proteins	# Protein Groups	Protein Group Accessions	Modifications	ΔCn	Area	q-Value	PEP	IonScore	Exp Value	Charge	MH+ [Da]	ΔM [ppm]	m/z [Da]	RT [min]	# Missed Cleavages
	High	VAPEEHPVLLTEAPLNPK	7	4	3	CON_00698900.1;A0A0B4LH50;X2JCP8		0	26123549232	0	1.825e-13	105.38	3.17259e-10	2	1954.07	0.811814	977.537	36.7368	0
	High	SYELPDGQVITIGNER	7	5	3	CON_00698900.1;A0A0B4LH50;X2JCP8		0	1.07142e+10	0	2.943e-10	100.55	1.39646e-09	2	1790.89	0.149765	895.95	91.4664	0
	High	HQGVmVGMGQK	8	5	3	CON_00698900.1;A0A0B4LH50;X2JCP8	M5(Oxidation)	0	1.4014e+08	0	1.471e-07	72.24	4.41806e-07	2	1187.57	0.34318	594.287	16.6007	0
	High	AGFAGDDAPR	2	5	3	CON_00698900.1;A0A0B4LH50;X2JCP8		0	800481311	0	3.831e-06	71.5	3.78751e-07	2	976.448	-0.188012	488.728	31.2419	0
	High	DSYVGDEAQSKR	1	4	3	CON_00698900.1;A0A0B4LH50;X2JCP8		0	1.95937e+07	0	3.89e-06	64.12	2.7108e-06	2	1354.62	0.404294	677.816	23.846	1
	High	TTGIVLDSGDGVSHTVPIYEGYALPHAILR	6	3	2	A0A0B4LH50;X2JCP8		0	1.70723e+10	0	9.69e-13	59.9	1.31493e-05	4	3151.64	0.656351	788.667	102.307	0
	High	HQGVMVGMGQK	4	5	3	CON_00698900.1;A0A0B4LH50;X2JCP8		0	621009742	0	8.925e-08	59.22	9.87311e-06	2	1171.57	0.592061	586.29	19.0857	0
	High	LDLAGRDLTDYLMK	4	5	3	CON_00698900.1;A0A0B4LH50;X2JCP8		0	2.54526e+09	0	9.056e-07	55.64	3.90244e-05	2	1623.84	-1.00143	812.423	96.2482	1
	High	AVFPSIVGRPR	5	5	3	CON_00698900.1;A0A0B4LH50;X2JCP8		0	16391771536	0	6.586e-05	55.61	2.23953e-05	2	1198.71	0.646636	599.857	31.2756	1
	High	IWHHTFYNELR	11	4	3	CON_00698900.1;A0A0B4LH50;X2JCP8		0	10424998592	0	6.594e-07	55.36	4.8609e-05	3	1515.75	1.54261	505.922	27.409	0
	High	GYSFTTTAEREIVRDIK	6	4	3	CON_00698900.1;A0A0B4LH50;X2JCP8		0	3243136608	0	1.205e-07	55.09	6.05545e-05	2	1986.03	0.645411	993.519	37.2072	2
	High	FRcPESLFQPSFLGMEScGIHETVYNSIMK	2	1	1	A0A0B4LH50	C3(Carbamidomethyl); C18(Carbamidomethyl)	0	2.04522e+08	0	2.786e-15	54.05	3.28614e-05	4	3564.65	1.22416	891.917	52.4672	1
	High	DSYVGDEAQSK	2	4	3	CON_00698900.1;A0A0B4LH50;X2JCP8		0	268443056	0	2.636e-05	50.43	4.25694e-05	2	1198.52	0.189597	599.765	29.4711	0
	High	cDVDIRK	3	4	3	CON_00698900.1;A0A0B4LH50;X2JCP8	C1(Carbamidomethyl)	0	301943090	0	0.005629	45.91	0.000402624	2	905.45	-1.01109	453.229	18.1723	1
	High	GYSFTTTAER	2	4	3	CON_00698900.1;A0A0B4LH50;X2JCP8		0	2.19327e+09	0	0.0004773	40.69	0.00055025	2	1132.53	1.45758	566.768	26.7733	0
	High	IIAPPER	1	5	3	CON_00698900.1;A0A0B4LH50;X2JCP8		0	280351310	0	0.007415	40.05	0.000237253	2	795.473	0.430623	398.24	33.3136	0
	High	YPIEHGIITNWDDmEK	3	3	1	A0A0B4LH50	M14(Oxidation)	0	1.99387e+08	0	2.485e-05	39.06	0.000776033	2	1976.9	-2.59591	988.954	69.1912	0
	High	YPIEHGIITNWDDMEK	3	3	1	A0A0B4LH50		0	3363568968	0	1.819e-05	37.67	0.00128251	2	1960.91	-0.914889	980.958	78.1693	0
	High	IIAPPERK	3	5	3	CON_00698900.1;A0A0B4LH50;X2JCP8		0	5469494800	0	0.00799	34.26	0.00106867	2	923.567	0.0412272	462.287	17.0842	1
	High	HQGVmVGmGQK	2	5	3	CON_00698900.1;A0A0B4LH50;X2JCP8	M5(Oxidation); M8(Oxidation)	0	0	0	0.002324	32.9	0.00192323	3	1203.56	0.647574	401.859	8.94748	0
	High	LcYVALDFEQEMATAAASTSLEK	2	2	1	A0A0B4LH50	C2(Carbamidomethyl)	0	3.61198e+06	0	4.816e-09	32.32	0.00527524	3	2548.2	1.38529	850.071	125.299	0
	High	DLTDYLMK	3	5	3	CON_00698900.1;A0A0B4LH50;X2JCP8		0	532766449	0	0.002882	29.51	0.00789204	2	998.487	0.757992	499.747	47.0096	0
	High	GYSFTTTAEREIVR	4	4	3	CON_00698900.1;A0A0B4LH50;X2JCP8		0	3827819848	0	0.0002786	29.27	0.0165034	2	1629.82	-0.975873	815.414	62.4627	1
	High	DLTDYLmK	2	5	3	CON_00698900.1;A0A0B4LH50;X2JCP8	M7(Oxidation)	0	3.96389e+07	0	0.004819	27.77	0.0119483	2	1014.48	1.12583	507.745	40.9495	0
	High	IWHHTFYNELRVAPEEHPVLLTEAPLNPK	1	3	3	CON_00698900.1;A0A0B4LH50;X2JCP8		0	8.44307e+07	0	9.481e-08	20.72	0.0893825	4	3450.8	-0.0157143	863.454	82.4592	1
	High	LDLAGRDLTDYLmK	3	5	3	CON_00698900.1;A0A0B4LH50;X2JCP8	M13(Oxidation)	0	235723701	0	4.855e-05	20.07	0.173678	3	1639.84	1.72885	547.284	87.5837	1
	High	EITALAPSTIK	1	2	1	A0A0B4LH50		0	1.1753e+08	0	0.0002915	19.93	0.149389	2	1143.66	0.225367	572.335	60.9188	0
	High	RGILTLK	2	4	3	CON_00698900.1;A0A0B4LH50;X2JCP8		0	4.01127e+09	0.001	0.02913	36.18	0.000698873	2	800.536	1.0344	400.772	22.2639	1
	High	EIVRDIK	2	5	3	CON_00698900.1;A0A0B4LH50;X2JCP8		0	542641579	0.001	0.03385	31.14	0.0107678	2	872.52	0.239462	436.764	17.6628	1
X2JCP8	Actin 5C, isoform E OS=Drosophila melanogaster OX=7227 GN=Act5C PE=3 SV=1 - [X2JCP8_DROME]	5409.69	1.98625e+10	164	71.81	1	2	27	376	41.7948	5.47803
	A2	Sequence	# PSMs	# Proteins	# Protein Groups	Protein Group Accessions	Modifications	ΔCn	Area	q-Value	PEP	IonScore	Exp Value	Charge	MH+ [Da]	ΔM [ppm]	m/z [Da]	RT [min]	# Missed Cleavages
	High	DLYANTVLSGGTTMYPGIADR	17	2	2	CON_00698900.1;X2JCP8		0	4.6884e+08	0	2.198e-15	160.87	9.78065e-16	2	2215.07	-0.5219	1108.04	108.434	0
	High	VAPEEHPVLLTEAPLNPK	7	4	3	CON_00698900.1;A0A0B4LH50;X2JCP8		0	26123549232	0	1.825e-13	105.38	3.17259e-10	2	1954.07	0.811814	977.537	36.7368	0
	High	SYELPDGQVITIGNER	7	5	3	CON_00698900.1;A0A0B4LH50;X2JCP8		0	1.07142e+10	0	2.943e-10	100.55	1.39646e-09	2	1790.89	0.149765	895.95	91.4664	0
	High	LcYVALDFEQEMATAASSSSLEK	35	2	2	CON_00698900.1;X2JCP8	C2(Carbamidomethyl)	0	3.16096e+08	0	4.641e-13	98.58	1.22035e-09	2	2550.18	2.74902	1275.59	120.3	0
	High	QEYDESGPSIVHR	3	2	2	CON_00698900.1;X2JCP8		0	273309072	0	1.125e-08	92.17	3.82244e-09	2	1516.71	1.59189	758.856	40.6707	0
	High	FRcPEALFQPSFLGMEAcGIHETTYNSIMK	4	1	1	X2JCP8	C3(Carbamidomethyl); C18(Carbamidomethyl)	0	6.3585e+08	0	2.741e-11	78.37	8.95107e-08	3	3534.62	-2.62936	1178.88	106.27	1
	High	QEYDESGPSIVHRK	6	2	2	CON_00698900.1;X2JCP8		0	1416029056	0	4.274e-07	76.57	2.69858e-07	2	1644.8	-0.980786	822.902	29.7858	1
	High	HQGVmVGMGQK	8	5	3	CON_00698900.1;A0A0B4LH50;X2JCP8	M5(Oxidation)	0	1.4014e+08	0	1.471e-07	72.24	4.41806e-07	2	1187.57	0.34318	594.287	16.6007	0
	High	AGFAGDDAPR	2	5	3	CON_00698900.1;A0A0B4LH50;X2JCP8		0	800481311	0	3.831e-06	71.5	3.78751e-07	2	976.448	-0.188012	488.728	31.2419	0
	High	DLYANTVLSGGTTmYPGIADR	1	2	2	CON_00698900.1;X2JCP8	M14(Oxidation)	0	43010310	0	2.835e-11	64.44	4.06517e-06	2	2231.07	2.85529	1116.04	98.5586	0
	High	DSYVGDEAQSKR	1	4	3	CON_00698900.1;A0A0B4LH50;X2JCP8		0	1.95937e+07	0	3.89e-06	64.12	2.7108e-06	2	1354.62	0.404294	677.816	23.846	1
	High	TTGIVLDSGDGVSHTVPIYEGYALPHAILR	6	3	2	A0A0B4LH50;X2JCP8		0	1.70723e+10	0	9.69e-13	59.9	1.31493e-05	4	3151.64	0.656351	788.667	102.307	0
	High	HQGVMVGMGQK	4	5	3	CON_00698900.1;A0A0B4LH50;X2JCP8		0	621009742	0	8.925e-08	59.22	9.87311e-06	2	1171.57	0.592061	586.29	19.0857	0
	High	EITALAPSTMK	3	3	2	CON_00698900.1;X2JCP8		0	3788118137	0	2.089e-05	57.22	4.34346e-05	2	1161.62	1.15982	581.314	32.2212	0
	High	LDLAGRDLTDYLMK	4	5	3	CON_00698900.1;A0A0B4LH50;X2JCP8		0	2.54526e+09	0	9.056e-07	55.64	3.90244e-05	2	1623.84	-1.00143	812.423	96.2482	1
	High	AVFPSIVGRPR	5	5	3	CON_00698900.1;A0A0B4LH50;X2JCP8		0	16391771536	0	6.586e-05	55.61	2.23953e-05	2	1198.71	0.646636	599.857	31.2756	1
	High	IWHHTFYNELR	11	4	3	CON_00698900.1;A0A0B4LH50;X2JCP8		0	10424998592	0	6.594e-07	55.36	4.8609e-05	3	1515.75	1.54261	505.922	27.409	0
	High	GYSFTTTAEREIVRDIK	6	4	3	CON_00698900.1;A0A0B4LH50;X2JCP8		0	3243136608	0	1.205e-07	55.09	6.05545e-05	2	1986.03	0.645411	993.519	37.2072	2
	High	DSYVGDEAQSK	2	4	3	CON_00698900.1;A0A0B4LH50;X2JCP8		0	268443056	0	2.636e-05	50.43	4.25694e-05	2	1198.52	0.189597	599.765	29.4711	0
	High	EITALAPSTmK	2	3	2	CON_00698900.1;X2JCP8	M10(Oxidation)	0	214037536	0	1.922e-05	48.6	0.000238806	2	1177.61	0.279174	589.31	45.3677	0
	High	cPEALFQPSFLGMEAcGIHETTYNSIMK	1	1	1	X2JCP8	C1(Carbamidomethyl); C16(Carbamidomethyl)	0	4.20157e+07	0	3.192e-11	48.5	9.60526e-05	3	3231.47	3.0121	1077.83	112.17	0
	High	cDVDIRK	3	4	3	CON_00698900.1;A0A0B4LH50;X2JCP8	C1(Carbamidomethyl)	0	301943090	0	0.005629	45.91	0.000402624	2	905.45	-1.01109	453.229	18.1723	1
	High	GYSFTTTAER	2	4	3	CON_00698900.1;A0A0B4LH50;X2JCP8		0	2.19327e+09	0	0.0004773	40.69	0.00055025	2	1132.53	1.45758	566.768	26.7733	0
	High	IIAPPER	1	5	3	CON_00698900.1;A0A0B4LH50;X2JCP8		0	280351310	0	0.007415	40.05	0.000237253	2	795.473	0.430623	398.24	33.3136	0
	High	FRcPEALFQPSFLGmEAcGIHETTYNSIMK	1	1	1	X2JCP8	C3(Carbamidomethyl); M15(Oxidation); C18(Carbamidomethyl)	0	4.76254e+06	0	1.539e-11	39.61	0.000596206	4	3550.63	-0.00304753	888.412	101.433	1
	High	IIAPPERK	3	5	3	CON_00698900.1;A0A0B4LH50;X2JCP8		0	5469494800	0	0.00799	34.26	0.00106867	2	923.567	0.0412272	462.287	17.0842	1
	High	HQGVmVGmGQK	2	5	3	CON_00698900.1;A0A0B4LH50;X2JCP8	M5(Oxidation); M8(Oxidation)	0	0	0	0.002324	32.9	0.00192323	3	1203.56	0.647574	401.859	8.94748	0
	High	DLTDYLMK	3	5	3	CON_00698900.1;A0A0B4LH50;X2JCP8		0	532766449	0	0.002882	29.51	0.00789204	2	998.487	0.757992	499.747	47.0096	0
	High	GYSFTTTAEREIVR	4	4	3	CON_00698900.1;A0A0B4LH50;X2JCP8		0	3827819848	0	0.0002786	29.27	0.0165034	2	1629.82	-0.975873	815.414	62.4627	1
	High	DLTDYLmK	2	5	3	CON_00698900.1;A0A0B4LH50;X2JCP8	M7(Oxidation)	0	3.96389e+07	0	0.004819	27.77	0.0119483	2	1014.48	1.12583	507.745	40.9495	0
	High	IWHHTFYNELRVAPEEHPVLLTEAPLNPK	1	3	3	CON_00698900.1;A0A0B4LH50;X2JCP8		0	8.44307e+07	0	9.481e-08	20.72	0.0893825	4	3450.8	-0.0157143	863.454	82.4592	1
	High	LDLAGRDLTDYLmK	3	5	3	CON_00698900.1;A0A0B4LH50;X2JCP8	M13(Oxidation)	0	235723701	0	4.855e-05	20.07	0.173678	3	1639.84	1.72885	547.284	87.5837	1
	High	RGILTLK	2	4	3	CON_00698900.1;A0A0B4LH50;X2JCP8		0	4.01127e+09	0.001	0.02913	36.18	0.000698873	2	800.536	1.0344	400.772	22.2639	1
	High	EIVRDIK	2	5	3	CON_00698900.1;A0A0B4LH50;X2JCP8		0	542641579	0.001	0.03385	31.14	0.0107678	2	872.52	0.239462	436.764	17.6628	1
CON_00698900.1	SWISS-PROT:P60712 (Bos taurus) Actin, cytoplasmic 1	5075.07	1.77432e+10	153	60.53	1	1	25	375	41.7097	5.47803
	A2	Sequence	# PSMs	# Proteins	# Protein Groups	Protein Group Accessions	Modifications	ΔCn	Area	q-Value	PEP	IonScore	Exp Value	Charge	MH+ [Da]	ΔM [ppm]	m/z [Da]	RT [min]	# Missed Cleavages
	High	DLYANTVLSGGTTMYPGIADR	17	2	2	CON_00698900.1;X2JCP8		0	4.6884e+08	0	2.198e-15	160.87	9.78065e-16	2	2215.07	-0.5219	1108.04	108.434	0
	High	VAPEEHPVLLTEAPLNPK	7	4	3	CON_00698900.1;A0A0B4LH50;X2JCP8		0	26123549232	0	1.825e-13	105.38	3.17259e-10	2	1954.07	0.811814	977.537	36.7368	0
	High	SYELPDGQVITIGNER	7	5	3	CON_00698900.1;A0A0B4LH50;X2JCP8		0	1.07142e+10	0	2.943e-10	100.55	1.39646e-09	2	1790.89	0.149765	895.95	91.4664	0
	High	LcYVALDFEQEMATAASSSSLEK	35	2	2	CON_00698900.1;X2JCP8	C2(Carbamidomethyl)	0	3.16096e+08	0	4.641e-13	98.58	1.22035e-09	2	2550.18	2.74902	1275.59	120.3	0
	High	QEYDESGPSIVHR	3	2	2	CON_00698900.1;X2JCP8		0	273309072	0	1.125e-08	92.17	3.82244e-09	2	1516.71	1.59189	758.856	40.6707	0
	High	QEYDESGPSIVHRK	6	2	2	CON_00698900.1;X2JCP8		0	1416029056	0	4.274e-07	76.57	2.69858e-07	2	1644.8	-0.980786	822.902	29.7858	1
	High	HQGVmVGMGQK	8	5	3	CON_00698900.1;A0A0B4LH50;X2JCP8	M5(Oxidation)	0	1.4014e+08	0	1.471e-07	72.24	4.41806e-07	2	1187.57	0.34318	594.287	16.6007	0
	High	AGFAGDDAPR	2	5	3	CON_00698900.1;A0A0B4LH50;X2JCP8		0	800481311	0	3.831e-06	71.5	3.78751e-07	2	976.448	-0.188012	488.728	31.2419	0
	High	DLYANTVLSGGTTmYPGIADR	1	2	2	CON_00698900.1;X2JCP8	M14(Oxidation)	0	43010310	0	2.835e-11	64.44	4.06517e-06	2	2231.07	2.85529	1116.04	98.5586	0
	High	DSYVGDEAQSKR	1	4	3	CON_00698900.1;A0A0B4LH50;X2JCP8		0	1.95937e+07	0	3.89e-06	64.12	2.7108e-06	2	1354.62	0.404294	677.816	23.846	1
	High	HQGVMVGMGQK	4	5	3	CON_00698900.1;A0A0B4LH50;X2JCP8		0	621009742	0	8.925e-08	59.22	9.87311e-06	2	1171.57	0.592061	586.29	19.0857	0
	High	EITALAPSTMK	3	3	2	CON_00698900.1;X2JCP8		0	3788118137	0	2.089e-05	57.22	4.34346e-05	2	1161.62	1.15982	581.314	32.2212	0
	High	LDLAGRDLTDYLMK	4	5	3	CON_00698900.1;A0A0B4LH50;X2JCP8		0	2.54526e+09	0	9.056e-07	55.64	3.90244e-05	2	1623.84	-1.00143	812.423	96.2482	1
	High	AVFPSIVGRPR	5	5	3	CON_00698900.1;A0A0B4LH50;X2JCP8		0	16391771536	0	6.586e-05	55.61	2.23953e-05	2	1198.71	0.646636	599.857	31.2756	1
	High	IWHHTFYNELR	11	4	3	CON_00698900.1;A0A0B4LH50;X2JCP8		0	10424998592	0	6.594e-07	55.36	4.8609e-05	3	1515.75	1.54261	505.922	27.409	0
	High	GYSFTTTAEREIVRDIK	6	4	3	CON_00698900.1;A0A0B4LH50;X2JCP8		0	3243136608	0	1.205e-07	55.09	6.05545e-05	2	1986.03	0.645411	993.519	37.2072	2
	High	DSYVGDEAQSK	2	4	3	CON_00698900.1;A0A0B4LH50;X2JCP8		0	268443056	0	2.636e-05	50.43	4.25694e-05	2	1198.52	0.189597	599.765	29.4711	0
	High	EITALAPSTmK	2	3	2	CON_00698900.1;X2JCP8	M10(Oxidation)	0	214037536	0	1.922e-05	48.6	0.000238806	2	1177.61	0.279174	589.31	45.3677	0
	High	cDVDIRK	3	4	3	CON_00698900.1;A0A0B4LH50;X2JCP8	C1(Carbamidomethyl)	0	301943090	0	0.005629	45.91	0.000402624	2	905.45	-1.01109	453.229	18.1723	1
	High	dDDIAALVVDNGSGMcK	1	1	1	CON_00698900.1	N-Term(Acetyl); C16(Carbamidomethyl)	0	6.88627e+07	0	3.116e-08	44.52	0.00017306	2	1821.8	0.55568	911.404	108.583	0
	High	GYSFTTTAER	2	4	3	CON_00698900.1;A0A0B4LH50;X2JCP8		0	2.19327e+09	0	0.0004773	40.69	0.00055025	2	1132.53	1.45758	566.768	26.7733	0
	High	IIAPPER	1	5	3	CON_00698900.1;A0A0B4LH50;X2JCP8		0	280351310	0	0.007415	40.05	0.000237253	2	795.473	0.430623	398.24	33.3136	0
	High	IIAPPERK	3	5	3	CON_00698900.1;A0A0B4LH50;X2JCP8		0	5469494800	0	0.00799	34.26	0.00106867	2	923.567	0.0412272	462.287	17.0842	1
	High	HQGVmVGmGQK	2	5	3	CON_00698900.1;A0A0B4LH50;X2JCP8	M5(Oxidation); M8(Oxidation)	0	0	0	0.002324	32.9	0.00192323	3	1203.56	0.647574	401.859	8.94748	0
	High	DLTDYLMK	3	5	3	CON_00698900.1;A0A0B4LH50;X2JCP8		0	532766449	0	0.002882	29.51	0.00789204	2	998.487	0.757992	499.747	47.0096	0
	High	GYSFTTTAEREIVR	4	4	3	CON_00698900.1;A0A0B4LH50;X2JCP8		0	3827819848	0	0.0002786	29.27	0.0165034	2	1629.82	-0.975873	815.414	62.4627	1
	High	DLTDYLmK	2	5	3	CON_00698900.1;A0A0B4LH50;X2JCP8	M7(Oxidation)	0	3.96389e+07	0	0.004819	27.77	0.0119483	2	1014.48	1.12583	507.745	40.9495	0
	High	IWHHTFYNELRVAPEEHPVLLTEAPLNPK	1	3	3	CON_00698900.1;A0A0B4LH50;X2JCP8		0	8.44307e+07	0	9.481e-08	20.72	0.0893825	4	3450.8	-0.0157143	863.454	82.4592	1
	High	LDLAGRDLTDYLmK	3	5	3	CON_00698900.1;A0A0B4LH50;X2JCP8	M13(Oxidation)	0	235723701	0	4.855e-05	20.07	0.173678	3	1639.84	1.72885	547.284	87.5837	1
	High	RGILTLK	2	4	3	CON_00698900.1;A0A0B4LH50;X2JCP8		0	4.01127e+09	0.001	0.02913	36.18	0.000698873	2	800.536	1.0344	400.772	22.2639	1
	High	EIVRDIK	2	5	3	CON_00698900.1;A0A0B4LH50;X2JCP8		0	542641579	0.001	0.03385	31.14	0.0107678	2	872.52	0.239462	436.764	17.6628	1
A4V0U4	Leukotriene A(4) hydrolase OS=Drosophila melanogaster OX=7227 GN=Dmel\CG10602 PE=1 SV=1 - [A4V0U4_DROME]	1749.44	1.42923e+10	46	63.46	2	26	26	613	68.4462	5.50342
	A2	Sequence	# PSMs	# Proteins	# Protein Groups	Protein Group Accessions	Modifications	ΔCn	Area	q-Value	PEP	IonScore	Exp Value	Charge	MH+ [Da]	ΔM [ppm]	m/z [Da]	RT [min]	# Missed Cleavages
	High	IDYETSSSASGLQWLNPTQTLGK	2	2	1	A4V0U4		0	155637404	0	1.421e-14	120.56	1.24382e-11	2	2496.22	-1.74922	1248.61	107.689	0
	High	RLDEILEFANSNFR	4	2	1	A4V0U4		0	183301106	0	8.825e-14	119.98	1.54711e-11	2	1723.88	0.0574706	862.442	48.5087	1
	High	MLSNLTDLQEcIR	2	2	1	A4V0U4	C11(Carbamidomethyl)	0	112672714	0	7.072e-09	110.87	1.10084e-10	2	1592.78	0.6784	796.893	44.1102	0
	High	LVVDLSNcGPDDAFSSVPYIK	2	2	1	A4V0U4	C8(Carbamidomethyl)	0	2.24861e+08	0	5.652e-10	104.12	5.30543e-10	2	2296.12	2.47668	1148.56	111.57	0
	High	TATELcGPYVWK	1	2	1	A4V0U4	C6(Carbamidomethyl)	0	180982004	0	8.588e-07	83.38	5.18894e-08	2	1424.69	-0.343775	712.847	38.9598	0
	High	FTYDATVEHPSELTALMSALIDK	2	2	1	A4V0U4		0	1.78408e+08	0	2.905e-13	75.42	3.8612e-07	3	2552.26	1.34508	851.426	59.8559	0
	High	EHPYMFSQcQAIHAR	2	2	1	A4V0U4	C9(Carbamidomethyl)	0	42044106	0	1.216e-08	74.38	1.75082e-07	3	1874.84	0.856105	625.62	45.5448	0
	High	LSAVDWDLWLK	2	2	1	A4V0U4		0	2.13484e+08	0	1.293e-06	70.21	1.26245e-06	2	1345.72	0.547375	673.362	57.2335	0
	High	INLLESTYNLK	2	2	1	A4V0U4		0	333186712	0	7.568e-07	69.26	1.46442e-06	2	1307.72	0.316248	654.364	42.5369	0
	High	GRLGVVDPSSYSQPDLITTEHSALNWK	2	1	1	A4V0U4		0	382743030	0	1.655e-12	65.88	4.40275e-06	3	2970.5	0.414092	990.837	91.3197	1
	High	LVSRPLGENSSVWAEEAIVDAcAEEFSETATMLK	1	2	1	A4V0U4	C22(Carbamidomethyl)	0	0	0	4.448e-14	59.97	1.16804e-05	3	3739.79	1.14536	1247.27	128.131	1
	High	SEGMPPVIPNFDESLANVTK	2	2	1	A4V0U4		0	16017517	0	4.175e-09	58.29	2.10518e-05	2	2145.05	-2.31876	1073.03	110.131	0
	High	SVIPcQDTPAVK	2	2	1	A4V0U4	C5(Carbamidomethyl)	0	275806332	0	4.828e-05	55.48	4.86999e-05	2	1314.67	-0.175428	657.84	29.2989	0
	High	ELASLWSSK	2	2	1	A4V0U4		0	180508306	0	0.000127	53.91	6.09665e-05	2	1020.54	-0.740181	510.771	36.9795	0
	High	LGVVDPSSYSQPDLITTEHSALNWK	1	2	1	A4V0U4		0	4.42414e+07	0	5.672e-11	51.32	0.000124706	3	2757.39	4.86238	919.8	100.766	0
	High	DFQSALYDYFIDTDKK	1	2	1	A4V0U4		0	230773202	0	5.881e-09	51.18	8.76391e-05	3	1968.93	1.31734	656.98	56.3605	1
	High	SLADVVAHEIAHSWTGNLVTNK	3	2	1	A4V0U4		0	247182096	0	5.842e-09	48.59	0.000228288	4	2362.22	1.61352	591.31	52.0809	0
	High	YLEDLFGGPTVFEPFLRDYLK	1	2	1	A4V0U4		0	42037410708	0	1.186e-09	46.99	0.000412971	3	2519.29	0.0279798	840.433	66.4439	1
	High	QEVPIPAYLVAIAIGK	2	2	1	A4V0U4		0	93584222	0	1.478e-08	46.61	8.40351e-05	3	1681.99	0.799741	561.335	62.8672	0
	High	VLTANLDK	2	2	1	A4V0U4		0	303576888	0	0.0009577	46.22	0.000274598	2	873.504	0.237806	437.256	35.408	0
	High	LTLELPSGTAK	3	2	1	A4V0U4		0	456699304	0	1.186e-05	46.14	0.000319835	2	1129.65	-0.0738876	565.327	37.2439	0
	High	IQGSVLHR	1	2	1	A4V0U4		0	6.56553e+07	0	0.00169	45.83	0.000181545	2	909.525	-1.85089	455.266	21.5671	0
	High	SVAELADSAEIK	1	2	1	A4V0U4		0	3.18546e+07	0	6.14e-05	20.65	0.135176	2	1232.64	0.155163	616.822	60.0859	0
	High	DLAGWPEAKPAAIR	1	2	1	A4V0U4		0	1.40459e+07	0	0.002168	11.98	0.684579	3	1494.81	0.632444	498.941	68.4962	1
	High	IDFAATK	1	2	1	A4V0U4		0	1.05866e+08	0.001	0.01294	37.45	0.000611616	2	765.414	-0.239441	383.211	37.8218	0
	High	DIVDLNEGK	1	2	1	A4V0U4		0	1.56862e+08	0.001	0.03043	13.85	0.76238	2	1002.51	2.46542	501.76	55.7036	0
A4V1F9	Ubiquitin-63E, isoform C OS=Drosophila melanogaster OX=7227 GN=Ubi-p63E PE=4 SV=1 - [A4V1F9_DROME]	708.363	9.58502e+09	30	73.66	5	6	6	763	85.7463	7.66455
	A2	Sequence	# PSMs	# Proteins	# Protein Groups	Protein Group Accessions	Modifications	ΔCn	Area	q-Value	PEP	IonScore	Exp Value	Charge	MH+ [Da]	ΔM [ppm]	m/z [Da]	RT [min]	# Missed Cleavages
	High	ESTLHLVLR	7	5	1	A4V1F9		0	6894673604	0	2.959e-05	72.54	4.26247e-07	2	1067.62	0.995175	534.315	30.3865	0
	High	TITLEVEPSDTIENVK	12	5	1	A4V1F9		0	1.81459e+10	0	4.803e-09	62.82	9.82105e-06	2	1787.93	-0.0489995	894.467	42.4342	0
	High	QLEDGRTLSDYNIQK	4	5	1	A4V1F9		0	3714494864	0	8.186e-08	56.22	4.21449e-05	2	1779.89	0.0131076	890.447	30.087	1
	High	TLSDYNIQK	3	5	1	A4V1F9		0	3428477785	0	0.0002863	53.99	4.80825e-05	2	1081.55	0.653583	541.28	26.1928	0
	High	EGIPPDQQR	3	5	1	A4V1F9		0	97416438	0	0.007582	16.06	0.255174	2	1039.52	-0.333116	520.262	26.77	0
	High	GGMQIFVK	1	4	1	A4V1F9		0	160730292	0.005	0.2147	14.09	0.571265	2	879.476	0.502063	440.242	20.4566	0
A4V3Q6	Elongation factor 1-alpha OS=Drosophila melanogaster OX=7227 GN=eEF1alpha2 PE=1 SV=1 - [A4V3Q6_DROME]	10703	9323706844	329	41.13	1	19	19	462	50.6305	8.95361
	A2	Sequence	# PSMs	# Proteins	# Protein Groups	Protein Group Accessions	Modifications	ΔCn	Area	q-Value	PEP	IonScore	Exp Value	Charge	MH+ [Da]	ΔM [ppm]	m/z [Da]	RT [min]	# Missed Cleavages
	High	NMITGTSQADcAVLIVAAGTGEFEAGISK	57	1	1	A4V3Q6	C11(Carbamidomethyl)	0	102552685	0	2.023e-13	98.08	2.23281e-09	3	2911.42	1.07379	971.145	72.0848	0
	High	YYVTIIDAPGHR	4	1	1	A4V3Q6		0	1765120323	0	5.503e-05	79.86	2.15847e-07	2	1404.73	1.15609	702.868	61.0592	0
	High	EHALLAFTLGVK	93	1	1	A4V3Q6		0	926366912	0	1.795e-06	74.64	2.83435e-07	3	1298.75	0.828172	433.587	56.9296	0
	High	IHINIVVIGHVDSGK	132	1	1	A4V3Q6		0	42817054	0	6.58e-12	69.64	9.61487e-07	3	1600.92	-0.0731022	534.31	65.5594	0
	High	STTTGHLIYK	4	1	1	A4V3Q6		0	9950284100	0	0.0003219	66.66	2.85901e-06	3	1120.6	0.938227	374.205	18.6376	0
	High	YYVTIIDAPGHRDFIK	7	1	1	A4V3Q6		0	10285400520	0	1.374e-09	61.32	1.36512e-05	2	1908	0.533388	954.505	36.9309	1
	High	QTVAVGVIK	4	1	1	A4V3Q6		0	5359039240	0	0.002004	58.73	9.04282e-06	2	914.567	0.413393	457.787	26.5596	0
	High	IGGIGTVPVGR	2	1	1	A4V3Q6		0	7735435912	0	9.91e-06	58.57	6.60227e-06	2	1025.61	0.481735	513.309	31.7678	0
	High	DMRQTVAVGVIK	4	1	1	A4V3Q6		0	2.07505e+08	0	1.086e-05	56.68	3.04992e-05	2	1316.74	-0.0304301	658.871	31.4655	1
	High	DmRQTVAVGVIK	4	1	1	A4V3Q6	M2(Oxidation)	0	497084973	0	1.039e-05	54.32	5.95423e-05	2	1332.73	0.488021	666.869	26.481	1
	High	GAADFTAQVIVLNHPGQIANGYTPVLDcHTAHIAcK	3	1	1	A4V3Q6	C28(Carbamidomethyl); C35(Carbamidomethyl)	0	2358186778	0	2.53e-10	53.96	6.83044e-05	4	3859.92	4.09786	965.735	92.0355	0
	High	LPLQDVYK	1	1	1	A4V3Q6		0	776952025	0	0.005812	36.26	0.00353705	2	975.551	0.146301	488.279	58.6611	0
	High	GYVAGDSK	2	1	1	A4V3Q6		0	33222418	0	0.006178	31.92	0.00138178	2	796.384	0.0781731	398.695	8.23272	0
	High	EVSSYIKK	2	1	1	A4V3Q6		0	481800551	0	0.003545	28.75	0.00773442	2	953.53	0.201154	477.269	17.2407	1
	High	TIEKFEK	2	1	1	A4V3Q6		0	5.31318e+07	0	0.00733	27.55	0.0119539	2	894.493	0.340418	447.75	15.3081	1
	High	NGQTREHALLAFTLGVK	2	1	1	A4V3Q6		0	2.68533e+07	0	8.313e-06	20.54	0.113476	3	1855.02	-0.862747	619.01	68.6052	1
	High	KEVSSYIK	1	1	1	A4V3Q6		0	4.68372e+08	0	0.002468	13.87	0.287143	2	953.53	-0.694982	477.268	22.2838	1
	High	FAVRDmRQTVAVGVIK	1	1	1	A4V3Q6	M6(Oxidation)	0	6.3145e+07	0	0.000191	6.83	1.8778	4	1806.01	0.855193	452.257	50.5555	2
	High	QLIVGVNK	2	1	1	A4V3Q6		0	4.58784e+09	0.001	0.01261	48.12	9.40437e-05	2	870.541	0.125001	435.774	41.7671	0
	High	EVSSYIK	2	1	1	A4V3Q6		0	3.35638e+09	0.001	0.02127	28.14	0.00429693	2	825.436	0.305461	413.221	32.3553	0
A1ZBL0	Tubulin beta chain OS=Drosophila melanogaster OX=7227 GN=betaTub56D PE=1 SV=1 - [A1ZBL0_DROME]	4409.7	8.43756e+09	146	70.61	1	6	25	456	51.2638	5.0083
	A2	Sequence	# PSMs	# Proteins	# Protein Groups	Protein Group Accessions	Modifications	ΔCn	Area	q-Value	PEP	IonScore	Exp Value	Charge	MH+ [Da]	ΔM [ppm]	m/z [Da]	RT [min]	# Missed Cleavages
	High	GHYTEGAELVDSVLDVVR	4	2	2	CON_00697107.2;A1ZBL0		0	358072270	0	3.887e-13	113.18	1.07468e-10	2	1958.98	0.61181	979.995	51.6459	0
	High	LTTPTYGDLNHLVSLTMSGVTTcLR	6	1	1	A1ZBL0	C23(Carbamidomethyl)	0	1800177686	0	3.698e-14	107.22	2.94938e-10	2	2750.38	-2.29476	1375.69	124.839	0
	High	GHYTEGAELVDSVLDVVRK	6	2	2	CON_00697107.2;A1ZBL0		0	10475230084	0	1.824e-14	104.94	6.26826e-10	2	2087.08	-0.068778	1044.04	94.7375	1
	High	ALTVPELTQQMFDAK	6	2	2	A1ZBL0;A0A0B4LGH1		0	3831176908	0	2.365e-08	95.18	4.94524e-09	2	1691.87	0.785311	846.438	51.0248	0
	High	MSATFIGNSTAIQELFK	8	4	3	CON_00697107.2;A1ZBL0;Q8MST5		0	1775842968	0	3.57e-09	90.57	1.35058e-08	2	1857.94	-0.67068	929.474	113.286	0
	High	IMNTYSVVPSPK	11	2	2	A1ZBL0;A0A0B4LGH1		0	1506681376	0	3.095e-07	79.23	1.65367e-07	2	1335.7	0.860102	668.353	33.9744	0
	High	AVLVDLEPGTMDSVR	2	1	1	A1ZBL0		0	4135254074	0	2.159e-07	76.84	3.7159e-07	2	1601.82	-1.5686	801.413	87.6895	0
	High	SGPFGQIFRPDNFVFGQSGAGNNWAK	5	2	2	CON_00697107.2;A1ZBL0		0	9173992396	0	3.262e-12	75.65	2.96774e-07	3	2798.35	1.18806	933.454	52.5141	1
	High	EAEScDcLQGFQLTHSLGGGTGSGMGTLLISK	3	1	1	A1ZBL0	C5(Carbamidomethyl); C7(Carbamidomethyl)	0	1.95574e+09	0	1.774e-13	70.26	9.98403e-07	3	3311.54	0.523793	1104.52	104.614	0
	High	ALTVPELTQQmFDAK	2	2	2	A1ZBL0;A0A0B4LGH1	M11(Oxidation)	0	222412022	0	7.505e-08	70.22	1.74436e-06	2	1707.87	1.96847	854.436	42.9232	0
	High	RISEQFTAMFR	8	4	3	CON_00697107.2;Q8MST5;A1ZBL0		0	971052672	0	8.216e-08	66.51	2.74729e-06	2	1385.7	0.359003	693.354	36.3296	1
	High	EVDEQMLNIQNK	5	1	1	A1ZBL0		0	1589320873	0	5.946e-07	66.27	2.69095e-06	2	1460.71	0.809921	730.857	34.2382	0
	High	INVYYNEASGGK	3	1	1	A1ZBL0		0	5663451594	0	1.304e-05	64.75	3.08168e-06	2	1314.63	0.744809	657.82	27.367	0
	High	ImNTYSVVPSPK	1	2	2	A1ZBL0;A0A0B4LGH1	M2(Oxidation)	0	3.11685e+07	0	5.575e-07	64.4	4.66555e-06	2	1351.69	0.638269	676.35	53.6793	0
	High	TAVcDIPPRGLK	12	2	2	CON_00697107.2;A1ZBL0	C4(Carbamidomethyl)	0	172613408	0	1.677e-06	59.93	1.07214e-05	2	1326.72	1.64933	663.865	25.9481	1
	High	AVLVDLEPGTmDSVR	3	1	1	A1ZBL0	M11(Oxidation)	0	8.15143e+08	0	1.31e-07	59.22	1.89683e-05	2	1617.82	0.760049	809.412	40.0373	0
	High	TAVcDIPPR	10	2	2	CON_00697107.2;A1ZBL0	C4(Carbamidomethyl)	0	157906532	0	8.109e-05	58.09	1.11772e-05	2	1028.52	-0.0589118	514.763	24.4697	0
	High	NSSYFVEWIPNNVK	6	5	4	CON_00697107.2;Q8MST5;A1ZBL0;A0A0B4LGH1		0	5550698672	0	3.412e-06	54.98	4.71766e-05	2	1696.83	0.10383	848.92	97.0171	0
	High	VSDTVVEPYNATLSVHQLVENTDETYcIDNEALYDIcFR	2	2	2	CON_00697107.2;A1ZBL0	C27(Carbamidomethyl); C37(Carbamidomethyl)	0	1.95298e+06	0	3.802e-09	54.8	2.10268e-05	4	4593.1	-2.40254	1149.03	132.363	0
	High	FPGQLNADLRK	9	7	5	CON_00697107.2;CON_00713000.3;Q8MST5;A1ZBL0;A0A0B4LGH1		0	1833838866	0	3.391e-07	53.62	8.36432e-05	2	1258.69	0.228854	629.849	28.0246	1
	High	YLTVAAIFR	8	2	2	CON_00697107.2;A1ZBL0		0	3040240624	0	0.0006293	52.58	3.45048e-05	2	1053.61	0.924175	527.309	46.6711	0
	High	LAVNMVPFPR	3	7	5	CON_00697107.2;CON_00713000.3;Q8MST5;A1ZBL0;A0A0B4LGH1		0	4319253188	0	4.12e-05	52.12	8.40854e-05	2	1143.63	0.0574596	572.321	43.4357	0
	High	NMMAAcDPR	2	3	3	CON_00697107.2;A1ZBL0;A0A0B4LGH1	C6(Carbamidomethyl)	0	253251391	0	0.0001113	48.9	1.93237e-05	2	1065.43	0.0305353	533.217	22.4948	0
	High	LHFFmPGFAPLTSR	3	3	3	CON_00697107.2;A1ZBL0;A0A0B4LGH1	M5(Oxidation)	0	3.03362e+08	0	2.718e-08	48.24	0.000248948	3	1636.83	-0.252942	546.282	86.9758	0
	High	LHFFMPGFAPLTSR	5	3	3	CON_00697107.2;A1ZBL0;A0A0B4LGH1		0	2628626741	0	6.363e-07	47.33	0.000260747	3	1620.84	0.147012	540.95	49.1895	0
	High	EVDEQmLNIQNK	2	1	1	A1ZBL0	M6(Oxidation)	0	182595215	0	1.743e-06	46.76	0.000203483	2	1476.7	0.690074	738.854	27.8631	0
	High	IREEYPDRIMNTYSVVPSPK	4	2	2	A1ZBL0;A0A0B4LGH1		0	1487664568	0	1.813e-07	45.71	0.000377291	2	2394.21	0.979824	1197.61	70.4468	2
	High	IREEYPDR	3	7	5	CON_00697107.2;CON_00713000.3;Q8MST5;A1ZBL0;A0A0B4LGH1		0	423397177	0	0.001808	39.14	0.00148717	2	1077.53	0.00457672	539.27	16.8485	1
	High	FPGQLNADLR	1	7	5	CON_00697107.2;CON_00713000.3;Q8MST5;A1ZBL0;A0A0B4LGH1		0	1.60546e+07	0	1.487e-05	28.47	0.023824	2	1130.6	1.5498	565.802	64.6471	0
	High	IREEYPDRImNTYSVVPSPK	1	2	2	A1ZBL0;A0A0B4LGH1	M10(Oxidation)	0	2.8654e+07	0	1.766e-06	25.46	0.0436625	4	2410.2	-1.03049	603.307	61.2052	2
	High	LTTPTYGDLNHLVSLTMSGVTTcLRFPGQLNADLRK	2	1	1	A1ZBL0	C23(Carbamidomethyl)	0	563863479	0	2.949e-09	12.82	0.493664	4	3990.06	0.434492	998.27	58.5392	2
CON_00697107.2	SWISS-PROT:Q6B856|ENSEMBL:ENSBTAP00000005346 (Bos taurus) Gene_Symbol=TUBB2A Tubulin beta-2B chain	3354.79	8.39997e+09	105	48.99	1	2	18	445	49.9209	4.89404
	A2	Sequence	# PSMs	# Proteins	# Protein Groups	Protein Group Accessions	Modifications	ΔCn	Area	q-Value	PEP	IonScore	Exp Value	Charge	MH+ [Da]	ΔM [ppm]	m/z [Da]	RT [min]	# Missed Cleavages
	High	MREIVHIQAGQcGNQIGAK	5	1	1	CON_00697107.2	C12(Carbamidomethyl)	0	964716186	0	1.491e-14	114.63	6.33604e-11	2	2110.07	1.59871	1055.54	46.0039	1
	High	GHYTEGAELVDSVLDVVR	4	2	2	CON_00697107.2;A1ZBL0		0	358072270	0	3.887e-13	113.18	1.07468e-10	2	1958.98	0.61181	979.995	51.6459	0
	High	GHYTEGAELVDSVLDVVRK	6	2	2	CON_00697107.2;A1ZBL0		0	10475230084	0	1.824e-14	104.94	6.26826e-10	2	2087.08	-0.068778	1044.04	94.7375	1
	High	MSATFIGNSTAIQELFK	8	4	3	CON_00697107.2;A1ZBL0;Q8MST5		0	1775842968	0	3.57e-09	90.57	1.35058e-08	2	1857.94	-0.67068	929.474	113.286	0
	High	SGPFGQIFRPDNFVFGQSGAGNNWAK	5	2	2	CON_00697107.2;A1ZBL0		0	9173992396	0	3.262e-12	75.65	2.96774e-07	3	2798.35	1.18806	933.454	52.5141	1
	High	RISEQFTAMFR	8	4	3	CON_00697107.2;Q8MST5;A1ZBL0		0	971052672	0	8.216e-08	66.51	2.74729e-06	2	1385.7	0.359003	693.354	36.3296	1
	High	TAVcDIPPRGLK	12	2	2	CON_00697107.2;A1ZBL0	C4(Carbamidomethyl)	0	172613408	0	1.677e-06	59.93	1.07214e-05	2	1326.72	1.64933	663.865	25.9481	1
	High	TAVcDIPPR	10	2	2	CON_00697107.2;A1ZBL0	C4(Carbamidomethyl)	0	157906532	0	8.109e-05	58.09	1.11772e-05	2	1028.52	-0.0589118	514.763	24.4697	0
	High	NSSYFVEWIPNNVK	6	5	4	CON_00697107.2;Q8MST5;A1ZBL0;A0A0B4LGH1		0	5550698672	0	3.412e-06	54.98	4.71766e-05	2	1696.83	0.10383	848.92	97.0171	0
	High	VSDTVVEPYNATLSVHQLVENTDETYcIDNEALYDIcFR	2	2	2	CON_00697107.2;A1ZBL0	C27(Carbamidomethyl); C37(Carbamidomethyl)	0	1.95298e+06	0	3.802e-09	54.8	2.10268e-05	4	4593.1	-2.40254	1149.03	132.363	0
	High	FPGQLNADLRK	9	7	5	CON_00697107.2;CON_00713000.3;Q8MST5;A1ZBL0;A0A0B4LGH1		0	1833838866	0	3.391e-07	53.62	8.36432e-05	2	1258.69	0.228854	629.849	28.0246	1
	High	EIVHIQAGQcGNQIGAK	1	1	1	CON_00697107.2	C10(Carbamidomethyl)	0	1.24567e+08	0	1.208e-07	52.62	0.000102292	3	1822.92	0.212659	608.313	47.5517	0
	High	YLTVAAIFR	8	2	2	CON_00697107.2;A1ZBL0		0	3040240624	0	0.0006293	52.58	3.45048e-05	2	1053.61	0.924175	527.309	46.6711	0
	High	LAVNMVPFPR	3	7	5	CON_00697107.2;CON_00713000.3;Q8MST5;A1ZBL0;A0A0B4LGH1		0	4319253188	0	4.12e-05	52.12	8.40854e-05	2	1143.63	0.0574596	572.321	43.4357	0
	High	mREIVHIQAGQcGNQIGAK	3	1	1	CON_00697107.2	M1(Oxidation); C12(Carbamidomethyl)	0	164229814	0	4.148e-08	50.84	0.000127329	3	2126.06	1.33096	709.359	24.061	1
	High	NMMAAcDPR	2	3	3	CON_00697107.2;A1ZBL0;A0A0B4LGH1	C6(Carbamidomethyl)	0	253251391	0	0.0001113	48.9	1.93237e-05	2	1065.43	0.0305353	533.217	22.4948	0
	High	LHFFmPGFAPLTSR	3	3	3	CON_00697107.2;A1ZBL0;A0A0B4LGH1	M5(Oxidation)	0	3.03362e+08	0	2.718e-08	48.24	0.000248948	3	1636.83	-0.252942	546.282	86.9758	0
	High	LHFFMPGFAPLTSR	5	3	3	CON_00697107.2;A1ZBL0;A0A0B4LGH1		0	2628626741	0	6.363e-07	47.33	0.000260747	3	1620.84	0.147012	540.95	49.1895	0
	High	IREEYPDR	3	7	5	CON_00697107.2;CON_00713000.3;Q8MST5;A1ZBL0;A0A0B4LGH1		0	423397177	0	0.001808	39.14	0.00148717	2	1077.53	0.00457672	539.27	16.8485	1
	High	FPGQLNADLR	1	7	5	CON_00697107.2;CON_00713000.3;Q8MST5;A1ZBL0;A0A0B4LGH1		0	1.60546e+07	0	1.487e-05	28.47	0.023824	2	1130.6	1.5498	565.802	64.6471	0
	High	mREIVHIQAGQcGNQIGAK	1	1	1	CON_00697107.2	N-Term(Acetyl); M1(Oxidation); C12(Carbamidomethyl)	0	1.08238e+08	0.001	0.0434	2.2	9.21916	4	2168.07	-0.252107	542.773	33.3836	1
C7LA75	Heat shock protein cognate 4, isoform G OS=Drosophila melanogaster OX=7227 GN=Hsc70-4 PE=1 SV=1 - [C7LA75_DROME]	7415.59	7.19734e+09	228	81.87	4	47	52	651	71.0874	5.51611
	A2	Sequence	# PSMs	# Proteins	# Protein Groups	Protein Group Accessions	Modifications	ΔCn	Area	q-Value	PEP	IonScore	Exp Value	Charge	MH+ [Da]	ΔM [ppm]	m/z [Da]	RT [min]	# Missed Cleavages
	High	QTQTFTTYSDNQPGVLIQVYEGER	7	2	1	C7LA75		0	439843418	0	1.948e-12	158.82	1.72554e-15	2	2774.33	-0.231345	1387.67	102.397	0
	High	SINPDEAVAYGAAVQAAILHGDK	5	2	1	C7LA75		0	6354035654	0	6.031e-12	131.78	9.35878e-13	3	2310.17	0.827353	770.73	52.4648	0
	High	WLDANQLADKEEYEHR	5	1	1	C7LA75		0	1835616792	0	1.427e-12	124.79	2.60537e-12	2	2016.94	0.915937	1008.98	59.5806	1
	High	RTLSSSTQASIEIDSLFEGTDFYTSITR	15	1	1	C7LA75		0	35547215	0	2.473e-12	115.38	4.07077e-11	3	3125.53	2.14731	1042.52	131.222	1
	High	IINEPTAAAIAYGLDK	5	4	2	C7LA75;F3YDH0		0	8225094844	0	2.664e-10	103.21	7.49721e-10	3	1659.9	0.812881	553.97	44.2525	0
	High	APAVGIDLGTTYScVGVFQHGK	7	1	1	C7LA75	C14(Carbamidomethyl)	0	1.82055e+09	0	3.399e-13	99.82	1.44882e-09	3	2277.14	0.861942	759.717	44.3005	0
	High	NQVAmNPTQTIFDAK	3	1	1	C7LA75	M5(Oxidation)	0	505103212	0	5.207e-09	99.7	1.35011e-09	2	1693.82	-0.658984	847.414	35.3228	0
	High	KFDDAAVQSDMK	4	1	1	C7LA75		0	397755100	0	3.905e-09	97.87	1.25745e-09	2	1354.63	0.243472	677.819	23.7545	1
	High	STAGDTHLGGEDFDNR	4	2	1	C7LA75		0	574276736	0	2.422e-10	94.79	5.31031e-10	2	1691.72	-0.521513	846.366	25.0115	0
	High	IINEPTAAAIAYGLDKK	4	3	2	C7LA75;F3YDH0		0	1.70717e+09	0	6.061e-13	93	5.63836e-09	3	1787.99	0.311268	596.668	38.5944	1
	High	NQVAMNPTQTIFDAK	2	1	1	C7LA75		0	2120934880	0	1.245e-07	91.82	8.81262e-09	2	1677.83	0.451063	839.417	39.9531	0
	High	TVTNAVITVPAYFNDSQR	5	1	1	C7LA75		0	2812654456	0	2.47e-10	91.54	9.3995e-09	2	1996.02	1.45476	998.512	91.1528	0
	High	GVPQIEVTFDIDANGILNVTALER	38	1	1	C7LA75		0	1.00443e+07	0	8.053e-12	89.62	1.62625e-08	3	2584.36	-0.46876	862.125	69.9485	0
	High	ARFEELNADLFR	4	2	1	C7LA75		0	3.94413e+09	0	2.944e-08	82.94	8.20677e-08	2	1480.75	-0.206233	740.881	39.7893	1
	High	FEELNADLFR	2	2	1	C7LA75		0	299302864	0	2.996e-06	78.01	1.84215e-07	2	1253.62	0.77514	627.312	45.1577	0
	High	ELEGVcNPIITK	9	1	1	C7LA75	C6(Carbamidomethyl)	0	4722976404	0	9.71e-07	74.75	5.64417e-07	2	1372.71	0.276706	686.861	36.3195	0
	High	FDDAAVQSDMK	2	1	1	C7LA75		0	630561064	0	1.858e-07	74.44	1.18717e-07	2	1226.54	0.36785	613.772	28.6885	0
	High	NVLIFDLGGGTFDVSILSIDDGIFEVK	3	1	1	C7LA75		0	0	0	3.154e-07	73.91	6.13729e-07	3	2883.51	1.8448	961.841	72.1795	0
	High	ETAEAYLGK	2	2	2	C7LA75;F3YDH0		0	2679184660	0	4.632e-05	73.62	4.1713e-07	2	981.489	0.212876	491.248	24.9139	0
	High	TTPSYVAFTDTERLIGDAAK	4	3	1	C7LA75		0	2214045084	0	4.238e-10	72.79	7.54835e-07	2	2156.08	-1.07459	1078.55	93.8655	1
	High	HWPFEVVSADGKPK	6	1	1	C7LA75		0	7012878944	0	4.578e-09	71.23	1.05093e-06	2	1596.82	1.27505	798.913	33.0555	1
	High	TFFPEEISSMVLTK	7	1	1	C7LA75		0	1719972434	0	2.609e-07	66.35	2.90833e-06	3	1628.82	0.168019	543.613	112.534	0
	High	VEIIANDQGNRTTPSYVAFTDTER	1	3	1	C7LA75		0	0	0	2.487e-09	64.03	5.02116e-06	3	2697.31	0.221199	899.776	77.2967	1
	High	LLQDLFNGK	2	1	1	C7LA75		0	3417910656	0	5.88e-05	63.53	5.2124e-06	2	1047.58	0.281088	524.295	41.4747	0
	High	WLDANQLADKEEYEHRQK	5	1	1	C7LA75		0	1425836688	0	2.055e-10	63.02	6.11133e-06	4	2273.1	0.323928	569.029	28.4838	2
	High	FELSGIPPAPR	11	2	1	C7LA75		0	534935488	0	2.44e-06	62.86	5.9266e-06	2	1183.65	0.386294	592.327	76.8832	0
	High	FDDAAVQSDmK	1	1	1	C7LA75	M10(Oxidation)	0	2.55352e+07	0	5.913e-08	62.73	9.33336e-07	2	1242.53	0.525837	621.769	34.4243	0
	High	TTPSYVAFTDTER	3	3	1	C7LA75		0	3779553604	0	1.901e-05	61.56	6.17936e-06	2	1487.7	-0.143777	744.354	35.3274	0
	High	SVIHDIVLVGGSTR	6	1	1	C7LA75		0	4461690967	0	1.073e-07	58.95	1.03791e-05	2	1452.82	0.484061	726.912	35.7343	0
	High	KTFFPEEISSMVLTK	3	1	1	C7LA75		0	1.63271e+08	0	9.424e-06	57.24	2.92639e-05	2	1756.92	1.2755	878.964	93.0997	1
	High	DAGTIAGLNVLR	4	2	1	C7LA75		0	4846196816	0	7.222e-07	57.17	2.46549e-05	2	1199.68	1.4518	600.342	44.3886	0
	High	IEVTYKDEK	3	1	1	C7LA75		0	926352192	0	0.0002914	56.93	2.21017e-05	2	1124.58	0.325928	562.796	19.1926	1
	High	ISDSDRTTILDK	4	1	1	C7LA75		0	4121550080	0	1.248e-05	56.71	2.86895e-05	2	1363.71	0.310483	682.357	23.6515	1
	High	VEIIANDQGNR	2	4	2	C7LA75;F3YDH0		0	1928009948	0	1.759e-05	56.25	3.04722e-05	2	1228.63	0.296483	614.818	38.1634	0
	High	NQVAMNPTQTIFDAKR	2	1	1	C7LA75		0	74450758	0	7.11e-06	56.01	4.77414e-05	3	1833.93	-0.451654	611.98	64.4148	1
	High	IEVTYKDEKK	2	1	1	C7LA75		0	101757549	0	1.999e-05	54.07	4.01535e-05	2	1252.68	-0.973657	626.842	20.0335	2
	High	ATLDEDNLK	3	1	1	C7LA75		0	1644363517	0	0.002186	53.82	6.59777e-05	2	1018.51	1.01212	509.757	23.6976	0
	High	LVTHFVQEFK	4	1	1	C7LA75		0	645867952	0	1.2e-06	53.01	7.00048e-05	2	1247.68	0.538101	624.343	30.9149	0
	High	KFDDAAVQSDmK	1	1	1	C7LA75	M11(Oxidation)	0	9142994	0	2.446e-08	49.2	5.83098e-05	2	1370.63	0.12096	685.817	26.3067	1
	High	HWPFEVVSADGK	1	1	1	C7LA75		0	2.04135e+07	0	4.069e-06	43.61	0.000459465	2	1371.67	-0.715049	686.338	73.2855	0
	High	LIGDAAK	1	4	2	C7LA75;F3YDH0		0	2.77732e+08	0	0.006442	43.31	8.86653e-05	2	687.404	0.445048	344.206	16.7781	0
	High	NGLESYcFNMK	2	1	1	C7LA75	C7(Carbamidomethyl)	0	3.03928e+08	0	1.636e-05	39.08	0.000222471	2	1362.58	0.162543	681.795	37.1194	0
	High	DNNLLGKFELSGIPPAPR	3	1	1	C7LA75		0	28243999	0	1.253e-08	38.88	0.00135891	3	1938.05	0.580522	646.687	49.9131	1
	High	DNNLLGK	1	2	1	C7LA75		0	175046908	0	0.008117	34.31	0.00285424	2	773.415	0.0497362	387.211	22.7277	0
	High	RNTTIPTK	4	3	1	C7LA75		0	424146458	0	0.006796	34.19	0.0078309	2	930.536	-0.340393	465.772	8.85116	1
	High	EDIERMVNEAEK	2	1	1	C7LA75		0	0	0	0.007064	32.58	0.00466505	2	1462.69	1.37117	731.847	31.3199	1
	High	WLDANQLADK	1	1	1	C7LA75		0	2.56692e+08	0	0.000324	30.99	0.00756351	2	1173.59	0.70258	587.299	64.8148	0
	High	VEIIANDQGNRTTPSYVAFTDTERLIGDAAK	2	3	1	C7LA75		0	49371151	0	6.029e-10	20.89	0.119354	4	3365.69	-0.777981	842.179	97.4458	2
	High	MVNEAEK	1	1	1	C7LA75		0	6.47774e+06	0	0.001598	20.53	0.0442558	2	820.386	-0.857197	410.697	6.64179	0
	High	GRLSKEDIER	1	3	1	C7LA75		0	37789656	0	0.0006782	20.14	0.197045	3	1202.65	-0.434238	401.554	18.744	2
	High	STAGDTHLGGEDFDNRLVTHFVQEFK	3	1	1	C7LA75		0	5410504570	0	7.896e-09	16.73	0.227187	3	2920.39	-0.211993	974.133	92.7357	1
	High	STMDPVEK	1	1	1	C7LA75		0	7.53693e+07	0	0.006755	4.99	1.8225	2	906.423	-0.681799	453.715	27.0336	0
	High	LYQGAGFPPGGMPGGPGGmPGAAGAAGAAGAGGAGPTIEEVD	2	1	1	C7LA75	M19(Oxidation)	0	0	0	9.992e-06	3.51	2.7185	3	3611.65	-1.33061	1204.55	110.168	0
	High	ITITNDK	1	4	1	C7LA75		0	622238970	0.002	0.06879	1.75	6.68344	2	804.447	0.711803	402.727	17.7164	0
	High	STmDPVEK	1	1	1	C7LA75	M3(Oxidation)	0	844006	0.004	0.1449	17.97	0.0829857	2	922.419	0.277072	461.713	15.7428	0
	High	ALRDAKLDK	1	3	1	C7LA75		0	1.49927e+07	0.008	0.3192	17.5	0.219618	2	1029.6	-0.623068	515.306	14.0025	2
CON_Trypsin	Trypsin - Sus scrofa (Pig). - [SWISS-PROT:P00761|TRYP_PIG]	874.489	6055087927	25	25.11	1	5	5	231	24.3938	7.18115
	A2	Sequence	# PSMs	# Proteins	# Protein Groups	Protein Group Accessions	Modifications	ΔCn	Area	q-Value	PEP	IonScore	Exp Value	Charge	MH+ [Da]	ΔM [ppm]	m/z [Da]	RT [min]	# Missed Cleavages
	High	LGEHNIDVLEGNEQFINAAK	3	1	1	CON_Trypsin		0	7496559971	0	1.746e-12	113.15	6.97208e-11	3	2211.11	0.753821	737.707	41.8534	0
	High	IITHPNFNGNTLDNDImLIK	3	1	1	CON_Trypsin	M17(Oxidation)	0	3.59683e+08	0	8.444e-11	94.72	5.04245e-09	3	2299.18	0.295818	767.063	43.6729	0
	High	IITHPNFNGNTLDNDIMLIK	4	1	1	CON_Trypsin		0	5322261706	0	1.932e-11	83.69	6.62722e-08	3	2283.18	0.342998	761.732	45.6677	0
	High	IITHPNFNGNTLDNDIMLIKLSSPATLNSR	1	1	1	CON_Trypsin		0	8.51271e+07	0	1.11e-12	69.25	1.53317e-06	4	3309.73	0.173421	828.187	49.7682	1
	High	LSSPATLNSR	2	1	1	CON_Trypsin		0	4650376816	0	6.742e-05	54.43	5.26445e-05	2	1045.56	0.190397	523.286	23.0752	0
	High	VATVSLPR	12	1	1	CON_Trypsin		0	5346442104	0	0.00507	47.85	0.000152575	2	842.51	0.695617	421.759	27.222	0
A0A0B4LJ12	Nucleoside diphosphate kinase OS=Drosophila melanogaster OX=7227 GN=awd PE=1 SV=1 - [A0A0B4LJ12_DROME]	1023.83	5956825497	36	77.78	4	10	10	153	17.1589	8.11865
	A2	Sequence	# PSMs	# Proteins	# Protein Groups	Protein Group Accessions	Modifications	ΔCn	Area	q-Value	PEP	IonScore	Exp Value	Charge	MH+ [Da]	ΔM [ppm]	m/z [Da]	RT [min]	# Missed Cleavages
	High	QMLGATNPADSLPGTIR	3	2	1	A0A0B4LJ12		0	1773086598	0	4.631e-12	100.08	1.91441e-09	2	1741.89	-0.733506	871.448	79.4762	0
	High	NIIHGSDAVESAEK	4	2	1	A0A0B4LJ12		0	6.84542e+09	0	1.88e-11	99.15	1.277e-09	2	1469.72	0.124445	735.365	22.3702	0
	High	QmLGATNPADSLPGTIR	2	2	1	A0A0B4LJ12	M2(Oxidation)	0	51504902	0	1.752e-10	83.22	7.9564e-08	2	1757.89	3.06858	879.449	71.4897	0
	High	ELVTWTPAAK	2	2	1	A0A0B4LJ12		0	6.3226e+09	0	0.0018	57.68	3.80456e-05	2	1115.61	0.833563	558.309	35.1568	0
	High	GDFcIQVGR	8	4	1	A0A0B4LJ12	C4(Carbamidomethyl)	0	4702452202	0	0.0003047	54.02	4.33924e-05	2	1051.5	0.420302	526.253	34.0789	0
	High	ERTFIMVKPDGVQR	5	2	1	A0A0B4LJ12		0	2.22937e+09	0	3.772e-06	51	0.000129476	4	1675.9	0.793391	419.73	27.9083	2
	High	EIALWFNEK	4	2	1	A0A0B4LJ12		0	3688151752	0	0.0002063	41.21	0.00108984	2	1149.59	0.193555	575.301	45.9164	0
	High	TFIMVKPDGVQR	2	2	1	A0A0B4LJ12		0	2.80518e+08	0	0.000943	38.92	0.00141056	3	1390.75	2.15981	464.256	30.8296	1
	High	IIERFEQK	3	2	1	A0A0B4LJ12		0	1849758668	0	0.0007927	38.83	0.00191141	2	1062.6	1.04764	531.801	21.117	1
	High	ERTFImVKPDGVQR	1	2	1	A0A0B4LJ12	M6(Oxidation)	0	4.38405e+07	0	0.001094	37.68	0.00275532	4	1691.89	-1.76417	423.727	42.7468	2
	High	HYADLSARPFFPGLVNYMNSGPVVPMVWEGLNVVK	1	2	1	A0A0B4LJ12		0	1077760891	0	6.028e-10	20.59	0.130073	4	3903.96	-1.66876	976.747	63.9226	1
	High	TGRQMLGATNPADSLPGTIR	1	2	1	A0A0B4LJ12		0	5.13936e+06	0	4.938e-05	9.83	1.52348	3	2056.06	1.78535	686.026	66.9119	1
M9PBL3	HSP 82 OS=Drosophila melanogaster OX=7227 GN=Hsp83 PE=3 SV=1 - [M9PBL3_DROME]	6527.42	5.52822e+09	210	69.87	2	51	54	717	81.8142	5.021
	A2	Sequence	# PSMs	# Proteins	# Protein Groups	Protein Group Accessions	Modifications	ΔCn	Area	q-Value	PEP	IonScore	Exp Value	Charge	MH+ [Da]	ΔM [ppm]	m/z [Da]	RT [min]	# Missed Cleavages
	High	NNDDEQYVWESSAGGSFTVR	12	1	1	M9PBL3		0	187944889	0	3.085e-11	120.18	2.25459e-12	2	2260.97	0.0802898	1130.99	128.968	0
	High	GVVDSEDLPLNISR	4	3	2	M9PBL3;A1Z6L9		0	5896430748	0	5.68e-08	106.95	2.53305e-10	2	1513.79	1.1771	757.397	43.2989	0
	High	LVDSPccIVTSQFGWSANMER	9	1	1	M9PBL3	C6(Carbamidomethyl); C7(Carbamidomethyl)	0	224822694	0	4.187e-13	106.23	1.35792e-10	2	2457.1	-1.30079	1229.05	106.913	0
	High	LVDSPccIVTSQFGWSANmER	2	1	1	M9PBL3	C6(Carbamidomethyl); C7(Carbamidomethyl); M19(Oxidation)	0	93950908	0	3.451e-11	104.31	1.89047e-10	2	2473.08	-3.97475	1237.05	99.8703	0
	High	PIWTRNPDDISQEEYGEFYK	3	1	1	M9PBL3		0	1591782746	0	5.51e-12	102.94	4.29395e-10	2	2487.15	1.04219	1244.08	85.2329	1
	High	EIFLRELISNASDALDK	7	2	2	M9PBL3;Q9VAY2		0	773359479	0	2.852e-09	101.6	1.21416e-09	2	1934.02	-0.0178294	967.515	108.961	1
	High	DLVILLFETSLLSSGFSLDSPQVHASR	1	1	1	M9PBL3		0	81870481	0	1.823e-13	97.99	2.14454e-09	3	2931.55	-0.118598	977.854	70.5042	0
	High	TAGTLTIIDTGIGMTK	6	1	1	M9PBL3		0	1726879238	0	4.18e-09	96.42	3.29509e-09	2	1592.86	0.626656	796.932	46.3147	0
	High	FHTSASGDDFcSLADYVSR	5	1	1	M9PBL3	C11(Carbamidomethyl)	0	5.3164e+09	0	5.442e-14	95.77	7.9455e-10	2	2134.92	3.92862	1067.96	83.1472	0
	High	QLEINPDHPIVETLR	4	1	1	M9PBL3		0	3529117206	0	2.841e-10	92.48	8.41756e-09	2	1773.95	0.308617	887.479	38.4327	0
	High	KEmETDEPKIEDVGEDEDADKK	3	1	1	M9PBL3	M3(Oxidation)	0	619378299	0	1.56e-13	90.38	5.13083e-09	3	2566.14	0.082117	856.05	22.3816	3
	High	RVFIMDNcEDLIPEYLNFMK	3	1	1	M9PBL3	C8(Carbamidomethyl)	0	3.95805e+08	0	5.162e-11	89.23	1.02086e-08	3	2547.21	0.570655	849.741	58.5845	1
	High	EMETDEPKIEDVGEDEDADKK	5	1	1	M9PBL3		0	6.70311e+08	0	1.819e-11	85.14	7.04252e-09	2	2422.04	-1.37721	1211.52	49.9995	2
	High	ELISNASDALDK	4	2	2	M9PBL3;Q9VAY2		0	4977445800	0	5.921e-06	84.88	5.51023e-08	2	1275.65	4.78189	638.328	32.8109	0
	High	SLTNDWEDHLAVK	6	2	1	M9PBL3		0	4156075972	0	2.218e-08	80.11	8.92116e-08	2	1527.75	0.773307	764.376	36.5038	0
	High	GFEVVYMTEPIDEYVIQHLK	2	1	1	M9PBL3		0	847179249	0	8.007e-11	78.46	2.22395e-07	3	2410.2	0.39855	804.072	59.4659	0
	High	ARGFEVVYMTEPIDEYVIQHLK	5	1	1	M9PBL3		0	1840885974	0	5.825e-14	75.64	4.77571e-07	3	2637.34	-0.0274451	879.784	53.6396	1
	High	TMELIEELTEDK	8	1	1	M9PBL3		0	7.13641e+08	0	1.278e-07	74.32	4.14208e-07	2	1450.7	0.797628	725.853	98.9354	0
	High	SDLVNNLGTIAK	3	1	1	M9PBL3		0	5044575542	0	4.573e-06	73.88	6.38447e-07	2	1244.68	0.347736	622.846	37.0136	0
	High	NPDDISQEEYGEFYK	2	1	1	M9PBL3		0	8.78206e+08	0	3.664e-07	70.44	2.25912e-07	2	1833.78	0.731353	917.395	39.323	0
	High	EmETDEPKIEDVGEDEDADKK	5	1	1	M9PBL3	M2(Oxidation)	0	800450842	0	3.716e-11	69.9	3.88851e-07	3	2438.04	0.636902	813.352	25.712	2
	High	HSQFIGYPIK	5	1	1	M9PBL3		0	5371822224	0	4.933e-06	69.01	2.64394e-06	2	1189.64	0.777884	595.322	28.7599	0
	High	RTPFDLFENQK	4	1	1	M9PBL3		0	1564806376	0	1.539e-07	68.11	2.60375e-06	2	1394.71	0.171554	697.857	38.8522	1
	High	TAGTLTIIDTGIGmTK	2	1	1	M9PBL3	M14(Oxidation)	0	54114398	0	8.384e-09	66.91	2.62778e-06	2	1608.85	0.0632305	804.929	41.9797	0
	High	TKPIWTRNPDDISQEEYGEFYK	5	1	1	M9PBL3		0	3.32014e+09	0	5.403e-11	65.02	4.80032e-06	2	2716.29	-0.0608705	1358.65	75.9221	2
	High	KFYDQFSK	2	1	1	M9PBL3		0	491932794	0	0.0002192	64.14	4.68356e-06	2	1062.53	-0.0593645	531.766	24.3614	1
	High	KTMELIEELTEDK	2	1	1	M9PBL3		0	60025752	0	2.556e-08	62.81	8.40379e-06	2	1578.79	0.965314	789.901	41.1188	1
	High	DQVSNSAFVER	6	1	1	M9PBL3		0	2785683723	0	0.0008417	62.4	5.00633e-06	2	1251.6	0.212518	626.302	27.9588	0
	High	IRYESLTDPSK	4	2	1	M9PBL3		0	3353751542	0	3.334e-06	61.07	1.28969e-05	2	1308.68	0.403414	654.844	25.2139	1
	High	EKYTEDEELNK	4	1	1	M9PBL3		0	336188799	0	4.146e-06	60.03	6.95181e-06	2	1397.64	-1.32248	699.324	19.0922	1
	High	EDQTDYLEESK	3	1	1	M9PBL3		0	1293681888	0	2.451e-05	58.42	3.597e-06	2	1356.58	0.851498	678.794	45.6592	0
	High	EGLELPEDESEK	2	1	1	M9PBL3		0	624802920	0	6.539e-07	57.9	8.43341e-06	2	1374.63	0.142318	687.817	58.3451	0
	High	HVYFITGESK	8	1	1	M9PBL3		0	5181109680	0	2.223e-06	57.19	2.04354e-05	2	1180.6	0.764218	590.804	25.133	0
	High	SILDNKVEK	3	1	1	M9PBL3		0	1886864980	0	9.188e-05	55.38	4.88202e-05	2	1045.59	0.177466	523.298	20.8691	1
	High	AQALRDTATMGYMAGK	2	1	1	M9PBL3		0	165206263	0	5.368e-06	55.19	3.42041e-05	2	1684.82	3.40024	842.914	49.7064	1
	High	KQLEINPDHPIVETLR	2	1	1	M9PBL3		0	4.63508e+07	0	6.796e-10	54.81	4.08006e-05	3	1902.05	0.40949	634.687	60.5667	1
	High	AQALRDTATMGYMAGKK	3	1	1	M9PBL3		0	83874972	0	5.282e-10	53.99	5.74596e-05	3	1812.91	0.627951	604.975	39.8849	2
	High	AQALRDTATmGYMAGK	3	1	1	M9PBL3	M10(Oxidation)	0	87646240	0	6.506e-05	51.82	4.6036e-05	2	1700.81	0.25742	850.909	40.1522	1
	High	IRYESLTDPSKLDSGK	3	2	1	M9PBL3		0	1.36301e+08	0	1.13e-07	51.18	0.000121933	2	1808.94	1.254	904.974	52.5932	2
	High	YTEDEELNK	2	1	1	M9PBL3		0	210749691	0	8.235e-05	48.63	8.15675e-05	2	1140.51	0.517151	570.757	20.5044	0
	High	TPFDLFENQK	2	1	1	M9PBL3		0	1.46007e+08	0	2.238e-06	47.51	0.000189838	2	1238.61	0.525801	619.807	44.2004	0
	High	QLVSVTK	2	1	1	M9PBL3		0	7.79461e+08	0	0.007145	45.85	0.00016381	2	774.473	0.736602	387.74	29.2404	0
	High	VFIMDNcEDLIPEYLNFMK	1	1	1	M9PBL3	C7(Carbamidomethyl)	0	133309047	0	9.29e-09	45.09	0.000278768	3	2391.11	1.31625	797.708	65.5539	0
	High	LGVHEDSNNR	4	1	1	M9PBL3		0	1.16814e+08	0	4.195e-06	43.22	0.000302534	2	1140.54	0.500834	570.774	12.673	0
	High	RTPFDLFENQKK	3	1	1	M9PBL3		0	6.92304e+08	0	2.242e-07	42.08	0.000978717	3	1522.8	0.569603	508.272	57.8126	2
	High	AKFESLcK	3	1	1	M9PBL3	C7(Carbamidomethyl)	0	740284944	0	0.001076	40.47	0.000919865	2	982.503	0.49373	491.755	17.7741	1
	High	FYDQFSK	3	1	1	M9PBL3		0	2456047919	0	0.004399	36.42	0.00128839	2	934.432	1.10747	467.719	27.8567	0
	High	LGLGIDEDEPMTTDDAQSAGDAPSLVEDTEDASHmEEVD	2	1	1	M9PBL3	M35(Oxidation)	0	1.03369e+07	0	3.158e-10	36.38	0.000276173	3	4120.72	0.617626	1374.24	114.272	0
	High	GFEVVYmTEPIDEYVIQHLK	1	1	1	M9PBL3	M7(Oxidation)	0	7.82022e+06	0	2.795e-07	35.03	0.00452233	3	2426.19	-0.401228	809.403	113.877	0
	High	GVVDSEDLPLNISREmLQQNK	1	1	1	M9PBL3	M16(Oxidation)	0	8.61914e+07	0	3.985e-07	32.27	0.00975362	3	2401.2	-0.191391	801.072	81.1423	1
	High	LGLGIDEDEPmTTDDAQSAGDAPSLVEDTEDASHmEEVD	1	1	1	M9PBL3	M11(Oxidation); M35(Oxidation)	0	0	0	1.454e-10	31.26	0.00074817	3	4136.71	0.280497	1379.57	108.678	0
	High	EGLELPEDESEKK	3	1	1	M9PBL3		0	41812433	0	3.655e-07	30.73	0.00895996	2	1502.72	0.536818	751.865	27.0551	1
	High	HFSVEGQLEFR	6	2	1	M9PBL3		0	1.19966e+07	0	0.0002409	30.7	0.016427	3	1348.67	1.0951	450.227	76.9692	0
	High	EMLQQNK	1	1	1	M9PBL3		0	0	0	0.004284	23.33	0.0599225	2	890.44	0.181759	445.724	13.714	0
	High	ADNSEPLGR	1	1	1	M9PBL3		0	97409219	0	0.0008275	22.04	0.0275076	2	958.459	0.263698	479.733	22.7118	0
	High	AQALRDTATmGYmAGKK	1	1	1	M9PBL3	M10(Oxidation); M13(Oxidation)	0	7.37877e+06	0	4.733e-06	21.81	0.0959098	3	1844.9	-0.38783	615.638	26.1065	2
	High	TPFDLFENQKK	1	1	1	M9PBL3		0	0	0	0.0001864	16.09	0.357983	3	1366.7	0.333219	456.238	66.763	1
	High	LGVHEDSNNRAK	3	1	1	M9PBL3		0	4.08184e+07	0	0.0002033	8.92	1.44903	4	1339.67	0.0344299	335.673	7.27083	1
	High	AQALRDTATMGYmAGKK	1	1	1	M9PBL3	M13(Oxidation)	0	56327999	0	4.862e-05	5.74	3.41358	3	1828.9	-0.134675	610.306	21.0336	2
	High	ALLFIPR	3	1	1	M9PBL3		0	3640142256	0.001	0.01276	39.22	0.000879604	2	829.53	0.0557897	415.268	41.4786	0
	High	TKPIWTR	2	2	1	M9PBL3		0	335513774	0.001	0.02798	36.69	0.00401792	2	901.526	0.527112	451.267	19.5636	1
	High	ALLFIPRR	1	1	1	M9PBL3		0	56949260	0.001	0.03928	21.21	0.0264892	3	985.631	0.482262	329.215	32.2958	1
CON_00700865.3	ENSEMBL:ENSBTAP00000016242 (Bos taurus) similar to alpha-tubulin I isoform 1	2197.87	4.77647e+09	67	33.92	2	16	16	451	50.1476	5.05908
	A2	Sequence	# PSMs	# Proteins	# Protein Groups	Protein Group Accessions	Modifications	ΔCn	Area	q-Value	PEP	IonScore	Exp Value	Charge	MH+ [Da]	ΔM [ppm]	m/z [Da]	RT [min]	# Missed Cleavages
	High	FDGALNVDLTEFQTNLVPYPR	7	2	1	CON_00700865.3		0	8.82375e+08	0	1.122e-11	119.54	1.83436e-11	3	2409.21	0.73053	803.742	61.0599	0
	High	AVcMLSNTTAIAEAWAR	9	2	1	CON_00700865.3	C3(Carbamidomethyl)	0	390733309	0	3.43e-11	115.6	4.06249e-11	2	1864.91	0.955704	932.957	101.21	0
	High	QLFHPEQLITGKEDAANNYAR	4	2	1	CON_00700865.3		0	1298222696	0	2.729e-09	96.89	3.17199e-09	4	2415.21	0.800232	604.557	36.3219	1
	High	AYHEQLSVAEITNAcFEPANQMVK	5	2	1	CON_00700865.3	C15(Carbamidomethyl)	0	572072468	0	2.993e-14	94.31	4.22576e-09	2	2750.29	-1.71132	1375.65	89.4247	0
	High	LDHKFDLMYAK	4	2	1	CON_00700865.3		0	999359301	0	2.904e-08	73.86	6.27003e-07	2	1380.7	0.939465	690.853	29.8736	1
	High	NLDIERPTYTNLNR	4	2	1	CON_00700865.3		0	5905064488	0	7.524e-08	69.26	1.79644e-06	2	1718.88	0.169015	859.945	32.5028	1
	High	QLFHPEQLITGK	4	2	1	CON_00700865.3		0	2108916870	0	2.016e-07	63.08	5.78146e-06	2	1410.78	1.60296	705.892	36.9322	0
	High	AVcmLSNTTAIAEAWAR	1	2	1	CON_00700865.3	C3(Carbamidomethyl); M4(Oxidation)	0	6.61751e+06	0	9.213e-09	58.61	2.0245e-05	2	1880.91	4.55965	940.958	87.9835	0
	High	DVNAAIATIK	5	2	1	CON_00700865.3		0	5037648144	0	6.175e-05	54.82	4.35085e-05	2	1015.58	0.183614	508.293	34.2308	0
	High	VGINYQPPTVVPGGDLAK	6	2	1	CON_00700865.3		0	3386683099	0	3.615e-09	53.24	6.40227e-05	3	1824.99	0.967955	609.001	43.173	0
	High	FDLMYAK	2	2	1	CON_00700865.3		0	734283300	0	0.00275	50.25	5.94758e-05	2	887.434	0.438358	444.22	65.729	0
	High	EDAANNYAR	1	2	1	CON_00700865.3		0	2.61812e+07	0	1.756e-05	48.25	5.0872e-05	2	1023.45	-0.624793	512.228	18.2123	0
	High	AYHEQLSVAEITNAcFEPANQmVK	1	2	1	CON_00700865.3	C15(Carbamidomethyl); M22(Oxidation)	0	31464953	0	1.331e-08	42.45	0.000455082	3	2766.28	-1.83177	922.765	81.8209	0
	High	GHYTIGK	3	2	1	CON_00700865.3		0	525716630	0	0.0002986	39.84	0.000918213	2	775.41	0.215851	388.209	8.11759	0
	High	LSVDYGKK	3	2	1	CON_00700865.3		0	3.56068e+08	0	0.004526	32.1	0.00391538	2	909.505	0.910469	455.256	23.96	1
	High	FDLmYAK	2	2	1	CON_00700865.3	M4(Oxidation)	0	7.47555e+07	0	0.003081	26.57	0.0138784	2	903.429	0.519278	452.218	54.9954	0
	High	RNLDIERPTYTNLNR	3	2	1	CON_00700865.3		0	220700508	0	1.796e-07	24.52	0.058805	3	1874.98	0.253565	625.666	27.6991	2
	High	LDHKFDLMYAKR	1	2	1	CON_00700865.3		0	5.80286e+06	0	9.233e-05	21.26	0.120455	4	1536.8	-0.0769967	384.955	43.702	2
	High	LDHKFDLmYAK	1	2	1	CON_00700865.3	M8(Oxidation)	0	7.68164e+07	0	6.053e-05	18	0.182263	3	1396.7	1.80673	466.237	44.4318	1
	High	LSVDYGK	1	2	1	CON_00700865.3		0	896571766	0.001	0.02733	48.35	3.36301e-05	2	781.41	0.590167	391.208	23.2751	0
X2JH42	ATP synthase subunit beta OS=Drosophila melanogaster OX=7227 GN=ATPsynbeta PE=1 SV=1 - [X2JH42_DROME]	3275.1	4.6849e+09	91	80	3	30	30	505	54.0744	5.2749
	A2	Sequence	# PSMs	# Proteins	# Protein Groups	Protein Group Accessions	Modifications	ΔCn	Area	q-Value	PEP	IonScore	Exp Value	Charge	MH+ [Da]	ΔM [ppm]	m/z [Da]	RT [min]	# Missed Cleavages
	High	TAAIHAEAPEFVQMSVEQEILVTGIK	3	2	1	X2JH42		0	259706572	0	1.977e-13	111.46	1.02887e-10	3	2811.46	-1.07775	937.824	53.7972	0
	High	TIAMDGTEGLVR	2	2	1	X2JH42		0	1109377264	0	5.088e-07	104.56	4.88174e-10	2	1262.64	0.327663	631.824	35.225	0
	High	VALVYGQMNEPPGAR	4	2	1	X2JH42		0	770699188	0	1.239e-10	104.45	6.94514e-10	2	1601.81	0.274305	801.409	67.9344	0
	High	SLQDIIAILGMDELSEEDKLTVAR	2	3	1	X2JH42		0	2.67986e+08	0	1.658e-13	102.13	9.58328e-10	3	2659.39	0.0914952	887.134	66.4841	1
	High	IMDPNIIGQEHYNVAR	4	2	1	X2JH42		0	1736309248	0	8.128e-11	102.06	7.80987e-10	2	1869.93	-0.0713754	935.467	67.5949	0
	High	AIAELGIYPAVDPLDSTSR	5	2	1	X2JH42		0	2.96186e+09	0	3.775e-10	99.39	1.5766e-09	2	1988.04	3.20582	994.524	108.185	0
	High	AHGGYSVFAGVGER	8	2	1	X2JH42		0	601167884	0	3.132e-10	89.38	1.65521e-08	2	1406.68	0.346151	703.844	29.1946	0
	High	FLSQPFQVAEVFTGHAGK	6	2	1	X2JH42		0	4528975488	0	2.342e-11	86.68	2.93179e-08	3	1963.01	-0.31804	655.007	97.4985	0
	High	FTQAGSEVSALLGR	3	3	1	X2JH42		0	1719312350	0	7.549e-08	86.27	4.00101e-08	2	1435.76	1.80957	718.382	42.0745	0
	High	EGNDLYNEMIEGGVISLK	1	2	1	X2JH42		0	44743546	0	1.954e-09	85.92	3.00634e-08	2	1980.95	-1.76668	990.981	113.914	0
	High	KGSITSVQAIYVPADDLTDPAPATTFAHLDATTVLSR	3	2	1	X2JH42		0	3.7026e+08	0	1.199e-15	83.6	5.19454e-08	4	3842.98	-1.05328	961.5	52.7931	1
	High	IPSAVGYQPTLATDMGSMQER	2	2	1	X2JH42		0	231394064	0	1.505e-12	80.89	9.16542e-08	2	2252.07	-0.885103	1126.54	87.8583	0
	High	VVDLLAPYAK	2	2	1	X2JH42		0	2405099371	0	9.715e-06	77.77	1.62931e-07	2	1088.64	1.7813	544.822	77.2717	0
	High	TVLIMELINNVAK	9	2	1	X2JH42		0	8.25863e+08	0	1.96e-08	73.61	4.59465e-07	2	1457.84	-0.867582	729.423	121.808	0
	High	GSITSVQAIYVPADDLTDPAPATTFAHLDATTVLSR	7	2	1	X2JH42		0	1.06004e+08	0	1.765e-13	70.37	1.05608e-06	3	3714.89	1.16472	1238.97	122.629	0
	High	LVLEVAQHLGENTVR	4	2	1	X2JH42		0	2334154032	0	7.736e-10	67.25	2.0626e-06	2	1677.93	-0.539676	839.467	72.8424	0
	High	SLQDIIAILGMDELSEEDK	1	3	1	X2JH42		0	5.7398e+07	0	1.492e-10	64.83	3.09121e-06	3	2119.05	-0.648185	707.02	70.0847	0
	High	IINVIGEPIDERGPIDTDK	4	2	1	X2JH42		0	5516689916	0	5.558e-09	63.04	8.91383e-06	2	2094.1	-2.1595	1047.56	80.2186	1
	High	SLQDIIAILGmDELSEEDK	1	3	1	X2JH42	M11(Oxidation)	0	4.43197e+07	0	9.119e-11	59.47	1.36705e-05	3	2135.04	0.594863	712.353	66.1508	0
	High	VALVYGQmNEPPGAR	1	2	1	X2JH42	M8(Oxidation)	0	0	0	4.389e-07	50.76	0.000104932	2	1617.81	0.622932	809.407	56.3106	0
	High	IGLFGGAGVGK	2	3	1	X2JH42		0	1061351680	0	1.21e-05	49.41	0.000161517	2	975.561	-1.1455	488.284	36.5063	0
	High	TREGNDLYNEMIEGGVISLK	1	2	1	X2JH42		0	923821764	0	6.49e-10	46.86	0.000377095	3	2238.1	-1.43169	746.706	47.8536	1
	High	FTQAGSEVSALLGRIPSAVGYQPTLATDMGSMQER	1	2	1	X2JH42		0	9.78416e+07	0	7.376e-11	45.89	0.000428957	4	3668.81	1.04809	917.958	119.831	1
	High	VLDTGYPIR	1	2	1	X2JH42		0	69587996	0	0.006464	40.08	0.00138426	2	1033.57	0.436868	517.288	56.4505	0
	High	VALTGLTVAEYFRDQEGQDVLLFIDNIFR	1	2	1	X2JH42		0	58200376	0	2.397e-11	39.61	0.00166828	4	3342.74	-0.091619	836.44	70.3973	1
	High	LVPLEQTIK	1	2	1	X2JH42		0	2.23502e+09	0	0.0009355	39.28	0.000424915	2	1040.64	0.925037	520.822	58.6311	0
	High	IVAVIGAVVDVQFDDNLPPILNALEVDNRSPR	4	2	1	X2JH42		0	32648764	0	1.683e-08	37.68	0.000895693	4	3458.86	-1.47669	865.47	69.9885	1
	High	VLDTGYPIRIPVGAETLGR	3	2	1	X2JH42		0	4009027611	0	5.719e-07	34.76	0.00259001	3	2027.13	0.758577	676.382	45.4765	1
	High	VALTGLTVAEYFR	1	2	1	X2JH42		0	0	0	6.615e-07	32.79	0.005944	2	1439.79	2.20641	720.4	51.2797	0
	High	IINVIGEPIDER	1	2	1	X2JH42		0	118951876	0	0.0008592	27.16	0.0202886	2	1367.75	0.978801	684.381	40.2401	0
	High	TIAmDGTEGLVR	1	2	1	X2JH42	M4(Oxidation)	0	0	0	0.002524	25.97	0.0333867	2	1278.63	-2.28692	639.82	50.539	0
	High	IPVGAETLGR	1	2	1	X2JH42		0	8.3759e+07	0	0.006248	23.54	0.0312025	2	1012.58	0.692259	506.793	49.9153	0
	High	NLLPFLGQLSR	1	1	1	X2JH42		0	6917184	0.001	0.01606	16	0.276308	2	1257.73	-2.19126	629.368	107.456	0
A0A0B4LGH1	Tubulin beta chain OS=Drosophila melanogaster OX=7227 GN=betaTub60D PE=1 SV=1 - [A0A0B4LGH1_DROME]	2197.89	4.56704e+09	76	51.21	1	8	18	453	50.7455	4.88135
	A2	Sequence	# PSMs	# Proteins	# Protein Groups	Protein Group Accessions	Modifications	ΔCn	Area	q-Value	PEP	IonScore	Exp Value	Charge	MH+ [Da]	ΔM [ppm]	m/z [Da]	RT [min]	# Missed Cleavages
	High	GHYTEGAELVDNVLDVVRK	4	1	1	A0A0B4LGH1		0	949247442	0	1.705e-14	129.2	2.32037e-12	3	2114.09	0.688342	705.368	44.8477	1
	High	ALTVPELTQQMFDAK	6	2	2	A1ZBL0;A0A0B4LGH1		0	3831176908	0	2.365e-08	95.18	4.94524e-09	2	1691.87	0.785311	846.438	51.0248	0
	High	MSSTFIGNTTAIQELFK	3	1	1	A0A0B4LGH1		0	226568576	0	3.91e-08	88.13	2.49181e-08	2	1887.95	-0.886807	944.479	114.201	0
	High	SGPYGQLFRPDNFVYGQSGAGNNWAK	3	1	1	A0A0B4LGH1		0	799293096	0	3.262e-13	86.59	2.83968e-08	2	2830.33	-0.435444	1415.67	93.3567	1
	High	IMNTYSVVPSPK	11	2	2	A1ZBL0;A0A0B4LGH1		0	1506681376	0	3.095e-07	79.23	1.65367e-07	2	1335.7	0.860102	668.353	33.9744	0
	High	ALTVPELTQQmFDAK	2	2	2	A1ZBL0;A0A0B4LGH1	M11(Oxidation)	0	222412022	0	7.505e-08	70.22	1.74436e-06	2	1707.87	1.96847	854.436	42.9232	0
	High	EcENcDcLQGFQLTHSLGGGTGSGMGTLLISK	1	1	1	A0A0B4LGH1	C2(Carbamidomethyl); C5(Carbamidomethyl); C7(Carbamidomethyl)	0	172827370	0	4.218e-14	65.93	1.65926e-06	3	3427.55	2.48896	1143.19	103.928	0
	High	ImNTYSVVPSPK	1	2	2	A1ZBL0;A0A0B4LGH1	M2(Oxidation)	0	3.11685e+07	0	5.575e-07	64.4	4.66555e-06	2	1351.69	0.638269	676.35	53.6793	0
	High	YLTVAAVFR	2	1	1	A0A0B4LGH1		0	302340387	0	4.564e-05	60.13	6.30831e-06	2	1039.6	1.66521	520.301	42.6601	0
	High	NSSYFVEWIPNNVK	6	5	4	CON_00697107.2;Q8MST5;A1ZBL0;A0A0B4LGH1		0	5550698672	0	3.412e-06	54.98	4.71766e-05	2	1696.83	0.10383	848.92	97.0171	0
	High	FPGQLNADLRK	9	7	5	CON_00697107.2;CON_00713000.3;Q8MST5;A1ZBL0;A0A0B4LGH1		0	1833838866	0	3.391e-07	53.62	8.36432e-05	2	1258.69	0.228854	629.849	28.0246	1
	High	LAVNMVPFPR	3	7	5	CON_00697107.2;CON_00713000.3;Q8MST5;A1ZBL0;A0A0B4LGH1		0	4319253188	0	4.12e-05	52.12	8.40854e-05	2	1143.63	0.0574596	572.321	43.4357	0
	High	AILLDLEPGTMESVR	3	1	1	A0A0B4LGH1		0	3.63523e+08	0	9.881e-08	51.16	0.000124409	2	1643.87	0.208095	822.438	49.6604	0
	High	NMMAAcDPR	2	3	3	CON_00697107.2;A1ZBL0;A0A0B4LGH1	C6(Carbamidomethyl)	0	253251391	0	0.0001113	48.9	1.93237e-05	2	1065.43	0.0305353	533.217	22.4948	0
	High	LHFFmPGFAPLTSR	3	3	3	CON_00697107.2;A1ZBL0;A0A0B4LGH1	M5(Oxidation)	0	3.03362e+08	0	2.718e-08	48.24	0.000248948	3	1636.83	-0.252942	546.282	86.9758	0
	High	LHFFMPGFAPLTSR	5	3	3	CON_00697107.2;A1ZBL0;A0A0B4LGH1		0	2628626741	0	6.363e-07	47.33	0.000260747	3	1620.84	0.147012	540.95	49.1895	0
	High	IREEYPDRIMNTYSVVPSPK	4	2	2	A1ZBL0;A0A0B4LGH1		0	1487664568	0	1.813e-07	45.71	0.000377291	2	2394.21	0.979824	1197.61	70.4468	2
	High	EVDEQMLAVQNK	1	1	1	A0A0B4LGH1		0	1.70734e+08	0	1.069e-05	41.66	0.000859747	2	1403.69	3.86919	702.348	55.2985	0
	High	IREEYPDR	3	7	5	CON_00697107.2;CON_00713000.3;Q8MST5;A1ZBL0;A0A0B4LGH1		0	423397177	0	0.001808	39.14	0.00148717	2	1077.53	0.00457672	539.27	16.8485	1
	High	mSSTFIGNTTAIQELFK	1	1	1	A0A0B4LGH1	M1(Oxidation)	0	0	0	5.263e-06	37.84	0.00276254	2	1903.95	-0.260248	952.477	53.4171	0
	High	FPGQLNADLR	1	7	5	CON_00697107.2;CON_00713000.3;Q8MST5;A1ZBL0;A0A0B4LGH1		0	1.60546e+07	0	1.487e-05	28.47	0.023824	2	1130.6	1.5498	565.802	64.6471	0
	High	IREEYPDRImNTYSVVPSPK	1	2	2	A1ZBL0;A0A0B4LGH1	M10(Oxidation)	0	2.8654e+07	0	1.766e-06	25.46	0.0436625	4	2410.2	-1.03049	603.307	61.2052	2
	High	TAVcDIPPK	1	1	1	A0A0B4LGH1	C4(Carbamidomethyl)	0	7.02529e+07	0	0.0004445	17.65	0.134856	2	1000.51	-0.746147	500.76	37.2479	0
F3YDH0	Heat shock 70-kDa protein cognate 3, isoform E OS=Drosophila melanogaster OX=7227 GN=Hsc70-3 PE=1 SV=1 - [F3YDH0_DROME]	4482.9	4.40449e+09	126	62.04	1	40	45	656	72.2165	5.36377
	A2	Sequence	# PSMs	# Proteins	# Protein Groups	Protein Group Accessions	Modifications	ΔCn	Area	q-Value	PEP	IonScore	Exp Value	Charge	MH+ [Da]	ΔM [ppm]	m/z [Da]	RT [min]	# Missed Cleavages
	High	IINEPTAAAIAYGLDK	5	4	2	C7LA75;F3YDH0		0	8225094844	0	2.664e-10	103.21	7.49721e-10	3	1659.9	0.812881	553.97	44.2525	0
	High	NGRVEIIANDQGNR	4	1	1	F3YDH0		0	327309300	0	5.724e-10	102.81	7.27805e-10	2	1555.8	1.10193	778.401	21.0363	1
	High	IEIESFFEGDDFSETLTR	5	1	1	F3YDH0		0	2.06531e+07	0	3.812e-10	93.05	3.31952e-09	2	2134.98	-1.43237	1067.99	127.146	0
	High	IINEPTAAAIAYGLDKK	4	3	2	C7LA75;F3YDH0		0	1.70717e+09	0	6.061e-13	93	5.63836e-09	3	1787.99	0.311268	596.668	38.5944	1
	High	NQLTTNPENTVFDAK	3	1	1	F3YDH0		0	2052534530	0	3.32e-08	83.97	5.29144e-08	2	1691.83	1.20451	846.416	34.9639	0
	High	SQVFSTASDNQHTVTIQVYEGERPMTK	2	1	1	F3YDH0		0	162076260	0	1.915e-10	82.54	7.15984e-08	4	3053.47	1.63853	764.123	67.5253	1
	High	KVTHAVVTVPAYFNDAQR	4	1	1	F3YDH0		0	885187980	0	8.211e-11	82.08	8.20759e-08	2	2016.07	0.604698	1008.54	56.6333	1
	High	IVITNDQNR	2	1	1	F3YDH0		0	760531558	0	5.672e-05	79.58	1.52012e-07	2	1072.57	0.379899	536.791	20.4481	0
	High	NSKPHISVDTSQGAK	6	1	1	F3YDH0		0	230913663	0	1.309e-10	77.57	2.2748e-07	3	1568.8	0.581816	523.606	16.2758	1
	High	FEELNLDLFR	3	1	1	F3YDH0		0	1466767508	0	9.98e-06	75.77	3.56223e-07	2	1295.66	-0.34426	648.335	53.2943	0
	High	VFAPEEISAMVLGK	4	1	1	F3YDH0		0	1099149890	0	2.024e-07	75.6	4.35168e-07	3	1490.79	1.22943	497.603	111.48	0
	High	EWSDTNVQHDIK	4	1	1	F3YDH0		0	7.55742e+08	0	3.846e-06	75.35	2.1589e-07	3	1471.68	0.681745	491.232	43.8368	0
	High	ITPSYVAFTADGER	2	1	1	F3YDH0		0	1633748992	0	2.248e-06	74.18	3.85764e-07	2	1526.75	1.26057	763.879	38.1987	0
	High	ETAEAYLGK	2	2	2	C7LA75;F3YDH0		0	2679184660	0	4.632e-05	73.62	4.1713e-07	2	981.489	0.212876	491.248	24.9139	0
	High	ITPSYVAFTADGERLIGDAAK	2	1	1	F3YDH0		0	1211853440	0	5.293e-11	71.92	1.47175e-06	2	2195.14	0.864077	1098.07	95.1694	1
	High	PHISVDTSQGAK	4	1	1	F3YDH0		0	631016364	0	3.9e-08	69.51	1.36012e-06	2	1239.63	0.704475	620.32	18.3527	0
	High	ELGTVIGIDLGTTYScVGVYK	2	1	1	F3YDH0	C16(Carbamidomethyl)	0	0	0	1.84e-10	69.06	1.90594e-06	2	2245.14	0.431467	1123.08	126.83	0
	High	VLEDADMNKK	3	1	1	F3YDH0		0	134489256	0	5.367e-06	68.31	1.93318e-06	2	1162.58	0.102253	581.792	17.6864	1
	High	WLEQNPDADPEEYK	1	1	1	F3YDH0		0	6.98285e+07	0	1.115e-09	63.27	1.53068e-06	2	1733.76	-0.401014	867.386	66.4206	0
	High	DAGVIAGLQVMR	2	1	1	F3YDH0		0	222832720	0	5.355e-06	62.57	1.12053e-05	2	1229.67	0.50494	615.338	45.2643	0
	High	LYQGAGGAPPPEGGDDADLK	1	1	1	F3YDH0		0	1.4065e+07	0	1.256e-10	61.42	1.3665e-05	2	1927.9	-1.55877	964.454	54.4784	0
	High	LYQGAGGAPPPEGGDDADLKDEL	4	1	1	F3YDH0		0	917339122	0	4.641e-11	61.39	9.07632e-06	2	2285.06	1.70556	1143.03	77.9617	1
	High	DLEAIVQPVIAK	2	1	1	F3YDH0		0	2309183888	0	7.537e-06	61.23	3.16409e-06	2	1295.76	1.88747	648.383	94.587	0
	High	ETAEAYLGKK	1	1	1	F3YDH0		0	53645776	0	6.031e-06	61.13	1.11781e-05	2	1109.59	1.78414	555.297	19.6829	1
	High	VTHAVVTVPAYFNDAQR	3	1	1	F3YDH0		0	430616640	0	1.472e-07	59.46	2.07795e-05	3	1887.97	1.70507	629.996	35.7041	0
	High	LESAIDESIK	2	1	1	F3YDH0		0	312198129	0	1.46e-05	58.59	2.31747e-05	2	1104.58	0.611809	552.793	29.1908	0
	High	DVHEIVLVGGSTR	6	1	1	F3YDH0		0	540476002	0	5.894e-06	58.41	1.9108e-05	2	1381.74	0.518854	691.376	32.802	0
	High	ERVESRNELESYAYSLK	5	1	1	F3YDH0		0	921618648	0	2.962e-08	56.9	2.95031e-05	3	2073.03	0.747219	691.68	32.1405	2
	High	VEIIANDQGNR	2	4	2	C7LA75;F3YDH0		0	1928009948	0	1.759e-05	56.25	3.04722e-05	2	1228.63	0.296483	614.818	38.1634	0
	High	WLEQNPDADPEEYKK	4	1	1	F3YDH0		0	1.67609e+09	0	1.263e-07	55.89	1.63596e-05	2	1861.86	-1.22538	931.433	53.4717	1
	High	FDLTGIPPAPR	5	1	1	F3YDH0		0	622338492	0	4.501e-06	53.23	5.44259e-05	2	1183.65	0.386294	592.327	82.69	0
	High	AKFEELNLDLFR	2	1	1	F3YDH0		0	7.57461e+07	0	1.89e-06	51.09	9.72546e-05	3	1494.8	1.42132	498.937	46.2885	1
	High	STLKPVQK	2	1	1	F3YDH0		0	1.01674e+08	0	0.0004656	48.17	0.000144023	2	900.552	0.526467	450.78	6.74158	1
	High	LTPEDIDR	2	1	1	F3YDH0		0	832806520	0	0.001266	46.92	0.000132103	2	958.485	0.769454	479.746	26.9423	0
	High	LIGDAAK	1	4	2	C7LA75;F3YDH0		0	2.77732e+08	0	0.006442	43.31	8.86653e-05	2	687.404	0.445048	344.206	16.7781	0
	High	ALSGSHQVR	1	1	1	F3YDH0		0	650716	0	0.0003655	41.66	0.000648222	2	954.512	0.247335	477.76	2.86667	0
	High	RLIGREWSDTNVQHDIK	3	1	1	F3YDH0		0	633148288	0	4.089e-07	38.83	0.00212742	4	2067.07	0.727776	517.524	26.1968	2
	High	NELESYAYSLK	1	1	1	F3YDH0		0	520791720	0	1.481e-05	38.77	0.00129421	2	1316.64	1.75177	658.823	71.8468	0
	High	NTVIPTKK	1	1	1	F3YDH0		0	129251610	0	0.0008065	37.21	0.00179652	2	900.551	0.0520405	450.779	14.7288	1
	High	DNHLLGKFDLTGIPPAPR	2	1	1	F3YDH0		0	7.82454e+06	0	0.0004487	33.69	0.00572934	4	1961.06	-0.29889	491.02	85.9418	1
	High	DFFGGKEPSR	2	1	1	F3YDH0		0	173863945	0	0.001517	32	0.00583636	2	1139.55	2.53575	570.279	26.151	1
	High	IVITNDQNRLTPEDIDR	1	1	1	F3YDH0		0	77601958	0	3.041e-05	29.59	0.0173643	3	2012.04	-0.513539	671.351	34.2929	1
	High	DNHLLGK	2	1	1	F3YDH0		0	4.1534e+08	0	0.004709	29.43	0.00193842	2	796.432	0.368918	398.719	15.6128	0
	High	KDVHEIVLVGGSTR	6	1	1	F3YDH0		0	122842380	0	1.755e-05	22.04	0.0665809	3	1509.84	0.284482	503.951	36.5756	1
	High	VMDHFIK	1	1	1	F3YDH0		0	6.63141e+07	0	0.005803	17.81	0.229324	2	889.459	-0.836632	445.233	34.6769	0
M9PJN8	Glyceraldehyde-3-phosphate dehydrogenase OS=Drosophila melanogaster OX=7227 GN=Gapdh2 PE=3 SV=1 - [M9PJN8_DROME]	5058.94	4.29321e+09	120	84.64	3	22	22	332	35.3473	8.44092
	A2	Sequence	# PSMs	# Proteins	# Protein Groups	Protein Group Accessions	Modifications	ΔCn	Area	q-Value	PEP	IonScore	Exp Value	Charge	MH+ [Da]	ΔM [ppm]	m/z [Da]	RT [min]	# Missed Cleavages
	High	GILGYTDEEVVSTDFLSDTHSSVFDAK	33	1	1	M9PJN8		0	1547196184	0	1.451e-10	114.92	2.43191e-11	2	2932.37	0.253677	1466.69	117.76	0
	High	VVSNAScTTNcLAPLAK	5	1	1	M9PJN8	C7(Carbamidomethyl); C11(Carbamidomethyl)	0	4487218368	0	1.716e-11	112.08	9.50842e-11	2	1805.89	0.589552	903.448	31.9223	0
	High	VINDNFEIVEGLMTTVHATTATQK	23	1	1	M9PJN8		0	2372367216	0	3.407e-13	107.21	2.62349e-10	3	2632.33	-0.43324	878.114	129.543	0
	High	GANVVAVNDPFIDVNYMVYLFK	2	1	1	M9PJN8		0	6.5522e+08	0	2.257e-12	99.52	1.7814e-09	3	2488.26	-1.07464	830.09	69.073	0
	High	VPTPNVSVVDLTVR	3	1	1	M9PJN8		0	2432940028	0	1.508e-08	91.32	4.72259e-09	2	1495.85	0.738926	748.428	44.093	0
	High	ITVFSERDPANINWASAGAEYIVESTGVFTTIDK	4	1	1	M9PJN8		0	5.25942e+08	0	7.104e-14	91.17	1.10756e-08	4	3701.83	0.0344613	926.214	64.5484	1
	High	LISWYDNEFGYSNR	14	2	1	M9PJN8		0	3929009844	0	3.146e-08	88.1	9.91243e-09	2	1763.8	0.0660693	882.405	47.5245	0
	High	GTVAAEGGFLVVNGQK	5	1	1	M9PJN8		0	625503089	0	7.08e-08	87.07	3.05303e-08	2	1546.82	-2.15404	773.913	70.6015	0
	High	LTGMAFRVPTPNVSVVDLTVR	5	1	1	M9PJN8		0	3708493648	0	1.078e-08	76.42	2.07511e-07	2	2272.25	-0.0998246	1136.63	105.781	1
	High	IGINGFGR	2	1	1	M9PJN8		0	1051528790	0	0.0003406	69.3	1.27476e-06	2	833.464	1.84983	417.236	31.6643	0
	High	AGISLNDK	2	1	1	M9PJN8		0	416871420	0	0.0004834	62.32	9.58336e-06	2	817.442	1.04844	409.225	21.8	0
	High	VQEAANGPLK	1	1	1	M9PJN8		0	446175312	0	4.728e-05	62.18	6.59822e-06	2	1026.56	1.3252	513.783	18.6937	0
	High	GAAQNIIPASTGAAK	5	2	1	M9PJN8		0	4463413400	0	1.036e-06	60.99	1.0151e-05	2	1369.74	0.694337	685.376	27.9059	0
	High	KVIISAPSADAPMFVcGVNLDAYKPDMK	2	1	1	M9PJN8	C16(Carbamidomethyl)	0	436267988	0	7.31e-14	58.14	2.49375e-05	3	3037.52	0.0109325	1013.18	97.6686	2
	High	VIPALNGK	2	1	1	M9PJN8		0	1600110616	0	0.005222	47.79	3.90902e-05	2	811.505	1.03741	406.256	24.8264	0
	High	VIISAPSADAPmFVcGVNLDAYKPDMK	1	1	1	M9PJN8	M12(Oxidation); C15(Carbamidomethyl)	0	3.91307e+06	0	5.966e-08	38.39	0.0019486	3	2925.43	1.99968	975.813	102.516	1
	High	VIISAPSADAPMFVcGVNLDAYKPDMK	2	1	1	M9PJN8	C15(Carbamidomethyl)	0	4.09168e+08	0	1.069e-08	32.42	0.0113127	3	2909.43	2.9901	970.483	52.2848	1
	High	LTGmAFRVPTPNVSVVDLTVR	1	1	1	M9PJN8	M4(Oxidation)	0	1.93546e+08	0	3.194e-10	31.86	0.00762405	3	2288.25	1.02362	763.42	98.0466	1
	High	LTGMAFR	2	3	1	M9PJN8		0	502597225	0	0.004473	26.81	0.00792107	2	795.419	0.356202	398.213	45.6374	0
	High	DGRGAAQNIIPASTGAAK	1	2	1	M9PJN8		0	289997506	0	1.325e-06	22.27	0.104058	3	1697.89	0.118576	566.636	45.8892	1
	High	LISWYDNEFGYSNRVIDLIK	1	1	1	M9PJN8		0	252703006	0	3.537e-07	20.63	0.166074	3	2445.25	0.672686	815.754	115.84	1
	High	FDSTHGRFK	1	1	1	M9PJN8		0	2.18139e+07	0	0.0005321	19.3	0.121014	3	1094.54	0.421527	365.518	13.7662	1
	High	VPTPNVSVVDLTVRLGK	1	1	1	M9PJN8		0	1.76347e+06	0	3.95e-06	14.72	0.172017	3	1794.05	-0.179173	598.688	90.5169	1
	High	GASYDEIK	2	1	1	M9PJN8		0	2.26359e+08	0.001	0.04145	30.8	0.00345182	2	882.421	0.789653	441.714	28.9464	0
M9PBK5	Ribosomal protein LP1, isoform B OS=Drosophila melanogaster OX=7227 GN=RpLP1 PE=3 SV=1 - [M9PBK5_DROME]	2366.45	4.10042e+09	51	74.11	1	6	6	112	11.5058	4.41162
	A2	Sequence	# PSMs	# Proteins	# Protein Groups	Protein Group Accessions	Modifications	ΔCn	Area	q-Value	PEP	IonScore	Exp Value	Charge	MH+ [Da]	ΔM [ppm]	m/z [Da]	RT [min]	# Missed Cleavages
	High	AELAcVYASLILVDDDVAVTGEK	34	1	1	M9PBK5	C5(Carbamidomethyl)	0	2.20612e+08	0	3.87e-13	125.78	4.46567e-12	2	2451.23	-1.8866	1226.12	129.853	0
	High	DLITNIGSGVGAAPAGGAAPAAAAAAPAAESKK	3	1	1	M9PBK5		0	9.26454e+08	0	2.223e-18	118.97	2.0219e-11	3	2846.5	0.377636	949.505	41.9706	1
	High	DLITNIGSGVGAAPAGGAAPAAAAAAPAAESK	4	1	1	M9PBK5		0	3.13421e+09	0	4.795e-18	113.07	5.94274e-11	2	2718.42	3.74554	1359.71	95.3723	0
	High	AANVEVEPYWPGLFAK	5	1	1	M9PBK5		0	5596307514	0	2.596e-09	75.93	4.10985e-07	3	1790.91	1.2653	597.643	52.666	0
	High	DLITNIGSGVGAAPAGGAAPAAAAAAPAAESKKEEK	3	1	1	M9PBK5		0	2.2949e+09	0	1.08e-13	47.06	0.000276488	4	3232.68	0.537839	808.926	75.7624	2
	High	ALEGINVK	2	1	1	M9PBK5		0	3570731820	0	0.004716	37.16	0.00164424	2	843.494	0.609155	422.251	41.5505	0
X2JF59	Thioredoxin peroxidase 1, isoform C OS=Drosophila melanogaster OX=7227 GN=Jafrac1 PE=1 SV=1 - [X2JF59_DROME]	2015.25	3.95411e+09	49	72.16	1	17	17	194	21.724	5.70654
	A2	Sequence	# PSMs	# Proteins	# Protein Groups	Protein Group Accessions	Modifications	ΔCn	Area	q-Value	PEP	IonScore	Exp Value	Charge	MH+ [Da]	ΔM [ppm]	m/z [Da]	RT [min]	# Missed Cleavages
	High	INcEVIGcSTDSQFTHLAWINTPR	3	1	1	X2JF59	C3(Carbamidomethyl); C8(Carbamidomethyl)	0	1716234292	0	8.78e-14	117.5	1.38706e-11	2	2819.32	-3.04755	1410.16	96.8973	0
	High	PAPAFAGTAVVNGVFK	7	1	1	X2JF59		0	1378578954	0	5.461e-11	116.19	3.83496e-11	2	1545.84	1.16738	773.426	45.1593	0
	High	VARDYGVLDEETGIPFR	5	1	1	X2JF59		0	2540974348	0	5.032e-14	106.82	4.15939e-10	2	1936.98	-0.401535	968.991	41.8172	1
	High	QGGLGSMDIPLLADK	2	1	1	X2JF59		0	495479922	0	1.163e-09	104.02	5.94417e-10	2	1514.79	-1.22438	757.897	50.281	0
	High	YGEVcPANWKPGQK	4	1	1	X2JF59	C5(Carbamidomethyl)	0	1132014160	0	8.181e-10	93.79	4.78416e-09	2	1633.78	-0.736697	817.393	27.7729	1
	High	DYGVLDEETGIPFR	5	1	1	X2JF59		0	2699844930	0	1.125e-07	85.6	3.73198e-08	2	1610.77	0.802344	805.889	51.7815	0
	High	INcEVIGcSTDSQFTHLAWINTPRK	4	1	1	X2JF59	C3(Carbamidomethyl); C8(Carbamidomethyl)	0	3.43345e+09	0	1.364e-13	80.51	1.33825e-07	3	2947.42	0.0625311	983.145	42.3322	1
	High	PQLQKPAPAFAGTAVVNGVFK	1	1	1	X2JF59		0	0	0	3.325e-10	65.73	1.83101e-06	3	2140.2	2.90379	714.071	81.5079	1
	High	LVQAFQYTDK	4	1	1	X2JF59		0	4.9257e+09	0	6.939e-06	63.35	4.9706e-06	2	1212.63	0.261418	606.817	55.4602	0
	High	QITVNDLPVGR	2	1	1	X2JF59		0	3.50317e+09	0	1.898e-05	61.81	6.98724e-06	2	1211.67	0.438225	606.341	36.0191	0
	High	YGEVcPANWK	1	1	1	X2JF59	C5(Carbamidomethyl)	0	4.43038e+07	0	2.287e-05	50.12	6.07967e-05	2	1223.55	2.01487	612.281	54.381	0
	High	GLFIIDDK	5	1	1	X2JF59		0	2766152260	0	0.004114	43.45	0.000472189	2	920.51	0.889527	460.758	41.8134	0
	High	TMVADPTK	1	1	1	X2JF59		0	2.94537e+07	0	0.0001894	43.08	0.000580607	2	862.435	0.796131	431.721	27.6565	0
	High	QNLRQITVNDLPVGR	1	1	1	X2JF59		0	1.89777e+07	0	9.346e-06	36.65	0.00190319	3	1722.96	0.573402	574.992	66.5585	1
	High	DYGVLDEETGIPFRGLFIIDDK	1	1	1	X2JF59		0	306578117	0	1.517e-11	34.35	0.00411356	3	2512.26	0.483512	838.092	62.8604	1
	High	VARDYGVLDEETGIPFRGLFIIDDK	1	1	1	X2JF59		0	198798060	0	1.185e-07	25.13	0.046956	4	2838.47	-0.671663	710.372	112.909	2
	High	SVEETLR	2	1	1	X2JF59		0	1044577408	0.002	0.08604	49.56	0.000163227	2	833.437	0.471352	417.222	19.7685	0
Q8MST5	Tubulin beta chain OS=Drosophila melanogaster OX=7227 GN=betaTub97EF PE=1 SV=1 - [Q8MST5_DROME]	1183.19	3.90126e+09	42	29.76	2	3	10	457	51.2196	4.85596
	A2	Sequence	# PSMs	# Proteins	# Protein Groups	Protein Group Accessions	Modifications	ΔCn	Area	q-Value	PEP	IonScore	Exp Value	Charge	MH+ [Da]	ΔM [ppm]	m/z [Da]	RT [min]	# Missed Cleavages
	High	GHYTEGAELIDSVLEVLRK	2	2	1	Q8MST5		0	88590573	0	4.081e-13	97.15	2.38049e-09	3	2129.12	-1.6283	710.378	54.9787	1
	High	MSATFIGNSTAIQEIFK	8	4	3	CON_00697107.2;A1ZBL0;Q8MST5		0	1775842968	0	3.57e-09	90.57	1.35058e-08	2	1857.94	-0.67068	929.474	113.286	0
	High	RISEQFTAMFR	8	4	3	CON_00697107.2;Q8MST5;A1ZBL0		0	971052672	0	8.216e-08	66.51	2.74729e-06	2	1385.7	0.359003	693.354	36.3296	1
	High	NSSYFVEWIPNNVK	6	5	4	CON_00697107.2;Q8MST5;A1ZBL0;A0A0B4LGH1		0	5550698672	0	3.412e-06	54.98	4.71766e-05	2	1696.83	0.10383	848.92	97.0171	0
	High	FPGQLNADLRK	9	7	5	CON_00697107.2;CON_00713000.3;Q8MST5;A1ZBL0;A0A0B4LGH1		0	1833838866	0	3.391e-07	53.62	8.36432e-05	2	1258.69	0.228854	629.849	28.0246	1
	High	LAVNMVPFPR	3	7	5	CON_00697107.2;CON_00713000.3;Q8MST5;A1ZBL0;A0A0B4LGH1		0	4319253188	0	4.12e-05	52.12	8.40854e-05	2	1143.63	0.0574596	572.321	43.4357	0
	High	IREEYPDR	3	7	5	CON_00697107.2;CON_00713000.3;Q8MST5;A1ZBL0;A0A0B4LGH1		0	423397177	0	0.001808	39.14	0.00148717	2	1077.53	0.00457672	539.27	16.8485	1
	High	ESEGcDcLQGFQLAHSLGGGTGSGLGTLLISK	1	2	1	Q8MST5	C5(Carbamidomethyl); C7(Carbamidomethyl)	0	44443124	0	2.803e-10	37.97	0.00260128	3	3249.56	2.5543	1083.86	111.653	0
	High	FPGQLNADLR	1	7	5	CON_00697107.2;CON_00713000.3;Q8MST5;A1ZBL0;A0A0B4LGH1		0	1.60546e+07	0	1.487e-05	28.47	0.023824	2	1130.6	1.5498	565.802	64.6471	0
	High	LHFFMPGFAPLTAK	1	2	1	Q8MST5		0	1.37484e+07	0	1.415e-05	10.86	1.4028	3	1576.84	2.75871	526.284	98.6322	0
E1JHR5	2-phospho-D-glycerate hydro-lyase OS=Drosophila melanogaster OX=7227 GN=Eno PE=1 SV=1 - [E1JHR5_DROME]	5211.08	3.39199e+09	172	74.83	1	27	27	433	46.633	6.55127
	A2	Sequence	# PSMs	# Proteins	# Protein Groups	Protein Group Accessions	Modifications	ΔCn	Area	q-Value	PEP	IonScore	Exp Value	Charge	MH+ [Da]	ΔM [ppm]	m/z [Da]	RT [min]	# Missed Cleavages
	High	FGLDATAVGDEGGFAPNIQSNK	3	1	1	E1JHR5		0	319216840	0	7.196e-13	118.55	1.59884e-11	2	2208.06	2.68128	1104.54	94.9857	0
	High	IEIGMDVAASEFYK	59	1	1	E1JHR5		0	6.32574e+07	0	5.488e-10	112.53	6.98088e-11	2	1572.77	4.67019	786.888	51.6616	0
	High	SGETEDSFIGDLVVGLSTGQIK	10	1	1	E1JHR5		0	4.0372e+08	0	1.133e-12	99.49	1.91745e-09	3	2252.13	1.03266	751.382	65.5924	0
	High	GNPTVEVDLTTELGLFR	23	1	1	E1JHR5		0	148341824	0	7.17e-10	93.79	7.24936e-09	2	1860.96	-3.14796	930.986	63.8966	0
	High	AAVPSGASTGVHEALELR	2	1	1	E1JHR5		0	194556826	0	1.237e-11	89.57	1.82173e-08	3	1764.93	0.693373	588.98	33.2697	0
	High	VNQIGTVTESIAAHLLAK	6	1	1	E1JHR5		0	3439704301	0	3.644e-11	88.57	1.08416e-08	3	1865.05	0.456098	622.355	49.1946	0
	High	AVGHVNDTLGPELIK	3	1	1	E1JHR5		0	2.72776e+09	0	7.834e-10	85.49	3.84184e-08	2	1562.85	0.0294745	781.931	32.8557	0
	High	ANLDVVDQASIDNFMIK	7	1	1	E1JHR5		0	589071989	0	7.66e-11	80.36	1.8409e-07	2	1892.95	2.3686	946.977	52.9472	0
	High	FGANAILGVSLAVAK	9	1	1	E1JHR5		0	107222762	0	2.78e-10	73.38	2.91591e-07	2	1430.84	-0.21665	715.922	129.323	0
	High	EIILPVPAFNVINGGSHAGNK	4	1	1	E1JHR5		0	1917485040	0	2.028e-12	72.04	7.7834e-07	3	2147.16	-1.48258	716.391	49.3569	0
	High	HIADLAGNK	4	1	1	E1JHR5		0	1.80909e+09	0	1.19e-05	68.63	1.11041e-06	2	938.506	0.940771	469.757	16.7282	0
	High	IEEEIGAGVK	4	1	1	E1JHR5		0	404186100	0	1.286e-05	67.18	2.23011e-06	2	1044.56	0.298132	522.782	26.0431	0
	High	AAVPSGASTGVHEALELRDNDK	5	1	1	E1JHR5		0	2.55382e+09	0	5.832e-12	66.96	3.15148e-06	3	2237.11	-0.58389	746.376	30.8807	1
	High	LANLYQEFIK	4	1	1	E1JHR5		0	2.71613e+09	0	1.033e-05	63.73	5.14726e-06	2	1238.68	0.323753	619.843	45.0078	0
	High	EALNLISDAIAK	2	1	1	E1JHR5		0	4008515760	0	1.652e-06	58.82	2.64408e-05	2	1257.71	0.810138	629.357	44.2943	0
	High	MGSEVYHHLK	4	1	1	E1JHR5		0	222011401	0	1.904e-06	50.78	9.02451e-05	2	1200.58	-0.496626	600.795	23.9205	0
	High	ARQIYDSR	2	1	1	E1JHR5		0	123884116	0	0.002016	46.44	0.000271249	2	1008.52	-0.432535	504.764	13.3479	1
	High	AcNcLLLK	2	1	1	E1JHR5	C2(Carbamidomethyl); C4(Carbamidomethyl)	0	1451232861	0	0.0006029	43.83	0.000670679	2	991.507	0.631671	496.257	27.7545	0
	High	SQWLPADK	2	1	1	E1JHR5		0	1503779564	0	0.002021	43.44	0.00068614	2	944.485	1.33362	472.746	28.1675	0
	High	YNQILRIEEEIGAGVK	6	1	1	E1JHR5		0	123796816	0	2.44e-08	42.74	0.000830089	3	1831.99	0.258247	611.335	44.3493	1
	High	LAMQEFMILPTGATSFTEAMK	1	1	1	E1JHR5		0	0	0	1.493e-09	41.12	0.00109721	3	2317.13	2.41016	773.049	61.2004	0
	High	RIATAVEK	3	1	1	E1JHR5		0	1.09932e+09	0	0.0001101	39.72	0.00120525	2	887.531	-0.217477	444.269	8.26052	1
	High	DGQYDLDFKNEK	1	1	1	E1JHR5		0	1.2364e+07	0	4.011e-05	38.04	0.000957921	2	1471.67	1.62372	736.34	51.763	1
	High	KNGWGTMVSHR	3	1	1	E1JHR5		0	45979932	0	6.394e-05	35.64	0.00353403	2	1272.63	-0.596569	636.817	24.1063	1
	High	DGQYDLDFK	1	1	1	E1JHR5		0	0	0	0.0002212	33.75	0.00126509	2	1100.49	0.247519	550.749	68.5319	0
	High	KGVPLYK	1	1	1	E1JHR5		0	3.32981e+08	0.001	0.01102	21.15	0.027625	2	804.498	-0.052209	402.753	21.2174	1
	High	KAcNcLLLK	1	1	1	E1JHR5	C3(Carbamidomethyl); C5(Carbamidomethyl)	0	1.28301e+07	0.002	0.0779	21.52	0.116627	2	1119.6	1.10518	560.305	30.109	1
O16043	Anon1A4 OS=Drosophila melanogaster OX=7227 GN=Df31 PE=1 SV=1 - [O16043_DROME]	2121.34	3.32536e+09	53	92.9	1	21	21	183	18.812	4.27197
	A2	Sequence	# PSMs	# Proteins	# Protein Groups	Protein Group Accessions	Modifications	ΔCn	Area	q-Value	PEP	IonScore	Exp Value	Charge	MH+ [Da]	ΔM [ppm]	m/z [Da]	RT [min]	# Missed Cleavages
	High	ENGAADSSATEPTDAVDGEK	2	1	1	O16043		0	2.32817e+08	0	8.282e-12	121.37	2.51663e-12	2	1963.84	0.64811	982.422	25.4048	0
	High	KESSEAVLPAVENGSEEVTNGDSTDAPAIEAVK	1	1	1	O16043		0	1.33856e+08	0	3.234e-16	117.09	2.14977e-11	3	3343.6	0.435376	1115.21	82.5747	1
	High	ASITENGGAEEESVAK	9	1	1	O16043		0	846574084	0	2.314e-10	103.97	3.94854e-10	2	1591.75	1.46037	796.377	23.9579	0
	High	AKLDEASTKDEVQNGAEASEVAA	3	1	1	O16043		0	9.8255e+08	0	3.24e-08	95.97	3.84453e-09	2	2333.11	0.927999	1167.06	53.8092	2
	High	LDEASTKDEVQNGAEASEVAA	1	1	1	O16043		0	350574631	0	6.797e-06	90.52	6.38752e-09	2	2133.98	0.218402	1067.49	61.2731	1
	High	ASEPTVSFAADKDEK	4	1	1	O16043		0	4065847636	0	6.453e-08	86.21	3.08738e-08	2	1594.76	0.215703	797.884	24.8401	1
	High	VAAEEVDAVKK	4	1	1	O16043		0	3355495620	0	2.657e-06	85.21	4.12782e-08	2	1158.64	0.0802481	579.822	18.5827	1
	High	DAVAAEEVAAEK	10	1	1	O16043		0	2554742169	0	1.729e-07	81.78	5.50907e-08	2	1202.59	-0.0914287	601.799	44.2197	0
	High	ASEPTVSFAADK	2	1	1	O16043		0	396779956	0	1.608e-05	77.09	1.88594e-07	2	1222.59	-0.243039	611.801	49.462	0
	High	ESSEAVLPAVENGSEEVTNGDSTDAPAIEAVK	1	1	1	O16043		0	1.83022e+06	0	2.125e-15	71.43	6.43907e-07	3	3215.51	-0.041018	1072.51	94.2714	0
	High	ADEAVATPEK	1	1	1	O16043		0	72773250	0	1.138e-06	58.12	1.20253e-05	2	1030.51	0.102204	515.756	17.8906	0
	High	aDVAEQKNETPVVEK	2	1	1	O16043	N-Term(Acetyl)	0	9.98751e+07	0	3.91e-06	57.8	1.77576e-05	2	1698.86	0.708824	849.932	49.9207	1
	High	VAAEEVDAVK	1	1	1	O16043		0	2.94608e+08	0	0.0001738	49.23	0.000148652	2	1030.54	0.326446	515.775	35.265	0
	High	ASEPTVSFAADKDEKK	4	1	1	O16043		0	123613130	0	9.94e-10	45.42	0.000444971	3	1722.86	0.511109	574.957	21.1753	2
	High	ESSEAVLPAVENGSEEVTNGDSTDAPAIEAVKR	1	1	1	O16043		0	0	0	6.805e-10	37.68	0.00214113	3	3371.62	3.09716	1124.54	85.1593	1
	High	RKVDEAAAKADEAVATPEK	1	1	1	O16043		0	5.1589e+06	0	1.238e-09	36.42	0.00412742	3	1999.05	-0.0379963	667.02	30.6059	3
	High	NETPVVEK	2	1	1	O16043		0	1.95626e+08	0	0.001968	33.94	0.00268424	2	915.479	0.82926	458.243	17.145	0
	High	ADEAVATPEKK	1	1	1	O16043		0	5125849	0	0.002396	26.37	0.0239902	2	1158.6	-1.17281	579.803	13.5923	1
	High	KVDEAAAKADEAVATPEK	1	1	1	O16043		0	5.33912e+06	0	5.601e-07	16.97	0.318441	3	1842.94	0.182336	614.986	33.5352	2
	High	ASEPTVSFAADKDEKKDEDK	1	1	1	O16043		0	1.31237e+07	0	1.267e-05	11.39	1.29247	4	2210.05	0.114954	553.267	30.99	3
	High	KDAVAAEEVAAEK	1	1	1	O16043		0	6.68369e+07	0.001	0.0105	9.69	1.3049	3	1330.68	-4.03682	444.231	29.5946	1
Q9W229	40S ribosomal protein S24 OS=Drosophila melanogaster OX=7227 GN=RpS24 PE=1 SV=1 - [Q9W229_DROME]	754.45	3.20123e+09	25	38.93	1	5	5	131	15.0382	11.2241
	A2	Sequence	# PSMs	# Proteins	# Protein Groups	Protein Group Accessions	Modifications	ΔCn	Area	q-Value	PEP	IonScore	Exp Value	Charge	MH+ [Da]	ΔM [ppm]	m/z [Da]	RT [min]	# Missed Cleavages
	High	STGFALIYDTLDFAK	9	1	1	Q9W229		0	1647903931	0	7.019e-10	88.57	2.40462e-08	2	1661.84	0.972594	831.426	59.963	0
	High	QMVcDVLHPGLSSVNK	4	1	1	Q9W229	C4(Carbamidomethyl)	0	482836406	0	2.401e-10	80.85	1.00314e-07	2	1783.89	1.88624	892.447	64.9819	0
	High	VTPDVVFAFGFR	6	1	1	Q9W229		0	6650105552	0	1.296e-05	55.09	2.57086e-05	2	1354.72	2.00481	677.863	54.83	0
	High	HGLFEQKK	3	1	1	Q9W229		0	4.37716e+08	0	1.516e-05	45.88	0.000335694	2	986.541	-0.469215	493.774	7.71385	1
	High	HGLFEQK	2	1	1	Q9W229		0	1305695440	0	0.0007185	42.44	0.000436176	2	858.447	0.668642	429.727	17.0367	0
	High	QmVcDVLHPGLSSVNK	1	1	1	Q9W229	M2(Oxidation); C4(Carbamidomethyl)	0	56281910	0	0.009348	5.96	4.49985	3	1799.88	1.05875	600.631	58.5616	0
A0A0B4KI24	Nucleoplasmin, isoform B OS=Drosophila melanogaster OX=7227 GN=Nlp PE=3 SV=1 - [A0A0B4KI24_DROME]	461.491	3.07244e+09	18	62.5	1	7	7	152	16.9854	4.61475
	A2	Sequence	# PSMs	# Proteins	# Protein Groups	Protein Group Accessions	Modifications	ΔCn	Area	q-Value	PEP	IonScore	Exp Value	Charge	MH+ [Da]	ΔM [ppm]	m/z [Da]	RT [min]	# Missed Cleavages
	High	AVNPDVEFYESK	3	1	1	A0A0B4KI24		0	3656223736	0	7.049e-07	87.39	1.43176e-08	2	1397.66	0.86015	699.333	62.5859	0
	High	ENEFNVVEVNTPK	2	1	1	A0A0B4KI24		0	2.73138e+09	0	1.702e-07	80.65	1.45938e-07	2	1518.74	-0.371214	759.875	37.2464	0
	High	GSGPVYIHGHNIK	4	1	1	A0A0B4KI24		0	7.38294e+07	0	4.38e-07	68.98	1.85284e-06	2	1378.72	-0.581657	689.865	24.6474	0
	High	AKIENAADGK	1	1	1	A0A0B4KI24		0	1.06813e+06	0	0.0001575	57.53	2.88747e-05	2	1016.54	-0.724763	508.772	2.71821	1
	High	aEESFYGVTLTAESDSVTWDVDEDYAR	4	1	1	A0A0B4KI24	N-Term(Acetyl)	0	613790	0	6.593e-10	50.7	3.91523e-05	3	3097.34	-1.11624	1033.12	134.05	0
	High	DSVQIPIAVLK	3	1	1	A0A0B4KI24		0	2829720428	0	3.925e-05	39.46	0.00053789	2	1182.71	0.795949	591.859	47.4908	0
	High	QILLGAEAK	1	1	1	A0A0B4KI24		0	8.56641e+08	0	0.003697	30.68	0.00867893	2	942.562	-0.0372262	471.785	44.644	0
M9NEQ9	Ribosomal protein S10b, isoform D OS=Drosophila melanogaster OX=7227 GN=RpS10b PE=1 SV=1 - [M9NEQ9_DROME]	1117.45	2.79071e+09	45	67.5	1	12	12	160	17.8673	9.80322
	A2	Sequence	# PSMs	# Proteins	# Protein Groups	Protein Group Accessions	Modifications	ΔCn	Area	q-Value	PEP	IonScore	Exp Value	Charge	MH+ [Da]	ΔM [ppm]	m/z [Da]	RT [min]	# Missed Cleavages
	High	KGDVGPGAGEVEFR	5	1	1	M9NEQ9		0	669421580	0	5.906e-11	113.57	4.92287e-11	2	1417.71	0.149318	709.357	25.7632	1
	High	HYYWYLTNEGIEELR	6	1	1	M9NEQ9		0	3.30323e+08	0	5.197e-10	77.93	1.86835e-07	2	1985.95	4.00305	993.477	45.5892	0
	High	VAIYEYLFK	3	1	1	M9NEQ9		0	2187808419	0	0.000367	65.67	5.28487e-06	2	1145.62	0.462706	573.316	49.7229	0
	High	HPELESIPNLHVIK	4	1	1	M9NEQ9		0	4086638392	0	4.686e-10	54.76	4.51163e-05	2	1625.9	-0.81524	813.453	34.3035	0
	High	SYLHLPPEIVPSTLK	8	1	1	M9NEQ9		0	476572754	0	4.09e-09	54.56	2.5721e-05	3	1693.95	-0.519553	565.322	43.6752	0
	High	AHRVAIYEYLFK	2	1	1	M9NEQ9		0	255361012	0	4.998e-10	53.5	5.31553e-05	3	1509.82	-0.126974	503.945	36.1704	1
	High	AMQSLHSR	3	1	1	M9NEQ9		0	7.97865e+07	0	0.0001271	52.36	3.83305e-05	2	929.462	-0.454827	465.235	7.24051	0
	High	GDVGPGAGEVEFR	2	1	1	M9NEQ9		0	140217724	0	3.276e-06	38.37	0.000764116	2	1289.61	-0.877619	645.309	31.9998	0
	High	SETVRPRPAVGGPR	4	1	1	M9NEQ9		0	997461016	0	6.087e-05	15.99	0.283239	3	1478.82	0.479994	493.611	16.5275	2
	High	SETVRPRPAVGGPRGPGDASK	3	1	1	M9NEQ9		0	2.09767e+09	0	7.023e-05	12.3	0.897987	4	2091.11	0.402968	523.532	17.4512	3
	High	HYYWYLTNEGIEELRSYLHLPPEIVPSTLK	4	1	1	M9NEQ9		0	1295455783	0	1.587e-09	10.8	1.07298	4	3660.89	3.43686	915.977	61.233	1
	High	TGEDRSAYR	1	1	1	M9NEQ9		0	2.4558e+06	0.001	0.01776	19.06	0.0651867	3	1054.49	-0.0637704	352.169	4.08586	1
X2JCS6	60S ribosomal protein L7a OS=Drosophila melanogaster OX=7227 GN=RpL7A PE=3 SV=1 - [X2JCS6_DROME]	1387.17	2.70137e+09	54	53.51	1	20	20	271	30.7127	10.7114
	A2	Sequence	# PSMs	# Proteins	# Protein Groups	Protein Group Accessions	Modifications	ΔCn	Area	q-Value	PEP	IonScore	Exp Value	Charge	MH+ [Da]	ΔM [ppm]	m/z [Da]	RT [min]	# Missed Cleavages
	High	TcTTLALTTVDNNDK	7	1	1	X2JCS6	C2(Carbamidomethyl)	0	1637360942	0	2.158e-09	95.64	3.56132e-09	2	1666.8	0.311175	833.902	33.591	0
	High	KKPSYVSAGTNTVTK	6	1	1	X2JCS6		0	2330570947	0	9.723e-09	82.84	5.90195e-08	3	1580.86	-0.237558	527.626	16.0576	2
	High	RHWGGGILGSK	3	1	1	X2JCS6		0	296026624	0	3.652e-09	72.42	5.64204e-07	3	1167.64	0.136201	389.884	19.9846	1
	High	VPPPIHQFSQTLDK	5	1	1	X2JCS6		0	3505440304	0	7.605e-06	67.69	2.13621e-06	2	1606.86	0.519921	803.933	57.6278	0
	High	NFGIGQNVQPK	2	1	1	X2JCS6		0	2211650968	0	3.357e-05	65.16	4.95283e-06	2	1201.63	0.137029	601.32	49.4701	0
	High	HWGGGILGSK	3	1	1	X2JCS6		0	2.11368e+09	0	2.896e-05	59.19	9.33903e-06	2	1011.54	0.90967	506.273	40.5181	0
	High	PSYVSAGTNTVTK	1	1	1	X2JCS6		0	6.32124e+06	0	8.788e-09	57.28	1.55267e-05	2	1324.67	0.370647	662.841	38.4751	0
	High	KVAPAPLAVK	3	1	1	X2JCS6		0	340319902	0	1.564e-05	54.32	3.68952e-06	2	993.646	-0.0361183	497.326	20.1161	1
	High	KVVNQLFEK	1	1	1	X2JCS6		0	623385542	0	1.088e-05	51.96	6.94107e-05	2	1104.64	0.166317	552.824	34.9908	1
	High	VAPAPLAVK	2	1	1	X2JCS6		0	1630590748	0	0.0002046	49.74	1.48637e-05	2	865.551	-0.0422758	433.279	40.257	0
	High	KAQLVVIAHDVDPLELVLFLPALcRK	2	1	1	X2JCS6	C24(Carbamidomethyl)	0	222439532	0	1.235e-12	49.05	1.24157e-05	4	2957.7	0.259537	740.181	58.4225	2
	High	AQLVVIAHDVDPLELVLFLPALcRK	3	1	1	X2JCS6	C23(Carbamidomethyl)	0	1257931461	0	2.528e-13	46.42	5.3588e-05	3	2829.6	-1.03999	943.873	63.7291	1
	High	VVNQLFEK	2	1	1	X2JCS6		0	1053385069	0	0.001628	44.26	0.000329976	2	976.547	0.812423	488.777	28.3786	0
	High	YRPESPLAK	3	1	1	X2JCS6		0	1133216330	0	0.0003842	36.8	0.00285189	2	1060.58	0.392041	530.793	20.093	1
	High	AQLVVIAHDVDPLELVLFLPALcR	1	1	1	X2JCS6	C23(Carbamidomethyl)	0	1.64807e+08	0	7.983e-10	30.26	0.00395594	3	2701.51	0.0174905	901.175	69.9072	0
	High	MGVPYcIVK	1	1	1	X2JCS6	C6(Carbamidomethyl)	0	1.83313e+08	0	0.0008289	30.25	0.0126976	2	1066.54	-0.256383	533.775	66.1494	0
	High	TNFNERHEEIR	2	1	1	X2JCS6		0	326365979	0	0.0008624	24.11	0.0322165	3	1444.69	0.480585	482.236	16.5252	1
	High	TNFNERHEEIRR	5	1	1	X2JCS6		0	2.2681e+09	0	0.001034	21.92	0.0890122	3	1600.79	-0.395568	534.269	18.331	2
	High	KPSYVSAGTNTVTK	1	1	1	X2JCS6		0	3.20603e+07	0	5.38e-05	20.37	0.102853	3	1452.77	0.161142	484.928	27.531	1
	High	VAPAPLAVKKPVVK	1	1	1	X2JCS6		0	0	0	0.004407	1.54	0.699794	3	1416.93	-0.20965	472.981	35.3678	2
Q8IMI7	40S ribosomal protein S7 OS=Drosophila melanogaster OX=7227 GN=RpS7 PE=1 SV=2 - [Q8IMI7_DROME]	1842.89	2.64736e+09	72	82.99	1	26	26	194	22.1563	9.80322
	A2	Sequence	# PSMs	# Proteins	# Protein Groups	Protein Group Accessions	Modifications	ΔCn	Area	q-Value	PEP	IonScore	Exp Value	Charge	MH+ [Da]	ΔM [ppm]	m/z [Da]	RT [min]	# Missed Cleavages
	High	SIAQALVELEANSDLKPYLR	8	1	1	Q8IMI7		0	2786978902	0	9.747e-13	133.51	5.77125e-13	2	2230.21	-0.355326	1115.61	113.864	1
	High	NQQTTIEHKVDTFTSVYK	3	1	1	Q8IMI7		0	427326999	0	7.102e-12	107.88	2.49282e-10	2	2139.07	-2.01064	1070.04	60.6929	1
	High	SIAQALVELEANSDLK	3	1	1	Q8IMI7		0	45869575	0	5.576e-08	79.92	1.76726e-07	3	1700.91	1.18301	567.641	108.993	0
	High	KAVIIYVPIPQQK	4	1	1	Q8IMI7		0	168017054	0	1.523e-10	76.46	7.23019e-08	2	1496.92	0.895803	748.964	36.6259	1
	High	IIKPGGSDPDDFEK	4	1	1	Q8IMI7		0	3028364212	0	1.386e-07	74.93	3.40648e-07	2	1517.75	0.185442	759.378	26.1561	1
	High	VDTFTSVYK	2	1	1	Q8IMI7		0	1141756116	0	0.000148	71.33	9.20259e-07	2	1059.54	0.539086	530.272	31.2232	0
	High	AREIEFGSK	3	1	1	Q8IMI7		0	447345616	0	3.401e-05	67.26	2.85656e-06	2	1036.54	0.865491	518.775	18.6798	1
	High	TLTAVYDAILEDLVFPAEIVGK	1	1	1	Q8IMI7		0	160798722	0	3.067e-11	63.56	4.4496e-06	3	2377.29	-2.11624	793.1	70.5716	0
	High	SRTLTAVYDAILEDLVFPAEIVGK	1	1	1	Q8IMI7		0	2.76326e+08	0	4.75e-12	61.91	5.73311e-06	3	2620.42	-0.115432	874.146	69.2682	1
	High	TLTAVYDAILEDLVFPAEIVGKR	1	1	1	Q8IMI7		0	0	0	2.46e-11	61.86	4.72431e-06	3	2533.39	-0.124709	845.135	70.0736	1
	High	AREIEFGSKK	4	1	1	Q8IMI7		0	1.57719e+08	0	0.005919	57.32	1.81646e-05	2	1164.64	-0.59168	582.822	13.9509	2
	High	AVIIYVPIPQQK	3	1	1	Q8IMI7		0	1846703537	0	2.933e-05	51.24	3.72053e-05	2	1368.82	-0.180206	684.916	44.7954	0
	High	HVVVIAERK	6	1	1	Q8IMI7		0	1.57681e+09	0	0.0004925	42.02	0.000185277	2	1050.64	0.931396	525.825	14.2268	1
	High	VKLDGSQLVK	1	1	1	Q8IMI7		0	2.7943e+07	0	0.0005581	37.35	0.0023838	2	1086.65	0.664535	543.83	41.2964	1
	High	KILPKPTRK	1	1	1	Q8IMI7		0	2.19397e+07	0	0.0001314	34.77	0.000332637	3	1080.73	0.190321	360.913	2.89094	3
	High	HVVVIAER	2	1	1	Q8IMI7		0	546293756	0	0.0003643	32.96	0.00235208	2	922.547	0.332205	461.777	18.5293	0
	High	EIEFGSKK	1	1	1	Q8IMI7		0	76219466	0	0.0007572	30.06	0.00922171	2	937.499	-0.349344	469.253	19.9804	1
	High	ILPKPTRK	6	1	1	Q8IMI7		0	1.47478e+09	0	0.006627	23.35	0.00624214	3	952.63	0.0870337	318.215	8.42321	2
	High	PYLRDLHITR	1	1	1	Q8IMI7		0	97933158	0	0.006726	17.61	0.157776	4	1283.72	0.018099	321.686	26.8893	1
	High	PGGSDPDDFEK	1	1	1	Q8IMI7		0	1.05357e+07	0	2.508e-05	11.06	0.160603	2	1163.49	4.79501	582.249	33.7421	0
	High	KLTGRDVTFEFPDNYLNV	1	1	1	Q8IMI7		0	316046600	0	0.00182	11.06	1.13989	3	2128.07	0.481345	710.029	48.4502	2
	High	IQIILVRELEK	1	1	1	Q8IMI7		0	3.43444e+07	0	0.006283	1.76	1.00021	3	1353.85	0.329552	451.954	76.2614	1
	High	EIEFGSK	2	1	1	Q8IMI7		0	1.73546e+08	0.001	0.02335	34.33	0.00138367	2	809.404	-0.330092	405.206	33.6181	0
	High	IQIILVR	5	1	1	Q8IMI7		0	2126727656	0.001	0.01225	32.49	0.000562302	2	854.583	0.381274	427.795	70.0253	0
	High	DVTFEFPDNYLNV	5	1	1	Q8IMI7		0	854530510	0.002	0.08598	27.88	0.00953138	2	1572.72	-2.09186	786.863	68.2424	0
	High	LTGRDVTFEFPDNYLNV	2	1	1	Q8IMI7		0	449700798	0.002	0.04476	17.49	0.296766	2	1999.98	3.32619	1000.49	113.387	1
D1Z3A1	60S ribosomal protein L28 OS=Drosophila melanogaster OX=7227 GN=RpL28 PE=1 SV=1 - [D1Z3A1_DROME]	1063.7	2613412240	32	64.58	1	15	15	144	16.0191	11.0923
	A2	Sequence	# PSMs	# Proteins	# Protein Groups	Protein Group Accessions	Modifications	ΔCn	Area	q-Value	PEP	IonScore	Exp Value	Charge	MH+ [Da]	ΔM [ppm]	m/z [Da]	RT [min]	# Missed Cleavages
	High	PFSTEPNNLASVSSYR	2	1	1	D1Z3A1		0	7.06766e+07	0	1.89e-11	115.81	2.70295e-11	2	1768.85	1.33041	884.93	71.192	0
	High	KPFSTEPNNLASVSSYR	4	1	1	D1Z3A1		0	2443212208	0	2.722e-12	111.4	1.15185e-10	2	1896.94	-0.110432	948.976	31.7293	1
	High	aTSSHLNWLIIR	4	1	1	D1Z3A1	N-Term(Acetyl)	0	3892552776	0	1.315e-09	102.64	6.75183e-10	2	1452.79	-1.51405	726.9	48.7946	0
	High	TLGVVPAADKK	3	1	1	D1Z3A1		0	6.32814e+08	0	1.823e-05	57.03	1.9419e-05	2	1098.65	0.203739	549.83	20.4604	1
	High	NNNAFLLK	2	1	1	D1Z3A1		0	1504471736	0	0.001614	56.89	3.18222e-05	2	933.516	0.746077	467.262	29.3927	0
	High	TLGVVPAADK	2	1	1	D1Z3A1		0	652200100	0	3.665e-05	53.03	3.68325e-05	2	970.557	0.355677	485.782	42.8192	0
	High	RASAVLR	3	1	1	D1Z3A1		0	266981518	0	0.0003322	40.54	0.00016337	2	772.479	0.114093	386.743	3.00486	1
	High	NTVRVDFK	3	1	1	D1Z3A1		0	816996715	0	0.001006	35.59	0.002871	2	978.536	-0.645785	489.772	20.5546	1
	High	YSGIVHK	1	1	1	D1Z3A1		0	3.48769e+08	0	0.005177	32.08	0.00789787	2	803.441	0.146088	402.224	12.6012	0
	High	DLTQAALRR	2	1	1	D1Z3A1		0	748535548	0	0.00703	29.82	0.0112049	2	1043.6	-0.040865	522.301	24.2665	1
	High	KGFTAVLK	1	1	1	D1Z3A1		0	1.20802e+08	0	0.003301	28.98	0.00284566	2	863.535	0.210198	432.271	30.7404	1
	High	DLTQAALR	2	1	1	D1Z3A1		0	376431206	0.001	0.01276	32.82	0.00822774	2	887.495	0.691256	444.251	29.2417	0
	High	GFTAVLKK	1	1	1	D1Z3A1		0	180530176	0.001	0.03833	13.12	0.109694	2	863.536	1.41177	432.272	21.4253	1
	High	NLLIGSK	1	1	1	D1Z3A1		0	1453215304	0.002	0.07876	38.94	0.000446754	2	744.462	1.17746	372.735	25.7069	0
	High	GFTAVLK	1	1	1	D1Z3A1		0	695629424	0.002	0.09043	29.41	0.00114551	2	735.441	1.07577	368.224	28.6353	0
M9PCC1	Receptor of activated protein kinase C 1, isoform C OS=Drosophila melanogaster OX=7227 GN=Rack1 PE=4 SV=1 - [M9PCC1_DROME]	2877.36	2.5633e+09	93	90.57	2	24	25	318	35.5957	7.47412
	A2	Sequence	# PSMs	# Proteins	# Protein Groups	Protein Group Accessions	Modifications	ΔCn	Area	q-Value	PEP	IonScore	Exp Value	Charge	MH+ [Da]	ΔM [ppm]	m/z [Da]	RT [min]	# Missed Cleavages
	High	NNHHGHNGYLNTVTVSPDGSLcTSGGK	5	1	1	M9PCC1	C22(Carbamidomethyl)	0	4.44472e+08	0	6.347e-14	131.71	6.6441e-13	2	2823.3	3.80811	1412.15	46.996	0
	High	GTLIGHNGWVTQIATNPK	3	2	1	M9PCC1		0	1499419224	0	1.234e-13	119.64	1.43408e-11	2	1907.02	1.29283	954.012	36.6365	0
	High	RLYGHSHFISDVVLSSDGNYALSGSWDQTLR	2	2	1	M9PCC1		0	82708469	0	1.864e-15	100.96	1.16644e-09	3	3480.68	-3.79077	1160.9	128.989	1
	High	FSPNHSNPIIVScGWDR	4	1	1	M9PCC1	C13(Carbamidomethyl)	0	2814400006	0	1.685e-12	97.78	1.4255e-09	3	1985.93	0.74254	662.648	35.8606	0
	High	ADQPQcLSLAWSTDGQTLFAGYSDNTIR	2	1	1	M9PCC1	C6(Carbamidomethyl)	0	1.87208e+07	0	1.926e-11	97.02	1.59881e-09	3	3115.44	-0.533518	1039.15	127.301	0
	High	TVEELRPEVVSPTSK	5	1	1	M9PCC1		0	2329232792	0	2.686e-08	85.36	3.92947e-08	2	1670.9	0.524799	835.952	29.4989	1
	High	GTLIGHNGWVTQIATNPKDPDTIISASR	4	2	1	M9PCC1		0	489175928	0	1.491e-16	81.81	9.42619e-08	3	2962.54	0.185711	988.184	85.9756	1
	High	NLYTLEHNDIINALcFSPNR	3	1	1	M9PCC1	C15(Carbamidomethyl)	0	955115536	0	2.886e-14	81.78	8.92734e-08	3	2404.17	0.227073	802.062	51.0297	0
	High	DVLSVAFSADNR	18	1	1	M9PCC1		0	30407684	0	3.104e-07	71.78	6.9693e-07	2	1293.65	4.95232	647.329	54.9896	0
	High	LWNTLAEcK	2	1	1	M9PCC1	C8(Carbamidomethyl)	0	2345254432	0	0.000136	69.31	1.75829e-06	2	1134.56	0.816251	567.785	56.8144	0
	High	DPDTIISASRDK	4	2	1	M9PCC1		0	224284832	0	1.811e-06	62.17	9.19206e-06	3	1317.67	1.39198	439.894	25.365	1
	High	DPDTIISASR	2	2	1	M9PCC1		0	1.1547e+09	0	9.665e-05	59.58	1.33286e-05	2	1074.54	0.358337	537.775	51.9636	0
	High	ALLWDLNDGK	3	1	1	M9PCC1		0	2530245840	0	9.554e-05	59.25	1.83029e-05	2	1144.6	-0.197795	572.803	44.7994	0
	High	YWLcVAYGPSIK	3	1	1	M9PCC1	C4(Carbamidomethyl)	0	624975776	0	8.593e-06	57.36	2.16712e-05	2	1456.73	0.6157	728.869	93.2998	0
	High	sETLQLR	2	2	1	M9PCC1	N-Term(Acetyl)	0	828351621	0	0.002885	56.27	3.91839e-05	2	888.479	0.832147	444.743	63.7924	0
	High	VWQVSVSAH	6	1	1	M9PCC1		0	301609824	0	0.0001027	54.65	2.53648e-05	2	1012.52	0.676345	506.765	58.4794	0
	High	LWDLAAGK	2	3	2	M9PCC1;Q9VYQ9		0	1933957376	0	0.007561	47.22	0.000355632	2	873.483	0.309789	437.245	35.4748	0
	High	LTRDEDTNYGYPQK	5	2	1	M9PCC1		0	1.8255e+09	0	1.388e-07	46	0.000184624	2	1699.79	0.306454	850.4	22.1173	1
	High	VWNLANcK	3	1	1	M9PCC1	C7(Carbamidomethyl)	0	1282495192	0	0.001094	42.85	0.000625154	2	1004.5	0.0221794	502.753	28.4901	0
	High	KTVEELRPEVVSPTSK	1	1	1	M9PCC1		0	338961936	0	6.352e-09	41.6	0.000923594	3	1798.99	1.46424	600.336	25.2494	2
	High	NLYTLEHNDIINALcFSPNRYWLcVAYGPSIK	2	1	1	M9PCC1	C15(Carbamidomethyl); C24(Carbamidomethyl)	0	939760197	0	2.215e-11	27.87	0.0200865	4	3841.88	-0.525042	961.226	58.8834	1
	High	FTIQEDGHTDWVScVR	6	1	1	M9PCC1	C14(Carbamidomethyl)	0	109043071	0	1.035e-06	27.44	0.0116295	3	1949.88	1.23225	650.633	75.7651	0
	High	IWDLAcKK	3	1	1	M9PCC1	C6(Carbamidomethyl)	0	306030096	0	0.002127	27.01	0.0445911	2	1033.55	0.717409	517.279	39.8783	1
	High	QIVSGSR	1	1	1	M9PCC1		0	1.64929e+07	0	0.006095	26.51	0.0150766	2	746.417	1.40838	373.712	8.34641	0
	High	IWDLAcK	2	1	1	M9PCC1	C6(Carbamidomethyl)	0	727087786	0.001	0.02239	38.8	0.00267606	2	905.455	0.144042	453.231	33.3043	0
M9PB84	40S ribosomal protein S2 OS=Drosophila melanogaster OX=7227 GN=RpS2 PE=3 SV=1 - [M9PB84_DROME]	1489.68	2.52452e+09	48	59.93	1	17	17	267	28.8814	10.1548
	A2	Sequence	# PSMs	# Proteins	# Protein Groups	Protein Group Accessions	Modifications	ΔCn	Area	q-Value	PEP	IonScore	Exp Value	Charge	MH+ [Da]	ΔM [ppm]	m/z [Da]	RT [min]	# Missed Cleavages
	High	LLTMAGIEDcYTSAR	4	1	1	M9PB84	C10(Carbamidomethyl)	0	927202398	0	1.025e-08	97.67	1.24831e-09	2	1700.8	-0.0893687	850.903	43.8322	0
	High	EmPLGSTPYQAYSDFLSKPTPR	1	1	1	M9PB84	M2(Oxidation)	0	318658988	0	3.581e-14	95.34	3.14346e-09	3	2501.2	0.520476	834.406	44.9016	1
	High	EFEIIDFFLGSSLK	3	1	1	M9PB84		0	118940173	0	1.912e-08	77.16	3.23079e-07	2	1644.85	0.85713	822.93	70.3906	0
	High	IGKPHTVPcK	4	1	1	M9PB84	C9(Carbamidomethyl)	0	9.73897e+08	0	1.069e-06	66.8	2.21465e-06	2	1136.63	0.566914	568.816	12.5291	1
	High	EMPLGSTPYQAYSDFLSKPTPR	3	1	1	M9PB84		0	1585889203	0	2.016e-11	65.68	4.23169e-06	3	2485.21	-0.0241583	829.074	47.8134	1
	High	SLEEIYLYSLPIK	3	1	1	M9PB84		0	3.33017e+09	0	5.436e-08	64.67	3.13897e-06	2	1567.87	2.5123	784.437	54.8251	0
	High	AFVAIGDNNGHIGLGVK	3	1	1	M9PB84		0	452206240	0	8.036e-09	63.11	6.25475e-06	3	1681.9	1.0598	561.306	38.3575	0
	High	EMPLGSTPYQAYSDFLSK	1	1	1	M9PB84		0	134894161	0	2.65e-08	58.85	1.51167e-05	2	2033.95	-0.289783	1017.48	108.747	0
	High	EFEIIDFFLGSSLKDEVLK	6	1	1	M9PB84		0	987555683	0	1.659e-09	55	5.88184e-05	3	2229.17	-0.192021	743.728	67.498	1
	High	GSTGTLGNFAK	1	1	1	M9PB84		0	1971420048	0	8.479e-05	54.22	3.00862e-05	2	1052.54	0.469299	526.772	25.317	0
	High	GTGIVSAPVPK	2	1	1	M9PB84		0	2271965784	0	4.335e-05	52.02	2.70065e-05	2	1025.6	0.848103	513.304	27.8527	0
	High	LSVVPVR	2	1	1	M9PB84		0	1.61785e+08	0	0.003604	49.64	3.09631e-05	2	769.493	-0.160858	385.25	46.3099	0
	High	TYAYLTPDLWK	6	1	1	M9PB84		0	1526448165	0	2.02e-05	48.92	0.000125027	2	1370.7	0.558401	685.854	96.1165	0
	High	GTGIVSAPVPKK	2	1	1	M9PB84		0	4.99088e+07	0	3.958e-05	48.21	7.85242e-05	3	1153.69	-0.500354	385.236	33.6129	1
	High	ATYAAIAK	2	1	1	M9PB84		0	402112540	0	0.0003482	41.32	0.000368952	2	808.458	1.56701	404.732	27.8505	0
	High	LSVVPVRR	3	1	1	M9PB84		0	1409477530	0	0.001734	29.63	0.00108635	2	925.594	-0.446958	463.301	22.0004	1
	High	EVATAIR	1	1	1	M9PB84		0	1.74318e+08	0.001	0.01467	47.97	0.000128468	2	759.436	-0.0139779	380.222	24.0657	0
	High	GAIILAK	1	1	1	M9PB84		0	1239990288	0.002	0.04972	49.51	1.11679e-05	2	685.459	-1.94485	343.233	23.9687	0
A0A0B4KEH0	14-3-3zeta, isoform K OS=Drosophila melanogaster OX=7227 GN=14-3-3zeta PE=1 SV=1 - [A0A0B4KEH0_DROME]	1292.74	2.50658e+09	39	68.15	3	12	15	248	28.2101	4.88135
	A2	Sequence	# PSMs	# Proteins	# Protein Groups	Protein Group Accessions	Modifications	ΔCn	Area	q-Value	PEP	IonScore	Exp Value	Charge	MH+ [Da]	ΔM [ppm]	m/z [Da]	RT [min]	# Missed Cleavages
	High	NTVVDDSQTAYQDAFDISK	3	1	1	A0A0B4KEH0		0	947309758	0	2.315e-11	104.38	2.18852e-10	2	2116.97	0.959126	1058.99	90.0059	0
	High	SVTETGVELSNEER	4	1	1	A0A0B4KEH0		0	681707144	0	7.359e-08	82.59	5.89364e-08	2	1549.74	0.686389	775.371	28.8518	0
	High	ELREIcYEVLGLLDK	6	1	1	A0A0B4KEH0	C6(Carbamidomethyl)	0	1278262522	0	4.826e-11	82.28	8.81427e-08	2	1849.97	0.622345	925.491	53.9945	1
	High	SVTETGVELSNEERNLLSVAYK	3	1	1	A0A0B4KEH0		0	547044208	0	2.345e-12	81.25	1.35731e-07	2	2438.24	0.898336	1219.63	95.3751	1
	High	sTVDKEELVQK	1	1	1	A0A0B4KEH0	N-Term(Acetyl)	0	2062672930	0	2.711e-07	73.34	7.69322e-07	2	1317.69	0.500054	659.349	26.2455	1
	High	QAFDDAIAELDTLNEDSYK	2	1	1	A0A0B4KEH0		0	247468476	0	5.898e-09	71.23	4.97215e-07	3	2157.98	0.335998	719.999	55.8639	0
	High	LAEQSERYDDMAQAMK	2	1	1	A0A0B4KEH0		0	171689404	0	3.86e-08	69.04	5.23901e-07	2	1885.85	1.87464	943.426	53.4403	1
	High	YLAEVATGDAR	4	1	1	A0A0B4KEH0		0	2053043704	0	5.798e-06	67.71	2.00779e-06	2	1165.59	0.78043	583.297	27.4138	0
	High	EIcYEVLGLLDK	2	1	1	A0A0B4KEH0	C3(Carbamidomethyl)	0	394714915	0	2.864e-07	65.52	4.29231e-06	2	1451.75	0.881827	726.377	53.5468	0
	High	NLLSVAYK	2	5	3	A0A0B4KEH0;CON_00696435.1;CON_00703110.1		0	3404012112	0	0.0004714	58.1	7.82152e-06	2	907.525	0.196846	454.266	59.3895	0
	High	DSTLIMQLLR	3	5	3	A0A0B4KEH0;CON_00696435.1;CON_00703110.1		0	1.05876e+09	0	2.538e-05	55.59	4.14087e-05	2	1189.66	1.19346	595.335	56.1169	0
	High	MQPTHPIR	1	1	1	A0A0B4KEH0		0	1.83837e+07	0	0.0003686	42.94	0.000792729	3	979.514	0.107805	327.176	14.7437	0
	High	VISSIEQK	2	3	1	A0A0B4KEH0		0	553990229	0	0.005941	42.77	0.00101197	2	903.515	0.904421	452.261	19.3554	0
	High	DSTLImQLLR	2	5	3	A0A0B4KEH0;CON_00696435.1;CON_00703110.1	M6(Oxidation)	0	22653930	0	0.0001271	38.31	0.00219142	2	1205.66	-0.274642	603.331	52.1867	0
	High	DNLTLWTSDTQGDEAEPQEGGDN	1	1	1	A0A0B4KEH0		0	0	0	6.17e-05	16.55	0.0287702	2	2492.03	-1.28987	1246.52	107.564	0
	High	MKGDYYR	1	2	2	CON_00703110.1;A0A0B4KEH0		0	5.69506e+06	0	0.002308	13.34	0.296606	2	932.43	0.719673	466.719	15.7391	1
M9PG76	60S acidic ribosomal protein P0 OS=Drosophila melanogaster OX=7227 GN=RpLP0 PE=3 SV=1 - [M9PG76_DROME]	2868.11	2.50161e+09	83	62.15	1	17	17	317	34.1809	6.94678
	A2	Sequence	# PSMs	# Proteins	# Protein Groups	Protein Group Accessions	Modifications	ΔCn	Area	q-Value	PEP	IonScore	Exp Value	Charge	MH+ [Da]	ΔM [ppm]	m/z [Da]	RT [min]	# Missed Cleavages
	High	FAAAASASAAPAAGGATEK	9	1	1	M9PG76		0	1686514848	0	2.616e-10	90.46	1.16035e-08	2	1619.8	1.54212	810.406	43.1435	0
	High	FQQGVANLAAVcLSVGYPTIASAPHSIANGFK	1	1	1	M9PG76	C12(Carbamidomethyl)	0	1.85786e+08	0	3.667e-15	89.59	1.62653e-08	3	3288.69	1.16026	1096.9	111.37	0
	High	NLLAIAATTEVEFK	36	1	1	M9PG76		0	2.87406e+08	0	3.24e-09	87.66	1.98819e-08	2	1519.83	-1.76291	760.421	64.1064	0
	High	TSFFQALSIPTK	2	1	1	M9PG76		0	2478794224	0	4.222e-07	83.03	5.02714e-08	2	1339.73	1.69555	670.368	48.6424	0
	High	VVELFDEFPK	2	1	1	M9PG76		0	2388550651	0	5.35e-06	77.32	3.03979e-07	2	1222.64	0.352154	611.822	47.0916	0
	High	GTIEIINDVPILKPGDK	4	1	1	M9PG76		0	2637478680	0	2.251e-10	76.13	1.49925e-07	3	1822.03	0.702008	608.016	45.5244	1
	High	GHLENNPQLEK	4	1	1	M9PG76		0	664108464	0	2.011e-07	74.78	4.93999e-07	2	1278.64	0.55956	639.826	17.2398	0
	High	AIRGHLENNPQLEK	6	1	1	M9PG76		0	7.42238e+08	0	1.312e-06	71.88	1.25835e-06	2	1618.87	-0.173606	809.937	26.9296	1
	High	cFIVGADNVGSK	2	1	1	M9PG76	C1(Carbamidomethyl)	0	907119180	0	1.325e-07	68.66	1.57928e-06	2	1266.61	-0.0739592	633.811	32.3902	0
	High	VRAPARPGAIAPLHVIIPAQNTGLGPEK	4	1	1	M9PG76		0	2387418640	0	2.512e-13	60.78	1.67121e-06	3	2843.64	-0.102875	948.55	36.0204	2
	High	GLAVVLMGK	2	1	1	M9PG76		0	964140128	0	0.0001165	46.42	0.00033293	2	887.538	-0.382895	444.273	37.6804	0
	High	GDLAEVRDK	3	1	1	M9PG76		0	743154092	0	0.000216	45.16	0.000364223	2	1002.52	0.507675	501.765	20.9035	1
	High	EYIKDPSK	1	1	1	M9PG76		0	2.3779e+07	0	0.0005471	38.12	0.00165733	2	979.51	0.60959	490.259	21.6273	1
	High	GNVGFVFTK	2	1	1	M9PG76		0	1.76466e+09	0	0.002393	36.58	0.00241765	2	968.521	0.845916	484.764	34.5837	0
	High	APARPGAIAPLHVIIPAQNTGLGPEK	2	1	1	M9PG76		0	194097109	0	9.786e-10	31.76	0.00153366	3	2588.47	1.22497	863.495	76.0581	1
	High	TSLRGLAVVLMGK	1	1	1	M9PG76		0	18161342	0	7.327e-07	29.59	0.00653908	3	1344.8	-0.540535	448.939	82.9117	1
	High	GDLAEVR	2	1	1	M9PG76		0	4.11298e+07	0.002	0.07908	27.84	0.00904404	2	759.401	1.276	380.204	27.0122	0
Q9W0A8	FI01658p OS=Drosophila melanogaster OX=7227 GN=RpL23A PE=1 SV=1 - [Q9W0A8_DROME]	1137.49	2.4814e+09	42	37.91	1	15	15	277	29.4451	10.9458
	A2	Sequence	# PSMs	# Proteins	# Protein Groups	Protein Group Accessions	Modifications	ΔCn	Area	q-Value	PEP	IonScore	Exp Value	Charge	MH+ [Da]	ΔM [ppm]	m/z [Da]	RT [min]	# Missed Cleavages
	High	KIEDNNTLVFLTHLR	7	1	1	Q9W0A8		0	4093462232	0	3.741e-10	91.76	8.60181e-09	2	1813	1.62719	907.003	79.1633	1
	High	AVALLNAK	2	1	1	Q9W0A8		0	1311770168	0	0.0004295	67.71	9.31886e-07	2	799.504	0.365913	400.256	39.4555	0
	High	IEDNNTLVFLTHLR	2	1	1	Q9W0A8		0	211963844	0	7.087e-07	66.62	3.57144e-06	3	1684.9	-0.684561	562.305	90.4733	0
	High	VNVLIRPDGQK	4	1	1	Q9W0A8		0	1849975702	0	2.57e-07	63.42	2.41144e-06	2	1238.72	0.881996	619.865	24.5702	1
	High	LARDYDALDIANK	4	1	1	Q9W0A8		0	457719048	0	7.855e-08	59.03	1.83788e-05	2	1477.77	3.6161	739.389	31.4733	1
	High	NRMDAYNIIK	4	1	1	Q9W0A8		0	295489063	0	2.457e-05	55.91	3.06456e-05	2	1237.64	1.25675	619.322	28.5006	1
	High	EAAPSAAKPAAAAPK	1	1	1	Q9W0A8		0	2.82087e+06	0	0.0002062	53.82	5.89235e-05	2	1350.74	-0.243581	675.872	24.1308	1
	High	DYDALDIANK	2	1	1	Q9W0A8		0	1105912166	0	4.827e-05	49.23	0.000117011	2	1137.54	0.530071	569.275	37.4196	0
	High	YPLTTEAAmK	2	1	1	Q9W0A8	M9(Oxidation)	0	143861208	0	3.879e-05	45.63	0.000214719	2	1140.56	-0.42094	570.784	24.1673	0
	High	AVALLNAKK	2	1	1	Q9W0A8		0	51239693	0	0.000203	45.25	0.00015524	2	927.599	0.250342	464.303	25.5935	1
	High	VNVLIRPDGQKK	3	1	1	Q9W0A8		0	328308416	0	6.23e-05	42.77	0.000224589	2	1366.82	-0.629107	683.911	29.687	2
	High	YPLTTEAAMK	1	1	1	Q9W0A8		0	208067184	0	2.772e-05	39.79	0.00133292	2	1124.56	-0.823817	562.786	29.0529	0
	High	IRTNVHFR	2	1	1	Q9W0A8		0	1.50075e+09	0	0.0004944	39.71	0.00193499	2	1042.59	-0.243375	521.799	16.5965	1
	High	KPQSVLAK	3	1	1	Q9W0A8		0	705758316	0	0.0001468	38.15	0.000933963	2	870.541	-0.0152228	435.774	7.26849	1
	High	MDAYNIIK	2	1	1	Q9W0A8		0	492899780	0	0.005276	35.23	0.0025193	2	967.491	-0.340735	484.249	33.8451	0
	High	VLAGKKPQSVLAK	1	1	1	Q9W0A8		0	32099505	0	7.252e-05	20.46	0.0148417	3	1338.85	0.216058	446.954	17.7374	2
M9MRC9	60S ribosomal protein L27a OS=Drosophila melanogaster OX=7227 GN=RpL27A PE=2 SV=1 - [M9MRC9_DROME]	189.28	2462352103	16	26.85	1	5	5	149	17.0113	10.7114
	A2	Sequence	# PSMs	# Proteins	# Protein Groups	Protein Group Accessions	Modifications	ΔCn	Area	q-Value	PEP	IonScore	Exp Value	Charge	MH+ [Da]	ΔM [ppm]	m/z [Da]	RT [min]	# Missed Cleavages
	High	GHLPARPVIVK	5	1	1	M9MRC9		0	3752935608	0	0.0004364	53.28	1.45667e-05	2	1186.74	-0.0694441	593.875	20.089	1
	High	APVIDLVK	3	1	1	M9MRC9		0	2083266121	0	0.0004042	43.02	7.23383e-05	2	854.535	0.241462	427.771	34.3375	0
	High	FRPEINLDK	3	1	1	M9MRC9		0	1550854580	0	0.000186	40.43	0.00181147	3	1131.62	0.903653	377.877	28.0146	1
	High	YHPGYFGK	3	1	1	M9MRC9		0	953388100	0	0.0003688	30.38	0.00650517	2	968.462	-0.105727	484.735	20.0904	0
	High	LLGRGHLPARPVIVK	2	1	1	M9MRC9		0	255095382	0.001	0.02782	9.36	0.115603	4	1626.03	1.0093	407.264	24.4154	2
X2JGP4	Protein disulfide-isomerase OS=Drosophila melanogaster OX=7227 GN=Pdi PE=3 SV=1 - [X2JGP4_DROME]	4475.39	2.44809e+09	128	80.44	1	38	38	496	55.7464	4.81787
	A2	Sequence	# PSMs	# Proteins	# Protein Groups	Protein Group Accessions	Modifications	ΔCn	Area	q-Value	PEP	IonScore	Exp Value	Charge	MH+ [Da]	ΔM [ppm]	m/z [Da]	RT [min]	# Missed Cleavages
	High	VLVSSNFESVALDK	5	1	1	X2JGP4		0	2480355170	0	4.592e-08	135.06	5.16176e-13	2	1507.8	-1.93025	754.402	81.977	0
	High	VANALDSFVFGVSSNADVIAK	11	1	1	X2JGP4		0	2.34013e+06	0	7.924e-14	120.97	1.21575e-11	2	2124.1	-0.600931	1062.55	118.536	0
	High	FAQVQSLPLIVDFNHESASK	2	1	1	X2JGP4		0	2006333578	0	7.764e-12	108.02	2.57939e-10	2	2230.15	-0.836806	1115.58	96.9353	0
	High	FLDANGEVADSEPVEETEEEEEAPKKDEL	4	1	1	X2JGP4		0	2.6981e+09	0	1.174e-13	96.36	9.59507e-10	3	3248.45	0.384553	1083.49	81.3238	2
	High	YKPESDDLSAETIEAFLK	3	1	1	X2JGP4		0	2.00475e+09	0	3.107e-10	94.78	5.22275e-09	2	2056.02	3.24176	1028.51	102.292	1
	High	SVLVEFYAPWcGHcK	5	1	1	X2JGP4	C11(Carbamidomethyl); C14(Carbamidomethyl)	0	1160609253	0	1.181e-08	90.1	7.72017e-09	2	1852.86	2.31152	926.931	88.3491	0
	High	VIDFNLDRTLDDFVK	4	1	1	X2JGP4		0	2.16582e+09	0	3.394e-10	85.36	4.10411e-08	2	1809.94	0.431585	905.473	108.249	1
	High	SVFEGELNEENLK	2	1	1	X2JGP4		0	1368231896	0	2.466e-06	81.86	7.42856e-08	2	1507.73	0.428269	754.368	37.067	0
	High	KFAQVQSLPLIVDFNHESASK	5	1	1	X2JGP4		0	699375302	0	5.706e-10	81.18	9.41168e-08	2	2358.25	0.554789	1179.63	83.9708	1
	High	MDSTANELESIK	10	1	1	X2JGP4		0	865646300	0	1.17e-07	80.09	9.50105e-08	2	1337.63	0.290605	669.317	32.4846	0
	High	QLIADNEFVLVEFYAPWcGHcK	1	1	1	X2JGP4	C18(Carbamidomethyl); C21(Carbamidomethyl)	0	11156361	0	8.68e-10	78.23	1.60085e-07	3	2696.27	2.44728	899.428	122.448	0
	High	VEEGVLVATVDNFK	4	1	1	X2JGP4		0	823463109	0	3.471e-09	76.01	4.61124e-07	2	1519.8	-2.32319	760.402	90.1561	0
	High	QHLLSQELPEDWDK	4	1	1	X2JGP4		0	636107552	0	1.104e-09	74.62	3.12355e-07	2	1737.84	-0.295597	869.426	37.376	0
	High	SVFEGELNEENLKK	4	1	1	X2JGP4		0	676337234	0	5.027e-08	73.96	5.78579e-07	2	1635.82	-1.32117	818.414	55.5026	1
	High	QAADIIAWVTK	2	1	1	X2JGP4		0	1317974997	0	7.743e-07	66.85	3.48017e-06	2	1215.67	0.605832	608.341	47.8584	0
	High	QLAPIYDQLAEK	2	1	1	X2JGP4		0	1018066517	0	5.545e-06	66.75	3.71974e-06	2	1388.74	0.213048	694.875	39.1057	0
	High	YKDNEDIVIAK	4	1	1	X2JGP4		0	761377936	0	3.569e-07	66.22	4.22643e-06	2	1307.68	0.31094	654.346	37.7886	1
	High	DNGVVLFKPFDDKK	4	1	1	X2JGP4		0	675170280	0	9.252e-09	65.03	5.71573e-06	2	1621.86	0.555719	811.433	36.349	2
	High	DNEIAIIGFFK	13	1	1	X2JGP4		0	845883008	0	1.314e-05	61.72	9.15248e-06	2	1266.67	-0.314485	633.84	59.3767	0
	High	AAQQLAEK	2	1	1	X2JGP4		0	23153055	0	6.054e-05	61.47	6.16618e-06	2	858.467	-0.992059	429.737	8.89863	0
	High	DLTSVADAEQFLK	2	1	1	X2JGP4		0	1898418025	0	3.139e-06	61.08	1.27892e-05	2	1436.73	-0.31693	718.867	103.262	0
	High	YKPESDDLSAETIEAFLKK	4	1	1	X2JGP4		0	172168980	0	8.571e-08	58.84	2.65806e-05	3	2184.11	-0.111986	728.707	90.0957	2
	High	DNEDIVIAK	2	1	1	X2JGP4		0	428881136	0	3.021e-05	57.3	2.62554e-05	2	1016.53	0.965806	508.767	29.1874	0
	High	VDATVEGELAEQYAVR	5	1	1	X2JGP4		0	1.33161e+08	0	3.957e-07	50.02	0.00012791	2	1749.86	-3.51501	875.433	90.4093	0
	High	SGSPVEYSGGR	2	1	1	X2JGP4		0	206534966	0	1.385e-05	49.26	6.04742e-05	2	1095.51	-0.160697	548.257	20.2662	0
	High	IFEFFGMNK	2	1	1	X2JGP4		0	2.93326e+08	0	3.909e-05	48.86	0.000167072	2	1132.55	-0.0292741	566.778	48.7932	0
	High	SHLLFFVSR	3	1	1	X2JGP4		0	1245387760	0	0.0005055	48.37	0.000180477	3	1105.62	0.992112	369.21	37.5386	0
	High	ISSFPTIK	3	1	1	X2JGP4		0	1484700184	0	0.001968	46.93	0.00010037	2	892.515	0.776084	446.761	31.3538	0
	High	KYRDDILFVTISSDEEDHTR	3	1	1	X2JGP4		0	162826012	0	9.362e-11	44.49	0.000519222	3	2439.18	0.572979	813.732	69.8164	2
	High	TLDDFVK	1	1	1	X2JGP4		0	2.53139e+08	0	0.003154	43.34	0.000261848	2	837.435	0.0585515	419.221	53.5724	0
	High	ALAPEYAK	1	1	1	X2JGP4		0	5.912e+08	0	0.00491	34.03	0.00506069	2	862.467	0.536241	431.737	31.2925	0
	High	LIKLEEDMAK	2	1	1	X2JGP4		0	31594182	0	8.227e-05	22.76	0.109905	3	1189.65	-2.16147	397.221	47.689	1
	High	VIDFNLDR	1	1	1	X2JGP4		0	534006368	0	0.006371	20.77	0.154105	2	991.522	1.62898	496.265	37.3617	0
	High	YRDDILFVTISSDEEDHTR	1	1	1	X2JGP4		0	7333222	0	3.108e-08	16.35	0.214359	4	2311.08	-0.0616291	578.526	82.2881	1
	High	QAADIIAWVTKK	1	1	1	X2JGP4		0	4.55167e+07	0	6.467e-05	13.11	0.461776	3	1343.77	0.0162576	448.594	79.6798	1
	High	QHLLSQELPEDWDKNPVK	1	1	1	X2JGP4		0	0	0	2.098e-05	12.31	0.884171	4	2176.11	0.791297	544.782	68.799	1
	High	EEVPTIR	2	1	1	X2JGP4		0	1130864872	0.002	0.05766	48.95	6.62222e-05	2	843.458	1.20355	422.233	24.8287	0
	High	IFGGSIK	1	1	1	X2JGP4		0	911119858	0.002	0.08532	34.14	0.0004433	2	721.425	1.04672	361.216	24.6164	0
X2JB48	ADP/ATP translocase OS=Drosophila melanogaster OX=7227 GN=sesB PE=1 SV=1 - [X2JB48_DROME]	2420.65	2444740127	100	78.26	2	26	26	299	32.8881	9.77393
	A2	Sequence	# PSMs	# Proteins	# Protein Groups	Protein Group Accessions	Modifications	ΔCn	Area	q-Value	PEP	IonScore	Exp Value	Charge	MH+ [Da]	ΔM [ppm]	m/z [Da]	RT [min]	# Missed Cleavages
	High	YFAGNLASGGAAGATSLcFVYPLDFAR	2	1	1	X2JB48	C18(Carbamidomethyl)	0	396708868	0	1.839e-14	110.97	1.09577e-10	3	2796.35	1.83045	932.788	61.6423	0
	High	GGQREFTGLGNcLTK	4	1	1	X2JB48	C12(Carbamidomethyl)	0	772825012	0	3.165e-09	76.91	3.65649e-07	2	1637.81	-0.403936	819.407	28.9056	1
	High	GTGGAFVLVLYDEIK	7	1	1	X2JB48		0	3.68607e+07	0	3.215e-09	69.98	1.1754e-06	2	1581.85	0.605482	791.43	122.436	0
	High	DFAAGGISAAVSK	8	1	1	X2JB48		0	812248944	0	7.505e-07	69.02	1.71054e-06	2	1193.62	-0.626044	597.311	36.8204	0
	High	LLLQVQHISK	4	1	1	X2JB48		0	1721334896	0	1.285e-05	61.91	1.67484e-06	2	1178.73	0.640232	589.867	28.8531	0
	High	YFPTQALNFAFK	2	2	1	X2JB48		0	3327872160	0	6.139e-06	60.47	1.73652e-05	2	1446.74	0.143486	723.875	51.0285	0
	High	TAVAPIER	9	2	1	X2JB48		0	1083819172	0	0.0001575	60.09	6.46463e-06	2	856.489	0.658632	428.748	21.2497	0
	High	KATEVIYK	2	1	1	X2JB48		0	2.02855e+08	0	4.569e-05	59.1	7.68918e-06	2	951.551	0.34242	476.279	15.4612	1
	High	GAFSNILR	2	1	1	X2JB48		0	1753188625	0	0.007756	58.85	1.62244e-05	2	877.489	0.127684	439.248	33.8986	0
	High	AAYFGFYDTAR	2	1	1	X2JB48		0	435538504	0	4.966e-06	56.6	2.30809e-05	2	1281.59	-0.198263	641.298	41.3456	0
	High	QVFLGGVDK	2	1	1	X2JB48		0	1178887280	0	0.0007833	54.28	4.55365e-05	2	962.532	1.41054	481.77	30.1277	0
	High	SDGIVGLYR	2	1	1	X2JB48		0	3.97301e+08	0	0.0001125	52.23	6.73213e-05	2	979.521	0.47523	490.264	33.9345	0
	High	QEGTGAFFK	1	1	1	X2JB48		0	633567637	0	0.000687	51.63	3.95064e-05	2	984.479	0.425778	492.743	27.8	0
	High	TRLAADTGK	3	1	1	X2JB48		0	25490468	0	1.853e-05	51.06	0.00011869	2	932.516	0.0842289	466.762	5.21422	1
	High	NTLHcWATIAK	4	1	1	X2JB48	C5(Carbamidomethyl)	0	1136264766	0	5.02e-08	48.86	0.000194375	2	1314.66	1.51289	657.836	27.2397	0
	High	GMVDcFIRIPK	4	1	1	X2JB48	C5(Carbamidomethyl)	0	353795321	0	1.606e-05	48.82	0.000194862	3	1335.69	0.435603	445.902	41.0309	1
	High	DFDAVGFVK	3	1	1	X2JB48		0	2253159596	0	8.164e-05	48.56	0.000137923	2	997.499	-0.0936033	499.253	42.487	0
	High	EFTGLGNcLTK	2	1	1	X2JB48	C8(Carbamidomethyl)	0	1008473232	0	9.304e-06	48.13	0.000180733	2	1239.6	0.552181	620.306	34.7416	0
	High	GMVDcFIR	2	1	1	X2JB48	C5(Carbamidomethyl)	0	203553192	0	0.0007608	47.47	7.69961e-05	2	997.459	-0.0472353	499.233	37.9923	0
	High	GTGGAFVLVLYDEIKK	17	1	1	X2JB48		0	1.13743e+09	0	3.082e-07	43.52	0.00054245	3	1709.95	1.33794	570.655	102.714	1
	High	GmVDcFIRIPK	3	1	1	X2JB48	M2(Oxidation); C5(Carbamidomethyl)	0	84160848	0	2.441e-05	39.18	0.00179964	2	1351.69	0.65771	676.347	65.0423	1
	High	GNLANVIR	9	2	1	X2JB48		0	1702855566	0	0.005681	33.42	0.00327591	2	856.5	0.445387	428.754	26.287	0
	High	EQGFSSFWR	1	2	1	X2JB48		0	1356977964	0	0.003903	32.52	0.00232299	2	1143.52	-0.582007	572.264	78.2315	0
	High	GAFSNILRGTGGAFVLVLYDEIKK	1	1	1	X2JB48		0	8.62515e+06	0	2.719e-07	15.46	0.125156	4	2568.43	2.58147	642.862	123.416	2
	High	GKDFDAVGFVK	2	1	1	X2JB48		0	28250347	0	0.003042	13.99	0.516737	3	1182.62	0.593362	394.877	54.5908	1
	High	GFGVSVQGIIIYR	1	1	1	X2JB48		0	1.34579e+06	0	1.5e-05	11.81	0.7185	2	1408.79	-0.292575	704.901	127.519	0
	High	GMLPDPK	1	1	1	X2JB48		0	0	0.003	0.1117	8.13	0.153451	2	757.392	0.32589	379.199	39.8252	0
A0A0B4K6N1	40S ribosomal protein S8 OS=Drosophila melanogaster OX=7227 GN=RpS8 PE=3 SV=1 - [A0A0B4K6N1_DROME]	2128.71	2431314330	66	64.9	1	21	21	208	23.7449	10.4771
	A2	Sequence	# PSMs	# Proteins	# Protein Groups	Protein Group Accessions	Modifications	ΔCn	Area	q-Value	PEP	IonScore	Exp Value	Charge	MH+ [Da]	ΔM [ppm]	m/z [Da]	RT [min]	# Missed Cleavages
	High	HAQKEDENDVLTK	3	1	1	A0A0B4K6N1		0	549761660	0	1.564e-09	112.51	5.80685e-11	2	1526.74	-0.983603	763.875	14.4479	1
	High	LETGNFAWASEGVAR	1	1	1	A0A0B4K6N1		0	880054816	0	1.699e-10	111.57	9.12581e-11	2	1607.78	-0.628359	804.394	41.5165	0
	High	TRIADVVYNASNNELVR	4	1	1	A0A0B4K6N1		0	1298125528	0	1.519e-12	103.14	9.02637e-10	2	1934	-2.97197	967.505	73.1701	1
	High	ALRLETGNFAWASEGVAR	4	1	1	A0A0B4K6N1		0	393887012	0	7.263e-11	102.38	1.55797e-09	2	1948.01	0.912417	974.506	41.723	1
	High	IADVVYNASNNELVR	3	1	1	A0A0B4K6N1		0	1099021160	0	9.274e-09	96.17	4.69807e-09	2	1676.86	1.08348	838.935	71.1112	0
	High	LETGNFAWASEGVARK	4	1	1	A0A0B4K6N1		0	1079989798	0	2.013e-11	91.92	9.2547e-09	2	1735.87	-0.933197	868.441	35.011	1
	High	VEQALEDQFTSGR	2	1	1	A0A0B4K6N1		0	2181029894	0	3.214e-07	78.29	1.65301e-07	2	1479.71	0.635478	740.358	32.8485	0
	High	QWYEAHYVLPLGR	3	1	1	A0A0B4K6N1		0	1.47842e+08	0	3.48e-07	73.95	6.86633e-07	2	1631.84	1.42256	816.421	41.9838	0
	High	YGKVEQALEDQFTSGR	3	1	1	A0A0B4K6N1		0	99605322	0	3.26e-10	72.77	6.02428e-07	2	1827.89	-1.06122	914.446	36.0413	1
	High	HAQKEDENDVLTKK	4	1	1	A0A0B4K6N1		0	36773422	0	6.049e-10	72.57	7.49789e-07	3	1654.84	-0.841401	552.284	12.5333	2
	High	FELGRPAANTK	4	1	1	A0A0B4K6N1		0	1.17957e+09	0	1.111e-06	66.71	3.05025e-06	2	1203.65	1.02047	602.328	22.4613	1
	High	RKFELGRPAANTK	6	1	1	A0A0B4K6N1		0	1053142240	0	0.0006615	59.3	1.7271e-05	2	1487.85	0.549118	744.426	16.3431	3
	High	ALRLETGNFAWASEGVARK	3	1	1	A0A0B4K6N1		0	620709344	0	9.255e-11	56.81	3.59575e-05	4	2076.1	0.549517	519.78	36.5379	2
	High	NSIVVIDATPFRQWYEAHYVLPLGR	4	1	1	A0A0B4K6N1		0	751327653	0	6.82e-13	55.08	3.58577e-05	3	2944.55	-0.276988	982.187	55.2781	1
	High	NSIVVIDATPFR	2	1	1	A0A0B4K6N1		0	791660328	0	1.608e-05	52.79	8.67928e-05	2	1331.73	0.563359	666.37	44.5212	0
	High	SDGYILEGK	2	1	1	A0A0B4K6N1		0	1330588128	0	0.0001182	52.47	5.4359e-05	2	981.489	0.275062	491.248	27.5171	0
	High	ELEFYLK	3	1	1	A0A0B4K6N1		0	1503914196	0	0.003093	36.31	0.00130975	2	941.499	0.799247	471.253	40.4882	0
	High	QWYEAHYVLPLGRK	3	1	1	A0A0B4K6N1		0	143258184	0	6.74e-05	32.94	0.00856249	3	1759.93	0.514126	587.314	67.4031	1
	High	ILAcISSRPGQcGR	3	1	1	A0A0B4K6N1	C4(Carbamidomethyl); C12(Carbamidomethyl)	0	3365361788	0	0.000121	31.45	0.0100976	3	1574.79	0.559976	525.602	23.9504	1
	High	NSIVVIDATPFRQWYEAHYVLPLGRK	4	1	1	A0A0B4K6N1		0	1747551308	0	1.009e-07	23.61	0.0287438	4	3072.65	1.0613	768.917	105.331	2
	High	KFELGRPAANTK	1	1	1	A0A0B4K6N1		0	102627705	0	0.001005	14.81	0.566584	3	1331.74	-0.00387122	444.586	26.5161	2
CON_00696435.1	(Bos taurus) Gene_Symbol=YWHAE 14-3-3 protein epsilon - [SWISS-PROT:P62261|ENSEMBL:ENSBTAP00000007442|REFSEQ:NP_776916]	478.987	2.35635e+09	14	17.25	1	2	4	255	29.1554	4.7417
	A2	Sequence	# PSMs	# Proteins	# Protein Groups	Protein Group Accessions	Modifications	ΔCn	Area	q-Value	PEP	IonScore	Exp Value	Charge	MH+ [Da]	ΔM [ppm]	m/z [Da]	RT [min]	# Missed Cleavages
	High	AAFDDAIAELDTLSEESYK	6	1	1	CON_00696435.1		0	2.60629e+09	0	6.292e-10	81.02	6.6417e-08	2	2087.96	-0.471316	1044.49	126.868	0
	High	NLLSVAYK	2	5	3	A0A0B4KEH0;CON_00696435.1;CON_00703110.1		0	3404012112	0	0.0004714	58.1	7.82152e-06	2	907.525	0.196846	454.266	59.3895	0
	High	DSTLIMQLLR	3	5	3	A0A0B4KEH0;CON_00696435.1;CON_00703110.1		0	1.05876e+09	0	2.538e-05	55.59	4.14087e-05	2	1189.66	1.19346	595.335	56.1169	0
	High	DSTLImQLLR	2	5	3	A0A0B4KEH0;CON_00696435.1;CON_00703110.1	M6(Oxidation)	0	22653930	0	0.0001271	38.31	0.00219142	2	1205.66	-0.274642	603.331	52.1867	0
	High	NVIGARR	1	1	1	CON_00696435.1		0	4.2321e+07	0.009	0.3687	17.29	0.0839871	2	785.474	0.0985297	393.241	4.77763	1
Q53YH3	Calreticulin OS=Drosophila melanogaster OX=7227 GN=Calr PE=1 SV=1 - [Q53YH3_DROME]	1996.6	2.34663e+09	63	54.19	1	20	20	406	46.7792	4.57666
	A2	Sequence	# PSMs	# Proteins	# Protein Groups	Protein Group Accessions	Modifications	ΔCn	Area	q-Value	PEP	IonScore	Exp Value	Charge	MH+ [Da]	ΔM [ppm]	m/z [Da]	RT [min]	# Missed Cleavages
	High	VESGNLEDDWDFLAPK	3	1	1	Q53YH3		0	1613902576	0	7.216e-12	123.99	3.67103e-12	2	1834.85	0.494915	917.929	53.6412	0
	High	HEQNIDcGGGYVK	4	1	1	Q53YH3	C7(Carbamidomethyl)	0	4.82832e+08	0	2.365e-09	98.48	6.38576e-10	2	1476.65	0.54938	738.831	19.7984	0
	High	SGTIFDNVLITDDVELAAK	3	1	1	Q53YH3		0	1.1226e+07	0	5.002e-09	93.94	7.54817e-09	2	2021.05	1.28796	1011.03	121.091	0
	High	FDGFSNEDKPLVVQFSVK	5	1	1	Q53YH3		0	1194170458	0	3.735e-08	88.66	2.17831e-08	2	2056.03	-2.16631	1028.52	90.9109	1
	High	KFDGFSNEDKPLVVQFSVK	4	1	1	Q53YH3		0	401356294	0	9.686e-08	82.54	1.02801e-07	2	2184.13	-2.8214	1092.57	79.4996	2
	High	VESGNLEDDWDFLAPKK	4	1	1	Q53YH3		0	778428304	0	3.694e-09	72.94	1.12557e-06	2	1962.94	-0.718583	981.975	45.966	1
	High	LFDcSLDQTDMHGESPYEIMFGPDIcGPGTK	1	1	1	Q53YH3	C4(Carbamidomethyl); C26(Carbamidomethyl)	0	1.59533e+08	0	5.255e-10	72.26	9.21153e-08	3	3517.5	-0.471318	1173.17	118.734	0
	High	KFDGFSNEDK	1	1	1	Q53YH3		0	3.62511e+07	0	7.684e-07	70.16	4.43361e-07	2	1186.54	0.387822	593.773	28.7049	1
	High	FVLTPGTFYNDAEADK	3	1	1	Q53YH3		0	3632067240	0	5.777e-08	69.39	1.35219e-06	2	1787.85	1.20053	894.429	46.5725	0
	High	EIcTLGFDLWQVK	5	1	1	Q53YH3	C3(Carbamidomethyl)	0	1.78123e+09	0	1.369e-06	61.84	9.03398e-06	2	1608.81	0.464164	804.909	115.349	0
	High	ENFDNENWEDTWIYSK	3	1	1	Q53YH3		0	1.23289e+09	0	4.45e-08	60.62	9.1031e-07	2	2089.88	-0.337205	1045.44	102.122	0
	High	KVHVIFSYK	3	1	1	Q53YH3		0	3.2918e+08	0	4.829e-05	52.19	6.52265e-05	3	1120.65	1.66072	374.223	22.4599	1
	High	DDVYTHFYTLIVRPDNTYEVLIDNEK	6	1	1	Q53YH3		0	1626580555	0	7.801e-11	44.39	0.000596821	4	3172.55	1.48569	793.893	58.4603	1
	High	VHVIFSYK	5	1	1	Q53YH3		0	428173548	0	0.0005749	44	0.000477729	2	992.557	0.59654	496.782	46.7238	0
	High	EAQDEVQRKKDEEEAK	4	1	1	Q53YH3		0	188830975	0	0.001885	43.34	0.000530647	2	1931.93	-2.1492	966.467	16.0059	3
	High	FVLTPGTFYNDAEADKGIQTSQDAR	1	1	1	Q53YH3		0	2.75735e+07	0	3.106e-11	43.17	0.000628942	3	2744.31	-2.36223	915.441	87.3365	1
	High	FDGFSNEDK	1	1	1	Q53YH3		0	1.59773e+07	0	0.0001621	31.59	0.00124817	2	1058.44	0.895413	529.725	40.3646	0
	High	QLDNPNYK	1	1	1	Q53YH3		0	8.24846e+07	0	0.0004593	26.72	0.0230903	2	991.485	0.677419	496.246	18.553	0
	High	FYAASRK	5	1	1	Q53YH3		0	6.29235e+07	0	0.007039	25.92	0.0140722	2	842.452	0.0850265	421.73	7.38606	1
	High	cKDDVYTHFYTLIVRPDNTYEVLIDNEK	1	1	1	Q53YH3	C1(Carbamidomethyl)	0	0	0	8.842e-08	9.16	1.5046	4	3460.68	2.09879	865.926	107.827	2
A0A0B4LG52	GEO08239p1 OS=Drosophila melanogaster OX=7227 GN=RpS16 PE=2 SV=1 - [A0A0B4LG52_DROME]	890.447	2.33765e+09	35	71.62	1	13	13	148	16.7642	10.1694
	A2	Sequence	# PSMs	# Proteins	# Protein Groups	Protein Group Accessions	Modifications	ΔCn	Area	q-Value	PEP	IonScore	Exp Value	Charge	MH+ [Da]	ΔM [ppm]	m/z [Da]	RT [min]	# Missed Cleavages
	High	VSGGGHVAQIYAIR	4	1	1	A0A0B4LG52		0	1207349755	0	1.775e-11	99.76	1.63807e-09	2	1427.78	0.859817	714.392	26.9331	0
	High	RREPVQAVQVFGR	5	1	1	A0A0B4LG52		0	3086099196	0	9.084e-11	82.11	1.00274e-07	3	1541.87	0.672721	514.627	24.6737	2
	High	TATAVAYcK	2	1	1	A0A0B4LG52	C8(Carbamidomethyl)	0	116395330	0	0.0002012	51.63	3.95064e-05	2	984.483	1.17272	492.745	24.7788	0
	High	LQEPLLLLGK	2	1	1	A0A0B4LG52		0	2468011400	0	3.943e-05	51.46	7.12804e-06	2	1123.71	0.292428	562.358	88.8418	0
	High	TLLVGDPRR	2	1	1	A0A0B4LG52		0	411028752	0	0.0001298	47.4	6.18698e-05	3	1026.61	0.5269	342.874	24.2601	1
	High	ALVAFYQK	2	1	1	A0A0B4LG52		0	1458841134	0	0.001645	46.99	0.000136991	2	939.53	0.489326	470.269	32.7919	0
	High	DILVQYDR	3	1	1	A0A0B4LG52		0	1138165345	0	0.0009735	44.48	0.000461604	2	1021.53	0.275542	511.269	34.6933	0
	High	RGNGLLK	1	1	1	A0A0B4LG52		0	2.02524e+08	0	0.00205	42.36	0.000121961	2	757.468	-0.319927	379.237	5.27991	1
	High	VNGRPLEQIEPK	3	1	1	A0A0B4LG52		0	6.97596e+08	0	0.001683	27.45	0.0257239	2	1379.77	2.56311	690.388	39.314	1
	High	RREPVQAVQVFGRK	2	1	1	A0A0B4LG52		0	558605792	0	0.0002106	16.05	0.248313	4	1669.96	0.28455	418.246	31.0718	3
	High	FAGVDIR	2	1	1	A0A0B4LG52		0	1.02554e+09	0.001	0.02071	51.74	4.18678e-05	2	777.426	0.929638	389.217	30.4521	0
	High	KFGGPGAR	4	1	1	A0A0B4LG52		0	8.15254e+07	0.001	0.01995	38.13	0.00129205	2	789.436	-0.797506	395.222	4.14282	1
	High	TLLVGDPR	3	1	1	A0A0B4LG52		0	1074797720	0.003	0.1062	33.21	0.0028413	2	870.505	0.198621	435.756	29.4039	0
G3M3A2	Ribosomal protein S3, isoform B OS=Drosophila melanogaster OX=7227 GN=RpS3 PE=1 SV=1 - [G3M3A2_DROME]	2889.54	2.31876e+09	106	84.96	1	32	32	246	27.4536	9.39307
	A2	Sequence	# PSMs	# Proteins	# Protein Groups	Protein Group Accessions	Modifications	ΔCn	Area	q-Value	PEP	IonScore	Exp Value	Charge	MH+ [Da]	ΔM [ppm]	m/z [Da]	RT [min]	# Missed Cleavages
	High	ELAEDGYSGVEVR	8	1	1	G3M3A2		0	1004748964	0	5.812e-09	131.86	5.63659e-13	2	1423.67	-0.129171	712.339	32.9608	0
	High	FVDGLMIHSGDPcNDYVETATR	5	1	1	G3M3A2	C13(Carbamidomethyl)	0	864306086	0	1.58e-14	98.92	5.57814e-10	2	2497.11	0.980489	1249.06	83.4124	0
	High	KPLPDNVSVVEPKEEK	6	1	1	G3M3A2		0	9.3517e+08	0	1.58e-10	90.19	1.05291e-08	2	1807.98	-0.44561	904.493	43.4048	2
	High	FVSDGIFKAELNEFLTR	6	1	1	G3M3A2		0	4.20749e+08	0	3.881e-11	82.62	1.08309e-07	2	1986.03	-0.405365	993.52	114.242	1
	High	AELNEFLTRELAEDGYSGVEVR	3	1	1	G3M3A2		0	229743067	0	1.902e-11	76.62	3.20123e-07	3	2497.22	0.77167	833.079	102.414	1
	High	mNANLPISK	2	1	1	G3M3A2	N-Term(Acetyl)	0	4.50129e+08	0	5.305e-05	66.1	2.62654e-06	2	1029.54	0.400598	515.274	41.4796	0
	High	IPPPSKPLDDLSEAK	5	1	1	G3M3A2		0	2930367384	0	7.753e-09	64.49	4.26758e-06	2	1606.87	-0.335833	803.938	30.5542	1
	High	KPLPDNVSVVEPK	6	1	1	G3M3A2		0	724163520	0	0.0001634	60.95	1.20931e-05	3	1421.8	0.0637539	474.605	28.4369	1
	High	PLPDNVSVVEPKEEK	1	1	1	G3M3A2		0	3.90916e+07	0	3.898e-06	60.58	1.2031e-05	3	1679.88	-0.306347	560.633	54.0193	1
	High	GLcAIAQAESLR	2	1	1	G3M3A2	C3(Carbamidomethyl)	0	1.92469e+09	0	2.846e-06	56.51	3.05999e-05	2	1288.67	0.0224871	644.838	36.1242	0
	High	AELNEFLTR	2	1	1	G3M3A2		0	2101214770	0	0.001443	56.03	3.84168e-05	2	1092.57	0.853251	546.788	37.1986	0
	High	LTGGLAVR	2	1	1	G3M3A2		0	1136327970	0	0.002775	53.5	5.20386e-05	2	786.483	-0.385952	393.745	23.5048	0
	High	RAcYGVLR	2	1	1	G3M3A2	C3(Carbamidomethyl)	0	6.20067e+08	0	5.76e-05	50.72	0.000104633	2	994.526	0.672818	497.767	18.6911	1
	High	IYETPETEYK	1	1	1	G3M3A2		0	1237120904	0	8.106e-05	50.5	7.04088e-05	2	1272.6	0.641227	636.804	26.4694	0
	High	FVDGLmIHSGDPcNDYVETATR	1	1	1	G3M3A2	M6(Oxidation); C13(Carbamidomethyl)	0	265477616	0	5.829e-08	49.52	4.02071e-05	3	2513.11	0.46647	838.374	77.4544	0
	High	TQQVLGEK	2	1	1	G3M3A2		0	89391638	0	0.0001591	47.8	0.000304534	2	902.495	1.19176	451.751	16.4305	0
	High	VmLPYDPK	2	1	1	G3M3A2	M2(Oxidation)	0	1.07541e+08	0	0.001049	45.62	0.000459214	2	978.498	1.04125	489.752	53.6089	0
	High	QGVLGIK	1	1	1	G3M3A2		0	599106448	0	0.009096	44.83	6.90588e-05	2	714.451	0.801054	357.729	24.9785	0
	High	PLDDLSEAK	2	1	1	G3M3A2		0	2.42575e+08	0	4.367e-05	44.13	0.00053705	2	987.501	1.61197	494.254	25.9415	0
	High	VTPSRTEIIIMATK	9	1	1	G3M3A2		0	1255475990	0	0.0001685	44.1	0.000369593	2	1559.88	-0.00342454	780.445	32.5734	1
	High	RFNFETGR	2	1	1	G3M3A2		0	2.16856e+08	0	4.003e-05	43.76	0.000437556	2	1026.51	0.755374	513.76	21.9519	1
	High	IYETPETEYKIPPPSKPLDDLSEAK	5	1	1	G3M3A2		0	432736346	0	8.079e-09	43.58	0.000668759	3	2860.45	-0.00341374	954.155	38.8669	2
	High	VTPSRTEIIImATK	2	1	1	G3M3A2	M11(Oxidation)	0	76252455	0	1.284e-05	42.72	0.000547928	2	1575.88	0.0474499	788.442	28.1904	1
	High	GcEVVVSGK	2	1	1	G3M3A2	C2(Carbamidomethyl)	0	1.06418e+08	0	0.0001725	42.47	0.000736111	2	934.467	0.522371	467.737	18.3629	0
	High	IRELTAMVQK	4	1	1	G3M3A2		0	379644417	0	4.61e-05	41.38	0.000844225	2	1188.68	0.168525	594.842	25.5495	1
	High	VMLPYDPK	2	1	1	G3M3A2		0	688963752	0	0.005439	37.69	0.00226387	2	962.502	0.72166	481.755	58.6119	0
	High	mNANLPISK	1	1	1	G3M3A2	N-Term(Acetyl); M1(Oxidation)	0	2.29413e+08	0	8.676e-05	36.37	0.00243362	2	1045.54	0.587851	523.271	58.6326	0
	High	FVSDGIFK	2	1	1	G3M3A2		0	1471822394	0	0.006517	35.22	0.00183371	2	912.483	0.736047	456.745	35.7102	0
	High	ELTAMVQK	2	1	1	G3M3A2		0	7.6631e+07	0	0.006322	34.28	0.00630793	2	919.493	1.35646	460.25	24.8414	0
	High	FNFETGRIELYAEK	3	1	1	G3M3A2		0	126600918	0	5.38e-05	30.92	0.0100328	2	1716.86	0.0403227	858.933	79.2231	1
	High	FVSDGIFKAELNEFLTRELAEDGYSGVEVR	1	1	1	G3M3A2		0	3.73491e+07	0	1.648e-10	29.62	0.015935	4	3390.67	-3.8002	848.424	126.159	2
	High	YIMESGAK	1	1	1	G3M3A2		0	123424044	0	0.00319	29.13	0.00806388	2	898.434	-0.175729	449.721	27.5565	0
	High	LTGGLAVRR	2	1	1	G3M3A2		0	568543020	0	0.001136	21.67	0.0432289	2	942.585	0.276925	471.796	18.7289	1
	High	IRELTAmVQK	1	1	1	G3M3A2	M7(Oxidation)	0	1.50312e+07	0	0.0006365	21.52	0.0958383	3	1204.67	-1.50099	402.228	30.2006	1
	High	RFNFETGRIELYAEK	5	1	1	G3M3A2		0	1891074076	0	1.22e-05	19.03	0.226297	3	1872.96	0.982965	624.992	35.3863	2
	High	PLPDNVSVVEPK	1	1	1	G3M3A2		0	58251303	0	2.304e-05	18.61	0.145984	2	1293.71	0.127095	647.356	64.0309	0
	High	AcYGVLR	2	1	1	G3M3A2	C2(Carbamidomethyl)	0	6.53317e+08	0.001	0.03514	38.6	0.000773015	2	838.425	0.707095	419.716	24.4632	0
A0A126GUT1	Translationally-controlled tumor protein homolog OS=Drosophila melanogaster OX=7227 GN=Tctp PE=3 SV=1 - [A0A126GUT1_DROME]	1081.96	2.28809e+09	23	56.4	1	8	8	172	19.6246	4.80518
	A2	Sequence	# PSMs	# Proteins	# Protein Groups	Protein Group Accessions	Modifications	ΔCn	Area	q-Value	PEP	IonScore	Exp Value	Charge	MH+ [Da]	ΔM [ppm]	m/z [Da]	RT [min]	# Missed Cleavages
	High	LEGANASAEEADEGTDITSESGVDVVLNHR	8	1	1	A0A126GUT1		0	2.33042e+07	0	2.444e-15	142.99	3.24011e-14	3	3085.42	-0.232387	1029.14	85.7674	0
	High	DIITGDEMFADTYK	2	1	1	A0A126GUT1		0	610930733	0	1.887e-07	88.86	5.46071e-09	2	1618.73	-0.574181	809.868	97.5867	0
	High	SPDQVDIFK	3	1	1	A0A126GUT1		0	2069808961	0	5.402e-05	77.91	1.55336e-07	2	1048.53	0.282585	524.769	34.5343	0
	High	LTEcFAFGDKK	3	1	1	A0A126GUT1	C4(Carbamidomethyl)	0	893371144	0	5.141e-06	76.15	2.7906e-07	2	1315.64	0.567449	658.322	28.9927	1
	High	EINGDSVPVLMFFK	2	1	1	A0A126GUT1		0	3.7588e+08	0	1.323e-06	76.05	3.51363e-07	2	1595.81	-0.147303	798.41	58.985	0
	High	LVDDVIYEVYGK	1	1	1	A0A126GUT1		0	2883694016	0	2.612e-07	75.28	4.03217e-07	2	1412.73	1.42588	706.87	47.0553	0
	High	DIITGDEmFADTYK	1	1	1	A0A126GUT1	M8(Oxidation)	0	1.13809e+07	0	1.2e-06	46.04	7.8399e-05	2	1634.73	2.91541	817.869	84.3664	0
	High	SYTLYLK	2	1	1	A0A126GUT1		0	1910759072	0	0.007687	39.65	0.00233044	2	887.488	0.263769	444.247	56.4371	0
	High	LTEcFAFGDK	1	1	1	A0A126GUT1	C4(Carbamidomethyl)	0	0	0	9.818e-05	16.16	0.105315	2	1187.54	0.628065	594.274	65.7766	0
R9Q794	60S ribosomal protein L5 OS=Drosophila melanogaster OX=7227 GN=RpL5 PE=1 SV=1 - [R9Q794_DROME]	1332.19	2.23801e+09	54	50.5	1	16	16	299	34.0158	9.77393
	A2	Sequence	# PSMs	# Proteins	# Protein Groups	Protein Group Accessions	Modifications	ΔCn	Area	q-Value	PEP	IonScore	Exp Value	Charge	MH+ [Da]	ΔM [ppm]	m/z [Da]	RT [min]	# Missed Cleavages
	High	GAVDGGLNIPHSVK	4	1	1	R9Q794		0	2.50914e+09	0	1.129e-09	105.98	3.72213e-10	2	1363.73	0.571136	682.37	29.4564	0
	High	LGLDSLYAGcTEVTGEEFNVEPVDDGPGAFR	3	1	1	R9Q794	C10(Carbamidomethyl)	0	47140189	0	5.376e-12	78.99	9.27443e-08	3	3314.52	0.521347	1105.51	126.948	0
	High	ADDLEDIYKK	3	1	1	R9Q794		0	106498794	0	1.722e-06	64.34	4.54639e-06	2	1209.6	1.28526	605.304	48.0823	1
	High	RFPGYSAETK	5	1	1	R9Q794		0	2024637440	0	8.859e-06	60.14	7.89146e-06	2	1155.58	0.99572	578.294	20.1551	1
	High	SLEEEDEESFK	5	1	1	R9Q794		0	1223585820	0	2.59e-06	59.09	4.6858e-06	2	1341.57	0.144835	671.288	27.9224	0
	High	VVcAAYSHELPK	3	1	1	R9Q794	C3(Carbamidomethyl)	0	1.21767e+08	0	5.562e-07	47.77	0.000255677	2	1373.69	-1.66313	687.347	39.8969	0
	High	AHIFGQHVADYMR	5	1	1	R9Q794		0	1.15917e+09	0	9.597e-06	47.72	0.000155521	3	1544.74	0.565894	515.586	50.9097	0
	High	IEGDRVVcAAYSHELPK	5	1	1	R9Q794	C8(Carbamidomethyl)	0	1884085662	0	6.81e-12	46.45	0.000488031	3	1943.97	0.939528	648.66	30.3914	1
	High	cFLDVGLAR	2	1	1	R9Q794	C1(Carbamidomethyl)	0	834539624	0	0.0002502	46.12	0.000315203	2	1050.54	0.302294	525.774	41.9589	0
	High	SFNADVHR	1	1	1	R9Q794		0	768998438	0	0.002896	39.58	0.000771078	3	945.454	0.352613	315.823	17.1415	0
	High	LGIRADDLEDIYKK	5	1	1	R9Q794		0	351286831	0	1.996e-07	36.73	0.00355643	3	1648.89	0.55268	550.302	35.9141	2
	High	ADDLEDIYK	1	1	1	R9Q794		0	19926882	0	6.478e-05	34.94	0.00251692	2	1081.51	0.533879	541.256	62.6277	0
	High	RLTFQDK	3	1	1	R9Q794		0	2180255720	0	0.00255	32.66	0.00582651	2	907.499	-1.15542	454.253	20.2595	1
	High	DITVQIAYAR	4	1	1	R9Q794		0	7.26247e+06	0	0.001046	28.3	0.023222	2	1149.63	-0.0200049	575.317	82.5774	0
	High	TDYYARK	3	1	1	R9Q794		0	2.60865e+07	0	0.007159	26.37	0.0274503	2	916.452	-0.403081	458.73	8.90026	1
	High	LGIRADDLEDIYK	1	1	1	R9Q794		0	7.65155e+07	0	3.801e-07	23.92	0.0997551	3	1520.8	0.3379	507.604	79.5647	1
	High	AHIFGQHVADYmR	1	1	1	R9Q794	M12(Oxidation)	0	9.79358e+06	0	0.004647	2.79	6.1807	3	1560.74	0.728747	520.918	39.3994	0
A0A0B4JD11	Eukaryotic translation elongation factor 1 gamma, isoform C OS=Drosophila melanogaster OX=7227 GN=eEF1gamma PE=4 SV=1 - [A0A0B4JD11_DROME]	2744.3	2.21343e+09	80	63.81	1	31	31	431	48.9368	7.04932
	A2	Sequence	# PSMs	# Proteins	# Protein Groups	Protein Group Accessions	Modifications	ΔCn	Area	q-Value	PEP	IonScore	Exp Value	Charge	MH+ [Da]	ΔM [ppm]	m/z [Da]	RT [min]	# Missed Cleavages
	High	KAAEPAEELDAADEALAAEPK	3	1	1	A0A0B4JD11		0	725002918	0	7.422e-16	123.62	6.82181e-12	2	2139.05	1.20514	1070.03	73.4723	1
	High	VFMScNLITGMFQR	4	1	1	A0A0B4JD11	C5(Carbamidomethyl)	0	351986461	0	1.135e-09	110.98	8.09965e-11	2	1703.81	1.2796	852.408	54.084	0
	High	GQDLAFTLSPDWQIDYEVYDWK	3	1	1	A0A0B4JD11		0	3.17399e+07	0	1.389e-12	108.77	1.85835e-10	3	2689.25	0.768091	897.087	65.8796	0
	High	VPAFETAEGQYLSESNAIAYLLANEQLR	1	1	1	A0A0B4JD11		0	145929769	0	5.161e-13	103.95	7.14823e-10	4	3097.55	1.16899	775.143	64.8879	0
	High	GQDLAFTLSPDWQIDYEVYDWKK	3	1	1	A0A0B4JD11		0	184999086	0	6.446e-11	100.26	1.2951e-09	3	2817.34	0.841738	939.786	122.235	1
	High	AAEPAEELDAADEALAAEPK	4	1	1	A0A0B4JD11		0	2282121396	0	1.404e-12	92.62	6.20863e-09	3	2010.95	-0.121289	670.988	43.7864	0
	High	LVTQYFSWSGTDK	3	1	1	A0A0B4JD11		0	615822246	0	4.392e-08	87.84	1.71837e-08	2	1531.74	0.67943	766.376	43.8806	0
	High	VPAFETAEGQYLSESNAIAYLLANEQLRGGK	2	1	1	A0A0B4JD11		0	6.25898e+06	0	2.048e-15	86.49	3.02924e-08	3	3339.7	3.34498	1113.9	124.16	1
	High	KLVTQYFSWSGTDK	4	1	1	A0A0B4JD11		0	730009496	0	5.264e-11	82.99	7.13326e-08	2	1659.84	-0.696364	830.422	37.9898	1
	High	ALIAAQYSGAQVK	3	1	1	A0A0B4JD11		0	1794069095	0	1.942e-07	75.75	3.37912e-07	2	1319.73	0.668555	660.37	30.9624	0
	High	QEAEAVLQQLNQK	3	1	1	A0A0B4JD11		0	671373964	0	2.421e-08	75.53	3.66667e-07	2	1498.79	0.649594	749.897	35.5288	0
	High	LQDATFLAGER	2	1	1	A0A0B4JD11		0	564339208	0	4.642e-06	74.36	6.35769e-07	2	1220.63	1.36684	610.818	33.8974	0
	High	FDAENYSIWFGEYK	4	1	1	A0A0B4JD11		0	619221080	0	2.424e-09	73.09	2.18454e-07	2	1768.79	0.727839	884.897	54.6046	0
	High	RVYSNEDEAK	3	1	1	A0A0B4JD11		0	7.62437e+07	0	1.337e-07	69.41	1.07105e-06	2	1210.57	-0.226028	605.788	7.24189	1
	High	KFPGGKVPAFETAEGQYLSESNAIAYLLANEQLR	1	1	1	A0A0B4JD11		0	307145323	0	1.828e-11	67.85	1.657e-06	4	3711.9	-1.01547	928.73	118.563	2
	High	SIPYFFDKFDAENYSIWFGEYK	2	1	1	A0A0B4JD11		0	165391894	0	1.746e-09	60.3	7.46603e-06	3	2766.28	0.709303	922.764	61.2894	1
	High	GTLYTYPENFR	3	1	1	A0A0B4JD11		0	2564101856	0	1.406e-05	59.16	9.40376e-06	2	1360.65	0.466608	680.831	36.8153	0
	High	SAFGNVNR	2	1	1	A0A0B4JD11		0	191353960	0	0.005003	57.39	1.59591e-05	2	864.433	0.373021	432.72	19.1529	0
	High	GTFNFDDFK	3	1	1	A0A0B4JD11		0	1577489564	0	0.003403	48.15	8.19132e-05	2	1090.48	0.564372	545.746	41.1589	0
	High	DPFDALPK	2	1	1	A0A0B4JD11		0	308446337	0	0.0006534	46.88	0.000275881	2	902.462	-0.0240554	451.735	39.0657	0
	High	ALVFDPKK	3	1	1	A0A0B4JD11		0	359032960	0	0.002151	43.05	0.000569768	2	917.546	0.784606	459.277	23.2299	1
	High	SKDPFDALPK	4	1	1	A0A0B4JD11		0	837393531	0	0.0003461	41.42	0.00114656	2	1117.59	0.593991	559.298	30.7567	1
	High	KYAEFQAK	1	1	1	A0A0B4JD11		0	293086252	0	0.0003515	41.39	0.000540949	2	984.516	0.742801	492.761	16.324	1
	High	WFVTILNQK	2	1	1	A0A0B4JD11		0	349101032	0	8.178e-05	40.1	0.000996782	2	1148.65	-0.0117241	574.827	46.1663	0
	High	YNEELSK	1	1	1	A0A0B4JD11		0	3.96099e+07	0	0.004271	35.97	0.00104966	2	882.42	-0.167364	441.714	22.2555	0
	High	YAEFQAK	6	1	1	A0A0B4JD11		0	139830272	0	0.002206	27.71	0.00762452	2	856.421	1.63702	428.714	20.3806	0
	High	GTFNFDDFKR	1	1	1	A0A0B4JD11		0	8.87832e+07	0	8.152e-05	27.07	0.0114857	3	1246.58	-0.337202	416.2	62.4641	1
	High	VFMScNLITGMFQRLDK	1	1	1	A0A0B4JD11	C5(Carbamidomethyl)	0	2.24656e+07	0	1.562e-05	14.93	0.499724	3	2060.02	2.38686	687.344	53.7447	1
	High	ITLADIVVFSSLLHLYEYVLEPSVR	1	1	1	A0A0B4JD11		0	0	0	5.815e-05	10.9	0.69497	3	2876.57	-3.07855	959.529	70.7215	0
	High	SIPYFFDK	3	1	1	A0A0B4JD11		0	929158578	0.001	0.01149	29.8	0.013508	2	1016.51	1.54572	508.759	42.2941	0
	High	ALVFDPK	2	1	1	A0A0B4JD11		0	845345188	0.002	0.08831	39.6	0.00147476	2	789.451	1.14296	395.229	30.4395	0
X2JGG6	Heat shock protein 26, isoform B OS=Drosophila melanogaster OX=7227 GN=Hsp26 PE=3 SV=1 - [X2JGG6_DROME]	1503.97	2207055367	43	81.25	1	19	19	208	22.9798	7.56201
	A2	Sequence	# PSMs	# Proteins	# Protein Groups	Protein Group Accessions	Modifications	ΔCn	Area	q-Value	PEP	IonScore	Exp Value	Charge	MH+ [Da]	ΔM [ppm]	m/z [Da]	RT [min]	# Missed Cleavages
	High	SINGcPcASPIcPSSPAGQVLALR	1	1	1	X2JGG6	C5(Carbamidomethyl); C7(Carbamidomethyl); C12(Carbamidomethyl)	0	8.92217e+06	0	6.016e-11	108.54	1.80547e-10	2	2512.21	1.69494	1256.61	91.3307	0
	High	ERIIQIQQVGPAHLNVK	6	1	1	X2JGG6		0	2424352313	0	2.711e-12	94.08	1.58291e-09	2	1943.12	0.558486	972.063	32.2816	1
	High	SPIYELGLGLHPHSR	6	1	1	X2JGG6		0	3274717594	0	2.741e-11	87.94	2.35417e-08	2	1675.89	-0.287901	838.449	62.2036	0
	High	sLSTLLSLVDELQEPR	2	1	1	X2JGG6	N-Term(Acetyl)	0	2.81625e+07	0	9.497e-09	86.11	3.75931e-08	2	1841.99	3.15653	921.499	129.789	0
	High	AEQVVSQLSSDGVLTVSIPKPQAVEDK	3	1	1	X2JGG6		0	70047892	0	3.03e-13	77.96	2.15141e-07	3	2824.5	0.565512	942.17	46.2777	1
	High	HEERQDDHGHIMR	4	1	1	X2JGG6		0	1.85771e+08	0	3.42e-07	71.47	2.56627e-07	2	1659.74	-0.517959	830.373	6.53676	1
	High	VPDGYKAEQVVSQLSSDGVLTVSIPKPQAVEDK	1	1	1	X2JGG6		0	133102323	0	2.35e-12	67.44	2.2087e-06	4	3483.82	-0.549484	871.71	103.336	2
	High	VPDGYKAEQVVSQLSSDGVLTVSIPK	1	1	1	X2JGG6		0	7.92429e+07	0	4.366e-09	65.68	2.92028e-06	3	2716.44	-0.474591	906.151	107.958	1
	High	IIQIQQVGPAHLNVK	4	1	1	X2JGG6		0	8.80287e+08	0	4.198e-06	65.67	1.34154e-06	2	1657.97	-0.571027	829.491	65.6419	0
	High	VVDDSILVEGK	1	1	1	X2JGG6		0	914693910	0	1.482e-05	65.16	5.25762e-06	2	1173.64	1.92907	587.323	33.8122	0
	High	AEQVVSQLSSDGVLTVSIPK	1	1	1	X2JGG6		0	0	0	3.376e-07	64.45	4.16349e-06	2	2057.1	-4.14165	1029.06	129.183	0
	High	VVDDSILVEGKHEER	1	1	1	X2JGG6		0	138858261	0	1.796e-06	53.31	6.04324e-05	4	1724.88	0.240795	431.976	42.4095	1
	High	DGFQVcMDVAQFKPSELNVK	2	1	1	X2JGG6	C6(Carbamidomethyl)	0	222194468	0	6.997e-11	51.09	9.84216e-05	3	2312.11	4.14031	771.376	49.6154	1
	High	sLSTLLSLVDELQEPRSPIYELGLGLHPHSR	1	1	1	X2JGG6	N-Term(Acetyl)	0	398946224	0	5.647e-13	49.53	9.58293e-05	4	3498.87	1.96157	875.472	69.4436	1
	High	RSINGcPcASPIcPSSPAGQVLALRR	1	1	1	X2JGG6	C6(Carbamidomethyl); C8(Carbamidomethyl); C13(Carbamidomethyl)	0	1.43296e+08	0	6.773e-10	42.38	0.000916282	4	2824.41	-0.565679	706.858	68.2324	2
	High	SINGcPcASPIcPSSPAGQVLALRR	2	1	1	X2JGG6	C5(Carbamidomethyl); C7(Carbamidomethyl); C12(Carbamidomethyl)	0	922096194	0	7.512e-06	31.73	0.0104407	3	2668.3	-4.1907	890.105	78.7161	1
	High	VVDDSILVEGKHEERQDDHGHIMR	2	1	1	X2JGG6		0	174623532	0	3.03e-10	27.76	0.0267153	4	2814.36	2.04076	704.347	24.8557	2
	High	NDIHWPATAHVGK	1	1	1	X2JGG6		0	62648240	0	1.469e-06	25.63	0.0504657	3	1445.73	0.976151	482.581	42.4581	0
	High	EMANRNDIHWPATAHVGK	3	1	1	X2JGG6		0	669816478	0	1.486e-06	19.69	0.161098	4	2046.99	0.39066	512.504	26.3062	1
CON_00713000.3	(Bos taurus) Gene_Symbol=TUBB1 tubulin, beta 1 - [ENSEMBL:ENSBTAP00000025008|REFSEQ:NP_001137572]	414.463	2192163077	17	10.67	2	1	5	450	49.9555	5.10986
	A2	Sequence	# PSMs	# Proteins	# Protein Groups	Protein Group Accessions	Modifications	ΔCn	Area	q-Value	PEP	IonScore	Exp Value	Charge	MH+ [Da]	ΔM [ppm]	m/z [Da]	RT [min]	# Missed Cleavages
	High	FPGQLNADLRK	9	7	5	CON_00697107.2;CON_00713000.3;Q8MST5;A1ZBL0;A0A0B4LGH1		0	1833838866	0	3.391e-07	53.62	8.36432e-05	2	1258.69	0.228854	629.849	28.0246	1
	High	LAVNMVPFPR	3	7	5	CON_00697107.2;CON_00713000.3;Q8MST5;A1ZBL0;A0A0B4LGH1		0	4319253188	0	4.12e-05	52.12	8.40854e-05	2	1143.63	0.0574596	572.321	43.4357	0
	High	IREEYPDR	3	7	5	CON_00697107.2;CON_00713000.3;Q8MST5;A1ZBL0;A0A0B4LGH1		0	423397177	0	0.001808	39.14	0.00148717	2	1077.53	0.00457672	539.27	16.8485	1
	High	FPGQLNADLR	1	7	5	CON_00697107.2;CON_00713000.3;Q8MST5;A1ZBL0;A0A0B4LGH1		0	1.60546e+07	0	1.487e-05	28.47	0.023824	2	1130.6	1.5498	565.802	64.6471	0
	High	mREIVHIQIGQcGNQIGAK	1	2	1	CON_00713000.3	M1(Oxidation); C12(Carbamidomethyl)	0	16037141	0	0.0003484	8.84	2.12906	3	2168.1	-3.54333	723.371	50.4606	1
M9PFF0	60S ribosomal protein L13 OS=Drosophila melanogaster OX=7227 GN=RpL13 PE=1 SV=1 - [M9PFF0_DROME]	618.22	2189391988	39	53.67	1	17	17	218	24.9358	10.9897
	A2	Sequence	# PSMs	# Proteins	# Protein Groups	Protein Group Accessions	Modifications	ΔCn	Area	q-Value	PEP	IonScore	Exp Value	Charge	MH+ [Da]	ΔM [ppm]	m/z [Da]	RT [min]	# Missed Cleavages
	High	IRAGESSLEEcK	4	1	1	M9PFF0	C11(Carbamidomethyl)	0	1152101830	0	1.814e-07	66.69	2.36789e-06	2	1378.66	-0.295921	689.835	18.5894	1
	High	NEQPAVVEFR	2	1	1	M9PFF0		0	1.13983e+09	0	3.431e-05	63.15	5.76165e-06	2	1188.6	1.48524	594.805	30.9174	0
	High	NEQPAVVEFREVTKDEK	2	1	1	M9PFF0		0	341939826	0	5.236e-09	61.79	1.02312e-05	2	2018.02	1.55153	1009.51	52.9275	2
	High	NEQPAVVEFREVTK	2	1	1	M9PFF0		0	160327638	0	1.059e-08	60.82	1.03907e-05	2	1645.85	0.177796	823.431	31.2383	1
	High	TIGIAVDR	1	1	1	M9PFF0		0	520178764	0	0.001074	57.63	3.22732e-05	2	844.489	0.523442	422.748	27.5461	0
	High	AGESSLEEcK	1	1	1	M9PFF0	C9(Carbamidomethyl)	0	6.85143e+06	0	4.208e-05	48.87	5.059e-05	2	1109.48	-0.799404	555.242	23.1547	0
	High	GPVLPIK	1	1	1	M9PFF0		0	1257157180	0	0.003033	48.51	1.40595e-05	2	723.477	0.906794	362.242	28.276	0
	High	LILFPINEK	2	1	1	M9PFF0		0	2605002330	0	0.00208	40.21	0.00104331	2	1086.66	0.784525	543.832	45.2616	0
	High	GPVLPIKNEQPAVVEFR	1	1	1	M9PFF0		0	71265795	0	4.635e-08	39.35	0.00090593	3	1893.06	-0.70983	631.691	76.0839	1
	High	GNNMIPNQHYHK	4	1	1	M9PFF0		0	337997042	0	0.0005918	32.58	0.0043062	2	1452.68	-0.188707	726.844	17.0567	0
	High	TWFNQPARK	6	1	1	M9PFF0		0	1457661328	0	0.0009045	26.44	0.0343885	2	1147.6	-1.27269	574.303	34.0405	1
	High	GAGIGANFAK	1	1	1	M9PFF0		0	1.11873e+09	0	0.000409	25.74	0.0510703	2	905.483	-0.613224	453.245	38.6467	0
	High	TIGIAVDRR	3	1	1	M9PFF0		0	793030144	0	0.001921	25.66	0.0361286	3	1000.59	0.108091	334.202	22.1694	1
	High	GNNmIPNQHYHK	2	1	1	M9PFF0	M4(Oxidation)	0	7.70354e+07	0	1.991e-05	22.59	0.0220323	3	1468.67	-1.32566	490.229	13.6228	0
	High	LILFPINEKK	1	1	1	M9PFF0		0	29517896	0	0.0002701	19.8	0.049215	3	1214.75	-0.916533	405.588	67.4929	1
	High	AVFPRPASGALRPVVR	2	1	1	M9PFF0		0	2147507880	0	0.000476	8.61	0.509568	3	1693	-0.115214	565.005	29.3673	2
	High	GFTLEELK	2	1	1	M9PFF0		0	1815665754	0.001	0.01463	27.23	0.0187342	2	936.505	1.22592	468.756	37.2822	0
	High	AFATLRK	2	1	1	M9PFF0		0	1155164077	0.002	0.05672	24.27	0.00972688	2	806.489	0.514322	403.748	20.2721	1
Q9V9M7	60S ribosomal protein L21 OS=Drosophila melanogaster OX=7227 GN=RpL21 PE=1 SV=1 - [Q9V9M7_DROME]	547.426	2.17087e+09	29	55.97	1	10	10	159	18.4642	10.5503
	A2	Sequence	# PSMs	# Proteins	# Protein Groups	Protein Group Accessions	Modifications	ΔCn	Area	q-Value	PEP	IonScore	Exp Value	Charge	MH+ [Da]	ΔM [ppm]	m/z [Da]	RT [min]	# Missed Cleavages
	High	IFNVTQHAVGVIVNK	5	1	1	Q9V9M7		0	2445246360	0	1.232e-12	125.52	2.55294e-12	2	1638.93	-0.078456	819.97	36.0872	0
	High	HGVIPLSTYMR	3	1	1	Q9V9M7		0	2.01024e+08	0	3.216e-08	72.47	9.65438e-07	2	1273.67	-0.0271346	637.34	33.2723	0
	High	IGDIVDIK	1	1	1	Q9V9M7		0	804662744	0	0.0001877	60.97	8.27828e-06	2	872.51	1.14832	436.759	33.7372	0
	High	KLEEPIALAPIPYEFIA	5	1	1	Q9V9M7		0	2782158079	0	5.15e-05	48.93	0.000133695	3	1914.06	0.212633	638.692	61.0253	1
	High	cREDFLR	1	1	1	Q9V9M7	C1(Carbamidomethyl)	0	1.98988e+08	0	0.002899	28.48	0.0119201	3	995.472	-0.422504	332.496	20.7597	1
	High	IFNVTQHAVGVIVNKR	1	1	1	Q9V9M7		0	257793320	0	5.28e-05	27.9	0.0136232	4	1795.03	-3.58036	449.512	32.2893	1
	High	RVNVRIEHIHHSK	9	1	1	Q9V9M7		0	9.02128e+08	0	1.28e-05	22.03	0.0620348	4	1624.91	0.0788453	406.984	7.66019	2
	High	cREDFLRR	2	1	1	Q9V9M7	C1(Carbamidomethyl)	0	182730368	0	0.007872	20.92	0.096687	3	1151.57	0.469538	384.53	17.9341	2
	High	GQWVSLK	1	1	1	Q9V9M7		0	1.28521e+09	0.002	0.0871	32.69	0.0063785	2	817.458	1.05917	409.232	29.0425	0
	High	DMFSRPFRK	1	1	1	Q9V9M7		0	658850392	0.009	0.3638	6.89	1.92366	3	1183.6	0.557363	395.206	24.3568	2
X2JGM9	40S ribosomal protein S4 OS=Drosophila melanogaster OX=7227 GN=RpS4 PE=3 SV=1 - [X2JGM9_DROME]	1482.68	2.15262e+09	59	64.75	1	20	20	261	29.1159	10.1841
	A2	Sequence	# PSMs	# Proteins	# Protein Groups	Protein Group Accessions	Modifications	ΔCn	Area	q-Value	PEP	IonScore	Exp Value	Charge	MH+ [Da]	ΔM [ppm]	m/z [Da]	RT [min]	# Missed Cleavages
	High	FDSGNLcMITGGR	2	1	1	X2JGM9	C7(Carbamidomethyl)	0	1101280336	0	4.449e-08	82.78	2.24073e-08	2	1427.64	-0.087397	714.324	76.5282	0
	High	VRTDPTYPAGYMDVITLEK	2	1	1	X2JGM9		0	1162206250	0	1.847e-07	74.99	5.38826e-07	2	2169.09	-1.60992	1085.05	88.9718	1
	High	TIRYPDPLIHANDSVQVDIASGK	9	1	1	X2JGM9		0	609096320	0	4.717e-15	73.88	5.95474e-07	3	2509.31	0.279242	837.107	39.6331	1
	High	LRESLPLLIFLR	6	1	1	X2JGM9		0	2.19984e+09	0	1.403e-08	72.31	5.86098e-08	2	1469.92	0.923286	735.464	53.5444	1
	High	YALNGAEVTK	2	1	1	X2JGM9		0	1.22594e+09	0	0.0001118	71.26	1.00629e-06	2	1065.56	0.803248	533.283	25.986	0
	High	DSQGHVFATR	3	1	1	X2JGM9		0	758286147	0	2.35e-06	67.69	2.31494e-06	2	1117.54	0.836668	559.273	18.2121	0
	High	FDSGNLcmITGGR	1	1	1	X2JGM9	C7(Carbamidomethyl); M8(Oxidation)	0	2.11113e+07	0	1.146e-05	58.9	4.50887e-06	2	1443.64	0.983758	722.322	66.1877	0
	High	LTNVFIIGK	3	1	1	X2JGM9		0	2595924460	0	0.0001437	55.99	8.18245e-06	2	1004.61	0.11942	502.811	40.0046	0
	High	ESLPLLIFLR	3	1	1	X2JGM9		0	1.14269e+08	0	3.194e-06	54.6	2.3058e-05	2	1200.74	2.05301	600.872	61.6505	0
	High	ERHPGSFDIVHIK	4	1	1	X2JGM9		0	1662106112	0	7.227e-07	52.95	9.02443e-05	4	1534.81	0.854944	384.459	25.051	1
	High	HPGSFDIVHIK	4	1	1	X2JGM9		0	1225434974	0	7.26e-07	52.25	7.95209e-05	3	1249.67	0.777917	417.228	47.4844	0
	High	GVPFLVTHDGR	3	1	1	X2JGM9		0	9.96984e+08	0	4.454e-05	50.73	7.22713e-05	2	1197.64	0.67797	599.323	31.1739	0
	High	LSIAEERDK	3	1	1	X2JGM9		0	1294116320	0	0.0003297	48.58	0.000253083	2	1060.56	0.144132	530.785	18.2007	1
	High	GNKPYISLPK	3	1	1	X2JGM9		0	1603595696	0	6.019e-05	43.63	0.000580905	2	1116.64	1.15736	558.825	25.1744	1
	High	TDPTYPAGYMDVITLEK	1	1	1	X2JGM9		0	52826251	0	3.59e-07	29.3	0.0135701	2	1913.92	1.35627	957.465	50.8319	0
	High	LGGVFAPRPSTGPHK	4	1	1	X2JGM9		0	8.86384e+08	0	0.0001595	24.89	0.0345422	3	1520.83	0.511734	507.616	35.0876	1
	High	LSIAEERDKR	2	1	1	X2JGM9		0	64718835	0	0.001796	19.96	0.210934	3	1216.66	0.0769592	406.226	16.0714	2
	High	VGTVVNR	1	1	1	X2JGM9		0	9.55404e+07	0.001	0.01015	49.82	7.13987e-05	2	744.437	0.362336	372.722	15.0519	0
	High	PYISLPK	1	1	1	X2JGM9		0	302402929	0.001	0.0105	35.11	0.00399273	2	817.482	0.6191	409.245	56.882	0
	High	LSIAEER	1	1	1	X2JGM9		0	71503270	0.002	0.08396	42.51	0.000917313	2	817.441	-0.892876	409.224	22.4267	0
	High	GRFVIHR	1	1	1	X2JGM9		0	82283887	0.002	0.08012	26.88	0.0122044	2	884.522	0.388661	442.764	17.1214	1
C9QP42	RNA helicase OS=Drosophila melanogaster OX=7227 GN=eIF4A PE=1 SV=1 - [C9QP42_DROME]	2251.29	2.14323e+09	77	68.49	1	30	30	403	45.8494	5.65576
	A2	Sequence	# PSMs	# Proteins	# Protein Groups	Protein Group Accessions	Modifications	ΔCn	Area	q-Value	PEP	IonScore	Exp Value	Charge	MH+ [Da]	ΔM [ppm]	m/z [Da]	RT [min]	# Missed Cleavages
	High	ILESGcHVVVGTPGR	4	1	1	C9QP42	C6(Carbamidomethyl)	0	2257658264	0	8.026e-13	125.6	3.92478e-12	2	1580.82	1.03133	790.915	27.3833	0
	High	GIDVQQVSLVINYDLPSNR	1	1	1	C9QP42		0	0	0	1.362e-09	114.99	4.84944e-11	2	2130.12	0.871269	1065.56	113.241	0
	High	GRDVIAQAQSGTGK	4	1	1	C9QP42		0	1.42721e+09	0	3.585e-11	104.08	7.97315e-10	2	1387.73	1.78676	694.369	25.7181	1
	High	VLITTDLLAR	7	1	1	C9QP42		0	2548321625	0	4.188e-05	85.13	2.39384e-08	2	1114.68	0.493457	557.845	43.8284	0
	High	LFVLDEADEMLSR	2	1	1	C9QP42		0	9.65924e+08	0	2.603e-08	83.64	3.91425e-08	2	1537.76	1.11146	769.383	55.5821	0
	High	GIYGYGFEKPSAIQQR	2	1	1	C9QP42		0	185665212	0	1.14e-09	82.37	8.83629e-08	2	1813.92	0.428074	907.466	62.8261	1
	High	LGTLcDLYDTLSITQSVIFcNTR	1	1	1	C9QP42	C5(Carbamidomethyl); C20(Carbamidomethyl)	0	8.13165e+07	0	1.151e-09	70.86	1.27154e-06	3	2690.32	0.178573	897.444	70.297	0
	High	KEELTLEGIK	4	1	1	C9QP42		0	6.71938e+08	0	5.573e-07	68.35	1.97394e-06	2	1159.66	0.0765059	580.332	28.4432	1
	High	VHSHAcIGGTNVR	6	1	1	C9QP42	C6(Carbamidomethyl)	0	4.57334e+08	0	7.283e-09	67.24	2.33167e-06	3	1407.69	-0.152909	469.902	13.4966	0
	High	GVAINFITDDDRR	5	1	1	C9QP42		0	1623719512	0	1.722e-07	60.96	1.63542e-05	2	1491.76	0.206061	746.381	35.3797	1
	High	ELATQIQR	2	1	1	C9QP42		0	774017832	0	0.002186	55.62	3.3036e-05	2	958.532	0.70305	479.77	33.2718	0
	High	EcQALILAPTR	2	1	1	C9QP42	C2(Carbamidomethyl)	0	1.58778e+08	0	1.615e-05	54.67	4.19667e-05	2	1271.68	0.452123	636.343	35.2325	0
	High	DVIAQAQSGTGK	2	1	1	C9QP42		0	55798194	0	1.397e-05	52.27	8.47883e-05	2	1174.61	-1.08397	587.806	36.8976	0
	High	EELTLEGIK	2	1	1	C9QP42		0	284000868	0	9.155e-05	49.69	0.000149285	2	1031.56	-0.388017	516.284	36.1755	0
	High	DQIQDVFK	2	1	1	C9QP42		0	1125212248	0	0.00229	46.13	0.000241343	2	992.506	1.13417	496.757	36.5369	0
	High	VVMALGEYMK	1	1	1	C9QP42		0	167542434	0	0.0001902	45.07	0.000393632	2	1140.58	0.24906	570.793	75.243	0
	High	GIDVQQVSLVINYDLPSNRENYIHR	7	1	1	C9QP42		0	1204210156	0	5.9e-11	44.9	0.000491862	4	2942.51	-0.127073	736.383	46.688	1
	High	cFMRDPVSILVK	2	1	1	C9QP42	C1(Carbamidomethyl)	0	218443941	0	2.232e-07	37.29	0.00295821	3	1464.77	-0.26983	488.928	79.6306	1
	High	PSAIQQR	1	1	1	C9QP42		0	2.20747e+07	0	0.003256	37.12	0.000630788	2	799.442	0.32282	400.225	8.19352	0
	High	GIYGYGFEK	2	1	1	C9QP42		0	1368244344	0	0.005673	36.33	0.00247942	2	1033.5	0.824536	517.254	59.6987	0
	High	VHSHAcIGGTNVREDAR	5	1	1	C9QP42	C6(Carbamidomethyl)	0	1175273979	0	0.004945	35.23	0.00434879	2	1878.89	-2.07049	939.951	20.25	1
	High	LGTLcDLYDTLSITQSVIFcNTRR	1	1	1	C9QP42	C5(Carbamidomethyl); C20(Carbamidomethyl)	0	149435098	0	5.986e-11	35.07	0.00448087	3	2846.41	-2.29179	949.475	64.6853	1
	High	DIEQFYHTTIEEMPANIADLI	1	1	1	C9QP42		0	5.59066e+07	0	0.0007649	30.66	0.01048	3	2463.18	0.709894	821.73	70.2993	0
	High	GFKDQIQDVFK	1	1	1	C9QP42		0	53862148	0	0.0002615	29.87	0.00932499	3	1324.69	-0.738285	442.234	71.873	1
	High	MLPPDVQVILLSATMPPDVLEVSR	1	1	1	C9QP42		0	53286187	0	2.751e-09	29.46	0.00985188	3	2620.41	0.822644	874.142	70.0216	0
	High	VYDMINRK	3	1	1	C9QP42		0	368117098	0	0.006685	29.39	0.0179525	2	1038.54	0.436808	519.774	29.7696	1
	High	QFYVNVK	2	1	1	C9QP42		0	449928547	0	0.008949	25.53	0.0362468	2	897.483	0.266925	449.245	28.4356	0
	High	cFMRDPVSILVKK	1	1	1	C9QP42	C1(Carbamidomethyl)	0	5728204	0	0.001589	16.87	0.262126	4	1592.87	2.56022	398.973	66.8382	2
	High	EcQALILAPTRELATQIQR	1	1	1	C9QP42	C2(Carbamidomethyl)	0	12639301	0	9.606e-05	11.71	0.890377	3	2211.19	0.739007	737.736	85.9499	1
	High	AIIPcVR	1	1	1	C9QP42	C5(Carbamidomethyl)	0	1609734192	0.001	0.01967	47.29	0.000243563	2	828.477	0.952277	414.742	30.0232	0
	High	DIEQFYHTTIEEmPANIADLI	1	1	1	C9QP42	M13(Oxidation)	0	1.45664e+07	0.001	0.01693	16.21	0.338654	3	2479.17	1.84549	827.063	64.2421	0
Q9VAY2	HSP 82 OS=Drosophila melanogaster OX=7227 GN=Gp93 PE=1 SV=1 - [Q9VAY2_DROME]	2414.69	2.1357e+09	91	53.11	1	39	41	787	90.1825	5.021
	A2	Sequence	# PSMs	# Proteins	# Protein Groups	Protein Group Accessions	Modifications	ΔCn	Area	q-Value	PEP	IonScore	Exp Value	Charge	MH+ [Da]	ΔM [ppm]	m/z [Da]	RT [min]	# Missed Cleavages
	High	REEEAIQLDGLNVAQLK	3	1	1	Q9VAY2		0	281796190	0	3.317e-11	111.14	9.88333e-11	2	1926.03	-0.612452	963.518	82.2923	1
	High	LSNSPcALVAGVFGWTGNMER	3	1	1	Q9VAY2	C6(Carbamidomethyl)	0	4.22408e+07	0	7.674e-13	107.5	1.88498e-10	2	2266.07	-2.88456	1133.54	123.304	0
	High	EIFLRELISNASDAIDK	7	2	2	M9PBL3;Q9VAY2		0	773359479	0	2.852e-09	101.6	1.21416e-09	2	1934.02	-0.0178294	967.515	108.961	1
	High	GVVDSDDLPLNVSR	2	1	1	Q9VAY2		0	6.56307e+08	0	2.393e-07	84.89	3.92451e-08	2	1485.76	1.06864	743.382	40.8493	0
	High	ELISNASDAIDK	4	2	2	M9PBL3;Q9VAY2		0	4977445800	0	5.921e-06	84.88	5.51023e-08	2	1275.65	4.78189	638.328	32.8109	0
	High	TTWDWTLINDSK	1	1	1	Q9VAY2		0	349587081	0	2.851e-07	77.12	2.29995e-07	2	1479.71	0.400369	740.36	48.6486	0
	High	EEAQDFLEEDTVR	2	1	1	Q9VAY2		0	194092412	0	8.026e-08	76.59	1.19508e-07	2	1580.71	0.627815	790.858	39.2229	0
	High	SGTADFLAK	2	1	1	Q9VAY2		0	136729306	0	3.331e-05	71.6	7.26423e-07	2	909.467	-0.305134	455.237	43.8693	0
	High	KPAEVTEDEYTSFYK	3	1	1	Q9VAY2		0	4.06272e+08	0	3.443e-09	61.92	6.26621e-06	2	1806.85	2.84748	903.928	58.4036	1
	High	AKQEHIYYIAGANR	3	1	1	Q9VAY2		0	7.01254e+07	0	6.432e-07	61.32	1.43153e-05	2	1633.85	1.10156	817.427	32.3781	1
	High	ELETNPELHIR	4	1	1	Q9VAY2		0	633480926	0	2.03e-06	60.56	1.40644e-05	3	1350.7	0.546519	450.906	28.9527	0
	High	YSQFINFPIR	2	1	1	Q9VAY2		0	3.28257e+08	0	0.0002563	58.83	1.43355e-05	2	1284.67	-0.238137	642.84	89.9733	0
	High	FTFQTEVNR	2	1	1	Q9VAY2		0	348821016	0	0.000216	52.87	4.80267e-05	2	1141.56	0.81598	571.286	32.1811	0
	High	TDAETLKREEEAIQLDGLNVAQLK	2	1	1	Q9VAY2		0	3.01505e+07	0	2.805e-08	50.27	9.82011e-05	4	2684.41	1.38199	671.859	93.4291	2
	High	LLALSNSK	2	1	1	Q9VAY2		0	252298509	0	0.002437	49.8	0.000124085	2	845.51	1.16746	423.259	24.6775	0
	High	SEDDVEDEDAKVEEAEDEKPK	2	1	1	Q9VAY2		0	1.31287e+08	0	1.319e-09	49.46	1.92508e-05	3	2406.03	0.48532	802.682	46.7902	2
	High	WLNDVALK	2	1	1	Q9VAY2		0	487787575	0	0.001695	47.57	0.000318472	2	958.536	0.0645413	479.772	67.4612	0
	High	LIINSLYR	2	1	1	Q9VAY2		0	553616138	0	0.002262	45.81	0.000179759	2	991.594	0.586404	496.301	37.4629	0
	High	GVTSLAEYK	2	1	1	Q9VAY2		0	440535024	0	0.003406	45.62	0.000301573	2	967.509	-0.329121	484.258	27.083	0
	High	RVFITDEFNDMMPNYLSFIR	1	1	1	Q9VAY2		0	5.17097e+07	0	1.484e-09	42.46	0.00082294	3	2508.2	-0.250926	836.74	127.136	1
	High	TLEINPR	10	1	1	Q9VAY2		0	650207016	0	0.009664	40.61	0.00055179	2	842.474	1.29071	421.741	24.0369	0
	High	KFQNVAK	4	1	1	Q9VAY2		0	22651360	0	0.0003832	40.03	0.00111229	2	834.483	0.16022	417.745	1.64476	1
	High	STFEPLVK	2	1	1	Q9VAY2		0	415317007	0	0.001065	37.34	0.00192804	2	920.51	1.09931	460.759	30.9648	0
	High	VQPSESFNR	2	1	1	Q9VAY2		0	153309542	0	0.003667	35.65	0.00333531	2	1063.52	-0.316196	532.262	30.9034	0
	High	TVEEEVPVEEEAKPEK	2	1	1	Q9VAY2		0	114561284	0	1.399e-07	35.42	0.00331575	3	1841.9	0.333078	614.639	26.4223	1
	High	SDDPQRTYYLNQK	2	1	1	Q9VAY2		0	1.07134e+08	0	1.59e-06	32.1	0.00536438	2	1627.77	1.08335	814.39	37.0945	1
	High	RGSVISLYLK	2	1	1	Q9VAY2		0	222374560	0	0.00134	29.49	0.00359874	2	1135.68	0.0950779	568.345	32.2767	1
	High	PAEVTEDEYTSFYK	1	1	1	Q9VAY2		0	13231865	0	3.906e-07	29.01	0.00665696	2	1678.75	0.446604	839.878	71.7958	0
	High	EFSTNIK	1	1	1	Q9VAY2		0	1.26067e+08	0	0.009799	26.65	0.0124356	2	838.431	0.421581	419.719	33.8447	0
	High	EGSRTDAETLKREEEAIQLDGLNVAQLK	1	1	1	Q9VAY2		0	45163532	0	1.61e-07	25.47	0.044981	4	3113.61	-0.205251	779.157	86.7357	3
	High	EEAQDFLEEDTVRELIR	1	1	1	Q9VAY2		0	0	0	8.816e-06	24.24	0.0582007	3	2092.02	-1.18087	698.01	99.2674	1
	High	TVEEEVPVEEEAKPEKSEDDVEDEDAK	1	1	1	Q9VAY2		0	4.8358e+06	0	7.087e-08	23.88	0.0126871	4	3074.36	-1.73067	769.347	53.5782	2
	High	QYIWESDANSFSITEDPRGDTLK	1	1	1	Q9VAY2		0	0	0	4.73e-07	22.89	0.047035	3	2672.25	-0.129017	891.421	96.1232	1
	High	VFITDEFNDMMPNYLSFIR	1	1	1	Q9VAY2		0	9.64344e+06	0	1.305e-06	20.5	0.131905	3	2352.1	0.141122	784.706	68.0619	0
	High	ALHIMDSGIGMTHQDLINNLGTIAK	1	1	1	Q9VAY2		0	72716449	0	0.003488	12.8	0.760971	4	2663.37	2.52883	666.598	95.4086	0
	High	EEAQDFLEEDTVRELIRK	2	1	1	Q9VAY2		0	3.22215e+08	0	0.000197	9.07	1.82722	4	2220.12	0.888428	555.785	86.8503	2
	High	AKQEHIYYIAGANRAEVEK	1	1	1	Q9VAY2		0	1.86353e+08	0	7.818e-06	6.86	6.2231	4	2190.13	0.445175	548.288	36.9481	2
	High	RVEADEADDTAK	1	1	1	Q9VAY2		0	0	0.001	0.01285	40.13	0.000596864	2	1319.61	-1.45873	660.306	13.0869	1
	High	LAMSNAHQK	1	1	1	Q9VAY2		0	7.68109e+06	0.001	0.02767	33.27	0.00273167	2	999.503	-0.606033	500.255	6.91605	0
	High	SLLYVPK	1	1	1	Q9VAY2		0	311654349	0.001	0.02433	28.81	0.00493209	2	819.498	1.10842	410.253	56.4724	0
	High	DMAVMMFR	2	1	1	Q9VAY2		0	1.27655e+07	0.001	0.01749	24.39	0.012737	2	1000.44	2.15679	500.725	85.6286	0
Q95TP9	40S ribosomal protein S6 OS=Drosophila melanogaster OX=7227 GN=RpS6 PE=1 SV=1 - [Q95TP9_DROME]	360.144	2.12947e+09	15	25.81	1	7	7	217	24.681	11.063
	A2	Sequence	# PSMs	# Proteins	# Protein Groups	Protein Group Accessions	Modifications	ΔCn	Area	q-Value	PEP	IonScore	Exp Value	Charge	MH+ [Da]	ΔM [ppm]	m/z [Da]	RT [min]	# Missed Cleavages
	High	MGQVVEADILGDEWK	1	1	1	Q95TP9		0	70880214	0	1.05e-07	71.59	6.96893e-07	2	1689.82	2.67515	845.414	48.6097	0
	High	LITPVVLQRK	4	1	1	Q95TP9		0	909116668	0	5.663e-05	56.69	2.13781e-06	2	1166.76	0.522421	583.885	51.3332	1
	High	DIPGLTDTTIPR	2	1	1	Q95TP9		0	2546440269	0	8.595e-05	53.54	5.24467e-05	2	1298.7	0.0898813	649.851	43.8261	0
	High	LITPVVLQR	2	1	1	Q95TP9		0	2932851808	0	0.00145	50.9	1.50374e-05	2	1038.67	0.703698	519.838	37.1628	0
	High	QGVLTHGR	2	1	1	Q95TP9		0	3.65724e+07	0	0.0008134	44.63	0.00020661	2	867.479	-0.446956	434.243	7.47558	0
	High	DIPGLTDTTIPRR	1	1	1	Q95TP9		0	7.39886e+07	0	0.004307	10.16	1.17587	3	1454.8	0.647864	485.604	67.8959	1
	High	FVVRRPLPAK	3	1	1	Q95TP9		0	654900992	0.001	0.01001	16.38	0.0506317	3	1182.75	0.466242	394.921	19.7708	2
C6SUW3	40S ribosomal protein S9 OS=Drosophila melanogaster OX=7227 GN=RpS9 PE=1 SV=1 - [C6SUW3_DROME]	817.857	2.11146e+09	48	59.49	2	21	21	195	22.6096	10.6089
	A2	Sequence	# PSMs	# Proteins	# Protein Groups	Protein Group Accessions	Modifications	ΔCn	Area	q-Value	PEP	IonScore	Exp Value	Charge	MH+ [Da]	ΔM [ppm]	m/z [Da]	RT [min]	# Missed Cleavages
	High	IGVLDESR	2	2	1	C6SUW3		0	1051287300	0	0.000586	72.11	1.02119e-06	2	888.479	0.265695	444.743	27.2285	0
	High	RLFQGNALLR	3	2	1	C6SUW3		0	955847744	0	0.0001193	64.84	2.87083e-06	2	1187.7	0.85756	594.355	30.3365	1
	High	ELLTLDEK	2	2	1	C6SUW3		0	4.3366e+08	0	0.0005478	60.34	1.39629e-05	2	960.525	0.674588	480.766	33.3642	0
	High	ELLTLDEKDEK	4	2	1	C6SUW3		0	707426182	0	1.323e-05	55.57	5.62984e-05	2	1332.69	1.01308	666.849	28.272	1
	High	IPSVFSK	1	2	1	C6SUW3		0	2.4957e+08	0	0.007922	52.01	4.37507e-05	2	777.45	-0.632188	389.229	49.1311	0
	High	RLFQGNALLRR	2	2	1	C6SUW3		0	811841872	0	8.15e-09	51.9	4.39045e-05	3	1343.8	0.554899	448.606	25.0458	2
	High	MKLDYVLGLK	3	2	1	C6SUW3		0	1.05347e+08	0	8.283e-05	51.47	6.16618e-05	3	1179.68	0.0915078	393.898	39.7078	1
	High	LDYVLGLK	2	2	1	C6SUW3		0	349403214	0	0.001721	46.8	0.000108643	2	920.546	0.897045	460.777	40.0425	0
	High	LQTQVFK	2	2	1	C6SUW3		0	6.14208e+08	0	0.007667	46.01	0.000213019	2	863.499	0.943732	432.253	24.569	0
	High	HIDFSLK	4	1	1	C6SUW3		0	2157292788	0	0.001098	45.65	0.000579935	2	859.468	0.580244	430.238	44.7942	0
	High	IIGEYGLR	2	2	1	C6SUW3		0	2347388532	0	0.007655	42.48	0.000567762	2	920.521	0.701974	460.764	31.237	0
	High	SPFGGGRPGR	3	1	1	C6SUW3		0	1.82969e+09	0	0.005441	40.87	0.00142004	2	987.512	0.554394	494.26	16.114	1
	High	RLQTQVFK	2	2	1	C6SUW3		0	1.04188e+09	0	0.0002503	37.28	0.00118788	2	1019.6	0.0958651	510.304	19.5164	1
	High	QVVNIPSFVVR	2	1	1	C6SUW3		0	9.35112e+08	0	8.484e-06	37.01	0.00218974	2	1257.73	-1.90009	629.368	44.5189	0
	High	IEDFLERR	2	2	1	C6SUW3		0	407162314	0	0.000208	36.74	0.00396134	2	1077.57	-1.14964	539.287	28.1376	1
	High	KQVVNIPSFVVR	3	1	1	C6SUW3		0	1.09303e+08	0	0.001201	30.09	0.00504437	2	1385.83	1.97561	693.418	69.8503	1
	High	ELLTLDEKDEKR	1	2	1	C6SUW3		0	3.35151e+07	0	1.184e-05	26.37	0.0792368	3	1488.79	0.334125	496.935	38.8112	2
	High	VNGRIPSVFSK	1	2	1	C6SUW3		0	355540284	0	1.404e-05	23.33	0.0664257	3	1203.69	1.53916	401.9	27.5551	1
	High	QVVNIPSFVVRLDSQK	2	1	1	C6SUW3		0	82499591	0	4.359e-06	22.04	0.0590788	3	1829.03	-0.295965	610.347	45.4752	1
	High	ARLDQELK	3	2	1	C6SUW3		0	857609552	0.001	0.03237	35.12	0.00398355	2	972.548	0.280383	486.777	18.8209	1
	High	IEDFLER	2	2	1	C6SUW3		0	455710906	0.001	0.01288	33.47	0.00546483	2	921.467	-0.234924	461.237	59.806	0
A0A0B4LFL3	Eukaryotic translation elongation factor 1 beta, isoform C OS=Drosophila melanogaster OX=7227 GN=eEF1beta PE=3 SV=1 - [A0A0B4LFL3_DROME]	2057	2.10064e+09	54	78.38	1	15	15	222	24.2321	4.57666
	A2	Sequence	# PSMs	# Proteins	# Protein Groups	Protein Group Accessions	Modifications	ΔCn	Area	q-Value	PEP	IonScore	Exp Value	Charge	MH+ [Da]	ΔM [ppm]	m/z [Da]	RT [min]	# Missed Cleavages
	High	IEEFEDFVQSVDIAAFNK	6	1	1	A0A0B4LFL3		0	4.66614e+07	0	1.504e-12	124.67	4.45257e-12	2	2101.01	0.333121	1051.01	127.276	0
	High	ELNAFLADNSYISGYTPSK	8	1	1	A0A0B4LFL3		0	1.10119e+09	0	8.206e-10	105.59	3.38171e-10	2	2090.01	-0.059972	1045.51	129.314	0
	High	TIEMDGLLWGASK	2	1	1	A0A0B4LFL3		0	363592469	0	9.103e-08	103.57	6.48324e-10	2	1420.72	0.685704	710.861	49.908	0
	High	ADLSVFDALGK	3	1	1	A0A0B4LFL3		0	1.96502e+09	0	5.982e-08	99.18	2.57868e-09	2	1135.6	0.0912324	568.303	47.7798	0
	High	AAWSGTPLPQLAGGKPTVAAAAK	3	1	1	A0A0B4LFL3		0	777743150	0	8.454e-11	92.12	6.26037e-09	2	2163.19	-0.228048	1082.1	75.1485	1
	High	APSADNVNVAR	2	1	1	A0A0B4LFL3		0	683264676	0	3.389e-06	79.07	8.29994e-08	2	1113.56	0.195503	557.286	20.8154	0
	High	aFGDVTTPQGLK	2	1	1	A0A0B4LFL3	N-Term(Acetyl)	0	480212409	0	1.101e-06	67.04	3.82544e-06	2	1275.66	0.574374	638.333	46.3605	0
	High	IEEFEDFVQSVDIAAFNKI	6	1	1	A0A0B4LFL3		0	2.17593e+08	0	2.879e-10	64.77	5.20145e-06	3	2214.1	-0.0594377	738.704	65.4921	1
	High	SSVLLDVKPWDDETDMK	4	1	1	A0A0B4LFL3		0	5.8401e+08	0	1.223e-10	64.06	4.18167e-06	2	1977.95	0.835703	989.478	44.1455	1
	High	AFGDVTTPQGLK	2	1	1	A0A0B4LFL3		0	1944976976	0	3.138e-07	56.56	3.83089e-05	2	1233.65	-0.143399	617.327	33.6759	0
	High	LQIMcVIEDDK	3	1	1	A0A0B4LFL3	C5(Carbamidomethyl)	0	706476378	0	9.415e-06	56.04	4.52972e-05	2	1363.66	0.477112	682.334	43.6395	0
	High	HIASFEAAER	4	1	1	A0A0B4LFL3		0	1.55814e+09	0	9.216e-05	54.43	3.82213e-05	2	1130.56	0.0497627	565.783	30.9162	0
	High	VSIDLLQEK	3	1	1	A0A0B4LFL3		0	1576717006	0	0.0008992	54.05	5.78519e-05	2	1044.59	0.421637	522.801	70.2622	0
	High	SKKPALIAK	3	1	1	A0A0B4LFL3		0	1.41628e+08	0	0.0001529	51.53	1.05461e-05	3	955.629	-0.621757	319.215	6.81227	2
	High	LVPVGYGINK	1	1	1	A0A0B4LFL3		0	2391912725	0	0.0001945	48.47	0.000213349	2	1059.62	0.96623	530.314	31.9199	0
	High	AAWSGTPLPQLAGGK	1	1	1	A0A0B4LFL3		0	1.14938e+07	0	0.0002786	19.28	0.10977	2	1453.78	1.9887	727.395	79.9532	0
	High	SSVLLDVKPWDDETDmK	1	1	1	A0A0B4LFL3	M16(Oxidation)	0	1.28968e+07	0	0.0001693	8.24	1.52218	3	1993.94	-1.3109	665.318	81.4712	1
Q9VJ19	60S ribosomal protein L30 OS=Drosophila melanogaster OX=7227 GN=RpL30 PE=1 SV=1 - [Q9VJ19_DROME]	793.671	2.08594e+09	18	67.57	1	9	9	111	12.2265	9.5835
	A2	Sequence	# PSMs	# Proteins	# Protein Groups	Protein Group Accessions	Modifications	ΔCn	Area	q-Value	PEP	IonScore	Exp Value	Charge	MH+ [Da]	ΔM [ppm]	m/z [Da]	RT [min]	# Missed Cleavages
	High	VcTLSITDPGDSDIIR	3	1	1	Q9VJ19	C2(Carbamidomethyl)	0	2.73095e+09	0	2.915e-12	131.18	1.23076e-12	2	1761.87	-0.209719	881.438	43.5573	0
	High	TEVQHYSGTNIELGTAcGK	3	1	1	Q9VJ19	C17(Carbamidomethyl)	0	8.6858e+08	0	9.938e-12	97.85	1.41091e-09	2	2064.97	0.501235	1032.99	51.7549	0
	High	LVLIASNTPALR	2	1	1	Q9VJ19		0	544791784	0	8.927e-07	82.52	1.39939e-08	2	1267.77	0.907386	634.391	76.3123	0
	High	LVLIASNTPALRK	4	1	1	Q9VJ19		0	2658307034	0	8.4e-08	66.37	2.30128e-07	3	1395.87	0.771263	465.961	32.128	1
	High	KSEIEYYAMLAK	1	1	1	Q9VJ19		0	47923936	0	4.233e-08	61.34	1.29274e-05	2	1445.73	-1.93276	723.37	35.935	1
	High	SEIEYYAMLAK	2	1	1	Q9VJ19		0	464415360	0	2.301e-05	53.51	5.01363e-05	2	1317.64	2.7889	659.325	82.1952	0
	High	VcTLSITDPGDSDIIRSLETA	1	1	1	Q9VJ19	C2(Carbamidomethyl)	0	3.58495e+07	0	1.32e-08	38.84	0.00178292	2	2263.11	0.767072	1132.06	118.28	1
	High	YFRVcTLSITDPGDSDIIR	1	1	1	Q9VJ19	C5(Carbamidomethyl)	0	0	0	0.002401	29.63	0.0189474	2	2228.11	3.58216	1114.56	91.8582	1
	High	ALESTNAR	1	1	1	Q9VJ19		0	0	0	0.002551	28.41	0.0201896	2	861.442	-0.519013	431.225	10.4279	0
Q9VHN7	LP07963p OS=Drosophila melanogaster OX=7227 GN=anon-WO0118547.344 PE=1 SV=3 - [Q9VHN7_DROME]	3975.62	2.0588e+09	119	71.57	3	40	40	626	67.989	7.10791
	A2	Sequence	# PSMs	# Proteins	# Protein Groups	Protein Group Accessions	Modifications	ΔCn	Area	q-Value	PEP	IonScore	Exp Value	Charge	MH+ [Da]	ΔM [ppm]	m/z [Da]	RT [min]	# Missed Cleavages
	High	VVVVEDHYQQGGLGEAVLSALAGER	6	2	1	Q9VHN7		0	1.50488e+09	0	5.476e-18	118.87	2.28304e-11	2	2596.33	-1.30251	1298.67	108.525	0
	High	GHAAPILYAAWAEAGLFPIADLNNLRK	5	2	1	Q9VHN7		0	1.81134e+09	0	4.366e-15	97.94	1.70336e-09	3	2892.56	3.09655	964.859	123.402	1
	High	GHAAPILYAAWAEAGLFPIADLNNLR	1	2	1	Q9VHN7		0	1.3765e+08	0	4.233e-15	97.69	2.0511e-09	3	2764.45	-1.44086	922.156	64.1381	0
	High	SGPPSVLIDMFGISAR	3	2	1	Q9VHN7		0	120660979	0	4.648e-10	95.65	5.037e-09	3	1646.86	0.778021	549.624	58.0674	0
	High	LGQSEATSLQHK	4	2	1	Q9VHN7		0	640783460	0	4.761e-08	95.59	2.62255e-09	2	1298.67	0.0139941	649.839	17.9965	0
	High	TVAFVSTFATFFTR	16	2	1	Q9VHN7		0	1.31095e+08	0	1.212e-07	90.51	1.40494e-08	2	1594.83	1.44947	797.918	61.9678	0
	High	TSRPNTcVIYDNEEPFTIGR	3	2	1	Q9VHN7	C7(Carbamidomethyl)	0	1804881850	0	4.097e-12	90.33	1.01951e-08	3	2369.12	0.974107	790.379	38.5407	1
	High	IDSDLEGHPTPR	5	2	1	Q9VHN7		0	1162337894	0	8.28e-10	86.14	3.21051e-08	2	1336.65	0.0810167	668.828	22.0623	0
	High	LDNLcVIFDVNR	6	2	1	Q9VHN7	C5(Carbamidomethyl)	0	357708518	0	1.682e-07	82.55	9.56155e-08	2	1477.75	-0.311157	739.377	50.9774	0
	High	VVALDGDTK	2	2	1	Q9VHN7		0	360542444	0	0.0003405	81.11	1.50246e-07	2	917.494	-0.341613	459.25	31.4411	0
	High	TGAAPDVDINNIK	2	2	1	Q9VHN7		0	6.5595e+08	0	1.16e-07	80.4	1.02601e-07	2	1327.68	-1.24273	664.345	32.7	0
	High	HVVNAVNEILKD	5	2	1	Q9VHN7		0	1442336548	0	5.006e-08	80.19	1.36879e-07	2	1350.74	1.2246	675.873	32.4494	1
	High	GRDFPNIEDLDNWHGKPLGDK	3	2	1	Q9VHN7		0	878722590	0	1.021e-15	78.64	1.93534e-07	3	2423.17	-0.750259	808.396	38.8014	2
	High	TIPGSTIFYPSDAVSTER	5	2	1	Q9VHN7		0	2175628536	0	1.089e-07	72.59	7.76639e-07	2	1940.96	1.47706	970.985	88.7938	0
	High	LRIHSINATQASK	5	1	1	Q9VHN7		0	1266476829	0	1.821e-08	72.51	5.77879e-07	2	1438.81	0.343742	719.91	18.4091	1
	High	VIDPFTVKPLDAELIIEHGK	4	2	1	Q9VHN7		0	2189440322	0	2.787e-12	69.6	8.11394e-07	3	2234.24	-0.989307	745.419	48.8461	1
	High	GRDFPNIEDLDNWHGK	3	2	1	Q9VHN7		0	196209564	0	5.541e-10	69.28	9.50158e-07	3	1912.89	-1.29218	638.302	38.6459	1
	High	AVELAANTK	1	3	1	Q9VHN7		0	193631040	0	0.0001065	61.98	8.96926e-06	2	916.511	0.80237	458.759	19.1629	0
	High	KIDSDLEGHPTPR	1	2	1	Q9VHN7		0	99781478	0	1.642e-09	60.82	1.57723e-05	3	1464.74	0.315249	488.92	19.4777	1
	High	LDVYRDRLEAFGFNAVVVDGHDVEELSK	2	2	1	Q9VHN7		0	790378092	0	5.658e-13	59.34	1.71127e-05	4	3192.6	0.203961	798.905	48.8894	2
	High	IHSINATQASK	4	1	1	Q9VHN7		0	8.48386e+07	0	3.363e-06	57.64	2.04041e-05	2	1169.63	-0.508467	585.317	14.558	0
	High	HLEGLIVNK	2	2	1	Q9VHN7		0	1663156850	0	2.356e-05	51.25	4.04943e-05	2	1022.6	0.597349	511.804	24.981	0
	High	HLYVPTVPR	3	2	1	Q9VHN7		0	1473264096	0	0.0004957	49.34	8.96377e-05	2	1081.62	0.527937	541.312	49.8717	0
	High	AFHcAAITK	2	2	1	Q9VHN7	C4(Carbamidomethyl)	0	531143786	0	1.034e-05	47.58	0.000273221	2	1018.51	0.896213	509.761	17.8309	0
	High	LAYGTALAK	2	3	1	Q9VHN7		0	1013487782	0	0.0001469	44.04	0.000199201	2	907.525	0.589354	454.266	26.5152	0
	High	LSSPPAYK	2	2	1	Q9VHN7		0	284953364	0	0.005089	43.11	0.000625475	2	862.467	0.123227	431.737	20.3936	0
	High	HPRDPSSDRFILSK	4	2	1	Q9VHN7		0	7.84639e+08	0	3.094e-06	40.29	0.00153874	3	1654.87	0.412161	552.294	20.9336	2
	High	TYVVVGDGESAEGSIWESLHFAGHYK	1	2	1	Q9VHN7		0	6.12849e+07	0	1.246e-08	38.76	0.00139032	4	2838.34	-0.600157	710.339	128.97	0
	High	PLDAELIIEHGK	2	2	1	Q9VHN7		0	310325568	0	4.74e-06	36.58	0.00264842	3	1334.73	1.39373	445.583	35.7836	0
	High	TIPGSTIFYPSDAVSTERAVELAANTK	1	2	1	Q9VHN7		0	1.08933e+08	0	4.294e-08	35.48	0.00484168	3	2838.46	2.37246	946.824	101.243	1
	High	VVVVEDHYQQGGLGEAVLSALAGERNFVVK	1	2	1	Q9VHN7		0	2.69591e+08	0	4.519e-11	34.21	0.0062018	4	3183.68	1.60692	796.677	53.1463	1
	High	LDNLcVIFDVNRLGQSEATSLQHK	2	2	1	Q9VHN7	C5(Carbamidomethyl)	0	437524362	0	9.848e-08	34.06	0.0066946	3	2757.39	-3.4514	919.801	97.6539	1
	High	VIDPFTVK	1	3	1	Q9VHN7		0	688291344	0	0.001661	33.01	0.00672546	2	918.53	0.715998	459.769	36.823	0
	High	NKPTAIIAK	1	2	1	Q9VHN7		0	990870396	0	0.003871	32.23	0.00275269	2	955.594	0.268209	478.301	15.749	1
	High	NLDPQRYIEcFIAEQNLVGVAVGAAcRR	1	2	1	Q9VHN7	C10(Carbamidomethyl); C26(Carbamidomethyl)	0	41469173	0	9.213e-10	32.13	0.00958328	4	3219.62	0.298257	805.659	59.1776	2
	High	LEAFGFNAVVVDGHDVEELSK	1	2	1	Q9VHN7		0	6.27204e+06	0	5.615e-10	31.37	0.0113431	3	2275.13	2.90585	759.048	101.902	0
	High	SSDEVLLIGAGITLYEcLAAADQLEK	2	2	1	Q9VHN7	C17(Carbamidomethyl)	0	3.87313e+06	0	4.799e-05	26.1	0.0484805	3	2779.4	-0.921108	927.14	72.3147	0
	High	LTPKPVPK	2	2	1	Q9VHN7		0	1.94386e+08	0	0.0006737	21.67	0.00679157	2	879.566	0.218913	440.287	13.976	1
	High	DPSSDRFILSK	2	2	1	Q9VHN7		0	146311853	0	0.0001547	14.26	0.556835	3	1264.65	0.781379	422.223	29.7621	1
	High	IGQNNLR	1	2	1	Q9VHN7		0	9.53904e+07	0.001	0.01699	39.8	0.0005288	2	814.453	0.572745	407.73	20.3773	0
M9PD75	Porin, isoform D OS=Drosophila melanogaster OX=7227 GN=porin PE=3 SV=1 - [M9PD75_DROME]	3210.27	2.04992e+09	103	71.63	1	16	16	282	30.5315	6.96143
	A2	Sequence	# PSMs	# Proteins	# Protein Groups	Protein Group Accessions	Modifications	ΔCn	Area	q-Value	PEP	IonScore	Exp Value	Charge	MH+ [Da]	ΔM [ppm]	m/z [Da]	RT [min]	# Missed Cleavages
	High	TSSGIEFNTAGHSNQESGK	6	1	1	M9PD75		0	1074131590	0	9.126e-13	156.87	1.86058e-15	2	1950.88	-0.703424	975.942	21.6678	0
	High	LTTNNFALGYTTK	4	1	1	M9PD75		0	2575808452	0	8.994e-07	131.38	9.5703e-13	2	1443.75	0.415159	722.378	36.274	0
	High	WNTDNTLFTEVAVQDQLLEGLK	8	1	1	M9PD75		0	677875153	0	4.576e-12	105.67	4.47182e-10	3	2534.28	1.23523	845.432	62.9505	0
	High	ADSDVNIDLK	4	1	1	M9PD75		0	1604302780	0	3.464e-05	86.47	3.06577e-08	2	1089.54	1.44055	545.276	30.228	0
	High	VNNASQVGLGYQQK	3	1	1	M9PD75		0	1.11744e+09	0	6.709e-09	85.18	4.76321e-08	2	1505.77	0.207463	753.389	41.5595	0
	High	DFVLHTAVNDGQEFSGSIFQR	24	1	1	M9PD75		0	271665122	0	2.49e-10	81.55	9.13294e-08	3	2367.14	1.11188	789.718	50.4126	0
	High	LSLEGNFAPQSGNK	6	1	1	M9PD75		0	1969659096	0	1.879e-06	64.06	5.90931e-06	2	1461.73	-2.74035	731.368	34.376	0
	High	LRDGVTLTLSTLVDGK	24	1	1	M9PD75		0	380376120	0	3.15e-09	62.35	5.79193e-06	3	1687.96	0.793245	563.325	44.6114	1
	High	YQLDDDASVR	3	1	1	M9PD75		0	1419470516	0	1.496e-05	58.31	1.15843e-05	2	1181.54	0.336399	591.276	27.6941	0
	High	LDVGVQLSWASGTSNTK	6	1	1	M9PD75		0	58968176	0	1.818e-07	52.62	8.94371e-05	2	1762.89	-4.25854	881.948	129.058	0
	High	VAYGHENVK	3	1	1	M9PD75		0	216616872	0	8.117e-06	52.53	6.1711e-05	2	1016.52	-0.323361	508.761	13.1356	0
	High	YQLDDDASVRAK	1	1	1	M9PD75		0	26335995	0	8.845e-08	46.9	0.000287885	3	1380.68	0.138336	460.897	37.4974	1
	High	APPSYSDLGK	3	1	1	M9PD75		0	1548857760	0	0.0002153	46.27	0.000262013	2	1034.52	1.61822	517.762	25.4013	0
	High	VFGSLETK	2	1	1	M9PD75		0	1.53333e+09	0	0.007864	40.73	0.000912901	2	880.478	0.23559	440.742	41.1178	0
	High	GYNFGLWK	3	1	1	M9PD75		0	1227695800	0	0.00169	38.8	0.000599807	2	984.494	-0.0511149	492.751	42.0197	0
	High	DYGLTLTEK	3	1	1	M9PD75		0	765667872	0	0.0001467	38.62	0.00185496	2	1039.53	0.856578	520.269	36.3413	0
A1Z6L9	FI21274p1 OS=Drosophila melanogaster OX=7227 GN=Trap1 PE=1 SV=1 - [A1Z6L9_DROME]	550.37	2.04555e+09	26	24.89	1	15	16	691	77.9145	7.59131
	A2	Sequence	# PSMs	# Proteins	# Protein Groups	Protein Group Accessions	Modifications	ΔCn	Area	q-Value	PEP	IonScore	Exp Value	Charge	MH+ [Da]	ΔM [ppm]	m/z [Da]	RT [min]	# Missed Cleavages
	High	GVVDSEDIPLNLSR	4	3	2	M9PBL3;A1Z6L9		0	5896430748	0	5.68e-08	106.95	2.53305e-10	2	1513.79	1.1771	757.397	43.2989	0
	High	FISNSFDVPR	2	1	1	A1Z6L9		0	9.89375e+07	0	5.531e-06	57.01	2.14993e-05	2	1181.6	2.18389	591.302	36.6285	0
	High	FRYTSLSAGGENLAGK	1	1	1	A1Z6L9		0	69854928	0	2.678e-08	46.11	0.000320827	3	1670.85	0.495409	557.622	55.7386	1
	High	LSSVISTR	1	1	1	A1Z6L9		0	2.36088e+07	0	0.0044	45.81	0.000174511	2	862.5	1.23069	431.754	34.8306	0
	High	ELISNASDALEK	1	1	1	A1Z6L9		0	54301004	0	5.153e-05	42.93	0.000725796	2	1289.66	3.1961	645.335	59.8448	0
	High	DLAQLIAK	2	1	1	A1Z6L9		0	44059936	0	0.00153	41.05	0.000710638	2	871.525	0.602224	436.266	40.095	0
	High	SLYSDHEVFVR	2	1	1	A1Z6L9		0	66821542	0	4.828e-05	39.14	0.00121899	2	1351.66	-0.196308	676.336	55.2821	0
	High	PLWLLEPQSISK	1	1	1	A1Z6L9		0	36645052	0	0.001698	37.86	0.00154679	2	1410.8	1.50682	705.904	99.6704	0
	High	EQHHDFYR	3	1	1	A1Z6L9		0	4.26843e+07	0	0.006344	34.67	0.000562968	3	1131.5	0.481413	377.837	12.8206	0
	High	ELLQNSSLIRK	2	1	1	A1Z6L9		0	65018530	0	2.511e-05	27.36	0.0180899	3	1300.76	0.949731	434.258	47.2003	1
	High	TDcREYADEERIK	2	1	1	A1Z6L9	C3(Carbamidomethyl)	0	22765191	0	8.979e-06	25.87	0.0159175	3	1684.76	0.773469	562.258	19.7915	2
	High	FALLQPELEINPK	1	1	1	A1Z6L9		0	0	0	2.247e-05	17.67	0.176132	2	1511.85	1.67446	756.428	49.3003	0
	High	EELVSNLGTIAR	1	1	1	A1Z6L9		0	1.41289e+08	0	0.0002968	14.88	0.988265	2	1301.71	0.999986	651.357	71.9399	0
	High	KLVSVEK	1	1	1	A1Z6L9		0	2.27844e+07	0.001	0.0103	33.6	0.00157146	2	802.504	0.483995	401.755	15.0131	1
	High	AAVPNAPGLR	1	1	1	A1Z6L9		0	6.80864e+07	0.001	0.01398	29.67	0.00528684	2	965.554	0.790319	483.28	44.4265	0
	High	DRPLEIR	1	1	1	A1Z6L9		0	3.20693e+07	0.006	0.2661	11.49	0.517992	2	898.507	-3.39164	449.757	29.4911	1
Q3YMU0	Protein disulfide-isomerase (Fragment) OS=Drosophila melanogaster OX=7227 GN=ERp60 PE=1 SV=1 - [Q3YMU0_DROME]	2378.69	2045007382	82	65.64	1	30	30	489	55.3361	5.87158
	A2	Sequence	# PSMs	# Proteins	# Protein Groups	Protein Group Accessions	Modifications	ΔCn	Area	q-Value	PEP	IonScore	Exp Value	Charge	MH+ [Da]	ΔM [ppm]	m/z [Da]	RT [min]	# Missed Cleavages
	High	FEGSSESDLSTFVK	3	1	1	Q3YMU0		0	733136488	0	1.122e-08	105.16	1.98113e-10	2	1532.71	0.818714	766.86	74.4424	0
	High	IFRQDEVSQDYNGPR	5	1	1	Q3YMU0		0	1270860124	0	2.523e-11	104.69	3.75286e-10	2	1823.87	0.436556	912.438	28.1799	1
	High	DFQNPLITAYYSVDYQK	5	1	1	Q3YMU0		0	2.60923e+08	0	7.436e-10	103.31	6.2999e-10	3	2064.99	0.0716373	689.002	57.7668	0
	High	DDFQHELNEYGYDFVGDKPVVLAR	3	1	1	Q3YMU0		0	9.90616e+07	0	7.481e-16	97.12	1.86325e-09	3	2826.34	0.327106	942.784	51.0889	1
	High	MDATANDVPPEFNVR	2	1	1	Q3YMU0		0	223523333	0	9.457e-10	87.81	1.35773e-08	2	1675.78	1.62789	838.392	76.0623	0
	High	YALKDEFSVENLQDFVEK	2	1	1	Q3YMU0		0	106725644	0	2.793e-11	84.98	4.54293e-08	2	2174.06	-0.35904	1087.54	102.489	1
	High	DTLIEFYAPWcGHcK	4	1	1	Q3YMU0	C11(Carbamidomethyl); C14(Carbamidomethyl)	0	638711306	0	3.265e-09	82.76	3.1515e-08	2	1896.84	0.411755	948.924	98.0315	0
	High	LLANELEPYIK	2	1	1	Q3YMU0		0	2247665306	0	4.565e-06	73.71	6.19246e-07	2	1302.73	0.533802	651.869	43.6278	0
	High	AAEIVKDDDPPIK	4	1	1	Q3YMU0		0	1294706782	0	8.764e-08	72.6	5.49541e-07	2	1410.75	0.370848	705.878	25.3231	1
	High	LQDEDVAIVK	2	1	1	Q3YMU0		0	1.3609e+09	0	6.796e-05	70.91	1.63409e-06	2	1129.61	0.901384	565.309	51.3225	0
	High	GFPTLFWLPK	2	1	1	Q3YMU0		0	2170166696	0	6.396e-05	65.12	3.33757e-06	2	1205.67	0.708087	603.34	118.212	0
	High	DEFSVENLQDFVEK	2	1	1	Q3YMU0		0	879725052	0	5.225e-07	60.23	8.58319e-06	2	1698.79	4.31902	849.9	110.5	0
	High	SEPIPESNDAPVK	2	1	1	Q3YMU0		0	1650232336	0	3.321e-06	58.87	1.63445e-05	2	1382.68	1.49063	691.845	26.6627	0
	High	DTTLFGYFSDSDSK	6	1	1	Q3YMU0		0	515861642	0	9.155e-09	58.69	3.58299e-06	2	1582.69	0.0203433	791.849	53.4129	0
	High	IFRQDEVSQDYNGPREASGIAK	4	1	1	Q3YMU0		0	469261305	0	2.847e-10	57.71	2.91426e-05	3	2480.22	0.038957	827.41	29.3027	2
	High	NFDDLVINNGK	2	1	1	Q3YMU0		0	593455662	0	9.97e-07	53.2	7.03586e-05	2	1248.62	0.915547	624.815	37.8439	0
	High	DDFQHELNEYGYDFVGDKPVVLARDEK	2	1	1	Q3YMU0		0	595016680	0	1.159e-10	50.03	8.9877e-05	4	3198.5	-1.28938	800.38	47.0941	2
	High	YSVSGYPTLK	2	1	1	Q3YMU0		0	1361679448	0	2.892e-05	48.54	0.000160953	2	1114.58	0.663551	557.793	32.1747	0
	High	ENFHGLVGHR	4	1	1	Q3YMU0		0	1717190144	0	2.239e-05	46.38	0.000254309	3	1165.59	0.910762	389.201	18.9157	0
	High	RLKPEYAK	4	1	1	Q3YMU0		0	1325043245	0	2.525e-05	44.5	0.000315784	3	1004.59	-0.0627776	335.534	6.81527	2
	High	YRFGHSSEK	3	1	1	Q3YMU0		0	7.78545e+08	0	4.754e-05	43.64	0.000458465	2	1110.53	0.265893	555.77	6.60981	1
	High	QHETTLVMFYAPWcGHcK	2	1	1	Q3YMU0	C14(Carbamidomethyl); C17(Carbamidomethyl)	0	100165562	0	1.384e-07	36.62	0.000783976	3	2265	-1.729	755.672	79.4803	0
	High	NKPVSYNGGREVDDFLK	3	1	1	Q3YMU0		0	696521502	0	2.953e-05	36.29	0.00370067	2	1937.98	4.38541	969.494	52.9911	2
	High	FESSSIK	1	1	1	Q3YMU0		0	6.94168e+07	0	0.00327	35.37	0.000377523	2	797.404	0.519446	399.206	22.3586	0
	High	EVDDFLK	2	1	1	Q3YMU0		0	1.99633e+08	0	0.008423	26.93	0.0158159	2	865.431	0.989764	433.219	33.896	0
	High	APHLSNKFESSSIK	1	1	1	Q3YMU0		0	6.63945e+06	0	0.0005637	18.51	0.214917	3	1544.81	0.596239	515.607	33.2412	1
	High	EFVGQINFAIASK	1	1	1	Q3YMU0		0	2.15916e+07	0	3.442e-05	18.23	0.219459	2	1423.76	1.91639	712.384	129.117	0
	High	IVLIRAPHLSNK	2	1	1	Q3YMU0		0	356066223	0	0.000183	17.5	0.0337873	4	1360.84	0.385727	340.966	27.1988	1
	High	TVAELKK	3	1	1	Q3YMU0		0	9.86474e+07	0.001	0.01219	33.61	0.00330989	2	788.488	-0.0949579	394.747	7.14371	1
	High	NKPVSYNGGR	2	1	1	Q3YMU0		0	6837207	0.003	0.1189	19.38	0.138991	2	1091.56	2.88965	546.285	7.82463	1
X2JE06	GEO07624p1 OS=Drosophila melanogaster OX=7227 GN=RpL24 PE=1 SV=1 - [X2JE06_DROME]	701.17	2033027382	28	36.77	1	10	10	155	17.5089	11.063
	A2	Sequence	# PSMs	# Proteins	# Protein Groups	Protein Group Accessions	Modifications	ΔCn	Area	q-Value	PEP	IonScore	Exp Value	Charge	MH+ [Da]	ΔM [ppm]	m/z [Da]	RT [min]	# Missed Cleavages
	High	AIVGASLAEILAK	5	1	1	X2JE06		0	2829096978	0	3.222e-07	93.96	2.4911e-09	2	1255.76	-0.647601	628.384	49.0985	0
	High	IGLcAFSGYK	2	1	1	X2JE06	C4(Carbamidomethyl)	0	913284360	0	4.707e-05	68.2	1.1049e-06	2	1115.56	1.12314	558.282	37.5156	0
	High	RNMKPEVR	6	1	1	X2JE06		0	144012421	0	1.18e-05	65.23	5.21854e-06	3	1029.56	-0.159673	343.859	5.23965	2
	High	AIVGASLAEILAKR	1	1	1	X2JE06		0	2.51147e+07	0	1.787e-06	58.58	4.99232e-06	3	1411.86	0.743802	471.293	85.3379	1
	High	VTWTVLYR	4	1	1	X2JE06		0	1760166880	0	0.0003979	52.36	4.64612e-05	2	1037.58	0.290387	519.293	76.3673	0
	High	GIEEEASKK	4	1	1	X2JE06		0	3.02313e+07	0	0.000499	42.77	0.000924779	2	990.51	-0.524085	495.759	11.7693	1
	High	GIEEEASK	1	1	1	X2JE06		0	3.63351e+07	0	0.005058	32.97	0.00391113	2	862.415	0.175753	431.711	15.3026	0
	High	RNmKPEVR	1	1	1	X2JE06	M3(Oxidation)	0	5.06232e+06	0	0.004628	27.83	0.0329632	3	1045.56	-0.0806045	349.191	5.34549	2
	High	KVTWTVLYR	1	1	1	X2JE06		0	0	0	0.003068	21.55	0.0503886	3	1165.67	0.614067	389.229	58.5385	1
	High	SFTFLDKK	1	1	1	X2JE06		0	9.19532e+07	0	0.001452	20.58	0.102373	2	985.534	-1.38824	493.271	45.9676	1
	High	SFTFLDK	2	1	1	X2JE06		0	1509818288	0.001	0.01915	44.65	0.000246793	2	857.441	0.752591	429.224	36.3244	0
M9PIM0	Ribosomal protein L10, isoform E OS=Drosophila melanogaster OX=7227 GN=RpL10 PE=4 SV=1 - [M9PIM0_DROME]	906.444	1.96172e+09	43	59.17	1	17	17	218	25.5112	9.84717
	A2	Sequence	# PSMs	# Proteins	# Protein Groups	Protein Group Accessions	Modifications	ΔCn	Area	q-Value	PEP	IonScore	Exp Value	Charge	MH+ [Da]	ΔM [ppm]	m/z [Da]	RT [min]	# Missed Cleavages
	High	KATVEDFPLcVHLVSDEYEQLSSEALEAGR	3	1	1	M9PIM0	C10(Carbamidomethyl)	0	1.03108e+09	0	3.212e-16	93.39	6.87213e-09	3	3392.65	4.94756	1131.55	114.449	1
	High	ATVEDFPLcVHLVSDEYEQLSSEALEAGR	4	1	1	M9PIM0	C9(Carbamidomethyl)	0	1320591947	0	7.174e-13	82.1	6.22761e-08	3	3264.54	0.0560728	1088.85	127.546	0
	High	YRPEHGPIAAWEK	6	1	1	M9PIM0		0	2342495240	0	7.82e-06	61.3	1.08231e-05	2	1553.79	-0.0418522	777.397	39.3952	1
	High	GAFGKPQGTVAR	4	1	1	M9PIM0		0	1.24845e+09	0	1.481e-06	58.49	2.54843e-05	2	1188.65	0.747311	594.828	17.8414	1
	High	IGQPIMSVR	3	1	1	M9PIM0		0	726716653	0	0.0004205	55.34	4.13768e-05	2	1000.56	-0.0936683	500.784	29.7164	0
	High	AQVIEALR	2	1	1	M9PIM0		0	344424876	0	0.000582	53.2	3.01537e-05	2	899.531	0.192537	450.269	27.81	0
	High	MRLHPFHVIR	2	1	1	M9PIM0		0	302922916	0	0.0001071	43.23	0.000489595	4	1305.74	-0.596623	327.189	22.7315	1
	High	IRIFDLGR	2	1	1	M9PIM0		0	4.74308e+08	0	0.0002096	41.91	0.000615182	3	989.59	0.877811	330.535	35.8589	1
	High	YEELRDDNRLEPDGcNVK	4	1	1	M9PIM0	C15(Carbamidomethyl)	0	559239768	0	1.424e-05	41	0.000603689	2	2222.01	0.27222	1111.51	46.0307	2
	High	IRIFDLGRK	1	1	1	M9PIM0		0	671522970	0	0.0002867	39.2	0.000396747	3	1117.69	1.37853	373.233	28.1698	2
	High	VRIGQPIMSVR	3	1	1	M9PIM0		0	2.08737e+08	0	0.0001437	37.29	0.00153043	3	1255.73	-0.291592	419.248	29.1402	1
	High	LHPFHVIR	1	1	1	M9PIM0		0	1352762466	0	0.003064	29.41	0.008935	3	1018.59	-0.164259	340.203	21.0202	0
	High	IGQPImSVR	1	1	1	M9PIM0	M6(Oxidation)	0	2.63563e+07	0	0.006378	27.95	0.0272552	2	1016.56	0.166741	508.782	37.4713	0
	High	AQVIEALRR	2	1	1	M9PIM0		0	2189908448	0	0.004381	25.2	0.0196297	3	1055.63	0.917419	352.549	23.0487	1
	High	MLScAGADR	1	1	1	M9PIM0	C4(Carbamidomethyl)	0	3.20045e+07	0	0.004167	23.66	0.0182974	2	980.428	-1.30191	490.717	25.3666	0
	High	mLScAGADRLQTGMR	1	1	1	M9PIM0	M1(Oxidation); C4(Carbamidomethyl)	0	1.47789e+07	0	6.114e-05	17.98	0.10827	3	1682.78	1.36906	561.598	43.9531	1
	High	ERYEELRDDNRLEPDGcNVK	1	1	1	M9PIM0	C17(Carbamidomethyl)	0	2.17654e+07	0	0.006952	2.92	4.6456	3	2507.16	1.09505	836.392	45.2003	3
	High	MLScAGADRLQTGMR	1	1	1	M9PIM0	C4(Carbamidomethyl)	0	1.45631e+08	0.001	0.01097	11.46	0.796663	3	1666.78	0.455291	556.266	49.7092	1
	High	IFDLGRK	1	1	1	M9PIM0		0	78235020	0.004	0.1513	23.51	0.0269622	2	848.499	0.691789	424.753	24.3151	1
E2QD65	Ribosomal protein S19a, isoform C OS=Drosophila melanogaster OX=7227 GN=RpS19a PE=1 SV=1 - [E2QD65_DROME]	838.723	1.95947e+09	33	66.67	1	15	15	156	17.2803	10.1108
	A2	Sequence	# PSMs	# Proteins	# Protein Groups	Protein Group Accessions	Modifications	ΔCn	Area	q-Value	PEP	IonScore	Exp Value	Charge	MH+ [Da]	ΔM [ppm]	m/z [Da]	RT [min]	# Missed Cleavages
	High	DLDRIANQIVFK	4	1	1	E2QD65		0	971414972	0	1.072e-06	72.05	1.07594e-06	2	1431.8	-0.293168	716.401	42.3265	1
	High	ALQALEHAR	2	1	1	E2QD65		0	2410491572	0	4.788e-05	67.09	1.74913e-06	2	1008.56	0.694456	504.783	18.8847	0
	High	SPAGVGSITK	2	1	1	E2QD65		0	978951280	0	0.00014	65.6	3.89723e-06	2	916.51	0.00322845	458.759	20.6504	0
	High	QTGPIVISK	2	1	1	E2QD65		0	1181542336	0	0.0001786	65.21	3.04314e-06	2	942.563	1.26847	471.785	24.98	0
	High	RNGVHPSHFcR	4	1	1	E2QD65	C10(Carbamidomethyl)	0	3.81579e+08	0	1.237e-05	56.86	1.82366e-05	4	1366.65	-0.203211	342.419	6.94674	1
	High	LKVPDQMDIVK	3	1	1	E2QD65		0	503404936	0	4.753e-06	56.51	3.35036e-05	3	1285.72	0.853084	429.245	62.3413	1
	High	VPDQMDIVK	2	1	1	E2QD65		0	446741304	0	0.000104	51.49	7.27317e-05	2	1044.54	0.589122	522.774	30.4547	0
	High	ELAPYDPDWFYVR	2	1	1	E2QD65		0	2.09709e+09	0	1.837e-05	51.39	7.11584e-05	2	1670.79	0.638646	835.897	54.2912	0
	High	IANQIVFK	1	1	1	E2QD65		0	1042685643	0	0.000747	49.17	8.95843e-05	2	932.557	0.809822	466.782	29.6631	0
	High	DIDQHAVTK	3	1	1	E2QD65		0	179463100	0	1.102e-05	47.62	0.000114168	2	1026.52	0.515289	513.765	16.2745	0
	High	AVAVFLK	2	1	1	E2QD65		0	1370835788	0	0.003141	37.26	0.000234915	2	747.477	0.306095	374.242	31.6909	0
	High	AVAVFLKK	2	1	1	E2QD65		0	6.2889e+07	0	0.002548	36.28	0.000317932	2	875.572	0.819788	438.29	34.0904	1
	High	NGVHPSHFcR	1	1	1	E2QD65	C9(Carbamidomethyl)	0	35696075	0	0.0001267	27.75	0.0105765	3	1210.55	0.122026	404.189	12.4847	0
	High	LKVPDQmDIVK	1	1	1	E2QD65	M7(Oxidation)	0	4.3865e+07	0	9.545e-05	20.79	0.134223	3	1301.71	0.833817	434.576	49.2635	1
	High	HLYHRSPAGVGSITK	1	1	1	E2QD65		0	5.1715e+07	0	1.097e-05	14.22	0.459808	4	1622.88	0.626462	406.475	25.0508	1
	High	LSSIGQR	1	1	1	E2QD65		0	1.32866e+08	0.001	0.03129	37.17	0.00141981	2	760.431	0.30612	380.719	19.3325	0
X2JB24	GEO09628p1 OS=Drosophila melanogaster OX=7227 GN=Nplp2 PE=2 SV=1 - [X2JB24_DROME]	253.409	1.94934e+09	10	48.84	2	4	4	86	9.40602	5.40186
	A2	Sequence	# PSMs	# Proteins	# Protein Groups	Protein Group Accessions	Modifications	ΔCn	Area	q-Value	PEP	IonScore	Exp Value	Charge	MH+ [Da]	ΔM [ppm]	m/z [Da]	RT [min]	# Missed Cleavages
	High	AQGDFNEFIEK	2	2	1	X2JB24		0	2105936790	0	1.028e-05	63.47	4.4978e-06	2	1297.61	0.778273	649.307	36.2749	0
	High	EESNPAQEFLTK	4	2	1	X2JB24		0	2086006648	0	4.567e-06	48.24	0.000128973	2	1392.66	0.365594	696.836	67.4414	0
	High	KVEGLFK	2	2	1	X2JB24		0	1.65609e+09	0	0.009073	34	0.0014929	2	820.492	-0.790101	410.75	27.9827	1
	High	DGLNTVQEGLQK	2	2	1	X2JB24		0	0	0	2.976e-05	31.76	0.0106022	2	1301.67	0.35358	651.339	56.4291	0
X2JCX8	GEO12513p1 OS=Drosophila melanogaster OX=7227 GN=RpS14b PE=2 SV=1 - [X2JCX8_DROME]	883.177	1.90696e+09	33	73.51	1	11	11	151	16.2547	10.3452
	A2	Sequence	# PSMs	# Proteins	# Protein Groups	Protein Group Accessions	Modifications	ΔCn	Area	q-Value	PEP	IonScore	Exp Value	Charge	MH+ [Da]	ΔM [ppm]	m/z [Da]	RT [min]	# Missed Cleavages
	High	ADRDEASPYAAMLAAQDVAEK	3	1	1	X2JCX8		0	710028845	0	7.679e-11	77.17	1.8803e-07	3	2222.04	-0.378883	741.351	42.0654	1
	High	EEVQVQLGPQVR	4	1	1	X2JCX8		0	2457351196	0	4.698e-08	75.7	3.56628e-07	2	1381.74	0.430509	691.376	33.6782	0
	High	TPGPGAQSALR	2	1	1	X2JCX8		0	1637600478	0	8.553e-06	64.65	2.96494e-06	2	1054.56	0.435653	527.786	20.9157	0
	High	IEDVTPIPSDSTR	2	1	1	X2JCX8		0	191948073	0	1.547e-08	63.05	6.81244e-06	2	1429.72	-0.607987	715.362	33.1186	0
	High	IGRIEDVTPIPSDSTR	4	1	1	X2JCX8		0	1625940540	0	1.492e-07	52.87	6.97162e-05	3	1755.92	-0.0479511	585.979	34.2789	1
	High	TKTPGPGAQSALR	1	1	1	X2JCX8		0	16697357	0	6.835e-07	50.51	8.53633e-05	3	1283.71	1.31366	428.574	24.81	1
	High	TLGITALHIK	3	1	1	X2JCX8		0	1326571341	0	0.000123	46.55	2.87702e-05	2	1066.66	0.19282	533.835	59.6809	0
	High	VKADRDEASPYAAMLAAQDVAEK	3	1	1	X2JCX8		0	176350096	0	1.383e-08	42.96	0.000885193	4	2449.2	0.249312	613.056	37.5284	2
	High	VQKEEVQVQLGPQVR	1	1	1	X2JCX8		0	3.48105e+07	0	2.068e-07	35.23	0.00281921	3	1736.97	0.167588	579.66	50.6025	1
	High	DGEIVFGVAHIYASFNDTFVHVTDLSGRETIAR	7	1	1	X2JCX8		0	6.84698e+07	0	1.577e-12	33.88	0.00693697	4	3636.8	-2.36141	909.955	126.89	1
	High	ADRDEASPYAAmLAAQDVAEK	2	1	1	X2JCX8	M12(Oxidation)	0	93401790	0	6.545e-06	28.04	0.0119348	3	2238.03	-2.14032	746.681	34.4001	1
	High	IGRIEDVTPIPSDSTRR	1	1	1	X2JCX8		0	7.57244e+07	0	4.903e-06	19.77	0.124418	4	1912.03	0.467657	478.762	54.7944	2
Q9W227	Peptidyl-prolyl cis-trans isomerase OS=Drosophila melanogaster OX=7227 GN=Dmel\CG2852 PE=1 SV=1 - [Q9W227_DROME]	1624.28	1.89394e+09	43	66.34	1	13	13	205	22.1855	8.74854
	A2	Sequence	# PSMs	# Proteins	# Protein Groups	Protein Group Accessions	Modifications	ΔCn	Area	q-Value	PEP	IonScore	Exp Value	Charge	MH+ [Da]	ΔM [ppm]	m/z [Da]	RT [min]	# Missed Cleavages
	High	HYGAGWLSMANAGK	9	1	1	Q9W227		0	319370292	0	6.218e-13	121.45	5.4785e-12	2	1462.69	2.06007	731.85	33.354	0
	High	DVVIANSGTLPVSEAFSVAK	4	1	1	Q9W227		0	2505624910	0	8.4e-12	100.66	1.58918e-09	2	2004.06	-1.29629	1002.53	105.735	0
	High	DTNGSQFFITTK	2	1	1	Q9W227		0	826723074	0	1.109e-05	88.1	1.28552e-08	2	1358.66	0.641954	679.833	38.8435	0
	High	VFFDITIGGEPAGR	3	1	1	Q9W227		0	480328880	0	9.129e-08	87.65	2.25905e-08	2	1478.76	0.214	739.886	50.4212	0
	High	ILSGMNVVR	2	1	1	Q9W227		0	1255796103	0	0.001536	73.56	7.15902e-07	2	988.562	1.14002	494.785	31.0754	0
	High	ELALKPQGEGYK	4	1	1	Q9W227		0	1217522209	0	3.09e-07	69.61	1.42214e-06	2	1332.72	0.195654	666.862	24.3589	1
	High	QIENSATDAR	1	1	1	Q9W227		0	2.62401e+07	0	1.47e-06	64.95	3.63075e-06	2	1104.53	0.627256	552.768	19.4841	0
	High	QTSWLDGR	1	1	1	Q9W227		0	521335679	0	0.0005557	60.19	1.16778e-05	2	962.47	0.740658	481.739	28.4813	0
	High	SIYGERFEDENFK	3	1	1	Q9W227		0	1.9204e+09	0	2.327e-09	57.47	1.6205e-05	2	1633.75	0.581753	817.379	32.04	1
	High	DFMIQGGDFTK	2	1	1	Q9W227		0	376884826	0	4.716e-06	55.56	1.26477e-05	2	1258.58	1.25834	629.793	82.097	0
	High	IEIGLFGK	2	1	1	Q9W227		0	672949756	0	0.001223	49.57	6.56927e-05	2	876.519	0.263928	438.763	42.4895	0
	High	VFFDITIGGEPAGRIEIGLFGK	6	1	1	Q9W227		0	16962376	0	9.464e-08	47.22	0.000189671	3	2336.27	1.15699	779.427	69.1475	1
	High	QIENSATDARDRPVK	4	1	1	Q9W227		0	2.57836e+08	0	0.0002788	32.54	0.0079399	2	1699.87	0.0533875	850.44	22.9026	2
X2JIQ5	60S ribosomal protein L17 OS=Drosophila melanogaster OX=7227 GN=RpL17 PE=3 SV=1 - [X2JIQ5_DROME]	757.833	1876632674	33	45.7	1	11	11	186	21.5794	10.3013
	A2	Sequence	# PSMs	# Proteins	# Protein Groups	Protein Group Accessions	Modifications	ΔCn	Area	q-Value	PEP	IonScore	Exp Value	Charge	MH+ [Da]	ΔM [ppm]	m/z [Da]	RT [min]	# Missed Cleavages
	High	INPYMSSPcHVEVILTEK	3	1	1	X2JIQ5	C9(Carbamidomethyl)	0	977836592	0	2.006e-11	78.61	2.45143e-07	2	2117.04	-0.153279	1059.02	78.7651	0
	High	SAEFLLQLLR	6	1	1	X2JIQ5		0	2140700376	0	3.189e-07	73.55	3.11307e-07	2	1189.7	1.15055	595.351	56.6658	0
	High	RFNGGVGR	2	1	1	X2JIQ5		0	82668591	0	0.00124	60.77	1.14742e-05	2	862.465	0.518216	431.736	8.72884	1
	High	NTHETAQAIKR	2	1	1	X2JIQ5		0	8.49741e+06	0	2.117e-05	53.78	4.52297e-05	3	1268.67	-0.476276	423.562	3.60029	1
	High	LVVHHIQVNR	3	1	1	X2JIQ5		0	273626936	0	0.000128	48.61	0.000193498	4	1214.71	0.0999399	304.433	18.592	0
	High	NTHETAQAIK	4	1	1	X2JIQ5		0	2.29643e+07	0	0.001985	45.35	0.000224642	2	1112.57	-0.544726	556.788	5.18213	0
	High	GLDADRLVVHHIQVNR	4	1	1	X2JIQ5		0	2511361054	0	4.405e-06	43.72	0.000539267	2	1842.01	-1.21803	921.507	50.6775	1
	High	TTQGRWPK	2	1	1	X2JIQ5		0	286203844	0	0.004453	33.11	0.0069633	2	973.521	-0.711627	487.264	12.8617	1
	High	ARGPNLR	4	1	1	X2JIQ5		0	7.44946e+07	0	0.004124	32.67	0.000675943	2	783.458	-0.180926	392.233	5.96695	1
	High	TTQGRWPKK	2	1	1	X2JIQ5		0	9379174	0.001	0.03176	7.88	3.76367	3	1101.62	0.0798195	367.877	1.37793	2
	High	EcVPFRR	1	1	1	X2JIQ5	C2(Carbamidomethyl)	0	792403517	0.002	0.05569	15.47	0.442715	3	963.484	0.632455	321.833	19.3576	1
Q9W1B9	60S ribosomal protein L12 OS=Drosophila melanogaster OX=7227 GN=RpL12 PE=1 SV=1 - [Q9W1B9_DROME]	1068.51	1774216706	27	55.15	1	8	8	165	17.6625	9.0708
	A2	Sequence	# PSMs	# Proteins	# Protein Groups	Protein Group Accessions	Modifications	ΔCn	Area	q-Value	PEP	IonScore	Exp Value	Charge	MH+ [Da]	ΔM [ppm]	m/z [Da]	RT [min]	# Missed Cleavages
	High	HSGNIGFEDILAIAR	8	1	1	Q9W1B9		0	1365816329	0	2.846e-11	108.73	1.81526e-10	2	1612.85	1.15053	806.927	47.996	0
	High	EVLGTAQSVGcTVDGK	3	1	1	Q9W1B9	C11(Carbamidomethyl)	0	673478164	0	9.144e-11	95.26	3.15723e-09	2	1620.79	0.751438	810.899	56.9933	0
	High	cVGGEVGATSSLAPK	4	1	1	Q9W1B9	C1(Carbamidomethyl)	0	686271748	0	2.806e-11	94.63	5.30299e-09	2	1432.71	-0.51449	716.858	29.1562	0
	High	HPHDVIDELNEGSIEVPAE	3	1	1	Q9W1B9		0	463479612	0	8.265e-05	66.38	2.19788e-06	2	2099.99	-0.356675	1050.5	86.8217	0
	High	KIGDDIAK	2	1	1	Q9W1B9		0	602939636	0	0.0003034	47.54	0.000295131	2	859.488	-0.308971	430.248	16.0448	1
	High	IGPLGLSPK	3	1	1	Q9W1B9		0	1752164458	0	3.154e-05	45.71	3.89375e-05	2	881.546	0.124282	441.276	32.5979	0
	High	EVLGTAQSVGcTVDGKHPHDVIDELNEGSIEVPAE	3	1	1	Q9W1B9	C11(Carbamidomethyl)	0	2204669331	0	6.732e-08	26.57	0.0344758	3	3701.76	-0.0990226	1234.59	94.1241	1
	High	ALKEPPRDR	1	1	1	Q9W1B9		0	31790505	0	0.008559	24.55	0.0264818	3	1081.61	-0.197079	361.209	7.44992	2
A0A6H2EFX8	Thioredoxin reductase-1, isoform D OS=Drosophila melanogaster OX=7227 GN=Trxr-1 PE=3 SV=1 - [A0A6H2EFX8_DROME]	2686.76	1.77035e+09	67	72.38	1	24	24	525	57.3747	6.60986
	A2	Sequence	# PSMs	# Proteins	# Protein Groups	Protein Group Accessions	Modifications	ΔCn	Area	q-Value	PEP	IonScore	Exp Value	Charge	MH+ [Da]	ΔM [ppm]	m/z [Da]	RT [min]	# Missed Cleavages
	High	YPDIPGAVEYGITSDDLFSLDREPGK	6	1	1	A0A6H2EFX8		0	1.36734e+09	0	1.892e-14	118.34	1.84659e-11	3	2854.38	-0.407077	952.131	56.6609	1
	High	NVETGEEAEDVYDTVLWAIGRK	5	1	1	A0A6H2EFX8		0	1609224064	0	5.398e-11	116.97	2.51137e-11	2	2494.21	1.28174	1247.61	122.766	1
	High	GFDQQMAELVAASMEER	2	1	1	A0A6H2EFX8		0	5.34278e+07	0	1.195e-11	114.76	1.67098e-11	2	1911.86	-0.281421	956.432	119.099	0
	High	KVEYINGLGSFVDSHTLLAK	4	1	1	A0A6H2EFX8		0	880083152	0	3.573e-14	108.15	1.42391e-10	2	2191.18	0.77882	1096.09	87.1888	1
	High	VYGLHYIGPVAGEVIQGFAAALK	4	1	1	A0A6H2EFX8		0	1681703382	0	1.623e-10	99.81	1.1283e-09	2	2373.31	4.85473	1187.16	126.45	0
	High	GLVDDLNLPNAGVTVQK	2	1	1	A0A6H2EFX8		0	777356963	0	4.784e-12	96.62	2.67858e-09	2	1752.95	0.494863	876.979	47.2184	0
	High	VAcLDFVKPTPTLGTK	4	1	1	A0A6H2EFX8	C3(Carbamidomethyl)	0	1080551432	0	1.522e-12	96.39	3.68532e-09	2	1746.95	0.288178	873.977	37.469	1
	High	LMHQASLLGEAVHEAAAYGWNVDEK	4	1	1	A0A6H2EFX8		0	2.96934e+08	0	1.714e-14	93.22	6.50328e-09	3	2739.32	0.543496	913.779	48.4541	0
	High	SGLTINTLINTVGIHPTTAEEFTR	2	1	1	A0A6H2EFX8		0	853943232	0	1.024e-11	92.04	1.03779e-08	2	2585.36	1.85765	1293.18	109.914	0
	High	TITAQTFVIAVGGRPR	4	1	1	A0A6H2EFX8		0	938480991	0	2.581e-09	84.59	2.78029e-08	2	1686.97	0.41171	843.987	39.2189	1
	High	NVETGEEAEDVYDTVLWAIGR	1	1	1	A0A6H2EFX8		0	1.24304e+08	0	8.684e-12	83.27	5.46334e-08	3	2366.12	1.49992	789.378	65.8769	0
	High	DVATTVFTPLEYAcVGLSEEDAVK	2	1	1	A0A6H2EFX8	C14(Carbamidomethyl)	0	464773374	0	1.603e-10	83.08	5.85527e-08	3	2614.26	-1.19941	872.09	63.6466	0
	High	DKIPVDSQEATNVANIYAVGDIIYGKPELTPVAVLAGR	2	1	1	A0A6H2EFX8		0	2.02011e+09	0	3.588e-15	81.19	4.71402e-08	3	3997.11	-4.12092	1333.04	126.472	2
	High	LVQSVQNHIK	4	1	1	A0A6H2EFX8		0	891348068	0	7.436e-05	70.31	6.4712e-07	2	1165.67	0.775548	583.339	18.4976	0
	High	IPVDSQEATNVANIYAVGDIIYGKPELTPVAVLAGR	1	1	1	A0A6H2EFX8		0	8.70964e+07	0	2.731e-16	63.95	2.1344e-06	4	3754.01	2.12083	939.259	61.6464	1
	High	HGDQRVYGLHYIGPVAGEVIQGFAAALK	2	1	1	A0A6H2EFX8		0	123942410	0	1.033e-12	48.25	0.000186281	4	2966.56	-1.74239	742.395	52.7186	1
	High	RLYGGSTQR	2	1	1	A0A6H2EFX8		0	5.47354e+07	0	1.417e-05	42.91	0.000585876	2	1037.55	0.0504588	519.278	7.93781	1
	High	TVPLSVEK	2	1	1	A0A6H2EFX8		0	482989132	0	0.006064	42.59	0.000570086	2	872.509	0.110482	436.758	24.2614	0
	High	GLGYEPTVMVR	1	1	1	A0A6H2EFX8		0	381120210	0	9.399e-06	40.55	0.0010925	2	1221.63	0.103993	611.319	67.9034	0
	High	RSGLDPTPASccS	2	1	1	A0A6H2EFX8	C11(Carbamidomethyl); C12(Carbamidomethyl)	0	244364792	0	1.246e-05	38.47	0.000241796	2	1407.6	0.0720822	704.303	23.1516	1
	High	QFGADEIEVFHGYYKPTEFFIPQK	4	1	1	A0A6H2EFX8		0	645353176	0	6.852e-08	24.84	0.0449491	4	2890.41	1.0388	723.358	104.686	1
	High	GLGYEPTVmVR	1	1	1	A0A6H2EFX8	M9(Oxidation)	0	8.36146e+06	0	0.0005508	21.22	0.0736215	2	1237.62	-0.621679	619.316	59.5098	0
	High	TLVVGAGYIGLEcAGFLK	1	1	1	A0A6H2EFX8	C13(Carbamidomethyl)	0	0	0	3.567e-06	14.49	0.611686	2	1868	1.09996	934.504	121.082	0
	High	IKPDWHK	3	1	1	A0A6H2EFX8		0	429333546	0.001	0.03191	30.39	0.00681014	2	923.51	0.0129113	462.259	17.025	1
	High	SVNWVTR	2	1	1	A0A6H2EFX8		0	505851328	0.002	0.07945	30.78	0.0106957	2	861.459	0.979069	431.233	39.6931	0
M9NEU5	Profilin OS=Drosophila melanogaster OX=7227 GN=chic PE=2 SV=1 - [M9NEU5_DROME]	1035.87	1.75334e+09	24	89.68	1	8	8	126	13.7148	5.41455
	A2	Sequence	# PSMs	# Proteins	# Protein Groups	Protein Group Accessions	Modifications	ΔCn	Area	q-Value	PEP	IonScore	Exp Value	Charge	MH+ [Da]	ΔM [ppm]	m/z [Da]	RT [min]	# Missed Cleavages
	High	LISGFDQQDGLTSNGVTLAGQR	3	1	1	M9NEU5		0	1.82055e+09	0	1.023e-12	173.06	7.53824e-17	2	2277.14	-2.38112	1139.07	88.7184	0
	High	AcIAGHDGNIWAQSSGFEVTK	2	1	1	M9NEU5	C2(Carbamidomethyl)	0	1590280272	0	9.489e-14	105.45	3.06484e-10	2	2248.04	-0.231297	1124.53	73.7004	0
	High	AcIAGHDGNIWAQSSGFEVTKEELSK	4	1	1	M9NEU5	C2(Carbamidomethyl)	0	2.66961e+08	0	1.998e-14	100.94	9.86589e-10	3	2834.34	0.585145	945.453	77.0281	1
	High	sWQDYVDNQLLASQcVTK	3	1	1	M9NEU5	N-Term(Acetyl); C15(Carbamidomethyl)	0	5.36895e+08	0	7.409e-09	100.24	1.00301e-09	2	2197.02	-0.037998	1099.02	126.225	0
	High	TTQAVIVSIYEDPVQPQQAASVVEK	6	1	1	M9NEU5		0	633999140	0	1.729e-10	72.81	6.75445e-07	3	2700.41	1.03655	900.809	100.11	0
	High	YIYLSGTDR	1	1	1	M9NEU5		0	1849177152	0	0.001155	55.68	2.71748e-05	2	1087.54	0.716145	544.275	30.0255	0
	High	YIYLSGTDRVVR	4	1	1	M9NEU5		0	202368994	0	0.0006326	38.01	0.00226118	2	1441.78	0.170342	721.394	30.8257	1
	High	LGDYLITcGY	1	1	1	M9NEU5	C8(Carbamidomethyl)	0	6.21798e+07	0.001	0.03461	3.95	3.32242	2	1174.55	2.12472	587.777	99.2607	0
X2J950	40S ribosomal protein S13 OS=Drosophila melanogaster OX=7227 GN=RpS13 PE=2 SV=1 - [X2J950_DROME]	607.101	1.73587e+09	32	40.4	1	8	8	151	17.1676	10.5503
	A2	Sequence	# PSMs	# Proteins	# Protein Groups	Protein Group Accessions	Modifications	ΔCn	Area	q-Value	PEP	IonScore	Exp Value	Charge	MH+ [Da]	ΔM [ppm]	m/z [Da]	RT [min]	# Missed Cleavages
	High	SVGLKPDIPEDLYHMIK	6	1	1	X2J950		0	1500081088	0	1.745e-09	62.97	7.92318e-06	2	1955.03	0.154554	978.019	44.5711	1
	High	FRLILVESR	6	1	1	X2J950		0	3.77229e+08	0	1.529e-05	58.5	4.94388e-06	2	1132.68	0.432954	566.846	36.2761	1
	High	DSHGVAQVR	2	1	1	X2J950		0	89998330	0	0.0004061	49.84	7.57396e-05	3	968.49	-1.05321	323.501	13.021	0
	High	GISQSALPYRR	4	1	1	X2J950		0	1864772019	0	0.001297	37.52	0.00244275	2	1247.68	-2.01197	624.345	23.5937	1
	High	GISQSALPYR	4	1	1	X2J950		0	1842760549	0	0.008851	23.5	0.0821898	2	1091.59	1.09711	546.296	29.0307	0
	High	SVLPPNWK	5	1	1	X2J950		0	74172850	0	0.009233	21.23	0.0632819	2	940.526	1.44017	470.767	33.0173	0
	High	LILVESR	2	1	1	X2J950		0	759669904	0.001	0.01785	54.19	2.97231e-05	2	829.514	0.204409	415.261	49.3051	0
	High	TVPSWLK	3	1	1	X2J950		0	1313636368	0.002	0.07792	35.31	0.00560912	2	830.478	0.65793	415.742	32.1341	0
X2J5G6	Ribosomal protein L7, isoform B OS=Drosophila melanogaster OX=7227 GN=RpL7 PE=3 SV=1 - [X2J5G6_DROME]	1724.85	1.73298e+09	68	61.9	1	24	24	252	29.5336	10.8872
	A2	Sequence	# PSMs	# Proteins	# Protein Groups	Protein Group Accessions	Modifications	ΔCn	Area	q-Value	PEP	IonScore	Exp Value	Charge	MH+ [Da]	ΔM [ppm]	m/z [Da]	RT [min]	# Missed Cleavages
	High	VPITDNFVIER	2	1	1	X2J5G6		0	3.4759e+08	0	5.988e-06	90.33	1.41342e-08	2	1302.71	0.247719	651.856	77.6689	0
	High	QAHQIQcVEDLVHEIFTVGPNFK	4	1	1	X2J5G6	C7(Carbamidomethyl)	0	2.44835e+08	0	6.475e-14	84.2	6.6343e-08	3	2709.34	-0.459115	903.786	56.8621	0
	High	VPITDNFVIERK	2	1	1	X2J5G6		0	662248994	0	1.919e-08	81.71	7.38608e-08	3	1430.8	1.30441	477.606	33.4134	1
	High	IAEPYITWGYPNLK	3	1	1	X2J5G6		0	1502601585	0	3.353e-09	80.04	1.29304e-07	2	1664.87	0.15411	832.938	98.9189	0
	High	LRQAHQIQcVEDLVHEIFTVGPNFK	5	1	1	X2J5G6	C9(Carbamidomethyl)	0	1648417116	0	1.283e-16	68.04	2.37125e-06	3	2978.53	-0.728133	993.514	53.3914	1
	High	KRNQFYVPAEAK	4	1	1	X2J5G6		0	6.69857e+08	0	7.867e-08	67.04	2.72822e-06	2	1450.78	1.27429	725.895	19.636	2
	High	QRVPITDNFVIERK	5	1	1	X2J5G6		0	572906979	0	2.774e-09	65.02	3.82451e-06	3	1714.96	0.62473	572.325	29.9811	2
	High	YASNFLWPFK	3	1	1	X2J5G6		0	1.71638e+09	0	8.038e-06	64.55	4.89299e-06	2	1272.64	1.01549	636.825	52.8831	0
	High	KLPAVPESK	3	1	1	X2J5G6		0	1834141868	0	9.4e-05	60.93	4.88377e-06	2	968.578	0.379069	484.793	19.5125	1
	High	RNQFYVPAEAK	4	1	1	X2J5G6		0	404372844	0	1.114e-06	59.42	1.55431e-05	2	1322.69	0.474273	661.847	24.2538	1
	High	QRVPITDNFVIER	3	1	1	X2J5G6		0	3.89517e+08	0	9.737e-08	57.31	2.72168e-05	2	1586.87	0.183175	793.936	66.2727	1
	High	LRQINNGVFIK	3	1	1	X2J5G6		0	363061928	0	7.891e-07	52.12	5.83074e-05	2	1301.77	0.71571	651.389	27.1434	1
	High	LNTPTGGWR	2	1	1	X2J5G6		0	624405028	0	0.0005623	50.89	0.000129538	2	1001.52	0.663066	501.262	27.1862	0
	High	ANHYVNGGDFGNREDQINR	5	1	1	X2J5G6		0	842004126	0	1.113e-06	50.54	6.26987e-05	2	2175.99	-0.134543	1088.5	39.8415	1
	High	YQNEYIK	2	1	1	X2J5G6		0	552675716	0	0.00308	42.64	0.000323979	2	957.47	2.74801	479.239	21.8939	0
	High	QINNGVFIK	2	1	1	X2J5G6		0	351453416	0	0.0002028	41.69	0.000796229	2	1032.58	0.793112	516.796	28.8569	0
	High	KANHYVNGGDFGNREDQINR	4	1	1	X2J5G6		0	2.66999e+08	0	5.031e-07	31.9	0.00674709	4	2304.09	0.762229	576.778	32.8565	2
	High	NQFYVPAEAK	1	1	1	X2J5G6		0	260888604	0	0.001987	25.38	0.0311464	2	1166.58	0.57698	583.796	51.8151	0
	High	LNTPTGGWRK	3	1	1	X2J5G6		0	704719056	0	0.0002016	24.36	0.0705392	2	1129.61	0.480435	565.31	31.1848	1
	High	ATINMLR	2	1	1	X2J5G6		0	4.98063e+08	0.001	0.01813	39.5	0.00157644	2	818.455	-0.251176	409.731	43.2743	0
	High	AAVIALRK	3	1	1	X2J5G6		0	6.54863e+08	0.001	0.01862	38.11	0.000509934	2	841.562	0.682336	421.285	18.8771	1
	High	AAVIALR	1	1	1	X2J5G6		0	844080120	0.002	0.05246	59.3	1.17211e-06	2	713.467	0.205026	357.237	26.2998	0
	High	SVRELIYK	1	1	1	X2J5G6		0	2.73335e+07	0.008	0.3352	21.78	0.0511082	2	1007.59	2.46891	504.299	36.2378	1
	High	KAAVIALR	1	1	1	X2J5G6		0	22666767	0.009	0.3725	10.77	0.276385	2	841.562	0.754862	421.285	19.2393	1
M9PHM6	60S ribosomal protein L18 OS=Drosophila melanogaster OX=7227 GN=RpL18 PE=3 SV=1 - [M9PHM6_DROME]	1026.27	1.73004e+09	39	54.79	1	12	12	188	21.6511	11.5317
	A2	Sequence	# PSMs	# Proteins	# Protein Groups	Protein Group Accessions	Modifications	ΔCn	Area	q-Value	PEP	IonScore	Exp Value	Charge	MH+ [Da]	ΔM [ppm]	m/z [Da]	RT [min]	# Missed Cleavages
	High	AANQPESTIVVVGTVTDDAR	10	1	1	M9PHM6		0	2.22509e+07	0	4.703e-13	123.68	6.38537e-12	2	2043.04	0.0277476	1022.02	82.7572	0
	High	AGGEVLTFDQLALR	1	1	1	M9PHM6		0	524447362	0	6.659e-08	78.26	2.08245e-07	2	1489.8	2.09655	745.406	48.3924	0
	High	AGGEVLTFDQLALRSPTGK	3	1	1	M9PHM6		0	4.14395e+08	0	3.154e-08	54.9	4.61121e-05	3	1960.05	0.549582	654.022	84.3922	1
	High	LTVcALHVTQTAR	4	1	1	M9PHM6	C4(Carbamidomethyl)	0	1873970050	0	1.093e-06	51.03	8.79579e-05	2	1469.79	1.81964	735.4	49.9479	0
	High	NTLLLQGRR	2	1	1	M9PHM6		0	373400924	0	0.000208	49.6	6.63369e-05	2	1070.64	0.380001	535.825	20.9166	1
	High	INRPPLSLQR	4	1	1	M9PHM6		0	1806723880	0	0.0004033	46.96	0.0001027	2	1193.71	1.72169	597.36	25.2798	1
	High	NTLLLQGR	2	1	1	M9PHM6		0	1509422412	0	0.0009795	46.68	0.000300696	2	914.543	1.09557	457.775	27.9199	0
	High	SQDVYLR	1	1	1	M9PHM6		0	178571012	0	0.004387	43.98	0.000461936	2	880.453	0.608917	440.73	22.4216	0
	High	GIDINHKYDRK	3	1	1	M9PHM6		0	2.70783e+07	0	0.0001249	25.57	0.0629544	3	1358.72	0.847723	453.578	15.4711	2
	High	APGVPHSHTRPYVR	6	1	1	M9PHM6		0	1364035186	0	0.0004315	21.33	0.118161	3	1573.83	-3.94387	525.281	15.8723	1
	High	GIDINHKYDR	1	1	1	M9PHM6		0	3.52547e+07	0	0.002167	21.28	0.120274	3	1230.62	-0.205339	410.879	25.5553	1
	High	GIDINHK	2	1	1	M9PHM6		0	216186794	0.001	0.03377	24.5	0.00620923	2	796.431	-0.320804	398.719	13.1289	0
Q9VLC5	Aldehyde dehydrogenase OS=Drosophila melanogaster OX=7227 GN=Aldh PE=1 SV=1 - [Q9VLC5_DROME]	1183.04	1.66842e+09	35	44.62	1	18	18	520	56.983	6.80029
	A2	Sequence	# PSMs	# Proteins	# Protein Groups	Protein Group Accessions	Modifications	ΔCn	Area	q-Value	PEP	IonScore	Exp Value	Charge	MH+ [Da]	ΔM [ppm]	m/z [Da]	RT [min]	# Missed Cleavages
	High	TVGNPFDLNTEQGPQVNEEQMEK	2	1	1	Q9VLC5		0	37945594	0	1.75e-11	110.38	6.13868e-11	2	2604.18	-1.99995	1302.6	86.4406	0
	High	IFETINPTTAEVIAEIQcADK	3	1	1	Q9VLC5	C18(Carbamidomethyl)	0	298932128	0	6.49e-12	106.59	3.70584e-10	2	2363.18	-0.11857	1182.09	119.924	0
	High	ANNSEYGLAAAVFTK	2	1	1	Q9VLC5		0	521797456	0	1.198e-08	98.24	2.67694e-09	2	1555.78	-0.0573908	778.391	42.6163	0
	High	RTVGNPFDLNTEQGPQVNEEQMEK	2	1	1	Q9VLC5		0	60850988	0	1.838e-12	85.51	1.95427e-08	3	2760.29	0.590341	920.769	73.6535	1
	High	LGPALATGNTIVLKPAEQTSLTALYIAQLVK	3	1	1	Q9VLC5		0	445533403	0	3.039e-16	82.03	6.2513e-09	3	3194.84	0.661974	1065.62	128.619	1
	High	AGTVWVNTYNVLAAQAPFGGYK	3	1	1	Q9VLC5		0	3.64014e+08	0	9.325e-14	79.53	2.2453e-07	3	2327.18	-0.289077	776.399	55.7872	0
	High	LIQLASGNTNLK	2	1	1	Q9VLC5		0	838373020	0	8.333e-07	68.72	1.74559e-06	2	1271.73	0.597802	636.37	31.9746	0
	High	EAGFPEGVVNVVPGFGTAGAALANHcDVDK	2	1	1	Q9VLC5	C26(Carbamidomethyl)	0	5.6124e+08	0	3.205e-15	68.27	1.96596e-06	3	2998.44	-0.454076	1000.15	106.868	0
	High	RVTLELGGK	2	1	1	Q9VLC5		0	702441880	0	6.402e-06	64.54	3.90232e-06	2	972.584	0.455224	486.796	22.1681	1
	High	VAFTGSTDVGK	2	1	1	Q9VLC5		0	3428477785	0	2.13e-05	63.53	5.34548e-06	2	1081.55	0.625845	541.28	25.85	0
	High	ANYIVGGLR	2	1	1	Q9VLC5		0	667731122	0	0.0008136	50.65	0.000100736	2	962.542	0.0897789	481.775	54.065	0
	High	IFETINPTTAEVIAEIQcADKEDIDIAVQAAR	1	1	1	Q9VLC5	C18(Carbamidomethyl)	0	1.1337e+08	0	4.055e-10	43.97	0.000817768	4	3544.78	-1.53129	886.95	62.3881	1
	High	KLDEVIER	2	1	1	Q9VLC5		0	738412512	0	0.0004776	42.57	0.000857693	2	1001.56	0.0283248	501.285	21.3192	1
	High	YFAGWADK	1	1	1	Q9VLC5		0	3.79385e+08	0	0.0007227	40.18	0.000460512	2	957.446	-0.968265	479.226	55.8482	0
	High	LGPALATGNTIVLK	2	1	1	Q9VLC5		0	70837608	0	8.563e-09	38.43	0.000495244	2	1367.83	-0.193188	684.416	78.4319	0
	High	TIPMDGDFFTYTR	1	1	1	Q9VLC5		0	2.00062e+07	0	4.341e-06	35.32	0.0022473	2	1563.71	-0.533629	782.361	97.6403	0
	High	IYDEFVER	2	1	1	Q9VLC5		0	565445024	0	0.005324	35.22	0.00181868	2	1070.52	1.33574	535.762	32.7993	0
	High	KLDEVIERANNSEYGLAAAVFTK	1	1	1	Q9VLC5		0	4.37367e+07	0	4.195e-06	3.11	8.33152	3	2538.32	-0.401233	846.778	89.7353	2
Q9VVU2	GEO07453p1 OS=Drosophila melanogaster OX=7227 GN=RpL26 PE=1 SV=1 - [Q9VVU2_DROME]	904.569	1.66766e+09	45	66.44	2	15	15	149	17.2705	10.9458
	A2	Sequence	# PSMs	# Proteins	# Protein Groups	Protein Group Accessions	Modifications	ΔCn	Area	q-Value	PEP	IonScore	Exp Value	Charge	MH+ [Da]	ΔM [ppm]	m/z [Da]	RT [min]	# Missed Cleavages
	High	RHFQAPSHIR	7	1	1	Q9VVU2		0	2785415896	0	2.938e-06	69.2	1.88154e-06	4	1248.67	-0.857544	312.923	13.5444	1
	High	IQRENANGTNVYVGIHPSK	4	1	1	Q9VVU2		0	1250510648	0	8.517e-08	64.78	5.73838e-06	3	2097.08	-0.348773	699.699	38.1318	1
	High	ENANGTNVYVGIHPSK	2	1	1	Q9VVU2		0	2.46594e+08	0	5.156e-08	58.9	1.67472e-05	3	1699.85	4.16313	567.287	42.6518	0
	High	KFVVYVEK	4	1	1	Q9VVU2		0	967066658	0	0.000223	53.35	3.37538e-05	2	1011.59	1.39525	506.298	24.1475	1
	High	HFQAPSHIR	1	1	1	Q9VVU2		0	117119709	0	4.098e-06	49.34	0.000176365	3	1092.57	1.11317	364.862	16.5827	0
	High	DDEVQVIR	2	1	1	Q9VVU2		0	116682358	0	0.0003358	47.76	0.00022528	2	973.497	1.84942	487.252	28.0754	0
	High	GRLAALGK	1	1	1	Q9VVU2		0	7.92418e+08	0	0.007925	43.7	0.000134373	2	785.499	-0.462597	393.253	19.613	1
	High	QNPFVSSSR	1	1	1	Q9VVU2		0	571843008	0	0.0001819	41.5	0.00100174	2	1021.51	0.995991	511.257	22.3226	0
	High	GKYTEETAAQPMETA	2	1	1	Q9VVU2		0	1.3747e+08	0	8.592e-05	39.87	0.000484281	2	1626.73	0.127754	813.87	26.6148	1
	High	LMSAPLSK	1	2	1	Q9VVU2		0	123618956	0	0.001738	35.77	0.00480703	2	846.476	0.923301	423.742	39.8506	0
	High	SMPIRRDDEVQVIR	5	1	1	Q9VVU2		0	753853708	0	0.0006536	34.41	0.0062668	2	1713.91	0.629598	857.457	44.36	2
	High	VVQAYRK	2	1	1	Q9VVU2		0	4.83113e+07	0	0.001207	34.21	0.00220003	2	863.51	-0.0452935	432.259	0.424245	1
	High	FVVYVEK	2	1	1	Q9VVU2		0	621044080	0	0.006359	29.87	0.00767638	2	883.493	0.145983	442.25	30.5491	0
	High	RHFQAPSHIRR	7	1	1	Q9VVU2		0	5.30611e+07	0	4.003e-05	24.57	0.0485305	4	1404.77	0.247921	351.949	11.6686	2
	High	SmPIRRDDEVQVIR	1	1	1	Q9VVU2	M2(Oxidation)	0	38171797	0	0.001274	21.26	0.118585	4	1729.9	-0.333365	433.231	35.4008	2
	High	GKYTEETAAQPmETA	2	1	1	Q9VVU2	M12(Oxidation)	0	93685493	0.001	0.01576	56.39	9.64382e-06	2	1642.73	-0.121957	821.867	35.3018	1
	High	RDDEVQVIR	1	1	1	Q9VVU2		0	22911472	0.005	0.2068	6.57	3.54671	3	1129.6	2.62206	377.205	30.9078	1
Q7KM15	Transcription factor BTF3 OS=Drosophila melanogaster OX=7227 GN=bic PE=1 SV=1 - [Q7KM15_DROME]	2189.66	1.666e+09	89	62.13	1	13	14	169	17.7273	7.48877
	A2	Sequence	# PSMs	# Proteins	# Protein Groups	Protein Group Accessions	Modifications	ΔCn	Area	q-Value	PEP	IonScore	Exp Value	Charge	MH+ [Da]	ΔM [ppm]	m/z [Da]	RT [min]	# Missed Cleavages
	High	AQASLPTNTFAITGHGENK	4	1	1	Q7KM15		0	2314402952	0	3.194e-12	151.44	1.21307e-14	2	1956.98	-0.871597	978.992	32.3967	0
	High	KLSVNTIPGIEEVNIIK	4	1	1	Q7KM15		0	1204217526	0	7.22e-15	112.98	1.4098e-11	2	1867.09	-0.571217	934.048	44.6539	1
	High	NDGTVIHFNNPK	4	1	1	Q7KM15		0	1447981952	0	1.917e-08	76.91	2.91297e-07	2	1355.67	0.843138	678.339	24.835	0
	High	KLATEIASK	2	1	1	Q7KM15		0	4.87317e+08	0	4.408e-05	75.86	2.15317e-07	2	960.574	1.10624	480.79	15.9344	1
	High	KIVHSTPATDDK	3	1	1	Q7KM15		0	8.47209e+07	0	2.797e-08	72.58	6.07285e-07	3	1311.69	-0.131219	437.902	8.5954	1
	High	TITEMVPGILTQLGPQDINQLKK	2	1	1	Q7KM15		0	1.47895e+08	0	4.314e-13	65.57	2.01066e-06	3	2537.4	0.0685067	846.472	53.4995	1
	High	TITEMVPGILTQLGPQDINQLK	4	1	1	Q7KM15		0	5.3224e+08	0	9.514e-12	62.38	5.54972e-06	3	2409.31	1.38918	803.775	59.8051	0
	High	IVHSTPATDDKK	4	1	1	Q7KM15		0	7.63379e+07	0	5.17e-08	59.01	1.36907e-05	3	1311.69	-0.480207	437.901	7.28199	1
	High	KLQSSLK	3	2	2	Q9VPR2;Q7KM15		0	9.80918e+07	0	0.0008592	52.17	2.45728e-05	2	803.498	-0.277145	402.253	1.64242	1
	High	LSVNTIPGIEEVNIIK	4	1	1	Q7KM15		0	1235619832	0	3.204e-07	51.37	3.68376e-05	2	1738.99	-0.122326	870.001	51.2436	0
	High	KLQAQVR	40	1	1	Q7KM15		0	5.98005e+07	0	0.002816	51.23	5.34882e-05	2	842.521	0.333947	421.764	6.59363	1
	High	IVHSTPATDDK	3	1	1	Q7KM15		0	8.66769e+07	0	1.82e-06	47.77	0.000128674	2	1183.59	-1.34649	592.301	13.2287	0
	High	KIVHSTPATDDKK	10	1	1	Q7KM15		0	2.31131e+07	0	4.908e-05	47.18	0.000251725	4	1439.78	-0.700686	360.702	0.67298	2
	High	LATEIASK	1	1	1	Q7KM15		0	329803192	0	0.001696	46.78	0.00027811	2	832.478	0.982348	416.743	19.6617	0
	High	TITEmVPGILTQLGPQDINQLK	1	1	1	Q7KM15	M5(Oxidation)	0	0	0	5.104e-05	13.29	0.600081	3	2425.3	0.809065	809.106	115.299	0
X2JEM4	40S ribosomal protein S28 OS=Drosophila melanogaster OX=7227 GN=RpS28b PE=2 SV=1 - [X2JEM4_DROME]	456.647	1.6399e+09	27	81.54	1	8	8	65	7.47205	10.3745
	A2	Sequence	# PSMs	# Proteins	# Protein Groups	Protein Group Accessions	Modifications	ΔCn	Area	q-Value	PEP	IonScore	Exp Value	Charge	MH+ [Da]	ΔM [ppm]	m/z [Da]	RT [min]	# Missed Cleavages
	High	GPVREGDILTLLESEREAR	5	1	1	X2JEM4		0	2.28844e+09	0	1.33e-10	58.14	2.38633e-05	3	2140.14	0.934145	714.051	42.958	2
	High	mDKPVVWAR	2	1	1	X2JEM4	N-Term(Acetyl)	0	602647858	0	2.718e-05	52.98	5.43781e-05	2	1143.6	0.277982	572.303	37.0187	1
	High	TGSQGQcTQVK	1	1	1	X2JEM4	C7(Carbamidomethyl)	0	487838	0	9.193e-07	52.69	4.1985e-05	2	1193.56	-0.345676	597.282	5.96669	0
	High	mDKPVVWAR	2	1	1	X2JEM4	N-Term(Acetyl); M1(Oxidation)	0	798613194	0	2.446e-05	50.43	0.000258587	2	1159.59	0.237969	580.3	30.7527	1
	High	GPVREGDILTLLESER	3	1	1	X2JEM4		0	545555862	0	6.578e-08	44.74	0.000488498	3	1783.95	0.0218094	595.323	47.3852	1
	High	EGDILTLLESEREAR	3	1	1	X2JEM4		0	118987074	0	5.565e-07	41.41	0.00115643	3	1730.89	-0.0406781	577.635	46.4722	1
	High	VEFLGEQNR	8	1	1	X2JEM4		0	1832639164	0	0.002864	39.83	0.00141949	2	1091.55	0.755279	546.278	29.3281	0
	High	GPVREGDILTLLESEREARR	2	1	1	X2JEM4		0	268440804	0	2.107e-05	20.95	0.0899949	4	2296.24	0.339819	574.815	39.1604	3
	High	VEFLGEQNRQIIR	1	1	1	X2JEM4		0	7.85037e+07	0	0.008569	7.99	2.42253	3	1601.88	0.0745469	534.63	59.6003	1
Q7K2I4	Peptidyl-prolyl cis-trans isomerase OS=Drosophila melanogaster OX=7227 GN=Dmel\CG7768 PE=2 SV=1 - [Q7K2I4_DROME]	350.218	1.62487e+09	15	20.73	1	3	4	164	17.7598	8.14795
	A2	Sequence	# PSMs	# Proteins	# Protein Groups	Protein Group Accessions	Modifications	ΔCn	Area	q-Value	PEP	IonScore	Exp Value	Charge	MH+ [Da]	ΔM [ppm]	m/z [Da]	RT [min]	# Missed Cleavages
	High	SIYGNKFPDENFELK	3	1	1	Q7K2I4		0	2840308540	0	2.234e-09	73.27	7.44144e-07	2	1800.88	0.0996528	900.944	38.7004	1
	High	FPDENFELK	7	1	1	Q7K2I4		0	1477468724	0	7.12e-05	70.93	6.82114e-07	2	1138.54	0.518695	569.775	73.7433	0
	High	ALcTGEK	2	2	2	Q9VAW1;Q7K2I4	C3(Carbamidomethyl)	0	3.00921e+07	0	0.00606	21.83	0.0259177	2	778.377	0.216062	389.692	4.14439	0
	High	IVMELRSDVVPK	3	1	1	Q7K2I4		0	556836140	0	0.00118	18.4	0.213202	2	1385.78	0.683623	693.395	33.982	1
A0A0B4LFZ4	Vesicle-fusing ATPase OS=Drosophila melanogaster OX=7227 GN=TER94 PE=1 SV=1 - [A0A0B4LFZ4_DROME]	4050.3	1.61739e+09	125	72.12	1	48	48	825	91.8657	5.37646
	A2	Sequence	# PSMs	# Proteins	# Protein Groups	Protein Group Accessions	Modifications	ΔCn	Area	q-Value	PEP	IonScore	Exp Value	Charge	MH+ [Da]	ΔM [ppm]	m/z [Da]	RT [min]	# Missed Cleavages
	High	LIVEEAQNDDNSVVSLSQAK	4	1	1	A0A0B4LFZ4		0	397565460	0	3.232e-12	148.41	2.50207e-14	2	2159.08	-0.641418	1080.04	78.3765	0
	High	VTQGFSGADLTEIcQR	7	1	1	A0A0B4LFZ4	C14(Carbamidomethyl)	0	8.7787e+08	0	5.276e-12	109.84	8.50773e-11	2	1781.85	0.30051	891.428	39.5853	0
	High	DRPNRLIVEEAQNDDNSVVSLSQAK	4	1	1	A0A0B4LFZ4		0	668446114	0	1.774e-14	101.61	1.20102e-09	3	2797.41	0.940204	933.142	36.3282	2
	High	AIANEcQANFISVK	3	1	1	A0A0B4LFZ4	C6(Carbamidomethyl)	0	1.14253e+09	0	5.64e-08	96.46	3.2084e-09	2	1564.78	-0.636301	782.893	64.3011	0
	High	YEMFAQTLQQSR	2	1	1	A0A0B4LFZ4		0	265419316	0	3.44e-08	92.12	4.69528e-09	2	1501.71	1.50014	751.36	37.3237	0
	High	NSPAIIFIDEIDAIAPK	6	1	1	A0A0B4LFZ4		0	1699703338	0	1.454e-09	90.39	1.0558e-08	3	1826.99	-0.52245	609.668	63.925	0
	High	ETVVEVPNTTWTDIGGLESVK	2	1	1	A0A0B4LFZ4		0	4.57297e+07	0	1.926e-11	89.8	1.96337e-08	2	2274.15	1.4408	1137.58	108.939	0
	High	SAAPcVLFFDELDSIAK	4	1	1	A0A0B4LFZ4	C5(Carbamidomethyl)	0	1236264190	0	2.392e-11	89.55	1.31437e-08	2	1882.93	0.302593	941.967	62.2773	0
	High	IVSQLLTLMDGMK	2	1	1	A0A0B4LFZ4		0	121384887	0	2.341e-07	82.34	8.69333e-08	2	1448.79	0.577753	724.897	55.2767	0
	High	VVLTDPEPYcIVAPETVIFcDGDPIK	2	1	1	A0A0B4LFZ4	C10(Carbamidomethyl); C20(Carbamidomethyl)	0	117770342	0	3.472e-11	81.1	1.35843e-07	3	2947.44	-1.62429	983.152	128.653	0
	High	SSPSALRETVVEVPNTTWTDIGGLESVK	3	1	1	A0A0B4LFZ4		0	319938250	0	3.842e-12	77.73	3.0105e-07	2	2972.52	0.419588	1486.76	103.162	1
	High	LHDDVDLEQIAAESHGHVGADLASLcSEAALQQIR	2	1	1	A0A0B4LFZ4	C26(Carbamidomethyl)	0	434929069	0	1.099e-12	77.19	2.38732e-07	3	3768.84	2.79528	1256.95	100.67	0
	High	AVANETGAFFFLINGPEIMSK	2	1	1	A0A0B4LFZ4		0	153481355	0	5.677e-10	75.2	5.9946e-07	3	2256.14	-0.0466692	752.717	62.959	0
	High	ARGGNVGDAGGAADRVINQILTEMDGMGAK	1	1	1	A0A0B4LFZ4		0	7.6365e+07	0	1.442e-12	70.42	1.07123e-06	4	2944.44	0.947705	736.865	115.227	2
	High	SSPSALRETVVEVPNTTWTDIGGLESVKK	3	1	1	A0A0B4LFZ4		0	1.67036e+09	0	1.808e-13	70.02	1.30896e-06	3	3100.61	-3.36167	1034.21	92.3157	2
	High	MDELQLFRGDTVILK	3	1	1	A0A0B4LFZ4		0	3.92091e+08	0	1.438e-08	69.55	1.66376e-06	2	1777.96	3.87212	889.483	47.8743	1
	High	ETVcIVLSDDTcPDEK	7	1	1	A0A0B4LFZ4	C4(Carbamidomethyl); C12(Carbamidomethyl)	0	1.24728e+07	0	4.821e-07	65.04	1.39431e-06	2	1880.83	1.58726	940.918	82.5363	0
	High	LDQLIYIPLPDDK	1	1	1	A0A0B4LFZ4		0	1.31946e+08	0	4.112e-09	61.83	9.08761e-06	2	1542.84	1.12516	771.925	53.6978	0
	High	LAGESESNLRK	4	1	1	A0A0B4LFZ4		0	6.93271e+08	0	7.308e-07	61.08	1.27112e-05	2	1203.63	-0.0941081	602.32	16.1503	1
	High	ETVVEVPNTTWTDIGGLESVKK	2	1	1	A0A0B4LFZ4		0	5.57855e+08	0	1.47e-09	60.82	1.60207e-05	3	2402.24	-0.165779	801.42	94.4036	1
	High	REEEEESLNAVGYDDIGGcRK	1	1	1	A0A0B4LFZ4	C19(Carbamidomethyl)	0	2.24123e+07	0	1.951e-12	60.35	5.07414e-06	3	2426.09	0.397198	809.368	54.2255	2
	High	EVDLTYIAK	2	1	1	A0A0B4LFZ4		0	1207990808	0	0.000283	52.9	5.25683e-05	2	1051.57	0.486114	526.287	36.5331	0
	High	ELQELVQYPVEHPDK	3	1	1	A0A0B4LFZ4		0	1308088728	0	2.429e-08	52.42	8.5633e-05	2	1823.92	-1.2405	912.461	36.1717	0
	High	GILMYGPPGTGK	2	1	1	A0A0B4LFZ4		0	508138992	0	1.653e-06	51.52	0.000111694	2	1190.62	-0.75498	595.815	67.3701	0
	High	RSVSDNDIRK	2	1	1	A0A0B4LFZ4		0	85291979	0	7.709e-07	50.39	0.000188307	3	1189.63	0.0688082	397.214	7.704	2
	High	EIDIGIPDATGRLEVLR	4	1	1	A0A0B4LFZ4		0	371897150	0	2.444e-06	49.83	8.57934e-05	2	1867.03	-0.573077	934.017	48.5592	1
	High	GVLFYGPPGcGK	2	1	1	A0A0B4LFZ4	C10(Carbamidomethyl)	0	1482097848	0	4.804e-06	48.82	0.000131876	2	1251.62	1.03356	626.314	67.5524	0
	High	SVSDNDIRK	2	1	1	A0A0B4LFZ4		0	1.90105e+07	0	0.0001188	44.98	0.000433643	2	1033.53	-0.0406584	517.267	12.4124	1
	High	EMVELPLRHPSLFK	3	1	1	A0A0B4LFZ4		0	506357584	0	1.386e-07	43.95	0.000509437	3	1695.93	0.781572	565.98	38.3099	1
	High	GPELLTmWFGESEANVRDIFDK	1	1	1	A0A0B4LFZ4	M7(Oxidation)	0	328454469	0	8.102e-10	41.94	0.00105236	3	2570.23	1.61264	857.414	61.684	1
	High	YEmFAQTLQQSR	2	1	1	A0A0B4LFZ4	M3(Oxidation)	0	36858795	0	1.749e-06	38.77	0.00118802	2	1517.71	2.34143	759.358	55.9495	0
	High	IVSQLLTLMDGMKK	1	1	1	A0A0B4LFZ4		0	6.52227e+07	0	5.946e-07	38.28	0.00176826	3	1576.88	-0.0578545	526.298	95.7111	1
	High	AIGVKPPR	2	1	1	A0A0B4LFZ4		0	303742496	0	0.0008409	38.12	0.000153805	2	837.531	0.74532	419.269	17.4016	1
	High	FGMQPSR	2	1	1	A0A0B4LFZ4		0	85172960	0	0.001675	37.43	0.000759013	2	822.392	-0.351027	411.7	30.8735	0
	High	MDELQLFR	2	1	1	A0A0B4LFZ4		0	7.31481e+07	0	0.000302	36.91	0.00412501	2	1051.52	0.0629758	526.266	82.5936	0
	High	PYFLEAYRPIHMGDNFIVR	4	1	1	A0A0B4LFZ4		0	941079707	0	7.081e-10	36.39	0.0033983	4	2338.18	0.985604	585.301	46.4126	1
	High	QAIEAEIRR	2	1	1	A0A0B4LFZ4		0	467990619	0	0.001522	30.84	0.0077469	3	1085.61	0.219384	362.54	20.5447	1
	High	ARSAAPcVLFFDELDSIAK	1	1	1	A0A0B4LFZ4	C7(Carbamidomethyl)	0	1.43469e+07	0	5.081e-08	30.29	0.0164164	3	2110.06	-1.67219	704.025	112.338	1
	High	GFGQNFRFPGQTGNTSGSGNNLPVNSPGDNGDDDLYS	2	1	1	A0A0B4LFZ4		0	3.75367e+08	0	2.96e-05	30.21	0.00176267	4	3802.67	2.59643	951.423	101.988	1
	High	FGRFDREIDIGIPDATGR	3	1	1	A0A0B4LFZ4		0	86890788	0	9.528e-07	26.67	0.0432709	3	2035.03	-0.751091	679.016	79.4735	2
	High	NSPAIIFIDEIDAIAPKR	1	1	1	A0A0B4LFZ4		0	0	0	3.962e-08	26.34	0.0247371	3	1983.09	0.788256	661.702	117.501	1
	High	NSPAIIFIDEIDAIAPKRDK	2	1	1	A0A0B4LFZ4		0	72042652	0	2.174e-07	25.13	0.0368283	4	2226.2	-3.81493	557.307	51.7948	2
	High	KYEMFAQTLQQSR	1	1	1	A0A0B4LFZ4		0	64815527	0	1.531e-05	21.47	0.0741367	3	1629.8	-2.55777	543.939	56.9582	1
	High	FGRFDREIDIGIPDATGRLEVLR	2	1	1	A0A0B4LFZ4		0	1147107086	0	3.338e-05	19.73	0.0904522	3	2645.42	0.0334455	882.477	93.062	3
	High	SSHLIVMAATNRPNSIDPALRR	4	1	1	A0A0B4LFZ4		0	558829452	0	3.67e-06	13.73	0.563445	3	2419.3	-0.475231	807.104	56.1858	2
	High	NVFIIGATNRPDIIDPAILRPGRLDQLIYIPLPDDK	2	1	1	A0A0B4LFZ4		0	1148964794	0	2.303e-06	6.03	0.33677	3	4042.25	-0.514551	1348.09	129.239	3
	High	AAMRPIEFK	1	1	1	A0A0B4LFZ4		0	354326782	0	0.001392	4.9	5.0966	3	1062.58	1.4171	354.864	24.7969	1
	High	AAmRPIEFK	3	1	1	A0A0B4LFZ4	M3(Oxidation)	0	290336961	0.001	0.02468	36.43	0.00313963	2	1078.57	0.351059	539.79	19.7373	1
	High	SREAILK	1	1	1	A0A0B4LFZ4		0	411636457	0.004	0.1538	38.9	0.00177778	2	816.494	-0.0738797	408.751	12.5263	1
	High	GFGQNFR	1	1	1	A0A0B4LFZ4		0	176985624	0.008	0.3217	38.01	0.000434843	2	825.401	0.596195	413.204	36.0393	0
Q9VHE5	60S ribosomal protein L34 OS=Drosophila melanogaster OX=7227 GN=RpL34b PE=1 SV=1 - [Q9VHE5_DROME]	421.833	1.60312e+09	25	39.29	1	1	10	168	18.4195	11.5171
	A2	Sequence	# PSMs	# Proteins	# Protein Groups	Protein Group Accessions	Modifications	ΔCn	Area	q-Value	PEP	IonScore	Exp Value	Charge	MH+ [Da]	ΔM [ppm]	m/z [Da]	RT [min]	# Missed Cleavages
	High	TYGGVLcHScLR	5	2	2	Q9VBH8;Q9VHE5	C7(Carbamidomethyl); C10(Carbamidomethyl)	0	1851031434	0	3.222e-08	79.25	9.50802e-08	2	1422.66	1.08691	711.835	25.7709	0
	High	EALVKPVK	2	2	2	Q9VBH8;Q9VHE5		0	335541300	0	0.0002332	53.03	1.26923e-05	2	883.562	0.993725	442.285	16.9784	1
	High	RLSYNTR	2	2	2	Q9VBH8;Q9VHE5		0	2.50828e+08	0	0.0002588	42.44	0.000464684	2	909.49	-0.147887	455.249	12.0509	1
	High	AFLIEEQK	2	2	2	Q9VBH8;Q9VHE5		0	1.80751e+09	0	0.003566	39.07	0.00155469	2	977.531	0.800136	489.269	30.86	0
	High	SQREALVKPVK	5	2	2	Q9VBH8;Q9VHE5		0	364736511	0	4.145e-08	35.37	0.00191665	3	1254.75	0.212124	418.923	14.7946	2
	High	SQREALVK	1	2	2	Q9VBH8;Q9VHE5		0	3.00974e+07	0	0.001527	33.63	0.00890865	2	930.537	-0.088774	465.772	7.61188	1
	High	KNPTVPR	1	2	2	Q9VBH8;Q9VHE5		0	9.6824e+07	0	0.006242	33.34	0.00164524	2	811.478	-0.149335	406.243	7.66329	1
	High	LVYQYVK	2	2	2	Q9VBH8;Q9VHE5		0	663051168	0	0.00816	26.97	0.0152691	2	912.519	0.431123	456.763	27.3343	0
	High	GITPSRPSERPR	4	1	1	Q9VHE5		0	1.15083e+09	0	0.002571	14.01	0.492518	3	1352.74	0.89664	451.585	15.7631	2
	High	TYGGVLcHScLRER	1	2	2	Q9VBH8;Q9VHE5	C7(Carbamidomethyl); C10(Carbamidomethyl)	0	2.81676e+07	0	0.000639	11.86	0.840601	3	1707.81	2.37327	569.941	37.4315	1
CON_00703110.1	(Bos taurus) Gene_Symbol=YWHAZ 14-3-3 protein zeta/delta - [SWISS-PROT:P63103|ENSEMBL:ENSBTAP00000000289|REFSEQ:NP_777239]	185.054	1.59411e+09	11	15.1	1	1	4	245	27.7277	4.79248
	A2	Sequence	# PSMs	# Proteins	# Protein Groups	Protein Group Accessions	Modifications	ΔCn	Area	q-Value	PEP	IonScore	Exp Value	Charge	MH+ [Da]	ΔM [ppm]	m/z [Da]	RT [min]	# Missed Cleavages
	High	NLLSVAYK	2	5	3	A0A0B4KEH0;CON_00696435.1;CON_00703110.1		0	3404012112	0	0.0004714	58.1	7.82152e-06	2	907.525	0.196846	454.266	59.3895	0
	High	DSTLIMQLLR	3	5	3	A0A0B4KEH0;CON_00696435.1;CON_00703110.1		0	1.05876e+09	0	2.538e-05	55.59	4.14087e-05	2	1189.66	1.19346	595.335	56.1169	0
	High	DSTLImQLLR	2	5	3	A0A0B4KEH0;CON_00696435.1;CON_00703110.1	M6(Oxidation)	0	22653930	0	0.0001271	38.31	0.00219142	2	1205.66	-0.274642	603.331	52.1867	0
	High	MKGDYYR	1	2	2	CON_00703110.1;A0A0B4KEH0		0	5.69506e+06	0	0.002308	13.34	0.296606	2	932.43	0.719673	466.719	15.7391	1
	High	DIcNDVLSLLEK	3	1	1	CON_00703110.1	C3(Carbamidomethyl)	0	319554844	0.002	0.0788	3.71	6.87341	2	1418.72	0.0188839	709.863	61.5018	0
Q9VU35	RH34413p OS=Drosophila melanogaster OX=7227 GN=Dmel\CG11267 PE=1 SV=1 - [Q9VU35_DROME]	654.919	1.52969e+09	28	77.67	1	10	11	103	11.0092	9.08545
	A2	Sequence	# PSMs	# Proteins	# Protein Groups	Protein Group Accessions	Modifications	ΔCn	Area	q-Value	PEP	IonScore	Exp Value	Charge	MH+ [Da]	ΔM [ppm]	m/z [Da]	RT [min]	# Missed Cleavages
	High	NASTGNHIPIGVK	4	1	1	Q9VU35		0	1513538708	0	3.653e-08	93.13	8.07436e-09	2	1307.71	0.117311	654.357	22.219	0
	High	VLEGTVLAVGPGTR	3	1	1	Q9VU35		0	2.35876e+09	0	1.305e-06	87.3	1.08932e-08	2	1368.78	0.158051	684.896	38.582	0
	High	VLLPEFGGTK	2	1	1	Q9VU35		0	4.53789e+08	0	4.253e-05	53.72	7.32469e-05	2	1060.6	-0.0905201	530.805	39.1173	0
	High	EGDRVLLPEFGGTK	3	1	1	Q9VU35		0	2.0454e+08	0	3.412e-07	50.75	0.000153555	2	1517.8	-0.144555	759.401	67.7278	1
	High	GGIVLPEK	1	1	1	Q9VU35		0	716775964	0	0.001047	50.4	1.96082e-05	2	812.488	0.721873	406.748	26.6966	0
	High	ELFLFRESDILAK	4	1	1	Q9VU35		0	304545928	0	7.099e-08	47.86	0.000170229	2	1580.87	0.45219	790.938	48.2183	1
	High	ESDILAKLE	2	2	2	Q9VFN5;Q9VU35		0	263148868	0	4.594e-05	36.22	0.00442939	2	1017.55	0.171051	509.277	39.2164	1
	High	VNLEGDQK	2	1	1	Q9VU35		0	55655787	0	0.002612	32.96	0.00440067	2	902.457	-1.10431	451.732	20.8589	0
	High	ELFLFRESDILAKLE	3	1	1	Q9VU35		0	7.68247e+07	0	0.0002459	27.08	0.0183152	2	1823	1.35097	912.002	119.425	2
	High	KIIPMLDR	2	1	1	Q9VU35		0	104843448	0	0.0004243	25.26	0.0408057	2	985.586	-0.0720642	493.297	29.6771	1
	High	IIPMLDR	2	1	1	Q9VU35		0	221744702	0.001	0.04181	41.96	0.0010125	2	857.492	0.984031	429.25	35.9179	0
A8Y560	Ribosomal protein L15 OS=Drosophila melanogaster OX=7227 GN=RpL15 PE=1 SV=2 - [A8Y560_DROME]	1039.29	1.50692e+09	41	43.14	1	15	15	204	24.3102	11.4731
	A2	Sequence	# PSMs	# Proteins	# Protein Groups	Protein Group Accessions	Modifications	ΔCn	Area	q-Value	PEP	IonScore	Exp Value	Charge	MH+ [Da]	ΔM [ppm]	m/z [Da]	RT [min]	# Missed Cleavages
	High	VLNSYWIAQDASYK	5	1	1	A8Y560		0	1.95808e+09	0	9.672e-10	107.55	2.21498e-10	2	1657.82	0.428396	829.415	41.7052	0
	High	PYRGLQSIAEER	4	1	1	A8Y560		0	1394149400	0	1.702e-08	67.36	3.46187e-06	2	1418.74	0.332719	709.873	26.5644	1
	High	SHGVNQLKPYR	4	1	1	A8Y560		0	796550251	0	2.151e-07	62.3	7.06612e-06	3	1298.7	0.66873	433.571	16.1464	1
	High	YFEVILIDTHHSAIR	7	1	1	A8Y560		0	488427376	0	3.045e-08	60.04	1.74882e-05	3	1813.96	0.183441	605.325	39.7471	0
	High	GLQSIAEER	2	1	1	A8Y560		0	1168537056	0	0.001321	56.74	2.53144e-05	2	1002.52	0.335005	501.765	25.2824	0
	High	SHGVNQLK	4	1	1	A8Y560		0	9.07795e+07	0	0.0009987	49.93	9.4003e-05	2	882.479	-0.192407	441.743	3.35127	0
	High	QGFVIYR	1	1	1	A8Y560		0	205094004	0	0.007578	45.69	0.000260332	2	882.484	0.71614	441.746	31.8232	0
	High	YSQTIGGSR	1	1	1	A8Y560		0	26743201	0	0.003955	38.16	0.00133662	2	968.481	1.06055	484.744	17.3515	0
	High	YMQELYR	2	1	1	A8Y560		0	337650136	0	0.003361	37.44	0.000748252	2	1002.47	0.862136	501.74	27.9108	0
	High	YSQTIGGSRR	2	1	1	A8Y560		0	1.80039e+08	0	0.00152	34.11	0.00483247	2	1124.58	-1.40687	562.793	13.181	1
	High	YMQELYRK	3	1	1	A8Y560		0	266428781	0	0.0004045	34.04	0.00404319	2	1130.56	-1.93424	565.786	21.6692	1
	High	GYRYSQTIGGSR	1	1	1	A8Y560		0	87742741	0	0.0002764	30.46	0.00688116	3	1344.67	-0.106279	448.893	29.6324	1
	High	GYRYSQTIGGSRR	1	1	1	A8Y560		0	8.76357e+07	0	0.0004345	10.73	1.25947	3	1500.77	-0.00372154	500.927	22.6024	2
	High	YFEVILIDTHHSAIRRDPK	1	1	1	A8Y560		0	329690000	0	5.173e-05	8.3	1.59744	4	2310.24	0.775688	578.315	32.2881	2
	High	IRVWQYR	3	1	1	A8Y560		0	672377648	0.001	0.02247	30.57	0.0123219	3	1020.57	0.75132	340.863	25.8043	1
O97428	Ciboulot, isoform A OS=Drosophila melanogaster OX=7227 GN=cib PE=1 SV=1 - [O97428_DROME]	495.778	1.50418e+09	15	54.26	2	7	7	129	14.4015	5.21143
	A2	Sequence	# PSMs	# Proteins	# Protein Groups	Protein Group Accessions	Modifications	ΔCn	Area	q-Value	PEP	IonScore	Exp Value	Charge	MH+ [Da]	ΔM [ppm]	m/z [Da]	RT [min]	# Missed Cleavages
	High	IILPTAEDVAAEK	3	2	1	O97428		0	2461678910	0	2.322e-07	81.16	7.88565e-08	2	1369.76	2.38466	685.384	38.8002	0
	High	TQQSIFEGITAFNQNNLK	2	2	1	O97428		0	8.53692e+08	0	5.922e-09	70.48	1.2177e-06	2	2053.04	1.7781	1027.02	98.8243	0
	High	NQFIAGIENFDAK	4	1	1	O97428		0	1197166844	0	2.13e-07	62.93	8.73502e-06	2	1466.73	-0.600794	733.867	43.5898	0
	High	NQFIAGIENFDAKK	2	1	1	O97428		0	432619520	0	2.645e-08	56.61	3.45963e-05	3	1594.82	1.12339	532.28	37.2047	1
	High	SQLEGFNQDK	2	2	1	O97428		0	720780813	0	0.0017	40.67	0.000878464	2	1165.55	0.89638	583.278	23.9633	0
	High	aAPAPALK	1	2	1	O97428	N-Term(Acetyl)	0	7.02416e+07	0	0.002639	29.06	0.0014279	2	780.462	1.10393	390.735	50.939	0
	High	EAIEQEK	1	1	1	O97428		0	1.56412e+06	0.001	0.02337	15.79	0.125226	2	846.42	-0.053892	423.714	9.17638	0
A0A0B4LGZ5	Ribosomal protein L11, isoform B OS=Drosophila melanogaster OX=7227 GN=RpL11 PE=1 SV=1 - [A0A0B4LGZ5_DROME]	624.353	1.50221e+09	32	71.2	1	14	14	184	21.0992	10.0229
	A2	Sequence	# PSMs	# Proteins	# Protein Groups	Protein Group Accessions	Modifications	ΔCn	Area	q-Value	PEP	IonScore	Exp Value	Charge	MH+ [Da]	ΔM [ppm]	m/z [Da]	RT [min]	# Missed Cleavages
	High	VLEQLTGQQPVFSK	3	1	1	A0A0B4LGZ5		0	2.31931e+09	0	6.933e-09	96.37	3.47165e-09	2	1573.86	-0.0351135	787.433	39.5781	0
	High	SGTVGFQHR	3	1	1	A0A0B4LGZ5		0	231503758	0	1.341e-05	60.51	1.16041e-05	2	988.496	0.0171405	494.752	13.9427	0
	High	YDGIILNTKK	4	1	1	A0A0B4LGZ5		0	631130350	0	2.206e-05	55.17	2.72159e-05	2	1164.66	-0.472701	582.835	40.8467	1
	High	AEEILER	2	1	1	A0A0B4LGZ5		0	863456784	0	0.006554	47.24	0.000226559	2	859.452	-0.435836	430.229	32.8264	0
	High	IAVHcTVR	3	1	1	A0A0B4LGZ5	C5(Carbamidomethyl)	0	1214308670	0	0.003242	47.14	0.000179673	2	955.515	0.546063	478.261	16.097	0
	High	LcLNIcVGESGDRLTR	3	1	1	A0A0B4LGZ5	C2(Carbamidomethyl); C6(Carbamidomethyl)	0	305704748	0	7.029e-06	46.23	0.00035973	3	1862.92	0.108202	621.645	38.4442	1
	High	YDPSIGIYGLDFYVVLGRPGYNVNHR	3	1	1	A0A0B4LGZ5		0	92157911	0	5.731e-11	32.95	0.0079851	4	2984.51	1.00595	746.883	116.09	1
	High	YDGIILNTK	1	1	1	A0A0B4LGZ5		0	762009571	0	0.0001875	28.82	0.0168618	2	1036.57	1.47019	518.788	57.9031	0
	High	NPMRDLHIRK	1	1	1	A0A0B4LGZ5		0	119199663	0	0.002431	28.82	0.0129252	3	1279.71	0.058295	427.24	17.5114	2
	High	YDPSIGIYGLDFYVVLGRPGYNVNHRK	2	1	1	A0A0B4LGZ5		0	606561806	0	6.063e-09	23.14	0.0834696	4	3112.6	-0.996131	778.905	103.518	2
	High	ENFSSTGNFGFGIQEHIDLGIK	2	1	1	A0A0B4LGZ5		0	6.00405e+07	0	4.537e-08	21.47	0.114056	3	2410.17	-0.159294	804.061	129.383	0
	High	VREYELR	2	1	1	A0A0B4LGZ5		0	442967052	0.001	0.02872	31.57	0.00895165	2	964.521	-0.112639	482.764	24.3203	1
	High	NPMRDLHIR	1	1	1	A0A0B4LGZ5		0	5.95459e+07	0.001	0.014	15.51	0.291032	3	1151.61	0.594167	384.542	33.2742	1
	High	NPmRDLHIRK	1	1	1	A0A0B4LGZ5	M3(Oxidation)	0	6.173e+06	0.001	0.01923	8.17	1.58501	3	1295.7	-0.304545	432.571	14.0255	2
	High	VREYELRR	1	1	1	A0A0B4LGZ5		0	973020838	0.003	0.1144	28.03	0.0150315	3	1120.62	0.313155	374.212	15.4655	2
Q59E30	Failed axon connections, isoform C OS=Drosophila melanogaster OX=7227 GN=fax PE=1 SV=1 - [Q59E30_DROME]	1650.96	1.49216e+09	51	60.24	5	21	21	415	46.6146	5.24951
	A2	Sequence	# PSMs	# Proteins	# Protein Groups	Protein Group Accessions	Modifications	ΔCn	Area	q-Value	PEP	IonScore	Exp Value	Charge	MH+ [Da]	ΔM [ppm]	m/z [Da]	RT [min]	# Missed Cleavages
	High	AHGIGVHSAEEIEEFGKDDLK	5	5	1	Q59E30		0	1673893496	0	4.402e-13	134.6	5.02768e-13	2	2281.1	-3.40934	1141.05	63.0387	1
	High	SAAPPADSAAAPAAAPAVEK	5	1	1	Q59E30		0	1195775528	0	2.318e-14	101.86	1.10777e-09	2	1762.9	0.219659	881.952	27.9185	0
	High	YLDSGLTAEQR	2	5	1	Q59E30		0	639054618	0	8.457e-07	91.27	6.4941e-09	2	1252.62	-0.473221	626.812	29.0028	0
	High	aSEVAQIPAEETPAVAAAEK	3	1	1	Q59E30	N-Term(Acetyl)	0	1094746783	0	3.101e-08	82.4	1.06169e-07	2	2024.02	1.0262	1012.51	93.5328	0
	High	QQDGEEPKKDEAVAAPVATK	3	1	1	Q59E30		0	3.50669e+08	0	2.42e-09	77.28	3.27369e-07	2	2111.06	-2.10548	1056.03	30.6771	2
	High	SNEQEGTEGDKIEK	3	5	1	Q59E30		0	28855069	0	3.033e-08	75.64	2.22412e-07	2	1563.72	3.24233	782.363	18.4	1
	High	cPNLIGHVSR	4	5	1	Q59E30	C1(Carbamidomethyl)	0	440380894	0	2.207e-06	63.05	4.45905e-06	2	1152.6	0.741867	576.801	22.3753	0
	High	DIAYPLRDYMTEK	4	5	1	Q59E30		0	2.71009e+08	0	3.467e-07	62.68	6.93271e-06	2	1614.78	-2.21121	807.893	41.0268	1
	High	LPNSILNFFFK	1	5	1	Q59E30		0	74047820	0	3.574e-07	61.49	5.81854e-06	2	1339.74	0.965707	670.375	61.688	0
	High	TPLLPSLSPYcLK	2	1	1	Q59E30	C11(Carbamidomethyl)	0	1606807752	0	2.463e-06	57.83	5.07634e-05	2	1488.81	1.25852	744.911	96.6505	0
	High	KGQLPFIELNGEEIADSAIIIK	1	5	1	Q59E30		0	6.50962e+06	0	6.516e-10	50.56	6.68057e-05	3	2398.32	-0.0851748	800.112	129.484	1
	High	VNLQHALGLRLPNSILNFFFK	3	5	1	Q59E30		0	71245808	0	9.722e-11	48.13	9.76728e-05	3	2441.38	-0.930874	814.465	59.3135	1
	High	ELSSKYEK	3	5	1	Q59E30		0	1.49983e+07	0	0.0001152	43.68	0.000372837	2	983.504	-0.0510472	492.256	9.57051	1
	High	DIIYLYQFSR	2	1	1	Q59E30		0	499190096	0	0.000156	41.14	0.00134982	2	1317.68	-0.577	659.345	51.7785	0
	High	cFPDWDEIcTK	1	5	1	Q59E30	C1(Carbamidomethyl); C9(Carbamidomethyl)	0	3.7996e+07	0	1.542e-05	38.55	0.000314183	2	1470.61	1.71017	735.806	85.8572	0
	High	LDLNAHIPKPEPETK	4	5	1	Q59E30		0	825853669	0	4.118e-09	38.48	0.00236273	2	1701.92	0.256633	851.462	53.7699	1
	High	DEAVAAPVATK	1	1	1	Q59E30		0	5.3455e+06	0	0.007919	37.01	0.00159254	2	1071.57	-0.654078	536.287	38.9528	0
	High	AKYPDNVLK	1	5	1	Q59E30		0	67983633	0	6.196e-05	31.55	0.0102177	3	1047.59	2.08394	349.867	21.1247	1
	High	LVGLKYENVDHK	1	1	1	Q59E30		0	0	0	0.0001078	15.21	0.46099	3	1414.77	-0.313841	472.261	36.6142	1
	High	YPDNVLK	1	5	1	Q59E30		0	2.4488e+08	0.002	0.05557	9.8	1.3665	2	848.452	0.442476	424.729	39.9101	0
	High	DIAYPLR	1	5	1	Q59E30		0	2.57203e+07	0.005	0.1958	29.02	0.0207395	2	847.468	0.876542	424.238	60.014	0
Q9VBH8	60S ribosomal protein L34 OS=Drosophila melanogaster OX=7227 GN=RpL34a PE=1 SV=2 - [Q9VBH8_DROME]	481.447	1.44053e+09	31	42.59	1	3	12	162	18.0574	11.4438
	A2	Sequence	# PSMs	# Proteins	# Protein Groups	Protein Group Accessions	Modifications	ΔCn	Area	q-Value	PEP	IonScore	Exp Value	Charge	MH+ [Da]	ΔM [ppm]	m/z [Da]	RT [min]	# Missed Cleavages
	High	TYGGVLcHScLR	5	2	2	Q9VBH8;Q9VHE5	C7(Carbamidomethyl); C10(Carbamidomethyl)	0	1851031434	0	3.222e-08	79.25	9.50802e-08	2	1422.66	1.08691	711.835	25.7709	0
	High	EALVKPVK	2	2	2	Q9VBH8;Q9VHE5		0	335541300	0	0.0002332	53.03	1.26923e-05	2	883.562	0.993725	442.285	16.9784	1
	High	RLSYNTR	2	2	2	Q9VBH8;Q9VHE5		0	2.50828e+08	0	0.0002588	42.44	0.000464684	2	909.49	-0.147887	455.249	12.0509	1
	High	AFLIEEQK	2	2	2	Q9VBH8;Q9VHE5		0	1.80751e+09	0	0.003566	39.07	0.00155469	2	977.531	0.800136	489.269	30.86	0
	High	SQREALVKPVKK	3	1	1	Q9VBH8		0	5.22087e+07	0	1.499e-06	38.54	0.000517847	3	1382.85	0.943316	461.621	8.0292	3
	High	SQREALVKPVK	5	2	2	Q9VBH8;Q9VHE5		0	364736511	0	4.145e-08	35.37	0.00191665	3	1254.75	0.212124	418.923	14.7946	2
	High	SQREALVK	1	2	2	Q9VBH8;Q9VHE5		0	3.00974e+07	0	0.001527	33.63	0.00890865	2	930.537	-0.088774	465.772	7.61188	1
	High	KNPTVPR	1	2	2	Q9VBH8;Q9VHE5		0	9.6824e+07	0	0.006242	33.34	0.00164524	2	811.478	-0.149335	406.243	7.66329	1
	High	EALVKPVKK	3	1	1	Q9VBH8		0	8.75991e+06	0	0.008221	33.14	0.000484139	2	1011.66	0.0842812	506.332	9.70022	2
	High	LVYQYVK	2	2	2	Q9VBH8;Q9VHE5		0	663051168	0	0.00816	26.97	0.0152691	2	912.519	0.431123	456.763	27.3343	0
	High	LHGITPSRPSERPR	4	1	1	Q9VBH8		0	6.2786e+08	0	0.007296	14.63	0.523412	3	1602.88	-0.00806604	534.966	16.7975	2
	High	TYGGVLcHScLRER	1	2	2	Q9VBH8;Q9VHE5	C7(Carbamidomethyl); C10(Carbamidomethyl)	0	2.81676e+07	0	0.000639	11.86	0.840601	3	1707.81	2.37327	569.941	37.4315	1
Q9W499	60S ribosomal protein L35 OS=Drosophila melanogaster OX=7227 GN=RpL35 PE=1 SV=2 - [Q9W499_DROME]	287.595	1.4303e+09	28	30.89	1	9	9	123	14.4406	11.1802
	A2	Sequence	# PSMs	# Proteins	# Protein Groups	Protein Group Accessions	Modifications	ΔCn	Area	q-Value	PEP	IonScore	Exp Value	Charge	MH+ [Da]	ΔM [ppm]	m/z [Da]	RT [min]	# Missed Cleavages
	High	VYIVMHQK	3	1	1	Q9W499		0	749656840	0	0.0007022	40.98	0.00148427	2	1017.55	-0.351073	509.281	20.0798	0
	High	RSVFPQRK	12	1	1	Q9W499		0	1.6477e+08	0	0.004991	39.8	0.00130368	2	1017.6	-0.00870434	509.301	8.94201	2
	High	KYKPLDLRK	4	1	1	Q9W499		0	3.25136e+08	0	2.302e-05	35.42	0.00101913	2	1160.72	0.282869	580.861	14.8111	3
	High	QLDELKNELLSLR	1	1	1	Q9W499		0	3.79108e+07	0	2.328e-05	30.42	0.011257	3	1570.88	0.897909	524.299	90.705	1
	High	YKPLDLRK	2	1	1	Q9W499		0	1690201560	0	0.004857	25.76	0.0246878	2	1032.62	0.908347	516.814	18.5395	2
	High	SVFPQRK	1	1	1	Q9W499		0	5.03476e+07	0	0.007056	15.64	0.315197	2	861.494	-0.0279879	431.251	15.1077	1
	High	VYIVmHQK	1	1	1	Q9W499	M5(Oxidation)	0	1.13197e+07	0	0.003987	13.54	0.951565	2	1033.55	-0.681501	517.278	19.1762	0
	High	RSVFPQR	1	1	1	Q9W499		0	0	0	0.005903	10.16	1.80236	2	889.5	0.057869	445.254	21.8868	1
	High	NELLSLR	2	1	1	Q9W499		0	1851034764	0.001	0.01573	35.85	0.0048623	2	844.489	0.535283	422.748	56.4315	0
	High	KYKPLDLR	1	1	1	Q9W499		0	1.12003e+08	0.005	0.2267	33.17	0.00390378	2	1032.62	0.199063	516.814	25.57	2
A0A0B4LFD9	40S ribosomal protein S23 OS=Drosophila melanogaster OX=7227 GN=RpS23 PE=2 SV=1 - [A0A0B4LFD9_DROME]	662.717	1.42514e+09	22	44.76	1	9	9	143	16.0068	10.5942
	A2	Sequence	# PSMs	# Proteins	# Protein Groups	Protein Group Accessions	Modifications	ΔCn	Area	q-Value	PEP	IonScore	Exp Value	Charge	MH+ [Da]	ΔM [ppm]	m/z [Da]	RT [min]	# Missed Cleavages
	High	DGSLNYIEENDEVLVAGFGRK	5	1	1	A0A0B4LFD9		0	8.0086e+08	0	6.639e-13	108.26	2.22426e-10	2	2325.13	-1.07216	1163.07	102.689	1
	High	VANVSLLALYK	3	1	1	A0A0B4LFD9		0	2123076866	0	4.926e-06	78.49	8.2116e-08	2	1190.72	0.940947	595.861	43.982	0
	High	ANPFGGASHAK	4	1	1	A0A0B4LFD9		0	7.33885e+08	0	2.804e-06	54.94	2.61311e-05	2	1056.52	0.319195	528.765	15.0094	0
	High	KITAFVPR	2	1	1	A0A0B4LFD9		0	992388052	0	0.0002358	47.64	8.17888e-05	2	931.573	0.484385	466.29	35.7291	1
	High	ITAFVPRDGSLNYIEENDEVLVAGFGRK	1	1	1	A0A0B4LFD9		0	87500741	0	2.145e-12	47.32	0.000243739	4	3109.6	0.0516018	778.154	103.359	2
	High	GHAVGDIPGVR	3	1	1	A0A0B4LFD9		0	1159969856	0	2.526e-05	45.6	0.000465465	2	1077.58	0.654035	539.294	23.123	0
	High	WKANPFGGASHAK	1	1	1	A0A0B4LFD9		0	8339385	0	0.009419	7.6	1.92896	3	1370.7	0.277752	457.57	29.4303	1
	High	ITAFVPR	2	1	1	A0A0B4LFD9		0	8.69578e+08	0.001	0.03846	36.88	0.00151786	2	803.478	0.408806	402.243	28.5851	0
	High	KGHAVGDIPGVR	1	1	1	A0A0B4LFD9		0	40860663	0.004	0.1527	6.07	2.81777	3	1205.67	-1.5522	402.563	27.4513	1
A0A0B4JD48	Cysteine proteinase-1, isoform D OS=Drosophila melanogaster OX=7227 GN=Cp1 PE=1 SV=1 - [A0A0B4JD48_DROME]	840.618	1404462454	26	47.39	1	11	11	249	27.0238	5.43994
	A2	Sequence	# PSMs	# Proteins	# Protein Groups	Protein Group Accessions	Modifications	ΔCn	Area	q-Value	PEP	IonScore	Exp Value	Charge	MH+ [Da]	ΔM [ppm]	m/z [Da]	RT [min]	# Missed Cleavages
	High	YGNNGcNGGLMDNAFR	1	1	1	A0A0B4JD48	C6(Carbamidomethyl)	0	3.53463e+07	0	6.331e-09	114.46	6.98288e-12	2	1759.73	0.61941	880.368	65.4507	0
	High	SGVLVSLSEQNLVDcSTK	3	1	1	A0A0B4JD48	C15(Carbamidomethyl)	0	1.34927e+06	0	7.568e-09	99.61	1.58624e-09	2	1935.97	2.15446	968.49	87.8689	0
	High	GTVGATDRGFTDIPQGDEK	4	1	1	A0A0B4JD48		0	1380433660	0	3.831e-08	72.11	7.25909e-07	2	1963.94	0.453037	982.472	52.0468	1
	High	SYPYEAIDDScHFNK	4	1	1	A0A0B4JD48	C11(Carbamidomethyl)	0	1858952560	0	1.114e-07	70.4	1.32242e-07	2	1845.77	-0.361788	923.391	61.5374	0
	High	DQGHcGScWAFSSTGALEGQHFRK	3	1	1	A0A0B4JD48	C5(Carbamidomethyl); C8(Carbamidomethyl)	0	6.03744e+08	0	1.439e-15	70.25	3.39862e-07	3	2723.18	-2.76316	908.397	60.3208	1
	High	DQGHcGScWAFSSTGALEGQHFR	2	1	1	A0A0B4JD48	C5(Carbamidomethyl); C8(Carbamidomethyl)	0	2.27089e+08	0	1.676e-09	55.73	5.61331e-06	4	2595.09	0.975715	649.528	71.6149	0
	High	NSWGTTWGDK	2	1	1	A0A0B4JD48		0	974001142	0	0.0009712	48.52	5.20238e-05	2	1151.51	0.939296	576.26	31.3564	0
	High	GFTDIPQGDEK	2	1	1	A0A0B4JD48		0	456326872	0	0.000229	45.59	0.000425129	2	1206.56	0.806889	603.786	29.2403	0
	High	GTVGATDRGFTDIPQGDEKK	2	1	1	A0A0B4JD48		0	5.30675e+07	0	0.001102	26.38	0.0398149	2	2092.03	1.12583	1046.52	43.3833	2
	High	GFTDIPQGDEKK	2	1	1	A0A0B4JD48		0	6.58453e+07	0	1.992e-05	18.08	0.202276	3	1334.66	-1.90963	445.557	37.6034	1
	High	ENQcGIASASSYPLV	1	1	1	A0A0B4JD48	C4(Carbamidomethyl)	0	390205706	0.004	0.1554	3.07	3.97005	2	1595.74	0.568601	798.373	46.4648	0
Q9VTK9	Aldo-keto reductase 1B, isoform A OS=Drosophila melanogaster OX=7227 GN=Akr1B PE=1 SV=2 - [Q9VTK9_DROME]	1438.28	1.38991e+09	53	69.94	2	1	20	316	35.8997	6.65381
	A2	Sequence	# PSMs	# Proteins	# Protein Groups	Protein Group Accessions	Modifications	ΔCn	Area	q-Value	PEP	IonScore	Exp Value	Charge	MH+ [Da]	ΔM [ppm]	m/z [Da]	RT [min]	# Missed Cleavages
	High	HIDcAYVYQNEDEVGDGVEAK	6	4	2	M9PI17;Q9VTK9	C4(Carbamidomethyl)	0	130554494	0	3.238e-13	125.79	6.59083e-13	2	2411.05	-0.195635	1206.03	63.7304	0
	High	LWNTFHRPDLVK	5	4	2	M9PI17;Q9VTK9		0	940639632	0	1.527e-08	74	5.49388e-07	2	1525.83	0.139608	763.417	31.4287	1
	High	SALENTLSSLK	2	4	2	M9PI17;Q9VTK9		0	1330703334	0	2.044e-06	68.62	2.34274e-06	2	1162.63	2.06029	581.821	36.6606	0
	High	DITITAYSPLGSPNRPWAK	3	4	2	M9PI17;Q9VTK9		0	1.02841e+09	0	9.785e-08	68.41	2.92028e-06	2	2087.09	1.04671	1044.05	90.1436	1
	High	VLEVATIPPVTNQIEcHPYLTQK	3	4	2	M9PI17;Q9VTK9	C16(Carbamidomethyl)	0	1714060736	0	1.852e-10	68.02	2.12978e-06	3	2650.39	-0.0577433	884.135	44.65	0
	High	TLYSPVDYVDTWK	7	4	2	M9PI17;Q9VTK9		0	8.79175e+08	0	1.029e-06	66.49	3.19753e-06	2	1586.77	0.530908	793.891	98.8067	0
	High	YLDLYLIHWPMGYK	4	4	2	M9PI17;Q9VTK9		0	183842478	0	2.283e-09	65.61	3.91575e-06	3	1811.92	1.65509	604.646	54.8786	0
	High	TPGQILIR	2	4	2	M9PI17;Q9VTK9		0	1057187144	0	0.00149	61.26	2.58118e-06	2	897.552	0.625431	449.28	28.5827	0
	High	REDLFITSK	3	4	2	M9PI17;Q9VTK9		0	888917700	0	2.486e-05	60.8	1.2726e-05	2	1108.6	0.575587	554.804	26.1459	1
	High	EVPIIGLGTWGSPK	3	2	2	Q9VTK9;M9PI17		0	1062970554	0	1.98e-06	55.64	2.42879e-05	2	1453.8	-0.448762	727.406	100.411	0
[truncated: 16,430 more rows]

## Sheet: params
Search report summary of file(s):
- Z:\MS_DATA\Proteomics Data FY2022\Zhao\MS227463LUM_eric_Zhao\MS227463LUM_eric_Zhao_D-mel-embryos-DDA,PRM_re-search-custom DB.msf
Created with Discoverer version: 1.4.1.14
================================================================================
Number of filtered/unfiltered result items:
- 1963/1977 protein group(s)
- 3553/3553 merged protein(s)
- 14091/14091 peptide(s)
- 26853/26853 PSM(s)
- 120330/120330 search input(s)
================================================================================
Peptide Grouping Options
- Show peptide groups: True
- Group peptides by: Mass and Sequence
Protein Grouping Options
- Enable protein grouping: True
- Consider leucine and isoleucine as equal: True
- Consider only PSMs with confidence at least: Medium
- Consider only PSMs with delta Cn better than: 0.15
- Apply strict maximum parsimony principle: True
Data reduction filters:
#NAME?
- Peptide Mass Deviation (Mass deviation: 5 ppm)
- Peptide Rank (Maximum rank: 1)
No result filters applied
================================================================================
Summary of file Z:\MS_DATA\Proteomics Data FY2022\Zhao\MS227463LUM_eric_Zhao\MS227463LUM_eric_Zhao_D-mel-embryos-DDA,PRM_re-search-custom DB.msf
Workflow created with Discoverer version: 1.4.1.14 (DBVersion:79)
================================================================================
Search name: MS227463LUM_eric_Zhao_D-mel-embryos-DDA,PRM_re-search-custom DB
Search description: Workflow for deep searching.
Add the Spectral Library and Protein Database (reciprocal FASTA)
Search date: 12/17/2021 09:53:50
================================================================================
The pipeline tree:
------------------
|-(0) Spectrum Files
|-(1) Spectrum Selector
|-(2) Mascot
|-(3) Percolator
|-(4) Event Detector
|-(5) Precursor Ions Area Detector
------------------------------------------------------------------------------
Processing node 0: Spectrum Files
------------------------------------------------------------------------------
Input Data:
-----------------------------
File Name(s):
	Z:\MS_DATA\Proteomics Data FY2022\Zhao\MS227463LUM_eric_Zhao\MS227463LUM_eric_Zhao_D-mel-embryos-10-20_a.raw
	Z:\MS_DATA\Proteomics Data FY2022\Zhao\MS227463LUM_eric_Zhao\MS227463LUM_eric_Zhao_D-mel-embryos-10-20-PRM_a.raw
------------------------------------------------------------------------------
Processing node 1: Spectrum Selector
------------------------------------------------------------------------------
1. General Settings:
-----------------------------
Precursor Selection: Use MS1 Precursor
Use New Precursor Reevaluation: True
2. Spectrum Properties Filter:
-----------------------------
Lower RT Limit: 0
Upper RT Limit: 0
First Scan: 0
Last Scan: 0
Lowest Charge State: 0
Highest Charge State: 0
Min. Precursor Mass: 350 Da
Max. Precursor Mass: 5000 Da
Total Intensity Threshold: 0
Minimum Peak Count: 1
3. Scan Event Filters:
-----------------------------
MS Order: Is MS2
Min. Collision Energy: 0
Max. Collision Energy: 100
Scan Type: Is Full
4. Peak Filters:
-----------------------------
S/N Threshold (FT-only): 1.5
5. Replacements for Unrecognized Properties:
-----------------------------
Unrecognized Charge Replacements: Automatic
Unrecognized Mass Analyzer Replacements: ITMS
Unrecognized MS Order Replacements: MS2
Unrecognized Activation Type Replacements: CID
Unrecognized Polarity Replacements: +
6. Just for Testing:
-----------------------------
Precursor Clipping Range Before: 2.5 Da
Precursor Clipping Range After: 5.5 Da
------------------------------------------------------------------------------
Processing node 2: Mascot
------------------------------------------------------------------------------
1. Input Data:
-----------------------------
Protein Database: DOME-CON-ERIC
Enzyme Name: Trypsin/P
Maximum Missed Cleavage Sites: 3
Instrument: Default
Taxonomy: All entries
1.1 Peptide Scoring Options:
-----------------------------
Peptide Cut Off Score: 1
Peptide Without Protein Cut Off Score: 5
1.2 Protein Scoring Options:
-----------------------------
Use MudPIT Scoring: Automatic
Protein Relevance Threshold: 20
Protein Relevance Factor: 1
2. Tolerances:
-----------------------------
Precursor Mass Tolerance: 10 ppm
Fragment Mass Tolerance: 20 mmu
Use Average Precursor Mass: False
4. Dynamic Modifications:
-----------------------------
2. Dynamic Modification: Oxidation (M)
3. Dynamic Modification: Acetyl (Protein N-term)
5. Static Modifications:
-----------------------------
1. Static Modification: Carbamidomethyl (C)
------------------------------------------------------------------------------
Processing node 5: Precursor Ions Area Detector
------------------------------------------------------------------------------
------------------------------------------------------------------------------
Processing node 3: Percolator
------------------------------------------------------------------------------
1. Input Data:
-----------------------------
Maximum Delta Cn: 0.05
2. Decoy Database Search:
-----------------------------
Target FDR (Strict): 0.01
Target FDR (Relaxed): 0.05
Validation based on: q-Value
------------------------------------------------------------------------------
Processing node 4: Event Detector
------------------------------------------------------------------------------
1. General Settings:
-----------------------------
Mass Precision: 2 ppm
S/N Threshold: 1
================================================================================
Further information:
Mascot (2):
- Fasta database information: FASTA db: DOME-CON-ERIC_20211217.fasta
Version: 2.5
Number of sequences: 20104
Number of sequences after taxonomy: 20104
Taxonomy:
Enzyme:
Number of queries: 120330
- MudPitScoring: True
Percolator (3):
- Percolator Output: Results for Mascot (2):
Iteration 1 :	After the iteration step, 26258 target PSMs with q<0.01 were estimated by cross validation
Iteration 2 :	After the iteration step, 26886 target PSMs with q<0.01 were estimated by cross validation
Iteration 3 :	After the iteration step, 27010 target PSMs with q<0.01 were estimated by cross validation
Iteration 4 :	After the iteration step, 27041 target PSMs with q<0.01 were estimated by cross validation
Iteration 5 :	After the iteration step, 27040 target PSMs with q<0.01 were estimated by cross validation
Iteration 6 :	After the iteration step, 27045 target PSMs with q<0.01 were estimated by cross validation
Iteration 7 :	After the iteration step, 27054 target PSMs with q<0.01 were estimated by cross validation
Iteration 8 :	After the iteration step, 27051 target PSMs with q<0.01 were estimated by cross validation
Iteration 9 :	After the iteration step, 27050 target PSMs with q<0.01 were estimated by cross validation
Iteration 10 :	After the iteration step, 27050 target PSMs with q<0.01 were estimated by cross validation
Feature name	Raw weight	Normalized weight
IonScore	0.0226	0.588
Delta Cn From Second PSM	1.6038	0.3272
Binomial Score	0.0087	1.5846
Isolation Interference [%]	0.0059	0.1423
MH+ [Da]	0.0018	1.0271
Delta Mass [Da]	9.3328	0.0457
Delta Mass [ppm]	0.0304	0.1074
Absolute Delta Mass [Da]	-62.5853	-0.2342
Absolute Delta Mass [ppm]	-0.0017	-0.0046
Peptide Length	0.0439	0.2372
Is z=1	0	0
Is z=2	-0.1125	-0.0526
Is z=3	0.1885	0.0838
Is z=4	-0.2611	-0.0575
Is z=5	0	0
Is z>5	0	0
# Missed Cleavages	0.0305	0.0235
Log Peptides Matched	0	0
Log Total Intensity	-0.8396	-0.448
Fraction Matched Intensity [%]	-0.0126	-0.172
Fragment Coverage Series A, B, C [%]	-0.0234	-0.4846
Fragment Coverage Series X, Y, Z [%]	0.0349	0.9308
Log Matched Fragment Series Intensities A, B, C	0.032	0.1566
Log Matched Fragment Series Intensities X, Y, Z	0.024	0.0697
Longest Sequence Series A, B, C	0.1358	0.3484
Longest Sequence Series X, Y, Z	0.3265	1.4094
IQR Fragment Delta Mass [Da]	-150.06	-0.6227
IQR Fragment Delta Mass [ppm]	0.0134	0.1183
Mean Fragment Delta Mass [Da]	11.5965	0.0278
Mean Fragment Delta Mass [ppm]	0.0132	0.0779
Mean Absolute Fragment Delta Mass [Da]	-344.238	-0.853
Mean Absolute Fragment Delta Mass [ppm]	0.0294	0.1885
m0	-3.5956	0.9307
================================================================================
Processing details:
2021-12-17 11:43:00	(5):Precursor Ions Area Detector:	Whole quantification took 7 min 26 s.
2021-12-17 11:43:00	(5):Precursor Ions Area Detector:	Storing 10972 remaining single precursor patterns ...
2021-12-17 11:43:00	(5):Precursor Ions Area Detector:	Storing 0 precursor ion quantification results ...
2021-12-17 11:43:00	(5):Precursor Ions Area Detector:	Storing 0 peptide verification results ...
2021-12-17 11:41:00	(5):Precursor Ions Area Detector:	Start verification of peptides identified from Mascot
2021-12-17 11:41:00	(5):Precursor Ions Area Detector:	Start quantification for file: Z:\MS_DATA\Proteomics Data FY2022\Zhao\MS227463LUM_eric_Zhao\MS227463LUM_eric_Zhao_D-mel-embryos-10-20-PRM_a.raw ...
2021-12-17 11:41:00	(5):Precursor Ions Area Detector:	Storing 15431 remaining single precursor patterns ...
2021-12-17 11:41:00	(5):Precursor Ions Area Detector:	Storing 0 precursor ion quantification results ...
2021-12-17 11:41:00	(5):Precursor Ions Area Detector:	Storing 0 peptide verification results ...
2021-12-17 11:35:00	(5):Precursor Ions Area Detector:	Start verification of peptides identified from Mascot
2021-12-17 11:35:00	(5):Precursor Ions Area Detector:	Start quantification for file: Z:\MS_DATA\Proteomics Data FY2022\Zhao\MS227463LUM_eric_Zhao\MS227463LUM_eric_Zhao_D-mel-embryos-10-20_a.raw ...
2021-12-17 11:35:00	(4):Event Detector:	All 2 files processed in 21 min 29 s
2021-12-17 11:35:00	(4):Event Detector:	Event proccessing finished after 1 min 34 s.
2021-12-17 11:34:00	(4):Event Detector:	Start Event Processing on: Z:\MS_DATA\Proteomics Data FY2022\Zhao\MS227463LUM_eric_Zhao\MS227463LUM_eric_Zhao_D-mel-embryos-10-20-PRM_a.raw with scan filter: FTMS + p NSI Full ms [300.00-1000.00]
2021-12-17 11:33:00	(4):Event Detector:	Event proccessing finished after 18 min 45 s.
2021-12-17 11:14:00	(4):Event Detector:	Start Event Processing on: Z:\MS_DATA\Proteomics Data FY2022\Zhao\MS227463LUM_eric_Zhao\MS227463LUM_eric_Zhao_D-mel-embryos-10-20_a.raw with scan filter: FTMS + p NSI Full ms [375.00-1500.00]
2021-12-17 11:14:00	(2):Mascot:	Total search time was 22 min 23 s.
2021-12-17 11:14:00	(3):Percolator:	Performing percolator for Mascot (2) took 36 min 37 s.
2021-12-17 11:14:00	(2):Mascot:	Search completed
2021-12-17 11:14:00	(2):Mascot:	4357 protein(s) + 3331 decoy proteins scored and inserted into result file in 32.6 s.
2021-12-17 11:14:00	(2):Mascot:	4357 protein(s) scored
2021-12-17 11:13:00	(2):Mascot:	Search result finalization started.
2021-12-17 11:13:00	(3):Percolator:	Start reading Percolator results
2021-12-17 11:13:00	(3):Percolator:	PSMId	score	q-value	posterior_error_prob	peptide	proteinIds
2021-12-17 11:13:00	(3):Percolator:	Processing took 112.9 cpu seconds or 112 seconds wall time
2021-12-17 11:13:00	(3):Percolator:	Calibrating statistics - calculating Posterior error probabilities (PEPs)
2021-12-17 11:13:00	(3):Percolator:	New pi_0 estimate on merged list gives 14548 peptides over q=0.0100
2021-12-17 11:12:00	(3):Percolator:	Calibrating statistics - calculating q values
2021-12-17 11:12:00	(3):Percolator:	Selecting pi_0=0.2523
2021-12-17 11:12:00	(3):Percolator:	Tossing out "redundant" PSMs keeping only the best scoring PSM for each unique peptide.
2021-12-17 11:12:00	(3):Percolator:	Merging results from 3 datasets
2021-12-17 11:12:00	(3):Percolator:	Found 26973 target PSMs scoring over 1.0000% FDR level on testset
2021-12-17 11:12:00	(3):Percolator:	0.0226	1.6038	0.0087	0.0059	0.0018	9.3328	0.0304	-62.5853	-0.0017	0.0439	0	-0.1125	0.1885	-0.2611	0	0	0.0305	0	-0.8396	-0.0126	-0.0234	0.0349	0.032	0.024	0.1358	0.3265	-150.06	0.0134	11.5965	0.0132	-344.238	0.0294	-3.5956
2021-12-17 11:12:00	(3):Percolator:	0.588	0.3272	1.5846	0.1423	1.0271	0.0457	0.1074	-0.2342	-0.0046	0.2372	0	-0.0526	0.0838	-0.0575	0	0	0.0235	0	-0.448	-0.172	-0.4846	0.9308	0.1566	0.0697	0.3484	1.4094	-0.6227	0.1183	0.0278	0.0779	-0.853	0.1885	0.9307
2021-12-17 11:12:00	(3):Percolator:	IonScore	Delta Cn From Second PSM	Binomial Score	Isolation Interference [%]	MH+ [Da]	Delta Mass [Da]	Delta Mass [ppm]	Absolute Delta Mass [Da]	Absolute Delta Mass [ppm]	Peptide Length	Is z=1	Is z=2	Is z=3	Is z=4	Is z=5	Is z>5	# Missed Cleavages	Log Peptides Matched	Log Total Intensity	Fraction Matched Intensity [%]	Fragment Coverage Series A, B, C [%]	Fragment Coverage Series X, Y, Z [%]	Log Matched Fragment Series Intensities A, B, C	Log Matched Fragment Series Intensities X, Y, Z	Longest Sequence Series A, B, C	Longest Sequence Series X, Y, Z	IQR Fragment Delta Mass [Da]	IQR Fragment Delta Mass [ppm]	Mean Fragment Delta Mass [Da]	Mean Fragment Delta Mass [ppm]	Mean Absolute Fragment Delta Mass [Da]	Mean Absolute Fragment Delta Mass [ppm]	m0
2021-12-17 11:12:00	(3):Percolator:	# first line contains normalized weights, second line the raw weights
2021-12-17 11:12:00	(3):Percolator:	Obtained weights (only showing weights of first cross validation set)
2021-12-17 11:12:00	(3):Percolator:	Iteration 10 :	After the iteration step, 27050 target PSMs with q<0.01 were estimated by cross validation
2021-12-17 11:12:00	(3):Percolator:	Iteration 9 :	After the iteration step, 27050 target PSMs with q<0.01 were estimated by cross validation
2021-12-17 11:12:00	(3):Percolator:	Iteration 8 :	After the iteration step, 27051 target PSMs with q<0.01 were estimated by cross validation
2021-12-17 11:12:00	(3):Percolator:	Iteration 7 :	After the iteration step, 27054 target PSMs with q<0.01 were estimated by cross validation
2021-12-17 11:12:00	(3):Percolator:	Iteration 6 :	After the iteration step, 27045 target PSMs with q<0.01 were estimated by cross validation
2021-12-17 11:11:00	(3):Percolator:	Iteration 5 :	After the iteration step, 27040 target PSMs with q<0.01 were estimated by cross validation
2021-12-17 11:11:00	(3):Percolator:	Iteration 4 :	After the iteration step, 27041 target PSMs with q<0.01 were estimated by cross validation
2021-12-17 11:11:00	(3):Percolator:	Iteration 3 :	After the iteration step, 27010 target PSMs with q<0.01 were estimated by cross validation
2021-12-17 11:11:00	(3):Percolator:	Iteration 2 :	After the iteration step, 26886 target PSMs with q<0.01 were estimated by cross validation
2021-12-17 11:11:00	(3):Percolator:	Iteration 1 :	After the iteration step, 26258 target PSMs with q<0.01 were estimated by cross validation
2021-12-17 11:11:00	(3):Percolator:	#NAME?
2021-12-17 11:11:00	(3):Percolator:	Reading in data and feature calculation took 99.141 cpu seconds or 100 seconds wall time
2021-12-17 11:11:00	(3):Percolator:	Estimating 23378 over q=0.01 in initial direction
2021-12-17 11:11:00	(3):Percolator:	Selected feature number 26 as initial search direction, could separate 15742 positives in that direction
2021-12-17 11:11:00	(3):Percolator:	Selected feature number 26 as initial search direction, could separate 15430 positives in that direction
2021-12-17 11:11:00	(3):Percolator:	Selected feature number 26 as initial search direction, could separate 15675 positives in that direction
2021-12-17 11:11:00	(3):Percolator:	selecting cneg by cross validation
2021-12-17 11:11:00	(3):Percolator:	selecting cpos by cross validation
2021-12-17 11:11:00	(3):Percolator:	Train/test set contains 35685 positives and 13245 negatives, size ratio=2.69422 and pi0=1
2021-12-17 11:10:00	(3):Percolator:	e6e22773-e9a6-4a26-9694-1ca77a797099 Delta Cn From Second PSM Binomial Score b8754504-e95e-476b-b9a4-454d4bb53aeb 1d91a87b-953a-4887-9f22-f75a497a3538 Delta Mass [Da] Delta Mass [ppm] Absolute Delta Mass [Da] Absolute Delta Mass [ppm] Peptide Length Is z=1 Is z=2 Is z=3 Is z=4 Is z=5 Is z>5 041eb6d5-e486-44a0-9bc1-19e25811c686 Log Peptides Matched Log Total Intensity Fraction Matched Intensity [%…
2021-12-17 11:10:00	(3):Percolator:	Features:
2021-12-17 11:10:00	(3):Percolator:	enzyme=Trypsin
2021-12-17 11:09:00	(3):Percolator:	Hyperparameters fdr=0.01, Cpos=0, Cneg=0, maxNiter=10
2021-12-17 11:09:00	(3):Percolator:	Started Fri Dec 17 11:09:32 2021
2021-12-17 11:09:00	(3):Percolator:	C:\Program Files\Thermo\Discoverer 1.4\Tools\Percolator\percolator.exe -X C:\ProgramData\Thermo\Discoverer 1.4\Scratch\4935fa0c-1f18-4ffd-9b8f-9b14e2ac1a0e\output.xml -Z C:\ProgramData\Thermo\Discoverer 1.4\Scratch\4935fa0c-1f18-4ffd-9b8f-9b14e2ac1a0e\input.xml
2021-12-17 11:09:00	(3):Percolator:	Issued command:
2021-12-17 11:09:00	(3):Percolator:	Department of Genome Sciences at the University of Washington.
2021-12-17 11:09:00	(3):Percolator:	Written by Lukas K├ñll (lukall@u.washington.edu) in the
2021-12-17 11:09:00	(3):Percolator:	Copyright (c) 2006-9 University of Washington. All rights reserved.
2021-12-17 11:09:00	(3):Percolator:	Percolator version 2.04, Build Date Feb 1 2012 03:35:34
2021-12-17 11:09:00	(3):Percolator:	Starting Percolator
2021-12-17 11:09:00	(3):Percolator:	The input file contains 35685 peptides, 13245 decoy peptides and 32 features.
2021-12-17 11:09:00	(3):Percolator:	Creating input file for Mascot (2) took 32 min 23 s.
2021-12-17 10:37:00	(3):Percolator:	Start calculating features for peptides of Mascot (2)
2021-12-17 10:37:00	(2):Mascot:	Used mascot server http://mascot2/mascot/ with Mascot version 2.5.1
2021-12-17 10:37:00	(2):Mascot:	Sending 4718 peptide hits (56841 peptides) to result file
2021-12-17 10:37:00	(2):Mascot:	Sending 823 decoy peptide hits (27850 peptides) to result file
2021-12-17 10:37:00	(2):Mascot:	Reading decoy results
2021-12-17 10:37:00	(2):Mascot:	Start translating results
2021-12-17 10:37:00	(2):Mascot:	Start mapping modifications
2021-12-17 10:36:00	(2):Mascot:	Sending 29735 peptide hits (51192 peptides) to result file
2021-12-17 10:36:00	(2):Mascot:	Sending 10539 decoy peptide hits (26557 peptides) to result file
2021-12-17 10:36:00	(2):Mascot:	Reading decoy results
2021-12-17 10:36:00	(2):Mascot:	Start translating results
2021-12-17 10:36:00	(2):Mascot:	Start mapping modifications
2021-12-17 10:32:00	(2):Mascot:	Received 4436 proteins from Mascot server
2021-12-17 10:32:00	(2):Mascot:	Start mapping 4436 proteins
2021-12-17 10:29:00	(2):Mascot:	Start parsing results
2021-12-17 10:29:00	(2):Mascot:	Received Mascot result file (filename=../data/20211217/F067270.dat)
2021-12-17 10:28:00	(2):Mascot:	Mascot Server completed
2021-12-17 10:27:00	(2):Mascot:	Mascot result on server (filename=../data/20211217/F067270.dat)
2021-12-17 10:27:00	(2):Mascot:	Start searching 27330 spectra
2021-12-17 10:23:00	(2):Mascot:	Received Mascot result file (filename=../data/20211217/F067269.dat)
2021-12-17 10:19:00	(2):Mascot:	Mascot Server completed
2021-12-17 10:13:00	(2):Mascot:	Mascot result on server (filename=../data/20211217/F067269.dat)
2021-12-17 10:12:00	(2):Mascot:	Start searching 93000 spectra
2021-12-17 10:08:00	(1):Spectrum Selector:	Reading from File 2 of 2:Z:\MS_DATA\Proteomics Data FY2022\Zhao\MS227463LUM_eric_Zhao\MS227463LUM_eric_Zhao_D-mel-embryos-10-20-PRM_a.raw (59644 spectra total)
2021-12-17 09:54:00	(2):Mascot:	Use mascot server http://mascot2/mascot/ with Mascot version 2.5.1
2021-12-17 09:54:00	(1):Spectrum Selector:	Reading from File 1 of 2:Z:\MS_DATA\Proteomics Data FY2022\Zhao\MS227463LUM_eric_Zhao\MS227463LUM_eric_Zhao_D-mel-embryos-10-20_a.raw (82033 spectra total)
